# Supplementary material
Source: PubMed Central journal article supplement (PMC3622723)
Supplement: NIHMS442180-supplement-supplementary.pdf [file NIHMS442180-supplement-supplementary.pdf]

**Supplemental Table 1:**

Results of primary druggable genome v2 (DG2) Achilles heel siRNA screen in KMS11 multiple myeloma cells. Results are provided per siRNA as a B-score centered on the median and normalized to the standard deviation.

All statistically validated vulnerable genes are listed in Table 1 in the paper; siRNA against other genes are unverified for sensitivity/specificity (individual siRNA results may be inaccurate and should be examined within a robust statistical framework).

| Entrez Gene | SYMBOL   | Description                                                      | siRNA B_Score | Target Sequence        | Vendor target annotation | Top refseq hit                                                         |
|-------------|----------|------------------------------------------------------------------|---------------|------------------------|--------------------------|------------------------------------------------------------------------|
| 1           | A1BG     | alpha-1-B glycoprotein                                           | 0.02          | CAGAAGATGCGTATCAGTATT  | NM_130786:               | NM_130786:                                                             |
| 1           | A1BG     | alpha-1-B glycoprotein                                           | -1.38         | CTGGCTCTACGTGGACCTGAA  | NM_130786:               | NM_130786:                                                             |
| 2           | A2M      | alpha-2-macroglobulin                                            | -4.22         | ACGGATGAGCATGGCCTTGTA  | NM_000014:               | NM_000014:                                                             |
| 2           | A2M      | alpha-2-macroglobulin                                            | 0.20          | CACCAACTCAAAGATTCGTA   | NM_000014:               | NM_000014:                                                             |
| 53947       | A4GALT   | alpha 1,4-galactosyltransferase (globotriaosylceramide synthase) | 0.85          | AGGAGAATAATCAATGAATA   | NM_017436:               | NM_017436:                                                             |
| 53947       | A4GALT   | alpha 1,4-galactosyltransferase (globotriaosylceramide synthase) | 1.32          | CACGTGCTGGTCCGTGATGAAA | NM_017436:               | NM_017436:                                                             |
| 13          | AADAC    | arylamide deacetylase (esterase)                                 | 0.67          | TTGGCTGATGACAACAATTA   | NM_001086:               | NM_001086:                                                             |
| 13          | AADAC    | arylamide deacetylase (esterase)                                 | 1.06          | CAGCCTCTTGTATGATGATTA  | NM_001086:               | NM_001086:                                                             |
| 22848       | AAK1     | AP2 associated kinase 1                                          | -1.50         | AACGTGAGTAGCGGTGATGTA  | NM_014911:               | NM_014911:                                                             |
| 22848       | AAK1     | AP2 associated kinase 1                                          | 0.53          | CCAGGTGTGTAACCTGATGAA  | NM_014911:               | NM_014911:                                                             |
| 10157       | AASS     | aminoadipate-semialdehyde synthase                               | 0.51          | AACGATTGATCTTGGCTTA    | NM_005763:               | NM_005763:                                                             |
| 10157       | AASS     | aminoadipate-semialdehyde synthase                               | 0.50          | AACGGTACATACCTGATAAA   | NM_005763:               | NM_005763:                                                             |
| 26574       | AATF     | apoptosis antagonizing transcription factor                      | 0.07          | TCGGAAGACTATGAACGGAA   | NM_012138:               | NM_012138:                                                             |
| 26574       | AATF     | apoptosis antagonizing transcription factor                      | -0.58         | TTGGAAGGAGGATCAAAGTA   | NM_012138:               | NM_012138:                                                             |
|             | AB095936 |                                                                  | 1.11          | TCGGGTGATTCCACTATAGAA  | AB095936                 | No hits found till 3 mismatches                                        |
| 18          | ABAT     | 4-aminobutyrate aminotransferase                                 | 0.59          | TCCCGATGATTCATACGGAA   | NM_000663:               | NM_020686:NM_000663:                                                   |
| 18          | ABAT     | 4-aminobutyrate aminotransferase                                 | -1.10         | CACGCACTCTAAAGCCATTCA  | NM_000663:               | NM_020686:NM_000663:                                                   |
| 19          | ABCA1    | ATP-binding cassette, sub-family A (ABC1), member 1              | -2.85         | CGGGAACATGCTACAATACCA  | NM_005502:               | NM_005502:                                                             |
| 19          | ABCA1    | ATP-binding cassette, sub-family A (ABC1), member 1              | 0.29          | CACCGCAATAAGCTGAAATA   | NM_005502:               | NM_005502:                                                             |
| 10349       | ABCA10   | ATP-binding cassette, sub-family A (ABC1), member 10             | 0.63          | AAAGAGATAAGCGTCCGCTCAA | NM_080282:               | NM_080282:                                                             |
| 10349       | ABCA10   | ATP-binding cassette, sub-family A (ABC1), member 10             | 0.61          | CAGCCTGTAAATCGTTAATAA  | NM_080282:               | NM_080282:                                                             |
| 26154       | ABCA12   | ATP-binding cassette, sub-family A (ABC1), member 12             | -2.28         | CAGGTGACTCCGATAATATAA  | NM_015657:               | NM_015657:                                                             |
| 26154       | ABCA12   | ATP-binding cassette, sub-family A (ABC1), member 12             | -0.97         | AAGCTAATGATCCGACTTTA   | NM_015657:               | NM_015657:NM_173076:                                                   |
| 20          | ABCA2    | ATP-binding cassette, sub-family A (ABC1), member 2              | -3.23         | TCGGAAGAACGTGACGCTCAA  | NM_001606:               | NM_001606:                                                             |
| 20          | ABCA2    | ATP-binding cassette, sub-family A (ABC1), member 2              | 1.06          | CTGGTCAGTCCCGTATTTAT   | NM_001606:               | NM_001606:NM_212533:                                                   |
| 21          | ABCA3    | ATP-binding cassette, sub-family A (ABC1), member 3              | 0.09          | CCGCTTGAAGATTGAGTCGGA  | NM_001089:               | NM_001089:                                                             |
| 21          | ABCA3    | ATP-binding cassette, sub-family A (ABC1), member 3              | 2.25          | CCAAGTTTATCTCATCCTTTA  | NM_001089:               | NM_001089:                                                             |
| 24          | ABCA4    | ATP-binding cassette, sub-family A (ABC1), member 4              | 1.42          | AAGGAGCCGATTGGATGAA    | NM_000350:               | NM_000350:                                                             |
| 24          | ABCA4    | ATP-binding cassette, sub-family A (ABC1), member 4              | -0.71         | CCGCTGAACATCACCTCTTA   | NM_000350:               | NM_000350:                                                             |
| 23461       | ABCA5    | ATP-binding cassette, sub-family A (ABC1), member 5              | 1.71          | GTACGTAATGTCCCAATCTAA  | NM_018672:               | NM_018672:NM_172232:                                                   |
| 23461       | ABCA5    | ATP-binding cassette, sub-family A (ABC1), member 5              | 0.61          | TGGCGAGCAATTCGAACTGCA  | NM_018672:               | NM_018672:NM_172232:                                                   |
| 23460       | ABCA6    | ATP-binding cassette, sub-family A (ABC1), member 6              | 1.68          | ACGGCAGGCTCGCCATCGCAA  | NM_080284:               | NM_080284:NM_172346:                                                   |
| 23460       | ABCA6    | ATP-binding cassette, sub-family A (ABC1), member 6              | 1.80          | AAGGATTACATTCTAGAGCTA  | NM_080284:               | NM_080284:NM_172346:                                                   |
| 10347       | ABCA7    | ATP-binding cassette, sub-family A (ABC1), member 7              | -0.59         | CCCGGCCACGTGCGCATCAA   | NM_019112:               | NM_019112:NM_033308:                                                   |
| 10347       | ABCA7    | ATP-binding cassette, sub-family A (ABC1), member 7              | 0.80          | CAGCAGGATGTGACCCGTGAA  | NM_019112:               | NM_019112:NM_033308:                                                   |
| 10351       | ABCA8    | ATP-binding cassette, sub-family A (ABC1), member 8              | -0.03         | TTGTTAGCATGCAATGCCAA   | NM_007168:               | NM_007168:                                                             |
| 10351       | ABCA8    | ATP-binding cassette, sub-family A (ABC1), member 8              | 0.91          | CTATCTGGCATTGGCGATTTA  | NM_007168:               | NM_007168:                                                             |
| 10350       | ABCA9    | ATP-binding cassette, sub-family A (ABC1), member 9              | -0.06         | TCGATAGTTGCTACTGATCTA  | NM_080283:               | NM_080283:NM_172386:                                                   |
| 10350       | ABCA9    | ATP-binding cassette, sub-family A (ABC1), member 9              | -2.64         | GAGGGCGATCATAGGCGATAA  | NM_080283:               | NM_080283:NM_172386:                                                   |
| 5243        | ABCB1    | ATP-binding cassette, sub-family B (MDR/TAP), member 1           | 0.60          | ATCGAGTCACTGCCTAATAAA  | NM_000927:               | NM_000927:                                                             |
| 5243        | ABCB1    | ATP-binding cassette, sub-family B (MDR/TAP), member 1           | -0.00         | CACGGAAGCGCTAATGCGGAA  | NM_000927:               | NM_000927:                                                             |
| 23456       | ABCB10   | ATP-binding cassette, sub-family B (MDR/TAP), member 10          | -3.24         | TAGACCCTAAGAAGTAATTA   | NM_012089:               | NM_012089:                                                             |
| 23456       | ABCB10   | ATP-binding cassette, sub-family B (MDR/TAP), member 10          | -3.19         | CTAGGTATTATTAAGAATGAA  | NM_012089:               | NM_012089:                                                             |
| 8647        | ABCB11   | ATP-binding cassette, sub-family B (MDR/TAP), member 11          | 0.84          | CGGGATGATGTCGAATTCCTT  | NM_003742:               | NM_003742:                                                             |
| 8647        | ABCB11   | ATP-binding cassette, sub-family B (MDR/TAP), member 11          | 0.02          | TCAGATCCGGATGATGATGAA  | NM_003742:               | NM_003742:                                                             |
| 5244        | ABCB4    | ATP-binding cassette, sub-family B (MDR/TAP), member 4           | 0.59          | CGCATGTCTACGGTCCGAAA   | NM_000443:               | NM_000443:NM_018849:NM_018850:                                         |
| 5244        | ABCB4    | ATP-binding cassette, sub-family B (MDR/TAP), member 4           | -0.93         | TCGGATTTAGTGACAAAGAA   | NM_000443:               | NM_000443:NM_018849:NM_018850:                                         |
| 340273      | ABCB5    | ATP-binding cassette, sub-family B (MDR/TAP), member 5           | 1.95          | TTGGAAGAATACGTAATATA   | NM_178559:               | NM_178559:                                                             |
| 340273      | ABCB5    | ATP-binding cassette, sub-family B (MDR/TAP), member 5           | -0.58         | TACGTACTATAGTGCATTTAA  | NM_178559:               | NM_178559:                                                             |
| 10058       | ABCB6    | ATP-binding cassette, sub-family B (MDR/TAP), member 6           | 0.06          | CAGGCTCTCAACTGTGGTCAA  | NM_005689:               | NM_005689:                                                             |
| 10058       | ABCB6    | ATP-binding cassette, sub-family B (MDR/TAP), member 6           | -2.04         | CACCTACATTCCAGCTGTA    | NM_005689:               | NM_005689:                                                             |
| 22          | ABCB7    | ATP-binding cassette, sub-family B (MDR/TAP), member 7           | -2.24         | AACCCCTACATAGTATCTTCA  | NM_004299:               | NM_004299:                                                             |
| 22          | ABCB7    | ATP-binding cassette, sub-family B (MDR/TAP), member 7           | -0.48         | AGCATTATCTTGCTGGTCAA   | NM_004299:               | NM_004299:                                                             |
| 11194       | ABCB8    | ATP-binding cassette, sub-family B (MDR/TAP), member 8           | -3.83         | AAGCTGGAAGTCTCCGATGAA  | NM_007188:               | NM_007188:                                                             |
| 11194       | ABCB8    | ATP-binding cassette, sub-family B (MDR/TAP), member 8           | 0.90          | AGGAATTTAAGTACCTCTCA   | NM_007188:               | NM_007188:                                                             |
| 23457       | ABCB9    | ATP-binding cassette, sub-family B (MDR/TAP), member 9           | 2.53          | CCCGTCAATAAAGTGTAATA   | NM_019624:               | NM_019624:NM_203445:NM_203444:NM_019625:                               |
| 23457       | ABCB9    | ATP-binding cassette, sub-family B (MDR/TAP), member 9           | 4.45          | CTGGCTGACCACGGCATCTA   | NM_019624:               | NM_019624:NM_203445:NM_203444:NM_019625:                               |
| 4363        | ABCC1    | ATP-binding cassette, sub-family C (CFTR/MRP), member 1          | -1.62         | CGGAGTGAATCCGGAACATA   | NM_004996:               | NM_004996:NM_019902:NM_019901:NM_019900:NM_019899:NM_019862:NM_019898: |
| 4363        | ABCC1    | ATP-binding cassette, sub-family C (CFTR/MRP), member 1          | -0.96         | TCGGATGTCATCTGAAATGGA  | NM_004996:               | NM_004996:NM_019902:NM_019901:NM_019900:NM_019899:NM_019862:NM_019898: |
| 89845       | ABCC10   | ATP-binding cassette, sub-family C (CFTR/MRP), member 10         | 0.01          | AGCCAGATTGTGGTAGATTA   | NM_033450:               | NM_033450:                                                             |
| 89845       | ABCC10   | ATP-binding cassette, sub-family C (CFTR/MRP), member 10         | 0.29          | CTGCTGTACCCGCTCAACAAA  | NM_033450:               | NM_033450:                                                             |
| 85320       | ABCC11   | ATP-binding cassette, sub-family C (CFTR/MRP), member 11         | 0.35          | AGGCTACTTGATGGCTCTCAA  | NM_032583:               | NM_145186:NM_033151:NM_032583:                                         |
| 85320       | ABCC11   | ATP-binding cassette, sub-family C (CFTR/MRP), member 11         | -1.84         | CTCCTCCAGTTGGATCATGAA  | NM_032583:               | NM_145186:NM_033151:NM_032583:                                         |
| 94160       | ABCC12   | ATP-binding cassette, sub-family C (CFTR/MRP), member 12         | -0.45         | CGGTAGGAAATACCCCTGAAA  | NM_033226:               | NM_145188:NM_145190:NM_145189:NM_145187:NM_033226:                     |
| 94160       | ABCC12   | ATP-binding cassette, sub-family C (CFTR/MRP), member 12         | 0.39          | CGGAAAGTCATCGTTAGGAA   | NM_033226:               | NM_033226:                                                             |
| 150000      | ABCC13   | ATP-binding cassette, sub-family C (CFTR/MRP), member 13         | 1.08          | CTCGCTTGAATGTATGCGATA  | NM_138726:               | NM_138726:                                                             |
| 150000      | ABCC13   | ATP-binding cassette, sub-family C (CFTR/MRP), member 13         | -0.30         | TAGGGTTATCTACAATATAA   | NM_138726:               | NM_138726:                                                             |
| 1244        | ABCC2    | ATP-binding cassette, sub-family C (CFTR/MRP), member 2          | -2.38         | CCGTATCAGGTTTGGCAGTTA  | NM_000392:               | NM_000392:                                                             |
| 1244        | ABCC2    | ATP-binding cassette, sub-family C (CFTR/MRP), member 2          | -1.35         | CTGGAGTACCTCAAGCAATA   | NM_000392:               | NM_000392:                                                             |
| 8714        | ABCC3    | ATP-binding cassette, sub-family C (CFTR/MRP), member 3          | -0.43         | AAGGGTGAATCCGCTATTGAT  | NM_003786:               | NM_020037:NM_020038:NM_003786:                                         |
| 8714        | ABCC3    | ATP-binding cassette, sub-family C (CFTR/MRP), member 3          | 0.01          | CCGGAATTTCTGTGCGCTA    | NM_003786:               | NM_020037:NM_020038:NM_003786:                                         |
| 10257       | ABCC4    | ATP-binding cassette, sub-family C (CFTR/MRP), member 4          | 0.07          | GAGGTTAAAGACAGTCATATA  | NM_005845:               | NM_005845:                                                             |
| 10257       | ABCC4    | ATP-binding cassette, sub-family C (CFTR/MRP), member 4          | -3.17         | CTCCTAGTACTAGAAATACA   | NM_005845:               | NM_005845:                                                             |
| 10057       | ABCC5    | ATP-binding cassette, sub-family C (CFTR/MRP), member 5          | -1.52         | ATAGCCTATATTACAGTGAA   | NM_005688:               | NM_005688:                                                             |
| 10057       | ABCC5    | ATP-binding cassette, sub-family C (CFTR/MRP), member 5          | 1.00          | ATCCTTCCAGTCAAACTCAA   | NM_005688:               | NM_005688:                                                             |
| 368         | ABCC6    | ATP-binding cassette, sub-family C (CFTR/MRP), member 6          | -1.28         | CACGTTGCTGTGCTGAGCAA   | NM_001171:               | NM_001171:                                                             |
| 368         | ABCC6    | ATP-binding cassette, sub-family C (CFTR/MRP), member 6          | -1.91         | ACGGTTGACGTGGACATTTCA  | NM_001171:               | NM_001171:                                                             |
| 6833        | ABCC8    | ATP-binding cassette, sub-family C (CFTR/MRP), member 8          | 0.89          | CTAAGTAAATCACTTGTAA    | NM_000352:               | NM_000352:                                                             |
| 6833        | ABCC8    | ATP-binding cassette, sub-family C (CFTR/MRP), member 8          | 1.27          | CAGCGGCACCATCCGATTTAA  | NM_000352:               | NM_000352:                                                             |
| 10060       | ABCC9    | ATP-binding cassette, sub-family C (CFTR/MRP), member 9          | -1.02         | CCCAATTTGTCGCCACAAA    | NM_005691:               | NM_005691:NM_020298:                                                   |
| 10060       | ABCC9    | ATP-binding cassette, sub-family C (CFTR/MRP), member 9          | -1.01         | CTGCATCTATAGATCCGATTA  | NM_005691:               | NM_005691:NM_020298:NM_020297:                                         |
| 215         | ABCD1    | ATP-binding cassette, sub-family D (ALD), member 1               | 0.02          | CTCTTTCTACAGCCTAATTTA  | NM_000033:               | NM_000033:                                                             |
| 215         | ABCD1    | ATP-binding cassette, sub-family D (ALD), member 1               | -0.09         | CCACTCTTTCTACAGCCTAA   | NM_000033:               | NM_000033:                                                             |
| 225         | ABCD2    | ATP-binding cassette, sub-family D (ALD), member 2               | 0.89          | CACCTGAGAATTATAGCCAAT  | NM_005164:               | NM_005164:                                                             |

|       |        |                                                                     |       |                        |            |                                                                                  |
|-------|--------|---------------------------------------------------------------------|-------|------------------------|------------|----------------------------------------------------------------------------------|
| 225   | ABCD2  | ATP-binding cassette, sub-family D (ALD), member 2                  | -0.73 | TGCGCTAGTAGACCACGCCCTA | NM_005164: | NM_005164:                                                                       |
| 225   | ABCD2  | ATP-binding cassette, sub-family D (ALD), member 2                  | 0.85  | CACCTCGAGAATTTATAGCCAA | NM_005164: | NM_005164:                                                                       |
| 225   | ABCD2  | ATP-binding cassette, sub-family D (ALD), member 2                  | 0.08  | TGCGCTAGTAGACCACGCCCTA | NM_005164: | NM_005164:                                                                       |
| 5825  | ABCD3  | ATP-binding cassette, sub-family D (ALD), member 3                  | 0.92  | TCCATAATACATAACATTCAA  | NM_002858: | NM_002858:                                                                       |
| 5825  | ABCD3  | ATP-binding cassette, sub-family D (ALD), member 3                  | -0.48 | AAGGATTTAAATCATGGCAAA  | NM_002858: | NM_002858:                                                                       |
| 5826  | ABCD4  | ATP-binding cassette, sub-family D (ALD), member 4                  | -0.23 | CCCCTTACCCTCGTCTACTA   | NM_005050: | NM_020323:NM_020324:NM_020325:NM_020326:NM_005050:                               |
| 5826  | ABCD4  | ATP-binding cassette, sub-family D (ALD), member 4                  | 0.07  | CCCTACCTTAACCCAAATGAA  | NM_005050: | NM_020323:NM_020324:NM_020325:NM_020326:NM_005050:                               |
| 6059  | ABCE1  | ATP-binding cassette, sub-family E (OABP), member 1                 | -0.20 | CTGATTGCATTTGATAAATA   | NM_002940: | NM_002940:                                                                       |
| 6059  | ABCE1  | ATP-binding cassette, sub-family E (OABP), member 1                 | -1.13 | CCAGTTGGGTTCTAAATGTGA  | NM_002940: | NM_002940:                                                                       |
| 23    | ABCF1  | ATP-binding cassette, sub-family F (GCN20), member 1                | -3.43 | AAGGGAAGGCTAAGCCTCAAAA | NM_001090: | NM_001090:NM_001025091:                                                          |
| 23    | ABCF1  | ATP-binding cassette, sub-family F (GCN20), member 1                | -0.93 | CAGAGTGTTAGCCAAATCGAT  | NM_001090: | NM_001090:NM_001025091:                                                          |
| 10061 | ABCF2  | ATP-binding cassette, sub-family F (GCN20), member 2                | 0.07  | AACTGAAGTATTATACGGGTA  | NM_005692: | NM_005692:NM_007189:                                                             |
| 10061 | ABCF2  | ATP-binding cassette, sub-family F (GCN20), member 2                | 1.11  | TACGGTCTCACTGGGAACAAA  | NM_005692: | NM_005692:NM_007189:                                                             |
| 55324 | ABCF3  | ATP-binding cassette, sub-family F (GCN20), member 3                | -1.46 | CGAGGCTCGACTTAAGGCAAAA | NM_018358: | NM_018358:                                                                       |
| 55324 | ABCF3  | ATP-binding cassette, sub-family F (GCN20), member 3                | -0.90 | TCGGTTGGAATCATCTGGCAAA | NM_018358: | NM_018358:                                                                       |
| 9619  | ABCG1  | ATP-binding cassette, sub-family G (WHITE), member 1                | -4.55 | CTGGTCCGACCCGCATGAA    | NM_004915: | NM_016818:NM_004915:                                                             |
| 9619  | ABCG1  | ATP-binding cassette, sub-family G (WHITE), member 1                | 0.52  | TACGTCCTGAGTCAAGGACAA  | NM_004915: | NM_016818:NM_004915:NM_207174:NM_207627:NM_207628:NM_207629:NM_207630:           |
| 9429  | ABCG2  | ATP-binding cassette, sub-family G (WHITE), member 2                | 2.10  | CTGGTCTAAITTTATTAATCTA | NM_004827: | NM_004827:                                                                       |
| 9429  | ABCG2  | ATP-binding cassette, sub-family G (WHITE), member 2                | 1.16  | CTGGCGAAGAATATTTGGTAA  | NM_004827: | NM_004827:                                                                       |
| 64137 | ABCG4  | ATP-binding cassette, sub-family G (WHITE), member 4                | 0.08  | CTATATTTATACAGATGCAAA  | NM_022169: | NM_022169:                                                                       |
| 64137 | ABCG4  | ATP-binding cassette, sub-family G (WHITE), member 4                | 0.99  | AGCCATGATGGTCTCTGCTAA  | NM_022169: | NM_022169:                                                                       |
| 64240 | ABCG5  | ATP-binding cassette, sub-family G (WHITE), member 5 (sterolin 1)   | -0.92 | GTGCTACTTGGTATCGTCCAA  | NM_022436: | NM_022436:                                                                       |
| 64240 | ABCG5  | ATP-binding cassette, sub-family G (WHITE), member 5 (sterolin 1)   | -1.96 | ACCTTGTCTCAAGCAATTCAA  | NM_022436: | NM_022436:                                                                       |
| 64241 | ABCG8  | ATP-binding cassette, sub-family G (WHITE), member 8 (sterolin 2)   | 0.02  | AAAGCCACGTAAGCAATTA    | NM_022437: | NM_022437:                                                                       |
| 64241 | ABCG8  | ATP-binding cassette, sub-family G (WHITE), member 8 (sterolin 2)   | 0.10  | CACCATCAATACAGAAAGTGA  | NM_022437: | NM_022437:                                                                       |
| 25890 | ABI3BP | ABI gene family, member 3 (NESH) binding protein                    | -1.63 | TGGGAGGAGTTTAATAGTTA   | NM_015429: | NM_015429:                                                                       |
| 25890 | ABI3BP | ABI gene family, member 3 (NESH) binding protein                    | -1.47 | TACTATGTATTTATACGTTAA  | NM_015429: | NM_015429:                                                                       |
| 25    | ABL1   | v-abl Abelson murine leukemia viral oncogene homolog 1              | 1.48  | AACACTCTAAGCAACTAAA    | NM_005157: | NM_005157:NM_007313:                                                             |
| 25    | ABL1   | v-abl Abelson murine leukemia viral oncogene homolog 1              | 0.34  | ACGGCAGGACATCACCATTGAA | NM_005157: | NM_005157:NM_007313:                                                             |
| 27    | ABL2   | v-abl Abelson murine leukemia viral oncogene homolog 2 (arg, Abelsc | -0.07 | AACCTTGCCTTAATAACTTA   | NM_005158: | NM_005158:NM_007314:                                                             |
| 27    | ABL2   | v-abl Abelson murine leukemia viral oncogene homolog 2 (arg, Abelsc | 2.39  | ATCAAGCATCCTAATCTGGTGA | NM_005158: | NM_005158:NM_007314:                                                             |
| 31    | ACACA  | acetyl-Coenzyme A carboxylase alpha                                 | 0.44  | CTGGATAATCTGGTCAATGTA  | NM_000664: | NM_000664:NM_198838:NM_198839:NM_198837:NM_198835:NM_198836:NM_198834:           |
| 31    | ACACA  | acetyl-Coenzyme A carboxylase alpha                                 | -2.15 | TGCGATCACAATTTGGCAATAA | NM_000664: | NM_198835:NM_198836:NM_198834:                                                   |
| 32    | ACACB  | acetyl-Coenzyme A carboxylase beta                                  | -0.54 | AAGGATCGATCCAGCTTACAAA | NM_001093: | NM_001093:                                                                       |
| 32    | ACACB  | acetyl-Coenzyme A carboxylase beta                                  | -1.91 | CCCGCTGTGCATAGAAATGTA  | NM_001093: | NM_001093:                                                                       |
| 80724 | ACAD10 | acyl-Coenzyme A dehydrogenase family, member 10                     | 4.44  | ACAGCACAGAACAAATCATTTA | NM_025247: | NM_025247:                                                                       |
| 80724 | ACAD10 | acyl-Coenzyme A dehydrogenase family, member 10                     | 0.05  | CTGGTGAGGTATGGCACCAGAA | NM_025247: | NM_025247:                                                                       |
| 84129 | ACAD11 | acyl-Coenzyme A dehydrogenase family, member 11                     | -1.47 | CGAGATGAAGATAGCTATGTA  | NM_032169: | NM_032169:                                                                       |
| 84129 | ACAD11 | acyl-Coenzyme A dehydrogenase family, member 11                     | 0.38  | CAGGAGTATATAGCAGATAT   | NM_032169: | NM_032169:                                                                       |
| 33    | ACADL  | acyl-Coenzyme A dehydrogenase, long chain                           | -2.07 | AAGGGACGAAAGCTACATAAA  | NM_001608: | NM_001608:                                                                       |
| 33    | ACADL  | acyl-Coenzyme A dehydrogenase, long chain                           | 0.19  | TAGGTGTTTCATTTATCTCTA  | NM_001608: | NM_001608:                                                                       |
| 34    | ACADM  | acyl-Coenzyme A dehydrogenase, C-4 to C-12 straight chain           | 1.42  | CAACTTGACAGTAACCTTGTA  | NM_000016: | NM_000016:                                                                       |
| 34    | ACADM  | acyl-Coenzyme A dehydrogenase, C-4 to C-12 straight chain           | 2.27  | AAGTACTTCCACAATTCAAA   | NM_000016: | NM_000016:                                                                       |
| 35    | ACADS  | acyl-Coenzyme A dehydrogenase, C-2 to C-3 short chain               | 0.32  | CCAGATCAGATCAGATGGGAA  | NM_000017: | NM_000017:                                                                       |
| 35    | ACADS  | acyl-Coenzyme A dehydrogenase, C-2 to C-3 short chain               | -0.09 | CACGGCCAAACCTCATCTTTGA | NM_000017: | NM_000017:                                                                       |
| 37    | ACADVL | acyl-Coenzyme A dehydrogenase, very long chain                      | -4.41 | ACGGATGTTTATGCTGCAAGTA | NM_000018: | NM_000018:NM_001033859:                                                          |
| 37    | ACADVL | acyl-Coenzyme A dehydrogenase, very long chain                      | -2.07 | AAGCAAGCTTTGGATCAGTAA  | NM_000018: | NM_000018:NM_001033859:                                                          |
| 38    | ACAT1  | acetyl-Coenzyme A acetyltransferase 1 (acetoacetyl Coenzyme A thio  | -2.28 | TAGTGTGTTGATCAGCAAAA   | NM_000019: | NM_000019:                                                                       |
| 38    | ACAT1  | acetyl-Coenzyme A acetyltransferase 1 (acetoacetyl Coenzyme A thio  | -2.28 | CCAGATGTAGTGGTGAAGAAA  | NM_000019: | NM_000019:                                                                       |
| 39    | ACAT2  | acetyl-Coenzyme A acetyltransferase 2 (acetoacetyl Coenzyme A thio  | -0.03 | AAACGTGGGCTTACACCTTTA  | NM_005891: | NM_005891:                                                                       |
| 39    | ACAT2  | acetyl-Coenzyme A acetyltransferase 2 (acetoacetyl Coenzyme A thio  | -0.03 | CGCCATGGGAGCAACATAGAA  | NM_005891: | NM_005891:                                                                       |
| 64746 | ACBD3  | acyl-Coenzyme A binding domain containing 3                         | 0.57  | CAGCTGTTAGTTTCAGAGTTA  | NM_022735: | NM_022735:                                                                       |
| 64746 | ACBD3  | acyl-Coenzyme A binding domain containing 3                         | 1.62  | GAGCATTAGAGTCCAGAGTTA  | NM_022735: | NM_022735:                                                                       |
| 40    | ACCN1  | amiloride-sensitive cation channel 1, neuronal (degenerin)          | -7.24 | CAGCAAGACATCAGCCAAAGTA | NM_001094: | NM_183377:NM_001094:                                                             |
| 40    | ACCN1  | amiloride-sensitive cation channel 1, neuronal (degenerin)          | -0.21 | CACCTGGAAATCAGAAGCTGCA | NM_001094: | NM_001094:                                                                       |
| 41    | ACCN2  | amiloride-sensitive cation channel 2, neuronal                      | 0.58  | AACGAGTTCGCGTTTATGCGAA | NM_001095: | NM_020039:NM_001095:                                                             |
| 41    | ACCN2  | amiloride-sensitive cation channel 2, neuronal                      | 0.66  | CCCTATCTTAAATGAGAGACAA | NM_001095: | NM_020039:NM_001095:                                                             |
| 9311  | ACCN3  | amiloride-sensitive cation channel 3                                | 0.81  | CCCAAATAAAGCTCTAATGCA  | NM_004769: | NM_004769:NM_020321:NM_020322:                                                   |
| 9311  | ACCN3  | amiloride-sensitive cation channel 3                                | 0.02  | CTGGGACGCCATCGAACCCCAA | NM_004769: | NM_004769:NM_020321:                                                             |
| 55515 | ACCN4  | amiloride-sensitive cation channel 4, pituitary                     | 0.23  | CTGTACATTTGTAATATTTTA  | NM_018674: | NM_018674:NM_182847:                                                             |
| 55515 | ACCN4  | amiloride-sensitive cation channel 4, pituitary                     | -4.10 | TAGGACGGTGTGCTGACTGAA  | NM_018674: | NM_018674:NM_182847:                                                             |
| 51802 | ACCN5  | amiloride-sensitive cation channel 5, intestinal                    | 0.00  | AGGAGTGTAAATGGTCACTTA  | NM_017419: | NM_017419:                                                                       |
| 51802 | ACCN5  | amiloride-sensitive cation channel 5, intestinal                    | 0.04  | ATCATAGAATTTATGAAATAT  | NM_017419: | NM_017419:                                                                       |
| 1636  | ACE    | angiotensin I converting enzyme (peptidyl-dipeptidase A) 1          | -3.84 | CAGCGACGAGGATGACATCAA  | NM_000789: | NM_000789:NM_152830:NM_152831:                                                   |
| 1636  | ACE    | angiotensin I converting enzyme (peptidyl-dipeptidase A) 1          | 1.31  | CACCACAGAGGCTATGCTAAA  | NM_000789: | NM_000789:NM_152830:NM_152831:                                                   |
| 59272 | ACE2   | angiotensin I converting enzyme (peptidyl-dipeptidase A) 2          | 0.01  | ATGCTAGATTTACACACTCAA  | NM_021804: | NM_021804:                                                                       |
| 59272 | ACE2   | angiotensin I converting enzyme (peptidyl-dipeptidase A) 2          | -1.25 | ATGGAACGACAAATGAAATGTA | NM_021804: | NM_021804:                                                                       |
| 43    | ACHE   | acetylcholinesterase (Yt blood group)                               | 0.04  | CGCCCTCTGGCTGCAAAATAA  | NM_000665: | NM_015831:NM_000665:                                                             |
| 43    | ACHE   | acetylcholinesterase (Yt blood group)                               | 0.16  | CCGAGGCTTCAGCAAAGACAAA | NM_000665: | NM_015831:NM_000665:                                                             |
| 47    | ACLY   | ATP citrate lyase                                                   | -0.06 | CAGCCAGAACTTGGTAGTCAA  | NM_001096: | NM_198830:NM_001096:                                                             |
| 47    | ACLY   | ATP citrate lyase                                                   | 0.28  | CGAGTGAAGTCGATAAACAAA  | NM_001096: | NM_198830:NM_001096:                                                             |
| 48    | ACQ1   | aconitase 1, soluble                                                | 0.35  | CAGGGCAAGAACACACACTA   | NM_002197: | NM_002197:                                                                       |
| 48    | ACQ1   | aconitase 1, soluble                                                | -0.03 | ATGGGTGTGATCCCACTTGAA  | NM_002197: | NM_002197:                                                                       |
| 51    | ACQX1  | acyl-Coenzyme A oxidase 1, palmitoyl                                | 0.21  | TAGCTATAGAGCAATGATAA   | NM_004035: | NM_004035:NM_007292:                                                             |
| 51    | ACQX1  | acyl-Coenzyme A oxidase 1, palmitoyl                                | 0.27  | CACAAGTAAACCCAGCGTATA  | NM_004035: | NM_004035:NM_007292:                                                             |
| 52    | ACP1   | acid phosphatase 1, soluble                                         | 3.38  | CCCATAGTGCACACTTGTATA  | NM_004300: | NM_007099:NM_004300:NM_177554:                                                   |
| 52    | ACP1   | acid phosphatase 1, soluble                                         | -3.10 | TCGGTAGGAGCTCAGAGCTCA  | NM_004300: | NM_007099:NM_004300:NM_177554:                                                   |
| 53    | ACP2   | acid phosphatase 2, lysosomal                                       | 1.12  | CAGCTGAAAGTCTGGCGAAA   | NM_001610: | NM_001610:                                                                       |
| 53    | ACP2   | acid phosphatase 2, lysosomal                                       | -0.01 | CTGGATGTCTACAATGGTGAA  | NM_001610: | NM_001610:                                                                       |
| 54    | ACP5   | acid phosphatase 5, tartrate resistant                              | 0.23  | CTGGGCAAGTCCCTCTTTTAA  | NM_001611: | NM_001611:                                                                       |
| 54    | ACP5   | acid phosphatase 5, tartrate resistant                              | -1.03 | CTGGTACGTGCTAGCCGGAAA  | NM_001611: | NM_001611:                                                                       |
| 51205 | ACP6   | acid phosphatase 6, lysosphosphatidic                               | -0.30 | CCATGTCAAGTTTATACCTTAA | NM_016361: | NM_016361:                                                                       |
| 51205 | ACP6   | acid phosphatase 6, lysosphosphatidic                               | -1.20 | CCCGCTGGACATGTTCTTAA   | NM_016361: | NM_016361:                                                                       |
| 55    | ACPP   | acid phosphatase, prostate                                          | 4.68  | ACAGATGGCGCTAGATGTTTA  | NM_001099: | NM_001099:                                                                       |
| 55    | ACPP   | acid phosphatase, prostate                                          | 2.03  | CGGACTTTGATGAGTGCTAT   | NM_001099: | NM_001099:                                                                       |
| 93650 | ACPT   | acid phosphatase, testicular                                        | 0.08  | CCCGCAAAGATGGAGGGGAT   | NM_033068: | NM_033068:NM_080791:NM_080790:NM_080791:                                         |
| 93650 | ACPT   | acid phosphatase, testicular                                        | 0.11  | CTGGTGTCTGGCTCTGGTGA   | NM_033068: | NM_033068:NM_080791:                                                             |
| 49    | ACR    | acrosin                                                             | -3.86 | CAGAAGAGATATGTGGAGAAA  | NM_001097: | NM_001097:                                                                       |
| 49    | ACR    | acrosin                                                             | 0.91  | TGGGAACAATAAACAGTAAA   | NM_001097: | NM_001097:                                                                       |
| 56    | ACRV1  | acrosomal vesicle protein 1                                         | -1.22 | CAGGCACAATTAATTTGCT    | NM_001612: | NM_001612:NM_020069:NM_020107:NM_020108:NM_020109:NM_020110:NM_020111:NM_020114: |

|        |             |                                                                     |        |                        |            |                                                                                                              |
|--------|-------------|---------------------------------------------------------------------|--------|------------------------|------------|--------------------------------------------------------------------------------------------------------------|
| 56     | ACRV1       | acrosomal vesicle protein 1                                         | 0.07   | ATGGAACGAGGATGCAAAATTA | NM_001612: | NM_001612:NM_020069:NM_020107:NM_020108:<br>NM_020109:NM_020110:NM_020111:NM_020113:<br>NM_020114:NM_020115: |
| 2182   | ACSL4       | acyl-CoA synthetase long-chain family member 4                      | -2.59  | AAGGGCAGAGTTACTTGATAA  | NM_004458: | NM_004458:NM_022977:                                                                                         |
| 2182   | ACSL4       | acyl-CoA synthetase long-chain family member 4                      | 0.18   | TTGGAGCATATTGAAATCCCA  | NM_004458: | NM_004458:NM_022977:                                                                                         |
| 23305  | ACSL6       | acyl-CoA synthetase long-chain family member 6                      | -0.48  | TTGGAAGATATGGTGAGGTTA  | NM_015256: | NM_015256:NM_001009185:                                                                                      |
| 23305  | ACSL6       | acyl-CoA synthetase long-chain family member 6                      | -0.53  | COGAGTGGGAATCATCAGGAA  | NM_015256: | NM_015256:NM_001009185:                                                                                      |
| 6296   | ACSM3       | acyl-CoA synthetase medium-chain family member 3                    | 0.44   | ATGCTGTACAGAAATGATATA  | NM_005622: | NM_202000:NM_005622:                                                                                         |
| 6296   | ACSM3       | acyl-CoA synthetase medium-chain family member 3                    | -0.11  | CAAGCTGATTGTATCAGAGAA  | NM_005622: | NM_202000:NM_005622:                                                                                         |
| 86     | ACTL6A      | actin-like 6A                                                       | 0.95   | AAAGCTTTAACTGGGCTCTATA | NM_004301: | NM_177989:NM_178042:NM_004301:                                                                               |
| 86     | ACTL6A      | actin-like 6A                                                       | -0.02  | CAACAGTGGAAACGGAGGTTTA | NM_004301: | NM_177989:NM_178042:NM_004301:                                                                               |
| 51412  | ACTL6B      | actin-like 6B                                                       | 0.23   | CAACAGCACCATTGGAGCGCAA | NM_016188: | NM_016188:                                                                                                   |
| 51412  | ACTL6B      | actin-like 6B                                                       | 0.81   | CTGGCATAACTACATGTGTAA  | NM_016188: | NM_016188:                                                                                                   |
| 87     | ACTN1       | actinin, alpha 1                                                    | 0.69   | GACCATTATGATTCTCAGCAA  | NM_001102: | NM_001102:                                                                                                   |
| 87     | ACTN1       | actinin, alpha 1                                                    | 0.59   | GCGCACCATCATGGACCATTA  | NM_001102: | NM_001102:                                                                                                   |
| 81     | ACTN4       | actinin, alpha 4                                                    | -3.62  | ACGCAGCATCGTGGACTACAA  | NM_004924: | NM_004924:                                                                                                   |
| 81     | ACTN4       | actinin, alpha 4                                                    | 1.90   | CCCGAAATCATCAACTCCAA   | NM_004924: | NM_004924:                                                                                                   |
| 10097  | ACTR2       | ARP2 actin-related protein 2 homolog (yeast)                        | -0.05  | CAAGTITTTATGACTGGTGTA  | NM_005722: | NM_001005386:NM_005722:                                                                                      |
| 10097  | ACTR2       | ARP2 actin-related protein 2 homolog (yeast)                        | 0.23   | CCAGATGGACGATCATCAAA   | NM_005722: | NM_001005386:NM_005722:                                                                                      |
| 10096  | ACTR3       | ARP3 actin-related protein 3 homolog (yeast)                        | 0.20   | ATCGATGTGGTTATGAGAGA   | NM_005721: | NM_005721:                                                                                                   |
| 10096  | ACTR3       | ARP3 actin-related protein 3 homolog (yeast)                        | 0.01   | CCGGCTGAAATTAAGTGAGGA  | NM_005721: | NM_005721:                                                                                                   |
| 90     | ACVR1       | activin A receptor, type I                                          | -0.33  | CGGATGGTGACGAATGGTATA  | NM_001105: | NM_001105:                                                                                                   |
| 90     | ACVR1       | activin A receptor, type I                                          | 1.26   | CTGGTCTGTCTTGGATAATA   | NM_001105: | NM_001105:                                                                                                   |
| 91     | ACVR1B      | activin A receptor, type IB                                         | 0.97   | CCGTTCTTACGTGGCCATAAA  | NM_004302: | NM_004302:                                                                                                   |
| 91     | ACVR1B      | activin A receptor, type IB                                         | -1.50  | CTGTGATTACCTCTCAATCTA  | NM_004302: | NM_004302:                                                                                                   |
| 130399 | ACVR1C      | activin A receptor, type IC                                         | 0.86   | TACTTTGGTAAACGAGATTTA  | NM_145259: | NM_145259:                                                                                                   |
| 130399 | ACVR1C      | activin A receptor, type IC                                         | 0.30   | CACAGAGTAAATGATTTTAA   | NM_145259: | NM_145259:                                                                                                   |
| 92     | ACVR2A      | activin A receptor, type IIA                                        | 2.56   | GAGGTATTAGAGGGTGCTATA  | NM_001616: | NM_001616:                                                                                                   |
| 92     | ACVR2A      | activin A receptor, type IIA                                        | -1.05  | TCCACGGTTGTAATAATATA   | NM_001616: | NM_001616:                                                                                                   |
| 93     | ACVR2B      | activin A receptor, type IIB                                        | 0.00   | CAGCTCATGAATGACTTTGTA  | NM_001106: | NM_001106:                                                                                                   |
| 93     | ACVR2B      | activin A receptor, type IIB                                        | 2.81   | TACGGTCATGTGACATCCAT   | NM_001106: | NM_001106:                                                                                                   |
| 94     | ACVRL1      | activin A receptor type II-like 1                                   | 1.63   | CACCGAGTTCGTCAACCACCTA | NM_000020: | NM_000020:                                                                                                   |
| 94     | ACVRL1      | activin A receptor type II-like 1                                   | 1.57   | CAGGAAGACGCTGGAATAAGA  | NM_000020: | NM_000020:                                                                                                   |
| 100    | ADA         | (adenosin) adenosine deaminase                                      | -0.87  | ATGGGCATGGTGAATCTGAA   | NM_000022: | NM_000022:                                                                                                   |
| 100    | ADA         | (adenosin) adenosine deaminase                                      | -1.17  | CATGATCTCAATAGTCAGTTA  | NM_000022: | NM_000022:                                                                                                   |
| 161823 | ADAL        | adenosine deaminase-like                                            | 1.93   | TAGGATTTGATAGCAGTTGA   | XM_091156: | NM_001012969:                                                                                                |
| 102    | ADAM10      | ADAM metalloproteinase domain 10                                    | -0.81  | ATGGGACACATGAGACGCTAA  | NM_001110: | NM_001110:                                                                                                   |
| 102    | ADAM10      | ADAM metalloproteinase domain 10                                    | -0.39  | ACCAAACCTCACAGACTGTAA  | NM_001110: | NM_001110:                                                                                                   |
| 4185   | ADAM11      | ADAM metalloproteinase domain 11                                    | 0.02   | AAGTATGAGTGCTGATTCAAA  | NM_002390: | NM_002390:                                                                                                   |
| 4185   | ADAM11      | ADAM metalloproteinase domain 11                                    | -3.72  | CTGGCCGATGTGATATACAA   | NM_002390: | NM_002390:                                                                                                   |
| 8038   | ADAM12      | ADAM metalloproteinase domain 12 (meltrin alpha)                    | -0.12  | CAAGGCTTTAAAGTGACTAA   | NM_003474: | NM_003474:                                                                                                   |
| 8038   | ADAM12      | ADAM metalloproteinase domain 12 (meltrin alpha)                    | 0.15   | AAGCGGTGCTGTAGAGAAAT   | NM_003474: | NM_003474:                                                                                                   |
| 8751   | ADAM15      | ADAM metalloproteinase domain 15 (metargidin)                       | -0.47  | CTGGTGTGTATAGACCATCGA  | NM_003815: | NM_207191:NM_207194:NM_207196:NM_207197:<br>NM_207195:NM_003815:                                             |
| 8751   | ADAM15      | ADAM metalloproteinase domain 15 (metargidin)                       | 0.59   | CTGACGGACCCCTGTTGTCAAA | NM_003815: | NM_207191:NM_207194:NM_207196:NM_207197:<br>NM_207195:NM_003815:                                             |
| 6868   | ADAM17      | ADAM metalloproteinase domain 17 (tumor necrosis factor, alpha, con | -3.29  | AAGAACACAGAGTGCTAATTTA | NM_003183: | NM_003183:                                                                                                   |
| 6868   | ADAM17      | ADAM metalloproteinase domain 17 (tumor necrosis factor, alpha, con | -1.22  | CAGGATGTAATGAACGATTTT  | NM_003183: | NM_003183:                                                                                                   |
| 8749   | ADAM18      | ADAM metalloproteinase domain 18                                    | 0.97   | AGGATGACGTGGGACATTTAA  | NM_014237: | NM_014237:                                                                                                   |
| 8749   | ADAM18      | ADAM metalloproteinase domain 18                                    | -1.94  | CTGGACCATGTTGATACATCAA | NM_014237: | NM_014237:                                                                                                   |
| 8728   | ADAM19      | ADAM metalloproteinase domain 19 (meltrin beta)                     | 1.10   | TACCTCGTGGCTGATATTTAA  | NM_023038: | NM_023038:NM_033274:                                                                                         |
| 8728   | ADAM19      | ADAM metalloproteinase domain 19 (meltrin beta)                     | -0.04  | CACCTTATTTACAGATCTGAA  | NM_023038: | NM_023038:NM_033274:                                                                                         |
| 2515   | ADAM2       | ADAM metalloproteinase domain 2 (fertilin beta)                     | -0.36  | AACCATATACTGGAATTTAA   | NM_001464: | NM_001464:                                                                                                   |
| 2515   | ADAM2       | ADAM metalloproteinase domain 2 (fertilin beta)                     | 1.94   | TGCTATAATGGTAAAGTTAA   | NM_001464: | NM_001464:                                                                                                   |
| 8748   | ADAM20 (AD  | ADAM metalloproteinase domain 20                                    | 0.75   | TTGGTCACTGTGGTATTGTA   | NM_003814: | NM_003814:                                                                                                   |
| 8748   | ADAM20 (AD  | ADAM metalloproteinase domain 20                                    | 0.65   | ACGTGTAATAACCATGATATA  | NM_003814: | NM_003814:                                                                                                   |
| 53616  | ADAM22      | ADAM metalloproteinase domain 22                                    | -0.01  | TGGGTCTAATTCACCTGAGTA  | NM_004194: | NM_004194:NM_021721:NM_021722:<br>NM_004194:NM_021721:NM_021722:NM_021723:                                   |
| 53616  | ADAM22      | ADAM metalloproteinase domain 22                                    | -1.03  | CGGCGGAATGTGCTCTGAA    | NM_004194: | NM_016351:                                                                                                   |
| 8745   | ADAM23      | ADAM metalloproteinase domain 23                                    | -0.64  | GACGGATATGCATGAATCAA   | NM_003812: | NM_003812:                                                                                                   |
| 8745   | ADAM23      | ADAM metalloproteinase domain 23                                    | -0.13  | CGGGGTGACATTTCACTATA   | NM_003812: | NM_003812:                                                                                                   |
| 10863  | ADAM28      | ADAM metalloproteinase domain 28                                    | 0.13   | CACACTAATCTGGAGGAATA   | NM_014265: | NM_014265:                                                                                                   |
| 10863  | ADAM28      | ADAM metalloproteinase domain 28                                    | 0.93   | AAGAATAATCTCCGAAGTTAA  | NM_014265: | NM_014265:                                                                                                   |
| 11086  | ADAM29      | ADAM metalloproteinase domain 29                                    | 0.13   | CACAGGCACTGTGCCATATA   | NM_014269: | NM_014269:                                                                                                   |
| 11086  | ADAM29      | ADAM metalloproteinase domain 29                                    | 0.89   | ACCGTAGTTGTGCAATTTGTA  | NM_014269: | NM_014269:                                                                                                   |
| 11085  | ADAM30      | ADAM metalloproteinase domain 30                                    | -0.11  | TACCATGCTATTCAAGTATA   | NM_021794: | NM_021794:                                                                                                   |
| 11085  | ADAM30      | ADAM metalloproteinase domain 30                                    | -0.27  | AAGATCGGTGTTGCCAATCAA  | NM_021794: | NM_021794:                                                                                                   |
| 80332  | ADAM33      | ADAM metalloproteinase domain 33                                    | 0.34   | CAGAGGAACCATTTAAGAAA   | NM_025220: | NM_153202:NM_025220:                                                                                         |
| 80332  | ADAM33      | ADAM metalloproteinase domain 33                                    | 0.04   | CGGGTCAAGCCAGGACGCCAA  | NM_025220: | NM_153202:NM_025220:                                                                                         |
| 8756   | ADAM7       | ADAM metalloproteinase domain 7                                     | -12.29 | TGCAACGCTTTTACAACCTTA  | NM_003817: | NM_003817:                                                                                                   |
| 8756   | ADAM7       | ADAM metalloproteinase domain 7                                     | 0.59   | CTGGTATTGTGGTATCGGGA   | NM_003817: | NM_003817:                                                                                                   |
| 101    | ADAM8       | ADAM metalloproteinase domain 8                                     | 0.11   | CCCAGCTTTGTGTGTTTAA    | NM_001109: | NM_001109:                                                                                                   |
| 101    | ADAM8       | ADAM metalloproteinase domain 8                                     | 0.74   | AGGCATCATCGTCAACGCCAA  | NM_001109: | NM_001109:                                                                                                   |
| 8754   | ADAM9       | ADAM metalloproteinase domain 9 (meltrin gamma)                     | 1.36   | ACCTTAGTTATCATTAATGTA  | NM_003816: | NM_003816:NM_001005845:                                                                                      |
| 8754   | ADAM9       | ADAM metalloproteinase domain 9 (meltrin gamma)                     | -1.37  | TTCTACCTTAGTTATCATTTAA | NM_003816: | NM_003816:NM_001005845:                                                                                      |
| 27299  | ADAMDEC1    | ADAM-like, decysin 1                                                | -0.25  | CGGCTAAACTATTCAGAGTTA  | NM_014479: | NM_014479:                                                                                                   |
| 27299  | ADAMDEC1    | ADAM-like, decysin 1                                                | -0.27  | AGCCCTAACGTTAAACCTGAA  | NM_014479: | NM_014479:                                                                                                   |
| 9510   | ADAMTS1     | ADAM metalloproteinase with thrombospondin type 1 motif, 1          | 0.58   | CAGCAACGTGAAATAACGCCAA | NM_006988: | NM_006988:                                                                                                   |
| 9510   | ADAMTS1     | ADAM metalloproteinase with thrombospondin type 1 motif, 1          | -4.85  | CTGAGCAGTGATATAGCATAA  | NM_006988: | NM_006988:                                                                                                   |
| 81794  | ADAMTS10    | ADAM metalloproteinase with thrombospondin type 1 motif, 10         | -0.45  | CCGGAAGTATTATTGGGAA    | NM_030957: | NM_030957:                                                                                                   |
| 81794  | ADAMTS10    | ADAM metalloproteinase with thrombospondin type 1 motif, 10         | -0.50  | ACCGAATTAATGCATCTCTCAT | NM_030957: | NM_030957:                                                                                                   |
| 81792  | ADAMTS12 (i | ADAM metalloproteinase with thrombospondin type 1 motif, 12         | 0.01   | CAGGAAGACGGCAAAACCGTA  | NM_030955: | NM_030955:                                                                                                   |
| 81792  | ADAMTS12 (i | ADAM metalloproteinase with thrombospondin type 1 motif, 12         | -0.68  | CCGGAGAGTTCTGAAACCCAAA | NM_030955: | NM_030955:                                                                                                   |
| 140766 | ADAMTS14    | ADAM metalloproteinase with thrombospondin type 1 motif, 14         | -5.27  | CCGCTTGATCATGGTGGGCTA  | NM_080722: | NM_139155:NM_080722:                                                                                         |
| 140766 | ADAMTS14    | ADAM metalloproteinase with thrombospondin type 1 motif, 14         | -1.12  | CAGGAGTGTGTACACTGGGA   | NM_080722: | NM_080722:                                                                                                   |
| 170689 | ADAMTS15    | ADAM metalloproteinase with thrombospondin type 1 motif, 15         | 0.73   | CTCCAAAGAGATTCGACAAA   | NM_139055: | NM_139055:                                                                                                   |
| 170689 | ADAMTS15    | ADAM metalloproteinase with thrombospondin type 1 motif, 15         | 0.79   | CGGCGCGGACCTGGAACATTA  | NM_139055: | NM_139055:                                                                                                   |
| 170691 | ADAMTS17    | ADAM metalloproteinase with thrombospondin type 1 motif, 17         | 1.15   | CAGGCACTCTATGCAAAACAA  | NM_139057: | NM_139057:                                                                                                   |
| 170691 | ADAMTS17    | ADAM metalloproteinase with thrombospondin type 1 motif, 17         | 0.14   | AACGACAGTGACTGCCCTCAA  | NM_139057: | NM_139057:                                                                                                   |
| 9509   | ADAMTS2     | ADAM metalloproteinase with thrombospondin type 1 motif, 2          | -5.26  | CAGGCGAATGGGACCATGTA   | NM_014244: | NM_014244:                                                                                                   |
| 9509   | ADAMTS2     | ADAM metalloproteinase with thrombospondin type 1 motif, 2          | -1.34  | CGCGCGGAGGCTGGACCACAA  | NM_014244: | NM_014244:                                                                                                   |
| 9508   | ADAMTS3     | ADAM metalloproteinase with thrombospondin type 1 motif, 3          | -0.20  | TAGGCAATTCAGATAGTAA    | NM_014243: | NM_014243:                                                                                                   |
| 9508   | ADAMTS3     | ADAM metalloproteinase with thrombospondin type 1 motif, 3          | 0.10   | AACAATGTGATACGTAAATTA  | NM_014243: | NM_014243:                                                                                                   |
| 9507   | ADAMTS4     | ADAM metalloproteinase with thrombospondin type 1 motif, 4          | -1.62  | AAGAAGTATGATTAACACTCAA | NM_005099: | NM_005099:                                                                                                   |
| 9507   | ADAMTS4     | ADAM metalloproteinase with thrombospondin type 1 motif, 4          | -1.81  | ACAGATGTGGTGGATCCTAA   | NM_005099: | NM_005099:                                                                                                   |
| 11096  | ADAMTS5     | ADAM metalloproteinase with thrombospondin type 1 motif, 5 (aggre   | -1.43  | AAGCACTTGATTGACCCGTA   | NM_007038: | NM_007038:                                                                                                   |
| 11096  | ADAMTS5     | ADAM metalloproteinase with thrombospondin type 1 motif, 5 (aggre   | 0.07   | CAGTGTGACCTTGAACATATA  | NM_007038: | NM_007038:                                                                                                   |
| 11173  | ADAMTS7     | ADAM metalloproteinase with thrombospondin type 1 motif, 7          | -1.65  | CCCGGAGAAGTACTTCTCTCAA | NM_014272: | NM_014272:                                                                                                   |
| 11173  | ADAMTS7     | ADAM metalloproteinase with thrombospondin type 1 motif, 7          | -1.66  | CTGCATCAACGGCATCTGTAA  | NM_014272: | NM_014272:                                                                                                   |

|        |           |                                                                        |       |                       |            |                                              |
|--------|-----------|------------------------------------------------------------------------|-------|-----------------------|------------|----------------------------------------------|
| 11095  | ADAMTS8   | ADAM metalloproteinase with thrombospondin type 1 motif, 8             | -0.26 | CAGCATCAAGAATTCATCAA  | NM_007037: | NM_007037:                                   |
| 11095  | ADAMTS8   | ADAM metalloproteinase with thrombospondin type 1 motif, 8             | -1.59 | CCGGGAAGGAAGTATAAATAA | NM_007037: | NM_007037:                                   |
| 56999  | ADAMTS9   | ADAM metalloproteinase with thrombospondin type 1 motif, 9             | 0.24  | CACGACAATGTGATACCTTA  | NM_020249: | NM_182920:                                   |
| 56999  | ADAMTS9   | ADAM metalloproteinase with thrombospondin type 1 motif, 9             | -0.54 | AGGACGTAGAATGAAATTTAA | NM_020249: | NM_182920:                                   |
| 103    | ADAR      | adenosine deaminase, RNA-specific                                      | -0.70 | TCCCTCGATAACAGTCAGCTA | NM_001111: | NM_015840:NM_001111:NM_015841:NM_0010251:07: |
| 103    | ADAR      | adenosine deaminase, RNA-specific                                      | 0.14  | TTCCGTTACCGCAGGGATCTA | NM_001111: | NM_015840:NM_001111:NM_015841:NM_0010251:07: |
| 104    | ADARB1    | adenosine deaminase, RNA-specific, B1 (RED1 homolog rat)               | 0.38  | CAGGATGGAAGTAGAATGATT | NM_001112: | NM_001033049:NM_015833:NM_001112:            |
| 104    | ADARB1    | adenosine deaminase, RNA-specific, B1 (RED1 homolog rat)               | 1.46  | CACAACCTTGAGCTTACTTAA | NM_001112: | NM_001033049:NM_015833:NM_015833:NM_001112:  |
| 113451 | ADC       | arginine decarboxylase                                                 | -1.63 | TAGTCAAGTATGCAACATAA  | NM_052998: | NM_052998:                                   |
| 113451 | ADC       | arginine decarboxylase                                                 | 0.63  | CACCTCCAAGACCATCGTGTA | NM_052998: | NM_052998:                                   |
| 57143  | ADCK1     | aarF domain containing kinase 1                                        | 1.20  | TAACAAGTACTTGGACCCTAA | NM_020421: | NM_020421:                                   |
| 57143  | ADCK1     | aarF domain containing kinase 1                                        | -0.11 | TACGACGGCTGTCTCAGTTA  | NM_020421: | NM_020421:                                   |
| 90956  | ADCK2     | aarF domain containing kinase 2                                        | 0.94  | CAGATTGACCTGCGTACGAA  | NM_052853: | NM_052853:                                   |
| 90956  | ADCK2     | aarF domain containing kinase 2                                        | 0.10  | CCGGAATGTGAAGCCGTCAA  | NM_052853: | NM_052853:                                   |
| 79934  | ADCK4     | aarF domain containing kinase 4                                        | -1.52 | CAGATGCTGAGAGTCTTGAA  | NM_024876: | NM_024876:                                   |
| 79934  | ADCK4     | aarF domain containing kinase 4                                        | -1.05 | CCGGTCCCAGCCGTGGTTAA  | NM_024876: | NM_024876:                                   |
| 203054 | ADCK5     | aarF domain containing kinase 5                                        | -1.57 | AAGGCCTTTGOTGAGCAGATA | NM_174922: | NM_174922:                                   |
| 203054 | ADCK5     | aarF domain containing kinase 5                                        | -9.11 | CCGCTACTTCTTATGGCTAA  | NM_174922: | NM_174922:                                   |
| 107    | ADCY1     | (aden adenylate cyclase 1 (brain))                                     | 0.46  | CTGGAAGTCACTGCGTGAAA  | NM_021116: | NM_021116:                                   |
| 107    | ADCY1     | (aden adenylate cyclase 1 (brain))                                     | -0.21 | CAGGCACTTATTGAGAAATTA | NM_021116: | NM_021116:                                   |
| 108    | ADCY2     | adenylate cyclase 2 (brain)                                            | 0.27  | CACCTGTGCGAGAAATATCAA | NM_020546: | NM_020546:                                   |
| 108    | ADCY2     | adenylate cyclase 2 (brain)                                            | 0.33  | AAGGATGATTCAAGCAATTGA | NM_020546: | NM_020546:                                   |
| 109    | ADCY3     | adenylate cyclase 3                                                    | 0.23  | ACAGGTATTGATAAAGAACAA | NM_004036: | NM_004036:                                   |
| 109    | ADCY3     | adenylate cyclase 3                                                    | -0.21 | CAGACGTATGATGAGATTGGA | NM_004036: | NM_004036:                                   |
| 196883 | ADCY4     | (aden adenylate cyclase 4)                                             | 1.45  | CTCGCTTCTAAGAACCCTCAA | NM_139247: | NM_139247:                                   |
| 196883 | ADCY4     | (aden adenylate cyclase 4)                                             | -0.26 | CCGTAGTAGCTGGAGTTATT  | NM_139247: | NM_139247:                                   |
| 111    | ADCY5     | (aden adenylate cyclase 5)                                             | -0.98 | CCAGGTCCACCAGACATGTA  | NM_183357: | NM_183357:                                   |
| 111    | ADCY5     | (aden adenylate cyclase 5)                                             | -0.08 | CGCCATAGACTTCTCAACAA  | NM_183357: | NM_183357:                                   |
| 112    | ADCY6     | adenylate cyclase 6                                                    | -0.90 | ACGATGATTTCAGTAAATA   | NM_015270: | NM_015270:NM_020983:                         |
| 112    | ADCY6     | adenylate cyclase 6                                                    | -1.51 | CAGCCTGAGCTAGCATGTTT  | NM_015270: | NM_015270:NM_020983:                         |
| 113    | ADCY7     | adenylate cyclase 7                                                    | 0.97  | TCAGATAAATAGTTTGTAA   | NM_001114: | NM_001114:                                   |
| 113    | ADCY7     | adenylate cyclase 7                                                    | 0.10  | CTGTTTCAATGAATACTAT   | NM_001114: | NM_001114:                                   |
| 114    | ADCY8     | adenylate cyclase 8 (brain)                                            | 0.47  | GAAGCATAATCGAAACTTA   | NM_001115: | NM_001115:                                   |
| 114    | ADCY8     | adenylate cyclase 8 (brain)                                            | 1.96  | TGGGATCATCCATCGCTA    | NM_001115: | NM_001115:                                   |
| 115    | ADCY9     | (aden adenylate cyclase 9)                                             | 0.55  | ATCGGAGAGGAAATCCAA    | NM_001116: | NM_001116:                                   |
| 115    | ADCY9     | (aden adenylate cyclase 9)                                             | -2.53 | CAGAGGACCCGTAATGTCAA  | NM_001116: | NM_001116:                                   |
| 117    | ADCYAP1R1 | adenylate cyclase activating polypeptide 1 (pituitary) receptor type I | -3.51 | AAGCTGGAAGGTGAACCGTTA | NM_001118: | NM_001118:                                   |
| 117    | ADCYAP1R1 | adenylate cyclase activating polypeptide 1 (pituitary) receptor type I | 0.34  | TACGCTGAGACTACTTTGA   | NM_001118: | NM_001118:                                   |
| 118    | ADD1      | adducin 1 (alpha)                                                      | 0.58  | CCTAGTTGTGATCAAAAGTAA | NM_001119: | NM_176801:NM_001119:NM_014190:NM_014189:     |
| 118    | ADD1      | adducin 1 (alpha)                                                      | -7.43 | CAGCGATGGGCTCCAGGCAG  | NM_001119: | NM_176801:NM_001119:NM_014190:NM_014189:     |
| 123    | ADFP      | adipose differentiation-related protein                                | 0.64  | CTGCAGGATGAGCCAGTTAAA | NM_001122: | NM_001122:                                   |
| 123    | ADFP      | adipose differentiation-related protein                                | -0.14 | TCCGTTGCAGTTGATCCACAA | NM_001122: | NM_001122:                                   |
| 124    | ADH1A     | alcohol dehydrogenase 1A (class I), alpha polypeptide                  | 0.03  | AGAAATGGAAATGATGTAA   | NM_000667: | NM_000667:                                   |
| 124    | ADH1A     | alcohol dehydrogenase 1A (class I), alpha polypeptide                  | -1.94 | CAGGTTACCTGACGAGGAA   | NM_000667: | NM_000667:                                   |
| 125    | ADH1B     | alcohol dehydrogenase 1B (class I), beta polypeptide                   | -2.67 | AAGACCTTAGACATAAAGTAA | NM_000668: | NM_000668:                                   |
| 125    | ADH1B     | alcohol dehydrogenase 1B (class I), beta polypeptide                   | 1.43  | AAGCCTCAATTAATAATGTA  | NM_000668: | NM_000668:                                   |
| 126    | ADH1C     | alcohol dehydrogenase 1C (class I), gamma polypeptide                  | 0.40  | ACTGGATGCATTAATAACAAA | NM_000669: | NM_000669:                                   |
| 126    | ADH1C     | alcohol dehydrogenase 1C (class I), gamma polypeptide                  | 0.77  | GGGAAATTTTGTCAAGCAA   | NM_000669: | NM_000669:                                   |
| 127    | ADH4      | alcohol dehydrogenase 4 (class II), pi polypeptide                     | 0.43  | TGGCCGTACTATAAATGGAA  | NM_000670: | NM_000670:                                   |
| 127    | ADH4      | alcohol dehydrogenase 4 (class II), pi polypeptide                     | 0.77  | AACCAGTACTTCTCTCAGTA  | NM_000670: | NM_000670:                                   |
| 128    | ADH5      | alcohol dehydrogenase 5 (class III), chi polypeptide                   | 0.08  | CTGGGTGTTACCTAAGACGTA | NM_000671: | NM_000671:                                   |
| 128    | ADH5      | alcohol dehydrogenase 5 (class III), chi polypeptide                   | 1.58  | TACGGGAAGTACCATAATTTA | NM_000671: | NM_000671:                                   |
| 130    | ADH6      | alcohol dehydrogenase 6 (class V)                                      | 0.54  | AAGCTGTACTGATAATTTGA  | NM_000672: | NM_000672:                                   |
| 130    | ADH6      | alcohol dehydrogenase 6 (class V)                                      | -0.53 | CAGGACGTTCTTTGAAGGGTT | NM_000672: | NM_000672:                                   |
| 131    | ADH7      | alcohol dehydrogenase 7 (class IV), mu or sigma polypeptide            | 0.24  | AACGATTAAGAAATCATATTA | NM_000673: | NM_000673:                                   |
| 131    | ADH7      | alcohol dehydrogenase 7 (class IV), mu or sigma polypeptide            | 0.98  | CAGATATAGCGTATAAAGATA | NM_000673: | NM_000673:                                   |
| 9370   | ADIPOQ    | adiponectin, C1Q and collagen domain containing                        | 0.61  | CACGCTTCCACAGTACCCTTA | NM_004797: | NM_004797:                                   |
| 9370   | ADIPOQ    | adiponectin, C1Q and collagen domain containing                        | -0.90 | CTGGGAGCTGTTCTACTGCTA | NM_004797: | NM_004797:                                   |
| 51094  | ADIPOR1   | adiponectin receptor 1                                                 | -1.26 | CAGAAGAGACTGGCATTCAA  | NM_015999: | NM_015999:                                   |
| 51094  | ADIPOR1   | adiponectin receptor 1                                                 | -0.22 | AAGGACACGACTACTGCTCA  | NM_015999: | NM_015999:                                   |
| 79602  | ADIPOR2   | adiponectin receptor 2                                                 | -0.28 | TGGCTCTCCTTGAATAAGAA  | NM_024551: | NM_024551:                                   |
| 79602  | ADIPOR2   | adiponectin receptor 2                                                 | 1.44  | TAGGTTGTCATTTGCTTTTGA | NM_024551: | NM_024551:                                   |
| 132    | ADK       | adenosine kinase                                                       | 0.44  | AAGGGTATGGTAATGCTTGT  | NM_001123: | NM_001123:NM_006721:                         |
| 132    | ADK       | adenosine kinase                                                       | -0.02 | TAGTTTGATAGTGCACCTTAA | NM_001123: | NM_001123:NM_006721:                         |
| 133    | ADM       | adrenomedullin                                                         | -0.02 | CTGTATAATCTATTACATAA  | NM_001124: | NM_001124:                                   |
| 133    | ADM       | adrenomedullin                                                         | 0.35  | ACCGAGTCTCTGTATAATCTA | NM_001124: | NM_001124:                                   |
| 79924  | ADM2      | adrenomedullin 2                                                       | -1.98 | TAGCGAACACTGAGCATTTAA | NM_024866: | NM_024866:                                   |
| 79924  | ADM2      | adrenomedullin 2                                                       | -0.92 | CTGGTACGTCAGGAGCCTTAA | NM_024866: | NM_024866:                                   |
| 11318  | ADMR      | adrenomedullin receptor                                                | 0.76  | CCCTCTCATCAGACTTCTCAA | NM_007264: | NM_007264:                                   |
| 11318  | ADMR      | adrenomedullin receptor                                                | -0.68 | CCGCTTCACTCACTACTTCTA | NM_007264: | NM_007264:                                   |
| 134    | ADORA1    | adenosine A1 receptor                                                  | 1.00  | CAGCATGGAGTACATGGTCTA | NM_000674: | NM_000674:                                   |
| 134    | ADORA1    | adenosine A1 receptor                                                  | -0.53 | GAGGCCATGTGACTAATAAAA | NM_000674: | NM_000674:                                   |
| 135    | ADORA2A   | adenosine A2a receptor                                                 | -0.52 | CAGCATGAGGCCAGGAAGAA  | NM_000675: | NM_000675:                                   |
| 135    | ADORA2A   | adenosine A2a receptor                                                 | -0.52 | CAGGAGTGTCTGATGATTCA  | NM_000675: | NM_000675:                                   |
| 136    | ADORA2B   | adenosine A2b receptor                                                 | 0.68  | AAGGATTGACAAATATATTTA | NM_000676: | NM_000676:                                   |
| 136    | ADORA2B   | adenosine A2b receptor                                                 | 0.34  | ACGTATCTAGCTAATATGTAT | NM_000676: | NM_000676:                                   |
| 140    | ADORA3    | adenosine A3 receptor                                                  | 1.62  | AAGCGTCAACTCGTGAAGAA  | NM_000677: | NM_000677:                                   |
| 140    | ADORA3    | adenosine A3 receptor                                                  | -3.10 | TGGGAACAACCTGACTGTCAA | NM_000677: | NM_000677:                                   |
| 140    | ADORA3    | adenosine A3 receptor                                                  | -1.28 | CACGGCTCTGCCACTCTGCAA | NM_020683: | NM_020683:                                   |
| 140    | ADORA3    | adenosine A3 receptor                                                  | 0.56  | CTCGGCTGTCCTGACTCCAAA | NM_020683: | NM_020683:                                   |
| 148    | ADRA1A    | adrenergic, alpha-1A-, receptor                                        | 1.38  | AAGACGATGGCGTTGTGAA   | NM_000680: | NM_000680:NM_033304:NM_033302:NM_033303:     |
| 148    | ADRA1A    | adrenergic, alpha-1A-, receptor                                        | -1.82 | CCCGTGGATCTGCCAGGATTA | NM_000680: | NM_000680:NM_033304:NM_033302:NM_033303:     |
| 147    | ADRA1B    | adrenergic, alpha-1B-, receptor                                        | 0.73  | CCGTGCTATATAGTGGCCAA  | NM_000679: | NM_000679:                                   |
| 147    | ADRA1B    | adrenergic, alpha-1B-, receptor                                        | 0.29  | GAGGCGGACTCTAAGATGAA  | NM_000679: | NM_000679:                                   |
| 146    | ADRA1D    | adrenergic, alpha-1D-, receptor                                        | -0.80 | CTACGGGAGCCGATATTTAA  | NM_000678: | NM_000678:                                   |
| 146    | ADRA1D    | adrenergic, alpha-1D-, receptor                                        | -1.14 | TTGGCCGACTACAGCAACCTA | NM_000678: | NM_000678:                                   |
| 150    | ADRA2A    | adrenergic, alpha-2A-, receptor                                        | 0.05  | CAAGGCTTGGTGGGAGATCTA | NM_000681: | NM_000681:                                   |
| 150    | ADRA2A    | adrenergic, alpha-2A-, receptor                                        | -0.94 | CTCCCGCGCTTGAATAATAA  | NM_000681: | NM_000681:                                   |
| 151    | ADRA2B    | adrenergic, alpha-2B-, receptor                                        | 0.06  | AAGGTCTGAGTTATTACGCTA | NM_000682: | NM_000682:                                   |
| 151    | ADRA2B    | adrenergic, alpha-2B-, receptor                                        | 0.00  | CTGAGTTATTACGCTACATGA | NM_000682: | NM_000682:                                   |
| 152    | ADRA2C    | adrenergic, alpha-2C-, receptor                                        | 0.53  | AAGTTTTTAAATTTTGGCAA  | NM_000683: | NM_000683:                                   |
| 152    | ADRA2C    | adrenergic, alpha-2C-, receptor                                        | 0.23  | CAGGAGCTTGGCAGAGAGATA | NM_000683: | NM_000683:                                   |

|        |                                                           |                                                                          |       |                        |            |                                          |
|--------|-----------------------------------------------------------|--------------------------------------------------------------------------|-------|------------------------|------------|------------------------------------------|
| 153    | ADRB1                                                     | adrenergic, beta-1-, receptor                                            | 0.46  | CGATAGCAGGTGAACCTGAA   | NM_000684: | NM_000684:                               |
| 153    | ADRB1                                                     | adrenergic, beta-1-, receptor                                            | 0.38  | CGCCTCTCTCGTCTTCTGAA   | NM_000684: | NM_000684:                               |
| 154    | ADRB2                                                     | adrenergic, beta-2-, receptor, surface                                   | 0.55  | CGAGCAAAAGGTCTAAAGTTT  | NM_000024: | NM_000024:                               |
| 154    | ADRB2                                                     | adrenergic, beta-2-, receptor, surface                                   | -0.60 | GAGGGTAATAAACCCTAGAATA | NM_000024: | NM_000024:                               |
| 155    | ADRB3                                                     | adrenergic, beta-3-, receptor                                            | -0.11 | CAGGGTTCATAAGAAAGGTGAA | NM_000025: | NM_000025:                               |
| 155    | ADRB3                                                     | adrenergic, beta-3-, receptor                                            | 0.00  | GAGGCAGTAATAATAGGCCTAA | NM_000025: | NM_000025:                               |
| 156    | ADRBK1                                                    | adrenergic, beta, receptor kinase 1                                      | 0.77  | CGGGAGATCTTCGACTCATA   | NM_001619: | NM_001619:                               |
| 156    | ADRBK1                                                    | adrenergic, beta, receptor kinase 1                                      | -0.19 | CGGCTGGAGGCTCGCAAGAAA  | NM_001619: | NM_001619:                               |
| 157    | ADRBK2                                                    | adrenergic, beta, receptor kinase 2                                      | 1.11  | AAGATGTTCAAGTGTGGGTAA  | NM_005160: | NM_005160:                               |
| 157    | ADRBK2                                                    | adrenergic, beta, receptor kinase 2                                      | 2.13  | CAAGTGTATGGGATTAACATA  | NM_005160: | NM_005160:                               |
| 158    | ADSL (adenyladenylosuccinate lyase                        |                                                                          | -1.28 | CTCGAGAATTGTACCTTAAA   | NM_000026: | NM_000026:                               |
| 158    | ADSL (adenyladenylosuccinate lyase                        |                                                                          | 0.08  | TTGGAAGAGAATAAACCGAAA  | NM_000026: | NM_000026:                               |
| 165    | AEBP1                                                     | AE binding protein 1                                                     | -0.47 | CACCCCTGAGCACTACCATAGA | NM_001129: | NM_001129:                               |
| 165    | AEBP1                                                     | AE binding protein 1                                                     | -0.16 | CGGGAGATCATGGCCATGAA   | NM_001129: | NM_001129:                               |
| 166    | AES                                                       | amino-terminal enhancer of split                                         | -2.22 | CAGGCCACCCTCCCAAGGAA   | NM_198970: | NM_198969:NM_198970:NM_001130:           |
| 166    | AES                                                       | amino-terminal enhancer of split                                         | -1.37 | CGGCTGGAACATCGAGATGCA  | NM_198970: | NM_198969:NM_198970:NM_001130:           |
| 246181 | AFAR3                                                     | aflatoxin B1 aldehyde reductase 3                                        | -0.08 | CCCGCTTGTCTAATTTAGAA   | NM_201252: | NM_201252:                               |
| 246181 | AFAR3                                                     | aflatoxin B1 aldehyde reductase 3                                        | 0.30  | CACGTTGTATGATTTCTGTTTA | NM_201252: | NM_201252:                               |
| 2334   | AFF2                                                      | AF4/FMR2 family, member 2                                                | -2.02 | CGGCTTATTCTCATAATTA    | NM_002025: | NM_002025:                               |
| 2334   | AFF2                                                      | AF4/FMR2 family, member 2                                                | -0.07 | CTGGTAAGACTACTCAGTAA   | NM_002025: | NM_002025:                               |
| 10939  | AFG3L2                                                    | AFG3 ATPase family gene 3-like 2 (yeast)                                 | 0.37  | ATGATGAAGTACGAATACTTA  | NM_006796: | NM_006796:                               |
| 10939  | AFG3L2                                                    | AFG3 ATPase family gene 3-like 2 (yeast)                                 | 0.02  | CATGGTATTGGAGAAACCTTA  | NM_006796: | NM_006796:                               |
| 173    | AFM                                                       | afamin                                                                   | 1.62  | CCAGTGCATAAATAACTCAA   | NM_001133: | NM_001133:                               |
| 173    | AFM                                                       | afamin                                                                   | 2.09  | GAGAACTTCAATAGTACTCAA  | NM_001133: | NM_001133:                               |
| 174    | AFP                                                       | alpha-fetoprotein                                                        | 0.32  | CTGGAACGTGGTCAATGTATA  | NM_001134: | NM_001134:                               |
| 174    | AFP                                                       | alpha-fetoprotein                                                        | -0.25 | TACCAATGTACTGCAGAGATA  | NM_001134: | NM_001134:                               |
| 175    | AGA                                                       | aspartylglucosaminidase                                                  | 0.56  | TACGGTGTGCTGGTCAATAAA  | NM_000027: | NM_000027:                               |
| 175    | AGA                                                       | aspartylglucosaminidase                                                  | -1.37 | CAGGATATTCTATCCATAAA   | NM_000027: | NM_000027:                               |
| 79841  | AGBL2                                                     | ATP/GTP binding protein-like 2                                           | 0.95  | CATGATTACCAGAAATTTAA   | NM_024783: | NM_024783:                               |
| 79841  | AGBL2                                                     | ATP/GTP binding protein-like 2                                           | 0.99  | CCAATAGATATTCTCTCTAA   | NM_024783: | NM_024783:                               |
| 340351 | AGBL3                                                     | ATP/GTP binding protein-like 3                                           | 0.18  | CCCATCGTGCATAGCATAAA   | NM_178563: | NM_178563:                               |
| 340351 | AGBL3                                                     | ATP/GTP binding protein-like 3                                           | -1.46 | GACGGTGAGCCTACCCTGATA  | NM_178563: | NM_178563:                               |
| 84871  | AGBL4                                                     | ATP/GTP binding protein-like 4                                           | 0.39  | TGGGTTCTGTTTGAATAACTT  | NM_032785: | NM_032785:                               |
| 84871  | AGBL4                                                     | ATP/GTP binding protein-like 4                                           | 0.08  | CTGCGTGAATAAGAGTTTGA   | NM_032785: | NM_032785:                               |
| 177    | AGER                                                      | advanced glycosylation end product-specific receptor                     | -1.23 | AAGGGAGTACTGTGGAAGGAA  | NM_172197: | NM_172197:NM_001136:                     |
| 177    | AGER                                                      | advanced glycosylation end product-specific receptor                     | -0.91 | CACGGCTGGTGTCCCAATAA   | NM_172197: | NM_172197:NM_001136:                     |
| 178    | AGL                                                       | amylase-1, 6-glycosidase, 4-alpha-glucanotransferase (glycogen debran    | -1.33 | AAGGAGGAAACAACATATTAA  | NM_000028: | NM_000028:                               |
| 178    | AGL                                                       | amylase-1, 6-glycosidase, 4-alpha-glucanotransferase (glycogen debran    | 0.92  | ATGCAAGGTCATCATATGTAA  | NM_000028: | NM_000645:NM_000642:NM_000643:NM_000028: |
| 181    | AGRP                                                      | agouti related protein homolog (mouse)                                   | -1.43 | CAAGCTGGGACTGCACATGAA  | NM_007316: | NM_007316:NM_001138:                     |
| 181    | AGRP                                                      | agouti related protein homolog (mouse)                                   | -0.52 | CAGCCGCACCTAGTGGCCAA   | NM_007316: | NM_007316:NM_001138:                     |
| 183    | AGT                                                       | angiotensinogen (serpin peptidase inhibitor, clade A, member 8)          | 1.02  | CAGAGTCTACCCCAACACGTTA | NM_000029: | NM_000029:                               |
| 183    | AGT                                                       | angiotensinogen (serpin peptidase inhibitor, clade A, member 8)          | 0.93  | CTGTTTGAATGCGGAAACAATA | NM_000029: | NM_000029:                               |
| 185    | AGTR1                                                     | angiotensin II receptor, type 1                                          | 0.29  | ACGCACAATGGTGTAGCCAA   | NM_000685: | NM_000685:NM_032049:NM_031850:NM_004835: |
| 185    | AGTR1                                                     | angiotensin II receptor, type 1                                          | -2.92 | CGCGGGTTTGATATTGACAA   | NM_000685: | NM_000685:NM_031850:                     |
| 186    | AGTR2                                                     | angiotensin II receptor, type 2                                          | 1.33  | AGGAGTGTGTTTAGGCACATA  | NM_000686: | NM_000686:                               |
| 186    | AGTR2                                                     | angiotensin II receptor, type 2                                          | 0.26  | CTGCATGAGTGTGATAGGTA   | NM_000686: | NM_000686:                               |
| 57085  | AGTRAP                                                    | angiotensin II receptor-associated protein                               | -2.25 | CAGGGATTGCCTGAACCAAGA  | NM_020350: | NM_020350:                               |
| 57085  | AGTRAP                                                    | angiotensin II receptor-associated protein                               | -6.39 | CTGCTTCTGCTACCAACATGTA | NM_020350: | NM_020350:                               |
| 187    | AGTRL1                                                    | angiotensin II receptor-like 1                                           | -1.77 | CACCACTAAGGTGCAGTGCTA  | NM_005161: | NM_005161:                               |
| 187    | AGTRL1                                                    | angiotensin II receptor-like 1                                           | 0.04  | CACGTGGTTCATCAATAATA   | NM_005161: | NM_005161:                               |
| 189    | AGXT                                                      | alanine-glyoxylate aminotransferase (oxalosis I; hyperoxaluria I; glycol | 1.18  | CTCCCGGGAATGTTTAATAAA  | NM_000030: | NM_000030:                               |
| 189    | AGXT                                                      | alanine-glyoxylate aminotransferase (oxalosis I; hyperoxaluria I; glycol | -0.36 | CTGGAGAGACATCGTCAGCTA  | NM_000030: | NM_000030:                               |
| 64902  | AGXT2                                                     | alanine-glyoxylate aminotransferase 2                                    | 0.03  | CGGGATGAATTTGAAATGTT   | NM_031900: | NM_031900:                               |
| 64902  | AGXT2                                                     | alanine-glyoxylate aminotransferase 2                                    | 0.01  | AAGGGTGAATTTGAAAGATTT  | NM_031900: | NM_031900:                               |
| 64850  | AGXT2L1 (alt alanine-glyoxylate aminotransferase 2-like 1 |                                                                          | -0.80 | ATGTGTCAAATAGAGAGCAA   | NM_031279: | NM_031279:                               |
| 64850  | AGXT2L1 (alt alanine-glyoxylate aminotransferase 2-like 1 |                                                                          | -0.01 | CAGAAATAAACCAAGTGATAAT | NM_031279: | NM_031279:                               |
| 191    | AHCY                                                      | S-adenosylhomocysteine hydrolase                                         | -0.99 | CACCTGGTCTGGGACTTATA   | NM_000687: | NM_000687:                               |
| 191    | AHCY                                                      | S-adenosylhomocysteine hydrolase                                         | 0.22  | CAGCCGTCATACTGTTCCAAA  | NM_000687: | NM_000687:                               |
| 10768  | AHCYL1                                                    | S-adenosylhomocysteine hydrolase-like 1                                  | 0.34  | CCCCTTGGATTTATAGTATA   | NM_006621: | NM_006621:                               |
| 10768  | AHCYL1                                                    | S-adenosylhomocysteine hydrolase-like 1                                  | -0.56 | CTGATAGAACCCTCTAATGCA  | NM_006621: | NM_006621:                               |
| 196    | AHR (aryl hyd aryl hydrocarbon receptor                   |                                                                          | 0.23  | TTGCTTTACCTTCAAACTTTA  | NM_001621: | NM_001621:                               |
| 196    | AHR (aryl hyd aryl hydrocarbon receptor                   |                                                                          | 0.31  | CAGGAACACCTACATCTAGAA  | NM_001621: | NM_001621:                               |
| 57491  | AHRR                                                      | aryl-hydrocarbon receptor repressor                                      | -1.15 | TACGCAGGAGCCTACTCTGAA  | NM_020731: | NM_020731:                               |
| 57491  | AHRR                                                      | aryl-hydrocarbon receptor repressor                                      | 0.25  | CCCAACAGTCTTAAATGAAA   | NM_020731: | NM_020731:                               |
| 197    | AHSG                                                      | alpha-2-HS-glycoprotein                                                  | -0.24 | CACATGCGATCATACATTAATA | NM_001622: | NM_001622:                               |
| 197    | AHSG                                                      | alpha-2-HS-glycoprotein                                                  | -0.22 | CTGAAAGACCTCCTTAATAA   | NM_001622: | NM_001622:                               |
| 57379  | AICDA                                                     | activation-induced cytidine deaminase                                    | 0.33  | CAAAGGTATATTAACATATA   | NM_020661: | NM_020661:                               |
| 57379  | AICDA                                                     | activation-induced cytidine deaminase                                    | 1.11  | CCCAAGGTATATTAACATATA  | NM_020661: | NM_020661:                               |
| 199    | AIF1                                                      | allograft inflammatory factor 1                                          | 0.05  | CACCTAGCAGTGTGGTGGCAA  | NM_004847: | NM_004847:NM_032955:                     |
| 199    | AIF1                                                      | allograft inflammatory factor 1                                          | 2.83  | CAGAGTCAACAATAAATAATA  | NM_004847: | NM_001623:NM_004847:NM_032955:           |
| 150209 | AIFL                                                      | apoptosis-inducing factor like                                           | -0.17 | AACATGTTAGACATACCCTGA  | NM_144704: | NM_144704:NM_00108060:                   |
| 150209 | AIFL                                                      | apoptosis-inducing factor like                                           | 1.66  | CAGAAGATGCTCAACCCCTCAA | NM_144704: | NM_144704:NM_00108060:                   |
| 9049   | AIP                                                       | aryl hydrocarbon receptor interacting protein                            | -2.57 | CAACGTCGAAGGCTACTTCAA  | NM_003977: | NM_003977:                               |
| 9049   | AIP                                                       | aryl hydrocarbon receptor interacting protein                            | -1.17 | CCAGTTCCTCTGTGACATCAA  | NM_003977: | NM_003977:                               |
| 23746  | AIP1                                                      | aryl hydrocarbon receptor interacting protein-like 1                     | 0.08  | TACAGAAGAGCTTATGAAATA  | NM_014336: | NM_001033054:NM_001033055:NM_014336:     |
| 23746  | AIP1                                                      | aryl hydrocarbon receptor interacting protein-like 1                     | 0.01  | CCCAGGCTACTGTGAAGGCTTA | NM_014336: | NM_001033054:NM_001033055:NM_014336:     |
| 326    | AIRE                                                      | autoimmune regulator (autoimmune polyendocrinopathy candidiasis e        | 0.06  | CATCATGTGCTGGAATAATA   | NM_000658: | NM_000658:NM_000659:NM_000383:           |
| 326    | AIRE                                                      | autoimmune regulator (autoimmune polyendocrinopathy candidiasis e        | -2.44 | CGGCGCGCTGGGATCAAGAA   | NM_000658: | NM_000658:NM_000659:NM_000383:           |
| 55966  | AJAP1                                                     | adherens junction associated protein 1                                   | -1.11 | ATGCTTAGTATGAGCAGAATA  | NM_018836: | NM_018836:                               |
| 55966  | AJAP1                                                     | adherens junction associated protein 1                                   | 1.11  | CTGGTAAATACATATATAA    | NM_018836: | NM_018836:                               |
|        | AK001795                                                  |                                                                          | 1.88  | AACAAGTAATCCCTAGTACTA  | AK001795   | No hits found till 3 mismatches          |
| 203    | AK1 (adenyla adenylylate kinase 1                         |                                                                          | 0.96  | CGGGATGCCATGGTGGCCAA   | NM_000476: | NM_000476:                               |
| 203    | AK1 (adenyla adenylylate kinase 1                         |                                                                          | 1.61  | GCGGCTGGAGCCTATTACAAA  | NM_000476: | NM_000476:                               |
| 204    | AK2                                                       | adenylylate kinase 2                                                     | 1.55  | ATGGGTGGGAATGATAGGACA  | NM_001625: | NM_001625:                               |
| 204    | AK2                                                       | adenylylate kinase 2                                                     | -5.10 | CCACATGTAAGACTTGGTTA   | NM_001625: | NM_001625:                               |
| 50808  | AK3                                                       | adenylylate kinase 3                                                     | 1.58  | CCCGTGGCCTACTGTAATAAA  | NM_016282: | NM_016282:                               |
| 50808  | AK3                                                       | adenylylate kinase 3                                                     | 0.91  | CGTGGCCTACTGTAATAATAA  | NM_016282: | NM_016282:                               |
| 205    | AK3L1                                                     | adenylylate kinase 3-like 1                                              | 1.68  | CAGGAAGATGTGGTCAATTCAT | NM_013410: | NM_001003553:NM_013410:NM_203464:        |
| 205    | AK3L1                                                     | adenylylate kinase 3-like 1                                              | 2.52  | CCTGGTACAGCTGAAAGTAA   | NM_013410: | NM_001003553:NM_013410:NM_203464:        |
| 26289  | AK5                                                       | adenylylate kinase 5                                                     | -3.29 | CAGAGCTAGTCACTACATGAA  | NM_174858: | NM_012093:NM_174858:                     |
| 26289  | AK5                                                       | adenylylate kinase 5                                                     | -1.44 | CAGCATGGCAGTGTGACAAACA | NM_174858: | NM_012093:NM_174858:                     |
| 122481 | AK7                                                       | adenylylate kinase 7                                                     | 0.08  | CAAGATTGCTTGACCAATTA   | NM_152327: | NM_152327:                               |
| 122481 | AK7                                                       | adenylylate kinase 7                                                     | 1.28  | CAGGATCAATATATAATGAA   | NM_152327: | NM_152327:                               |
| 8165   | AKAP1                                                     | A kinase (PRKA) anchor protein 1                                         | 0.99  | AGCGCTGAACTTGATTGGGAA  | NM_003488: | NM_003488:NM_139275:                     |
| 8165   | AKAP1                                                     | A kinase (PRKA) anchor protein 1                                         | -0.16 | CACCGAGAGTGCAGTACAAA   | NM_003488: | NM_003488:NM_139275:                     |
| 11216  | AKAP10                                                    | A kinase (PRKA) anchor protein 10                                        | -0.93 | CAGATAAGCATAGAACTGATA  | NM_007202: | NM_007202:                               |
| 11216  | AKAP10                                                    | A kinase (PRKA) anchor protein 10                                        | 0.78  | TAGCAGGACAGCCACTTAA    | NM_007202: | NM_007202:                               |

|        |          |                                                                                   |       |                        |               |                                                   |
|--------|----------|-----------------------------------------------------------------------------------|-------|------------------------|---------------|---------------------------------------------------|
| 11215  | AKAP11   | A kinase (PRKA) anchor protein 11                                                 | 0.23  | ACCGGTTATCTAAATCTATTA  | NM_016248:    | NM_144490:NM_016248:                              |
| 11215  | AKAP11   | A kinase (PRKA) anchor protein 11                                                 | 0.00  | CTGACCGGTTATCTAAATCTA  | NM_016248:    | NM_144490:NM_016248:                              |
| 9590   | AKAP12   | A kinase (PRKA) anchor protein (gravin) 12                                        | -0.08 | ACGGATGTAGTGTGAAAGTA   | NM_005100:    | NM_005100:NM_144497:                              |
| 9590   | AKAP12   | A kinase (PRKA) anchor protein (gravin) 12                                        | -0.26 | CCCGAAATAATCGAACAGATT  | NM_005100:    | NM_005100:NM_144497:                              |
| 11214  | AKAP13   | A kinase (PRKA) anchor protein 13                                                 | -1.19 | CACGGTCATTATGAGAAACAA  | NM_006738:    | NM_144767:NM_006738:NM_007200:                    |
| 11214  | AKAP13   | A kinase (PRKA) anchor protein 13                                                 | 1.37  | CAGGATTTACACTGAAAGTAAT | NM_006738:    | NM_144767:NM_006738:NM_007200:                    |
| 158798 | AKAP14   | A kinase (PRKA) anchor protein 14                                                 | -0.75 | CCCATTGTCGTTTCTTATGTA  | NM_178813:    | NM_001008534:NM_178813:                           |
| 158798 | AKAP14   | A kinase (PRKA) anchor protein 14                                                 | -2.02 | TACGAGGATGAATTGACTCAA  | NM_178813:    | NM_001008535:NM_178813:NM_001008534:              |
| 10566  | AKAP3    | A kinase (PRKA) anchor protein 3                                                  | 0.45  | AGGGATCATGACCTATGCTAA  | NM_006422:    | NM_006422:                                        |
| 10566  | AKAP3    | A kinase (PRKA) anchor protein 3                                                  | 0.70  | ATCAAGCTATCCCAATATGAAA | NM_006422:    | NM_006422:                                        |
| 8852   | AKAP4    | A kinase (PRKA) anchor protein 4                                                  | 0.63  | GTCCGGTGAACACATTTCTCAA | NM_003886:    | NM_139289:NM_003886:                              |
| 8852   | AKAP4    | A kinase (PRKA) anchor protein 4                                                  | 0.45  | TACAGTGCTATGCCGATCAA   | NM_003886:    | NM_139289:NM_003886:                              |
| 9495   | AKAP5    | A kinase (PRKA) anchor protein 5                                                  | 0.48  | AGGGCTTTTCATCAAGAAATTA | NM_004857:    | NM_004857:                                        |
| 9495   | AKAP5    | A kinase (PRKA) anchor protein 5                                                  | 1.16  | ATCAGGTTGATCTTTAAATAA  | NM_004857:    | NM_004857:                                        |
| 9472   | AKAP6    | A kinase (PRKA) anchor protein 6                                                  | -3.02 | AAGCATGTGGATGACATCTA   | NM_004274:    | NM_004274:                                        |
| 9472   | AKAP6    | A kinase (PRKA) anchor protein 6                                                  | 1.92  | CACGTTTGTCACTGCCGTTTA  | NM_004274:    | NM_004274:                                        |
| 9465   | AKAP7    | A kinase (PRKA) anchor protein 7                                                  | -0.34 | AACGATGGGTGGAAGTCCAA   | NM_004842:    | NM_016377:NM_138633:NM_004842:                    |
| 9465   | AKAP7    | A kinase (PRKA) anchor protein 7                                                  | -2.47 | CCCATTGACGCTGAAGTAGTA  | NM_004842:    | NM_016377:NM_138633:NM_004842:                    |
| 10270  | AKAP8    | A kinase (PRKA) anchor protein 8                                                  | 0.43  | CAAGTTAGCACGCAACAGAA   | NM_005858:    | NM_005858:                                        |
| 10270  | AKAP8    | A kinase (PRKA) anchor protein 8                                                  | -3.42 | GAGGCCGGTAGTGACTCTCAA  | NM_005858:    | NM_005858:                                        |
| 26993  | AKAP8L   | A kinase (PRKA) anchor protein 8-like                                             | -0.23 | AAGAACACTTTAAGTACGTA   | NM_014371:    | NM_014371:                                        |
| 26993  | AKAP8L   | A kinase (PRKA) anchor protein 8-like                                             | -3.77 | CAGGATAACACCACCAACTAT  | NM_014371:    | NM_014371:                                        |
| 10142  | AKAP9    | A kinase (PRKA) anchor protein (yotiao) 9                                         | -2.40 | CAGCCTATCAGTGAACATCAA  | NM_005751:    | NM_147171:NM_147185:NM_005751:                    |
| 10142  | AKAP9    | A kinase (PRKA) anchor protein (yotiao) 9                                         | -1.49 | CAGCTTCAAGGGATATACAA   | NM_005751:    | NM_147171:NM_147185:NM_005751:                    |
| 10327  | AKR1A1   | aldo-keto reductase family 1, member A1 (aldehyde reductase)                      | 0.33  | AAGAATGCTGATGGGACTATA  | NM_006066:    | NM_006066:NM_153326:                              |
| 10327  | AKR1A1   | aldo-keto reductase family 1, member A1 (aldehyde reductase)                      | -2.95 | CAGCTGTTAAGTATGCCCTTA  | NM_006066:    | NM_006066:NM_153326:                              |
| 231    | AKR1B1   | aldo-keto reductase family 1, member B1 (aldose reductase)                        | -0.24 | TAGCTTGATGTGGATCTCAA   | NM_001628:    | NM_001628:                                        |
| 231    | AKR1B1   | aldo-keto reductase family 1, member B1 (aldose reductase)                        | -0.13 | CAAACCTGGCTTGAAGTATAA  | NM_001628:    | NM_001628:                                        |
| 57016  | AKR1B10  | aldo-keto reductase family 1, member B10 (aldose reductase)                       | -0.24 | GAGCAGGACGCTGAGACTCTTA | NM_020299:    | NM_020299:                                        |
| 57016  | AKR1B10  | aldo-keto reductase family 1, member B10 (aldose reductase)                       | -0.01 | GAGGATGTAAGATCAATAAA   | NM_020299:    | NM_020299:                                        |
| 8644   | AKR1C3   | aldo-keto reductase family 1, member C3 (3-alpha hydroxysteroid dehydrogenase)    | -1.48 | CACCTAATTATCCATATTTCA  | NM_003739:    | NM_003739:                                        |
| 8644   | AKR1C3   | aldo-keto reductase family 1, member C3 (3-alpha hydroxysteroid dehydrogenase)    | 0.26  | CTGGGATCTCAACGAGACAAA  | NM_003739:    | NM_003739:                                        |
| 1109   | AKR1C4   | aldo-keto reductase family 1, member C4 (chloroacetyl-CoA dehydrogenase)          | 0.51  | CCAGAAAGCAAAATAATAAA   | NM_001818:    | NM_001818:                                        |
| 1109   | AKR1C4   | aldo-keto reductase family 1, member C4 (chloroacetyl-CoA dehydrogenase)          | -0.24 | GAGGGTGTTCGACGACATCTA  | NM_001818:    | NM_001818:                                        |
| 340811 | AKR1CL1  | aldo-keto reductase family 1, member C-like 1                                     | 0.21  | TGGGAAAGAATTAATGCCAAA  | NM_001007536: | NM_001007536:                                     |
| 340811 | AKR1CL1  | aldo-keto reductase family 1, member C-like 1                                     | -0.06 | CAAGAGAGAGAAATATTTCTA  | NM_001007536: | NM_001007536:                                     |
| 83592  | AKR1CL2  | aldo-keto reductase family 1, member C-like 2                                     | -0.89 | TGGTGTCTGAATAGAACTAAA  | NM_031436:    | NM_031436:                                        |
| 83592  | AKR1CL2  | aldo-keto reductase family 1, member C-like 2                                     | 0.53  | AGGGAAGAATATACAGATTTA  | NM_031436:    | NM_031436:                                        |
| 6718   | AKR1D1   | aldo-keto reductase family 1, member D1 (delta 4-3-ketosteroid-5-beta reductase)  | 0.00  | TAGTGTACTTGGATAGCTTA   | NM_005989:    | NM_005989:                                        |
| 6718   | AKR1D1   | aldo-keto reductase family 1, member D1 (delta 4-3-ketosteroid-5-beta reductase)  | 0.34  | CTGGGTAGTACGCTGGTAAAT  | NM_005989:    | NM_005989:                                        |
| 8574   | AKR7A2   | aldo-keto reductase family 7, member A2 (afatoxin aldehyde reductase)             | 0.72  | TGGCCTTAAGCTGACTTAGAA  | NM_003689:    | NM_003689:                                        |
| 8574   | AKR7A2   | aldo-keto reductase family 7, member A2 (afatoxin aldehyde reductase)             | -0.01 | CCAGCTGGAGACGCTTAGAAA  | NM_003689:    | NM_003689:                                        |
| 22977  | AKR7A3   | aldo-keto reductase family 7, member A3 (afatoxin aldehyde reductase)             | -0.80 | AACTGAAGGACCCACTTTT    | NM_012067:    | NM_012067:                                        |
| 207    | AKT1     | v-akt murine thymoma viral oncogene homolog 1                                     | 0.71  | ACGCTACTTCTCCTCAAGAA   | NM_005163:    | NM_00104432:NM_00104431:NM_005163:                |
| 207    | AKT1     | v-akt murine thymoma viral oncogene homolog 1                                     | -1.26 | CACGCTTGGTCCCGAGGCCAA  | NM_005163:    | NM_00104432:NM_00104431:NM_005163:                |
| 208    | AKT2     | v-akt murine thymoma viral oncogene homolog 2                                     | -2.80 | ACGGGCTAAAGTGAACGATAA  | NM_001626:    | NM_001626:                                        |
| 208    | AKT2     | v-akt murine thymoma viral oncogene homolog 2                                     | 0.47  | CAAGCGTGGTGAATACATCAA  | NM_001626:    | NM_001626:                                        |
| 10000  | AKT3     | v-akt murine thymoma viral oncogene homolog 3 (protein kinase B, gamma)           | 0.42  | AACTGTTGGCTTTGGATTTAAA | NM_005465:    | NM_181690:                                        |
| 10000  | AKT3     | v-akt murine thymoma viral oncogene homolog 3 (protein kinase B, gamma)           | 0.34  | ACCAGAGGTTGTAAGAAGATAA | NM_005465:    | NM_181690:NM_005465:                              |
| 210    | ALAD     | aminolevulinic acid, delta-, dehydratase                                          | -0.52 | CTCCCAATAATCAACAGCAAA  | NM_000031:    | NM_001003945:NM_000031:                           |
| 210    | ALAD     | aminolevulinic acid, delta-, dehydratase                                          | 1.93  | AAGGGTGAGCCATCAAGCTTAA | NM_000031:    | NM_001003945:NM_000031:                           |
| 212    | ALAS2    | aminolevulinic acid, delta-, synthase 2 (sideroblastic/hypochromic anemia)        | 1.02  | GACCACCTAAGAAACTTCTA   | NM_000032:    | NM_001037969:NM_001037968:NM_000032:NM_001037967: |
| 212    | ALAS2    | aminolevulinic acid, delta-, synthase 2 (sideroblastic/hypochromic anemia)        | -0.41 | CAGGGACAAGATCATGGAGAAA | NM_000032:    | NM_001037969:NM_001037968:NM_000032:NM_001037967: |
| 214    | ALCAM    | activated leukocyte cell adhesion molecule                                        | -2.06 | CTGAAGAGAATGTTACATTTA  | NM_001627:    | NM_001627:                                        |
| 214    | ALCAM    | activated leukocyte cell adhesion molecule                                        | 0.09  | CAAGTGTTCCTGATAGACAAA  | NM_001627:    | NM_001627:                                        |
| 126133 | ALDH16A1 | aldehyde dehydrogenase 16 family, member A1                                       | 1.16  | CCCAATAAAGCTCTCTGACCAA | NM_153329:    | NM_153329:                                        |
| 126133 | ALDH16A1 | aldehyde dehydrogenase 16 family, member A1                                       | -4.69 | CCGGGTCTCCTGCTCCTCCAAA | NM_153329:    | NM_153329:                                        |
| 5832   | ALDH18A1 | aldehyde dehydrogenase 18 family, member A1                                       | 0.87  | GAGCCAGTCACTCCTAACAAA  | NM_002860:    | NM_002860:NM_001017423:                           |
| 5832   | ALDH18A1 | aldehyde dehydrogenase 18 family, member A1                                       | 0.20  | TCCGATTTAGTTGGTACTAGA  | NM_002860:    | NM_001017423:NM_002860:                           |
| 216    | ALDH1A1  | aldehyde dehydrogenase 1 family, member A1                                        | 0.45  | CTGAATAATAAAGCTTAATAAA | NM_000689:    | NM_000689:                                        |
| 216    | ALDH1A1  | aldehyde dehydrogenase 1 family, member A1                                        | 1.22  | CCACGTGGCATCTTTAATAAAA | NM_000689:    | NM_000689:                                        |
| 8854   | ALDH1A2  | aldehyde dehydrogenase 1 family, member A2                                        | -0.45 | TAGCCACTAACCAACTAGTTA  | NM_003888:    | NM_170696:NM_170697:NM_003888:                    |
| 8854   | ALDH1A2  | aldehyde dehydrogenase 1 family, member A2                                        | 0.94  | GCGGAGTACTCAGAAAGTTAA  | NM_003888:    | NM_170696:NM_170697:NM_003888:                    |
| 220    | ALDH1A3  | aldehyde dehydrogenase 1 family, member A3                                        | -0.02 | AACCTTGATAGTGATACGTTA  | NM_000693:    | NM_000693:                                        |
| 220    | ALDH1A3  | aldehyde dehydrogenase 1 family, member A3                                        | -0.29 | ACCAGTGTGTATACAGAAA    | NM_000693:    | NM_000693:                                        |
| 219    | ALDH1B1  | aldehyde dehydrogenase 1 family, member B1                                        | -0.88 | CAGCAGTGGATGTTGACAAA   | NM_000692:    | NM_000692:                                        |
| 219    | ALDH1B1  | aldehyde dehydrogenase 1 family, member B1                                        | -0.66 | TTGAACATAGTGGACTATAA   | NM_000692:    | NM_000692:                                        |
| 10840  | ALDH1L1  | aldehyde dehydrogenase 1 family, member L1                                        | 0.91  | CACCTGTTTGTCAACAGGTA   | NM_012190:    | NM_012190:                                        |
| 10840  | ALDH1L1  | aldehyde dehydrogenase 1 family, member L1                                        | -0.16 | CAGGGTCTCTTTGAGCCAA    | NM_012190:    | NM_012190:                                        |
| 160428 | ALDH1L2  | aldehyde dehydrogenase 1 family, member L2                                        | 0.70  | ATGGATATAATTGATAGTCCA  | XM_090294:    | XM_090294:                                        |
| 160428 | ALDH1L2  | aldehyde dehydrogenase 1 family, member L2                                        | 0.95  | ATGGTCAATTTTAAATTTCCAA | XM_090294:    | XM_090294:                                        |
| 217    | ALDH2    | aldehyde dehydrogenase 2 family (mitochondrial)                                   | -1.58 | CAGCCATTGATGGAAAGTTCA  | NM_000690:    | NM_000690:                                        |
| 217    | ALDH2    | aldehyde dehydrogenase 2 family (mitochondrial)                                   | -2.63 | CACAGTCAAAGTGCCTCAGAA  | NM_000690:    | NM_000690:                                        |
| 218    | ALDH3A1  | aldehyde dehydrogenase 3 family, member A1                                        | -0.64 | CAGCAACGACAAAGGTGATTA  | NM_000691:    | NM_000691:                                        |
| 218    | ALDH3A1  | aldehyde dehydrogenase 3 family, member A1                                        | 1.64  | AGGGAACCTCAGTGGTCTCAA  | NM_000691:    | NM_000691:                                        |
| 224    | ALDH3A2  | aldehyde dehydrogenase 3 family, member A2                                        | -0.32 | CTCTAAGAGAGATATCAATAAA | NM_000382:    | NM_001031806:NM_000382:                           |
| 224    | ALDH3A2  | aldehyde dehydrogenase 3 family, member A2                                        | 1.63  | GAGAATGTGATTTACTTTATA  | NM_000382:    | NM_001031806:NM_000382:                           |
| 221    | ALDH3B1  | aldehyde dehydrogenase 3 family, member B1                                        | -1.03 | CAGGAGCTGTGAACCTTTTAT  | NM_000694:    | NM_000694:NM_001030010:                           |
| 221    | ALDH3B1  | aldehyde dehydrogenase 3 family, member B1                                        | -0.08 | CTGGCTGATGTCACTGAATA   | NM_000694:    | NM_001030010:NM_000694:                           |
| 222    | ALDH3B2  | aldehyde dehydrogenase 3 family, member B2                                        | -0.96 | CCCACCTATACCGACTGGAA   | NM_000695:    | NM_000695:NM_001031615:                           |
| 222    | ALDH3B2  | aldehyde dehydrogenase 3 family, member B2                                        | -5.80 | CACGGCCGCTCCACAGCAAAA  | NM_000695:    | NM_000695:NM_001031615:                           |
| 8659   | ALDH4A1  | aldehyde dehydrogenase 4 family, member A1                                        | -0.52 | CAGGGTAAAGTGAACCTCAGA  | NM_003748:    | NM_003748:                                        |
| 8659   | ALDH4A1  | aldehyde dehydrogenase 4 family, member A1                                        | 1.61  | CAACTTCTACATCAACGACAAA | NM_003748:    | NM_003748:                                        |
| 7915   | ALDH5A1  | aldehyde dehydrogenase 5 family, member A1 (succinate-semialdehyde dehydrogenase) | 0.18  | AAGGAGACTTATCTACATATA  | NM_001080:    | NM_001080:NM_170740:                              |
| 7915   | ALDH5A1  | aldehyde dehydrogenase 5 family, member A1 (succinate-semialdehyde dehydrogenase) | 0.67  | TTCCGAAGTGGTCAAAATTTAA | NM_001080:    | NM_001080:NM_170740:                              |
| 4329   | ALDH6A1  | aldehyde dehydrogenase 6 family, member A1                                        | -0.59 | AACCATCATCTCGAATGTCAA  | NM_005589:    | NM_005589:                                        |
| 4329   | ALDH6A1  | aldehyde dehydrogenase 6 family, member A1                                        | -0.69 | CAGCTTTGTGGGATCCAACTAA | NM_005589:    | NM_005589:                                        |
| 501    | ALDH7A1  | aldehyde dehydrogenase 7 family, member A1                                        | -1.08 | AAGGTCTACTTGACTACTCAA  | NM_001182:    | NM_001182:                                        |
| 501    | ALDH7A1  | aldehyde dehydrogenase 7 family, member A1                                        | 0.39  | TCCGATTCCTATGCTTTTAA   | NM_001182:    | NM_001182:                                        |
| 64577  | ALDH8A1  | aldehyde dehydrogenase 8 family, member A1                                        | 1.10  | CAAGAAGATACATAGTTTGA   | NM_022568:    | NM_022568:NM_170771:                              |
| 64577  | ALDH8A1  | aldehyde dehydrogenase 8 family, member A1                                        | -2.38 | CTGGATAAAGCAGGTGTTCCA  | NM_022568:    | NM_022568:NM_170771:                              |
| 223    | ALDH9A1  | aldehyde dehydrogenase 9 family, member A1                                        | 0.61  | TACGCAAAATTTGATCACGAAA | NM_000696:    | NM_000696:                                        |
| 223    | ALDH9A1  | aldehyde dehydrogenase 9 family, member A1                                        | 0.45  | CGGTGTGACAATCGAAATTTA  | NM_000696:    | NM_000696:                                        |
| 226    | ALDOA    | aldolase A, fructose-bisphosphate                                                 | 0.24  | GCCAAATAACAGCTATTTTAA  | NM_000034:    | NM_184041:NM_184043:NM_000034:                    |
| 226    | ALDOA    | aldolase A, fructose-bisphosphate                                                 | 0.47  | TCCGGCACACTGCCAAATAAA  | NM_000034:    | NM_184041:NM_184043:NM_000034:                    |
| 229    | ALDOB    | aldolase B, fructose-bisphosphate                                                 | -1.85 | AAGGAGATAGCTGCAACCAAAA | NM_000035:    | NM_000035:                                        |
| 229    | ALDOB    | aldolase B, fructose-bisphosphate                                                 | 0.17  | CTGGAAATACACACATGTTTA  | NM_000035:    | NM_000035:                                        |

|        |                                                                                    |       |                        |               |                                                                                         |
|--------|------------------------------------------------------------------------------------|-------|------------------------|---------------|-----------------------------------------------------------------------------------------|
| 29929  | ALG6 (aspara asparagine-linked glycosylation 6 homolog (yeast, alpha-1,3-glucosylt | 0.56  | CGGTTGATCGTGGATTATT    | NM_013339:    | NM_013339:                                                                              |
| 29929  | ALG6 (aspara asparagine-linked glycosylation 6 homolog (yeast, alpha-1,3-glucosylt | 2.02  | AGGCCTTATTCTTAGACTA    | NM_013339:    | NM_013339:                                                                              |
| 238    | ALK anaplastic lymphoma kinase (Ki-1)                                              | 1.21  | CACCTACGTATTGAAGTAA    | NM_004304:    | NM_004304:                                                                              |
| 238    | ALK anaplastic lymphoma kinase (Ki-1)                                              | 0.06  | CTGGCCCTGTATACCGGATA   | NM_004304:    | NM_004304:                                                                              |
| 121642 | ALKBH2 alkB, alkylation repair homolog 2 (E. coli)                                 | -2.52 | CACGGACGTGTGACAGTATA   | NM_001001655: | NM_001001655:                                                                           |
| 121642 | ALKBH2 alkB, alkylation repair homolog 2 (E. coli)                                 | 0.04  | GTGCGGTTTACCCTGGTTTAA  | NM_001001655: | NM_001001655:                                                                           |
| 221120 | ALKBH3 alkB, alkylation repair homolog 3 (E. coli)                                 | 0.00  | ATCGCTATCATCTTTAGGCAA  | NM_139178:    | NM_139178:                                                                              |
| 221120 | ALKBH3 alkB, alkylation repair homolog 3 (E. coli)                                 | -1.33 | CAGAGAGGATATAAECTATCA  | NM_139178:    | NM_139178:                                                                              |
| 91801  | ALKBH8 alkB, alkylation repair homolog 8 (E. coli)                                 | 0.51  | GCCGTACTCATTTGCAAGATA  | NM_138775:    | NM_138775:                                                                              |
| 91801  | ALKBH8 alkB, alkylation repair homolog 8 (E. coli)                                 | 0.14  | CTGCAAAGCTACTACAGTCAA  | NM_138775:    | NM_138775:                                                                              |
| 239    | ALOX12 arachidonate 12-lipoxygenase                                                | 0.92  | CTGGTATGCGTGGTCCCTAA   | NM_000697:    | NM_000697:                                                                              |
| 239    | ALOX12 arachidonate 12-lipoxygenase                                                | 0.92  | CCCAAAGCTGTGCTAAACCAA  | NM_000697:    | NM_000697:                                                                              |
| 242    | ALOX12B arachidonate 12-lipoxygenase, 12R type                                     | 0.49  | CGGATATGCTACTATAGTCAT  | NM_001139:    | NM_001139:                                                                              |
| 242    | ALOX12B arachidonate 12-lipoxygenase, 12R type                                     | 0.89  | CTGATCCGATATGCTACTATA  | NM_001139:    | NM_001139:                                                                              |
| 246    | ALOX15 (ara) arachidonate 15-lipoxygenase                                          | 0.89  | CCCAAATGAGTTTAAACAATA  | NM_001140:    | NM_001140:                                                                              |
| 246    | ALOX15 (ara) arachidonate 15-lipoxygenase                                          | -0.10 | CTGGGAAATCATCTATCGGTA  | NM_001140:    | NM_001140:                                                                              |
| 247    | ALOX15B (an) arachidonate 15-lipoxygenase, type B                                  | -0.62 | CACCAAGAAGTGGTGCCAAA   | NM_001141:    | NM_001141:                                                                              |
| 247    | ALOX15B (an) arachidonate 15-lipoxygenase, type B                                  | -6.42 | TTGACCTTATGGTACCACC    | NM_001141:    | NM_001141:                                                                              |
| 240    | ALOX5 arachidonate 5-lipoxygenase                                                  | 1.46  | CCCAATTCATTAATTGAA     | NM_000698:    | NM_000698:                                                                              |
| 240    | ALOX5 arachidonate 5-lipoxygenase                                                  | -0.64 | ACCGACGTAAAGAACTGGAAA  | NM_000698:    | NM_000698:                                                                              |
| 241    | ALOX5AP arachidonate 5-lipoxygenase-activating protein                             | 1.93  | TTGGTGTCTCATCTAATCAA   | NM_001629:    | NM_001629:                                                                              |
| 241    | ALOX5AP arachidonate 5-lipoxygenase-activating protein                             | 0.51  | TGCTGGCATATTCAACTATTA  | NM_001629:    | NM_001629:                                                                              |
| 59344  | ALOXE3 arachidonate lipoxygenase 3                                                 | -2.44 | AAGCCGCTGACCAAGTCCAA   | NM_021628:    | NM_021628:                                                                              |
| 59344  | ALOXE3 arachidonate lipoxygenase 3                                                 | -0.26 | GACGATCTGCTGCTCTTCAA   | NM_021628:    | NM_021628:                                                                              |
| 248    | ALP1 alkaline phosphatase, intestinal                                              | -3.47 | CACGTCATCTGCTACGGCAA   | NM_001631:    | NM_001631:                                                                              |
| 248    | ALP1 alkaline phosphatase, intestinal                                              | 0.00  | TCCATTCTCCTAGGACACAAA  | NM_001631:    | NM_001631:                                                                              |
| 80216  | ALPK1 alpha-kinase 1                                                               | -3.57 | CAGCCCTGGTCTATCTGAA    | NM_025144:    | NM_025144:                                                                              |
| 80216  | ALPK1 alpha-kinase 1                                                               | -0.01 | CAGGCCCTACATTTAAAGCTA  | NM_025144:    | NM_025144:                                                                              |
| 115701 | ALPK2 alpha-kinase 2                                                               | -1.08 | AGGGAAGACCTTGGCATTTT   | NM_052947:    | NM_052947:                                                                              |
| 115701 | ALPK2 alpha-kinase 2                                                               | -5.19 | CGGCTCATGCTGCTTCTCAA   | NM_052947:    | NM_052947:                                                                              |
| 249    | ALPL alkaline phosphatase, liver/bone/kidney                                       | 5.09  | CAGGATGGAAACATCACTTAA  | NM_000478:    | NM_000478:                                                                              |
| 249    | ALPL alkaline phosphatase, liver/bone/kidney                                       | -1.33 | CGGGACTGGTACTCAGACAA   | NM_000478:    | NM_000478:                                                                              |
| 251    | ALPPL2 alkaline phosphatase, placental-like 2                                      | 2.01  | CTGGAAACACAAAGCAATAA   | X53279:       | NM_031313:                                                                              |
| 251    | ALPPL2 alkaline phosphatase, placental-like 2                                      | 0.50  | TTGCTTATCTGCTGCTTCAA   | X53279:       | NM_031313:                                                                              |
| 57679  | ALS2 amyotrophic lateral sclerosis 2 (juvenile)                                    | -2.80 | CAGAGAGTGAATCACTGGAA   | NM_020919:    | NM_020919:                                                                              |
| 57679  | ALS2 amyotrophic lateral sclerosis 2 (juvenile)                                    | 0.19  | CGGGCCAGGATTAGGAATTTA  | NM_020919:    | NM_020919:                                                                              |
| 259173 | ALS2CCL ALS2 C-terminal like                                                       | 1.07  | CAGCCTGACCCCTGGCTCAAA  | NM_147129:    | NM_147129;NM_182775:                                                                    |
| 259173 | ALS2CCL ALS2 C-terminal like                                                       | -0.42 | CCCAAAGTGGCTGTAATCAT   | NM_147129:    | NM_147129;NM_182775:                                                                    |
| 55437  | ALS2CR2 amyotrophic lateral sclerosis 2 (juvenile) chromosome region, candida      | -8.10 | CAGGAACACTGTAACATAA    | NM_018571:    | NM_018571:                                                                              |
| 55437  | ALS2CR2 amyotrophic lateral sclerosis 2 (juvenile) chromosome region, candida      | 1.86  | CCAGTGAACACTCACAGTAA   | NM_018571:    | NM_018571:                                                                              |
| 65061  | ALS2CR7 (an) amyotrophic lateral sclerosis 2 (juvenile) chromosome region, candida | 0.31  | CTGACATAAATCAAGTCTAA   | NM_139158:    | NM_139158:                                                                              |
| 65061  | ALS2CR7 (an) amyotrophic lateral sclerosis 2 (juvenile) chromosome region, candida | -1.99 | CTGGGCTAGATCCACCACCAA  | NM_139158:    | NM_139158:                                                                              |
| 60529  | ALX4 aristaless-like homeobox 4                                                    | -4.93 | CAGCCTCAGCCACGGCTCAA   | NM_021926:    | NM_021926:                                                                              |
| 60529  | ALX4 aristaless-like homeobox 4                                                    | -7.34 | CGGACCACCTTACCAGCTA    | NM_021926:    | NM_021926:                                                                              |
| 23600  | AMACR alpha-methylacyl-CoA racemase                                                | 0.93  | GACGGGATTGCTTTACATAA   | NM_014324:    | NM_203382;NM_014324:                                                                    |
| 23600  | AMACR alpha-methylacyl-CoA racemase                                                | 0.51  | TTGACTGAGTTAAGTTACAA   | NM_014324:    | NM_203382;NM_014324:                                                                    |
| 262    | AMD1 adenosylmethionine decarboxylase 1                                            | 1.05  | CTGGGCTTAATTTCTTTAAA   | NM_001634:    | NM_001033059;NM_001634:                                                                 |
| 265    | AMELX amelogenin (amelogenesis imperfecta 1, X-linked)                             | -3.10 | CAGGAGTGACACAAGAACACA  | NM_001142:    | NM_001142;NM_182680;NM_182681:                                                          |
| 265    | AMELX amelogenin (amelogenesis imperfecta 1, X-linked)                             | 0.69  | CAAAACGAAACTTGCACTGAA  | NM_001142:    | NM_001142;NM_182680;NM_182681:                                                          |
| 267    | AMFR autocrine motility factor receptor                                            | 1.59  | AAGGATCGATTTGAATATCTT  | NM_138958:    | NM_138958;NM_001144:                                                                    |
| 267    | AMFR autocrine motility factor receptor                                            | 1.58  | CACGCTCAGTTGAAATAACAA  | NM_138958:    | NM_138958;NM_001144:                                                                    |
| 268    | AMH anti-Mullerian hormone                                                         | 0.23  | CGGCTGGCTGCTGAAGTCAA   | NM_000479:    | NM_000479:                                                                              |
| 268    | AMH anti-Mullerian hormone                                                         | -0.36 | CCACGTGGTCTGCTGCTGAA   | NM_000479:    | NM_000479:                                                                              |
| 269    | AMHR2 anti-Mullerian hormone receptor, type II                                     | 0.78  | CAGAATGGTCTCATTGGGAA   | NM_020547:    | NM_020547:                                                                              |
| 269    | AMHR2 anti-Mullerian hormone receptor, type II                                     | 0.78  | ATGGCCAATATAAACCAGGTA  | NM_020547:    | NM_020547:                                                                              |
| 84883  | AMID apoptosis-inducing factor (AIF)-like mitochondrion-associated inducer         | -1.46 | CACCGACTATGTTACAGTGA   | NM_032797:    | NM_032797:                                                                              |
| 84883  | AMID apoptosis-inducing factor (AIF)-like mitochondrion-associated inducer         | 0.83  | CAGGTTTCATTTAAGAAGAAA  | NM_032797:    | NM_032797:                                                                              |
| 347902 | AMIGO2 adhesion molecule with Ig-like domain 2                                     | 0.48  | TAGATGTTTCTTAAACCGAA   | NM_181847:    | NM_181847:                                                                              |
| 347902 | AMIGO2 adhesion molecule with Ig-like domain 2                                     | 2.01  | TAGATGTTTCTTAAACCGAA   | NM_181847:    | NM_181847:                                                                              |
| 9949   | AMMECR1 Alport syndrome, mental retardation, midface hypoplasia and elliptocy      | -0.02 | CGCCAGCATCATCTTTCCAA   | NM_015365:    | NM_001025580;NM_015365:                                                                 |
| 9949   | AMMECR1 Alport syndrome, mental retardation, midface hypoplasia and elliptocy      | -0.13 | CTGACCAGGTACTGAGTAA    | NM_015365:    | NM_001025580;NM_015365:                                                                 |
| 81693  | AMN amnionless homolog (mouse)                                                     | -2.61 | CAGGGTGGCTTACTCAGTAA   | NM_030943:    | NM_030943:                                                                              |
| 81693  | AMN amnionless homolog (mouse)                                                     | -1.06 | CAGCCACAGTTACTTCTGCTAA | NM_030943:    | NM_030943:                                                                              |
| 270    | AMPD1 adenosine monophosphate deaminase 1 (isoform M)                              | 4.74  | TTGCTGAGGCTTCTAAATCAA  | NM_000036:    | NM_000036:                                                                              |
| 270    | AMPD1 adenosine monophosphate deaminase 1 (isoform M)                              | -4.26 | CGCCATGTACCACCTAAGTAA  | NM_000036:    | NM_000036:                                                                              |
| 271    | AMPD2 (ader) adenosine monophosphate deaminase 2 (isoform L)                       | -4.16 | CGGCAACCAATGCGCAGACAT  | NM_004037:    | NM_004037;NM_203404;NM_139156:                                                          |
| 271    | AMPD2 (ader) adenosine monophosphate deaminase 2 (isoform L)                       | 0.02  | CGGCTTCTGCCCACAGGTAAA  | NM_004037:    | NM_004037;NM_203404;NM_139156:                                                          |
| 272    | AMPD3 (ader) adenosine monophosphate deaminase (isoform E)                         | 0.71  | CGGATATGACACCTTATGCAA  | NM_000480:    | NM_000480;NM_000480;NM_001025390:                                                       |
| 272    | AMPD3 (ader) adenosine monophosphate deaminase (isoform E)                         | 1.28  | CTGCGTGACCTGATTTTGAAA  | NM_000480:    | NM_000480;NM_000480;NM_001025390:                                                       |
| 51321  | AMZ2 archaemetzincins-2                                                            | -0.39 | CCCGTGAAGCCCTTAAAGGAA  | NM_016627:    | NM_016627;NM_001033572;NM_001033574;NM_01033570;NM_001033571;NM_001033569:              |
| 51321  | AMZ2 archaemetzincins-2                                                            | 0.28  | CAGCATTGTAGAAAGATACAA  | NM_016627:    | NM_016627;NM_001033572;NM_001033574;NM_01033570;NM_001033571;NM_001033569:              |
| 64682  | ANAPC1 anaphase promoting complex subunit 1                                        | 0.88  | AACGATTACTAATAAAGAGA   | NM_022662:    | NM_022662:                                                                              |
| 64682  | ANAPC1 anaphase promoting complex subunit 1                                        | -0.01 | AACGTGACTCTGCAACAACAA  | NM_022662:    | NM_022662:                                                                              |
| 10393  | ANAPC10 anaphase promoting complex subunit 10                                      | 1.10  | ATCCTGTATTCAAATAATATA  | NM_014885:    | NM_014885:                                                                              |
| 10393  | ANAPC10 anaphase promoting complex subunit 10                                      | -0.38 | CAAGGCATCCGTTATATCTAA  | NM_014885:    | NM_014885:                                                                              |
| 51529  | ANAPC11 APC11 anaphase promoting complex subunit 11 homolog (yeast)                | -3.17 | CAGGCCATTTGAGATCTTTG   | NM_016476:    | NM_001002246;NM_001002249;NM_016476;NM_01002248:                                        |
| 51529  | ANAPC11 APC11 anaphase promoting complex subunit 11 homolog (yeast)                | -2.57 | CGCCAGGAATGGAAGTTCAA   | NM_016476:    | NM_001002247;NM_001002244;NM_001002246;NM_001002249;NM_016476;NM_001002248;NM_01002245: |
| 29882  | ANAPC2 anaphase promoting complex subunit 2                                        | -9.17 | AAGTTCTTCTACCGCATCTA   | NM_013366:    | NM_013366:                                                                              |
| 29882  | ANAPC2 anaphase promoting complex subunit 2                                        | -1.33 | CTCACTGGATCGTATCTAGAA  | NM_013366:    | NM_013366:                                                                              |
| 29945  | ANAPC4 anaphase promoting complex subunit 4                                        | -6.61 | CAAGCTGGTGTGCTGCGCTTTA | NM_013367:    | NM_013367:                                                                              |
| 29945  | ANAPC4 anaphase promoting complex subunit 4                                        | -1.87 | CAAGGCTAGATGAACAAGTGA  | NM_013367:    | NM_013367:                                                                              |
| 51433  | ANAPC5 anaphase promoting complex subunit 5                                        | -1.54 | ACCCCTTGAATAACCATCTCTA | NM_016237:    | NM_016237:                                                                              |
| 51433  | ANAPC5 anaphase promoting complex subunit 5                                        | -0.53 | CAGAATCAAACCTGATGGCTGA | NM_016237:    | NM_016237:                                                                              |
| 51434  | ANAPC7 anaphase promoting complex subunit 7                                        | 0.78  | CAGCTTCTATAGCAACGCTA   | NM_016238:    | NM_016238:                                                                              |
| 51434  | ANAPC7 anaphase promoting complex subunit 7                                        | 0.41  | CCCAAAGCCAGATTACATTA   | NM_016238:    | NM_016238:                                                                              |
| 283    | ANG angiogenin, ribonuclease, RNase A family, 5                                    | 1.10  | AACGTTGTTGTTGCTGTGGA   | NM_001145:    | NM_001145:                                                                              |
| 283    | ANG angiogenin, ribonuclease, RNase A family, 5                                    | -2.21 | CAGCATCAAGGCCATCTGTGA  | NM_001145:    | NM_001145:                                                                              |
| 284    | ANGPT1 angiotensinogen 1                                                           | -0.11 | AACGTTTATTAGAACAATAA   | NM_001146:    | NM_001146:                                                                              |
| 284    | ANGPT1 angiotensinogen 1                                                           | -3.16 | CGGATTTCTCTCCAGAAA     | NM_001146:    | NM_001146:                                                                              |
| 285    | ANGPT2 angiotensinogen 2                                                           | 1.15  | CAGCAACGCTATGTGCTTAA   | NM_001147:    | NM_001147:                                                                              |
| 285    | ANGPT2 angiotensinogen 2                                                           | -0.62 | TGCAACTGACTAATCAGCAA   | NM_001147:    | NM_001147:                                                                              |
| 51378  | ANGPT4 angiotensinogen 4                                                           | 0.44  | CAAGACGATCTTGAGGTCGAA  | NM_015985:    | NM_015985:                                                                              |
| 51378  | ANGPT4 angiotensinogen 4                                                           | 0.84  | CAGGCTTTCTGTGCTGGGTA   | NM_015985:    | NM_015985:                                                                              |
| 9068   | ANGPTL1 angiotensinogen-like 1                                                     | 0.33  | CGGAGATAGATGTTCTGCAA   | NM_004673:    | NM_004673:                                                                              |

|        |              |                                                                       |       |                        |            |                                                    |
|--------|--------------|-----------------------------------------------------------------------|-------|------------------------|------------|----------------------------------------------------|
| 9068   | ANGPTL1      | angiopoietin-like 1                                                   | 1.42  | CTCGTGTACTCAACTCTATA   | NM_004673: | NM_004673:                                         |
| 23452  | ANGPTL2      | angiopoietin-like 2                                                   | -1.32 | ACCGCCGTATAGATAATGTA   | NM_012098: | NM_012098:                                         |
| 23452  | ANGPTL2      | angiopoietin-like 2                                                   | -1.62 | CCGCATCTCATCTCCAACAATA | NM_012098: | NM_012098:                                         |
| 27329  | ANGPTL3      | angiopoietin-like 3                                                   | 0.59  | ACCGTGAAGACCAATATAAA   | NM_014495: | NM_014495:                                         |
| 27329  | ANGPTL3      | angiopoietin-like 3                                                   | -2.54 | CAGGTAGTCCATGGACATTAA  | NM_014495: | NM_014495:                                         |
| 51129  | ANGPTL4      | angiopoietin-like 4                                                   | -0.27 | CAGATGGAGCGTGGACAGTAA  | NM_016109: | NM_139314;NM_016109:                               |
| 51129  | ANGPTL4      | angiopoietin-like 4                                                   | 0.08  | CAGCCTGCAGACACAACCTCAA | NM_016109: | NM_139314;NM_016109:                               |
| 253935 | ANGPTL5 (ar) | angiopoietin-like 5                                                   | 0.07  | CACCGAGTGGTTTATACATAA  | NM_178127: | NM_178127:                                         |
| 253935 | ANGPTL5 (ar) | angiopoietin-like 5                                                   | 1.75  | TACGGACTCTTCAGTAGTTAA  | NM_178127: | NM_178127:                                         |
| 83854  | ANGPTL6      | angiopoietin-like 6                                                   | -2.61 | CACCGTGGATAGGACCGGAGA  | NM_031917: | NM_031917:                                         |
| 83854  | ANGPTL6      | angiopoietin-like 6                                                   | -0.01 | GAGGCAAGATGGTTCAAGTCAA | NM_031917: | NM_031917:                                         |
| 10218  | ANGPTL7      | angiopoietin-like 7                                                   | 2.05  | CTGAAGGTAGATGGTGTATAA  | NM_021146: | NM_021146:                                         |
| 10218  | ANGPTL7      | angiopoietin-like 7                                                   | -0.05 | ACCGCCTGGGTGAGCACAAATA | NM_021146: | NM_021146:                                         |
| 287    | ANK2         | ankyrin 2, neuronal                                                   | 0.94  | ACCGTGCAACCGGTGATATA   | NM_001148: | NM_001148:                                         |
| 287    | ANK2         | ankyrin 2, neuronal                                                   | -0.22 | CAGGACCCCTTCTAACATAAAA | NM_001148: | NM_001148:                                         |
| 288    | ANK3         | ankyrin 3, node of Ranvier (ankyrin G)                                | -0.24 | CTAGTCGATATTTAAGCATA   | NM_001149: | NM_001149;NM_020987:                               |
| 288    | ANK3         | ankyrin 3, node of Ranvier (ankyrin G)                                | 1.17  | CGCATCTTACGTTTACGTAA   | NM_001149: | NM_001149;NM_020987:                               |
| 162282 | ANKFN1       | ankyrin-repeat and fibronectin type III domain containing 1           | 0.33  | CAGGACAGAAATATCCTTACA  | NM_153228: | NM_153228:                                         |
| 162282 | ANKFN1       | ankyrin-repeat and fibronectin type III domain containing 1           | 0.62  | TTGAATGTAAAGCTCAGTAAA  | NM_054027: | NM_054027:                                         |
| 56172  | ANKH         | ankylosis, progressive homolog (mouse)                                | 0.62  | ATCAATGAACATTTGACCTTA  | NM_054027: | NM_054027:                                         |
| 56172  | ANKH         | ankylosis, progressive homolog (mouse)                                | 1.04  | CCCAATATACTCTTTGCAATA  | NM_054027: | NM_054027:                                         |
| 54467  | ANKIB1       | ankyrin repeat and IBR domain containing 1                            | 1.04  | AACGGAATGTGCACAATGAAA  | XM_377955: | XM_377955;XM_380018:                               |
| 54467  | ANKIB1       | ankyrin repeat and IBR domain containing 1                            | -0.56 | AGGAGCCGAGATGGAATTTTA  | XM_377955: | XM_377955;XM_380018:                               |
| 255239 | ANKK1        | ankyrin repeat and kinase domain containing 1                         | -0.08 | GCGGACGGAGTACGCCATCAA  | NM_178510: | NM_178510:                                         |
| 255239 | ANKK1        | ankyrin repeat and kinase domain containing 1                         | -2.34 | GCGGACGGAGTACGCCATCAA  | NM_178510: | NM_178510:                                         |
| 51281  | ANKMY1       | ankyrin repeat and MYND domain containing 1                           | -1.53 | CAGCAAGTACTGCAAGACCAA  | NM_016552: | NM_016552;NM_017844:                               |
| 51281  | ANKMY1       | ankyrin repeat and MYND domain containing 1                           | 0.02  | CCAGAGAACATGGACAGCAA   | NM_016552: | NM_016552;NM_017844:                               |
| 91074  | ANKRD30A     | ankyrin repeat domain 30A                                             | 2.09  | AACCGTATATATCAATATGAA  | NM_052997: | NM_052997:                                         |
| 91074  | ANKRD30A     | ankyrin repeat domain 30A                                             | -0.87 | CAGGAGATGCTGTTTGCAAAA  | NM_052997: | NM_052997:                                         |
| 353322 | ANKRD37      | ankyrin repeat domain 37                                              | -2.53 | CCCAATTTGATTTATGTAATA  | NM_181726: | NM_181726:                                         |
| 353322 | ANKRD37      | ankyrin repeat domain 37                                              | -0.84 | AAGTTTCTTACAACAATTTAA  | NM_181726: | NM_181726:                                         |
| 54443  | ANLN         | anillin, actin binding protein (scraps homolog, Drosophila)           | 0.33  | CACCGTTCCATCGTCTCGTA   | NM_018685: | NM_018685:                                         |
| 54443  | ANLN         | anillin, actin binding protein (scraps homolog, Drosophila)           | 0.17  | CTGATGCTTGCTACAACACCTA | NM_018685: | NM_018685:                                         |
| 8125   | ANP32A       | acidic (leucine-rich) nuclear phosphoprotein 32 family, member A      | -3.14 | CGGAGCTGGTTGAGCCTTCAA  | NM_006305: | NM_006305:                                         |
| 8125   | ANP32A       | acidic (leucine-rich) nuclear phosphoprotein 32 family, member A      | 0.05  | AACGTTGCTGGGGAACGAGA   | NM_006305: | NM_006305:                                         |
| 81611  | ANP32E       | acidic (leucine-rich) nuclear phosphoprotein 32 family, member E      | 0.32  | CCGAGCTAAATAAATCTCGA   | NM_030920: | NM_030920:                                         |
| 81611  | ANP32E       | acidic (leucine-rich) nuclear phosphoprotein 32 family, member E      | 0.81  | TTGGAAGTAAATGATAAATA   | NM_030920: | NM_030920:                                         |
| 290    | ANPEP        | alanyl (membrane) aminopeptidase (aminopeptidase N, aminopeptidase N) | -1.36 | CCGAAATGCCACATGGTCAA   | NM_001150: | NM_001150:                                         |
| 290    | ANPEP        | alanyl (membrane) aminopeptidase (aminopeptidase N, aminopeptidase N) | -1.18 | CCGGTGAACATCGACGAAGA   | NM_001150: | NM_001150:                                         |
| 84168  | ANTXR1       | anthrax toxin receptor 1                                              | 0.31  | CCGAGGAACAACCTTAATGAA  | NM_018153: | NM_032208;NM_018153;NM_053034:                     |
| 84168  | ANTXR1       | anthrax toxin receptor 1                                              | 0.89  | CTGACAGAAAGACAGAGAACAA | NM_018153: | NM_032208;NM_018153;NM_053034:                     |
| 118429 | ANTXR2       | anthrax toxin receptor 2                                              | 0.09  | CACGTCGACGATGCCAAATTA  | NM_058172: | NM_058172:                                         |
| 118429 | ANTXR2       | anthrax toxin receptor 2                                              | 0.99  | CCGAGTCCATCTCAAGTAAA   | NM_058172: | NM_058172:                                         |
| 93550  | ANUBL1       | AN1, ubiquitin-like, homolog (Xenopus laevis)                         | 0.07  | CTGCCCGGATTCGATTATA    | NM_174890: | NM_174890:                                         |
| 93550  | ANUBL1       | AN1, ubiquitin-like, homolog (Xenopus laevis)                         | 1.41  | ATGGTGTGGAAATGAATGAAA  | NM_174890: | NM_174890:                                         |
| 301    | ANXA1        | annexin A1                                                            | -0.19 | ATGCCTCACAGCTATCGTAAA  | NM_000700: | NM_000700:                                         |
| 301    | ANXA1        | annexin A1                                                            | 0.08  | ATGGTTAAAGGTGGATGAAA   | NM_000700: | NM_000700:                                         |
| 302    | ANXA2        | annexin A2                                                            | 0.99  | TCGCTATTAAGTTAAATTTTA  | NM_004039: | NM_001002857;NM_001002858;NM_004039:               |
| 302    | ANXA2        | annexin A2                                                            | 1.21  | TTAAGTAAATTAATGAAA     | NM_004039: | NM_001002857;NM_001002858;NM_004039:               |
| 221656 | AOF1         | amine oxidase (flavin containing) domain 1                            | -1.22 | ATCGATGGCGGTATGAAACCAA | NM_153042: | NM_153042:                                         |
| 221656 | AOF1         | amine oxidase (flavin containing) domain 1                            | -0.42 | AGGGAATAATATGACTTTAA   | XM_173173: | NM_153042:                                         |
| 23028  | AOF2         | amine oxidase (flavin containing) domain 2                            | -0.64 | CTGGAATGACTATGATTTAA   | NM_015013: | NM_015013:                                         |
| 23028  | AOF2         | amine oxidase (flavin containing) domain 2                            | 0.79  | AGGCCTAGACATTAACCTGAA  | NM_015013: | NM_015013:                                         |
| 316    | AOX1         | aldehyde oxidase 1                                                    | -0.18 | ACCAACAGAAATTAACCCATA  | NM_001159: | NM_001159:                                         |
| 316    | AOX1         | aldehyde oxidase 1                                                    | 0.33  | TACCCTCAACTTGCTATCAA   | NM_001159: | NM_001159:                                         |
| 1174   | AP1S1        | adaptor-related protein complex 1, sigma 1 subunit                    | -0.01 | CAAAAGTTGTCTATAAGAGATA | NM_001283: | NM_057089;NM_001283:                               |
| 1174   | AP1S1        | adaptor-related protein complex 1, sigma 1 subunit                    | -0.23 | CGAGCTGGACATCATCTTCAA  | NM_001283: | NM_057089;NM_001283:                               |
| 8905   | AP1S2        | adaptor-related protein complex 1, sigma 2 subunit                    | 1.19  | CAGGCAATATACATTTATTA   | NM_003916: | NM_003916:                                         |
| 8905   | AP1S2        | adaptor-related protein complex 1, sigma 2 subunit                    | 0.31  | AAGGGAACCTTTAGTTAATTA  | NM_003916: | NM_003916:                                         |
| 163    | AP2B1        | adaptor-related protein complex 2, beta 1 subunit                     | -0.68 | CCGGTGCACATTAAAGATCCA  | NM_001282: | NM_001282;NM_001030006:                            |
| 163    | AP2B1        | adaptor-related protein complex 2, beta 1 subunit                     | 2.81  | TCCCATCTATGTTAAACTAGA  | NM_001282: | NM_001282;NM_001030006:                            |
| 1173   | AP2M1        | adaptor-related protein complex 2, mu 1 subunit                       | -1.88 | TGGAGGCTTATTCATCTATAA  | NM_004068: | NM_004068;NM_001025205:                            |
| 1173   | AP2M1        | adaptor-related protein complex 2, mu 1 subunit                       | 0.41  | TGCCATCGTGGGAAGATCAA   | NM_004068: | NM_004068;NM_001025205:                            |
| 8546   | AP3B1        | adaptor-related protein complex 3, beta 1 subunit                     | 1.26  | TTGCCGTTACCAGTAACATA   | NM_152671: | NM_003664:                                         |
| 8943   | AP3D1        | adaptor-related protein complex 3, delta 1 subunit                    | -0.64 | CTGAGTGTAAATTAACCTCTA  | NM_003938: | NM_003938:                                         |
| 8943   | AP3D1        | adaptor-related protein complex 3, delta 1 subunit                    | -0.64 | CTGAGTGTAAATTAACCTCTA  | NM_003938: | NM_003938:                                         |
| 1176   | AP3S1        | adaptor-related protein complex 3, sigma 1 subunit                    | -4.10 | CCGGTGAAGGCCATCCGCAAA  | NM_001284: | NM_001284;NM_001002924:                            |
| 1176   | AP3S1        | adaptor-related protein complex 3, sigma 1 subunit                    | -0.49 | CAAGGGATCCTCAATCTTCAA  | NM_001284: | NM_001284;NM_001002924:                            |
| 317    | APAF1        | apoptotic peptidase activating factor                                 | -0.36 | AAGGCAATGGAGATAAATTA   | NM_001160: | NM_013229;NM_181868;NM_181869;NM_181861;NM_001160: |
| 317    | APAF1        | apoptotic peptidase activating factor                                 | 0.82  | CAGTGAAGGTATGGAATATTA  | NM_001160: | NM_013229;NM_181868;NM_181861;NM_001160:           |
| 324    | APC          | adenomatosis polyposis coli                                           | -0.67 | CAGACTAAGCATTGAGCATAA  | NM_000038: | NM_000038:                                         |
| 324    | APC          | adenomatosis polyposis coli                                           | 0.25  | CCGGTGAATGACAGTGTTTCA  | NM_000038: | NM_000038:                                         |
| 10297  | APC2         | adenomatosis polyposis coli 2                                         | 0.06  | CCGCGTCTCTGGACAATCAA   | NM_005883: | NM_005883:                                         |
| 10297  | APC2         | adenomatosis polyposis coli 2                                         | 1.23  | CAGTGTAAACGACGCTGATA   | NM_005883: | NM_005883:                                         |
| 325    | APCS         | amyloid P component, serum                                            | 1.04  | CTGTATGCTGCCAATTTAA    | NM_001639: | NM_001639:                                         |
| 325    | APCS         | amyloid P component, serum                                            | 2.03  | AGAGGATATGTCATCATCAA   | NM_001639: | NM_001639:                                         |
| 10290  | APEG1        | aortic preferentially expressed gene 1                                | 1.13  | AACACATTTCTTAACCTCAA   | NM_005876: | NM_005876:                                         |
| 10290  | APEG1        | aortic preferentially expressed gene 1                                | -8.18 | CAGCTGGAATAACAAGCCCAA  | NM_005876: | NM_005876:                                         |
| 327    | APEH         | N-acylaminoacyl-peptide hydrolase                                     | -3.33 | CAGAGGAATGTGGCTATGTA   | NM_001640: | NM_001640:                                         |
| 327    | APEH         | N-acylaminoacyl-peptide hydrolase                                     | -0.26 | CAGGAGGAACACTTTGATGGA  | NM_001640: | NM_001640:                                         |
| 328    | APEX1        | APEX nuclease (multifunctional DNA repair enzyme) 1                   | -1.82 | ACCCTTAATTAAGATCCTCAA  | NM_001641: | NM_001641:                                         |
| 328    | APEX1        | APEX nuclease (multifunctional DNA repair enzyme) 1                   | -0.33 | CCAGATATACTGTGCTTCAA   | NM_001641: | NM_001641;NM_080648;NM_080649:                     |
| 27301  | APEX2        | APEX nuclease (apurinic/aprimidinic endonuclease) 2                   | -0.58 | ACGCTGACGACACAACATCAA  | NM_014481: | NM_014481:                                         |
| 27301  | APEX2        | APEX nuclease (apurinic/aprimidinic endonuclease) 2                   | -0.11 | CTGGCTATCGTTGAGGGTTAT  | NM_014481: | NM_014481:                                         |
| 51107  | APH1A        | anterior pharynx defective 1 homolog A (C. elegans)                   | -1.42 | TTGGTGTGATAAATACCCTAA  | NM_016022: | NM_016022:                                         |
| 51107  | APH1A        | anterior pharynx defective 1 homolog A (C. elegans)                   | -0.08 | ATGAAATTAATGGAGGCTCAA  | NM_016022: | NM_016022:                                         |
| 8539   | API5         | apoptosis inhibitor 5                                                 | 0.75  | AAGAGTAATGGTCAATCTTA   | NM_006595: | NM_006595:                                         |
| 8539   | API5         | apoptosis inhibitor 5                                                 | 1.21  | CAAGTTGCTTCAAACTCAA    | NM_006595: | NM_006595:                                         |
| 8862   | APLN         | apelin, AGTRL1 ligand                                                 | 0.96  | CCCAATGCTTATGAGGTCAA   | NM_017413: | NM_017413:                                         |
| 8862   | APLN         | apelin, AGTRL1 ligand                                                 | 1.16  | TGGCCTGACATGGCTATATA   | NM_017413: | NM_017413:                                         |
| 333    | APLP1        | amyloid beta (A4) precursor-like protein 1                            | -0.80 | CCCTACTAACATCCCAATAAA  | NM_005166: | NM_001024807;NM_005166:                            |
| 333    | APLP1        | amyloid beta (A4) precursor-like protein 1                            | -0.02 | CACAGACGGTGTGGATATTTA  | NM_005166: | NM_001024807;NM_005166:                            |
| 334    | APLP2        | amyloid beta (A4) precursor-like protein 2                            | 1.02  | TAGCCTGTAGCTTATATTTGA  | NM_001642: | NM_001642:                                         |
| 334    | APLP2        | amyloid beta (A4) precursor-like protein 2                            | 0.38  | CAGCGTCTCTAGAGAGCTTA   | NM_001642: | NM_001642:                                         |
| 335    | APOA1        | apolipoprotein A-I                                                    | 0.87  | CACGCTCAGCGAGAGGCCAAA  | NM_000039: | NM_000039;XM_496536:                               |
| 335    | APOA1        | apolipoprotein A-I                                                    | 1.57  | CTCAGAAATAACGTTTCCAAA  | NM_000039: | NM_000039;XM_496536:                               |
| 336    | APOA2        | apolipoprotein A-II                                                   | 0.02  | AGGCCAAGTCTACTTTGAAA   | NM_001643: | NM_001643:                                         |



|        |              |                                                                         |       |                        |            |                                          |
|--------|--------------|-------------------------------------------------------------------------|-------|------------------------|------------|------------------------------------------|
| 336    | APOA2 (apoli | apolipoprotein A-II                                                     | -0.30 | CCCCTCTTTGCTACAATAAA   | NM_001643: | NM_001643:                               |
| 116519 | APOA5        | apolipoprotein A-V                                                      | -3.36 | CTGACATAGCTCTAGACCTAA  | NM_052968: | NM_052968:                               |
| 116519 | APOA5        | apolipoprotein A-V                                                      | -5.39 | CTCCCGGAAGCTCAGCCTCAA  | NM_052968: | NM_052968:                               |
| 338    | APOB         | apolipoprotein B (including Ag(x) antigen)                              | -1.00 | CAGCACCTAGCTGGAAAGTTA  | NM_000384: | NM_000384:                               |
| 338    | APOB         | apolipoprotein B (including Ag(x) antigen)                              | -0.81 | CGGGTCAAATATACCTTGAA   | NM_000384: | NM_000384:                               |
| 55911  | APOB48R      | apolipoprotein B48 receptor                                             | -0.66 | CTGGGAATACCGTGAACCTAA  | NM_018690: | NM_018690:NM_182804:                     |
| 55911  | APOB48R      | apolipoprotein B48 receptor                                             | -0.59 | AAGGCTGGGACTCGAAAGAAA  | NM_018690: | NM_018690:NM_182804:                     |
| 344    | APOC2        | apolipoprotein C-II                                                     | -0.89 | ACAATAAATCTGTAAACAAA   | NM_000483: | NM_000483:                               |
| 344    | APOC2        | apolipoprotein C-II                                                     | 0.02  | GTGAATAGTAAACAATAATAA  | NM_000483: | NM_000483:                               |
| 345    | APOC3        | apolipoprotein C-III                                                    | -0.15 | CCCAATAAAGCTGGACGAAGAA | NM_000040: | NM_000040:XM_496537:                     |
| 345    | APOC3        | apolipoprotein C-III                                                    | 1.13  | CTGGAGCACCCGTTAAGGACAA | NM_000040: | NM_000040:XM_496537:                     |
| 348    | APOE         | apolipoprotein E                                                        | 1.94  | CCCTAGTTTAAATAAGATTCA  | NM_000041: | NM_000041:                               |
| 348    | APOE         | apolipoprotein E                                                        | -1.38 | AAGGAGTTGAAAGGCCTACAAA | NM_000041: | NM_000041:                               |
| 319    | APOF         | apolipoprotein F                                                        | -0.92 | ATGAGTTGCCCTGTAATTTA   | NM_001638: | NM_001638:                               |
| 319    | APOF         | apolipoprotein F                                                        | -3.07 | AAGCTATATACATGTCTTCAA  | NM_001638: | NM_001638:                               |
| 350    | APOH         | apolipoprotein H (beta-2-glycoprotein I)                                | 0.32  | CAAGTTGTAAGCATCTTGTA   | NM_000042: | NM_000042:                               |
| 350    | APOH         | apolipoprotein H (beta-2-glycoprotein I)                                | -0.45 | CTGGATGGCCCGGAAGAAATA  | NM_000042: | NM_000042:                               |
| 23780  | APOL2        | apolipoprotein L 2                                                      | 0.34  | AAGCGGCACCAATGTAGCAAA  | NM_030882: | NM_145637:NM_030882:                     |
| 23780  | APOL2        | apolipoprotein L 2                                                      | -0.79 | CAGGTTGAGAGGGTGTGGAA   | NM_030882: | NM_145637:NM_030882:                     |
| 351    | APP          | amyloid beta (A4) precursor protein (peptidase nexin-II, Alzheimer dise | 0.15  | AAGGATGACTACAGACATTAA  | NM_000484: | NM_201414:NM_000484:NM_201413:           |
| 351    | APP          | amyloid beta (A4) precursor protein (peptidase nexin-II, Alzheimer dise | 1.84  | ACCCAAATAGCTCCTACTTTA  | NM_000484: | NM_201414:NM_000484:NM_201413:           |
| 10513  | APPPB2       | amyloid beta precursor protein (cytoplasmic tail) binding protein 2     | 0.76  | AGGGATGTAAGTAAGTTA     | NM_006380: | NM_006380:                               |
| 10513  | APPPB2       | amyloid beta precursor protein (cytoplasmic tail) binding protein 2     | -1.51 | CAGCATGTACCGCATGTGTAA  | NM_006380: | NM_006380:                               |
| 353    | APRT         | adenine phosphoribosyltransferase                                       | -3.41 | CAGCCACACTGAACCCAAATTA | NM_000485: | NM_000485:NM_001030018:                  |
| 353    | APRT         | adenine phosphoribosyltransferase                                       | 0.16  | CTGTGTTTCAGCCACACTGAA  | NM_000485: | NM_000485:NM_001030018:                  |
| 10603  | APS          | adaptor protein with pleckstrin homology and src homology 2 domains     | 0.82  | CGCGGACACCTCTGCACTCAA  | NM_020979: | NM_020979:                               |
| 10603  | APS          | adaptor protein with pleckstrin homology and src homology 2 domains     | 0.94  | CCCCTGTCAGCCATCATTTGA  | NM_020979: | NM_020979:                               |
| 54840  | APTX         | aprataxin                                                               | 0.00  | ACAGTTGAAAGCAGAGTGTA   | NM_017692: | NM_175073:NM_175071:NM_175069:NM_017692: |
| 54840  | APTX         | aprataxin                                                               | 0.65  | CTACTCTTTCTCTAAATTTAA  | NM_017692: | NM_175073:NM_175071:NM_175072:NM_175069: |
| 357    | APXL         | apical protein-like (Xenopus laevis)                                    | 0.60  | CTCAATGATGACGGCAATAAA  | NM_001649: | NM_001649:                               |
| 357    | APXL         | apical protein-like (Xenopus laevis)                                    | 2.03  | TTCACTCTTCTCAGATTAAA   | NM_001649: | NM_001649:                               |
| 134549 | APXL2        | apical protein 2                                                        | 1.20  | CTGGATGGAGTATTCTTTAA   | NM_133456: | NM_133456:                               |
| 134549 | APXL2        | apical protein 2                                                        | -1.07 | CGGGCGCTGGCTAAGTTGAA   | NM_133456: | NM_133456:                               |
| 358    | AQP1         | aquaporin 1 (Colton blood group)                                        | 1.17  | TTGGAATTCATTATATGTTA   | NM_000385: | NM_000385:NM_198098:                     |
| 358    | AQP1         | aquaporin 1 (Colton blood group)                                        | -0.53 | CTGAGTGACCTCTCTGCGAA   | NM_000385: | NM_000385:NM_198098:                     |
| 359    | AQP2         | aquaporin 2 (collecting duct)                                           | 0.73  | AAGCTGTGATGTTGATATAT   | NM_000486: | NM_000486:                               |
| 359    | AQP2         | aquaporin 2 (collecting duct)                                           | -6.63 | CAGGGTAGAGAGGACAAAGAA  | NM_000486: | NM_000486:                               |
| 360    | AQP3         | aquaporin 3 (Gill blood group)                                          | 0.57  | CTCCTTAACTCCTACTCAA    | NM_004925: | NM_004925:                               |
| 360    | AQP3         | aquaporin 3 (Gill blood group)                                          | -0.37 | CTGGATGTACATACATAAGTA  | NM_004925: | NM_004925:                               |
| 361    | AQP4         | aquaporin 4                                                             | -1.24 | TACAACATGGTTGACAGATAA  | NM_001650: | NM_004028:NM_001650:                     |
| 361    | AQP4         | aquaporin 4                                                             | 0.64  | GACGGATGACCTGATTCTAAA  | NM_001650: | NM_004028:NM_001650:                     |
| 362    | AQP5 (aquap  | aquaporin 5                                                             | -2.83 | AACCTCATCTCTGCTCTCTT   | NM_001651: | NM_001651:                               |
| 362    | AQP5 (aquap  | aquaporin 5                                                             | 0.92  | AATGAACCCAGCCCGCTCTT   | NM_001651: | NM_001651:                               |
| 363    | AQP6         | aquaporin 6, kidney specific                                            | -0.23 | CAGGACTGCTGTGAAATCAA   | NM_001652: | NM_053286:NM_001652:                     |
| 363    | AQP6         | aquaporin 6, kidney specific                                            | 1.59  | CTAAGTTGGTTTAAATAGTTAA | NM_001652: | NM_053286:NM_001652:                     |
| 364    | AQP7         | aquaporin 7                                                             | -0.77 | CCAGGAAATCTGACAGAGGAA  | NM_001170: | NM_001170:                               |
| 364    | AQP7         | aquaporin 7                                                             | 0.39  | GCACATATGGTTCTAAATAAA  | NM_001170: | NM_001170:                               |
| 343    | AQP8 (aquap  | aquaporin 8                                                             | -2.96 | CTGACAATTTCTCACTTTGCAA | NM_001169: | NM_001169:                               |
| 343    | AQP8 (aquap  | aquaporin 8                                                             | -0.11 | GAGCGTGTCTTGAGAGGAA    | NM_001169: | NM_001169:                               |
| 366    | AQP9         | aquaporin 9                                                             | -0.02 | ACGACTGTGCTTGCCATTAT   | NM_020980: | NM_020980:                               |
| 366    | AQP9         | aquaporin 9                                                             | 1.60  | CAACAAACCCATAAATGAAA   | NM_020980: | NM_020980:                               |
| 367    | AR           | androgen receptor (dihydrotestosterone receptor; testicular feminizatio | 0.44  | AAGGAACCTCGATCGTATCATT | NM_000044: | NM_000044:NM_001011645:                  |
| 367    | AR           | androgen receptor (dihydrotestosterone receptor; testicular feminizatio | -2.61 | CACGGGAAGTTAGAGAGCTTA  | NM_000044: | NM_000044:NM_001011645:                  |
| 369    | ARAF         | v-rat murine sarcoma 3611 viral oncogene homolog                        | 0.05  | CCCCTGACCATGCACAATTT   | NM_001654: | NM_001654:                               |
| 369    | ARAF         | v-rat murine sarcoma 3611 viral oncogene homolog                        | -7.45 | CGACTCATCAAGGAGGAGAAA  | NM_001654: | NM_001654:                               |
| 8260   | ARD1A        | ARD1 homolog A, N-acetyltransferase (S. cerevisiae)                     | -0.24 | CGCCCTGCACCTCTATTCCA   | NM_003491: | NM_003491:                               |
| 8260   | ARD1A        | ARD1 homolog A, N-acetyltransferase (S. cerevisiae)                     | -1.98 | CACAGAGAGCAGACATGTCAA  | NM_003491: | NM_003491:                               |
| 374    | AREG         | amphiregulin (schwannoma-derived growth factor)                         | 0.38  | CAGAGTTGAACAGGTAGTTAA  | NM_001657: | NM_001657:                               |
| 374    | AREG         | amphiregulin (schwannoma-derived growth factor)                         | -3.26 | CTGCCAAGTCATAGCCATAAA  | NM_001657: | NM_001657:                               |
| 23647  | ARFIP2       | ADP-ribosylation factor interacting protein 2 (arfaplin 2)              | 0.53  | AAAGTTTGACATCGTCAAGAA  | NM_012402: | NM_012402:                               |
| 23647  | ARFIP2       | ADP-ribosylation factor interacting protein 2 (arfaplin 2)              | 0.80  | CAGGACCCAACTCAATGAAA   | NM_012402: | NM_012402:                               |
| 383    | ARG1 (argina | arginase, liver                                                         | -1.41 | AAGCATAGAGTTATCCTTGTA  | NM_000045: | NM_000045:                               |
| 383    | ARG1 (argina | arginase, liver                                                         | 0.04  | CGATATAAATCTCATAGTTAA  | NM_000045: | NM_000045:                               |
| 55114  | ARHGAP17     | Rho GTPase activating protein 17                                        | 1.31  | CAGCAGACATGACAACATTTA  | NM_018054: | NM_018054:NM_001006634:                  |
| 55114  | ARHGAP17     | Rho GTPase activating protein 17                                        | -0.01 | AAGCAGTGGTAACTACTCTA   | NM_018054: | NM_018054:NM_001006634:                  |
| 23092  | ARHGAP26     | Rho GTPase activating protein 26                                        | 0.81  | ACCGTATGGCCTATAGTTTAA  | NM_015071: | NM_015071:                               |
| 23092  | ARHGAP26     | Rho GTPase activating protein 26                                        | -0.89 | AGGGAGTACTAGTAGGTTA    | NM_015071: | NM_015071:                               |
| 396    | ARHGDIA      | Rho GDP dissociation inhibitor (GDI) alpha                              | -0.24 | ATCCAGCATACGTACAGAGAAA | NM_004309: | NM_004309:                               |
| 396    | ARHGDIA      | Rho GDP dissociation inhibitor (GDI) alpha                              | 1.13  | CGCCTGGCCATCAGATTATA   | NM_004309: | NM_004309:                               |
| 397    | ARHGDIB      | Rho GDP dissociation inhibitor (GDI) beta                               | -0.93 | CACAGCTGGTCCCTCTTCAA   | NM_001175: | NM_001175:                               |
| 397    | ARHGDIB      | Rho GDP dissociation inhibitor (GDI) beta                               | 0.00  | CACTGAATAAATGATCAGAA   | NM_001175: | NM_001175:                               |
| 398    | ARHGDIG (Ri  | Rho GDP dissociation inhibitor (GDI) gamma                              | 0.40  | AAGGAAGGTGTTGATTACAGA  | NM_001176: | NM_001176:                               |
| 398    | ARHGDIG (Ri  | Rho GDP dissociation inhibitor (GDI) gamma                              | -0.96 | CAGAGTGAAGATCTCCTTCAA  | NM_001176: | NM_001176:                               |
| 9639   | ARHGEF10     | Rho guanine nucleotide exchange factor (GEF) 10                         | -0.78 | CAGGACGTCACCCAGAAATAA  | NM_014629: | NM_014629:                               |
| 9639   | ARHGEF10     | Rho guanine nucleotide exchange factor (GEF) 10                         | 0.48  | CCGAGTCTTCATGTTAAATGA  | NM_014629: | NM_014629:                               |
| 9826   | ARHGEF11     | Rho guanine nucleotide exchange factor (GEF) 11                         | 0.02  | CACAACGACTCTCGACCGGAA  | NM_014784: | NM_014784:NM_198236:                     |
| 9826   | ARHGEF11     | Rho guanine nucleotide exchange factor (GEF) 11                         | 0.55  | CTGGAGGATCAGCAAGGATAA  | NM_014784: | NM_014784:NM_198236:                     |
| 9828   | ARHGEF17     | Rho guanine nucleotide exchange factor (GEF) 17                         | 1.03  | CAGGAGGTTATTCCAGAGCATA | NM_014786: | NM_014786:                               |
| 9828   | ARHGEF17     | Rho guanine nucleotide exchange factor (GEF) 17                         | -0.29 | CAGGCTCGAACCCGTCGCAAA  | NM_014786: | NM_014786:                               |
| 9181   | ARHGEF2      | rho/rac guanine nucleotide exchange factor (GEF) 2                      | -0.84 | CAGCACCCCTACTGCCCTTTAA | NM_004723: | NM_004723:                               |
| 9181   | ARHGEF2      | rho/rac guanine nucleotide exchange factor (GEF) 2                      | 0.14  | CAGCGATTGGTCAACTCTTAT  | NM_004723: | NM_004723:                               |
| 50649  | ARHGEF4      | Rho guanine nucleotide exchange factor (GEF) 4                          | 0.52  | CACATTAATTTCAATAATAAA  | NM_015320: | NM_032995:NM_015320:                     |
| 50649  | ARHGEF4      | Rho guanine nucleotide exchange factor (GEF) 4                          | -4.87 | CCGCGACGTTGTTACTACAAA  | NM_015320: | NM_032995:NM_015320:                     |
| 7984   | ARHGEF5      | Rho guanine nucleotide exchange factor (GEF) 5                          | 1.08  | TGGGAACCTTTCAATATAAA   | NM_005435: | NM_001002861:NM_005435:                  |
| 7984   | ARHGEF5      | Rho guanine nucleotide exchange factor (GEF) 5                          | 0.50  | TTCAGTGATAGCCGATGTTA   | NM_005435: | NM_001002861:NM_005435:                  |
| 9459   | ARHGEF6      | Rac/Cdc42 guanine nucleotide exchange factor (GEF) 6                    | -1.57 | CTGGTACTCTGGATAACGAA   | NM_004840: | NM_004840:                               |
| 9459   | ARHGEF6      | Rac/Cdc42 guanine nucleotide exchange factor (GEF) 6                    | 0.19  | CTGTGAGAAGTTGTAATATTA  | NM_004840: | NM_004840:                               |
| 8289   | ARID1A       | AT rich interactive domain 1A (SWI-like)                                | 1.24  | AACCAAGTACTGTTGTTTAA   | NM_018450: | NM_139135:NM_006015:NM_018450:           |
| 8289   | ARID1A       | AT rich interactive domain 1A (SWI-like)                                | -7.57 | CACCTTGGTTACTACTCGGCAA | NM_018450: | NM_139135:NM_006015:NM_018450:           |
| 5826   | ARID4A       | AT rich interactive domain 4A (RBP1-like)                               | 0.05  | ACGATTAAGTTGATGATATT   | NM_002892: | NM_002892:NM_023000:NM_023001:           |
| 5826   | ARID4A       | AT rich interactive domain 4A (RBP1-like)                               | -1.65 | CTGGTTGACATTTGCTAAGTA  | NM_002892: | NM_002892:NM_023000:NM_023001:           |
| 25820  | ARIH1        | ariadne homolog, ubiquitin-conjugating enzyme E2 binding protein, 1     | -1.76 | CTGCGCTTTGAGCACAACTA   | NM_005744: | NM_005744:                               |
| 25820  | ARIH1        | ariadne homolog, ubiquitin-conjugating enzyme E2 binding protein, 1     | -1.70 | TAGAGTGCATCGACTGTAA    | NM_005744: | NM_005744:                               |
| 10425  | ARIH2        | ariadne homolog 2 (Drosophila)                                          | 0.14  | AAAGTTGTACAAATATACAA   | NM_006321: | NM_006321:                               |
| 10425  | ARIH2        | ariadne homolog 2 (Drosophila)                                          | 0.57  | ATCGTGAACCCAGGCAACAA   | NM_006321: | NM_006321:                               |
| 403    | ARL3         | ADP-ribosylation factor-like 3                                          | 1.24  | AGGGAACAACACGGTTTAGAA  | NM_004311: | NM_004311:                               |
| 403    | ARL3         | ADP-ribosylation factor-like 3                                          | 1.14  | ACCGATATTTCTATATATGTA  | NM_004311: | NM_004311:                               |

|        |         |                                                                      |       |                        |            |                                          |
|--------|---------|----------------------------------------------------------------------|-------|------------------------|------------|------------------------------------------|
| 7873   | ARMET   | arginine-rich, mutated in early stage tumors                         | -2.72 | CAGCCAGATATGTGAGCTTAA  | NM_006010: | NM_006010:                               |
| 7873   | ARMET   | arginine-rich, mutated in early stage tumors                         | 0.32  | CTGAAGAAGCTCCGAGTTAAA  | NM_006010: | NM_006010:                               |
| 405    | ARNT    | aryl hydrocarbon receptor nuclear translocator                       | 0.76  | CAGCCAATATACAACTGTAAA  | NM_001668: | NM_001668;NM_178427;NM_178426:           |
| 405    | ARNT    | aryl hydrocarbon receptor nuclear translocator                       | -1.27 | ACGGACAAGATGACAGCCTTA  | NM_001668: | NM_001668;NM_178427;NM_178426:           |
| 9915   | ARNT2   | aryl-hydrocarbon receptor nuclear translocator 2                     | -0.79 | GTGGACAGTTAAAGTACTTAA  | NM_014862: | NM_014862:                               |
| 9915   | ARNT2   | aryl-hydrocarbon receptor nuclear translocator 2                     | -0.99 | CGGAAACAGCTCTAGGAATAA  | NM_014862: | NM_014862:                               |
| 406    | ARNTL   | aryl hydrocarbon receptor nuclear translocator-like                  | 0.06  | TCGATGGTTCAGTTTCATGAA  | NM_001178: | NM_001178;NM_001030272;NM_001030273:     |
| 406    | ARNTL   | aryl hydrocarbon receptor nuclear translocator-like                  | 0.92  | TAGGCATCGTGTTATGAAAT   | NM_001178: | NM_001178;NM_001030272;NM_001030273:     |
| 56938  | ARNTL2  | aryl hydrocarbon receptor nuclear translocator-like 2                | 0.02  | CCCGTGTTCAGTGAATGGAA   | NM_020183: | NM_020183:                               |
| 56938  | ARNTL2  | aryl hydrocarbon receptor nuclear translocator-like 2                | 0.05  | ATGGATGCTTACCCAACTCAA  | NM_020183: | NM_020183:                               |
| 10776  | ARPP-19 | cyclic AMP phosphoprotein, 19 kD                                     | 0.29  | CCCGGCCGGCTTATGATTTAA  | NM_006628: | NM_006628:                               |
| 10776  | ARPP-19 | cyclic AMP phosphoprotein, 19 kD                                     | 0.02  | CGGCATGTTTGTAGCATACAA  | NM_006628: | NM_006628:                               |
| 407    | ARR3    | arrestin 3, retinal (X-arrestin)                                     | 0.98  | CCACTGTAACACTCTAATAAAA | NM_004312: | NM_004312:                               |
| 407    | ARR3    | arrestin 3, retinal (X-arrestin)                                     | -1.04 | CTGGTTGCCGGAAGTACAAA   | NM_004312: | NM_004312:                               |
| 408    | ARRB1   | arrestin, beta 1                                                     | -0.49 | CTCGACGTTCTGCAAGGCTCA  | NM_020251: | NM_004041;NM_020251:                     |
| 408    | ARRB1   | arrestin, beta 1                                                     | 0.55  | CCAGTAGATACCAATCTCATA  | NM_020251: | NM_004041;NM_020251:                     |
| 409    | ARRB2   | arrestin, beta 2                                                     | 0.25  | CAAGCTGTGTTCTACCTAAA   | NM_199004: | NM_004313;NM_199004:                     |
| 409    | ARRB2   | arrestin, beta 2                                                     | -0.01 | CTCGAACAAAGATGACCAGGTA | NM_199004: | NM_004313;NM_199004:                     |
| 410    | ARSA    | arylsulfatase A                                                      | 0.59  | TCGGCAGTCTCTCTTCTCTA   | NM_000487: | NM_000487:                               |
| 410    | ARSA    | arylsulfatase A                                                      | 0.42  | CAGGGCTTCCATCGATTCTCA  | NM_000487: | NM_000487:                               |
| 411    | ARSB    | arylsulfatase B                                                      | 0.28  | AACCACTTATATAGTACATAA  | NM_000046: | NM_000046:                               |
| 411    | ARSB    | arylsulfatase B                                                      | 0.62  | CACATTTCTTACCGAAATGAA  | NM_000046: | NM_000046:                               |
| 414    | ARSD    | arylsulfatase D                                                      | 0.62  | TCGGTGTCTACGGGAAACAATA | NM_001669: | NM_001669;NM_009589:                     |
| 414    | ARSD    | arylsulfatase D                                                      | 1.11  | AAGTTTCTTAAATGCAATCGAA | NM_001669: | NM_001669:                               |
| 415    | ARSE    | arylsulfatase E (chondrodysplasia punctata 1)                        | -0.16 | AGGGAAGATGACCCCAATAAA  | NM_000047: | NM_000047:                               |
| 415    | ARSE    | arylsulfatase E (chondrodysplasia punctata 1)                        | -0.54 | CACGAGTTCCTGATGATTAT   | NM_000047: | NM_000047:                               |
| 416    | ARSF    | arylsulfatase F                                                      | -0.17 | ACGGAGGGCATTGGGAAGCTA  | NM_004042: | NM_004042:                               |
| 416    | ARSF    | arylsulfatase F                                                      | -0.60 | CTGAACGAGCTGGATCCATTA  | NM_004042: | NM_004042:                               |
| 22901  | ARSG    | arylsulfatase G                                                      | -1.49 | CTGAAGACGATACCCGAGAAA  | NM_014960: | NM_014960:                               |
| 22901  | ARSG    | arylsulfatase G                                                      | -6.57 | AAGGACAAGTGGACCACACA   | NM_014960: | NM_014960:                               |
| 347527 | ARSH    | arylsulfatase family, member H                                       | -2.88 | CAGCCATAAGAGAGCATCGTA  | XM_293401: | NM_001011719:                            |
| 347527 | ARSH    | arylsulfatase family, member H                                       | -0.40 | GACGTTGGAATTGCATCCTTA  | XM_293401: | NM_001011719:                            |
| 340075 | ARSI    | arylsulfatase family, member I                                       | -0.86 | CTGGCCGAATATAACCCGCACA | XM_291139: | NM_001012301:                            |
| 340075 | ARSI    | arylsulfatase family, member I                                       | -0.54 | CACGGGCAATGTGGACTATTA  | XM_291139: | NM_001012301:                            |
| 79642  | ARSJ    | arylsulfatase family, member J                                       | -0.45 | CCGATCCATTATCAACATAAA  | NM_024590: | NM_024590:                               |
| 79642  | ARSJ    | arylsulfatase family, member J                                       | -0.15 | CAGATTGATGAGGACATTCAA  | NM_024590: | NM_024590:                               |
| 153642 | ARSK    | arylsulfatase family, member K                                       | -0.48 | AAGGGTCTAGATCCAAATTAT  | NM_198150: | NM_198150:                               |
| 153642 | ARSK    | arylsulfatase family, member K                                       | -0.57 | AAGCAGTAACTGGTTAAGAA   | NM_198150: | NM_198150:                               |
| 9048   | ARTN    | artemin                                                              | -2.09 | CAGCATTGTAAGGACACATAT  | NM_057090: | NM_003976;NM_057160;NM_057090;NM_057091: |
| 9048   | ARTN    | artemin                                                              | 0.26  | CCCGAACAGGTGAAGGACAAA  | NM_057090: | NM_003976;NM_057160;NM_057090;NM_057091: |
| 51752  | ARTS-1  | type 1 tumor necrosis factor receptor shedding aminopeptidase regula | -1.01 | TCCGAATGTATCATTTGAATAA | NM_016442: | NM_016442:                               |
| 51752  | ARTS-1  | type 1 tumor necrosis factor receptor shedding aminopeptidase regula | 0.25  | TCGGGCAAGTCTCATTAAACA  | NM_016442: | NM_016442:                               |
| 57412  | AS3MT   | arsenic (+3 oxidation state) methyltransferase                       | -0.04 | CCGGCCATAAATGAATTTATT  | NM_020682: | NM_020682:                               |
| 57412  | AS3MT   | arsenic (+3 oxidation state) methyltransferase                       | 0.15  | CAGACCAATAAGAAACAACAAA | NM_020682: | NM_020682:                               |
| 427    | ASAH1   | N-acylsphingosine amidohydrolase (acid ceramidase) 1                 | -3.68 | CACGATTAACGTGGAATGTA   | NM_004315: | NM_177924;NM_004315:                     |
| 427    | ASAH1   | N-acylsphingosine amidohydrolase (acid ceramidase) 1                 | 0.19  | CACGTTCTGTTAATTTAGTAA  | NM_004315: | NM_177924;NM_004315:                     |
| 51665  | ASB1    | ankyrin repeat and SOCS box-containing 1                             | 0.25  | CCGCCTAAGCACTTTAGGAAA  | NM_016114: | NM_016114:                               |
| 51665  | ASB1    | ankyrin repeat and SOCS box-containing 1                             | -3.54 | CAGGAGGGTCTCCCAAGATA   | NM_016114: | NM_016114:                               |
| 51665  | ASB1    | ankyrin repeat and SOCS box-containing 1                             | -8.84 | CAGGAGCTATAGTGAGTGAA   | NM_016154: | NM_016114:                               |
| 136371 | ASB10   | ankyrin repeat and SOCS box-containing 10                            | 0.20  | CCGGTGTGATCTGATGAAGA   | NM_080871: | NM_080871:                               |
| 136371 | ASB10   | ankyrin repeat and SOCS box-containing 10                            | -9.17 | CAGCGCCAACACCCAGGACTA  | NM_080871: | NM_080871:                               |
| 140456 | ASB11   | ankyrin repeat and SOCS box-containing 11                            | -1.44 | CAGGCACCTCTGCTCCGTGAA  | NM_080871: | NM_001012428;NM_080873:                  |
| 140456 | ASB11   | ankyrin repeat and SOCS box-containing 11                            | -1.44 | TAGGATAGCAGAAGAGATCTA  | NM_080873: | NM_080873:                               |
| 79754  | ASB13   | ankyrin repeat and SOCS box-containing 13                            | 0.11  | ATGGCGGGTCTTCTGCTCTAAA | NM_024701: | NM_024701:                               |
| 79754  | ASB13   | ankyrin repeat and SOCS box-containing 13                            | 1.25  | CTGGAGGACTTTCATGATTA   | NM_024701: | NM_024701:                               |
| 142686 | ASB14   | ankyrin repeat and SOCS box-containing 14                            | 0.34  | CTCACTATATATTATAGTAAA  | NM_130387: | NM_130387:                               |
| 142686 | ASB14   | ankyrin repeat and SOCS box-containing 14                            | -0.04 | ACGACCTTTATGAGCAAGGAA  | NM_130387: | NM_130387:                               |
| 142685 | ASB15   | ankyrin repeat and SOCS box-containing 15                            | 0.03  | ATCAACATAAACACTAGCCTA  | NM_080928: | NM_080928:                               |
| 142685 | ASB15   | ankyrin repeat and SOCS box-containing 15                            | 0.60  | TAAGACACTCTGGGAATTCAA  | NM_080928: | NM_080928:                               |
| 127247 | ASB17   | ankyrin repeat and SOCS box-containing 17                            | -0.30 | ACCATCAGGAATCAACTATTA  | NM_080868: | NM_080868:                               |
| 127247 | ASB17   | ankyrin repeat and SOCS box-containing 17                            | 0.82  | CTACTGCAATATGGAATCTTA  | NM_080868: | NM_080868:                               |
| 51676  | ASB2    | ankyrin repeat and SOCS box-containing 2                             | 1.07  | CCGAGGAGGCTGATAGATA    | NM_016150: | NM_016150:                               |
| 51676  | ASB2    | ankyrin repeat and SOCS box-containing 2                             | -0.16 | CGGCGCAACATCGAGCGCTA   | NM_016150: | NM_016150:                               |
| 51130  | ASB3    | ankyrin repeat and SOCS box-containing 3                             | -2.73 | CTGAGGATGATGAAGTTCCA   | NM_016115: | NM_145863;NM_016115:                     |
| 51130  | ASB3    | ankyrin repeat and SOCS box-containing 3                             | 1.56  | TACGGTCTGACAGTTATATA   | NM_016115: | NM_145863;NM_016115:                     |
| 51666  | ASB4    | ankyrin repeat and SOCS box-containing 4                             | 1.12  | CCAGAGGAAATATTATATAA   | NM_016116: | NM_016116:                               |
| 51666  | ASB4    | ankyrin repeat and SOCS box-containing 4                             | -0.98 | CCCGATGATGACTTGGAGAAA  | NM_016116: | NM_016116:                               |
| 140459 | ASB6    | ankyrin repeat and SOCS box-containing 6                             | 0.27  | AAGCTTAAACTATTCATCTTA  | NM_017873: | NM_177999;NM_017873:                     |
| 140459 | ASB6    | ankyrin repeat and SOCS box-containing 6                             | -0.87 | CAGGGCTAGACACGAAAGCTTA | NM_017873: | NM_177999;NM_017873:                     |
| 140460 | ASB7    | ankyrin repeat and SOCS box-containing 7                             | -0.32 | CACAAGTATGTAATATAATTA  | NM_024708: | NM_024708:                               |
| 140460 | ASB7    | ankyrin repeat and SOCS box-containing 7                             | 0.09  | ACGCTTGATGTAGAAATCTGA  | NM_024708: | NM_198243;NM_024708:                     |
| 140461 | ASB8    | ankyrin repeat and SOCS box-containing 8                             | 0.38  | CCTATTGATGCTGGTGTTTAA  | NM_024095: | NM_024095:                               |
| 140461 | ASB8    | ankyrin repeat and SOCS box-containing 8                             | 0.96  | TAGGAAGATGGAAGACTACTTA | NM_024095: | NM_024095:                               |
| 140462 | ASB9    | ankyrin repeat and SOCS box-containing 9                             | 0.54  | CTGCATACGTTTGTATTATTA  | NM_024087: | NM_024087;NM_001031739:                  |
| 140462 | ASB9    | ankyrin repeat and SOCS box-containing 9                             | 0.49  | TAGATTGATTTGTTATAAAA   | NM_024087: | NM_024087;NM_001031739:                  |
| 84164  | ASCC2   | activating signal cointegrator 1 complex subunit 2                   | -1.26 | CAGGAAGAAGGAAGCCAAACA  | NM_032204: | NM_032204:                               |
| 84164  | ASCC2   | activating signal cointegrator 1 complex subunit 2                   | -0.35 | CACGGCGAGTTGCTGAACGAA  | NM_032204: | NM_032204:                               |
| 429    | ASCL1   | achaete-scute complex-like 1 (Drosophila)                            | 0.51  | ACAACTAGTTTCTGTAATAAA  | NM_004316: | NM_004316:                               |
| 429    | ASCL1   | achaete-scute complex-like 1 (Drosophila)                            | -0.49 | CCGCCCTTCTTAAAGTGCA    | NM_004316: | NM_004316:                               |
| 430    | ASCL2   | achaete-scute complex-like 2 (Drosophila)                            | 0.55  | AGGGAGCGTGAACCTTATAAAA | NM_005170: | NM_005170:                               |
| 430    | ASCL2   | achaete-scute complex-like 2 (Drosophila)                            | 0.33  | GAGGGTTATCTATACATTTAA  | NM_005170: | NM_005170:                               |
| 432    | ASGR1   | asialoglycoprotein receptor 1                                        | 0.25  | CAGGTTATCATTTGGAACCTT  | NM_001671: | NM_001671:                               |
| 432    | ASGR1   | asialoglycoprotein receptor 1                                        | -2.63 | TCCGAAGGTGAGGAGCTTGAA  | NM_001671: | NM_001671:                               |
| 433    | ASGR2   | asialoglycoprotein receptor 2                                        | -5.33 | CACGAGCTGGTGGAAAGTAAA  | NM_080914: | NM_080914;NM_080913;NM_080912;NM_001181: |
| 433    | ASGR2   | asialoglycoprotein receptor 2                                        | 0.10  | GAGCAGAAATTCATTTGACAAA | NM_080914: | NM_080914;NM_080913;NM_080912;NM_001181: |
| 55870  | ASH1L   | ash1 (absent, small, or homeotic)-like (Drosophila)                  | -0.45 | ACGGTAGTCTTGCATTAATT   | NM_018489: | NM_018489:                               |
| 55870  | ASH1L   | ash1 (absent, small, or homeotic)-like (Drosophila)                  | 1.09  | TCGACTGTTATCTCACATTTAA | NM_018489: | NM_018489:                               |
| 9070   | ASH2L   | ash2 (absent, small, or homeotic)-like (Drosophila)                  | 0.05  | CCCGTTTAAACAAGATGGCTA  | NM_004674: | NM_004674:                               |
| 9070   | ASH2L   | ash2 (absent, small, or homeotic)-like (Drosophila)                  | 1.88  | CCGAGTAACTAACTATTTTAA  | NM_004674: | NM_004674:                               |
| 438    | ASMT    | acetylserotonin O-methyltransferase                                  | 0.09  | CAAGACATAATAAAGAGACA   | NM_004043: | NM_004043:                               |
| 438    | ASMT    | acetylserotonin O-methyltransferase                                  | 0.93  | AGCACACAGACATAATAATA   | NM_004043: | NM_004043:                               |
| 440    | ASNS    | asparagine synthetase                                                | 0.83  | ATGGTGAATCTACAACCCATA  | NM_001673: | NM_133436;NM_183356;NM_001673:           |
| 440    | ASNS    | asparagine synthetase                                                | -0.51 | TCCGATTGTTGGCTCTGTTA   | NM_001673: | NM_133436;NM_183356;NM_001673:           |
| 54529  | ASNSD1  | asparagine synthetase domain containing 1                            | -2.08 | GCGGACTAAAGGAACACTACAA | NM_019048: | NM_019048:                               |
| 54529  | ASNSD1  | asparagine synthetase domain containing 1                            | 0.81  | TCAGAATTGATCTTAAGTCTA  | NM_019048: | NM_019048:                               |

|        |          |                                                                      |       |                        |            |                                          |
|--------|----------|----------------------------------------------------------------------|-------|------------------------|------------|------------------------------------------|
| 443    | ASPA     | aspartoacylase (Canavan disease)                                     | 0.50  | TACATCTTACACGGTGTCTTA  | NM_000049: | NM_000049:                               |
| 443    | ASPA     | aspartoacylase (Canavan disease)                                     | -3.34 | CTGCGCATTGAGGCTATATA   | NM_000049: | NM_000049:                               |
| 444    | ASPH     | aspartate beta-hydroxylase                                           | -0.16 | ACGCAGCCTCCAGCAATTTA   | NM_004318: | NM_004318:                               |
| 444    | ASPH     | aspartate beta-hydroxylase                                           | -1.27 | CGGGTACACAGAGTTAGTAA   | NM_004318: | NM_004318:                               |
| 259266 | ASPM     | asp (abnormal spindle)-like, microcephaly associated (Drosophila)    | 0.00  | AAGATTGAGCATGAAGGTCAA  | NM_018136: | NM_018136:                               |
| 259266 | ASPM     | asp (abnormal spindle)-like, microcephaly associated (Drosophila)    | -0.02 | ACGCTATATGTCCAGCGTACTA | NM_018136: | NM_018136:                               |
| 445    | ASS      | argininosuccinate synthetase                                         | -3.75 | CCCCTGGAGCATGGATGAGAA  | NM_000050: | NM_000050.NM_054012:                     |
| 445    | ASS      | argininosuccinate synthetase                                         | -3.17 | CTGATGGATACGCAAAAGCAA  | NM_000050: | NM_000050.NM_054012:                     |
| 29028  | ATAD2    | ATPase family, AAA domain containing 2                               | 0.33  | AAGGCATTATAAAGATCGAA   | NM_014109: | NM_014109:                               |
| 29028  | ATAD2    | ATPase family, AAA domain containing 2                               | 0.14  | CGGGATAAAGAAAGAACGGACA | NM_014109: | NM_014109:                               |
| 466    | ATF1     | activating transcription factor 1                                    | 0.03  | CTGCCAATAAATTTCTAAATTA | NM_005171: | NM_005171:                               |
| 466    | ATF1     | activating transcription factor 1                                    | 0.57  | AACCTAGTACATTTACTAAATA | NM_005171: | NM_005171:                               |
| 1386   | ATF2     | activating transcription factor 2                                    | -0.40 | CGGGGTGACCGAAAGGATCA   | NM_001880: | NM_001880:                               |
| 1386   | ATF2     | activating transcription factor 2                                    | 1.68  | TCCATTGAGAATGAATTCAA   | NM_001880: | NM_001880:                               |
| 9474   | ATG5     | ATG5 autophagy related 5 homolog (S. cerevisiae)                     | 1.60  | CTAGGAGATCTCCTCAAAGAA  | NM_004849: | NM_004849:                               |
| 9474   | ATG5     | ATG5 autophagy related 5 homolog (S. cerevisiae)                     | -0.08 | TCCAACCTGTTTCCACGCTATA | NM_004849: | NM_004849:                               |
| 472    | ATM      | ataxia telangiectasia mutated (includes complementation groups A, C  | 1.68  | AACCATGAGTCTAGTACTTAA  | NM_000051: | NM_000051:                               |
| 472    | ATM      | ataxia telangiectasia mutated (includes complementation groups A, C  | -0.05 | CACCTGTTTGTAGTTTATA    | NM_000051: | NM_000051.NM_138292:                     |
| 1822   | ATN1     | atrophin 1                                                           | 0.49  | CACATAAATTTATATATA     | NM_001940: | NM_001940:                               |
| 1822   | ATN1     | atrophin 1                                                           | -1.59 | CACCCTTGCACGAGAACGAA   | NM_001940: | NM_001007026.NM_001940:                  |
| 474    | ATOH1    | atoh1 homolog 1 (Drosophila)                                         | -0.57 | AACGACAAGAAAGCTGCCAAA  | NM_005172: | NM_005172:                               |
| 474    | ATOH1    | atoh1 homolog 1 (Drosophila)                                         | -0.57 | AAGGAGGAAAACAGCAAACT   | NM_005172: | NM_005172:                               |
| 479    | ATP12A   | ATPase, H+/K+ transporting, nongastric, alpha polypeptide            | -0.36 | TTGCAGCACCATCATGATCAA  | NM_001676: | NM_001676:                               |
| 479    | ATP12A   | ATPase, H+/K+ transporting, nongastric, alpha polypeptide            | -1.34 | TTGGCGTACGAGAAAGCTGAA  | NM_001676: | NM_001676:                               |
| 84239  | ATP13A4  | ATPase type 13A4                                                     | -0.70 | CGGGATAAGGACTGTAATGAT  | NM_032279: | NM_032279:                               |
| 476    | ATP1A1   | ATPase, Na+/K+ transporting, alpha 1 polypeptide                     | 0.13  | CCCCGAAAGACTGAAAGAAATA | NM_000701: | NM_001001586.NM_000701:                  |
| 476    | ATP1A1   | ATPase, Na+/K+ transporting, alpha 1 polypeptide                     | 0.67  | CTTGATGAACCTCATCGTAAA  | NM_000701: | NM_001001586.NM_000701:                  |
| 477    | ATP1A2   | ATPase, Na+/K+ transporting, alpha 2 (+) polypeptide                 | 0.24  | CAGATTAGACACTATGTGTTA  | NM_000702: | NM_000702:                               |
| 477    | ATP1A2   | ATPase, Na+/K+ transporting, alpha 2 (+) polypeptide                 | -1.40 | CGGATTAATGGAGACTACTA   | NM_000702: | NM_000702:                               |
| 478    | ATP1A3   | ATPase, Na+/K+ transporting, alpha 3 polypeptide                     | -0.03 | CTGGACAATTTCAAAATATAT  | NM_152296: | NM_152296:                               |
| 478    | ATP1A3   | ATPase, Na+/K+ transporting, alpha 3 polypeptide                     | 0.61  | CTGGTCTGGACAAATATCAA   | NM_152296: | NM_152296:                               |
| 480    | ATP1A4   | ATPase, Na+/K+ transporting, alpha 4 polypeptide                     | -2.04 | CGGGCTGACTTTAAGGCTAA   | NM_144699: | NM_144699:                               |
| 480    | ATP1A4   | ATPase, Na+/K+ transporting, alpha 4 polypeptide                     | -0.29 | CTCAATGAAAGATGAAATGAA  | NM_144699: | NM_144699:                               |
| 487    | ATP2A1   | ATPase, Ca++ transporting, cardiac muscle, fast twitch 1             | 0.89  | TGGGAACCTAGAGGGGATA    | NM_004320: | NM_004320:                               |
| 487    | ATP2A1   | ATPase, Ca++ transporting, cardiac muscle, fast twitch 1             | -0.61 | CCCGATAGTGACACATCTTCA  | NM_004320: | NM_004320.NM_173201:                     |
| 488    | ATP2A2   | ATPase, Ca++ transporting, cardiac muscle, slow twitch 2             | -0.42 | AAGCAGGACATCAATGAGCAA  | NM_001681: | NM_001681.NM_170665:                     |
| 488    | ATP2A2   | ATPase, Ca++ transporting, cardiac muscle, slow twitch 2             | 1.45  | AAGGTGACTGTTCCCTTA     | NM_001681: | NM_001681.NM_170665:                     |
| 489    | ATP2A3   | ATPase, Ca++ transporting, ubiquitous                                | -0.09 | CGCCTGTAACACGGTCATCAA  | NM_174958: | NM_174958.NM_174953.NM_174954.NM_174955: |
| 489    | ATP2A3   | ATPase, Ca++ transporting, ubiquitous                                | 1.73  | CACCAATACACATCGGGCAA   | NM_174958: | NM_174958.NM_005173.NM_174957:           |
| 490    | ATP2B1   | ATPase, Ca++ transporting, plasma membrane 1                         | 0.61  | TCGCATTATATAGTATGTATA  | NM_001682: | NM_001001323.NM_001682:                  |
| 490    | ATP2B1   | ATPase, Ca++ transporting, plasma membrane 1                         | 1.75  | AGGACCGTGATGATATTTGTA  | NM_001682: | NM_001001323.NM_001682:                  |
| 491    | ATP2B2   | ATPase, Ca++ transporting, plasma membrane 2                         | -1.92 | CGGGACGAGATGGTAAAGAA   | NM_001683: | NM_001683.NM_001001331:                  |
| 491    | ATP2B2   | ATPase, Ca++ transporting, plasma membrane 2                         | 1.25  | TGAGGTAGTGTGAAATATTA   | NM_001683: | NM_001683.NM_001001331:                  |
| 492    | ATP2B3   | ATPase, Ca++ transporting, plasma membrane 3                         | 0.85  | CACAGATACGTAATAATTTAA  | NM_021949: | NM_021949.NM_001001344:                  |
| 492    | ATP2B3   | ATPase, Ca++ transporting, plasma membrane 3                         | 1.05  | CGGAGAGCAAGCTTTACAAA   | NM_021949: | NM_021949.NM_001001344:                  |
| 493    | ATP2B4   | ATPase, Ca++ transporting, plasma membrane 4                         | -1.13 | TTGTCTAAGCTAGGAACTCA   | NM_001684: | NM_001684.NM_001001396:                  |
| 493    | ATP2B4   | ATPase, Ca++ transporting, plasma membrane 4                         | 0.80  | CGGACTACTGCTAGCTTAA    | NM_001684: | NM_001684.NM_001001396:                  |
| 27032  | ATP2C1   | ATPase, Ca++ transporting, type 2C, member 1                         | -2.02 | TACGATTAATAAGTCAAGCTAA | NM_014382: | NM_014382:                               |
| 27032  | ATP2C1   | ATPase, Ca++ transporting, type 2C, member 1                         | -1.77 | TAGGTAACAGTGCCTAATA    | NM_014382: | NM_014382:                               |
| 495    | ATP4A    | ATPase, H+/K+ exchanging, alpha polypeptide                          | -0.31 | CAGGAATAAGATCTGGTGTAT  | NM_000704: | NM_000704:                               |
| 495    | ATP4A    | ATPase, H+/K+ exchanging, alpha polypeptide                          | 1.23  | CAGTAAGAATCTCGGTGGTCAA | NM_000704: | NM_000704:                               |
| 496    | ATP4B    | ATPase, H+/K+ exchanging, beta polypeptide                           | -0.57 | AGGCAGCAACTCTAATAATA   | NM_000705: | NM_000705:                               |
| 496    | ATP4B    | ATPase, H+/K+ exchanging, beta polypeptide                           | 0.66  | TTGCAATCTCAAGTTGTAATA  | NM_000705: | NM_000705:                               |
| 496    | ATP4B    | ATPase, H+/K+ exchanging, beta polypeptide                           | 0.37  | AGGCAGCAACTCTAATAATA   | NM_000705: | NM_000705:                               |
| 496    | ATP4B    | ATPase, H+/K+ exchanging, beta polypeptide                           | 0.36  | TTGCAATCTCAAGTTGTAATA  | NM_000705: | NM_000705:                               |
| 498    | ATP5A1   | ATP synthase, H+ transporting, mitochondrial F1 complex, alpha subu  | -2.33 | TTGGTGGATTTGAAGCTTAA   | NM_000406: | NM_001001935.NM_000406.NM_001001937:     |
| 498    | ATP5A1   | ATP synthase, H+ transporting, mitochondrial F1 complex, alpha subu  | -1.49 | CCCGATTGGTGAAGAGACTTAA | NM_000406: | NM_001001935.NM_000406.NM_001001937:     |
| 506    | ATP5B    | ATP synthase, H+ transporting, mitochondrial F1 complex, beta polype | 0.87  | ACCCGTGAAGCAATGATTTAA  | NM_001686: | NM_001686:                               |
| 506    | ATP5B    | ATP synthase, H+ transporting, mitochondrial F1 complex, beta polype | -1.90 | AAGAATTAACCACTCAACAGAA | NM_001686: | NM_001686:                               |
| 10159  | ATP6AP2  | ATPase, H+ transporting, lysosomal accessory protein 2               | -1.79 | ATGGCTAATATGGACTACTAA  | NM_005765: | NM_005765:                               |
| 10159  | ATP6AP2  | ATPase, H+ transporting, lysosomal accessory protein 2               | 0.06  | AAGAGTGTATATGGTAGGGAA  | NM_005765: | NM_005765:                               |
| 523    | ATP6V1A  | ATPase, H+ transporting, lysosomal 70kDa, V1 subunit A               | 0.04  | ATGGAGGTGTAGGTAAGGTA   | NM_001690: | NM_001690:                               |
| 523    | ATP6V1A  | ATPase, H+ transporting, lysosomal 70kDa, V1 subunit A               | -3.12 | ACCACAATTTGTAGTACATAA  | NM_001690: | NM_001690:                               |
| 525    | ATP6V1B1 | ATPase, H+ transporting, lysosomal 56/58kDa, V1 subunit B1 (Renal I  | 0.51  | CCCCGCAAGTGGTCCCACTTA  | NM_001692: | NM_001692:                               |
| 525    | ATP6V1B1 | ATPase, H+ transporting, lysosomal 56/58kDa, V1 subunit B1 (Renal I  | -4.71 | CGGGCTCAAGTTGGCCAGTAA  | NM_001692: | NM_001692:                               |
| 526    | ATP6V1B2 | ATPase, H+ transporting, lysosomal 56/58kDa, V1 subunit B2           | -1.53 | CTCGATTACTCAATCCCTAT   | NM_001693: | NM_001693:                               |
| 526    | ATP6V1B2 | ATPase, H+ transporting, lysosomal 56/58kDa, V1 subunit B2           | -1.37 | CAGGCTGGTTGGTAAAGAAA   | NM_001693: | NM_001693:                               |
| 528    | ATP6V1C1 | ATPase, H+ transporting, lysosomal 42kDa, V1 subunit C1              | -0.26 | AAGGTTTGAATCCAGCATATA  | NM_001695: | NM_001695.NM_001007254:                  |
| 528    | ATP6V1C1 | ATPase, H+ transporting, lysosomal 42kDa, V1 subunit C1              | 1.40  | ATGTCATTAATCCATTTGTTA  | NM_001695: | NM_001695.NM_001007254:                  |
| 538    | ATP7A    | ATPase, Cu++ transporting, alpha polypeptide (Menkes syndrome)       | 0.32  | TAGCAGCTTGTAGTATTTGAAA | NM_000052: | NM_000052:                               |
| 538    | ATP7A    | ATPase, Cu++ transporting, alpha polypeptide (Menkes syndrome)       | -0.69 | CAGCCAGTATTTCTCCATTA   | NM_000052: | NM_000052:                               |
| 540    | ATP7B    | ATPase, Cu++ transporting, beta polypeptide                          | 1.19  | ACCAGGTTGGATCAACAAA    | NM_000053: | NM_000053.NM_001005918:                  |
| 540    | ATP7B    | ATPase, Cu++ transporting, beta polypeptide                          | 0.86  | ACCCCTGGTGAAGCAATTTA   | NM_000053: | NM_000053.NM_001005918:                  |
| 10079  | ATP9A    | ATPase, Class II, type 9A                                            | 1.17  | CTCAAGTTCCATTTATATATA  | XM_030577: | NM_006045:                               |
| 10079  | ATP9A    | ATPase, Class II, type 9A                                            | 0.96  | ATGTATTGAGTGAATAGTTAA  | XM_030577: | NM_006045:                               |
| 545    | ATR      | ataxia telangiectasia and Rad3 related                               | -0.96 | CAGGCACTAATTTGCTTCTCAA | NM_001184: | NM_001184:                               |
| 545    | ATR      | ataxia telangiectasia and Rad3 related                               | 0.04  | CGCTAATCTTCAACATTTAA   | NM_001184: | NM_001184:                               |
| 8455   | ATRNL    | attractin                                                            | 0.24  | GAGAGGAATATTTCAACTTAA  | NM_012070: | NM_139321.NM_139322.NM_012070:           |
| 8455   | ATRNL    | attractin                                                            | -0.36 | CCAGATGTGGACCATTCTTAA  | NM_012070: | NM_139321.NM_139322.NM_012070:           |
| 26033  | ATRNL1   | attractin-like 1                                                     | 1.90  | TTGGTGTAGTGAAGGTCAA    | NM_207303: | NM_207303:                               |
| 26033  | ATRNL1   | attractin-like 1                                                     | -2.23 | CAGCTTCCCGCTAACTAGAAA  | NM_207303: | NM_207303:                               |
| 546    | ATRX     | alpha thalassemia/mental retardation syndrome X-linked (RAD54 hom    | 0.77  | AGGCGAGCTTAAAGGTTCAA   | NM_000489: | NM_000489.NM_138271.NM_138270:           |
| 546    | ATRX     | alpha thalassemia/mental retardation syndrome X-linked (RAD54 hom    | -1.94 | CCGACAGAACTAACCCCTGTA  | NM_000489: | NM_000489.NM_138271.NM_138270:           |
| 4287   | ATXN3    | ataxin 3                                                             | 1.23  | TACGATGGGATCATTATTTCA  | NM_004993: | NM_0030660.NM_004993.NM_001024631:       |
| 4287   | ATXN3    | ataxin 3                                                             | 1.14  | TGGCTCGGTTGTAGGACTAAA  | NM_004993: | NM_0030660.NM_004993.NM_001024631:       |
| 92552  | ATXN3L   | ataxin 3-like                                                        | 1.45  | AAGCTCGGCTGATGCTCTATA  | XM_045705: | XM_045705:                               |
| 92552  | ATXN3L   | ataxin 3-like                                                        | -2.03 | CTCGATTACAAACAAGCAT    | XM_045705: | XM_045705:                               |
| 550    | AUP1     | (ancient) ancient ubiquitous protein 1                               | 0.84  | CCCAATGTCACTAATAATTTCA | NM_012103: | NM_012103.NM_181576.NM_181575:           |
| 550    | AUP1     | (ancient) ancient ubiquitous protein 1                               | -1.64 | CAGGAGCGCAAGCAAGCACTA  | NM_012103: | NM_012103.NM_181576.NM_181575:           |
| 6790   | AURKA    | aurora kinase A                                                      | -6.85 | CACCTTCGGCATCTTAATATT  | NM_003600: | NM_198433.NM_003600.NM_198435.NM_198434: |
| 6790   | AURKA    | aurora kinase A                                                      | 0.50  | CACGTGCTACCTCCATTTA    | NM_003600: | NM_198433.NM_003600.NM_198435.NM_198434: |
| 54998  | AURKAIP1 | aurora kinase A interacting protein 1                                | -0.13 | ATCCGTAGTAATAAATTTCTCA | NM_017900: | NM_017900:                               |
| 54998  | AURKAIP1 | aurora kinase A interacting protein 1                                | -2.79 | CTGCTGTGATCCGATGTAATA  | NM_017900: | NM_017900:                               |
| 9212   | AURKB    | aurora kinase B                                                      | -1.96 | AACGGCGCACTTCACAATTGA  | NM_004217: | NM_004217:                               |
| 9212   | AURKB    | aurora kinase B                                                      | -4.97 | ACGGCGCACTTCACAATTGAT  | NM_004217: | NM_004217:                               |

|       |                |                                                                         |       |                        |                      |                                          |
|-------|----------------|-------------------------------------------------------------------------|-------|------------------------|----------------------|------------------------------------------|
| 6795  | AURKC          | aurora kinase C                                                         | 1.82  | AAGATGTAAGATGCTAATTA   | NM_003160:           | NM_001015878:NM_001015879:NM_003160:     |
| 6795  | AURKC          | aurora kinase C                                                         | -0.09 | CCGGGTGACCTGATTCTCGGA  | NM_003160:           | NM_001015878:NM_001015879:NM_003160:     |
| 551   | AVP            | arginine vasopressin (neurophysin II, antidiuretic hormone, diabetes in | -0.63 | CCCTCGCAGCAGCGAATAA    | NM_000490:           | NM_000490:                               |
| 551   | AVP            | arginine vasopressin (neurophysin II, antidiuretic hormone, diabetes in | -0.02 | CAATAAACCTCCGCAATGCA   | NM_000490:           | NM_000490:                               |
| 552   | AVPR1A         | arginine vasopressin receptor 1A                                        | -0.01 | ATGAACGGACTGGTAGTAAA   | NM_000706:           | NM_000706:                               |
| 552   | AVPR1A         | arginine vasopressin receptor 1A                                        | -2.45 | TGCAAAACATAGGGTAATAA   | NM_000706:           | NM_000706:                               |
| 553   | AVPR1B         | arginine vasopressin receptor 1B                                        | -1.53 | CAGCATGTTGGCTCCACCTA   | NM_000707:           | NM_000707:                               |
| 553   | AVPR1B         | arginine vasopressin receptor 1B                                        | -1.86 | CTGGATCTACATGGGCTTCAA  | NM_000707:           | NM_000707:                               |
| 554   | AVPR2          | arginine vasopressin receptor 2 (nephrogenic diabetes insipidus)        | 0.01  | CAGCCTCAACAGCTGCACCAA  | NM_000054:           | NM_000054:                               |
| 554   | AVPR2          | arginine vasopressin receptor 2 (nephrogenic diabetes insipidus)        | -0.04 | CCTCATTCTCCCTAATAAAA   | NM_000054:           | NM_000054:                               |
| 8312  | AXIN1          | axin 1                                                                  | -5.04 | CAGCTACAGATACTACTTCAA  | NM_003502:NM_181050: | NM_003502:NM_181050:                     |
| 8312  | AXIN1          | axin 1                                                                  | 0.72  | CAGCATCGTTGTGGCGTACTA  | NM_003502:           | NM_003502:NM_181050:                     |
| 8313  | AXIN2          | axin 2 (conductin, axil)                                                | 0.81  | CAGTGAGTTGGTTGTCACTTA  | NM_004655:           | NM_004655:                               |
| 8313  | AXIN2          | axin 2 (conductin, axil)                                                | -0.23 | AGGGATCCTGTTAATCCTTAT  | NM_004655:           | NM_004655:                               |
| 558   | AXL            | AXL receptor tyrosine kinase                                            | 2.95  | CCGGTGTCTTAGATGTGATA   | NM_001699:           | NM_001699:NM_021913:                     |
| 558   | AXL            | AXL receptor tyrosine kinase                                            | 1.81  | TCCAAGATTCTAGATGATTA   | NM_001699:           | NM_001699:NM_021913:                     |
| 51582 | AZIN1          | antizyme inhibitor 1                                                    | -0.52 | ATCATAGTATTGTTGACCTA   | NM_015878:           | NM_015878:NM_148174:                     |
| 51582 | AZIN1          | antizyme inhibitor 1                                                    | -2.04 | CAGGTTAAGCTTGTCTGGTCA  | NM_015878:           | NM_015878:NM_148174:                     |
| 566   | AZU1           | azurocidin 1 (cationic antimicrobial protein 37)                        | -1.75 | CTGGATCGATGGTGTCTCAA   | NM_001700:           | NM_001700:                               |
| 566   | AZU1           | azurocidin 1 (cationic antimicrobial protein 37)                        | -0.56 | CTGGCTCAGTTCAGAAATCAA  | NM_001700:           | NM_001700:                               |
| 567   | B2M            | (beta-2-microglobulin)                                                  | -6.79 | AAGTGGGATCGAGACATGTAA  | NM_004048:           | NM_004048:                               |
| 567   | B2M            | (beta-2-microglobulin)                                                  | 0.80  | TCCGACATTGAAGTTGACTTA  | NM_004048:           | NM_004048:                               |
| 2583  | B4GALNT1       | beta-1,4-N-acetyl-galactosaminyl transferase 1                          | 1.41  | CACCAAGACTTCCCTCCGTTA  | NM_001478:           | NM_001478:                               |
| 2583  | B4GALNT1       | beta-1,4-N-acetyl-galactosaminyl transferase 1                          | 0.00  | CAGAGGGACTCAAGAACCTA   | NM_001478:           | NM_001478:                               |
| 2683  | B4GALT1        | UDP-Gal:betaGlcNAc beta 1,4-galactosyltransferase, polypeptide 1        | 0.63  | CCCAAGAACTCGGCTCCTAAA  | NM_001497:           | NM_001497:                               |
| 2683  | B4GALT1        | UDP-Gal:betaGlcNAc beta 1,4-galactosyltransferase, polypeptide 1        | 1.61  | CACAAATAGGCTATGATTA    | NM_001497:           | NM_001497:                               |
| 23621 | BACE1          | beta-site APP-cleaving enzyme 1                                         | -0.13 | ACCAAAACAACCTGGTGTGAA  | NM_012104:           | NM_138973:NM_138972:NM_138971:NM_012104: |
| 23621 | BACE1          | beta-site APP-cleaving enzyme 1                                         | -1.16 | CCGAAGATCATTCTACAAGTA  | NM_012104:           | NM_138973:NM_138972:NM_138971:NM_012104: |
| 25825 | BACE2          | beta-site APP-cleaving enzyme 2                                         | 1.15  | TACATGTCCACCAACATAAA   | NM_012105:           | NM_138992:NM_138991:NM_012105:           |
| 25825 | BACE2          | beta-site APP-cleaving enzyme 2                                         | 0.43  | AACCTGAAAGTCAGTATTTAA  | NM_012105:           | NM_138992:NM_138991:NM_012105:           |
| 60468 | BACH2 (BTB)    | BTB and CNC homology 1, basic leucine zipper transcription factor 2     | -1.70 | CACGAGGCAATGTGGTTGAA   | NM_021813:           | NM_021813:                               |
| 60468 | BACH2 (BTB)    | BTB and CNC homology 1, basic leucine zipper transcription factor 2     | -0.20 | CAGGTGATAATTATGTAGGAA  | NM_021813:           | NM_021813:                               |
| 572   | BAD            | BCL2-antagonist of cell death                                           | -0.13 | ACGAGTTTGTGGACTCCTTTA  | AK023420:            | NM_043229:NM_032989:                     |
| 573   | BAG1 (BCL2)    | BCL2-associated athanogene                                              | -0.01 | CCGTCTCTGGATCGGAATTTA  | NM_004323:           | NM_004323:                               |
| 573   | BAG1 (BCL2)    | BCL2-associated athanogene                                              | -0.25 | TGTGATCGGAATTTACCTGAT  | NM_004323:           | NM_004323:                               |
| 9532  | BAG2           | BCL2-associated athanogene 2                                            | 0.44  | CAGGCGAAGATCAACGCTAAA  | NM_004282:           | NM_004282:                               |
| 9532  | BAG2           | BCL2-associated athanogene 2                                            | 0.98  | TCAGGCGAAGATCAACGCTAAA | NM_004282:           | NM_004282:                               |
| 9531  | BAG3           | BCL2-associated athanogene 3                                            | -0.50 | CCCAATTCAAGTATCGCGAA   | NM_004281:           | NM_004281:                               |
| 9531  | BAG3           | BCL2-associated athanogene 3                                            | 0.10  | CCGCAAGAGGATGGATTTCTAA | NM_004281:           | NM_004281:                               |
| 9530  | BAG4           | BCL2-associated athanogene 4                                            | 0.77  | CAACATATACCTCATGTGTA   | NM_004874:           | NM_004874:                               |
| 9530  | BAG4           | BCL2-associated athanogene 4                                            | -0.02 | CTGGATATACTCGAGACAAA   | NM_004874:           | NM_004874:                               |
| 9529  | BAG5           | BCL2-associated athanogene 5                                            | 1.16  | AAGGAGATATTCAGCAAGCTA  | NM_004873:           | NM_001015049:NM_004873:NM_001015048:     |
| 9529  | BAG5           | BCL2-associated athanogene 5                                            | -0.56 | CCGGATATTCTACTCCTGCA   | NM_004873:           | NM_001015049:NM_004873:NM_001015048:     |
| 575   | BAI1 (brain-sj | brain-specific angiogenesis inhibitor 1                                 | 0.81  | CCGCTGTGTTTCCATGACTA   | NM_001702:           | NM_001702:                               |
| 575   | BAI1 (brain-sj | brain-specific angiogenesis inhibitor 1                                 | 0.78  | CCGGAACCGCCTCATCCGCAA  | NM_001702:           | NM_001702:                               |
| 576   | BAI2 (brain-sj | brain-specific angiogenesis inhibitor 2                                 | 0.35  | CCGGAACGAAAGGATACGGAA  | NM_001703:           | NM_001703:                               |
| 576   | BAI2 (brain-sj | brain-specific angiogenesis inhibitor 2                                 | 0.20  | CTCTCTGATGTCCACAGATA   | NM_001703:           | NM_001703:                               |
| 577   | BAI3           | brain-specific angiogenesis inhibitor 3                                 | 1.42  | ATGGACTAAGTAGAGACAAA   | NM_001704:           | NM_001704:                               |
| 577   | BAI3           | brain-specific angiogenesis inhibitor 3                                 | -0.76 | TTGGATGATAATGCAGGACTA  | NM_001704:           | NM_001704:                               |
| 10458 | BAIAP2         | BAI1-associated protein 2                                               | -0.85 | CTGCTTCTCCTCGCTAATAA   | NM_006340:           | NM_006340:                               |
| 10458 | BAIAP2         | BAI1-associated protein 2                                               | -4.72 | CAGCAAGAATCCTCAGAAGTA  | NM_006340:           | NM_017450:NM_017451:NM_006340:           |
| 55971 | BAIAP2L1       | BAI1-associated protein 2-like 1                                        | 0.01  | CACGGAGAGCACTCCGGGAA   | NM_018842:           | NM_018842:                               |
| 55971 | BAIAP2L1       | BAI1-associated protein 2-like 1                                        | 0.68  | CTCAACGAGAGCTTGTATGAA  | NM_018842:           | NM_018842:                               |
| 8938  | BAIAP3         | BAI1-associated protein 3                                               | 0.84  | TGGGATCATGACGACGATGTA  | NM_003933:           | NM_003933:                               |
| 8938  | BAIAP3         | BAI1-associated protein 3                                               | 0.64  | GTGACCTTGTGCGACATTTAA  | NM_003933:           | NM_003933:                               |
| 578   | BAK1           | BCL2-antagonist/killer 1                                                | -4.14 | AACCCATCACTACAGGTGAA   | NM_001188:           | NM_001188:                               |
| 578   | BAK1           | BCL2-antagonist/killer 1                                                | -2.14 | CAGGATTCAGTATTCTGGAA   | NM_001188:           | NM_001188:                               |
| 8314  | BAP1           | BRCA1 associated protein-1 (ubiquitin carboxy-terminal hydrolase)       | 0.45  | CTCAATTCCTCTGCCATCAA   | NM_004656:           | NM_004656:                               |
| 8314  | BAP1           | BRCA1 associated protein-1 (ubiquitin carboxy-terminal hydrolase)       | -0.34 | CCCGTGTGTGCTGGAAGCAAA  | NM_004656:           | NM_004656:                               |
| 580   | BARD1 (BRC     | BRCA1 associated RING domain 1                                          | 0.01  | CTGAATATTATACCAGATGAA  | NM_000465:           | NM_000465:                               |
| 580   | BARD1 (BRC     | BRCA1 associated RING domain 1                                          | 0.79  | GACCATCAATACAGTCGCATA  | NM_000465:           | NM_000465:                               |
| 7917  | BAT3           | HLA-B associated transcript 3                                           | -2.25 | CAGCTCCGCTGATATACAA    | NM_004639:           | NM_080703:NM_080702:NM_004639:           |
| 7917  | BAT3           | HLA-B associated transcript 3                                           | 0.02  | CCGGTGTCTGGAGTTGGTAA   | NM_004639:           | NM_080703:NM_080702:NM_004639:           |
| 581   | BAX            | BCL2-associated X protein                                               | -1.35 | ATCATCAGATGTGGTCTATA   | NM_004324:           | NM_004324:                               |
| 581   | BAX            | BCL2-associated X protein                                               | -0.91 | CAGCTCTGAGCAGATCATGAA  | NM_004324:           | NM_004324:NM_138765:NM_138763:NM_138764: |
| 11177 | BAZ1A          | bromodomain adjacent to zinc finger domain, 1A                          | -0.61 | AACCTCGTAACCAAGTGAA    | NM_013448:           | NM_182648:NM_013448:                     |
| 11177 | BAZ1A          | bromodomain adjacent to zinc finger domain, 1A                          | 0.12  | CACAAGTTAGATTGCCAGTTA  | NM_013448:           | NM_182648:NM_013448:                     |
| 9031  | BAZ1B          | bromodomain adjacent to zinc finger domain, 1B                          | 0.41  | CCGGTCTATTTCATAGAGAA   | NM_023005:NM_032408: | NM_023005:NM_032408:                     |
| 9031  | BAZ1B          | bromodomain adjacent to zinc finger domain, 1B                          | 0.56  | CAGATGCTCAGTATCCTATTA  | NM_023005:           | NM_023005:NM_032408:                     |
| 11176 | BAZ2A          | bromodomain adjacent to zinc finger domain, 2A                          | -1.28 | CTCGGTAGCTTTGAATCTTAA  | NM_013449:           | NM_013449:                               |
| 11176 | BAZ2A          | bromodomain adjacent to zinc finger domain, 2A                          | 1.82  | CCCGCAGTGACGGCCAGTAAA  | NM_013449:           | NM_013449:                               |
| 29994 | BAZ2B          | bromodomain adjacent to zinc finger domain, 2B                          | 0.45  | AGGGCCTAAATTAAGATATA   | NM_013450:           | NM_013450:                               |
| 29994 | BAZ2B          | bromodomain adjacent to zinc finger domain, 2B                          | -0.62 | CTGAAGGTAATGATAGCTATA  | NM_013450:           | NM_013450:                               |
| 27113 | BBC3           | BCL2 binding component 3                                                | -0.18 | CAATCCCATGTCATAGGTTA   | AF332558:            | NM_014417:                               |
| 27113 | BBC3           | BCL2 binding component 3                                                | 0.01  | CAGCCTGTAAGATACTGTATA  | AF332558:            | NM_014417:                               |
| 583   | BBS2           | Bardet-Biedl syndrome 2                                                 | 2.58  | ATGAAGAGTCTGTTATATGAA  | NM_031885:           | NM_031885:                               |
| 583   | BBS2           | Bardet-Biedl syndrome 2                                                 | 0.48  | CTCGTCAAGAACTTCTGTATA  | NM_031885:           | NM_031885:                               |
| 4059  | BCAM           | basal cell adhesion molecule (Lutheran blood group)                     | -4.95 | CAGCACCATTATATGCTGGAA  | NM_005581:           | NM_005581:NM_001013257:                  |
| 4059  | BCAM           | basal cell adhesion molecule (Lutheran blood group)                     | -0.64 | CAAGATCACTGGTATCGCAA   | NM_005581:           | NM_005581:NM_001013257:                  |
| 55973 | BCAP29         | B-cell receptor-associated protein 29                                   | -0.06 | ATGGCAGGTATTATAATATA   | NM_001008405:        | NM_018844:NM_001008405:                  |
| 55973 | BCAP29         | B-cell receptor-associated protein 29                                   | -1.13 | TAGGTCAAGTACTACTATATA  | NM_001008405:        | NM_018844:NM_001008405:                  |
| 10134 | BCAP31         | B-cell receptor-associated protein 31                                   | 1.03  | AAAGGTGAACCTCCAGAACAA  | NM_005745:           | NM_005745:                               |
| 10134 | BCAP31         | B-cell receptor-associated protein 31                                   | 0.01  | CAAGGATACATGGAGGAGAA   | NM_005745:           | NM_005745:                               |
| 9564  | BCAR1          | breast cancer anti-estrogen resistance 1                                | -1.12 | AAGCAGTTGAAAGCAGTGGAA  | NM_014567:           | NM_014567:                               |
| 9564  | BCAR1          | breast cancer anti-estrogen resistance 1                                | -4.69 | CTGGATGGAGGACTATGACTA  | NM_014567:           | NM_014567:                               |
| 8412  | BCAR3          | breast cancer anti-estrogen resistance 3                                | -0.22 | CAGTTATATGATATCTTTAA   | NM_003567:           | NM_003567:                               |
| 8412  | BCAR3          | breast cancer anti-estrogen resistance 3                                | 0.24  | AAGGTATCAGTTATATGATAT  | NM_003567:           | NM_003567:                               |
| 586   | BCAT1          | branched chain aminotransferase 1, cytosolic                            | 0.69  | ATGGTGACCTAATAAATTA    | NM_005504:           | NM_005504:                               |
| 586   | BCAT1          | branched chain aminotransferase 1, cytosolic                            | 1.14  | CTAGTGGTACATAGTAACATA  | NM_005504:           | NM_005504:                               |
| 587   | BCAT2          | branched chain aminotransferase 2, mitochondrial                        | -0.17 | CTGAAGTGAACATACGAAATA  | NM_001190:           | NM_001190:                               |
| 587   | BCAT2          | branched chain aminotransferase 2, mitochondrial                        | 1.32  | CACCTGAAGTGAATACGAAA   | NM_001190:           | NM_001190:                               |
| 56647 | BCOIP          | BRCA2 and CDKN1A interacting protein                                    | -0.06 | CAGTGTGTTGAACAAATTTCAA | NM_016567:           | NM_078468:NM_078469:NM_016567:           |
| 56647 | BCOIP          | BRCA2 and CDKN1A interacting protein                                    | -0.06 | GACGAGGAAAGTGAATTTGAA  | NM_016567:           | NM_078468:NM_078469:NM_016567:           |
| 56257 | BCDIN3         | bin3, bicoid-interacting 3, homolog (Drosophila)                        | -3.29 | CAGTATGGGAATTTATGCAA   | NM_019606:           | NM_019606:                               |
| 56257 | BCDIN3         | bin3, bicoid-interacting 3, homolog (Drosophila)                        | -7.16 | CACCAAGTGGGTGCATCTGAA  | NM_019606:           | NM_019606:                               |
| 590   | BOHE           | butyrylcholinesterase                                                   | -2.45 | CAGGAGTGAAGTGGTTGGAA   | NM_000055:           | NM_000055:                               |

|        |         |                                                                    |       |                        |            |                                                                  |
|--------|---------|--------------------------------------------------------------------|-------|------------------------|------------|------------------------------------------------------------------|
| 590    | BCHE    | butyrylcholinesterase                                              | 1.63  | CAGAACGTTGAACCTAGCTAA  | NM_000055: | NM_000055:                                                       |
| 593    | BCKDHA  | branched chain keto acid dehydrogenase E1, alpha polypeptide       | -0.39 | CTGGCGGGATTTATAGATAA   | NM_000709: | NM_000709:                                                       |
| 593    | BCKDHA  | branched chain keto acid dehydrogenase E1, alpha polypeptide       | -0.36 | CAAGAGCATGACACTGCCTAA  | NM_000709: | NM_000709:                                                       |
| 10295  | BCKDK   | (branched chain ketoacid dehydrogenase kinase                      | 0.85  | AACGCCACCAGTATGCTCTA   | NM_005881: | NM_005881:                                                       |
| 10295  | BCKDK   | (branched chain ketoacid dehydrogenase kinase                      | -0.33 | CAGAACCTGGAGAGCAGGGAA  | NM_005881: | NM_005881:                                                       |
| 8915   | BCL10   | B-cell CLL/lymphoma 10                                             | 0.05  | CACGCTACTGTTCCAGCAAA   | NM_003921: | NM_003921:                                                       |
| 8915   | BCL10   | B-cell CLL/lymphoma 10                                             | 0.87  | GTGCTGAAACTTAGAAATATA  | NM_003921: | NM_003921:                                                       |
| 64919  | BCL11B  | B-cell CLL/lymphoma 11B (zinc finger protein)                      | -1.35 | CAGAGGTGGGTTAAACTGTAA  | NM_022898: | NM_022898.NM_138576:                                             |
| 64919  | BCL11B  | B-cell CLL/lymphoma 11B (zinc finger protein)                      | -0.44 | CAGCGGATAACAATCTTTCAA  | NM_022898: | NM_022898.NM_138576:                                             |
| 596    | BCL2    | B-cell CLL/lymphoma 2                                              | -1.37 | CAGGCTTAAGATTTGGAATAA  | NM_000633: | NM_000633:                                                       |
| 596    | BCL2    | B-cell CLL/lymphoma 2                                              | -3.42 | CGGGAGATAGTGATGAAGTA   | NM_000633: | NM_000633.NM_000633:                                             |
| 597    | BCL2A1  | BCL2-related protein A1                                            | 1.16  | AGGACACTCCATATTGTGAAA  | NM_004049: | XM_375224.NM_004049:                                             |
| 597    | BCL2A1  | BCL2-related protein A1                                            | 0.24  | AGGGAGGAAGGATATTATAA   | NM_004049: | NM_004049:                                                       |
| 598    | BCL2L1  | BCL2-like 1                                                        | 0.15  | AAAGTGCAGTTCAGTAATAA   | NM_001191: | NM_138578.NM_001191:                                             |
| 598    | BCL2L1  | BCL2-like 1                                                        | 0.34  | AAGCGGATTTTGAATCTTTT   | NM_001191: | NM_138578.NM_001191:                                             |
| 10017  | BCL2L10 | BCL2-like 10 (apoptosis facilitator)                               | -2.44 | ACAGATGTGTGAGAAACAAGAA | NM_020396: | NM_020396:                                                       |
| 10017  | BCL2L10 | BCL2-like 10 (apoptosis facilitator)                               | 0.87  | ATGACAGATGTGTGAGAAACA  | NM_020396: | NM_020396:                                                       |
| 10018  | BCL2L11 | BCL2-like 11 (apoptosis facilitator)                               | 1.23  | CAGCATGTTCCAGTATTATTA  | NM_138627: | NM_138627:                                                       |
| 10018  | BCL2L11 | BCL2-like 11 (apoptosis facilitator)                               | 0.67  | CACCCACGAATGGTATCTTTA  | NM_138627: | NM_138627:                                                       |
| 83596  | BCL2L12 | BCL2-like 12 (proline rich)                                        | 0.07  | CGGGTAGCTCTCAAACCTCGA  | NM_052842: | NM_052842.NM_138639:                                             |
| 83596  | BCL2L12 | BCL2-like 12 (proline rich)                                        | -0.05 | CGCGGAAAGTGAACAATAA    | NM_052842: | NM_052842.NM_138639:                                             |
| 23786  | BCL2L13 | BCL2-like 13 (apoptosis facilitator)                               | -0.23 | CGGTGCTTTCCAGCCCTAAA   | NM_015367: | NM_015367:                                                       |
| 23786  | BCL2L13 | BCL2-like 13 (apoptosis facilitator)                               | -0.03 | TTGGGCTTATAGGCGCAGTTA  | NM_015367: | NM_015367:                                                       |
| 79370  | BCL2L14 | BCL2-like 14 (apoptosis facilitator)                               | 0.03  | ATGGCTGCTGATTTGAGCTAAA | NM_030766: | NM_030766:                                                       |
| 79370  | BCL2L14 | BCL2-like 14 (apoptosis facilitator)                               | 1.25  | TCGTTTCTAGTACTATTAT    | NM_030766: | NM_030766.NM_138722.NM_138723:                                   |
| 599    | BCL2L2  | BCL2-like 2                                                        | -4.08 | AAGGTGAGTATGTTCCCAA    | NM_004050: | NM_004050:                                                       |
| 599    | BCL2L2  | BCL2-like 2                                                        | -0.58 | TCGCCAGAACGTTGGACCAA   | NM_004050: | NM_004050:                                                       |
| 602    | BCL3    | B-cell CLL/lymphoma 3                                              | -0.11 | ACGGATCAGATGAAATTTAT   | NM_005178: | NM_005178:                                                       |
| 602    | BCL3    | B-cell CLL/lymphoma 3                                              | -0.57 | CACGATGTAATTTAAGCA     | NM_005178: | NM_005178:                                                       |
| 604    | BCL6    | B-cell CLL/lymphoma 6 (zinc finger protein 51)                     | 0.01  | AACCTGCATTTCCGTCACAAA  | NM_001706: | NM_001706.NM_138931:                                             |
| 604    | BCL6    | B-cell CLL/lymphoma 6 (zinc finger protein 51)                     | 0.31  | AACCTTAGTGTGATCAATCTA  | NM_001706: | NM_001706.NM_138931:                                             |
| 605    | BCL7A   | B-cell CLL/lymphoma 7A                                             | -4.40 | TGGAATGTTCCATATCGCCAA  | NM_020993: | NM_020993.NM_001024808:                                          |
| 605    | BCL7A   | B-cell CLL/lymphoma 7A                                             | -4.00 | CTGCACCTTCGAGGAAGTCAA  | NM_020993: | NM_020993.NM_001024808:                                          |
| 607    | BCL9    | B-cell CLL/lymphoma 9                                              | -0.17 | CACAGAGTAGCCCTAAGTCAA  | NM_004326: | NM_004326:                                                       |
| 607    | BCL9    | B-cell CLL/lymphoma 9                                              | 0.42  | CGCATTTATCCATCTGAGAA   | NM_004326: | NM_004326:                                                       |
| 613    | BCR     | breakpoint cluster region                                          | 2.73  | ACGGCAGTCCATGACGGTGAA  | NM_004327: | NM_004327.NM_021574:                                             |
| 613    | BCR     | breakpoint cluster region                                          | -2.39 | CAGCATTCGCGTACCACAA    | NM_004327: | NM_004327.NM_021574:                                             |
| 617    | BGS1L   | BGS1-like (yeast)                                                  | -0.06 | CACGGCGGATCTTATTGCTA   | NM_004328: | NM_004328:                                                       |
| 617    | BGS1L   | BGS1-like (yeast)                                                  | 1.15  | CGCATTTCCACTAAGTTTGA   | NM_004328: | NM_004328:                                                       |
| 622    | BDH1    | 3-hydroxybutyrate dehydrogenase, type 1                            | -6.02 | CAAGCAGGTGGCAGAAAGTGA  | NM_004051: | NM_004051.NM_203315.NM_203314:                                   |
| 622    | BDH1    | 3-hydroxybutyrate dehydrogenase, type 1                            | -1.03 | CAGCAGCGAAGAGGTGGAGAA  | NM_004051: | NM_004051.NM_203315.NM_203314:                                   |
| 56898  | BDH2    | 3-hydroxybutyrate dehydrogenase, type 2                            | 0.13  | AAGACATTAATGAGTCCAAAC  | NM_020139: | NM_020139:                                                       |
| 56898  | BDH2    | 3-hydroxybutyrate dehydrogenase, type 2                            | 1.24  | AATCTGGCAATATTATCAACA  | NM_020139: | NM_020139:                                                       |
| 623    | BDKRB1  | bradykinin receptor B1                                             | -0.50 | CGGGTCACTCGCTGCTCAT    | NM_000710: | NM_000710:                                                       |
| 623    | BDKRB1  | bradykinin receptor B1                                             | 0.23  | CTCCAATATCTCATCCATA    | NM_000710: | NM_000710:                                                       |
| 624    | BDKRB2  | bradykinin receptor B2                                             | -1.46 | CTGCACGGTGGCAGAGATCTA  | NM_000623: | NM_000623:                                                       |
| 624    | BDKRB2  | bradykinin receptor B2                                             | -1.07 | CTGGCAGGTAGAACCTAGAA   | NM_000623: | NM_000623:                                                       |
| 627    | BDNF    | brain-derived neurotrophic factor                                  | -0.33 | CGGGACGGTCCAGCTCTTGA   | NM_001709: | NM_170732.NM_170731.NM_170734.NM_170733:<br>NM_170735.NM_001709: |
| 627    | BDNF    | brain-derived neurotrophic factor                                  | 0.90  | CTGGCATTCAAGGATAGA     | NM_001709: | NM_170732.NM_170731.NM_170734.NM_170733:<br>NM_170735.NM_001709: |
| 8678   | BECN1   | beclin 1 (coiled-coil, myosin-like BCL2 interacting protein)       | 0.49  | ACCGACTGTTCCCTACGGAA   | NM_003766: | NM_003766:                                                       |
| 8678   | BECN1   | beclin 1 (coiled-coil, myosin-like BCL2 interacting protein)       | 0.26  | AGGGTCTAAGACGTCCAAACA  | NM_003766: | NM_003766:                                                       |
| 10282  | BET1    | BET1 homolog (S. cerevisiae)                                       | -0.35 | CACTGATGTCGTTGGCGCTTTA | NM_005868: | NM_005868:                                                       |
| 10282  | BET1    | BET1 homolog (S. cerevisiae)                                       | -0.02 | CAGAATAAATTTAGCTGAA    | NM_005868: | NM_005868:                                                       |
| 51283  | BFAR    | bifunctional apoptosis regulator                                   | 0.07  | CGGGACGAGTGGAAATGATTA  | NM_016561: | NM_016561:                                                       |
| 51283  | BFAR    | bifunctional apoptosis regulator                                   | 0.81  | TCCGGTGTGCTCACAGCTTTA  | NM_016561: | NM_016561:                                                       |
| 27319  | BHLHB5  | basic helix-loop-helix domain containing, class B, 5               | -0.59 | ACGTAAGAACATGCTAAGCAA  | NM_152414: | NM_152414:                                                       |
| 27319  | BHLHB5  | basic helix-loop-helix domain containing, class B, 5               | 0.05  | AGCAATAGTGTCTATACGTAA  | NM_152414: | NM_152414:                                                       |
| 637    | BID     | BH3 interacting domain death agonist                               | 1.49  | AAAGACAATGTTAAACTTTA   | NM_001196: | NM_001196.NM_197966.NM_197967:                                   |
| 637    | BID     | BH3 interacting domain death agonist                               | 0.00  | CAGGGATGAGTGCATCACAAA  | NM_001196: | NM_001196.NM_197966.NM_197967:                                   |
| 638    | BIK     | BCL2-interacting killer (apoptosis-inducing)                       | -1.33 | CGAGGAGCAGGAGTGTCTCAA  | NM_001197: | NM_001197:                                                       |
| 638    | BIK     | BCL2-interacting killer (apoptosis-inducing)                       | 2.98  | TGGCAAGAATCTACTGGAA    | NM_001197: | NM_001197:                                                       |
| 4671   | BIRC1   | baculoviral IAP repeat-containing 1                                | -0.01 | CGTGGTGAACCTTTGTGAATTA | NM_004536: | NM_004536:                                                       |
| 4671   | BIRC1   | baculoviral IAP repeat-containing 1                                | 2.34  | TGAAATTCATGATACTACTA   | NM_004536: | NM_004536:                                                       |
| 329    | BIRC2   | baculoviral IAP repeat-containing 2                                | -0.16 | TAGGCGTTCGATAACACTA    | NM_001166: | NM_001166:                                                       |
| 329    | BIRC2   | baculoviral IAP repeat-containing 2                                | 0.61  | TCGCCAGTCCCTCGTATCAAA  | NM_001166: | NM_001166:                                                       |
| 330    | BIRC3   | baculoviral IAP repeat-containing 3                                | -0.03 | CAAGAACATGATGTTATTA    | AF070674:  | NM_182962.NM_001165:                                             |
| 330    | BIRC3   | baculoviral IAP repeat-containing 3                                | -4.14 | CACAGACGCTTTCAAGCAA    | AF070674:  | NM_182962.NM_001165:                                             |
| 330    | BIRC3   | baculoviral IAP repeat-containing 3                                | 1.42  | CAGAGTCTATTTCCATGTTCTA | XR_000213: | NM_001165:                                                       |
| 331    | BIRC4   | baculoviral IAP repeat-containing 4                                | -0.57 | AGCGTATTTAATGATAGAATA  | NM_001167: | NM_001167:                                                       |
| 331    | BIRC4   | baculoviral IAP repeat-containing 4                                | -0.10 | CACGTAATTTGCGCAATTTAT  | NM_001167: | NM_001167:                                                       |
| 332    | BIRC5   | baculoviral IAP repeat-containing 5 (survivin)                     | -3.63 | CTGGCTGTCTCCTGAGAAATA  | NM_001168: | NM_001012271.NM_001168.NM_001012270:                             |
| 332    | BIRC5   | baculoviral IAP repeat-containing 5 (survivin)                     | -0.05 | CTGGCTGTAAGATGATGATTT  | NM_001168: | NM_001012271.NM_001168.NM_001012270:                             |
| 57448  | BIRC6   | baculoviral IAP repeat-containing 6 (apollon)                      | -0.27 | ACGGATGGAACGTACAGAAATA | NM_016252: | NM_016252:                                                       |
| 57448  | BIRC6   | baculoviral IAP repeat-containing 6 (apollon)                      | 1.11  | CCCGATATATGGATAATCGA   | NM_016252: | NM_016252:                                                       |
| 79444  | BIRC7   | baculoviral IAP repeat-containing 7 (livin)                        | 1.54  | ATGCTTCTGAATGAAATAAAA  | NM_022161: | NM_139317.NM_022161:                                             |
| 79444  | BIRC7   | baculoviral IAP repeat-containing 7 (livin)                        | 1.21  | TTGGATGCTTCTGAATAGAAA  | NM_022161: | NM_139317.NM_022161:                                             |
| 112401 | BIRC8   | baculoviral IAP repeat-containing 8                                | -0.51 | CGGTTATTGATTTCAAGCAA   | NM_033341: | NM_033341:                                                       |
| 112401 | BIRC8   | baculoviral IAP repeat-containing 8                                | 0.41  | AACGTTAATATTCGAGGTGAA  | NM_033341: | NM_033341:                                                       |
| 640    | BLK     | B lymphoid tyrosine kinase                                         | 2.84  | CAGCCGCTGCTGTTAAACCAA  | NM_001715: | NM_001715:                                                       |
| 640    | BLK     | B lymphoid tyrosine kinase                                         | 0.14  | CTGGTAAGCGACTGTACATA   | NM_001715: | NM_001715:                                                       |
| 641    | BLM     | Bloom syndrome                                                     | 0.16  | CCGAATCTCAATGATACATA   | NM_000057: | NM_000057:                                                       |
| 641    | BLM     | Bloom syndrome                                                     | 0.01  | CTGACCATCTGTGACTATAAA  | NM_000057: | NM_000057:                                                       |
| 642    | BLMH    | bleomycin hydrolase                                                | 0.71  | CTGAAACAGAAATCTGTTAAA  | NM_000386: | NM_000386:                                                       |
| 642    | BLMH    | bleomycin hydrolase                                                | -2.59 | AAGGATGAATGATATCTGAA   | NM_000386: | NM_000386:                                                       |
| 29760  | BLNK    | B-cell linker                                                      | 0.33  | TGGGATTTTGAAGCAACAA    | NM_013314: | NM_013314:                                                       |
| 29760  | BLNK    | B-cell linker                                                      | -0.02 | CAGAGCGAGTATGACACAA    | NM_013314: | NM_013314:                                                       |
| 643    | BLR1    | Burkitt lymphoma receptor 1, GTP binding protein (chemokine (C-X-C | 0.23  | CAGCCATGAACATCCCGTAA   | NM_001716: | NM_001716:                                                       |
| 643    | BLR1    | Burkitt lymphoma receptor 1, GTP binding protein (chemokine (C-X-C | -0.05 | CCCCGTAACGCTGAAATGGA   | NM_001716: | NM_001716:                                                       |
| 90427  | BMF     | Bcl2 modifying factor                                              | 0.13  | CAGACGCTAGAAACTAAAATTA | AK024472:  | NM_001003942.NM_033503.NM_001003940.NM_01003943:                 |
| 90427  | BMF     | Bcl2 modifying factor                                              | 3.02  | GACGCTAGAAACTAAAATTA   | AK024472:  | NM_001003942.NM_033503.NM_001003940.NM_01003943:                 |

|        |               |                                                                           |       |                        |            |                                                                                                                                                |
|--------|---------------|---------------------------------------------------------------------------|-------|------------------------|------------|------------------------------------------------------------------------------------------------------------------------------------------------|
| 649    | BMP1          | bone morphogenetic protein 1                                              | -1.12 | AAGGACTATGCCACATTCAA   | NM_001199: | NM_006131:NM_006130:NM_006132:NM_006129:<br>NM_001199:NM_006128:<br>NM_006131:NM_006130:NM_006132:NM_006129:<br>NM_001199:NM_006128:           |
| 649    | BMP1          | bone morphogenetic protein 1                                              | -0.33 | CAGCTATATGTGTTCCACCTA  | NM_001199: | NM_006131:NM_006130:NM_006132:NM_006129:<br>NM_001199:NM_006128:                                                                               |
| 27302  | BMP10         | bone morphogenetic protein 10                                             | -5.03 | CCCGCTCATACGACTTCAA    | NM_014482: | NM_014482:                                                                                                                                     |
| 27302  | BMP10         | bone morphogenetic protein 10                                             | 0.26  | TACGATGGAGTAGACCGGAAA  | NM_014482: | NM_014482:                                                                                                                                     |
| 9210   | BMP15         | bone morphogenetic protein 15                                             | -0.18 | TCOCGTATAAGTATGTTCCAA  | NM_005448: | NM_005448:                                                                                                                                     |
| 9210   | BMP15         | bone morphogenetic protein 15                                             | -0.64 | ACGCCATTATTGAGAACCTTA  | NM_005448: | NM_005448:                                                                                                                                     |
| 650    | BMP2          | bone morphogenetic protein 2                                              | -0.95 | AACGCCCTTAAGTCCAGCTGTA | NM_001200: | NM_001200:                                                                                                                                     |
| 650    | BMP2          | bone morphogenetic protein 2                                              | 1.53  | CACCGAATTAATATTTATGAA  | NM_001200: | NM_001200:                                                                                                                                     |
| 55589  | BMP2K         | BMP2 inducible kinase                                                     | 0.93  | AGGCATCACCTGAATATCTTA  | NM_017593: | NM_198892:NM_017593:                                                                                                                           |
| 55589  | BMP2K         | BMP2 inducible kinase                                                     | -0.40 | TCGGATGTGCATTGAAGCGAA  | NM_017593: | NM_198892:NM_017593:                                                                                                                           |
| 651    | BMP3 (bone i  | bone morphogenetic protein 3 (osteogenic)                                 | -0.59 | CAGGAGATACCTCAAGGTAGA  | NM_001201: | NM_001201:                                                                                                                                     |
| 651    | BMP3 (bone i  | bone morphogenetic protein 3 (osteogenic)                                 | -3.96 | CGCCATTTCTGAGCCAGAAA   | NM_001201: | NM_001201:                                                                                                                                     |
| 652    | BMP4          | bone morphogenetic protein 4                                              | -0.45 | CACGAGACTGTCACCCACAAA  | NM_001202: | NM_130851:NM_130850:NM_001202:                                                                                                                 |
| 652    | BMP4          | bone morphogenetic protein 4                                              | -3.38 | CCCGATGGGATTCGCCCCAAA  | NM_001202: | NM_001202:                                                                                                                                     |
| 653    | BMP5          | bone morphogenetic protein 5                                              | 1.62  | AAAGATCTGTATTAAAGTTTA  | NM_021073: | NM_021073:                                                                                                                                     |
| 653    | BMP5          | bone morphogenetic protein 5                                              | 1.27  | CGGAGCAACAACCGATTTGAA  | NM_021073: | NM_021073:                                                                                                                                     |
| 654    | BMP6          | bone morphogenetic protein 6                                              | -0.95 | ACCGTGCTGTGCGCCAACTAA  | NM_001718: | NM_001718:                                                                                                                                     |
| 654    | BMP6          | bone morphogenetic protein 6                                              | -1.06 | CAGCATTATCAAGTCTTACA   | NM_001718: | NM_001718:                                                                                                                                     |
| 655    | BMP7          | bone morphogenetic protein 7 (osteogenic protein 1)                       | -0.08 | CCCGAAGTTCCTGTAATAAA   | NM_001719: | NM_001719:                                                                                                                                     |
| 655    | BMP7          | bone morphogenetic protein 7 (osteogenic protein 1)                       | -0.04 | TCCAATGAACAAGACTCTACA  | NM_001719: | NM_001719:                                                                                                                                     |
| 656    | BMP8B         | bone morphogenetic protein 8b (osteogenic protein 2)                      | -0.05 | ACAGATATGATGAAAGTGAA   | NM_001720: | NM_001720:                                                                                                                                     |
| 656    | BMP8B         | bone morphogenetic protein 8b (osteogenic protein 2)                      | 0.13  | TAGGAAGACATGTAAGAGCA   | NM_001720: | NM_001720:                                                                                                                                     |
| 657    | BMPR1A        | bone morphogenetic protein receptor, type IA                              | 0.86  | CAGCTACGCCGACAAATAGAA  | NM_004329: | NM_004329:                                                                                                                                     |
| 657    | BMPR1A        | bone morphogenetic protein receptor, type IA                              | 0.01  | GCGGAGACATTAAGGTGATA   | NM_004329: | NM_004329:                                                                                                                                     |
| 657    | BMPR1A        | bone morphogenetic protein receptor, type IA                              | 0.35  | AAGAATGTTATAAAGTAGAA   | XM_208545: | XM_208545:NM_004329:                                                                                                                           |
| 658    | BMPR1B        | bone morphogenetic protein receptor, type IB                              | -5.31 | AACGAATGTAATAAGACCTA   | NM_001203: | NM_001203:                                                                                                                                     |
| 658    | BMPR1B        | bone morphogenetic protein receptor, type IB                              | 0.54  | ACGGATATTTTTCACGATGA   | NM_001203: | NM_001203:                                                                                                                                     |
| 659    | BMPR2         | bone morphogenetic protein receptor, type II (serine/threonine kinase)    | 0.57  | CTCGTAAGTATGTAAGGAAA   | NM_001204: | NM_001204:                                                                                                                                     |
| 660    | BMX           | BMX non-receptor tyrosine kinase                                          | 2.34  | AAGCTTATTCATTATCATCAA  | NM_001721: | NM_203281:NM_001721:                                                                                                                           |
| 660    | BMX           | BMX non-receptor tyrosine kinase                                          | 0.16  | CACAGTGTCTTATTATGATA   | NM_001721: | NM_203281:NM_001721:                                                                                                                           |
| 662    | BNIP1         | BCL2/adenovirus E1B 19kDa interacting protein 1                           | 0.04  | ACGAACGATCCTGGATGCAAAA | NM_013979: | NM_001205:NM_013980:NM_013978:NM_013979:                                                                                                       |
| 662    | BNIP1         | BCL2/adenovirus E1B 19kDa interacting protein 1                           | -0.01 | CACGTCGGGATCTGTAACCAA  | NM_013979: | NM_001205:NM_013980:NM_013978:NM_013979:                                                                                                       |
| 664    | BNIP3         | BCL2/adenovirus E1B 19kDa interacting protein 3                           | 0.78  | ATGAATAACATTCAGATAATAA | NM_004052: | NM_004052:                                                                                                                                     |
| 664    | BNIP3         | BCL2/adenovirus E1B 19kDa interacting protein 3                           | 0.73  | ATGCTAATTTGCTCAATCAA   | NM_004052: | NM_004052:                                                                                                                                     |
| 665    | BNIP3L        | BCL2/adenovirus E1B 19kDa interacting protein 3-like                      | -0.39 | AAGCTTACACCTGTTTACAA   | AL132665:  | NM_004331:                                                                                                                                     |
| 665    | BNIP3L        | BCL2/adenovirus E1B 19kDa interacting protein 3-like                      | 0.54  | GACATCGATTTGACTATTTA   | AL132665:  | NM_004331:                                                                                                                                     |
| 91653  | BOC (Boc ho   | Boc homolog (mouse)                                                       | 0.09  | CAGGTCCTTATATCACCTCAA  | NM_033254: | NM_033254:                                                                                                                                     |
| 91653  | BOC (Boc ho   | Boc homolog (mouse)                                                       | -1.69 | ACCCGAGATCATGGCCAGCAA  | NM_033254: | NM_033254:                                                                                                                                     |
| 666    | BOK           | BCL2-related ovarian killer                                               | -0.84 | CAGCCTGTAACAGAGCGTAA   | NM_032515: | NM_032515:                                                                                                                                     |
| 666    | BOK           | BCL2-related ovarian killer                                               | -1.62 | GCCCTGCACATTCATCTGAA   | NM_032515: | NM_032515:                                                                                                                                     |
| 669    | BPGM (2,3-bi  | 2,3-bisphosphoglycerate mutase                                            | 0.86  | CAGAATAAGCAGCAATAATAA  | NM_001724: | NM_001724:NM_199186:                                                                                                                           |
| 669    | BPGM (2,3-bi  | 2,3-bisphosphoglycerate mutase                                            | -0.97 | CTGGAAGGTATCTCAGATGAA  | NM_001724: | NM_001724:NM_199186:                                                                                                                           |
| 670    | BPHL          | biphenyl hydrolase-like (serine hydrolase; breast epithelial mucin-asso   | -0.16 | CCAAATGAGAATAATGACATA  | NM_004332: | NM_004332:                                                                                                                                     |
| 670    | BPHL          | biphenyl hydrolase-like (serine hydrolase; breast epithelial mucin-asso   | 0.81  | GCAGATGAATTCACAAAGTTA  | NM_004332: | NM_004332:                                                                                                                                     |
| 671    | BPI (bacteric | bactericidal/permeability-increasing protein                              | 0.80  | AGGAATCGTGTTCATTTGTA   | NM_001725: | NM_001725:                                                                                                                                     |
| 671    | BPI (bacteric | bactericidal/permeability-increasing protein                              | 0.01  | CAGACGTGTCTATAAATGAA   | NM_001725: | NM_001725:                                                                                                                                     |
| 80341  | BPIL1         | bactericidal/permeability-increasing protein-like 1                       | 0.65  | ACCATACTAGTCAATCAGCAA  | NM_025227: | NM_025227:                                                                                                                                     |
| 80341  | BPIL1         | bactericidal/permeability-increasing protein-like 1                       | 0.01  | CAGCGAATTTCTCATTTTCAA  | NM_025227: | NM_025227:                                                                                                                                     |
| 254240 | BPIL2 (bacter | bactericidal/permeability-increasing protein-like 2                       | 0.21  | CCCGGATTCGAGAGATCTACA  | NM_174932: | NM_174932:                                                                                                                                     |
| 254240 | BPIL2 (bacter | bactericidal/permeability-increasing protein-like 2                       | -0.17 | CTCCCGGATTCGAGAGATCTA  | NM_174932: | NM_174932:                                                                                                                                     |
| 128859 | BPIL3         | bactericidal/permeability-increasing protein-like 3                       | -2.86 | CTGGCTGAGCTGGACATAGTA  | NM_174897: | NM_174897:                                                                                                                                     |
| 128859 | BPIL3         | bactericidal/permeability-increasing protein-like 3                       | -0.87 | CCTGGTCAATGTGAAGACTAA  | NM_174897: | NM_174897:                                                                                                                                     |
| 673    | BRAF          | v-raf murine sarcoma viral oncogene homolog B1                            | -0.04 | AAGCTAGATGCACCTCAACAAA | NM_004333: | NM_004333:                                                                                                                                     |
| 673    | BRAF          | v-raf murine sarcoma viral oncogene homolog B1                            | 1.20  | ACAGCAGATGTGAATATCTCTA | NM_004333: | NM_004333:                                                                                                                                     |
| 8315   | BRAP          | BRCA1 associated protein                                                  | 2.05  | CAAGATAGTTCGGATAGAGAA  | NM_006768: | NM_006768:                                                                                                                                     |
| 8315   | BRAP          | BRCA1 associated protein                                                  | -0.72 | TAGGATGTGGACGGTATGTCA  | NM_006768: | NM_006768:                                                                                                                                     |
| 672    | BRCA1         | breast cancer 1, early onset                                              | -0.10 | ACCATACAGCTTCATAAATAA  | NM_007294: | NM_007296:NM_007294:NM_007295:NM_007299:<br>NM_007297:NM_007299:NM_007300:NM_007301:<br>NM_007302:NM_007303:NM_007304:NM_007306:<br>NM_007305: |
| 672    | BRCA1         | breast cancer 1, early onset                                              | 0.38  | ACCGTTAATAAGCAACTTAT   | NM_007294: | NM_007296:NM_007294:NM_007295:NM_007299:<br>NM_007300:NM_007301:NM_007303:NM_007304:                                                           |
| 675    | BRCA2         | breast cancer 2, early onset                                              | 0.07  | CAGGACACAATTCACACTAAA  | NM_000059: | NM_000059:                                                                                                                                     |
| 675    | BRCA2         | breast cancer 2, early onset                                              | 0.08  | TTGGAGGAATATCGTAGGTAA  | NM_000059: | NM_000059:                                                                                                                                     |
| 79184  | BRCC3         | BRCA1/BRCA2-containing complex, subunit 3                                 | 0.07  | ATGGACCTACATACACACAAA  | NM_024332: | NM_024332:NM_001018055:                                                                                                                        |
| 79184  | BRCC3         | BRCA1/BRCA2-containing complex, subunit 3                                 | 0.81  | TACGATGTTGATTATAACATT  | NM_024332: | NM_024332:NM_001018055:                                                                                                                        |
| 23774  | BRD1          | bromodomain containing 1                                                  | -0.13 | AAGACGGGATGTAATTTACA   | NM_014577: | NM_014577:                                                                                                                                     |
| 23774  | BRD1          | bromodomain containing 1                                                  | 0.51  | ACGGTTAGAAGCTCAAGGGTAA | NM_014577: | NM_014577:                                                                                                                                     |
| 10902  | BRD8          | bromodomain containing 8                                                  | 0.01  | CAGATCGTAGCTAGTTTGTAT  | NM_006696: | NM_183359:NM_006696:                                                                                                                           |
| 10902  | BRD8          | bromodomain containing 8                                                  | -2.52 | CGGCTGTCTCCACTACTGAA   | NM_006696: | NM_139199:NM_183359:NM_006696:                                                                                                                 |
| 26228  | BRDG1         | BCR downstream signaling 1                                                | -0.01 | CACCAGAATTAGAAATTAACA  | NM_012108: | NM_012108:                                                                                                                                     |
| 26228  | BRDG1         | BCR downstream signaling 1                                                | -0.10 | AAGAACCAACTGAAGATTAT   | NM_012108: | NM_012108:                                                                                                                                     |
| 9577   | BRE           | brain and reproductive organ-expressed (TNFRSF1A modulator)               | 1.15  | AAGAAATAAECTCACAAATTA  | NM_004899: | NM_199191:NM_199192:NM_004899:NM_199193:<br>NM_199194:                                                                                         |
| 9577   | BRE           | brain and reproductive organ-expressed (TNFRSF1A modulator)               | -1.69 | CTCGCTGTTCTTCTCTGAAA   | NM_004899: | NM_199191:NM_199192:NM_004899:NM_199193:<br>NM_199194:                                                                                         |
| 55290  | BRF2          | BRF2, subunit of RNA polymerase III transcription initiation factor, BRF1 | 1.35  | GAGGTGGGAAATAATTCCTTA  | NM_018310: | NM_018310:                                                                                                                                     |
| 55290  | BRF2          | BRF2, subunit of RNA polymerase III transcription initiation factor, BRF1 | -1.03 | ACCCGGGTTGCTACTACCATA  | NM_018310: | NM_018310:                                                                                                                                     |
| 83990  | BRIP1         | BRCA1 interacting protein C-terminal helicase 1                           | -0.75 | CCTGAACCTTACGATCCGTA   | NM_032043: | NM_032043:                                                                                                                                     |
| 83990  | BRIP1         | BRCA1 interacting protein C-terminal helicase 1                           | 0.60  | AAGATAACAGTCCACTTCAA   | NM_032043: | NM_032043:                                                                                                                                     |
| 25855  | BRMS1         | breast cancer metastasis suppressor 1                                     | 2.92  | AAGGAGAGTGTTCAGGGAAA   | NM_015399: | NM_015399:NM_001024957:NM_001024958:                                                                                                           |
| 25855  | BRMS1         | breast cancer metastasis suppressor 1                                     | 2.77  | CAGGAATAGTACGAATGTGA   | NM_015399: | NM_015399:NM_001024957:NM_001024958:                                                                                                           |
| 84312  | BRMS1L        | breast cancer metastasis-suppressor 1-like                                | 0.01  | ATGCAAAATTCGTAACAAGGTA | NM_032352: | NM_032352:                                                                                                                                     |
| 84312  | BRMS1L        | breast cancer metastasis-suppressor 1-like                                | -2.09 | CGCTGGCAACTTTACAGGAAA  | NM_032352: | NM_032352:                                                                                                                                     |
| 7862   | BRPF1         | bromodomain and PHD finger containing, 1                                  | -3.56 | CAGCACTGCCTCAAGTATAA   | NM_004634: | NM_001003694:NM_004634:                                                                                                                        |
| 7862   | BRPF1         | bromodomain and PHD finger containing, 1                                  | 0.01  | AAGGAGACGATCAAGGTTCA   | NM_004634: | NM_001003694:NM_004634:                                                                                                                        |
| 27154  | BRPF3 (brom   | bromodomain and PHD finger containing, 3                                  | -2.29 | CGGCTTGAGAAAGAGTCATA   | XM_166450: | NM_015695:                                                                                                                                     |
| 27154  | BRPF3 (brom   | bromodomain and PHD finger containing, 3                                  | -1.53 | TACCAACTGCATGAAGTATAA  | XM_166450: | NM_015695:                                                                                                                                     |
| 680    | BRSS3 (bombe  | bombesin-like receptor 3                                                  | 0.35  | AGCGTGTGATTCGGACTTAA   | NM_001727: | NM_001727:                                                                                                                                     |
| 680    | BRSS3 (bombe  | bombesin-like receptor 3                                                  | 0.05  | CAGCGTGTGATTCGGACTTAA  | NM_001727: | NM_001727:                                                                                                                                     |
| 84446  | BRSK1         | BR serine/threonine kinase 1                                              | 2.52  | CAACTGTGAATCTGTAATAAA  | NM_032430: | NM_032430:                                                                                                                                     |
| 84446  | BRSK1         | BR serine/threonine kinase 1                                              | 2.15  | ACAAAATTTCTCGTGCTAAA   | NM_032430: | NM_032430:                                                                                                                                     |
| 9024   | BRSK2         | BR serine/threonine kinase 2                                              | -2.84 | CCCGACTGCCAGAGCTGCTGA  | NM_003957: | NM_003957:                                                                                                                                     |
| 9024   | BRSK2         | BR serine/threonine kinase 2                                              | -0.01 | GCGAGCTACTGTAACATTTAA  | NM_003957: | NM_003957:                                                                                                                                     |

|        |           |                                                                   |       |                        |               |                                          |
|--------|-----------|-------------------------------------------------------------------|-------|------------------------|---------------|------------------------------------------|
| 26580  | BSCL2     | Bernardinelli-Seip congenital lipodystrophy 2 (seipin)            | -2.81 | CAGGAGGAGTCAACTCCGCAA  | NM_032667:    | NM_032667:                               |
| 26580  | BSCL2     | Bernardinelli-Seip congenital lipodystrophy 2 (seipin)            | 0.37  | CCGCTTCTCTTTCAGGTTAA   | NM_032667:    | NM_032667:                               |
| 682    | BSG       | basigin (Ok blood group)                                          | 0.05  | CCCGTAGATTCCCATCATACA  | NM_001728:    | NM_198591:NM_001728:NM_198590:NM_198589: |
| 682    | BSG       | basigin (Ok blood group)                                          | -2.56 | CCGGTCAGAGCTACACATTGA  | NM_001728:    | NM_198591:NM_001728:NM_198590:NM_198589: |
| 7809   | BSND      | Barter syndrome, infantile, with sensorineural deafness (Barttin) | 0.27  | TGGGATGATATGGAGGTTCAA  | NM_057176:    | NM_057176:                               |
| 7809   | BSND      | Barter syndrome, infantile, with sensorineural deafness (Barttin) | -3.27 | CTGGACATGGACTCCAGTGAA  | NM_057176:    | NM_057176:                               |
| 54836  | BSPRY     | B-box and SPRY domain containing                                  | 0.05  | CCAGAACAGTTGTGCCTATAA  | NM_017688:    | NM_017688:                               |
| 54836  | BSPRY     | B-box and SPRY domain containing                                  | -3.03 | CTGGATGGTGAATGCCAGAA   | NM_017688:    | NM_017688:                               |
| 684    | BST2      | bone marrow stromal cell antigen 2                                | -3.00 | AAGCGTGAGAATCGGGACAAA  | NM_004335:    | NM_004335:                               |
| 684    | BST2      | bone marrow stromal cell antigen 2                                | -2.42 | AGGGAGAGATCACTACATTAA  | NM_004335:    | NM_004335:                               |
| 90135  | BTBD6     | BTB (POZ) domain containing 6                                     | 0.51  | ATAGTGGACTTCTGTAATAAA  | NM_033271:    | NM_033271:                               |
| 90135  | BTBD6     | BTB (POZ) domain containing 6                                     | -0.25 | TGGGAGGCCCTCAACACCAA   | NM_033271:    | NM_033271:                               |
| 685    | BTC       | (betacell) betacellulin                                           | -0.03 | CAGGATTACTAGTCAACAAA   | NM_001729:    | NM_001729:                               |
| 685    | BTC       | (betacell) betacellulin                                           | 0.04  | CACCAGAAGTCCGAAACTAA   | NM_001729:    | NM_001729:                               |
| 686    | BDT       | (biotinid: biotinidase                                            | 0.76  | ATGCGATTGGTCTCAAGCTAA  | NM_000060:    | NM_000060:                               |
| 686    | BDT       | (biotinid: biotinidase                                            | -0.61 | CACAATGTCTGTTCCAGCAA   | NM_000060:    | NM_000060:                               |
| 695    | BTK       | Bruton agammaglobulinemia tyrosine kinase                         | 3.22  | CAGCTCGAACTGTTGGTAA    | NM_000061:    | NM_000061:                               |
| 695    | BTK       | Bruton agammaglobulinemia tyrosine kinase                         | 0.82  | CCCTTTATGATTACATGCCAA  | NM_000061:    | NM_000061:                               |
| 696    | BTN1A1    | butyrophilin, subfamily 1, member A1                              | -1.64 | CTCATCGCTTTACCTAATAA   | NM_001732:    | NM_001732:                               |
| 696    | BTN1A1    | butyrophilin, subfamily 1, member A1                              | -0.55 | CACCCCTCAATTTGTTGATCCA | NM_001732:    | NM_001732:                               |
| 11120  | BTN2A1    | butyrophilin, subfamily 2, member A1                              | -0.08 | AAGTATGGATCCAAAGCAAA   | NM_007049:    | NM_007049:NM_078476:                     |
| 11120  | BTN2A1    | butyrophilin, subfamily 2, member A1                              | 2.50  | TACATACATTTACAACATTTA  | NM_007049:    | NM_007049:NM_078476:                     |
| 10385  | BTN2A2    | butyrophilin, subfamily 2, member A2                              | 1.76  | AACGATTAATGTTTCAATTT   | NM_006995:    | NM_181531:NM_006995:                     |
| 10385  | BTN2A2    | butyrophilin, subfamily 2, member A2                              | -0.21 | TACGTCAGCATTCAGGTTCAA  | NM_006995:    | NM_006995:                               |
| 54718  | BTN2A3    | (buty)butyrophilin, subfamily 2, member A3                        | -1.06 | TAGGTTCTTATGACAGCCAAA  | NM_024018:    | NM_024018:                               |
| 54718  | BTN2A3    | (buty)butyrophilin, subfamily 2, member A3                        | -3.17 | CAGGGAGAGCATTCGGGGCAA  | NM_024018:    | NM_024018:                               |
| 11119  | BTN3A1    | butyrophilin, subfamily 3, member A1                              | 1.01  | AAGACTCAGTTCAGAAAGAAA  | NM_194441:    | NM_194441:NM_007048:                     |
| 11119  | BTN3A1    | butyrophilin, subfamily 3, member A1                              | 0.05  | CAGATGGAGAAGTATCCAGTA  | NM_194441:    | NM_194441:NM_007048:                     |
| 11118  | BTN3A2    | butyrophilin, subfamily 3, member A2                              | -0.56 | CAGAGCGGGAAATAAGCCTAA  | NM_007047:    | NM_007047:                               |
| 11118  | BTN3A2    | butyrophilin, subfamily 3, member A2                              | -0.05 | CAGCCTGATGCTCTAATGGAA  | NM_007047:    | NM_007047:                               |
| 10384  | BTN3A3    | butyrophilin, subfamily 3, member A3                              | 0.20  | CCAGCTGATATCAGAGACTTA  | NM_006994:    | NM_006994:NM_197974:                     |
| 10384  | BTN3A3    | butyrophilin, subfamily 3, member A3                              | 1.29  | AAGTGAATTAACITTTACAAA  | NM_006994:    | NM_006994:NM_197974:                     |
| 56244  | BTNL2     | butyrophilin-like 2 (MHC class II associated)                     | 0.34  | GTGGGAGAAGATATACAGCTA  | NM_019602:    | NM_019602:                               |
| 56244  | BTNL2     | butyrophilin-like 2 (MHC class II associated)                     | -1.07 | ATGGAGGGACATGGAAGGAAA  | NM_019602:    | NM_019602:                               |
| 10917  | BTNL3     | butyrophilin-like 3                                               | 0.29  | ACCCATGGAAATGATTTTGAA  | NM_006707:    | NM_197975:NM_006707:                     |
| 10917  | BTNL3     | butyrophilin-like 3                                               | -0.31 | CCCAGCATTAACGTATACCAA  | NM_006707:    | NM_197975:NM_006707:                     |
| 79908  | BTNL8     | butyrophilin-like 8                                               | -1.59 | CAGGATTAAGTCCAGCTTTA   | NM_024850:    | NM_024850:                               |
| 79908  | BTNL8     | butyrophilin-like 8                                               | -1.31 | CACAGTATCAAGCAGGACAAA  | NM_024850:    | NM_024850:                               |
| 153579 | BTNL9     | butyrophilin-like 9                                               | 0.49  | AACATCTTGTCTTAGCAAAA   | NM_152547:    | NM_152547:                               |
| 153579 | BTNL9     | butyrophilin-like 9                                               | -1.39 | CCAGATCAATCAAGTGATTTA  | NM_152547:    | NM_152547:                               |
| 8945   | BTRC      | beta-transducin repeat containing                                 | 0.01  | CAGGATGAGCAACAACAGTAA  | NM_003939:    | NM_003939:NM_033637:                     |
| 8945   | BTRC      | beta-transducin repeat containing                                 | 0.37  | CTGGGCTAGAATAAATGTAAA  | NM_003939:    | NM_003939:NM_033637:                     |
| 699    | BUB1      | BUB1 budding uninhibited by benzimidazoles 1 homolog (yeast)      | 2.22  | AACACTACTAACAAGATTA    | NM_004336:    | NM_004336:                               |
| 699    | BUB1      | BUB1 budding uninhibited by benzimidazoles 1 homolog (yeast)      | -1.97 | CAGCTTGATAAAGAGTCAA    | NM_004336:    | NM_004336:                               |
| 701    | BUB1B     | BUB1 budding uninhibited by benzimidazoles 1 homolog beta (yeast) | 2.57  | ACGAGAATACCTAATATGTGA  | NM_001211:    | NM_001211:                               |
| 701    | BUB1B     | BUB1 budding uninhibited by benzimidazoles 1 homolog beta (yeast) | -0.64 | CAGATTTAGCACATTTACTAT  | NM_001211:    | NM_001211:                               |
| 9184   | BUB3      | BUB3 budding uninhibited by benzimidazoles 3 homolog (yeast)      | 0.71  | CTGGTTATAGTTGCTAATTTCT | NM_004725:    | NM_004725:                               |
| 9184   | BUB3      | BUB3 budding uninhibited by benzimidazoles 3 homolog (yeast)      | -0.36 | TTGGACCTGTTTCTATCTCTA  | NM_004725:    | NM_004725:                               |
| 9256   | BZRAP1    | benzodiazepine receptor (peripheral) associated protein 1         | 0.94  | CACAGTGAGTATGAACTTGA   | NM_004758:    | NM_004758:                               |
| 9256   | BZRAP1    | benzodiazepine receptor (peripheral) associated protein 1         | -5.18 | CAGAGCTAAATGGCTCCTTAA  | NM_004758:    | NM_004758:                               |
| 706    | BZRP      | benzodiazepine receptor (peripheral)                              | -1.17 | CGGCTCCTACCTGGCTGGAA   | NM_000714:    | NM_000714:NM_007311:                     |
| 706    | BZRP      | benzodiazepine receptor (peripheral)                              | -0.05 | CCCATCTTCTTTGGTGCCCGA  | NM_000714:    | NM_000714:NM_007311:                     |
| 222642 | BZRPL1    | benzodiazepine receptor (peripheral)-like 1                       | 0.08  | CAGAGGAGTGTCTGGAGAAA   | NM_001010873: | NM_001010873:                            |
| 222642 | BZRPL1    | benzodiazepine receptor (peripheral)-like 1                       | -2.76 | CCCATTCTACAAGTCTTATT   | NM_001010873: | NM_001010873:                            |
| 340895 | C10orf112 | chromosome 10 open reading frame 112                              | -0.60 | CAGGAGTATGGGAATTTAAA   | XM_295865:    | XM_295865:                               |
| 340895 | C10orf112 | chromosome 10 open reading frame 112                              | 0.67  | AAGCTGAACCTCGTAGATAA   | XM_295865:    | XM_295865:                               |
| 80195  | C10orf57  | chromosome 10 open reading frame 57                               | -8.21 | AACCATAGAGTTAGGCATCAT  | NM_025125:    | NM_025125:                               |
| 80195  | C10orf57  | chromosome 10 open reading frame 57                               | 0.01  | ACCCGAAAGATTATGAACATA  | NM_025125:    | NM_025125:                               |
| 118812 | C10orf83  | chromosome 10 open reading frame 83                               | 0.05  | AAAGGTGTTTATAAAGAATAA  | NM_178832:    | NM_178832:                               |
| 118812 | C10orf83  | chromosome 10 open reading frame 83                               | -0.90 | CAGATTTGGTGGGAAGTTATA  | NM_178832:    | NM_178832:                               |
| 80013  | C10orf97  | chromosome 10 open reading frame 97                               | -0.44 | ACGTTATTATTATGATCCTA   | NM_024948:    | NM_024948:                               |
| 80013  | C10orf97  | chromosome 10 open reading frame 97                               | 0.66  | TTGAATGATCCGGCTTGTA    | NM_024948:    | NM_024948:                               |
| 747    | C11orf11  | chromosome 11 open reading frame 11                               | 0.65  | CCAACTAATATTGCTGTAAA   | NM_006133:    | NM_006133:                               |
| 747    | C11orf11  | chromosome 11 open reading frame 11                               | 1.17  | CTGCAGTGTGATACATGTTA   | NM_006133:    | NM_006133:                               |
| 53838  | C11orf24  | chromosome 11 open reading frame 24                               | 0.45  | CGGAGCCTGACCTGAATTTAA  | NM_022338:    | NM_022338:                               |
| 53838  | C11orf24  | chromosome 11 open reading frame 24                               | 0.98  | TGGAGCCTGACCTGAATTTAA  | NM_022338:    | NM_022338:                               |
| 51275  | C12orf47  | chromosome 12 open reading frame 47                               | 0.08  | CTCCACCAGTAACTATCAAAA  | NM_016534:    | NM_016534:                               |
| 51275  | C12orf47  | chromosome 12 open reading frame 47                               | -0.77 | GAGCATAAGTTAAGTAAGTAA  | NM_016534:    | NM_016534:                               |
| 55010  | C12orf48  | chromosome 12 open reading frame 48                               | -3.67 | CAGAAATAGTTGACGGCAAAA  | NM_017915:    | NM_017915:                               |
| 55010  | C12orf48  | chromosome 12 open reading frame 48                               | -0.91 | CCCAATTTGCTGTACTTATA   | NM_017915:    | NM_017915:                               |
| 57213  | C13orf1   | chromosome 13 open reading frame 1                                | 1.05  | GACCATGTGCAATTAATGTA   | NM_020456:    | NM_020456:                               |
| 57213  | C13orf1   | chromosome 13 open reading frame 1                                | 0.47  | TAGTGGTTGATTAGTAATGTA  | NM_020456:    | NM_020456:                               |
| 80209  | C13orf23  | chromosome 13 open reading frame 23                               | 0.38  | TACAAGTAAGACTTAGGATAA  | NM_025138:    | NM_025138:NM_170719:                     |
| 80209  | C13orf23  | chromosome 13 open reading frame 23                               | -1.00 | AAGGAAGACCTAGCCGATATA  | NM_025138:    | NM_025138:NM_170719:                     |
| 25938  | C14orf125 | chromosome 14 open reading frame 125                              | -0.20 | CTAGGCATAATATTAGCTAAA  | XM_113763:    | XM_113763:                               |
| 25938  | C14orf125 | chromosome 14 open reading frame 125                              | -5.18 | CAGCCTTACAGTGCAACATAA  | XM_113763:    | XM_113763:                               |
| 55148  | C14orf130 | chromosome 14 open reading frame 130                              | -0.02 | ATCAGTTAACTCAGGCTGAA   | NM_018108:    | NM_018108:                               |
| 55148  | C14orf130 | chromosome 14 open reading frame 130                              | 0.17  | CACAATAGTACCGATCAGTTA  | NM_018108:    | NM_018108:                               |
| 79697  | C14orf169 | chromosome 14 open reading frame 169                              | 0.80  | CTGCTTGAGACAGATATTAGA  | NM_024644:    | NM_024644:                               |
| 79697  | C14orf169 | chromosome 14 open reading frame 169                              | -0.18 | ACCCAGTGTCTGGAAATATA   | NM_024644:    | NM_024644:                               |
| 115708 | C14orf172 | chromosome 14 open reading frame 172                              | 0.05  | CCAAAGTGTAGGATGAGCAA   | NM_152307:    | NM_152307:                               |
| 115708 | C14orf172 | chromosome 14 open reading frame 172                              | -1.62 | CGGCAGCGGCACGCCATGAA   | NM_152307:    | NM_152307:                               |
| 64223  | C14orf173 | chromosome 14 open reading frame 173                              | -5.74 | CCCGCCTTGATGCTACAACA   | NM_022489:    | NM_022489:NM_001031714:                  |
| 64223  | C14orf173 | chromosome 14 open reading frame 173                              | 1.11  | CCTGATTCTGATGATAATAAA  | NM_022489:    | NM_022489:                               |
| 64207  | C14orf4   | chromosome 14 open reading frame 4                                | -1.26 | CGGCATGGACTACGAAATTGAA | NM_024496:    | NM_024496:                               |
| 64207  | C14orf4   | chromosome 14 open reading frame 4                                | 1.09  | TGCGATCGAATTCGTGATCGA  | NM_024496:    | NM_024496:                               |
| 283600 | C14orf68  | chromosome 14 open reading frame 68                               | -0.59 | CACGGTGAAGGTCCAGATCCA  | NM_207117:    | NM_207117:                               |
| 283600 | C14orf68  | chromosome 14 open reading frame 68                               | -1.24 | TTGGAACTGTTGCAATAAAA   | NM_207117:    | NM_207117:                               |
| 57184  | C15orf17  | chromosome 15 open reading frame 17                               | -4.65 | TAGTTCTACATGGGAAAGTA   | NM_020447:    | NM_020447:                               |
| 57184  | C15orf17  | chromosome 15 open reading frame 17                               | 0.01  | CAGTCTTTGAGCTAAAGATTA  | NM_020447:    | NM_020447:                               |
| 123591 | C15orf27  | chromosome 15 open reading frame 27                               | -1.08 | CAGCAGGGCAGTACTATTGTA  | NM_152335:    | NM_152335:                               |
| 123591 | C15orf27  | chromosome 15 open reading frame 27                               | 0.94  | CAGCTACATCAGTCAAGTATA  | NM_152335:    | NM_152335:                               |
| 65259  | C16orf28  | chromosome 16 open reading frame 28                               | 1.06  | TCGAATTAAGTGCAATAGTA   | NM_023076:    | NM_023076:                               |
| 65259  | C16orf28  | chromosome 16 open reading frame 28                               | 1.40  | ATGGGATAATTAAGGCTTTA   | NM_023076:    | NM_023076:                               |
| 79622  | C16orf33  | chromosome 16 open reading frame 33                               | -2.45 | ACGGCCTGGCCCACTGTATAA  | NM_024571:    | NM_024571:                               |
| 79622  | C16orf33  | chromosome 16 open reading frame 33                               | 1.01  | CCAGGCATGCCCAACAGTAA   | NM_024571:    | NM_024571:                               |
| 55839  | C16orf60  | chromosome 16 open reading frame 60                               | 1.04  | AACACAGTACACAAGCCAAA   | NM_018455:    | NM_018455:                               |

|        |               |                                                 |       |                        |            |                                                                                                                                                  |
|--------|---------------|-------------------------------------------------|-------|------------------------|------------|--------------------------------------------------------------------------------------------------------------------------------------------------|
| 55839  | C16orf60      | chromosome 16 open reading frame 60             | 1.34  | TTGCAATTAGTGAACATGAAA  | NM_018455: | NM_018455:                                                                                                                                       |
| 57674  | C17orf27      | chromosome 17 open reading frame 27             | 2.45  | TCAGCGTAGCACCGAATTCAA  | NM_020914: | NM_020914:                                                                                                                                       |
| 57674  | C17orf27      | chromosome 17 open reading frame 27             | 0.89  | ACGAACCGGTGAGATCAACCTA | NM_020914: | NM_020914:                                                                                                                                       |
| 284021 | C17orf60 (chr | chromosome 17 open reading frame 60             | 0.78  | CTGAATCGCTTTAGTAATAAA  | XM_211305: | XM_211305:                                                                                                                                       |
| 284021 | C17orf60 (chr | chromosome 17 open reading frame 60             | 1.05  | CTGAACATTATGGCTATTCAA  | XM_211305: | XM_211305:                                                                                                                                       |
| 64149  | C17orf75      | chromosome 17 open reading frame 75             | -1.01 | TTGAGTTACACTCTGTGAA    | NM_022344: | NM_022344:                                                                                                                                       |
| 64149  | C17orf75      | chromosome 17 open reading frame 75             | 0.36  | TTGGCAGATACTAATCTACCA  | NM_022344: | NM_022344:                                                                                                                                       |
| 753    | C18orf1 (chro | chromosome 18 open reading frame 1              | -0.40 | CGGGAGAGGGTTAGAGCTATA  | NM_181483: | NM_181481:NM_181482:NM_181483:NM_004338:<br>NM_001003674:NM_001003675:<br>NM_181481:NM_181482:NM_181483:NM_004338:<br>NM_001003674:NM_001003675: |
| 753    | C18orf1 (chro | chromosome 18 open reading frame 1              | 0.67  | CCACGTGTTGTTCCATCGTA   | NM_181483: | NM_181483:                                                                                                                                       |
| 10438  | C1D           | nuclear DNA-binding protein                     | 1.41  | CACAGTAAATATGTAAGCTA   | NM_006333: | NM_006333:NM_173177:                                                                                                                             |
| 10438  | C1D           | nuclear DNA-binding protein                     | 0.64  | CAGCTGTGAAATTAAGTGAA   | NM_006333: | NM_006333:NM_173177:                                                                                                                             |
| 55732  | C1orf112      | chromosome 1 open reading frame 112             | -0.01 | CTGGTGTGATGCTTTGTCAA   | NM_018186: | NM_018186:                                                                                                                                       |
| 55732  | C1orf112      | chromosome 1 open reading frame 112             | -1.26 | CAGCCTGGCTTCAATGGAAA   | NM_018186: | NM_018186:                                                                                                                                       |
| 83932  | C1orf124      | chromosome 1 open reading frame 124             | -0.50 | CTGAACCTGATGTAATCTTCA  | NM_032018: | NM_032018:NM_001010984:                                                                                                                          |
| 83932  | C1orf124      | chromosome 1 open reading frame 124             | -1.42 | ACGACCTAGGCTAGAAGTAA   | NM_032018: | NM_032018:NM_001010984:                                                                                                                          |
| 55182  | C1orf164      | chromosome 1 open reading frame 164             | -0.98 | CTGGTGTTCAGTGGTGATA    | NM_018150: | NM_018150:                                                                                                                                       |
| 55182  | C1orf164      | chromosome 1 open reading frame 164             | -2.91 | CCCAATCAGTATGCTGAATCA  | NM_018150: | NM_018150:                                                                                                                                       |
| 79594  | C1orf166      | chromosome 1 open reading frame 166             | -0.81 | CAGGAATTAACATGTTGCAA   | NM_024544: | NM_024544:                                                                                                                                       |
| 79594  | C1orf166      | chromosome 1 open reading frame 166             | -0.99 | CAGCTTTCAGCATCTGGTGTA  | NM_024544: | NM_024544:                                                                                                                                       |
| 149281 | C1orf184 (chr | chromosome 1 open reading frame 184             | -0.03 | CTGGTGAATTTGACGCTTAA   | XM_089281: | XM_089281:                                                                                                                                       |
| 149281 | C1orf184 (chr | chromosome 1 open reading frame 184             | -0.18 | CAGTCTATGCCAGAGCTAAA   | XM_089281: | XM_089281:                                                                                                                                       |
| 51154  | C1orf33       | chromosome 1 open reading frame 33              | -0.29 | AAGGCTTGGAAATGAACAAA   | NM_016183: | NM_016183:                                                                                                                                       |
| 51154  | C1orf33       | chromosome 1 open reading frame 33              | -0.04 | TACGCCGAGCTGGTAACAAA   | NM_016183: | NM_016183:                                                                                                                                       |
| 114897 | C1QTNF1       | C1q and tumor necrosis factor related protein 1 | 2.02  | TTCAAGTGGAGACTGCTCTAA  | NM_030968: | NM_198594:NM_198593:NM_030968:                                                                                                                   |
| 114897 | C1QTNF1       | C1q and tumor necrosis factor related protein 1 | 1.27  | AAGGGTAGCCGCGAGATCGA   | NM_030968: | NM_198594:NM_198593:NM_030968:                                                                                                                   |
| 715    | C1R (comple   | complement component 1, r subcomponent          | 0.15  | TCGGGAGAGCCAGGATTCAA   | NM_001733: | NM_001733:                                                                                                                                       |
| 715    | C1R (comple   | complement component 1, r subcomponent          | 0.22  | CCGGGAAAGAAAGGAATTTAT  | NM_001733: | NM_001733:                                                                                                                                       |
| 51279  | C1RL          | complement component 1, r subcomponent-like     | 0.07  | CAGCTCCAAGATGCAATTATA  | NM_016546: | NM_016546:                                                                                                                                       |
| 51279  | C1RL          | complement component 1, r subcomponent-like     | 1.30  | CCCGTCTGTCTGCCCGATAA   | NM_016546: | NM_016546:                                                                                                                                       |
| 716    | C1S (comple   | complement component 1, s subcomponent          | 0.09  | CCCGAGTACCTATTGTAGAT   | NM_001734: | NM_201442:NM_001734:                                                                                                                             |
| 716    | C1S (comple   | complement component 1, s subcomponent          | 1.09  | GAGGTAGAGTTGATCATAGA   | NM_001734: | NM_201442:NM_001734:                                                                                                                             |
| 717    | C2            | complement component 2                          | 0.63  | CCAGTTATGAAATTAATAAA   | NM_000063: | NM_000063:                                                                                                                                       |
| 717    | C2            | complement component 2                          | -0.25 | ACCCTGGCATGCTACTATTA   | NM_000063: | NM_000063:                                                                                                                                       |
| 92747  | C20orf114     | chromosome 20 open reading frame 114            | 0.00  | ATCCCTCTCTGCAATCAATA   | NM_033197: | NM_033197:                                                                                                                                       |
| 92747  | C20orf114     | chromosome 20 open reading frame 114            | 0.05  | CGGAACCGAATGGCAATTA    | NM_033197: | NM_033197:                                                                                                                                       |
| 55184  | C20orf12      | chromosome 20 open reading frame 12             | -0.18 | TGGCTCCTAATTACTATGTA   | NM_018152: | NM_018152:                                                                                                                                       |
| 55184  | C20orf12      | chromosome 20 open reading frame 12             | -0.58 | CTGAATTATAGTCAAGTCTCA  | NM_018152: | NM_018152:                                                                                                                                       |
| 81610  | C20orf129     | chromosome 20 open reading frame 129            | -1.16 | CCAGGATAGCAAGCTCTCAA   | NM_030919: | NM_030919:                                                                                                                                       |
| 81610  | C20orf129     | chromosome 20 open reading frame 129            | -0.70 | ATAGACGGATGGCAAAATTA   | NM_030919: | NM_030919:                                                                                                                                       |
| 24148  | C20orf14      | chromosome 20 open reading frame 14             | -0.78 | CACCAATTACGATGAGTTTAA  | NM_012469: | NM_012469:                                                                                                                                       |
| 24148  | C20orf14      | chromosome 20 open reading frame 14             | -0.92 | TACGATGAGTTTAAATGGCTAT | NM_012469: | NM_012469:                                                                                                                                       |
| 140706 | C20orf160     | chromosome 20 open reading frame 160            | -3.28 | CACCCGATAAGAGCTCAATA   | NM_080625: | NM_080625:                                                                                                                                       |
| 140706 | C20orf160     | chromosome 20 open reading frame 160            | -1.94 | CTGAGGTTAAGACCTTAGAA   | NM_080625: | NM_080625:                                                                                                                                       |
| 90203  | C20orf161     | chromosome 20 open reading frame 161            | 0.05  | CTGGCCCTGGACAAACGCTAA  | NM_033421: | NM_033421:                                                                                                                                       |
| 90203  | C20orf161     | chromosome 20 open reading frame 161            | -1.25 | AAGACCTGATGAGAACAGAA   | NM_033421: | NM_033421:                                                                                                                                       |
| 10616  | C20orf18      | chromosome 20 open reading frame 18             | -2.17 | CCCTGTGTGTTCCACGTCAA   | NM_006462: | NM_006462:NM_031229:NM_031228:NM_031227:                                                                                                         |
| 10616  | C20orf18      | chromosome 20 open reading frame 18             | 0.61  | GAGGATTACCAGCGATTCTTA  | NM_006462: | NM_006462:NM_031229:NM_031228:NM_031227:                                                                                                         |
| 359710 | C20orf185     | chromosome 20 open reading frame 185            | 0.82  | CAGTGATGCACCAAGCTTAA   | NM_182658: | NM_182658:                                                                                                                                       |
| 359710 | C20orf185     | chromosome 20 open reading frame 185            | 0.65  | ACGGATCGCGTTTAGAAGATA  | NM_182658: | NM_182658:                                                                                                                                       |
| 149954 | C20orf186     | chromosome 20 open reading frame 186            | -2.12 | CCAGTATATACCAACCGCAA   | NM_182519: | NM_182519:                                                                                                                                       |
| 149954 | C20orf186     | chromosome 20 open reading frame 186            | 0.79  | CCCAATCTCGTGACAATTTA   | NM_182519: | NM_182519:                                                                                                                                       |
| 55614  | C20orf23      | chromosome 20 open reading frame 23             | -0.47 | AACGAACGTGTGAGAGATCTA  | NM_024704: | NM_024704:                                                                                                                                       |
| 55614  | C20orf23      | chromosome 20 open reading frame 23             | 1.71  | GAGGATTTATCCAAACATTTA  | NM_024704: | NM_024704:                                                                                                                                       |
| 55614  | C20orf23      | chromosome 20 open reading frame 23             | -0.77 | AACGAACGTGTGAGAGATCTA  | NM_024704: | NM_024704:                                                                                                                                       |
| 55614  | C20orf23      | chromosome 20 open reading frame 23             | 0.76  | CACCTTTGAATTCACCTGCAA  | NM_024704: | NM_024704:                                                                                                                                       |
| 79133  | C20orf7       | chromosome 20 open reading frame 7              | -0.76 | ATGGATAGCTTTAACATCTAA  | NM_024120: | NM_024120:NM_199052:                                                                                                                             |
| 79133  | C20orf7       | chromosome 20 open reading frame 7              | 0.79  | AAGAGTTTACATGGCAATAA   | NM_024120: | NM_024120:NM_199052:                                                                                                                             |
| 140731 | C20orf86      | chromosome 20 open reading frame 86             | 1.45  | GAGGGCGTTTGGGGCTTGTAA  | NM_080674: | NM_080674:                                                                                                                                       |
| 140731 | C20orf86      | chromosome 20 open reading frame 86             | -0.07 | AACCGCAAAATCAGAACATTT  | NM_080674: | NM_080674:                                                                                                                                       |
| 79019  | C22orf18      | chromosome 22 open reading frame 18             | -3.31 | CAGCAAATACAGCTCCAGAA   | NM_024053: | NM_001002876:NM_024053:                                                                                                                          |
| 79019  | C22orf18      | chromosome 22 open reading frame 18             | -0.40 | CCTGATCGTGTGTTGGTTAA   | NM_024053: | NM_001002876:NM_024053:                                                                                                                          |
| 51374  | C2orf28       | chromosome 2 open reading frame 28              | -2.90 | AAGCCAAGACTCATGAACCTA  | NM_016085: | NM_080592:NM_016085:                                                                                                                             |
| 51374  | C2orf28       | chromosome 2 open reading frame 28              | 0.70  | CTGAATACTATCACCTCTTA   | NM_016085: | NM_080592:NM_016085:                                                                                                                             |
| 718    | C3            | complement component 3                          | -0.59 | TAGGAACCCCTCATCATCTA   | NM_000064: | NM_000064:                                                                                                                                       |
| 718    | C3            | complement component 3                          | 0.05  | CACGGAGAAGCGAATGGACAA  | NM_000064: | NM_000064:                                                                                                                                       |
| 719    | C3AR1         | complement component 3a receptor 1              | 0.49  | CTGCTAGGTTAACAAGTCAA   | NM_004054: | NM_004054:                                                                                                                                       |
| 719    | C3AR1         | complement component 3a receptor 1              | 0.19  | TCGCTGTCTTGGTATTCAA    | NM_004054: | NM_004054:                                                                                                                                       |
| 64419  | C3orf29       | chromosome 3 open reading frame 29              | -4.92 | AAGGTGAAGTTGGCATGAA    | NM_022485: | NM_022485:                                                                                                                                       |
| 64419  | C3orf29       | chromosome 3 open reading frame 29              | -1.00 | CTGCCAGTAATCCTGTTCAA   | NM_022485: | NM_022485:                                                                                                                                       |
| 285237 | C3orf38       | chromosome 3 open reading frame 38              | -0.27 | CTGGTTTACCTGACCCCTCTA  | NM_173824: | NM_173824:                                                                                                                                       |
| 285237 | C3orf38       | chromosome 3 open reading frame 38              | -0.92 | ATGAAGTACGACATAATGTA   | NM_173824: | NM_173824:                                                                                                                                       |
| 93556  | C3orf50 (chro | chromosome 3 open reading frame 50              | 1.86  | CACAGCGTTTATGATACTGAA  | XM_376284: | XM_376284:                                                                                                                                       |
| 93556  | C3orf50 (chro | chromosome 3 open reading frame 50              | 0.48  | TTCAATGGATTAGAAGCTAA   | XM_376284: | XM_376284:                                                                                                                                       |
| 727    | C5            | complement component 5                          | -0.77 | CCGCTTGGATGGACATCGA    | NM_001735: | NM_001735:                                                                                                                                       |
| 727    | C5            | complement component 5                          | -0.02 | GCCTGCGTTAATATGATGAA   | NM_001735: | NM_001735:                                                                                                                                       |
| 728    | C5AR1         | complement component 5a receptor 1              | 0.76  | CCGGAACGTTGACTGAAGA    | NM_001736: | NM_001736:                                                                                                                                       |
| 728    | C5AR1         | complement component 5a receptor 1              | -0.81 | TCGTGGGATGGTGTACCTTA   | NM_001736: | NM_001736:                                                                                                                                       |
| 79770  | C5orf14       | chromosome 5 open reading frame 14              | -2.65 | CCGGGAGAAATGAGTAGAA    | NM_024715: | NM_024715:                                                                                                                                       |
| 79770  | C5orf14       | chromosome 5 open reading frame 14              | -0.47 | CTGCATGAACGTAATCCAGTA  | NM_024715: | NM_024715:                                                                                                                                       |
| 729    | C6 (comple    | complement component 6                          | -2.87 | TAGGATCCATAAAGTGATGAA  | NM_000065: | NM_000065:                                                                                                                                       |
| 729    | C6 (comple    | complement component 6                          | -1.07 | CATCGTGAAGTGGTAAGAAA   | NM_000065: | NM_000065:                                                                                                                                       |
| 80739  | C6orf25       | chromosome 6 open reading frame 25              | -1.40 | CACGAGGACGAGAGCGGTACA  | NM_025260: | NM_025260:NM_138276:NM_138277:NM_138274:<br>NM_138275:NM_138272:NM_138273:                                                                       |
| 80739  | C6orf25       | chromosome 6 open reading frame 25              | -2.06 | CAGCCTTTGCTCGGGCGCCTA  | NM_025260: | NM_025260:NM_138276:NM_138277:NM_138274:<br>NM_138275:NM_138272:NM_138273:                                                                       |
| 222658 | C6orf69       | chromosome 6 open reading frame 69              | -0.22 | CCGGTCTGAAGTCACTATAA   | NM_173562: | NM_173562:                                                                                                                                       |
| 222658 | C6orf69       | chromosome 6 open reading frame 69              | 0.37  | TAGCATCACTGTGGAATTTAA  | NM_173562: | NM_173562:                                                                                                                                       |
| 80129  | C6orf97       | chromosome 6 open reading frame 97              | -2.06 | CAACCGTCTGTGAGTCACTAA  | NM_025059: | NM_025059:                                                                                                                                       |
| 80129  | C6orf97       | chromosome 6 open reading frame 97              | -0.08 | AAGCTCTAGCATGAAATTTAA  | NM_025059: | NM_025059:                                                                                                                                       |
| 730    | C7 (comple    | complement component 7                          | 0.31  | CCGAAGATTAATGACACGATA  | NM_000587: | NM_000587:                                                                                                                                       |
| 730    | C7 (comple    | complement component 7                          | -0.72 | AAGGATTAGAACACTCATTA   | NM_000587: | NM_000587:                                                                                                                                       |
| 83590  | C7orf21       | chromosome 7 open reading frame 21              | -1.12 | GCAGATTAAGTAACTGTGAA   | NM_031434: | NM_031434:                                                                                                                                       |
| 83590  | C7orf21       | chromosome 7 open reading frame 21              | -0.57 | CCCGGAACCCGTGCAGATTTAA | NM_031434: | NM_031434:                                                                                                                                       |
| 64111  | C7orf9        | chromosome 7 open reading frame 9               | 0.26  | AAACATTATGATGGAATTTAA  | NM_022150: | NM_022150:                                                                                                                                       |
| 64111  | C7orf9        | chromosome 7 open reading frame 9               | 1.42  | ATCGTGTCAAATGTTAATGAA  | NM_022150: | NM_022150:                                                                                                                                       |



|        |                                                                        |       |                        |            |                                                                                                                                                                                                                                                                                                                                |
|--------|------------------------------------------------------------------------|-------|------------------------|------------|--------------------------------------------------------------------------------------------------------------------------------------------------------------------------------------------------------------------------------------------------------------------------------------------------------------------------------|
| 731    | C8A (complement component 8, alpha polypeptide)                        | 0.31  | CTGGATGTTGACTGTTAACTA  | NM_000562: | NM_000562:                                                                                                                                                                                                                                                                                                                     |
| 731    | C8A (complement component 8, alpha polypeptide)                        | 1.67  | CACCTATAGAAACATATTTAA  | NM_000562: | NM_000562:                                                                                                                                                                                                                                                                                                                     |
| 732    | C8B (complement component 8, beta polypeptide)                         | -1.52 | CACGAGGTTTAGGAAGCCCTA  | NM_000066: | NM_000066:                                                                                                                                                                                                                                                                                                                     |
| 732    | C8B (complement component 8, beta polypeptide)                         | 0.61  | CTGGAGTTCATGCAAGGCA    | NM_000066: | NM_000066:                                                                                                                                                                                                                                                                                                                     |
| 733    | C8G complement component 8, gamma polypeptide                          | 0.82  | CCAGAGTTCGCTGTCCTGTA   | NM_000606: | NM_000606:                                                                                                                                                                                                                                                                                                                     |
| 733    | C8G complement component 8, gamma polypeptide                          | 0.02  | GAGTGGTACCTACTTATTTAA  | NM_000606: | NM_000606:                                                                                                                                                                                                                                                                                                                     |
| 735    | C9 (complement component 9)                                            | 1.18  | GCGGAAAGGTGTTGAACATA   | NM_001737: | NM_001737:                                                                                                                                                                                                                                                                                                                     |
| 735    | C9 (complement component 9)                                            | -2.51 | TAGGAGGACTGTAACTAA     | NM_001737: | NM_001737:                                                                                                                                                                                                                                                                                                                     |
| 51490  | C9orf114 chromosome 9 open reading frame 114                           | 0.94  | CCGGACACCTGAAAGTTCTA   | NM_016390: | NM_016390:                                                                                                                                                                                                                                                                                                                     |
| 51490  | C9orf114 chromosome 9 open reading frame 114                           | -0.44 | TGGGTGACTGTGCGACTGAA   | NM_016390: | NM_016390:                                                                                                                                                                                                                                                                                                                     |
| 254956 | C9orf18 chromosome 9 open reading frame 18                             | -0.03 | CACGAGGGTAGTCAAGGACTA  | NM_198469: | NM_198469:                                                                                                                                                                                                                                                                                                                     |
| 254956 | C9orf18 chromosome 9 open reading frame 18                             | 0.22  | TAGGAACCCGTTTCTAAGAAA  | NM_198469: | NM_198469:                                                                                                                                                                                                                                                                                                                     |
| 28989  | C9orf32 chromosome 9 open reading frame 32                             | 0.22  | ACGGAGGACTTCTGGTTCAA   | NM_014064: | NM_014064:                                                                                                                                                                                                                                                                                                                     |
| 347240 | C9orf48 chromosome 9 open reading frame 48                             | -0.79 | CCGGGTCAAAGAACTAAAGAA  | NM_194313: | NM_194313:                                                                                                                                                                                                                                                                                                                     |
| 347240 | C9orf48 chromosome 9 open reading frame 48                             | 1.21  | ACCTATTCTATCATATATA    | NM_194313: | NM_194313:                                                                                                                                                                                                                                                                                                                     |
| 158427 | C9orf97 chromosome 9 open reading frame 97                             | -2.34 | ACCACGATGTGTAAATCA     | NM_139246: | NM_139246:                                                                                                                                                                                                                                                                                                                     |
| 158427 | C9orf97 chromosome 9 open reading frame 97                             | -1.93 | AAGGTCAACTGTATAGTTTA   | NM_139246: | NM_139246:                                                                                                                                                                                                                                                                                                                     |
| 759    | CA1 carbonic anhydrase I                                               | 1.77  | CAGTTTATTTGAACCAATA    | NM_001738: | NM_001738:                                                                                                                                                                                                                                                                                                                     |
| 759    | CA1 carbonic anhydrase I                                               | 0.83  | CTAGCAAAATGTAATCTGTAA  | NM_001738: | NM_001738:                                                                                                                                                                                                                                                                                                                     |
| 56934  | CA10 carbonic anhydrase X                                              | 0.59  | AAGTTGGATCATAATGAACA   | NM_020178: | NM_020178:                                                                                                                                                                                                                                                                                                                     |
| 56934  | CA10 carbonic anhydrase X                                              | 0.62  | AACCATGAGCTATATACGAAT  | NM_020178: | NM_020178:                                                                                                                                                                                                                                                                                                                     |
| 770    | CA11 carbonic anhydrase XI                                             | 0.15  | GACAGAATACTCTCTGTTTAA  | NM_001217: | NM_001217:                                                                                                                                                                                                                                                                                                                     |
| 770    | CA11 carbonic anhydrase XI                                             | 0.04  | CTCATTCACTCAACCAGGAA   | NM_001217: | NM_001217:                                                                                                                                                                                                                                                                                                                     |
| 771    | CA12 carbonic anhydrase XII                                            | -0.68 | CACACTGTAACTACAAGAAAT  | NM_001218: | NM_001218; NM_206925:                                                                                                                                                                                                                                                                                                          |
| 771    | CA12 carbonic anhydrase XII                                            | 1.63  | ATCAAATATATTTCAAGCTAT  | NM_001218: | NM_001218; NM_206925:                                                                                                                                                                                                                                                                                                          |
| 377677 | CA13 carbonic anhydrase XIII                                           | -0.04 | CAGAGGGACACTAAGCATTA   | NM_198584: | NM_198584:                                                                                                                                                                                                                                                                                                                     |
| 377677 | CA13 carbonic anhydrase XIII                                           | -0.16 | CTCAGTGATGTAGATGGAAA   | NM_198584: | NM_198584:                                                                                                                                                                                                                                                                                                                     |
| 23632  | CA14 (carbonic anhydrase XIV)                                          | 0.54  | CGGGATCTCTCTTAGGATA    | NM_012113: | NM_012113:                                                                                                                                                                                                                                                                                                                     |
| 23632  | CA14 (carbonic anhydrase XIV)                                          | -0.75 | AAGCAGGATCTCGTATACCA   | NM_012113: | NM_012113:                                                                                                                                                                                                                                                                                                                     |
| 760    | CA2 carbonic anhydrase II                                              | 1.67  | CGGTTGTTCTCTTAGCTAA    | NM_000067: | NM_000067:                                                                                                                                                                                                                                                                                                                     |
| 760    | CA2 carbonic anhydrase II                                              | 1.08  | CAGGTGTGAAATTCGGTAAA   | NM_000067: | NM_000067:                                                                                                                                                                                                                                                                                                                     |
| 761    | CA3 carbonic anhydrase III, muscle specific                            | 0.70  | GAGGTGTATGAAGATCATATA  | NM_005181: | NM_005181:                                                                                                                                                                                                                                                                                                                     |
| 761    | CA3 carbonic anhydrase III, muscle specific                            | 1.64  | AAGCATAGATTTCACATTTGA  | NM_005181: | NM_005181:                                                                                                                                                                                                                                                                                                                     |
| 762    | CA4 carbonic anhydrase IV                                              | -1.35 | CTGGTCCGACTGGCCATATA   | NM_000717: | NM_000717:                                                                                                                                                                                                                                                                                                                     |
| 762    | CA4 carbonic anhydrase IV                                              | -2.49 | CTGGCTACGATAAAGCAAAA   | NM_000717: | NM_000717:                                                                                                                                                                                                                                                                                                                     |
| 763    | CA5A carbonic anhydrase VA, mitochondrial                              | -0.56 | CACAAGGCTCTAGAGACATTA  | NM_001739: | NM_001739:                                                                                                                                                                                                                                                                                                                     |
| 763    | CA5A carbonic anhydrase VA, mitochondrial                              | 0.85  | AGCGTTGTTTCCCAAGTTTCA  | NM_001739: | NM_001739:                                                                                                                                                                                                                                                                                                                     |
| 11238  | CA5B carbonic anhydrase VB, mitochondrial                              | -0.01 | TAGTGGTCTTATAGCACTATA  | NM_007220: | NM_007220:                                                                                                                                                                                                                                                                                                                     |
| 11238  | CA5B carbonic anhydrase VB, mitochondrial                              | 2.18  | TACAGATAAATCAGTGATVA   | NM_007220: | NM_007220:                                                                                                                                                                                                                                                                                                                     |
| 340591 | CA5BL carbonic anhydrase VB-like                                       | -0.10 | CAGATAAATCAGGCTGTACAA  | XM_291346: | XM_291346:                                                                                                                                                                                                                                                                                                                     |
| 765    | CA6 carbonic anhydrase VI                                              | 1.59  | GAGGAAATCTTGACTACTTA   | NM_001215: | NM_001215:                                                                                                                                                                                                                                                                                                                     |
| 765    | CA6 carbonic anhydrase VI                                              | -0.38 | CGGAATCAGGAATCACTCTA   | NM_001215: | NM_001215:                                                                                                                                                                                                                                                                                                                     |
| 766    | CA7 carbonic anhydrase VII                                             | 0.49  | CTGGCTATAGCTTATACAGTA  | NM_005182: | NM_005182; NM_001014435:                                                                                                                                                                                                                                                                                                       |
| 766    | CA7 carbonic anhydrase VII                                             | 0.01  | CCAGAGAGACTCAAGCAATA   | NM_005182: | NM_005182; NM_001014435:                                                                                                                                                                                                                                                                                                       |
| 767    | CA8 carbonic anhydrase VIII                                            | 0.52  | CACCTGGATTTATTTCCGATA  | NM_004056: | NM_004056:                                                                                                                                                                                                                                                                                                                     |
| 767    | CA8 carbonic anhydrase VIII                                            | 1.30  | CACGGTTAATTTCAAAGCTTT  | NM_004056: | NM_004056:                                                                                                                                                                                                                                                                                                                     |
| 768    | CA9 carbonic anhydrase IX                                              | -2.35 | CTGGCTGCTGGTACACTCTA   | NM_001216: | NM_001216:                                                                                                                                                                                                                                                                                                                     |
| 768    | CA9 carbonic anhydrase IX                                              | -1.19 | CAGCCGCTACTCCAATATGA   | NM_001216: | NM_001216:                                                                                                                                                                                                                                                                                                                     |
| 23523  | CABIN1 calcineurin binding protein 1                                   | -1.36 | CCACGATTACGTCAAATGTAA  | NM_012295: | NM_012295:                                                                                                                                                                                                                                                                                                                     |
| 23523  | CABIN1 calcineurin binding protein 1                                   | -1.38 | AAGGATTGATTTGTCGGACTA  | NM_012295: | NM_012295:                                                                                                                                                                                                                                                                                                                     |
| 57685  | CACHD1 cache domain containing 1                                       | 2.74  | ACGACAAGGATATACACTTA   | NM_020925: | NM_020925:                                                                                                                                                                                                                                                                                                                     |
| 57685  | CACHD1 cache domain containing 1                                       | -0.01 | CCGCACTAGATTTCTGTGTTA  | NM_020925: | NM_020925:                                                                                                                                                                                                                                                                                                                     |
| 773    | CACNA1A calcium channel, voltage-dependent, P/Q type, alpha 1A subunit | 0.42  | CGGGTGTACGACCTCTTAAA   | NM_000068: | NM_000068; NM_023035:                                                                                                                                                                                                                                                                                                          |
| 773    | CACNA1A calcium channel, voltage-dependent, P/Q type, alpha 1A subunit | -0.01 | CGGGTGTACGACCTCTTAAA   | NM_000068: | NM_000068; NM_023035:                                                                                                                                                                                                                                                                                                          |
| 774    | CACNA1B calcium channel, voltage-dependent, L type, alpha 1B subunit   | 0.44  | TGCAATTTGGCTCTGACCTTAA | NM_000718: | NM_000718:                                                                                                                                                                                                                                                                                                                     |
| 774    | CACNA1B calcium channel, voltage-dependent, L type, alpha 1B subunit   | -0.34 | CCGGCAGTCTCCAGTATAA    | NM_000718: | NM_000718:                                                                                                                                                                                                                                                                                                                     |
| 775    | CACNA1C calcium channel, voltage-dependent, L type, alpha 1C subunit   | 0.52  | CCGGAGGAGCACATTCGATA   | NM_000719: | NM_000719:                                                                                                                                                                                                                                                                                                                     |
| 775    | CACNA1C calcium channel, voltage-dependent, L type, alpha 1C subunit   | 0.76  | CTGGTTTGGTTCGGTTATCTA  | NM_000719: | NM_000719:                                                                                                                                                                                                                                                                                                                     |
| 776    | CACNA1D calcium channel, voltage-dependent, L type, alpha 1D subunit   | 0.28  | CACGCGAAGGAGGCAAACTAT  | NM_000720: | NM_000720:                                                                                                                                                                                                                                                                                                                     |
| 776    | CACNA1D calcium channel, voltage-dependent, L type, alpha 1D subunit   | 0.34  | CCAGATCAATAGGAACAATAA  | NM_000720: | NM_000720:                                                                                                                                                                                                                                                                                                                     |
| 777    | CACNA1E calcium channel, voltage-dependent, alpha 1E subunit           | 1.12  | ATGCTTTAAGTGATTAGTAA   | NM_000721: | NM_000721:                                                                                                                                                                                                                                                                                                                     |
| 777    | CACNA1E calcium channel, voltage-dependent, alpha 1E subunit           | -1.65 | CCGCGTACGAGCAGGAGGCAA  | NM_000721: | NM_000721:                                                                                                                                                                                                                                                                                                                     |
| 778    | CACNA1F calcium channel, voltage-dependent, alpha 1F subunit           | -0.15 | CCGGACATCCCTGAAGATCAA  | NM_005183: | NM_005183:                                                                                                                                                                                                                                                                                                                     |
| 778    | CACNA1F calcium channel, voltage-dependent, alpha 1F subunit           | -4.18 | CTGGCTGCACTGCTATACAA   | NM_005183: | NM_005183:                                                                                                                                                                                                                                                                                                                     |
| 8913   | CACNA1G calcium channel, voltage-dependent, alpha 1G subunit           | 1.07  | TACGTTTGCGCAATCTCTA    | NM_018896: | NM_018896; NM_198379; NM_198388; NM_198378; NM_198377; NM_018896; NM_198386; NM_198376; NM_198382; NM_198384; NM_198383; NM_198385; NM_198380; NM_198387; NM_198396; NM_198379; NM_198388; NM_198378; NM_198377; NM_018896; NM_198386; NM_198376; NM_198382; NM_198384; NM_198383; NM_198385; NM_198380; NM_198387; NM_198396; |
| 8913   | CACNA1G calcium channel, voltage-dependent, alpha 1G subunit           | -2.71 | CACGGTCACTCGCCTATCTA   | NM_018896: | NM_018896; NM_198379; NM_198388; NM_198378; NM_198377; NM_018896; NM_198386; NM_198376; NM_198382; NM_198384; NM_198383; NM_198385; NM_198380; NM_198387; NM_198396;                                                                                                                                                           |
| 8912   | CACNA1H calcium channel, voltage-dependent, alpha 1H subunit           | -2.06 | CACGAGAACATCTCCACCAA   | NM_021098: | NM_021098; NM_001005407;                                                                                                                                                                                                                                                                                                       |
| 8912   | CACNA1H calcium channel, voltage-dependent, alpha 1H subunit           | 0.05  | CTGAAGTACGTTGGGCCACATA | NM_021098: | NM_021098; NM_001005407;                                                                                                                                                                                                                                                                                                       |
| 8911   | CACNA1I calcium channel, voltage-dependent, alpha 1I subunit           | 0.99  | CCGGTGTAGATGCTCTCTTTA  | NM_021096: | NM_001003406; NM_021096;                                                                                                                                                                                                                                                                                                       |
| 8911   | CACNA1I calcium channel, voltage-dependent, alpha 1I subunit           | -1.37 | CAGCGTCTCTTTAATCATCAA  | NM_021096: | NM_001003406; NM_021096;                                                                                                                                                                                                                                                                                                       |
| 779    | CACNA1S calcium channel, voltage-dependent, L type, alpha 1S subunit   | -1.75 | CCGCAGGGCAGCAAGATCAA   | NM_000069: | NM_000069;                                                                                                                                                                                                                                                                                                                     |
| 779    | CACNA1S calcium channel, voltage-dependent, L type, alpha 1S subunit   | -1.81 | CCGGCTGATTCCATGAGAAA   | NM_000069: | NM_000069;                                                                                                                                                                                                                                                                                                                     |
| 781    | CACNA2D1 calcium channel, voltage-dependent, alpha 2/delta subunit 1   | 0.15  | CCGCCTGTTATGACCTTCTAA  | NM_000722: | NM_000722;                                                                                                                                                                                                                                                                                                                     |
| 781    | CACNA2D1 calcium channel, voltage-dependent, alpha 2/delta subunit 1   | 2.12  | TTGATAACGACAGTAAATCA   | NM_000722: | NM_000722;                                                                                                                                                                                                                                                                                                                     |
| 9254   | CACNA2D2 calcium channel, voltage-dependent, alpha 2/delta subunit 2   | -0.67 | CTGGAACATTGAGGATGGAAA  | NM_006030: | NM_001005505; NM_006030;                                                                                                                                                                                                                                                                                                       |
| 9254   | CACNA2D2 calcium channel, voltage-dependent, alpha 2/delta subunit 2   | 0.38  | CAACCTGATGCTGGCAGCTCTA | NM_006030: | NM_001005505; NM_006030;                                                                                                                                                                                                                                                                                                       |
| 55799  | CACNA2D3 calcium channel, voltage-dependent, alpha 2/delta 3 subunit   | -0.33 | CACGACTGGACAGCAATATA   | NM_018398: | NM_018398;                                                                                                                                                                                                                                                                                                                     |
| 55799  | CACNA2D3 calcium channel, voltage-dependent, alpha 2/delta 3 subunit   | 2.07  | AGGATTAAGCTCTACCTAAA   | NM_018398: | NM_018398;                                                                                                                                                                                                                                                                                                                     |
| 93589  | CACNA2D4 (calcium channel, voltage-dependent, alpha 2/delta subunit 4  | 0.59  | TGGCATATACCTAAACGCTAAA | NM_172364: | NM_172364; NM_001005747; NM_001005766;                                                                                                                                                                                                                                                                                         |
| 93589  | CACNA2D4 (calcium channel, voltage-dependent, alpha 2/delta subunit 4  | -0.48 | AACAGCTAAGGTTTACATGTA  | NM_172364: | NM_172364; NM_001005747; NM_001005766;                                                                                                                                                                                                                                                                                         |
| 782    | CACNB1 calcium channel, voltage-dependent, beta 1 subunit              | -2.46 | CACGCTGCTGCTGCGTGAA    | NM_000723: | NM_000723;                                                                                                                                                                                                                                                                                                                     |
| 782    | CACNB1 calcium channel, voltage-dependent, beta 1 subunit              | -2.87 | CCCGAGGAAAGTCTCAGCTCA  | NM_000723: | NM_000723; NM_199247; NM_199248; NM_000723;                                                                                                                                                                                                                                                                                    |
| 783    | CACNB2 calcium channel, voltage-dependent, beta 2 subunit              | -0.89 | CACCTCCTTATATATATAAT   | NM_000724: | NM_201572; NM_201593; NM_201571; NM_201596; NM_201590; NM_000724;                                                                                                                                                                                                                                                              |
| 783    | CACNB2 calcium channel, voltage-dependent, beta 2 subunit              | 0.37  | CTCGAGGGAATCTCAAGCTA   | NM_000724: | NM_201572; NM_201593; NM_201571; NM_201596;                                                                                                                                                                                                                                                                                    |
| 784    | CACNB3 calcium channel, voltage-dependent, beta 3 subunit              | -1.11 | CTCACTGTCATCACTAATAAA  | NM_000725: | NM_201597; NM_201590; NM_201570; NM_000724;                                                                                                                                                                                                                                                                                    |
| 784    | CACNB3 calcium channel, voltage-dependent, beta 3 subunit              | -0.68 | CCGCTGTTAGTTAGGTTA     | NM_000725: | NM_000725;                                                                                                                                                                                                                                                                                                                     |
| 785    | CACNB4 calcium channel, voltage-dependent, beta 4 subunit              | 1.00  | TCCAGTTGGAACCAATTTAA   | NM_000726: | NM_000726; NM_001005747; NM_000726; NM_001005746;                                                                                                                                                                                                                                                                              |
| 785    | CACNB4 calcium channel, voltage-dependent, beta 4 subunit              | 0.79  | CTGGTTCAGAGCTCAGCGAA   | NM_000726: | NM_001005747; NM_000726; NM_001005746;                                                                                                                                                                                                                                                                                         |
| 786    | CACNG1 calcium channel, voltage-dependent, gamma subunit 1             | 0.16  | CACCGTCTGAGTCTGAGTACTA | NM_000727: | NM_000727;                                                                                                                                                                                                                                                                                                                     |
| 786    | CACNG1 calcium channel, voltage-dependent, gamma subunit 1             | -0.94 | CCGCGTGACCCCTCTCTGCAT  | NM_000727: | NM_000727;                                                                                                                                                                                                                                                                                                                     |

|        |         |                                                                           |       |                        |            |                                                                                            |
|--------|---------|---------------------------------------------------------------------------|-------|------------------------|------------|--------------------------------------------------------------------------------------------|
| 10369  | CACNG2  | calcium channel, voltage-dependent, gamma subunit 2                       | -0.40 | TCGGTTGGGTGTTTATATAAT  | NM_006078: | NM_006078:                                                                                 |
| 10369  | CACNG2  | calcium channel, voltage-dependent, gamma subunit 2                       | 0.28  | ATCCATTATATTAGTAGTGGA  | NM_006078: | NM_006078:                                                                                 |
| 10368  | CACNG3  | calcium channel, voltage-dependent, gamma subunit 3                       | -1.47 | C0GGAAGCAGCTAATGTAATAA | NM_006539: | NM_006539:                                                                                 |
| 10368  | CACNG3  | calcium channel, voltage-dependent, gamma subunit 3                       | -0.49 | CCCGAAGCAGCTAATGTAATAA | NM_006539: | NM_006539:                                                                                 |
| 27092  | CACNG4  | calcium channel, voltage-dependent, gamma subunit 4                       | -0.39 | CCCTGTGTGTTCCGCCAGTTA  | NM_014405: | NM_014405:                                                                                 |
| 27092  | CACNG4  | calcium channel, voltage-dependent, gamma subunit 4                       | 0.00  | CAGGAGAGCAACTACCTTCA   | NM_014405: | NM_014405:                                                                                 |
| 27091  | CACNG5  | calcium channel, voltage-dependent, gamma subunit 5                       | 2.39  | CCAGAAATGTGCACTGCTCTTA | NM_014404: | NM_014404:                                                                                 |
| 27091  | CACNG5  | calcium channel, voltage-dependent, gamma subunit 5                       | 0.22  | AGAGACCTACTTCAACTACAA  | NM_014404: | NM_014404:NM_145811:                                                                       |
| 59285  | CACNG6  | (cal) calcium channel, voltage-dependent, gamma subunit 6                 | 1.09  | TTGGGATTAAAGGTTTGGAAA  | NM_145814: | NM_031897:NM_145815:NM_145814:                                                             |
| 59285  | CACNG6  | (cal) calcium channel, voltage-dependent, gamma subunit 6                 | 0.53  | CTGGGTGGAGGCTCAACACCTA | NM_145814: | NM_031897:NM_145815:NM_145814:                                                             |
| 59284  | CACNG7  | (cal) calcium channel, voltage-dependent, gamma subunit 7                 | -2.22 | CACGGCCTTCGTATCAGCAA   | NM_031896: | NM_031896:                                                                                 |
| 59284  | CACNG7  | (cal) calcium channel, voltage-dependent, gamma subunit 7                 | -0.53 | ACGGAGAATATTCTGGAAGCAA | NM_031896: | NM_031896:                                                                                 |
| 59283  | CACNG8  | (cal) calcium channel, voltage-dependent, gamma subunit 8                 | -5.03 | CACCAACACGCTCAACAGGAA  | NM_031895: | NM_031895:                                                                                 |
| 59283  | CACNG8  | (cal) calcium channel, voltage-dependent, gamma subunit 8                 | -0.62 | CTGCGTGAAGATCAATCATTT  | NM_031895: | NM_031895:                                                                                 |
| 790    | CAD     | (carbam carbamoyl-phosphate synthetase 2, aspartate transcarbamylase, and | -0.51 | GAGGAGATCCTGCTAATTTAA  | NM_004341: | NM_004341:                                                                                 |
| 790    | CAD     | (carbam carbamoyl-phosphate synthetase 2, aspartate transcarbamylase, and | 4.02  | CCGGGATTGATTGATGTCCTAT | NM_004341: | NM_004341:                                                                                 |
| 796    | CALCA   | calcitonin/calcitonin-related polypeptide, alpha                          | 0.03  | CTGAATGTGCTGATGATTTGA  | NM_001741: | NM_001741:NM_001033952:                                                                    |
| 796    | CALCA   | calcitonin/calcitonin-related polypeptide, alpha                          | -2.58 | CAGAGGATGTCTCAAACCTCA  | NM_001741: | NM_001741:NM_001033952:                                                                    |
| 797    | CALCB   | calcitonin-related polypeptide, beta                                      | -1.89 | AACCTTGGTGATGCTATAGAA  | NM_000728: | NM_000728:                                                                                 |
| 799    | CALCR   | calcitonin receptor                                                       | -0.38 | AAGCATTCTTTACGCTGTA    | NM_001742: | NM_001742:                                                                                 |
| 799    | CALCR   | calcitonin receptor                                                       | -0.21 | TTGGGATACTAAAGTAGTTTA  | NM_001742: | NM_001742:                                                                                 |
| 10203  | CALCRL  | calcitonin receptor-like                                                  | -0.01 | AAGGCGTTTACTGCAACAGAA  | NM_005795: | NM_005795:                                                                                 |
| 10203  | CALCRL  | calcitonin receptor-like                                                  | 0.37  | CTCCTGCTTAGGACCATCAA   | NM_005795: | NM_005795:                                                                                 |
| 801    | CALM1   | calmodulin 1 (phosphorylase kinase, delta)                                | 1.26  | ATGCCCGTGATGTTGGTTTA   | NM_006888: | NM_006888:                                                                                 |
| 801    | CALM1   | calmodulin 1 (phosphorylase kinase, delta)                                | -0.80 | CGGCACTTACACACATGAA    | NM_006888: | NM_006888:                                                                                 |
| 805    | CALM2   | calmodulin 2 (phosphorylase kinase, delta)                                | 1.53  | ACAAGGAATTGGGAAGCTGTA  | NM_001743: | NM_001743:                                                                                 |
| 805    | CALM2   | calmodulin 2 (phosphorylase kinase, delta)                                | 0.77  | CAAGGAATTGGGAAGCTGTA   | NM_001743: | NM_001743:                                                                                 |
| 808    | CALM3   | calmodulin 3 (phosphorylase kinase, delta)                                | 0.44  | CACCAATTGATTGACTGAGAA  | NM_005184: | NM_005184:                                                                                 |
| 808    | CALM3   | calmodulin 3 (phosphorylase kinase, delta)                                | -0.51 | CCGCAGAGCTGGCTCAGTAA   | NM_005184: | NM_005184:                                                                                 |
| 811    | CALR    | calreticulin                                                              | -0.09 | CAGTATCTATGCCTATGATA   | NM_004343: | NM_004343:                                                                                 |
| 811    | CALR    | calreticulin                                                              | -1.88 | TTGGCTCACACTGAGAATGTA  | NM_004343: | NM_004343:                                                                                 |
| 8536   | CAMK1   | calcium/calmodulin-dependent protein kinase I                             | 0.14  | CAGGTGCTGGATGCTGTGAAA  | NM_003656: | NM_003656:                                                                                 |
| 8536   | CAMK1   | calcium/calmodulin-dependent protein kinase I                             | -1.31 | CTGCATGACCTGGGATTGTA   | NM_003656: | NM_003656:                                                                                 |
| 57118  | CAMK1D  | calcium/calmodulin-dependent protein kinase ID                            | -0.90 | CAGGCGCTTCTACTACTTAA   | NM_020397: | NM_020397:                                                                                 |
| 57118  | CAMK1D  | calcium/calmodulin-dependent protein kinase ID                            | 0.11  | CCAGGCGCTTCTACTACTTAA  | NM_020397: | NM_020397:                                                                                 |
| 57172  | CAMK1G  | calcium/calmodulin-dependent protein kinase IG                            | 0.82  | AACAGGCGGCTGAAACTCAA   | NM_020439: | NM_020439:                                                                                 |
| 57172  | CAMK1G  | calcium/calmodulin-dependent protein kinase IG                            | -5.93 | CAGGTCTGTGCGGAGTGA     | NM_020439: | NM_020439:                                                                                 |
| 815    | CAMK2A  | calcium/calmodulin-dependent protein kinase (CaM kinase) II alpha         | 2.41  | CAGGAACCTCTCCGGAGGGAA  | NM_015981: | NM_015981:NM_171825:                                                                       |
| 815    | CAMK2A  | calcium/calmodulin-dependent protein kinase (CaM kinase) II alpha         | 2.71  | CCAGGATTTCACTCACCATTA  | NM_015981: | NM_015981:NM_171825:                                                                       |
| 816    | CAMK2B  | calcium/calmodulin-dependent protein kinase (CaM kinase) II beta          | 2.00  | CAAGAGTTTACTCAACAAGAA  | NM_001220: | NM_172080:NM_001220:NM_172082:NM_172083:NM_172079:NM_172078:NM_172081:                     |
| 816    | CAMK2B  | calcium/calmodulin-dependent protein kinase (CaM kinase) II beta          | -0.69 | CCGGAAGCAGGAGATCATTAA  | NM_001220: | NM_172080:NM_001220:NM_172082:NM_172083:NM_172079:NM_172084:NM_172078:NM_172081:           |
| 817    | CAMK2D  | calcium/calmodulin-dependent protein kinase (CaM kinase) II delta         | 0.47  | CCGCCTGCATAGCATATATTA  | NM_001221: | NM_172115:NM_172128:NM_001221:NM_172127:                                                   |
| 817    | CAMK2D  | calcium/calmodulin-dependent protein kinase (CaM kinase) II delta         | -1.76 | GTGCGACTTCATGATAGCATA  | NM_001221: | NM_172115:NM_172128:NM_001221:NM_172127:                                                   |
| 818    | CAMK2G  | calcium/calmodulin-dependent protein kinase (CaM kinase) II gamma         | -0.14 | CCGATGAGAAACCTCGTGTTA  | NM_001222: | NM_172169:NM_172171:NM_172173:NM_172172:NM_172170:NM_001222:                               |
| 818    | CAMK2G  | calcium/calmodulin-dependent protein kinase (CaM kinase) II gamma         | 1.60  | GAGGAAGAGACTTATACCCCTA | NM_001222: | NM_172169:NM_172171:NM_172173:NM_172172:NM_172170:NM_001222:                               |
| 55450  | CAMK2N1 | calcium/calmodulin-dependent protein kinase II inhibitor 1                | 0.73  | AGCAAGCGGGTTGTTATTGAA  | NM_018584: | NM_018584:                                                                                 |
| 55450  | CAMK2N1 | calcium/calmodulin-dependent protein kinase II inhibitor 1                | 0.45  | CGGGTTGTTATTGGAAGATGAT | NM_018584: | NM_018584:                                                                                 |
| 814    | CAMK4   | calcium/calmodulin-dependent protein kinase IV                            | 0.90  | CAGAAGCCTTATGCTCTCAAA  | NM_001744: | NM_001744:                                                                                 |
| 814    | CAMK4   | calcium/calmodulin-dependent protein kinase IV                            | 1.64  | TTGCAAGTTAACACAACGTTAA | NM_001744: | NM_001744:                                                                                 |
| 84254  | CAMKK1  | calcium/calmodulin-dependent protein kinase kinase 1, alpha               | 0.49  | AGCGATGGCAAACTCTATAA   | NM_032294: | NM_172206:NM_032294:                                                                       |
| 84254  | CAMKK1  | calcium/calmodulin-dependent protein kinase kinase 1, alpha               | 0.77  | CGGGCTTATCTGGAAGTGGA   | NM_032294: | NM_172206:NM_032294:                                                                       |
| 10645  | CAMKK2  | calcium/calmodulin-dependent protein kinase kinase 2, beta                | -0.60 | CCGCAAGATCTCTCTGGGAA   | NM_006549: | NM_172226:NM_006549:NM_172215:NM_153500:NM_153499:NM_172216:NM_172214:                     |
| 10645  | CAMKK2  | calcium/calmodulin-dependent protein kinase kinase 2, beta                | 0.64  | CTAGCTGATTGTTGGTGCTAA  | NM_006549: | NM_172226:NM_006549:NM_172215:NM_153500:NM_153499:NM_172216:NM_172214:                     |
| 79012  | CAMKV   | CaM kinase-like vesicle-associated                                        | -2.26 | CTGCATGGCAATAACTCATAA  | NM_024046: | NM_024046:                                                                                 |
| 79012  | CAMKV   | CaM kinase-like vesicle-associated                                        | -3.32 | AAGGTAGGCGAGTATGTTTAA  | NM_024046: | NM_024046:                                                                                 |
| 819    | CAMLG   | calcium modulating ligand                                                 | -0.71 | ATGCATCAATGGACTCATATA  | NM_001745: | NM_001745:                                                                                 |
| 819    | CAMLG   | calcium modulating ligand                                                 | 1.19  | AGGGCTGAGTTGTATTATTA   | NM_001745: | NM_001745:                                                                                 |
| 821    | CANX    | calnexin                                                                  | 0.03  | ACACTAGCTGTGTAACCTTA   | NM_001746: | NM_001024649:NM_001746:                                                                    |
| 821    | CANX    | calnexin                                                                  | -0.02 | CCTGCATAATGTTAAGCTTTA  | NM_001746: | NM_001024649:NM_001746:                                                                    |
| 10487  | CAP1    | CAP, adenylate cyclase-associated protein 1 (yeast)                       | 1.27  | ATGGTTCTTCAACCAAACTA   | NM_006367: | NM_006367:                                                                                 |
| 10487  | CAP1    | CAP, adenylate cyclase-associated protein 1 (yeast)                       | 1.04  | CAACACGACATTTGCAAACTAA | NM_006367: | NM_006367:                                                                                 |
| 823    | CAPN1   | calpain 1, (mu/I) large subunit                                           | -1.53 | CAGGGACTGTGTACTGGTTA   | NM_005186: | NM_005186:                                                                                 |
| 823    | CAPN1   | calpain 1, (mu/I) large subunit                                           | -0.05 | CCGGACCATCCGCAAAATGGAA | NM_005186: | NM_005186:                                                                                 |
| 11132  | CAPN10  | (cal) calpain 10                                                          | 0.96  | CAGATCTTCTTATAACTATT   | NM_023083: | NM_021251:NM_023087:NM_023088:NM_023085:NM_023086:NM_023083:NM_023084:                     |
| 11132  | CAPN10  | (cal) calpain 10                                                          | -5.71 | CTCCGTCATGGCAGTGATGAA  | NM_023083: | NM_021251:NM_023087:NM_023088:NM_023085:NM_023086:NM_023083:NM_023084:                     |
| 11131  | CAPN11  | calpain 11                                                                | -2.53 | ATGCGCTGGTATTGAGAAA    | NM_007058: | NM_007058:                                                                                 |
| 11131  | CAPN11  | calpain 11                                                                | -1.15 | CACATCTTTCTAACCATGGA   | NM_007058: | NM_007058:                                                                                 |
| 147968 | CAPN12  | calpain 12                                                                | 0.14  | CAGGGCAGGGTGTGAGCAA    | NM_144691: | NM_144691:                                                                                 |
| 147968 | CAPN12  | calpain 12                                                                | -0.35 | CAAAACATCAATTAATATTA   | NM_144691: | NM_144691:                                                                                 |
| 92291  | CAPN13  | calpain 13                                                                | -1.40 | CAGTATGGTGTGTGATAAA    | NM_144575: | NM_144575:                                                                                 |
| 92291  | CAPN13  | calpain 13                                                                | 1.09  | ACGAAGGATGGTCCCAATAA   | NM_144575: | NM_144575:                                                                                 |
| 824    | CAPN2   | calpain 2, (m/I) large subunit                                            | 0.25  | CCCGAGAATCTGGAAACAATA  | NM_001748: | NM_001748:                                                                                 |
| 824    | CAPN2   | calpain 2, (m/I) large subunit                                            | 0.29  | AACGGATGCTAGGAGCTCTA   | NM_001748: | NM_001748:                                                                                 |
| 825    | CAPN3   | calpain 3, (p94)                                                          | 0.63  | ACACATGAACATCGACTTTGA  | NM_000070: | NM_173090:NM_212465:NM_212464:NM_024344:NM_000070:NM_212467:NM_173088:NM_173089:NM_173087: |
| 825    | CAPN3   | calpain 3, (p94)                                                          | 0.00  | CCGGACAATCAATCCGGTTCA  | NM_000070: | NM_212465:NM_212464:NM_024344:NM_000070:NM_212467:                                         |
| 726    | CAPN5   | calpain 5                                                                 | -0.51 | CTGGTGTCTCCACCTTGGAA   | NM_004055: | NM_004055:                                                                                 |
| 726    | CAPN5   | calpain 5                                                                 | -4.72 | CCGGCTGATCAACACATCCCA  | NM_004055: | NM_004055:                                                                                 |
| 827    | CAPN6   | calpain 6                                                                 | -0.34 | AAGGGTGGTCCAATGCOAAA   | NM_014289: | NM_014289:                                                                                 |
| 827    | CAPN6   | calpain 6                                                                 | -2.06 | CAAGGTCAATATGCTCACTGCA | NM_014289: | NM_014289:                                                                                 |
| 23473  | CAPN7   | calpain 7                                                                 | -5.02 | CCGGCATAAATTTACCTCAAA  | NM_014296: | NM_014296:                                                                                 |
| 23473  | CAPN7   | calpain 7                                                                 | -2.26 | CAGGTGTTATGAAAGAATAAA  | NM_014296: | NM_014296:                                                                                 |
| 10753  | CAPN9   | calpain 9                                                                 | 0.29  | GAGAACTCTATGAGATTCTA   | NM_006615: | NM_016452:NM_006615:                                                                       |
| 10753  | CAPN9   | calpain 9                                                                 | -1.92 | GAGGAGTGTAGTTTCCCTGTA  | NM_006615: | NM_016452:NM_006615:                                                                       |
| 826    | CAPNS1  | calpain, small subunit 1                                                  | 0.01  | CACCTGAATGAGCATCTCTAT  | NM_001749: | NM_001003962:NM_001749:                                                                    |
| 826    | CAPNS1  | calpain, small subunit 1                                                  | -0.52 | AAGGTGGCAGGCCATATACAA  | NM_001749: | NM_001003962:NM_001749:                                                                    |

|        |             |                                                                         |       |                        |              |                                                    |
|--------|-------------|-------------------------------------------------------------------------|-------|------------------------|--------------|----------------------------------------------------|
| 84433  | CARD11      | caspase recruitment domain family, member 11                            | 0.59  | CAACTCGAGATCGATCAGCTA  | NM_032415:   | NM_032415:                                         |
| 84433  | CARD11      | caspase recruitment domain family, member 11                            | 2.06  | CACAGTACTCGCGAGTGCTTAA | NM_032415:   | NM_032415:                                         |
| 79092  | CARD14      | caspase recruitment domain family, member 14                            | -5.92 | CACCTGGATTATGAGCTCCTA  | NM_024110:   | NM_024110:NM_052819:                               |
| 79092  | CARD14      | caspase recruitment domain family, member 14                            | -1.66 | CGCATCGTCAGTATGGACAA   | NM_024110:   | NM_024110:                                         |
| 64127  | CARD15      | caspase recruitment domain family, member 15                            | 0.58  | CAGTTATGGATTGAAAGTTTA  | NM_022162:   | NM_022162:                                         |
| 64127  | CARD15      | caspase recruitment domain family, member 15                            | -7.15 | TAGGCCGTTCTTCAAAGCAA   | NM_022162:   | NM_022162:                                         |
| 10392  | CARD4       | caspase recruitment domain family, member 4                             | -0.95 | CAGCCTGACAAGGTCGGCAA   | NM_006092:   | NM_006092:                                         |
| 10392  | CARD4       | caspase recruitment domain family, member 4                             | 1.29  | GCCTGCTCATTTGTTAATAAA  | NM_006092:   | NM_006092:                                         |
| 84674  | CARD6       | caspase recruitment domain family, member 6                             | -0.47 | AACCTTCCATGCAAAATCTA   | NM_032587:   | NM_032587:                                         |
| 84674  | CARD6       | caspase recruitment domain family, member 6                             | 0.43  | CCCAATTTGCTGAATGGGAA   | NM_032587:   | NM_032587:                                         |
| 22900  | CARD8       | caspase recruitment domain family, member 8                             | 0.04  | CCCTGATATTCTACTTATTTA  | NM_014959:   | NM_014959:                                         |
| 22900  | CARD8       | caspase recruitment domain family, member 8                             | -0.14 | CCGGATAGGTGTTTATGAA    | NM_014959:   | NM_014959:                                         |
| 64170  | CARD9       | caspase recruitment domain family, member 9                             | -6.76 | ACGTAAGGACTCAAGATGTA   | NM_052813.1: | NM_052813:                                         |
| 64170  | CARD9       | caspase recruitment domain family, member 9                             | -0.27 | CCGCGTCTTCCATGATCAT    | NM_052813.1: | NM_052813:                                         |
| 23729  | CARKL (carb | coactivator-associated arginine methyltransferase 1                     | 1.34  | ATGAAACATATTGCTCTTTA   | NM_013276:   | NM_013276:                                         |
| 23729  | CARKL (carb | coactivator-associated arginine methyltransferase 1                     | 0.74  | CAGGTAGTTTATCAAAGAGA   | NM_013276:   | NM_013276:                                         |
| 10498  | CARM1       | coactivator-associated arginine methyltransferase 1                     | 1.49  | CACAACAACCTGATTCCTTTA  | NM_199141:   | NM_199141:                                         |
| 10498  | CARM1       | coactivator-associated arginine methyltransferase 1                     | -2.52 | CAGGATAGAAATCCCATTCAA  | NM_199141:   | NM_199141:                                         |
| 833    | CARS        | cysteinyl-tRNA synthetase                                               | -4.61 | AAGGAAGTGTTCATACCTCAA  | NM_001751:   | NM_001751:NM_001014437:NM_001014438:NM_139273:     |
| 833    | CARS        | cysteinyl-tRNA synthetase                                               | -3.49 | CACCTTGGGTCATAAATTA    | NM_001751:   | NM_001751:NM_001014437:NM_001014438:NM_139273:     |
| 8573   | CASK        | calcium/calmodulin-dependent serine protein kinase (MAGUK family)       | 0.50  | AACCAATGGGAATCACTTTAA  | NM_003688:   | NM_003688:                                         |
| 8573   | CASK        | calcium/calmodulin-dependent serine protein kinase (MAGUK family)       | -1.29 | AAGGACGACAGATCTATGTA   | NM_003688:   | NM_003688:                                         |
| 834    | CASP1       | caspase 1, apoptosis-related cysteine peptidase (interleukin 1, beta, c | -0.09 | CCCAGATATACTACAACCTCAA | NM_001223:   | NM_001223:NM_033294:NM_033292:NM_033293:           |
| 834    | CASP1       | caspase 1, apoptosis-related cysteine peptidase (interleukin 1, beta, c | -1.37 | CTCATTGAACATATGCAAGAA  | NM_001223:   | NM_001223:NM_033294:NM_033292:NM_033295:NM_033293: |
| 843    | CASP10      | caspase 10, apoptosis-related cysteine peptidase                        | 0.95  | AAGGGTTTCTCTGTTTAGAAA  | NM_001230:   | NM_032977:NM_032974:NM_032976:NM_001230:           |
| 843    | CASP10      | caspase 10, apoptosis-related cysteine peptidase                        | 0.53  | CACAGTGCATATACACAATA   | NM_001230:   | NM_032977:NM_032974:NM_032976:NM_001230:           |
| 23581  | CASP14      | caspase 14, apoptosis-related cysteine peptidase                        | -7.24 | CACAGATGCGTTCGACGTTTA  | NM_012114:   | NM_012114:                                         |
| 23581  | CASP14      | caspase 14, apoptosis-related cysteine peptidase                        | -4.15 | GAGGAGAAATATGATATGCTA  | NM_012114:   | NM_012114:                                         |
| 835    | CASP2       | caspase 2, apoptosis-related cysteine peptidase (neural precursor cell  | -3.23 | CAGGATCATGTAATGCTCAA   | NM_001224:   | NM_032983:NM_001224:NM_032982:                     |
| 835    | CASP2       | caspase 2, apoptosis-related cysteine peptidase (neural precursor cell  | 1.27  | CAGGATTTGGTGTTTAAATA   | NM_001224:   | NM_032983:NM_001224:NM_032982:                     |
| 836    | CASP3       | caspase 3, apoptosis-related cysteine peptidase                         | 1.63  | ACAGCATGTAATGGTATCTTA  | NM_004346:   | NM_004346:NM_032991:                               |
| 836    | CASP3       | caspase 3, apoptosis-related cysteine peptidase                         | -0.05 | CAGCATGTAATGGTATCTTAA  | NM_004346:   | NM_004346:NM_032991:                               |
| 837    | CASP4       | caspase 4, apoptosis-related cysteine peptidase                         | 1.50  | AAGAATATACGATGCTAAA    | NM_001225:   | NM_03306:NM_001225:NM_03307:                       |
| 837    | CASP4       | caspase 4, apoptosis-related cysteine peptidase                         | -0.49 | CTGGACTATAGTGTAGATGTA  | NM_001225:   | NM_03306:NM_001225:NM_03307:                       |
| 838    | CASP5       | caspase 5, apoptosis-related cysteine peptidase                         | -1.78 | AAGAATCGGGTGGCTCATCAA  | NM_004347:   | NM_004347:                                         |
| 838    | CASP5       | caspase 5, apoptosis-related cysteine peptidase                         | 1.15  | TTCGTGTAACACATGCTA     | NM_004347:   | NM_004347:                                         |
| 839    | CASP6       | caspase 6, apoptosis-related cysteine peptidase                         | 0.79  | CAGGAATTAATCATCCCTTA   | NM_001226:   | NM_001226:NM_032992:                               |
| 839    | CASP6       | caspase 6, apoptosis-related cysteine peptidase                         | 0.97  | CTCAGGAATATGATAAATA    | NM_001226:   | NM_001226:NM_032992:                               |
| 840    | CASP7       | caspase 7, apoptosis-related cysteine peptidase                         | -1.97 | AAGCAATGGGTCACCTATTA   | NM_001227:   | NM_033338:NM_001227:NM_033339:NM_033340:           |
| 840    | CASP7       | caspase 7, apoptosis-related cysteine peptidase                         | 0.60  | ATGCATCATAATAAACACAA   | NM_001227:   | NM_033338:NM_001227:NM_033339:NM_033340:           |
| 841    | CASP8       | caspase 8, apoptosis-related cysteine peptidase                         | 0.01  | AAGAGTCTGTGCCCAAATCAA  | NM_001228:   | NM_033357:NM_033355:NM_001228:NM_033356:NM_033358: |
| 841    | CASP8       | caspase 8, apoptosis-related cysteine peptidase                         | 0.31  | AAGATAATCAACGACTATGAA  | NM_001228:   | NM_033357:NM_033355:NM_001228:NM_033356:NM_033358: |
| 9994   | CASP8AP2    | CASP8 associated protein 2                                              | -0.06 | AACGAAGTTTCGAGATTCTTA  | NM_012115:   | NM_012115:                                         |
| 9994   | CASP8AP2    | CASP8 associated protein 2                                              | -3.52 | CAGTCTGATCTCAATAAGGAA  | NM_012115:   | NM_012115:                                         |
| 842    | CASP9       | caspase 9, apoptosis-related cysteine peptidase                         | -2.13 | CAGCAAAGTTGTCGAAAGCCAA | NM_001229:   | NM_001229:NM_032996:                               |
| 842    | CASP9       | caspase 9, apoptosis-related cysteine peptidase                         | -1.82 | CAGGATTAACCTCTGCACCTA  | NM_001229:   | NM_001229:NM_032996:                               |
| 845    | CASQ2       | calsequestrin 2 (cardiac muscle)                                        | 1.88  | TAGTTTAAAGTGTGAGATATA  | NM_001232:   | NM_001232:                                         |
| 845    | CASQ2       | calsequestrin 2 (cardiac muscle)                                        | -2.41 | TAGCCTAAGCTGGGATCTGAA  | NM_001232:   | NM_001232:                                         |
| 846    | CASR        | calcium-sensing receptor (hypocalciuric hypercalcemia 1, severe neon    | -0.16 | CACGCATTTACGGATATCTCTA | NM_000388:   | NM_000388:                                         |
| 846    | CASR        | calcium-sensing receptor (hypocalciuric hypercalcemia 1, severe neon    | -1.77 | CCGGCGCAATATCACGGGCAA  | NM_000388:   | NM_000388:                                         |
| 344760 | CASRL1      | calcium-sensing receptor like 1                                         | 0.64  | TAGCGGAGATTGGCATATGTA  | XM_293581:   | XM_293581:                                         |
| 344760 | CASRL1      | calcium-sensing receptor like 1                                         | 0.00  | AAGAGTCTCCACCACAGATAA  | XM_293581:   | XM_293581:                                         |
| 847    | CAT         | catalase                                                                | 0.76  | CTGGAGTTACATTAATGTTAA  | NM_001752:   | NM_001752:                                         |
| 847    | CAT         | catalase                                                                | 1.52  | ACCGCTATGGCTTAATGTTTA  | NM_001752:   | NM_001752:                                         |
| 117144 | CATSPER1    | cation channel, sperm associated 1                                      | -0.54 | CCAGTACTTCACTTCTCCAA   | NM_053054:   | NM_053054:                                         |
| 117144 | CATSPER1    | cation channel, sperm associated 1                                      | -3.24 | CCGGATCCTCAAGGCTTCAA   | NM_053054:   | NM_053054:                                         |
| 117155 | CATSPER2    | cation channel, sperm associated 2                                      | 1.20  | TCCGTCAAATCAAATTATTA   | NM_172096:   | NM_172097:NM_172095:NM_172096:NM_054020:           |
| 347732 | CATSPER3    | cation channel, sperm associated 3                                      | -0.77 | CCGTTCTTTAAGATAATTAT   | NM_178019:   | NM_178019:                                         |
| 347732 | CATSPER3    | cation channel, sperm associated 3                                      | 0.08  | GCCCAACATTCGAAGAAATTTA | NM_178019:   | NM_178019:                                         |
| 378807 | CATSPER4    | ( cation channel, sperm associated 4                                    | -6.03 | CCGAGATGAACCTCAACATGAT | XM_371237:   | NM_198137:                                         |
| 378807 | CATSPER4    | ( cation channel, sperm associated 4                                    | 0.31  | AACAGCAACGAATAACCTTTA  | XM_371237:   | NM_198137:                                         |
| 857    | CAV1        | caveolin 1, caveolae protein, 22kDa                                     | -0.79 | CAGCCGTGTCTATTCACATCA  | NM_001753:   | NM_001753:                                         |
| 857    | CAV1        | caveolin 1, caveolae protein, 22kDa                                     | -0.29 | CTGGTCAACCAGGACCCATAA  | NM_001753:   | NM_001753:                                         |
| 858    | CAV2        | caveolin 2                                                              | 0.02  | ACGCATAATCATTACCTTAA   | NM_001233:   | NM_001233:NM_198212:                               |
| 858    | CAV2        | caveolin 2                                                              | 1.49  | ACGCTAATAAGTGACAAATAA  | NM_001233:   | NM_001233:NM_198212:                               |
| 859    | CAV3        | caveolin 3                                                              | -0.01 | TCCTTGAAGATCATGTTTAA   | NM_001234:   | NM_033337:NM_001234:                               |
| 859    | CAV3        | caveolin 3                                                              | 1.11  | TAGGAAGGTGGCTCCAGTAAA  | NM_001234:   | NM_033337:NM_001234:                               |
| 865    | CBFB        | core-binding factor, beta subunit                                       | 0.94  | TACAAAGGTAATATTGATTA   | NM_001755:   | NM_001755:NM_022845:                               |
| 865    | CBFB        | core-binding factor, beta subunit                                       | -0.06 | CAACAATAATGCGCTATTAA   | NM_001755:   | NM_001755:NM_022845:                               |
| 867    | CBL         | Cas-Br-M (murine) ecotropic retroviral transforming sequence            | -0.26 | CCCGCGAACTCTCTCAGATA   | NM_005188:   | NM_005188:                                         |
| 867    | CBL         | Cas-Br-M (murine) ecotropic retroviral transforming sequence            | 0.77  | CCGTACTATCTGTCAAGATA   | NM_005188:   | NM_005188:                                         |
| 868    | CBLB        | Cas-Br-M (murine) ecotropic retroviral transforming sequence b          | 0.42  | CACAGCGAGTTCAAATGTCAA  | NM_170662:   | NM_170662:                                         |
| 868    | CBLB        | Cas-Br-M (murine) ecotropic retroviral transforming sequence b          | -0.28 | TCGGTTGGCAAACCTCGGAAA  | NM_170662:   | NM_170662:                                         |
| 23624  | CBLC        | Cas-Br-M (murine) ecotropic retroviral transforming sequence c          | -1.54 | CAGCCGAAAGTGAGACTCCTA  | NM_012116:   | NM_012116:                                         |
| 23624  | CBLC        | Cas-Br-M (murine) ecotropic retroviral transforming sequence c          | 0.10  | CTGGGAGGCCGTGAGTATCTA  | NM_012116:   | NM_012116:                                         |
| 79872  | CBLL1       | Cas-Br-M (murine) ecotropic retroviral transforming sequence-like 1     | 0.06  | ACCATTAATCCTAACTCAT    | NM_024814:   | NM_024814:                                         |
| 79872  | CBLL1       | Cas-Br-M (murine) ecotropic retroviral transforming sequence-like 1     | -2.79 | CCGCCTCAACATGGTGGTCCA  | NM_024814:   | NM_024814:                                         |
| 873    | CBR1        | carbonyl reductase 1                                                    | 0.78  | CGCACTCAGTTGACTACGTAA  | NM_001757:   | NM_001757:                                         |
| 873    | CBR1        | carbonyl reductase 1                                                    | 0.86  | CACATAATGACTACTAATTGA  | NM_001757:   | NM_001757:                                         |
| 874    | CBR3        | carbonyl reductase 3                                                    | 0.21  | CGGAGCTTGGCTCTAATAAA   | NM_001236:   | NM_001236:                                         |
| 874    | CBR3        | carbonyl reductase 3                                                    | -1.48 | AAGACAGACATGGATGGGAAA  | NM_001236:   | NM_001236:                                         |
| 84869  | CBR4        | carbonic reductase 4                                                    | -0.61 | AAGACTACGCTGCATTTCAA   | NM_032783:   | NM_032783:                                         |
| 84869  | CBR4        | carbonic reductase 4                                                    | 0.94  | CCTAGTAGAATTTGTAATTTA  | NM_032783:   | NM_032783:                                         |
| 875    | CBS         | cystathionine-beta-synthase                                             | -1.48 | CGCAGAGTGGATTAAGGCCAA  | NM_000071:   | NM_000071:                                         |
| 875    | CBS         | cystathionine-beta-synthase                                             | 0.09  | TAGGATGAACACAGGCAATGA  | NM_000071:   | NM_000071:                                         |
| 11335  | CBX3        | chromobox homolog 3 (HP1 gamma homolog, Drosophila)                     | 0.01  | CTGGTTACTTTGACAAATAA   | NM_007276:   | NM_007276:NM_016587:                               |
| 11335  | CBX3        | chromobox homolog 3 (HP1 gamma homolog, Drosophila)                     | 0.79  | TCCCTTCAAGTTAAATTGAAA  | NM_007276:   | NM_007276:NM_016587:                               |
| 8535   | CBX4        | chromobox homolog 4 (Pc class homolog, Drosophila)                      | 0.18  | AAGCCCTCTTTGGGAATATA   | NM_003655:   | NM_003655:                                         |

|       |                                           |                                                                      |       |                        |            |                                |
|-------|-------------------------------------------|----------------------------------------------------------------------|-------|------------------------|------------|--------------------------------|
| 8535  | CBX4                                      | chromobox homolog 4 (Pc class homolog, Drosophila)                   | 0.99  | GAGGCTGGTCGCCAAATATA   | NM_003655: | NM_003655:                     |
| 1238  | CCBP2                                     | chemokine binding protein 2                                          | -0.15 | CTCAGTGACTGTGGTCTAAA   | NM_001296: | NM_001296:                     |
| 1238  | CCBP2                                     | chemokine binding protein 2                                          | 0.17  | CTGCATGAGCCTGGACAAGTA  | NM_001296: | NM_001296:                     |
| 64793 | CCDC21                                    | coiled-coil domain containing 21                                     | -0.05 | CGACGGTGAGTTACTAATTA   | NM_022778: | NM_022778:                     |
| 64793 | CCDC21                                    | coiled-coil domain containing 21                                     | -6.58 | TAGCATGGAATCTACCCCTCAA | NM_022778: | NM_022778:                     |
| 25901 | CCDC28A                                   | coiled-coil domain containing 28A                                    | 1.33  | CCGAGATTACAGCTAAAGGAA  | NM_015439: | NM_015439:                     |
| 25901 | CCDC28A                                   | coiled-coil domain containing 28A                                    | -0.02 | TCGCTTGAATTTGGAGCTCTA  | NM_015439: | NM_015439:                     |
| 885   | CKK                                       | cholecystokinin                                                      | 0.06  | ACGAATGCCATCGTTAAGAA   | NM_000729: | NM_000729:                     |
| 885   | CKK                                       | cholecystokinin                                                      | 0.62  | ACCAGAATTGCGAAATGGAA   | NM_000729: | NM_000729:                     |
| 886   | CKKAR                                     | cholecystokinin A receptor                                           | -0.11 | AAGGGTGATCGCATGCTCAT   | NM_000730: | NM_000730:                     |
| 886   | CKKAR                                     | cholecystokinin A receptor                                           | -3.19 | CAGAAGAAGCTCTGTAAGAA   | NM_000730: | NM_000730:                     |
| 887   | CKKBR                                     | cholecystokinin B receptor                                           | -0.51 | CCCGTGACACTGCTGCGCAA   | NM_176875: | NM_176875:                     |
| 887   | CKKBR                                     | cholecystokinin B receptor                                           | 0.40  | CCGCCGGTGGAGCTGAGTAA   | NM_176875: | NM_176875:                     |
| 6346  | CCL1                                      | chemokine (C-C motif) ligand 1                                       | 0.67  | AACATTTAAATATACAATCA   | NM_002981: | NM_002981:                     |
| 6346  | CCL1                                      | chemokine (C-C motif) ligand 1                                       | 0.96  | AAGCTATGTTGTGCACCTTA   | NM_002981: | NM_002981:                     |
| 6356  | CCL11                                     | chemokine (C-C motif) ligand 11                                      | -0.55 | AACCAAGGTGACTCATTA     | NM_002986: | NM_002986:                     |
| 6356  | CCL11                                     | chemokine (C-C motif) ligand 11                                      | 0.98  | AAGCTTTGTGCAGATCTTTA   | NM_002986: | NM_002986:                     |
| 6357  | CCL13                                     | chemokine (C-C motif) ligand 13                                      | 1.19  | TGGTCCAGAAATATATGAAA   | NM_005408: | NM_005408:                     |
| 6357  | CCL13                                     | chemokine (C-C motif) ligand 13                                      | 1.08  | ACTCTAACCTCAACATGAA    | NM_005408: | NM_005408:                     |
| 6360  | CCL16                                     | chemokine (C-C motif) ligand 16                                      | -0.11 | AGCAATCATCTGTCACCAA    | NM_004590: | NM_004590:                     |
| 6360  | CCL16                                     | chemokine (C-C motif) ligand 16                                      | 0.06  | CAGGAACCTTGCCAGCGTTAA  | NM_004590: | NM_004590:                     |
| 6361  | CCL17                                     | chemokine (C-C motif) ligand 17                                      | 0.44  | AGAGTGAAGAATGCACTTAA   | NM_002987: | NM_002987:                     |
| 6361  | CCL17                                     | chemokine (C-C motif) ligand 17                                      | -2.06 | ATGCAGTTAAATCACTGCAAA  | NM_002987: | NM_002987:                     |
| 6362  | CCL18                                     | chemokine (C-C motif) ligand 18 (pulmonary and activation-regulated) | -0.14 | AACCAGCATCTCACTGTGAA   | NM_002988: | NM_002988:                     |
| 6362  | CCL18                                     | chemokine (C-C motif) ligand 18 (pulmonary and activation-regulated) | 0.10  | TTGGCAGTACTTATTATATA   | NM_002988: | NM_002988:                     |
| 6363  | CCL19                                     | chemokine (C-C motif) ligand 19                                      | 0.01  | AAGAACGCATATCCAGAGAC   | NM_006274: | NM_006274:                     |
| 6363  | CCL19                                     | chemokine (C-C motif) ligand 19                                      | -0.28 | AATCGTGAGGAATCCACCTA   | NM_006274: | NM_006274:                     |
| 6347  | CCL2                                      | chemokine (C-C motif) ligand 2                                       | 0.20  | CTGCTGTTATAACTTACCACC  | NM_002982: | NM_002982:                     |
| 6347  | CCL2                                      | chemokine (C-C motif) ligand 2                                       | -3.66 | ATGGACCACCTGGACAAGCAA  | NM_002982: | NM_002982:                     |
| 6364  | CCL20                                     | chemokine (C-C motif) ligand 20                                      | 0.70  | AAACATTAATAAGCAAAATAT  | NM_004591: | NM_004591:                     |
| 6364  | CCL20                                     | chemokine (C-C motif) ligand 20                                      | 1.37  | TTGTTGAATTCGATATATAA   | NM_004591: | NM_004591:                     |
| 6366  | CCL21                                     | chemokine (C-C motif) ligand 21                                      | 0.35  | TATGATTTATACCTAAGTAA   | NM_002989: | NM_002989:                     |
| 6366  | CCL21                                     | chemokine (C-C motif) ligand 21                                      | -3.49 | AAGCCTGAACCCAAAGTGCAA  | NM_002989: | NM_002989:                     |
| 6367  | CCL22                                     | chemokine (C-C motif) ligand 22                                      | 0.43  | CAGGTAAGGACATAAATGTT   | NM_002990: | NM_002990:                     |
| 6367  | CCL22                                     | chemokine (C-C motif) ligand 22                                      | 1.18  | TAAGCTGGAGTTATATATGTA  | NM_002990: | NM_002990:                     |
| 6368  | CCL23                                     | chemokine (C-C motif) ligand 23                                      | -0.53 | CTCCTGGAGGATTAATTTGAA  | NM_145898: | NM_005064:NM_145898:           |
| 6368  | CCL23                                     | chemokine (C-C motif) ligand 23                                      | -2.93 | CAGGAAGAATGAACITGTCA   | NM_145898: | NM_005064:NM_145898:           |
| 6369  | CCL24                                     | chemokine (C-C motif) ligand 24                                      | -0.33 | AGGAGTGATCTTCCACCACCA  | NM_002991: | NM_002991:                     |
| 6369  | CCL24                                     | chemokine (C-C motif) ligand 24                                      | -1.85 | CAGAGATATCCTGGCAACCAA  | NM_002991: | NM_002991:                     |
| 6370  | CCL25                                     | chemokine (C-C motif) ligand 25                                      | -0.06 | AAGAAGTTGAGTCTGGAACAA  | NM_005624: | NM_148888:NM_005624:           |
| 6370  | CCL25                                     | chemokine (C-C motif) ligand 25                                      | 0.43  | AATCTGCCTGCTGCGATATTC  | NM_005624: | NM_005624:                     |
| 10344 | CCL26                                     | chemokine (C-C motif) ligand 26                                      | -3.10 | CAGGCGCTCTCAGCTCTCATA  | NM_006072: | NM_006072:                     |
| 10344 | CCL26                                     | chemokine (C-C motif) ligand 26                                      | -0.45 | AAGCTATGAATTCACCAATAA  | NM_006072: | NM_006072:                     |
| 10850 | CCL27                                     | chemokine (C-C motif) ligand 27                                      | 0.55  | CAGCATTGGATAAATTTCT    | NM_006664: | NM_006664:                     |
| 10850 | CCL27                                     | chemokine (C-C motif) ligand 27                                      | -1.16 | TAGCCAAATAAATAAGCAGCA  | NM_006664: | NM_006664:                     |
| 56477 | CCL28                                     | chemokine (C-C motif) ligand 28                                      | 1.15  | TAAGATGTACATAGTACTCCA  | NM_019846: | NM_019846:                     |
| 56477 | CCL28                                     | chemokine (C-C motif) ligand 28                                      | 1.42  | TACGATATAGGCTTTATGTA   | NM_019846: | NM_019846:                     |
| 6348  | CCL3                                      | chemokine (C-C motif) ligand 3                                       | 0.28  | CAGAAATATGTCAGCGACCTA  | NM_002983: | NM_002983:                     |
| 6351  | CCL4                                      | chemokine (C-C motif) ligand 4                                       | -0.03 | CTGTCCCTCTCTTAATTTAA   | NM_002984: | NM_002984:                     |
| 6352  | CCL5                                      | chemokine (C-C motif) ligand 5                                       | 2.10  | AAAGTTCTCAATGCAACCCATA | NM_002985: | NM_002985:                     |
| 6352  | CCL5                                      | chemokine (C-C motif) ligand 5                                       | 1.49  | ACCATTAAAGTTCTCAATGCA  | NM_002985: | NM_002985:                     |
| 6354  | CCL7                                      | chemokine (C-C motif) ligand 7                                       | 0.21  | AAGATTTGCTTTAATGTTAA   | NM_006273: | NM_006273:                     |
| 6354  | CCL7                                      | chemokine (C-C motif) ligand 7                                       | 0.54  | TGGAAGCATATGTTATTTATA  | NM_006273: | NM_006273:                     |
| 6355  | CCL8                                      | chemokine (C-C motif) ligand 8                                       | 0.11  | ATCAGTGCTCCTGTAAGTCAA  | NM_005623: | NM_005623:                     |
| 6355  | CCL8                                      | chemokine (C-C motif) ligand 8                                       | -0.81 | CTCAACTAAGTTCACGGCAAA  | NM_005623: | NM_005623:                     |
| 8900  | CCNA1 (cyclin cyclin A1)                  |                                                                      | -0.43 | CACCGATGATACATACACAAA  | NM_003914: | NM_003914:                     |
| 8900  | CCNA1 (cyclin cyclin A1)                  |                                                                      | -0.04 | TTCGAAATGAAGAGATATA    | NM_003914: | NM_003914:                     |
| 890   | CCNA2 (cyclin A2)                         |                                                                      | -0.26 | ACCAGAGACACTAAATCTGTA  | NM_001237: | NM_001237:                     |
| 890   | CCNA2 (cyclin A2)                         |                                                                      | 0.89  | GCCAGCTGTGAGGATAATAAA  | NM_001237: | NM_001237:                     |
| 891   | CCNB1 (cyclin B1)                         |                                                                      | 0.20  | AACACTTAACTAAGCACCAA   | NM_031966: | NM_031966:                     |
| 891   | CCNB1 (cyclin B1)                         |                                                                      | 0.01  | AATGTAGTCAATGGTAATCAA  | NM_031966: | NM_031966:                     |
| 9133  | CCNB2 (cyclin B2)                         |                                                                      | -0.08 | ATGCTTATACCAAGTCCCAA   | NM_004701: | NM_004701:                     |
| 9133  | CCNB2 (cyclin B2)                         |                                                                      | 1.06  | CAAGAATGTGGTGAAGTAAA   | NM_004701: | NM_004701:                     |
| 85417 | CCNB3 (cyclin cyclin B3)                  |                                                                      | -4.93 | AAGGCTGTGATTAACAAGTAT  | NM_033031: | NM_033031:NM_033670:NM_033671: |
| 85417 | CCNB3 (cyclin cyclin B3)                  |                                                                      | 2.43  | AGGCTAAGCATGCATGTTAA   | NM_033031: | NM_033031:NM_033670:NM_033671: |
| 892   | CCNC (cyclin cyclin C)                    |                                                                      | -0.08 | CAAGTACCGTATATTGATTTA  | NM_005190: | NM_001013399:NM_005190:        |
| 892   | CCNC (cyclin cyclin C)                    |                                                                      | 1.59  | TCCGAAGAATTCATAGTGGA   | NM_005190: | NM_005190:NM_001013399:        |
| 595   | CCND1 (cyclin D1)                         |                                                                      | 0.95  | AAGGCCAGTATTGATTTATAA  | NM_053056: | NM_053056:                     |
| 595   | CCND1 (cyclin D1)                         |                                                                      | 1.96  | CTCCTACGATACGCTACTATA  | NM_053056: | NM_053056:                     |
| 894   | CCND2 (cyclin D2)                         |                                                                      | 0.03  | AAGAAATAGACTTGACCTTA   | NM_001759: | NM_001759:                     |
| 894   | CCND2 (cyclin D2)                         |                                                                      | -0.46 | TCCGAGTGCCTCTACTCTAA   | NM_001759: | NM_001759:                     |
| 896   | CCND3 (cyclin cyclin D3)                  |                                                                      | -2.33 | CAGGAACCCACCCACATCTAA  | NM_001760: | NM_001760:                     |
| 896   | CCND3 (cyclin cyclin D3)                  |                                                                      | 0.02  | GACCATCATCCTACTGTAATA  | NM_001760: | NM_001760:                     |
| 898   | CCNE1 (cyclin E1)                         |                                                                      | -0.03 | ACCGGGTTTTCCCAAACCTCAA | NM_001238: | NM_001238:NM_057182:           |
| 898   | CCNE1 (cyclin E1)                         |                                                                      | 0.03  | CACCATGGAATTAATGATTAT  | NM_001238: | NM_001238:NM_057182:           |
| 9134  | CCNE2 (cyclin E2)                         |                                                                      | 1.33  | AAGAAGAGTATTAATATATA   | NM_004702: | NM_057749:NM_057735:           |
| 9134  | CCNE2 (cyclin E2)                         |                                                                      | 0.46  | CTCCAAGTTGATGCTCTTAAA  | NM_004702: | NM_057749:NM_057735:           |
| 899   | CCNF (cyclin F)                           |                                                                      | -2.35 | CACGGACAACACTTACAAGTA  | NM_001761: | NM_001761:                     |
| 899   | CCNF (cyclin F)                           |                                                                      | -1.49 | CCGGTTATCAGTAAGAGAT    | NM_001761: | NM_001761:                     |
| 900   | CCNG1 (cyclin G1)                         |                                                                      | 1.45  | CACAGTATATCTTATTCTTAA  | NM_004060: | NM_199246:NM_004060:           |
| 900   | CCNG1 (cyclin G1)                         |                                                                      | 1.09  | CTGGATTTACAGCACCAA     | NM_004060: | NM_199246:NM_004060:           |
| 901   | CCNG2 (cyclin cyclin G2)                  |                                                                      | -0.06 | AAGAGTGAGTATGCTCTTAAA  | NM_004354: | NM_004354:                     |
| 901   | CCNG2 (cyclin cyclin G2)                  |                                                                      | 0.17  | CTGAGAGAGTGGTTTCTTAA   | NM_004354: | NM_004354:                     |
| 902   | CCNH (cyclin H)                           |                                                                      | 0.03  | AGGAAGCATATCAACCTTTAA  | NM_001239: | NM_001239:                     |
| 902   | CCNH (cyclin H)                           |                                                                      | 0.28  | CTGAGCTTGCACCTTAACTGAA | NM_001239: | NM_001239:                     |
| 8812  | CCNK (cyclin K)                           |                                                                      | -2.60 | AAGCAACTCAAGGTGATAAA   | NM_003858: | NM_003858:                     |
| 8812  | CCNK (cyclin K)                           |                                                                      | -2.41 | ATCCTGGATCTTACTACAAA   | NM_003858: | NM_003858:                     |
| 57018 | CCNL1 (cyclin L1)                         |                                                                      | 1.95  | CCCTAGCAGTATCTAATTA    | NM_020307: | NM_020307:                     |
| 57018 | CCNL1 (cyclin L1)                         |                                                                      | 0.51  | CTCCAAGAAGCACTATAATA   | NM_020307: | NM_020307:                     |
| 81669 | CCNL2 (cyclin L2)                         |                                                                      | -0.58 | CGCGTATGACATGGTAATAA   | NM_030937: | NM_030937:                     |
| 81669 | CCNL2 (cyclin L2)                         |                                                                      | 1.40  | GAGGAGTAGTACGTTTACTA   | NM_030937: | NM_030937:                     |
| 904   | CCNT1 (cyclin T1)                         |                                                                      | 0.35  | AGGCTTTGAACTAACAATTGA  | NM_001240: | NM_001240:                     |
| 904   | CCNT1 (cyclin T1)                         |                                                                      | -0.02 | TTGGAACATGTCATCAAGGTA  | NM_001240: | NM_001240:                     |
| 905   | CCNT2 (cyclin T2)                         |                                                                      | -0.51 | AAGCAAGAATACTACTATAA   | NM_001241: | NM_001241:NM_058241:           |
| 905   | CCNT2 (cyclin T2)                         |                                                                      | 0.25  | AAGGGCTTTCTGGTAATTTA   | NM_001241: | NM_001241:NM_058241:           |
| 1230  | CCR1 (chemokine (C-C motif) receptor 1)   |                                                                      | 0.05  | CTGGATCGACTCAAGTTGAA   | NM_001295: | NM_001295:                     |
| 1230  | CCR1 (chemokine (C-C motif) receptor 1)   |                                                                      | -0.35 | GACGGAAGAGTTGAGACCTAA  | NM_001295: | NM_001295:                     |
| 2826  | CCR10 (chemokine (C-C motif) receptor 10) |                                                                      | -0.65 | CAGGCTGAGGGTCTGGGGAAA  | NM_016602: | NM_016602:                     |
| 2826  | CCR10 (chemokine (C-C motif) receptor 10) |                                                                      | -1.16 | CTGCTGGATCTGCCGATCTA   | NM_016602: | NM_016602:                     |

|        |             |                                                    |       |                        |               |                         |
|--------|-------------|----------------------------------------------------|-------|------------------------|---------------|-------------------------|
| 1231   | CCR2        | chemokine (C-C motif) receptor 2                   | 0.74  | CCACATCTCGTTCTCGGTTTA  | NM_000647:    | NM_000647:NM_000648:    |
| 1231   | CCR2        | chemokine (C-C motif) receptor 2                   | 1.19  | TACGGTGCTCCGTGCATAAA   | NM_000647:    | NM_000647:NM_000648:    |
| 1232   | CCR3        | chemokine (C-C motif) receptor 3                   | 0.43  | CACCTGAATGTAGATAGTTA   | NM_001837:    | NM_178329:NM_001837:    |
| 1232   | CCR3        | chemokine (C-C motif) receptor 3                   | 0.10  | CGAATTTATGACCAACACTCA  | NM_001837:    | NM_178329:NM_001837:    |
| 1233   | CCR4        | chemokine (C-C motif) receptor 4                   | -1.28 | ATGGAGTAAATCGCTACCTTT  | NM_005508:    | NM_005508:              |
| 1233   | CCR4        | chemokine (C-C motif) receptor 4                   | -0.05 | TTGAATGAAGTTGATAGTAA   | NM_005508:    | NM_005508:              |
| 1234   | CCR5        | chemokine (C-C motif) receptor 5                   | 0.75  | AAGATGGATTATCAAGTGTC   | NM_000579:    | NM_000579:              |
| 1234   | CCR5        | chemokine (C-C motif) receptor 5                   | -0.51 | TAGGTGAGGATTGATTACCTA  | NM_000579:    | NM_000579:              |
| 1235   | CCR6        | chemokine (C-C motif) receptor 6                   | -0.05 | AGGGATCCTACGATTACTCAA  | NM_031409:    | NM_031409:              |
| 1235   | CCR6        | chemokine (C-C motif) receptor 6                   | -0.70 | TAGGGAGTTCCAGCAACAAA   | NM_031409:    | NM_031409:NM_004367:    |
| 1236   | CCR7        | chemokine (C-C motif) receptor 7                   | 0.80  | AAGGACGTGCGGAACCTTTAA  | NM_001838:    | NM_001838:              |
| 1236   | CCR7        | chemokine (C-C motif) receptor 7                   | 2.04  | CAAGACCATGACCGATACCTA  | NM_001838:    | NM_001838:              |
| 1237   | CCR8        | chemokine (C-C motif) receptor 8                   | 1.41  | CAGCTGTTCCACCATCAGTCA  | NM_005201:    | NM_005201:              |
| 1237   | CCR8        | chemokine (C-C motif) receptor 8                   | -4.78 | TAGTATCAATGATTACTCAA   | NM_005201:    | NM_005201:              |
| 10803  | CCR9        | chemokine (C-C motif) receptor 9                   | -0.08 | AAGGATGAATCTGAACTATA   | NM_006641:    | NM_006641:NM_031200:    |
| 10803  | CCR9        | chemokine (C-C motif) receptor 9                   | -0.07 | CAGCTGTTTATCTCTTGCTA   | NM_006641:    | NM_006641:NM_031200:    |
| 23552  | CCRK        | cell cycle related kinase                          | -3.99 | AAGGAGAAGTGCAGAGATA    | NM_012119:    | NM_178432:NM_012119:    |
| 23552  | CCRK        | cell cycle related kinase                          | -2.17 | TGGCGAGATAGTTGCCCTCAA  | NM_012119:    | NM_178432:NM_012119:    |
| 51554  | CCRL1       | chemokine (C-C motif) receptor-like 1              | 1.57  | CGCCGTGGTGCACCTTATA    | NM_016557:    | NM_178445:NM_016557:    |
| 51554  | CCRL1       | chemokine (C-C motif) receptor-like 1              | 0.98  | TTCCATGGTATGGCAATTTA   | NM_016557:    | NM_178445:NM_016557:    |
| 9034   | CCRL2       | chemokine (C-C motif) receptor-like 2              | 0.84  | ACGCTTGGTCCGAAACATCAA  | NM_003965:    | NM_003965:              |
| 9034   | CCRL2       | chemokine (C-C motif) receptor-like 2              | -0.69 | CTGTTTGGCTTATCCTGGTA   | NM_003965:    | NM_003965:              |
| 9973   | CCS         | copper chaperone for superoxide dismutase          | -6.56 | CACGTTGGAGTTCCGCGGTGCA | NM_005125:    | NM_005125:              |
| 9973   | CCS         | copper chaperone for superoxide dismutase          | 0.23  | CAGCTGGGGAATCACTTTAA   | NM_005125:    | NM_005125:              |
| 10576  | CCT2        | chaperonin containing TCP1, subunit 2 (beta)       | 0.91  | CAGGCAATTAATTTATAATTA  | NM_006431:    | NM_006431:              |
| 10576  | CCT2        | chaperonin containing TCP1, subunit 2 (beta)       | -0.13 | AAGGAGAAAGTTGAACTATT   | NM_006431:    | NM_006431:              |
| 10575  | CCT4        | chaperonin containing TCP1, subunit 4 (delta)      | -0.26 | TAGAGTTGGCCCTACGATTAA  | NM_006430:    | NM_006430:              |
| 10575  | CCT4        | chaperonin containing TCP1, subunit 4 (delta)      | 0.34  | TTGCTCATATTGACCAATTTA  | NM_006430:    | NM_006430:              |
| 22948  | CCT5        | chaperonin containing TCP1, subunit 5 (epsilon)    | 1.74  | CAGCTGATAGTCTATAATAA   | NM_012073:    | NM_012073:              |
| 22948  | CCT5        | chaperonin containing TCP1, subunit 5 (epsilon)    | -0.81 | TAGCGTCTGTTGACATAAA    | NM_012073:    | NM_012073:              |
| 10694  | CCT8        | chaperonin containing TCP1, subunit 8 (theta)      | -1.20 | AAGGCTGATTTGTAGTAGTA   | NM_006585:    | NM_006585:              |
| 10694  | CCT8        | chaperonin containing TCP1, subunit 8 (theta)      | 0.71  | GAGGCTGTATAGAAACATA    | NM_006585:    | NM_006585:              |
| 929    | CD14 (CD14) | CD14 antigen                                       | 0.28  | CAGCCTAGACCTGCTGACAA   | NM_000591:    | NM_000591:              |
| 929    | CD14 (CD14) | CD14 antigen                                       | -1.08 | CTCAGAGGTCGGAAGACTTA   | NM_000591:    | NM_000591:              |
| 977    | CD151       | CD151 antigen (Raph blood group)                   | 0.72  | CACATACAGGTGCTCAATAAA  | NM_004357:    | NM_139030:NM_004357:    |
| 977    | CD151       | CD151 antigen (Raph blood group)                   | -0.82 | CTGCCACATACAGGTGCTCAA  | NM_004357:    | NM_139030:NM_004357:    |
| 11126  | CD160       | CD160 antigen                                      | -0.62 | AAGAGATGCTAAATATACCAA  | NM_007053:    | NM_007053:              |
| 11126  | CD160       | CD160 antigen                                      | 1.15  | AAGGAACGCGACTAAACTTAA  | NM_007053:    | NM_007053:              |
| 9332   | CD163       | CD163 antigen                                      | 1.03  | CGCATTATTCTTCTTGACTAA  | NM_004244:    | NM_004244:NM_203416:    |
| 9332   | CD163       | CD163 antigen                                      | 0.03  | TGCGATTATTCTTCTTGACTA  | NM_004244:    | NM_004244:NM_203416:    |
| 283316 | CD163L1     | CD163 antigen-like 1                               | 0.30  | ATGGTCTAACTTGGCCGAAA   | NM_174941:    | NM_174941:              |
| 283316 | CD163L1     | CD163 antigen-like 1                               | -0.14 | CACAATGAGGATGCACATTA   | NM_174941:    | NM_174941:              |
| 57126  | CD177       | CD177 antigen                                      | -0.93 | CACCATTAATGACACCGGAAA  | NM_020406:    | NM_020406:              |
| 57126  | CD177       | CD177 antigen                                      | 0.57  | CCCTCTGACCTCAATACCTAA  | NM_020406:    | NM_020406:              |
| 4064   | CD180       | CD180 antigen                                      | -2.91 | AAGCCTGAACCTCAATGGCAA  | NM_005582:    | NM_005582:              |
| 4064   | CD180       | CD180 antigen                                      | -0.88 | TGGGACTATCACGAAGACCAA  | NM_005582:    | NM_005582:              |
| 930    | CD19        | CD19 antigen                                       | 1.34  | CCCTTTGTATTCTTAATAAA   | NM_001770:    | NM_001770:              |
| 930    | CD19        | CD19 antigen                                       | -1.61 | CCCGGAGAGTCTGACCCCAT   | NM_001770:    | NM_001770:              |
| 909    | CD1A        | CD1a antigen                                       | -1.04 | CTCCACATGTTCACTAATTA   | NM_001763:    | NM_001763:              |
| 909    | CD1A        | CD1a antigen                                       | 0.90  | AAGCTTCTTGAGTTAGCTTA   | NM_001763:    | NM_001763:              |
| 910    | CD1B        | CD1b antigen                                       | -4.11 | CTGAGTGTCAAGAATGCTTCA  | NM_001764:    | NM_001764:              |
| 910    | CD1B        | CD1b antigen                                       | 0.70  | CTGGTCTAAAGGTAACCTTA   | NM_001764:    | NM_001764:              |
| 911    | CD1C        | CD1c antigen                                       | -0.99 | CCCGTGCAGCTCCATTTAAA   | NM_001765:    | NM_001765:              |
| 911    | CD1C        | CD1c antigen                                       | 0.09  | ACCCAGGAGCCTAGTACAATA  | NM_001765:    | NM_001765:              |
| 912    | CD1D (CD1d) | CD1d antigen                                       | -0.44 | CCGGTGTGAAACCTACTGAA   | NM_001766:    | NM_001766:              |
| 912    | CD1D (CD1d) | CD1d antigen                                       | 0.43  | TTGGTAAACTTGGCCACTCA   | NM_001766:    | NM_001766:              |
| 913    | CD1E        | CD1e antigen                                       | 0.00  | TACCTAGATATTAAGGAAATA  | NM_030893:    | NM_030893:              |
| 913    | CD1E        | CD1e antigen                                       | 0.41  | CGGGCCGACACACTGTGAAA   | NM_030893:    | NM_030893:              |
| 914    | CD2         | CD2 antigen (p50), sheep red blood cell receptor   | 0.48  | CCCGAATTAACCTGTATGAA   | NM_001767:    | NM_001767:              |
| 914    | CD2         | CD2 antigen (p50), sheep red blood cell receptor   | -1.81 | TAAGTAGAGCTTCCATGTAA   | NM_001767:    | NM_001767:              |
| 131450 | CD200R1     | CD200 receptor 1                                   | -0.20 | ATGGTATATGTGTCAATTTAT  | NM_138806:    | NM_138806:NM_170780:    |
| 131450 | CD200R1     | CD200 receptor 1                                   | -0.05 | AACAACAACAGAGATACATTA  | NM_138806:    | NM_138806:NM_170780:    |
| 344807 | CD200R2     | CD200 cell surface glycoprotein receptor isoform 2 | 2.11  | AGCGTTGCTCTACTGATCAT   | NM_001008784: | NM_001008784:           |
| 344807 | CD200R2     | CD200 cell surface glycoprotein receptor isoform 2 | -0.76 | CTGATCATTCTTATGTGAAA   | NM_001008784: | NM_001008784:           |
| 50489  | CD207       | CD207 antigen, langerin                            | 0.50  | CAGGATGACTTTGACAGTTAA  | NM_015717:    | NM_015717:              |
| 50489  | CD207       | CD207 antigen, langerin                            | 0.13  | ACCTGGATTCTGAAATTAATA  | NM_015717:    | NM_015717:              |
| 30835  | CD209       | CD209 antigen                                      | 0.38  | CTGTTCAACTTTGTGTAATA   | NM_021155:    | NM_021155:              |
| 30835  | CD209       | CD209 antigen                                      | -1.38 | CTGGAACGACACAATGTAA    | NM_021155:    | NM_021155:              |
| 933    | CD22        | CD22 antigen                                       | -0.02 | CCGGCTGTGGAGGAAAGTCAA  | NM_001771:    | NM_001771:              |
| 933    | CD22        | CD22 antigen                                       | -0.39 | CACGAATATTGCCCAGTTT    | NM_001771:    | NM_001771:              |
| 10666  | CD226       | CD226 antigen                                      | 0.93  | ACCGGTCAACCTACCAATCAA  | NM_006566:    | NM_006566:              |
| 10666  | CD226       | CD226 antigen                                      | -0.35 | TAGAATGTGTGATACATCAA   | NM_006566:    | NM_006566:              |
| 51744  | CD244       | CD244 natural killer cell receptor 2B4             | 1.46  | TCCCTGCATCTCATACCTTTA  | NM_016382:    | NM_016382:              |
| 51744  | CD244       | CD244 natural killer cell receptor 2B4             | 1.37  | CAAGTATTGTAACTAGAAA    | NM_016382:    | NM_016382:              |
| 919    | CD247       | CD247 antigen                                      | -2.60 | ACCCAACACATGGGACCTATA  | NM_000734:    | NM_000734:NM_198053:    |
| 919    | CD247       | CD247 antigen                                      | -0.13 | CACGCTTTCAGCGAATGACAA  | NM_000734:    | NM_000734:NM_198053:    |
| 57124  | CD248       | CD248 antigen, endosialin                          | -3.30 | CACGCTGGCTGCGACGGCTA   | NM_020404:    | NM_020404:              |
| 57124  | CD248       | CD248 antigen, endosialin                          | 0.80  | CCCTATGATCTCAACCAATA   | NM_020404:    | NM_020404:              |
| 29126  | CD274       | CD274 antigen                                      | -4.92 | GCGAATTAAGTGAAGTCAA    | NM_014143:    | NM_014143:              |
| 29126  | CD274       | CD274 antigen                                      | -2.87 | CACGGTCCCAAGGACCTATA   | NM_014143:    | NM_014143:              |
| 80381  | CD276       | CD276 antigen                                      | -9.28 | CAGCAAGCCCTGGAGCCCAA   | NM_025240:    | NM_001024736:NM_025240: |
| 80381  | CD276       | CD276 antigen                                      | 0.22  | CTGAACTCTGCAGACAAA     | NM_025240:    | NM_001024736:NM_025240: |
| 940    | CD28        | CD28 antigen (Tp44)                                | 0.68  | ATGATGTTCTTCAACTATAA   | NM_006139:    | NM_006139:              |
| 940    | CD28        | CD28 antigen (Tp44)                                | 1.60  | CAGGATGAGGTTGCTATAATA  | NM_006139:    | NM_006139:              |
| 23607  | CD2AP       | CD2-associated protein                             | 0.71  | CAGAATGAGACAATCAGTTAA  | NM_012120:    | NM_012120:              |
| 23607  | CD2AP       | CD2-associated protein                             | 0.38  | TACGATGATAAATTAACCTAA  | NM_012120:    | NM_012120:              |
| 10871  | CD300C      | CD300c antigen                                     | -6.13 | CTGGCCAGCGTGCACGAGAAA  | NM_006678:    | NM_006678:              |
| 10871  | CD300C      | CD300c antigen                                     | -1.27 | CAGTGTGAGTAAACACACTGAA | NM_006678:    | NM_006678:              |
| 342510 | CD300E      | CD300e antigen                                     | -0.67 | GAGCATGTACAGGGATATAA   | NM_181449:    | NM_181449:              |
| 342510 | CD300E      | CD300e antigen                                     | 0.64  | TCCCATCTTCTGTGGTGAA    | NM_181449:    | NM_181449:              |
| 124599 | CD300LB     | CD300 antigen like family member B                 | -0.09 | AAGGATGGGAGACCTACATTA  | NM_174892:    | NM_174892:              |
| 124599 | CD300LB     | CD300 antigen like family member B                 | -0.29 | CAGCAATATGGCAGTGTTCAT  | NM_174892:    | NM_174892:              |
| 146722 | CD300LF     | CD300 antigen like family member F                 | 0.59  | CCCAAGATATCTGTGCTCTA   | NM_139018:    | NM_139018:              |
| 146722 | CD300LF     | CD300 antigen like family member F                 | -0.70 | CAGAATTCGAGGAGAAATAAT  | NM_139018:    | NM_139018:              |
| 146894 | CD300LG     | CD300 antigen like family member G                 | 1.01  | CAGGCAATTAATCTTGTATAT  | NM_145273:    | NM_145273:              |
| 146894 | CD300LG     | CD300 antigen like family member G                 | 1.05  | CACGCTTGAAGTGGGAGGAAA  | NM_145273:    | NM_145273:              |
| 9936   | CD302       | CD302 antigen                                      | 0.07  | TAGCTAGTAATAACAATATAA  | NM_014880:    | NM_014880:              |
| 9936   | CD302       | CD302 antigen                                      | 1.20  | GAGGCTATTTAAGTAAATTTA  | NM_014880:    | NM_014880:              |
| 945    | CD33        | CD33 antigen (gp67)                                | 0.58  | TAAGTGTATGATGCACACAA   | NM_001772:    | NM_001772:              |

|        |             |                                                                       |       |                         |            |                                                                                                                                              |
|--------|-------------|-----------------------------------------------------------------------|-------|-------------------------|------------|----------------------------------------------------------------------------------------------------------------------------------------------|
| 945    | CD33        | CD33 antigen (gp67)                                                   | 1.18  | CCCACAGGCAATGGGTTTATA   | NM_001772: | NM_001772:                                                                                                                                   |
| 947    | CD34 (CD34) | CD34 antigen                                                          | 0.34  | CACGGTGGTGGCTGATACCGAA  | NM_001773: | NM_001025109:NM_001773:                                                                                                                      |
| 947    | CD34 (CD34) | CD34 antigen                                                          | 0.23  | AACGGCCATTGAGCAAGACAA   | NM_001773: | NM_001025109:NM_001773:                                                                                                                      |
| 948    | CD36        | CD36 antigen (collagen type I receptor, thrombospondin receptor)      | 0.43  | CAGCAGCAACATTCGAAGTTAA  | NM_000072: | NM_001001547:NM_001001548:NM_000072:                                                                                                         |
| 948    | CD36        | CD36 antigen (collagen type I receptor, thrombospondin receptor)      | 0.59  | CAGGTGCTTAACACTAATTTCA  | NM_000072: | NM_001001547:NM_001001548:NM_000072:                                                                                                         |
| 952    | CD38        | CD38 antigen (p45)                                                    | -1.01 | CTCAATGGATCCCGCAGTAAA   | NM_001775: | NM_001775:                                                                                                                                   |
| 952    | CD38        | CD38 antigen (p45)                                                    | -1.02 | CTGGAATCGATTATAAGCAAAA  | NM_001775: | NM_001775:                                                                                                                                   |
| 915    | CD3D        | CD3d antigen, delta polypeptide (TIT3 complex)                        | 1.11  | CAGGCTATATATGGTATTAAA   | NM_000732: | NM_000732:                                                                                                                                   |
| 915    | CD3D        | CD3d antigen, delta polypeptide (TIT3 complex)                        | -1.90 | CACGAGGAATATATAGGTGTA   | NM_000732: | NM_000732:                                                                                                                                   |
| 916    | CD3E        | CD3e antigen, epsilon polypeptide (TIT3 complex)                      | -2.62 | CTCCGCCATCTTAGTAAAGTA   | NM_000733: | NM_000733:                                                                                                                                   |
| 916    | CD3E        | CD3e antigen, epsilon polypeptide (TIT3 complex)                      | -1.50 | ATGGTGGTATTACACAGACA    | NM_000733: | NM_000733:                                                                                                                                   |
| 917    | CD3G        | CD3g antigen, gamma polypeptide (TIT3 complex)                        | -0.21 | CTCGAGGATGTATCAGTGTA    | NM_000073: | NM_000073:                                                                                                                                   |
| 917    | CD3G        | CD3g antigen, gamma polypeptide (TIT3 complex)                        | 0.65  | CAGCCCTAAATCTAGACTCAA   | NM_000073: | NM_000073:                                                                                                                                   |
| 920    | CD4         | CD4 antigen (p55)                                                     | -0.14 | ACCGGTTTCAGAAAGACATGTA  | NM_000616: | NM_000616:                                                                                                                                   |
| 920    | CD4         | CD4 antigen (p55)                                                     | 0.76  | TCCAGCATAGTCTATAAGAAA   | NM_000616: | NM_000616:                                                                                                                                   |
| 958    | CD40        | CD40 antigen (TNF receptor superfamily member 5)                      | -0.01 | CCCAGTCGGCTTCTTCCCAA    | NM_001250: | NM_001250:NM_152854:                                                                                                                         |
| 958    | CD40        | CD40 antigen (TNF receptor superfamily member 5)                      | 2.06  | TTGGTGGTGGCTTTATCAAAA   | NM_001250: | NM_001250:NM_152854:                                                                                                                         |
| 959    | CD40LG      | CD40 ligand (TNF superfamily, member 5, hyper-IgM syndrome)           | 0.76  | ACACAGCATGATGCAAAACATA  | NM_000074: | NM_000074:                                                                                                                                   |
| 959    | CD40LG      | CD40 ligand (TNF superfamily, member 5, hyper-IgM syndrome)           | 1.79  | TGGGAAACAGCTGACCGTTAA   | NM_000074: | NM_000074:                                                                                                                                   |
| 960    | CD44        | CD44 antigen (Indian blood group)                                     | 1.02  | ATGGCTGATTTGTAACCTTA    | NM_000610: | NM_001001390:NM_001001391:NM_001001389:NM_001001392:NM_000610:                                                                               |
| 960    | CD44        | CD44 antigen (Indian blood group)                                     | 0.00  | CACCATTATCTGGAAGAAA     | NM_000610: | NM_001001390:NM_001001391:NM_001001389:NM_001001392:NM_000610:                                                                               |
| 4179   | CD46        | CD46 antigen, complement regulatory protein                           | 0.07  | ACGAGTAGATTATAAGTGTA    | NM_172350: | NM_172356:NM_153826:NM_172358:NM_172359:NM_172350:NM_172360:NM_172351:NM_172352:NM_172361:NM_172353:NM_172355:NM_172354:NM_172357:NM_002389: |
| 4179   | CD46        | CD46 antigen, complement regulatory protein                           | -0.01 | CAGAAGCGTATATGAATTCAA   | NM_172350: | NM_172356:NM_153826:NM_172358:NM_172359:NM_172350:NM_172360:NM_172351:NM_172352:NM_172361:NM_172353:NM_172355:NM_172354:NM_172357:NM_002389: |
| 961    | CD47        | CD47 antigen (Rh-related antigen, integrin-associated signal transduc | -3.91 | CACGATAAGTTTACTCTCCGA   | NM_198793: | NM_001025080:NM_001025079:NM_001777:NM_198793:                                                                                               |
| 961    | CD47        | CD47 antigen (Rh-related antigen, integrin-associated signal transduc | 2.79  | CACACTGAAGTATACGTAAA    | NM_198793: | NM_001025080:NM_001025079:NM_001777:NM_198793:                                                                                               |
| 962    | CD48        | CD48 antigen (B-cell membrane protein)                                | -2.70 | CAGAAGCATGCTGCTGAATTA   | NM_001778: | NM_001778:                                                                                                                                   |
| 962    | CD48        | CD48 antigen (B-cell membrane protein)                                | -5.36 | CTGCAAGTCTTGACCCCTGTA   | NM_001778: | NM_001778:                                                                                                                                   |
| 921    | CD5         | CD5 antigen (p56-62)                                                  | -1.04 | AAGAGTTTAGTTGAGGAGAAA   | NM_014207: | NM_014207:                                                                                                                                   |
| 921    | CD5         | CD5 antigen (p56-62)                                                  | 1.84  | ATGGTCCAAAGCCGCAATAAA   | NM_014207: | NM_014207:                                                                                                                                   |
| 1604   | CD55        | CD55 antigen, decay accelerating factor for complement (Cromer bloc   | -1.63 | ATGAACACATTTATAAAGTAA   | NM_000574: | NM_000574:                                                                                                                                   |
| 1604   | CD55        | CD55 antigen, decay accelerating factor for complement (Cromer bloc   | -1.64 | CCAGAGTACTACAATATTA     | NM_000574: | NM_000574:                                                                                                                                   |
| 965    | CD58        | CD58 antigen, (lymphocyte function-associated antigen 3)              | 1.75  | AGCAATGTAACCTAACTCAA    | NM_001779: | NM_001779:                                                                                                                                   |
| 965    | CD58        | CD58 antigen, (lymphocyte function-associated antigen 3)              | 0.05  | TAGCAGTAATTCACAACTGTA   | NM_001779: | NM_001779:                                                                                                                                   |
| 966    | CD59        | CD59 antigen, complement regulatory protein                           | 0.15  | CAGAATAGCTTGGTCTTAAA    | NM_000611: | NM_203329:NM_203330:NM_203331:NM_000611:                                                                                                     |
| 966    | CD59        | CD59 antigen, complement regulatory protein                           | 1.05  | CTCGGTTAAATAGAGAGTAAA   | NM_000611: | NM_203329:NM_203330:NM_203331:NM_000611:                                                                                                     |
| 922    | CD5L        | CD5 antigen-like (scavenger receptor cysteine rich family)            | 0.11  | ACGGTACATTTACACATTTA    | NM_005894: | NM_005894:                                                                                                                                   |
| 922    | CD5L        | CD5 antigen-like (scavenger receptor cysteine rich family)            | 1.03  | TACGGCTACATTTACACATTT   | NM_005894: | NM_005894:                                                                                                                                   |
| 923    | CD6         | CD6 antigen                                                           | 0.72  | CAGGGAGGATGCTGCCTCCAA   | NM_006725: | NM_006725:                                                                                                                                   |
| 923    | CD6         | CD6 antigen                                                           | -0.22 | CTGGCGGTTCAACAACTCCAA   | NM_006725: | NM_006725:                                                                                                                                   |
| 967    | CD63        | CD63 antigen (melanoma 1 antigen)                                     | 0.09  | CAACGAGAAGCGGATCCATAA   | NM_001780: | NM_001780:                                                                                                                                   |
| 967    | CD63        | CD63 antigen (melanoma 1 antigen)                                     | -0.16 | CAGATGGAGAATTACCAGAAA   | NM_001780: | NM_001780:                                                                                                                                   |
| 968    | CD68        | CD68 antigen                                                          | -3.15 | CACGTTTCATCCAACAAGCAA   | NM_001251: | NM_001251:                                                                                                                                   |
| 968    | CD68        | CD68 antigen                                                          | -3.65 | CACAGTTTCATCCAACAAGCAA  | NM_001251: | NM_001251:                                                                                                                                   |
| 969    | CD69        | CD69 antigen (p60, early T-cell activation antigen)                   | 1.52  | TAGGTTTGTGACTTTCCTAAA   | NM_001781: | NM_001781:                                                                                                                                   |
| 969    | CD69        | CD69 antigen (p60, early T-cell activation antigen)                   | 0.60  | CTAGGGAATCTTGAGAATAAA   | NM_001781: | NM_001781:                                                                                                                                   |
| 924    | CD7         | CD7 antigen (p41)                                                     | -0.87 | CCCAGCCGTCACGAATAAAA    | NM_006137: | NM_006137:                                                                                                                                   |
| 924    | CD7         | CD7 antigen (p41)                                                     | 0.01  | ACGGTGTCTTCTCAGTGACAAA  | NM_006137: | NM_006137:                                                                                                                                   |
| 971    | CD72        | CD72 antigen                                                          | 0.97  | CAGCTTCAACAGGATTTGAAA   | NM_001782: | NM_001782:                                                                                                                                   |
| 971    | CD72        | CD72 antigen                                                          | -0.92 | CGCACTAAGCTTATGCTCAA    | NM_001782: | NM_001782:                                                                                                                                   |
| 972    | CD74        | CD74 antigen (invariant polypeptide of major histocompatibility compl | 1.23  | CAGGGAGAAGGGATAACCCCTA  | NM_004355: | NM_001025158:NM_004355:NM_001025159:                                                                                                         |
| 972    | CD74        | CD74 antigen (invariant polypeptide of major histocompatibility compl | -0.53 | CCAAAGTCGGGAACAGCAGATAA | NM_004355: | NM_001025158:NM_004355:NM_001025159:                                                                                                         |
| 973    | CD79A       | CD79a antigen (immunoglobulin-associated alpha)                       | -0.10 | CAGGGCCACTTAGTGATAATA   | NM_021601: | NM_001783:NM_021601:                                                                                                                         |
| 973    | CD79A       | CD79a antigen (immunoglobulin-associated alpha)                       | -2.29 | CAGCGGTAATGAGCCCTTAA    | NM_021601: | NM_001783:NM_021601:                                                                                                                         |
| 974    | CD79B       | CD79b antigen (immunoglobulin-associated beta)                        | -2.88 | CAGCACCTTGGCACAGCTGAA   | NM_021602: | NM_021602:NM_000626:                                                                                                                         |
| 974    | CD79B       | CD79b antigen (immunoglobulin-associated beta)                        | -0.25 | ACGGTGTGCTGCTGAGAAACCA  | NM_021602: | NM_021602:NM_000626:                                                                                                                         |
| 941    | CD80        | CD80 antigen (CD28 antigen ligand 1, B7-1 antigen)                    | -0.35 | AAGCTATCTTCAAAATGCTAA   | NM_005191: | NM_005191:                                                                                                                                   |
| 941    | CD80        | CD80 antigen (CD28 antigen ligand 1, B7-1 antigen)                    | 1.81  | AAGGGATAGTCCAAAGACTTA   | NM_005191: | NM_005191:                                                                                                                                   |
| 975    | CD81        | CD81 antigen (target of antiproliferative antibody 1)                 | -5.68 | CACCTTCTATGAGGCATCTA    | NM_004356: | NM_004356:                                                                                                                                   |
| 975    | CD81        | CD81 antigen (target of antiproliferative antibody 1)                 | 1.44  | CGCCCTGTGATATAACGTTT    | NM_004356: | NM_004356:                                                                                                                                   |
| 3732   | CD82        | CD82 antigen                                                          | 0.34  | CTCAAGGGTGTGATATTGTA    | NM_002231: | NM_001024844:NM_002231:                                                                                                                      |
| 3732   | CD82        | CD82 antigen                                                          | -1.36 | CAGGGTCTCTTATCAACTCA    | NM_002231: | NM_001024844:NM_002231:                                                                                                                      |
| 8832   | CD84        | CD84 antigen (leukocyte antigen)                                      | -4.58 | CAGAATGTGGGCTGCATATAA   | NM_003874: | NM_003874:                                                                                                                                   |
| 8832   | CD84        | CD84 antigen (leukocyte antigen)                                      | -1.42 | CTCAGAAATCTTCCAGTGAAA   | NM_003874: | NM_003874:                                                                                                                                   |
| 942    | CD86        | CD86 antigen (CD28 antigen ligand 2, B7-2 antigen)                    | -0.74 | CAACGGAATAGGAAGACCAA    | NM_006889: | NM_175862:NM_006889:                                                                                                                         |
| 942    | CD86        | CD86 antigen (CD28 antigen ligand 2, B7-2 antigen)                    | -0.23 | CCAATTTCAATAAACAAGAA    | NM_006889: | NM_175862:NM_006889:                                                                                                                         |
| 925    | CD8A        | CD8 antigen, alpha polypeptide (p32)                                  | -0.11 | TTGGCAGAGTCTTATAATGTA   | NM_171827: | NM_001768:NM_171827:                                                                                                                         |
| 925    | CD8A        | CD8 antigen, alpha polypeptide (p32)                                  | -5.52 | TAGGGTGTACTACTGCTGTTA   | NM_171827: | NM_001768:NM_171827:                                                                                                                         |
| 928    | CD9         | CD9 antigen (p24)                                                     | 0.02  | AAAGAGGCTTCCGACAATAAA   | NM_001769: | NM_001769:                                                                                                                                   |
| 928    | CD9         | CD9 antigen (p24)                                                     | 1.26  | ACAAATGTCTATCAACTTAA    | NM_001769: | NM_001769:                                                                                                                                   |
| 22918  | CD93        | CD93 antigen                                                          | -0.13 | TACGACGTTATGTTGGGTAA    | NM_012072: | NM_012072:                                                                                                                                   |
| 22918  | CD93        | CD93 antigen                                                          | 0.07  | CTGGACTGGAATCTTAGCAAA   | NM_012072: | NM_012072:                                                                                                                                   |
| 10225  | CD96        | CD96 antigen                                                          | 0.88  | AACGTTTACTCAGTCTGAAA    | NM_005816: | NM_198196:NM_005816:                                                                                                                         |
| 10225  | CD96        | CD96 antigen                                                          | -0.03 | CCCTAAGATAAATACAGGAAA   | NM_005816: | NM_198196:NM_005816:                                                                                                                         |
| 976    | CD97        | CD97 antigen                                                          | 0.17  | AAGGTTGTAGACGTTGTGTA    | NM_001784: | NM_078481:NM_001784:NM_001025160:                                                                                                            |
| 976    | CD97        | CD97 antigen                                                          | -1.07 | TCGGAGCTTGGTGTGACCTA    | NM_001784: | NM_078481:NM_001784:NM_001025160:                                                                                                            |
| 4267   | CD99        | CD99 antigen                                                          | -4.59 | CCGGATGGTGGTTCGGATTA    | NM_002414: | NM_002414:                                                                                                                                   |
| 4267   | CD99        | CD99 antigen                                                          | 0.03  | TGGGGGATGATGTTTACTAA    | NM_002414: | NM_002414:                                                                                                                                   |
| 8556   | CDC14A      | CDC14 cell division cycle 14 homolog A (S. cerevisiae)                | 0.32  | ACAGATATTGCTGCAAACTAA   | NM_003672: | NM_033312:NM_003672:NM_033313:                                                                                                               |
| 8556   | CDC14A      | CDC14 cell division cycle 14 homolog A (S. cerevisiae)                | 0.44  | CAGATATTGCTGCAAACTAA    | NM_003672: | NM_033312:NM_003672:NM_033313:                                                                                                               |
| 8555   | CDC14B      | CDC14 cell division cycle 14 homolog B (S. cerevisiae)                | -0.79 | CAAGATCAGCAAGAACCAGAA   | NM_003671: | NM_033332:NM_033331:NM_003671:                                                                                                               |
| 8555   | CDC14B      | CDC14 cell division cycle 14 homolog B (S. cerevisiae)                | -0.29 | CCGTACAGTGTATGATGACGAA  | NM_003671: | NM_033332:NM_033331:NM_003671:                                                                                                               |
| 168448 | CDC14C      | CDC14 cell division cycle 14 homolog C (S. cerevisiae)                | -5.39 | AAGCAATGAAGGGGAAGCGGAA  | XM_498195: | XM_498195:XM_498195:                                                                                                                         |
| 168448 | CDC14C      | CDC14 cell division cycle 14 homolog C (S. cerevisiae)                | -0.64 | AAGATGGTGCCAAAGAAATAA   | XM_498195: | XM_498195:XM_498195:                                                                                                                         |
| 8881   | CDC16       | CDC16 cell division cycle 16 homolog (S. cerevisiae)                  | 0.42  | ATAGTGGAAATAAAGAGGTTA   | NM_003903: | NM_003903:                                                                                                                                   |
| 8881   | CDC16       | CDC16 cell division cycle 16 homolog (S. cerevisiae)                  | -0.46 | CCCATGCACCTCGGTCCAGGAA  | NM_003903: | NM_003903:                                                                                                                                   |
| 983    | CDC2        | cell division cycle 2, G1 to S and G2 to M                            | 0.14  | CAGGTTATATCTCATCTTTGA   | NM_001786: | NM_033379:NM_001786:                                                                                                                         |
| 983    | CDC2        | cell division cycle 2, G1 to S and G2 to M                            | 2.29  | TGGGAAATTTCTCTATTAAA    | NM_001786: | NM_033379:NM_001786:                                                                                                                         |

|        |          |                                                                              |        |                        |               |                                                    |
|--------|----------|------------------------------------------------------------------------------|--------|------------------------|---------------|----------------------------------------------------|
| 991    | CDC20    | CDC20 cell division cycle 20 homolog (S. cerevisiae)                         | 0.36   | CACCACCATGATGTCGGGTA   | NM_001255:    | NM_001255:                                         |
| 991    | CDC20    | CDC20 cell division cycle 20 homolog (S. cerevisiae)                         | 0.11   | CTCCCTAAGCTGGAAACAGCTA | NM_001255:    | NM_001255:                                         |
| 8697   | CDC23    | CDC23 (cell division cycle 23, yeast, homolog)                               | -2.12  | ACCATCTTAAATTAAGCCTTA  | NM_004661:    | NM_004661:                                         |
| 8697   | CDC23    | CDC23 (cell division cycle 23, yeast, homolog)                               | -0.03  | TACGAGAAGCTCAATCAACTA  | NM_004661:    | NM_004661:                                         |
| 993    | CDC25A   | cell division cycle 25A                                                      | -5.00  | AAGGCGCTATTGGCGCTTCA   | NM_001789:    | NM_001789;NM_201567:                               |
| 993    | CDC25A   | cell division cycle 25A                                                      | 3.01   | AAGGGTTATCTCTTTCATACA  | NM_001789:    | NM_001789;NM_201567:                               |
| 994    | CDC25B   | (cell cell division cycle 25B)                                               | -0.94  | CAGGAGGCTGAGGAACCTAAA  | NM_004358:    | NM_212530;NM_004358;NM_021874;NM_021872;NM_021873: |
| 994    | CDC25B   | (cell cell division cycle 25B)                                               | -1.52  | CCCAGTCTGTGAGTTAGTGA   | NM_004358:    | NM_021873:                                         |
| 995    | CDC25C   | cell division cycle 25C                                                      | 0.48   | CAGGAAGGCTTATGTTTAAA   | NM_001790:    | NM_001790;NM_022809:                               |
| 995    | CDC25C   | cell division cycle 25C                                                      | 0.07   | CCAGAGCTATATACCTCTAAA  | NM_001790:    | NM_001790;NM_022809:                               |
| 996    | CDC27    | cell division cycle 27                                                       | -1.17  | GGCTTGATATCAACCCCTCAA  | NM_001256:    | NM_001256:                                         |
| 996    | CDC27    | cell division cycle 27                                                       | 1.73   | TACGCTTATGCCATACTCTA   | NM_001256:    | NM_001256:                                         |
| 8621   | CDC2L5   | cell division cycle 2-like 5 (cholinesterase-related cell division controlle | 0.14   | AACGACGTAGTTTCATTGGAA  | NM_003718:    | NM_003718;NM_031267:                               |
| 8621   | CDC2L5   | cell division cycle 2-like 5 (cholinesterase-related cell division controlle | 0.64   | TCAGAGTATTATCAATATGAA  | NM_003718:    | NM_003718;NM_031267:                               |
| 23097  | CDC2L6   | cell division cycle 2-like 6 (CDK8-like)                                     | 0.04   | CACGTCTGCTCGGAAGATATA  | NM_015076:    | NM_015076:                                         |
| 23097  | CDC2L6   | cell division cycle 2-like 6 (CDK8-like)                                     | 1.33   | GAGGATTTTGGAGTACGAA    | NM_015076:    | NM_015076:                                         |
| 998    | CDC42    | cell division cycle 42 (GTP binding protein, 25kDa)                          | 2.24   | ATCAGATTGAAATATTTAAA   | NM_001791:    | NM_044472;NM_001791:                               |
| 998    | CDC42    | cell division cycle 42 (GTP binding protein, 25kDa)                          | -0.11  | CATCAGATTGAAATATTTAAA  | NM_001791:    | NM_044472;NM_001791:                               |
| 8476   | CDC42BPA | CDC42 binding protein kinase alpha (DMPK-like)                               | 1.51   | CAGACTTCCGTAGCAGCTTA   | NM_003607:    | NM_014826;NM_003607:                               |
| 8476   | CDC42BPA | CDC42 binding protein kinase alpha (DMPK-like)                               | -0.47  | CAGATAATAGTCGGAACAAA   | NM_003607:    | NM_014826;NM_003607:                               |
| 9578   | CDC42BPB | CDC42 binding protein kinase beta (DMPK-like)                                | 0.71   | CGCCGAGATATTCATGTATA   | NM_006035:    | NM_006035:                                         |
| 9578   | CDC42BPB | CDC42 binding protein kinase beta (DMPK-like)                                | 0.63   | TAGGACCTTAAGAGAATAGTA  | NM_006035:    | NM_006035:                                         |
| 55561  | CDC42BPG | CDC42 binding protein kinase gamma (DMPK-like)                               | 0.01   | CGCCGCTGGCTTGCACCTCA   | XM_290516:    | NM_017525:                                         |
| 55561  | CDC42BPG | CDC42 binding protein kinase gamma (DMPK-like)                               | -1.57  | CTGCGCCCTACCAACTTCAA   | XM_290516:    | NM_017525:                                         |
| 56990  | CDC42SE2 | CDC42 small effector 2                                                       | -2.77  | AAGGGAGGTTATGGAGGTGGA  | NM_020240:    | NM_020240:                                         |
| 56990  | CDC42SE2 | CDC42 small effector 2                                                       | -2.97  | CAGGAGACCTGCTCAGTGAA   | NM_020240:    | NM_020240:                                         |
| 8318   | CDC45L   | CDC45 cell division cycle 45-like (S. cerevisiae)                            | -0.16  | TACGACGATGGAATATCAT    | NM_003504:    | NM_003504:                                         |
| 8318   | CDC45L   | CDC45 cell division cycle 45-like (S. cerevisiae)                            | 0.52   | TAGGCCAGTCAATGCTGCAA   | NM_003504:    | NM_003504:                                         |
| 8317   | CDC7     | CDC7 cell division cycle 7 (S. cerevisiae)                                   | -0.61  | TAGGTCAGTATATCTACCTAA  | NM_003503:    | NM_003503:                                         |
| 8317   | CDC7     | CDC7 cell division cycle 7 (S. cerevisiae)                                   | -0.01  | TAGGTTATGAGCTAGGATA    | NM_003503:    | NM_003503:                                         |
| 79577  | CDC73    | cell division cycle 73, Paf1/RNA polymerase II complex component, hc         | -1.23  | AAGGATCTCGAACCCCTTAA   | NM_024529:    | NM_024529:                                         |
| 79577  | CDC73    | cell division cycle 73, Paf1/RNA polymerase II complex component, hc         | -1.28  | CAGCGATCTACTGAAAGTCAA  | NM_024529:    | NM_024529:                                         |
| 83540  | CDCA1    | cell division cycle associated 1                                             | -15.44 | AAGCATGAAGATGTTAAGCAA  | NM_031423:    | NM_031423;NM_145697:                               |
| 83540  | CDCA1    | cell division cycle associated 1                                             | 0.87   | GAGGATGCAATAAAGTTCAA   | NM_031423:    | NM_031423;NM_145697:                               |
| 113130 | CDCA5    | cell division cycle associated 5                                             | 0.27   | CTCGGAAAGTTTCTCGCGCAA  | NM_080668:    | NM_080668:                                         |
| 113130 | CDCA5    | cell division cycle associated 5                                             | 0.07   | GAGGAACTAAATTAAGGAAA   | NM_080668:    | NM_080668:                                         |
| 55143  | CDCA8    | cell division cycle associated 8                                             | -0.85  | AAGGTAATACAGGTAGATGAA  | NM_018101:    | NM_018101:                                         |
| 55143  | CDCA8    | cell division cycle associated 8                                             | 0.34   | CGGGAGGTTTAGGCTCAGATA  | NM_018101:    | NM_018101:                                         |
| 999    | CDH1     | cadherin 1, type 1, E-cadherin (epithelial)                                  | -1.68  | CTAGGTTATTGCTACTGTAA   | NM_004360:    | NM_004360:                                         |
| 999    | CDH1     | cadherin 1, type 1, E-cadherin (epithelial)                                  | -0.34  | TCGGCCTGAAGTACTCGTAA   | NM_004360:    | NM_004360:                                         |
| 1009   | CDH11    | cadherin 11, type 2, OB-cadherin (osteoblast)                                | 0.67   | ACCGTCGGAATTCATTGTCAA  | NM_001797:    | NM_001797:                                         |
| 1009   | CDH11    | cadherin 11, type 2, OB-cadherin (osteoblast)                                | 1.48   | CAGAGAGGATACATTAATAA   | NM_001797:    | NM_001797:                                         |
| 28513  | CDH19    | cadherin 19, type 2                                                          | -0.53  | CAAGATGATGTCGATCCTTAT  | NM_021153:    | NM_021153:                                         |
| 28513  | CDH19    | cadherin 19, type 2                                                          | 0.15   | CTCCATCTTAAATGCCGACAA  | NM_021153:    | NM_021153:                                         |
| 1000   | CDH2     | cadherin 2, type 1, N-cadherin (neuronal)                                    | 0.54   | ACCAATCGACTTTGAAACAAA  | NM_001792:    | NM_001792:                                         |
| 1000   | CDH2     | cadherin 2, type 1, N-cadherin (neuronal)                                    | -1.04  | CAGATCGATATATGACGACAAA | NM_001792:    | NM_001792:                                         |
| 28316  | CDH20    | cadherin 20, type 2                                                          | 0.01   | CAGCTTACTTGGGTAGATTA   | NM_031891:    | NM_031891:                                         |
| 28316  | CDH20    | cadherin 20, type 2                                                          | -1.48  | CGCGGGGTGCTTCCGCGACAAA | NM_031891:    | NM_031891:                                         |
| 1001   | CDH3     | cadherin 3, type 1, P-cadherin (placental)                                   | -4.22  | AAGCCTTACCTGCGCGTAAA   | NM_001793:    | NM_001793:                                         |
| 1001   | CDH3     | cadherin 3, type 1, P-cadherin (placental)                                   | 0.06   | CAGATGAAATCGGCAACTTTA  | NM_001793:    | NM_001793:                                         |
| 1003   | CDH5     | cadherin 5, type 2, VE-cadherin (vascular epithelium)                        | -0.15  | ACCACGAAACGTAAGTTCAA   | NM_001795:    | NM_001795:                                         |
| 1003   | CDH5     | cadherin 5, type 2, VE-cadherin (vascular epithelium)                        | 0.43   | ACGTATTATCACAAATACGAA  | NM_001795:    | NM_001795:                                         |
| 8558   | CDK10    | cyclin-dependent kinase (CDC2-like) 10                                       | -0.40  | CGGGAAGCAGCCCTACAACAAA | NM_003674:    | NM_052988;NM_003674;NM_052987:                     |
| 8558   | CDK10    | cyclin-dependent kinase (CDC2-like) 10                                       | 1.23   | CGGCTGAAGTGATTCGTTAA   | NM_003674:    | NM_052988;NM_003674:                               |
| 1017   | CDK2     | cyclin-dependent kinase 2                                                    | 0.08   | AACAATATATATTAATTTCAA  | NM_001798:    | NM_052827;NM_001798:                               |
| 1017   | CDK2     | cyclin-dependent kinase 2                                                    | -0.80  | CACAATGTTTAAAGGCCAAA   | NM_001798:    | NM_052827;NM_001798:                               |
| 1018   | CDK3     | (cyclin-cyclin-dependent kinase 3)                                           | -5.05  | ATGGATATGTTCCGAAAGGTA  | NM_001258:    | NM_001258:                                         |
| 1018   | CDK3     | (cyclin-cyclin-dependent kinase 3)                                           | 0.15   | CAGACTGGATTTGGAGATGGA  | NM_001258:    | NM_001258:                                         |
| 1019   | CDK4     | cyclin-dependent kinase 4                                                    | -0.18  | AAGGTAATCCGAGTGGAGCAA  | NM_000075:    | NM_000075:                                         |
| 1019   | CDK4     | cyclin-dependent kinase 4                                                    | 0.51   | ACCCTGGTGTGGAGCATGTA   | NM_000075:    | NM_000075:                                         |
| 1020   | CDK5     | cyclin-dependent kinase 5                                                    | -0.83  | CACCTACGGAAGTGTGTTCAA  | NM_004935:    | NM_004935:                                         |
| 1020   | CDK5     | cyclin-dependent kinase 5                                                    | 1.32   | CCCTTGTGGACTTTATTTAAA  | NM_004935:    | NM_004935:                                         |
| 1020   | CDK5     | cyclin-dependent kinase 5                                                    | -9.87  | CGGGAGGATCTGCCTACTCAA  | XM_498294:    | XM_498294;NM_004935:                               |
| 8851   | CDK5R1   | cyclin-dependent kinase 5, regulatory subunit 1 (p35)                        | 0.01   | CGGGAAGCCAGCGTGTGTA    | NM_003885:    | NM_003885:                                         |
| 8851   | CDK5R1   | cyclin-dependent kinase 5, regulatory subunit 1 (p35)                        | 0.03   | TGAGCTGGTTTACTACTTAAA  | NM_003885:    | NM_003885:                                         |
| 8941   | CDK5R2   | cyclin-dependent kinase 5, regulatory subunit 2 (p39)                        | -5.89  | CAGCAAGAAGTGACACCCCAA  | NM_003936:    | NM_003936:                                         |
| 8941   | CDK5R2   | cyclin-dependent kinase 5, regulatory subunit 2 (p39)                        | -6.62  | CGGGAAGACCTTCTCCGCAA   | NM_003936:    | NM_003936:                                         |
| 1021   | CDK6     | cyclin-dependent kinase 6                                                    | -3.75  | AAGACTCAAGGTGGTCAGTAA  | NM_001259:    | NM_001259:                                         |
| 1021   | CDK6     | cyclin-dependent kinase 6                                                    | -0.38  | TCGGTGTATGCTTAGGTTAA   | NM_001259:    | NM_001259:                                         |
| 1022   | CDK7     | cyclin-dependent kinase 7 (MO15 homolog, Xenopus laevis, cdk-activ.          | -0.02  | CGGATGGCTCTGGACGTGAA   | NM_001799:    | NM_001799:                                         |
| 1022   | CDK7     | cyclin-dependent kinase 7 (MO15 homolog, Xenopus laevis, cdk-activ.          | 0.71   | GAGGCTTAAAGTAGCTTTAA   | NM_001799:    | NM_001799:                                         |
| 1024   | CDK8     | cyclin-dependent kinase 8                                                    | 1.51   | CAGAAGAAATCGTATACCAA   | NM_001260:    | NM_001260:                                         |
| 1024   | CDK8     | cyclin-dependent kinase 8                                                    | -5.53  | CCAGCTGGACAGAATATTCAA  | NM_001260:    | NM_001260:                                         |
| 1025   | CDK9     | cyclin-dependent kinase 9 (CDC2-related kinase)                              | -0.02  | AACCCTGCAAGGTAGTATA    | NM_001261:    | NM_001261:                                         |
| 1025   | CDK9     | cyclin-dependent kinase 9 (CDC2-related kinase)                              | -0.04  | TAGGACATGAAGGCTGCTAA   | NM_001261:    | NM_001261:                                         |
| 8814   | CDKL1    | cyclin-dependent kinase-like 1 (CDC2-related kinase)                         | -1.07  | CTGACCCGAGTGACTACTATA  | NM_004196:    | NM_004196:                                         |
| 8814   | CDKL1    | cyclin-dependent kinase-like 1 (CDC2-related kinase)                         | -0.15  | TGGGAAATCCGGAATGCTCAA  | NM_004196:    | NM_004196:                                         |
| 8999   | CDKL2    | cyclin-dependent kinase-like 2 (CDC2-related kinase)                         | 1.00   | ATGATGTGTTAGTAATCTAA   | NM_003948:    | NM_003948:                                         |
| 8999   | CDKL2    | cyclin-dependent kinase-like 2 (CDC2-related kinase)                         | 1.00   | TTCTACGGACTTAAATTTAA   | NM_003948:    | NM_003948:                                         |
| 51265  | CDKL3    | cyclin-dependent kinase-like 3                                               | 1.46   | CAACATTATTGTCATGACTA   | NM_016508:    | NM_016508:                                         |
| 51265  | CDKL3    | cyclin-dependent kinase-like 3                                               | -4.29  | TGGGAGATAGTGCCATTTAA   | NM_016508:    | NM_016508:                                         |
| 344387 | CDKL4    | (cyclin-cyclin-dependent kinase-like 4)                                      | 0.07   | CCACAAGATCGTATACCCATA  | NM_001009565: | NM_001009565:                                      |
| 344387 | CDKL4    | (cyclin-cyclin-dependent kinase-like 4)                                      | -0.10  | CTGAATCAAAATCGTTACGCAA | NM_001009565: | NM_001009565:                                      |
| 6792   | CDKL5    | cyclin-dependent kinase-like 5                                               | 0.76   | AAGATAGACGCTTCATGTTAA  | NM_003159:    | NM_001037343;NM_003159:                            |
| 6792   | CDKL5    | cyclin-dependent kinase-like 5                                               | -0.79  | AAGGCAATAATGCTAATTTAA  | NM_003159:    | NM_001037343;NM_003159:                            |
| 1026   | CDKN1A   | cyclin-dependent kinase inhibitor 1A (p21, Cip1)                             | -0.48  | ATGATCTTATGACTTTTAAA   | NM_000389:    | NM_078467;NM_000389:                               |
| 1026   | CDKN1A   | cyclin-dependent kinase inhibitor 1A (p21, Cip1)                             | -5.36  | CAGTTTGTGTGCTTAAATTTA  | NM_000389:    | NM_078467;NM_000389:                               |
| 1027   | CDKN1B   | cyclin-dependent kinase inhibitor 1B (p27, Kip1)                             | -0.43  | AAAGCGTTGGATGACTGCTAA  | NM_004064:    | NM_004064:                                         |
| 1027   | CDKN1B   | cyclin-dependent kinase inhibitor 1B (p27, Kip1)                             | -3.93  | ACCGACGATTCCTACTCTAA   | NM_004064:    | NM_004064:                                         |
| 1028   | CDKN1C   | cyclin-dependent kinase inhibitor 1C (p27, Kip2)                             | 0.46   | AAGCTTAAAGACTCAATTTAA  | NM_000076:    | NM_000076:                                         |
| 1028   | CDKN1C   | cyclin-dependent kinase inhibitor 1C (p27, Kip2)                             | -1.91  | TACACTGGTCCCAAAGTGTAA  | NM_000076:    | NM_000076:                                         |
| 1029   | CDKN2A   | cyclin-dependent kinase inhibitor 2A (melanoma, p16, inhibits CDK4)          | -0.72  | CACGCCATAAGCCGACATTTCA | NM_000077:    | NM_058197;NM_058195;NM_000077:                     |
| 1029   | CDKN2A   | cyclin-dependent kinase inhibitor 2A (melanoma, p16, inhibits CDK4)          | -5.95  | CAGAACCAAAGCTCAAAATAAA | NM_000077:    | NM_058197;NM_058195;NM_000077:                     |
| 1030   | CDKN2B   | cyclin-dependent kinase inhibitor 2B (p15, inhibits CDK4)                    | 0.54   | CTGCTTACTTATGCCATAGAA  | NM_004936:    | NM_078487;NM_004936:                               |
| 1030   | CDKN2B   | cyclin-dependent kinase inhibitor 2B (p15, inhibits CDK4)                    | -1.56  | CTGGAAAGTTAAATAAATTTAA | NM_004936:    | NM_078487;NM_004936:                               |
| 1031   | CDKN2C   | cyclin-dependent kinase inhibitor 2C (p18, inhibits CDK4)                    | 0.66   | CAGGCTTATGAATATATTTAA  | NM_001262:    | NM_001262:                                         |
| 1031   | CDKN2C   | cyclin-dependent kinase inhibitor 2C (p18, inhibits CDK4)                    | -1.43  | TGCTCTACTTTTCAATTTAA   | NM_001262:    | NM_001262;NM_078626:                               |

|        |         |                                                                        |       |                        |            |                                          |
|--------|---------|------------------------------------------------------------------------|-------|------------------------|------------|------------------------------------------|
| 1032   | CDKN2D  | cyclin-dependent kinase inhibitor 2D (p19, inhibits CDK4)              | -2.52 | ACCCAAGGGCAGAGCATTTAA  | NM_001800: | NM_001800.NM_079421:                     |
| 1032   | CDKN2D  | cyclin-dependent kinase inhibitor 2D (p19, inhibits CDK4)              | -5.16 | ATGAGTTATGAGTATTTCATA  | NM_001800: | NM_001800.NM_079421:                     |
| 1033   | CDKN3   | cyclin-dependent kinase inhibitor 3 (CDK2-associated dual specificity) | 1.07  | CACAAATCAAGATCTGTATCAA | NM_005192: | NM_005192:                               |
| 1033   | CDKN3   | cyclin-dependent kinase inhibitor 3 (CDK2-associated dual specificity) | 0.05  | TCGGGACAAATTAGCTGCACA  | NM_005192: | NM_005192:                               |
| 1045   | CDX2    | caudal type homeobox transcription factor 2                            | -3.97 | CCGGGAGAGCTGGAATGGCTA  | NM_001265: | NM_001265:                               |
| 1045   | CDX2    | caudal type homeobox transcription factor 2                            | -2.01 | TTGGTTTGGTCTGTGTAA     | NM_001265: | NM_001265:                               |
| 1046   | CDX4    | (caudal) caudal type homeobox transcription factor 4                   | 0.40  | CAGGTTATAGTCTCGAATGA   | NM_005193: | NM_005193:                               |
| 1046   | CDX4    | (caudal) caudal type homeobox transcription factor 4                   | 0.27  | CAAGGAGAGAAAGATGATCAA  | NM_005193: | NM_005193:                               |
| 634    | CEACAM1 | carcinoembryonic antigen-related cell adhesion molecule 1 (biliary gly | 0.78  | GAGGAGGAGGATTATAACTTA  | NM_001712: | NM_001024912:NM_001712:                  |
| 634    | CEACAM1 | carcinoembryonic antigen-related cell adhesion molecule 1 (biliary gly | -6.17 | ACGGCAGTAATGCTTCTCCTA  | NM_001712: | NM_001024912:NM_001712:                  |
| 1050   | CEBPA   | CCAAT/enhancer binding protein (C/EBP), alpha                          | -2.69 | CAGCCGATATCAACACTTGTGA | NM_004364: | NM_004364:                               |
| 1050   | CEBPA   | CCAAT/enhancer binding protein (C/EBP), alpha                          | -6.32 | CTCAGCCTTTGTTGACTGTGA  | NM_004364: | NM_004364:                               |
| 1051   | CEBPB   | CCAAT/enhancer binding protein (C/EBP), beta                           | -0.02 | CGGGCCCTGAGTAATCGCTTA  | NM_005194: | NM_005194:                               |
| 1051   | CEBPB   | CCAAT/enhancer binding protein (C/EBP), beta                           | 0.01  | ACGTCTATGTGACAGATGAA   | NM_005194: | NM_005194:                               |
| 1052   | CEBPD   | CCAAT/enhancer binding protein (C/EBP), delta                          | 0.07  | CACCACTAACTGCGAGAGAA   | NM_005195: | NM_005195:                               |
| 1052   | CEBPD   | CCAAT/enhancer binding protein (C/EBP), delta                          | -0.78 | CGCCGACCTCTTCAACAGCAA  | NM_005195: | NM_005195:                               |
| 1053   | CEBPE   | CCAAT/enhancer binding protein (C/EBP), epsilon                        | -1.57 | TAGACCTATGATAAATGGCAA  | NM_001805: | NM_001805:                               |
| 1053   | CEBPE   | CCAAT/enhancer binding protein (C/EBP), epsilon                        | -1.10 | CTCCGATCTCTTCCGGCTGAA  | NM_001805: | NM_001805:                               |
| 1054   | CEBPG   | CCAAT/enhancer binding protein (C/EBP), gamma                          | -0.04 | CAAGGAATTAAGTGTACTCAA  | NM_001806: | NM_001806:                               |
| 1054   | CEBPG   | CCAAT/enhancer binding protein (C/EBP), gamma                          | 0.68  | CAGCTTAGCGTGGAAACCAAT  | NM_001806: | NM_001806:                               |
| 51816  | CECR1   | cat eye syndrome chromosome region, candidate 1                        | -0.13 | CCAAAGCTAGTTAGTACTCAA  | NM_017424: | NM_017424:NM_177405:                     |
| 51816  | CECR1   | cat eye syndrome chromosome region, candidate 1                        | -0.14 | CAGCTTATAATCGGATATTTA  | NM_017424: | NM_017424:NM_177405:                     |
| 1056   | CEL     | carboxyl ester lipase (bile salt-stimulated lipase)                    | 0.02  | TCCTTAGGCTTGGTATCAAA   | NM_001807: | NM_001807:                               |
| 1056   | CEL     | carboxyl ester lipase (bile salt-stimulated lipase)                    | -0.01 | AGCCCTGACGCTGGCCTATAA  | NM_001807: | NM_001807:                               |
| 9620   | CELSR1  | cadherin, EGF LAG seven-pass G-type receptor 1 (flamingo homolog,      | 1.64  | CGCCCAACAGTGTGATTACCTA | NM_014246: | NM_014246:                               |
| 9620   | CELSR1  | cadherin, EGF LAG seven-pass G-type receptor 1 (flamingo homolog,      | 0.36  | CGGGATCTCGTGTGTGATCAA  | NM_014246: | NM_014246:                               |
| 1952   | CELSR2  | cadherin, EGF LAG seven-pass G-type receptor 2 (flamingo homolog,      | 0.69  | ACGACAACAATCGAACCTTTA  | NM_001408: | NM_001408:                               |
| 1952   | CELSR2  | cadherin, EGF LAG seven-pass G-type receptor 2 (flamingo homolog,      | 0.49  | CACGTGGTGGTCTTCAACGTA  | NM_001408: | NM_001408:                               |
| 1951   | CELSR3  | cadherin, EGF LAG seven-pass G-type receptor 3 (flamingo homolog,      | -0.66 | CGGGGAGGCAGTATCAGTGTA  | NM_001407: | NM_001407:                               |
| 1951   | CELSR3  | cadherin, EGF LAG seven-pass G-type receptor 3 (flamingo homolog,      | -0.90 | CTGGAATTCGCTACAGTAA    | NM_001407: | NM_001407:                               |
| 1059   | CENPB   | (cent)centromere protein B, 80kDa                                      | -0.78 | CGCCTTGAGAAGCACAGTTTA  | NM_001810: | NM_001810:                               |
| 1059   | CENPB   | (cent)centromere protein B, 80kDa                                      | 0.91  | TTCCGAGCTTTGGACATCAA   | NM_001810: | NM_001810:                               |
| 1062   | CENPE   | centromere protein E, 312kDa                                           | 0.06  | CACGATACTGTTAACTGAAAT  | NM_001813: | NM_001813:                               |
| 1062   | CENPE   | centromere protein E, 312kDa                                           | -5.81 | CAGGTTAATCCTACCACACAA  | NM_001813: | NM_001813:                               |
| 1063   | CENPF   | centromere protein F, 350/400ka (mitosin)                              | -0.14 | ACCGAGAGAAATGACTTCTA   | NM_016343: | NM_016343:                               |
| 1063   | CENPF   | centromere protein F, 350/400ka (mitosin)                              | -0.69 | CAGAATCTTAGTAGTCAAGTA  | NM_016343: | NM_016343:                               |
| 64946  | CENPH   | (cent)centromere protein H                                             | 0.26  | AACGTTTACAGTTGAGTACA   | NM_022909: | NM_022909:                               |
| 64946  | CENPH   | (cent)centromere protein H                                             | 0.03  | ATGATAACATGAAACACCTA   | NM_022909: | NM_022909:                               |
| 11033  | CENTA1  | centaurin, alpha 1                                                     | -1.50 | GAGGCGCACTTCAAGCATAAA  | NM_006869: | NM_006869:                               |
| 11033  | CENTA1  | centaurin, alpha 1                                                     | 0.11  | CCGGAAGTTTGTGCTGACAGA  | NM_006869: | NM_006869:                               |
| 11064  | CEP110  | centrosomal protein 110kDa                                             | -0.02 | CAGCTATAACTTAATAGGGAA  | NM_007018: | NM_007018:                               |
| 11064  | CEP110  | centrosomal protein 110kDa                                             | 0.32  | CAGGATAATTTGGCTTTGATA  | NM_007018: | NM_007018:                               |
| 55165  | CEP55   | centrosomal protein 55kDa                                              | 0.02  | ATCAGCTGTGATTTCAACA    | NM_018131: | NM_018131:                               |
| 55165  | CEP55   | centrosomal protein 55kDa                                              | 0.00  | CAGGTTATTGCTAATGGGTTA  | NM_018131: | NM_018131:                               |
| 64781  | CERK    | ceramide kinase                                                        | 0.78  | ATGGCATTATTGATCTGAAA   | NM_182661: | NM_182661:NM_022766:                     |
| 64781  | CERK    | ceramide kinase                                                        | 0.01  | CGGCTTAAACTTTGATCTGTA  | NM_182661: | NM_182661:NM_022766:                     |
| 1066   | CES1    | carboxylesterase 1 (monocyte/macrophage serine esterase 1)             | -0.56 | CTGGTTGATCCCAATGTGAT   | NM_001266: | NM_001266:                               |
| 1066   | CES1    | carboxylesterase 1 (monocyte/macrophage serine esterase 1)             | -0.33 | CCTGAAGAGCTTCAAGCTGAA  | NM_001266: | NM_001266:NM_001025194:NM_001025195:     |
| 8824   | CES2    | carboxylesterase 2 (intestine, liver)                                  | 0.41  | CTGAGAGGCTCTGAAAGAATAA | NM_003869: | NM_003869:NM_198061:                     |
| 8824   | CES2    | carboxylesterase 2 (intestine, liver)                                  | -0.05 | CACCTAAGTGTGAGAAGCCTA  | NM_003869: | NM_003869:NM_198061:                     |
| 51716  | CES4    | carboxylesterase 4-like                                                | -2.10 | ATCGATAGGAATCCAGACCTA  | NM_016280: | NM_016280:                               |
| 51716  | CES4    | carboxylesterase 4-like                                                | 1.48  | ATGAGGATTTTCGGTAGATTT  | NM_016280: | NM_016280:                               |
| 221223 | CES7    | carboxylesterase 7                                                     | 1.07  | CAACAAGATTTCTCAATAAA   | NM_145024: | NM_145024:                               |
| 221223 | CES7    | carboxylesterase 7                                                     | 1.67  | CCCGCAATCATTAGCTCTTTT  | NM_145024: | NM_145024:                               |
| 1068   | CETN1   | centrin, EF-hand protein, 1                                            | 0.32  | TCGGTTCAGAAGCTAAAGTGA  | NM_004066: | NM_004066:                               |
| 1068   | CETN1   | centrin, EF-hand protein, 1                                            | -0.08 | TTCCAGCATAAATGAGATGGAA | NM_004066: | NM_004066:                               |
| 1069   | CETN2   | centrin, EF-hand protein, 2                                            | -3.17 | CAGAACGACTTAGACAAGCA   | NM_004344: | NM_004344:                               |
| 1069   | CETN2   | centrin, EF-hand protein, 2                                            | 0.48  | GCGAATACCCTAATTCCTCAA  | NM_004344: | NM_004344:                               |
| 1070   | CETN3   | centrin, EF-hand protein, 3 (CDC31 homolog, yeast)                     | 0.16  | CAGTTACCCTATATATTTCTA  | NM_004365: | NM_004365:                               |
| 1070   | CETN3   | centrin, EF-hand protein, 3 (CDC31 homolog, yeast)                     | -0.32 | TCGAGCTATGATGAAAGAAAT  | NM_004365: | NM_004365:                               |
| 1071   | CETP    | (choles)cholesterol ester transfer protein, plasma                     | 0.71  | CAGGCTCCTCTTATTAAGAAA  | NM_000078: | NM_000078:                               |
| 1071   | CETP    | (choles)cholesterol ester transfer protein, plasma                     | -2.66 | CAAGGGTCAATTCATCTACAA  | NM_000078: | NM_000078:                               |
| 629    | CFB     | complement factor B                                                    | -0.13 | AAGAAGAAGTGGTTTATTCAA  | NM_001710: | NM_001710:                               |
| 629    | CFB     | complement factor B                                                    | 0.53  | CAGCTCAATGAAATCAATTAT  | NM_001710: | NM_001710:                               |
| 1675   | CFD     | complement factor D (adipsin)                                          | -0.35 | AACCTTGTCTCTCTACAAA    | NM_001928: | NM_001928:                               |
| 1675   | CFD     | complement factor D (adipsin)                                          | -0.05 | CTGCATCTGGTGGTCTTTAT   | NM_001928: | NM_001928:                               |
| 3075   | CFH     | complement factor H                                                    | 0.47  | CAGGTCTTCAAGAAGAAATTA  | NM_000186: | NM_000186:                               |
| 3075   | CFH     | complement factor H                                                    | 0.03  | ATGTTGACTACTCACCTTTAA  | NM_000186: | NM_000186:NM_00104975:NM_000186:         |
| 3426   | CFI     | complement factor I                                                    | -1.06 | TACGGAATCGTTTCTATGAA   | NM_000204: | NM_000204:                               |
| 3426   | CFI     | complement factor I                                                    | -0.76 | CGACCTTAAAGCTATAGTAA   | NM_000204: | NM_000204:                               |
| 1072   | CFL1    | cofilin 1 (non-muscle)                                                 | -1.48 | CAAGCATGAATGCAAGCAAA   | NM_005507: | NM_005507:                               |
| 1072   | CFL1    | cofilin 1 (non-muscle)                                                 | -3.32 | CTGACAGGGATCAAGCATGAA  | NM_005507: | NM_005507:                               |
| 1073   | CFL2    | (cofilin :cofilin 2 (muscle)                                           | 0.72  | AAGGAAATATCATTTATTTAA  | NM_021914: | NM_021914:NM_138638:                     |
| 1073   | CFL2    | (cofilin :cofilin 2 (muscle)                                           | 0.57  | CAGAGATTAAATATGCTTTA   | NM_021914: | NM_021914:NM_138638:                     |
| 8837   | CFLAR   | CASP8 and FADD-like apoptosis regulator                                | 0.69  | CACCGACGAGTCTCAACTAAA  | NM_003879: | NM_003879:                               |
| 8837   | CFLAR   | CASP8 and FADD-like apoptosis regulator                                | 0.30  | TCGAGGATTTCAATCGCGAA   | NM_003879: | NM_003879:                               |
| 1080   | CFTR    | cystic fibrosis transmembrane conductance regulator, ATP-binding ca:   | 1.00  | TCAGCTTATGTCTAGTGAAA   | NM_000492: | NM_000492:                               |
| 1080   | CFTR    | cystic fibrosis transmembrane conductance regulator, ATP-binding ca:   | 0.70  | CTCGAAGTTATGATATTGTA   | NM_000492: | NM_000492:                               |
| 1081   | CGA     | glycoprotein hormones, alpha polypeptide                               | 0.00  | CGCCATGGATTAACAAGAAA   | NM_000735: | NM_000735:                               |
| 1081   | CGA     | glycoprotein hormones, alpha polypeptide                               | 0.16  | CAAGGATATACTGCAGCTTTA  | NM_000735: | NM_000735:                               |
| 1081   | CGA     | glycoprotein hormones, alpha polypeptide                               | 0.23  | CGCCATGGATTAACAAGAAA   | NM_000735: | NM_000735:                               |
| 1081   | CGA     | glycoprotein hormones, alpha polypeptide                               | 0.11  | CAAGGATATACTGCAGCTTTA  | NM_000735: | NM_000735:                               |
| 10668  | CGRRF1  | cell growth regulator with ring finger domain 1                        | 0.98  | CGGGAAAATTTATGATATTTA  | NM_006568: | NM_006568:                               |
| 10668  | CGRRF1  | cell growth regulator with ring finger domain 1                        | 1.42  | CGGGAAAATTTATGATATTTA  | NM_006568: | NM_006568:                               |
| 8208   | CHAF1B  | chromatin assembly factor 1, subunit B (p60)                           | -0.03 | ACGGAAAGTCTGGACCCCTTGA | NM_005441: | NM_005441:                               |
| 8208   | CHAF1B  | chromatin assembly factor 1, subunit B (p60)                           | -3.00 | CACCAATGTCAGGATCTGGAA  | NM_005441: | NM_005441:                               |
| 1103   | CHAT    | choline acetyltransferase                                              | -0.96 | CACGGAGATGTTCTGCTGCTA  | NM_020549: | NM_020984:NM_020549:NM_020986:NM_020985: |
| 1103   | CHAT    | choline acetyltransferase                                              | -1.76 | CCCGAGATGTTCTGATGATGA  | NM_020549: | NM_020984:NM_020549:NM_020986:NM_020985: |
| 1105   | CHD1    | (chrom)chromodomain helicase DNA binding protein 1                     | -0.04 | AAGCTACTTGTTTACATTGTA  | NM_001270: | NM_001270:                               |
| 1105   | CHD1    | (chrom)chromodomain helicase DNA binding protein 1                     | 0.46  | CGGTTTATCAAGAGCTATAA   | NM_001270: | NM_001270:                               |
| 1107   | CHD3    | chromodomain helicase DNA binding protein 3                            | -1.75 | CCGACCCGGTCCGGAACGAA   | NM_005852: | NM_005852:NM_001005271:NM_001005273:     |
| 1107   | CHD3    | chromodomain helicase DNA binding protein 3                            | 0.01  | CCCATACTCGCTATAGATGAA  | NM_005852: | NM_005852:NM_001005273:                  |
| 1108   | CHD4    | chromodomain helicase DNA binding protein 4                            | -1.61 | AAGGTTTAAAGTCTTGAACA   | NM_001273: | NM_001273:                               |
| 1108   | CHD4    | chromodomain helicase DNA binding protein 4                            | -1.67 | CATGAAGGTTATAAATACGAA  | NM_001273: | NM_001273:                               |
| 1111   | CHEK1   | CHK1 checkpoint homolog (S. pombe)                                     | 0.74  | AAGAAGAGATCTGTATCAAT   | NM_001274: | NM_001274:                               |
| 1111   | CHEK1   | CHK1 checkpoint homolog (S. pombe)                                     | -0.60 | CCACCTCATCAACAACAAT    | NM_001274: | NM_001274:                               |
| 11200  | CHEK2   | CHK2 checkpoint homolog (S. pombe)                                     | 1.39  | ACGCCGCTTTGTAATAACAA   | NM_007194: | NM_145862:NM_007194:NM_001005735:        |



|        |                |                                                                         |        |                         |            |                                                                                          |
|--------|----------------|-------------------------------------------------------------------------|--------|-------------------------|------------|------------------------------------------------------------------------------------------|
| 11200  | CHEK2          | CHK2 checkpoint homolog (S. pombe)                                      | 1.34   | AGGACTGCTTATAAAGATTA    | NM_007194: | NM_007194.NM_001005735:                                                                  |
| 1112   | CHE1           | checkpoint suppressor 1                                                 | -0.22  | CGGCTCCTGTTGAATAACAT    | NM_005197: | NM_005197:                                                                               |
| 1112   | CHE1           | checkpoint suppressor 1                                                 | -0.01  | TCGAAGGAGCCTTACAGTAAA   | NM_005197: | NM_005197:                                                                               |
| 55743  | CHFR           | checkpoint with forkhead and ring finger domains                        | -1.55  | AACCAGAGGTTTGACATGGAA   | NM_018223: | NM_018223:                                                                               |
| 55743  | CHFR           | checkpoint with forkhead and ring finger domains                        | -1.00  | TCCCGTGGAGCGGATCTGTAA   | NM_018223: | NM_018223:                                                                               |
| 1113   | CHGA           | chromogranin A (parathyroid secretory protein 1)                        | 0.99   | TATGAACITTTACTAAAGAAA   | NM_001275: | NM_001275:                                                                               |
| 1113   | CHGA           | chromogranin A (parathyroid secretory protein 1)                        | -1.79  | TCGAAGATGTTATGGAGAAA    | NM_001275: | NM_001275:                                                                               |
| 26511  | CHIC2          | cysteine-rich hydrophobic domain 2                                      | 1.43   | AACGAATAACATGATGGAAATA  | NM_012110: | NM_012110:                                                                               |
| 26511  | CHIC2          | cysteine-rich hydrophobic domain 2                                      | 1.94   | AAGAACCITCCTGTTAATGTA   | NM_012110: | NM_012110:                                                                               |
| 1119   | CHKA           | choline kinase alpha                                                    | -1.73  | AGCCGGCGATAGATACTGAA    | NM_001277: | NM_001277.NM_212469:                                                                     |
| 1120   | CHKB           | choline kinase beta                                                     | -0.42  | CTGTGTATGTAACACAATAAA   | NM_005198: | NM_005198:                                                                               |
| 1121   | CHM            | choroideremia (Rab escort protein 1)                                    | -0.99  | CTCCAATATATGTCATGCAT    | NM_000390: | NM_000390:                                                                               |
| 1121   | CHM            | choroideremia (Rab escort protein 1)                                    | 1.55   | CGGAGAGTCTGCATGTTGA     | NM_000390: | NM_000390:                                                                               |
| 57132  | CHMP1B         | chromatin modifying protein 1B                                          | 0.66   | ATAACGTATATTAATAAAA     | NM_020412: | NM_020412:                                                                               |
| 57132  | CHMP1B         | chromatin modifying protein 1B                                          | 0.93   | ATGATGTTCTCATAACGTAT    | NM_020412: | NM_020412:                                                                               |
| 79586  | CHPF           | chondroitin polymerizing factor                                         | 1.07   | AAGCTCCCTGCCITTAATAAA   | NM_024536: | NM_024536:                                                                               |
| 79586  | CHPF           | chondroitin polymerizing factor                                         | -3.49  | CAGCGAGCCGCTCTTACAAA    | NM_024536: | NM_024536:                                                                               |
| 89832  | CHRFAM7A       | CHRNA7 (cholinergic receptor, nicotinic, alpha 7, exons 5-10) and FAI   | 0.94   | ATCGGTTAAATTTGATGCAAA   | NM_139320: | NM_139320:                                                                               |
| 89832  | CHRFAM7A       | CHRNA7 (cholinergic receptor, nicotinic, alpha 7, exons 5-10) and FAI   | -2.68  | CACCGCAACATTAAGATTACA   | NM_139320: | NM_139320.NM_149111:                                                                     |
| 1128   | CHRM1          | cholinergic receptor, muscarinic 1                                      | 1.40   | CGGGTTGGCTAGTCACATAT    | NM_000738: | NM_000738:                                                                               |
| 1128   | CHRM1          | cholinergic receptor, muscarinic 1                                      | -1.11  | TACAGTCAAGAGGCCGACTAA   | NM_000738: | NM_000738:                                                                               |
| 1129   | CHRM2          | cholinergic receptor, muscarinic 2                                      | 0.65   | CAGGTACTTCTGTGCACAAA    | NM_000739: | NM_000739.NM_001006626.NM_001006628.NM_001006629.NM_001006631.NM_001006630.NM_001006632: |
| 1129   | CHRM2          | cholinergic receptor, muscarinic 2                                      | 0.16   | TACGGCTATTGCGCCTTCTA    | NM_000739: | NM_000739.NM_001006626.NM_001006628.NM_001006629.NM_001006631.NM_001006630.NM_001006632: |
| 1131   | CHRM3          | cholinergic receptor, muscarinic 3                                      | 1.06   | CGAGCCAAAGCAACAACAAA    | NM_000740: | NM_000740:                                                                               |
| 1131   | CHRM3          | cholinergic receptor, muscarinic 3                                      | 0.74   | CCTGGTAATTTGTCATTTAA    | NM_000740: | NM_000740:                                                                               |
| 1132   | CHRM4          | cholinergic receptor, muscarinic 4                                      | -0.07  | CCCGAAGGAGAAGAAAGCCAA   | NM_000741: | NM_000741:                                                                               |
| 1132   | CHRM4          | cholinergic receptor, muscarinic 4                                      | -0.12  | COGCTACTTCTGCGTACCACC   | NM_000741: | NM_000741:                                                                               |
| 1133   | CHRM5          | cholinergic receptor, muscarinic 5                                      | 1.50   | AAGAGAGTGGTCTAGTCAAA    | NM_012125: | NM_012125:                                                                               |
| 1133   | CHRM5          | cholinergic receptor, muscarinic 5                                      | 0.98   | CGGGCCAAAGCGTACCGGAAA   | NM_012125: | NM_012125:                                                                               |
| 1134   | CHRNA1         | cholinergic receptor, nicotinic, alpha 1 (muscle)                       | 0.70   | ACGTGTTATATCCCATCTTA    | NM_000079: | NM_000079:                                                                               |
| 1134   | CHRNA1         | cholinergic receptor, nicotinic, alpha 1 (muscle)                       | -0.41  | CAGGTCGACTCATTGAATTA    | NM_000079: | NM_000079:                                                                               |
| 57053  | CHRNA10 (ct)   | cholinergic receptor, nicotinic, alpha 10                               | -1.51  | ATCCCTGACTCAATAAAGTAA   | NM_020402: | NM_020402:                                                                               |
| 57053  | CHRNA10 (ct)   | cholinergic receptor, nicotinic, alpha 10                               | 0.61   | TGGGTTAATGAGAAAACCTGA   | NM_020402: | NM_020402:                                                                               |
| 1135   | CHRNA2 (chc)   | cholinergic receptor, nicotinic, alpha 2 (neuronal)                     | 0.48   | AAGGGCTTTGAAACAATGTTA   | NM_000742: | NM_000742:                                                                               |
| 1135   | CHRNA2 (chc)   | cholinergic receptor, nicotinic, alpha 2 (neuronal)                     | -0.77  | CACGGGCACCTACAACAGCAA   | NM_000742: | NM_000742:                                                                               |
| 1136   | CHRNA3         | cholinergic receptor, nicotinic, alpha 3                                | 0.17   | CCCACCTCTTACTAAGACAAA   | NM_000743: | NM_000743:                                                                               |
| 1136   | CHRNA3         | cholinergic receptor, nicotinic, alpha 3                                | 0.21   | AACTGCTTTAGTACACCTAAA   | NM_000743: | NM_000743:                                                                               |
| 1137   | CHRNA4         | cholinergic receptor, nicotinic, alpha 4                                | 0.56   | ATGAATAATTGAGGTTAGGAA   | NM_000744: | NM_000744:                                                                               |
| 1137   | CHRNA4         | cholinergic receptor, nicotinic, alpha 4                                | 0.77   | CAGAATGAATAATTGAGGTTA   | NM_000744: | NM_000744:                                                                               |
| 1138   | CHRNA5 (chc)   | cholinergic receptor, nicotinic, alpha 5                                | 0.64   | CTGAGTAACAGTAACTCTTTA   | NM_000745: | NM_000745:                                                                               |
| 1138   | CHRNA5 (chc)   | cholinergic receptor, nicotinic, alpha 5                                | 2.09   | CTGAAGTATACATTTAGTTAA   | NM_000745: | NM_000745:                                                                               |
| 8973   | CHRNA6         | cholinergic receptor, nicotinic, alpha 6                                | -0.12  | CAGCATTATTTGATACACTGA   | NM_004198: | NM_004198:                                                                               |
| 8973   | CHRNA6         | cholinergic receptor, nicotinic, alpha 6                                | 0.12   | ACAGCCTAATTAATGAATTA    | NM_004198: | NM_004198:                                                                               |
| 1139   | CHRNA7         | cholinergic receptor, nicotinic, alpha 7                                | -0.59  | ACCAGACATCTCTCTATAA     | NM_000746: | NM_000746:                                                                               |
| 1139   | CHRNA7         | cholinergic receptor, nicotinic, alpha 7                                | -1.40  | CCAGATGGCCAGATTTGGAAA   | NM_000746: | NM_000746:                                                                               |
| 55584  | CHRNA9         | cholinergic receptor, nicotinic, alpha 9                                | 0.81   | TAGCTTCAAAATGAATGCGAA   | NM_017581: | NM_017581:                                                                               |
| 55584  | CHRNA9         | cholinergic receptor, nicotinic, alpha 9                                | 0.22   | CTGGGTAGAAATTAATACAT    | NM_017581: | NM_017581:                                                                               |
| 1140   | CHRN1          | cholinergic receptor, nicotinic, beta 1 (muscle)                        | 0.02   | TAGGTCGCCAGTGAATAGAA    | NM_000747: | NM_000747:                                                                               |
| 1140   | CHRN1          | cholinergic receptor, nicotinic, beta 1 (muscle)                        | 0.90   | CCCAATAGGTTCCAGCCTGAA   | NM_000747: | NM_000747:                                                                               |
| 1141   | CHRN2          | cholinergic receptor, nicotinic, beta 2 (neuronal)                      | 0.16   | AGAGATGACATTTGGTCTGAA   | NM_000748: | NM_000748:                                                                               |
| 1141   | CHRN2          | cholinergic receptor, nicotinic, beta 2 (neuronal)                      | 0.56   | CGCATGCAAGATGAAGTAAA    | NM_000748: | NM_000748:                                                                               |
| 1142   | CHRN3 (chc)    | cholinergic receptor, nicotinic, beta 3                                 | -1.64  | CAGGTAGTACAAGACTGGAAA   | NM_000749: | NM_000749:                                                                               |
| 1142   | CHRN3 (chc)    | cholinergic receptor, nicotinic, beta 3                                 | -0.01  | CGGAGAAATGGGAAACTGAAA   | NM_000749: | NM_000749:                                                                               |
| 1143   | CHRN4 (chc)    | cholinergic receptor, nicotinic, beta 4                                 | -0.56  | CACATGAAGATGACGATGAAA   | NM_000750: | NM_000750:                                                                               |
| 1143   | CHRN4 (chc)    | cholinergic receptor, nicotinic, beta 4                                 | -2.95  | CAGCAAGTCATGCGTGACCAA   | NM_000750: | NM_000750:                                                                               |
| 1144   | CHRN5          | cholinergic receptor, nicotinic, delta                                  | 0.25   | AACAATACAATGAGGAGAAA    | NM_000751: | NM_000751:                                                                               |
| 1144   | CHRN5          | cholinergic receptor, nicotinic, delta                                  | -2.62  | CGCCAGGACATCACCTTCTA    | NM_000751: | NM_000751:                                                                               |
| 1145   | CHRNE          | cholinergic receptor, nicotinic, epsilon                                | 0.34   | TACAGTACTGACAGAAAGAAA   | NM_000080: | NM_000080:                                                                               |
| 1145   | CHRNE          | cholinergic receptor, nicotinic, epsilon                                | -5.41  | CAGGAGGAAAGGGTTACATA    | NM_000080: | NM_000080:                                                                               |
| 1146   | CHRNG          | cholinergic receptor, nicotinic, gamma                                  | 0.01   | CCACCAGAAAGGTTGTTCTA    | NM_005199: | NM_005199:                                                                               |
| 1146   | CHRNG          | cholinergic receptor, nicotinic, gamma                                  | -1.35  | CTGCTCTACTCAGTCACCTA    | NM_005199: | NM_005199:                                                                               |
| 1147   | CHUK           | conserved helix-loop-helix ubiquitous kinase                            | -2.58  | CAGGAGAAGTTCGGTTTAGTA   | NM_001278: | NM_001278:                                                                               |
| 1147   | CHUK           | conserved helix-loop-helix ubiquitous kinase                            | -4.43  | TTCCATAAGCTTGTGACAAA    | NM_001278: | NM_001278:                                                                               |
| 114548 | CIAS1          | cold autoinflammatory syndrome 1                                        | -0.11  | ACAGAAGTACTGACTATATA    | NM_004895: | NM_004895.NM_183395:                                                                     |
| 114548 | CIAS1          | cold autoinflammatory syndrome 1                                        | 0.87   | TTGATAATTTATCTCTCAAA    | NM_004895: | NM_004895.NM_183395:                                                                     |
| 10518  | CIB2           | calcium and integrin binding family member 2                            | -0.75  | CACCGAAGAGCAGCTAGACAAA  | NM_006383: | NM_006383:                                                                               |
| 10518  | CIB2           | calcium and integrin binding family member 2                            | -0.20  | CTGCACCTTCTCAATAAGAAA   | NM_006383: | NM_006383:                                                                               |
| 117286 | CIB3           | calcium and integrin binding family member 3                            | -5.01  | CACGAGCAGCTGGAAAGCGTAT  | NM_054113: | NM_054113:                                                                               |
| 117286 | CIB3           | calcium and integrin binding family member 3                            | -2.11  | CTGGAGCAGCAGGTAACCAAAA  | NM_054113: | NM_054113:                                                                               |
| 1149   | CIDEA          | cell death-inducing DFFA-like effector a                                | -1.17  | CGGGTCTGCTGGATGACAAGAAA | NM_001279: | NM_198289.NM_001279:                                                                     |
| 1149   | CIDEA          | cell death-inducing DFFA-like effector a                                | -1.65  | GAGAGTCACTTCTGACTTTGA   | NM_001279: | NM_198289.NM_001279:                                                                     |
| 27141  | CIDEB (cell d) | cell death-inducing DFFA-like effector b                                | -4.24  | CAGGCTAGATAACCCACCCAAA  | NM_014430: | NM_014430:                                                                               |
| 27141  | CIDEB (cell d) | cell death-inducing DFFA-like effector b                                | -1.49  | CCGATTCACCTTTGACGTGTA   | NM_014430: | NM_014430:                                                                               |
| 63924  | CIDEC          | cell death-inducing DFFA-like effector c                                | -1.08  | CCGTTAAGCTTTGATCTGTA    | NM_022094: | NM_022094:                                                                               |
| 63924  | CIDEC          | cell death-inducing DFFA-like effector c                                | 1.37   | GAGGAAGGCACTCATGGCTTA   | NM_022094: | NM_022094:                                                                               |
| 8483   | CILP           | cartilage intermediate layer protein, nucleotide pyrophosphohydrolase   | 1.43   | AGGGTGTATCATGTTCTCTA    | NM_003613: | NM_003613:                                                                               |
| 8483   | CILP           | cartilage intermediate layer protein, nucleotide pyrophosphohydrolase   | 0.99   | CTAGTGCACATTCAAAATTAA   | NM_003613: | NM_003613:                                                                               |
| 51550  | CINP           | cyclin-dependent kinase 2-interacting protein                           | -0.15  | CGGCTGATTTGGCAAAATTTAA  | NM_032630: | NM_032630:                                                                               |
| 51550  | CINP           | cyclin-dependent kinase 2-interacting protein                           | 1.02   | CGGGCTGATTTGGCAAAATTTA  | NM_032630: | NM_032630:                                                                               |
| 1154   | CISH           | cytokine inducible SH2-containing protein                               | 0.82   | CTGATAAGACTTCATGAAATA   | NM_013324: | NM_145071:                                                                               |
| 1154   | CISH           | cytokine inducible SH2-containing protein                               | 0.95   | ATGGACAACATAAATAGGTAA   | NM_013324: | NM_145071:                                                                               |
| 11113  | CIT            | citron (rho-interacting, serine/threonine kinase 21)                    | 0.43   | ATGGAAGGCACTATTTCTCAA   | NM_007174: | NM_007174:                                                                               |
| 11113  | CIT            | citron (rho-interacting, serine/threonine kinase 21)                    | -0.30  | CAGGATATACCGTAACAGAAA   | NM_007174: | NM_007174:                                                                               |
| 10370  | CITED2         | Cbp/p300-interacting transactivator, with Glu/Asp-rich carboxy-terminus | 0.37   | TGGAATGCTGCTAGTGCAAAA   | NM_006079: | NM_006079:                                                                               |
| 10370  | CITED2         | Cbp/p300-interacting transactivator, with Glu/Asp-rich carboxy-terminus | 0.02   | CAGATTTACGAGTGAAGGAAA   | NM_006079: | NM_006079:                                                                               |
| 26586  | CKAP2          | cytoskeleton associated protein 2                                       | 1.38   | CACACGATTTAGATATTGTA    | NM_018204: | NM_018204:                                                                               |
| 26586  | CKAP2          | cytoskeleton associated protein 2                                       | -0.14  | CGCATTTTGTACTAAGTAAA    | NM_018204: | NM_018204:                                                                               |
| 10970  | CKAP4          | cytoskeleton-associated protein 4                                       | 1.07   | AGGGCGCGGATTTAAAGTCCA   | NM_006825: | NM_006825:                                                                               |
| 10970  | CKAP4          | cytoskeleton-associated protein 4                                       | -1.04  | ACAGGTTCCGACTACCAGAAA   | NM_006825: | NM_006825:                                                                               |
| 9793   | CKAP5          | cytoskeleton associated protein 5                                       | -10.47 | AAGGGTCGACTCAATGATTCA   | NM_014756: | NM_001008938.NM_014756:                                                                  |
| 9793   | CKAP5          | cytoskeleton associated protein 5                                       | -10.73 | CAGGATATTAATGACCGCAA    | NM_014756: | NM_001008938.NM_014756:                                                                  |
| 1152   | CKB            | creatine kinase, brain                                                  | -4.57  | CCAGGTTGAAACTCTCTCGAA   | NM_001823: | NM_001823:                                                                               |
| 1152   | CKB            | creatine kinase, brain                                                  | 0.15   | CCGGCTCACCCAGATTGAAA    | NM_001823: | NM_001823:                                                                               |
| 51192  | CKLF           | chemokine-like factor                                                   | -3.06  | AACAACAGTATTATCATGCTAT  | NM_016951: | NM_181640.NM_016951:                                                                     |
| 51192  | CKLF           | chemokine-like factor                                                   | -0.51  | ATCGATTAATGAAGTGGTTAT   | NM_016951: | NM_181641.NM_016951:                                                                     |

|        |                |                                                                     |       |                         |               |                                          |
|--------|----------------|---------------------------------------------------------------------|-------|-------------------------|---------------|------------------------------------------|
| 1158   | CKM            | creatine kinase, muscle                                             | 0.61  | GACGGGCGAGTTCAAAGGGAA   | NM_001824:    | NM_001824:                               |
| 1158   | CKM            | creatine kinase, muscle                                             | -1.35 | TCCACGCAAGCGATAAATAA    | NM_001824:    | NM_001824:                               |
| 1160   | CKMT2          | creatine kinase, mitochondrial 2 (sarcomeric)                       | -5.74 | CCTGCCTATCTTACAATAAA    | NM_001825:    | NM_001825:                               |
| 1160   | CKMT2          | creatine kinase, mitochondrial 2 (sarcomeric)                       | -1.65 | GAGGTTGAGCTGTTGAGATA    | NM_001825:    | NM_001825:                               |
| 1163   | CKS1B          | CDC28 protein kinase regulatory subunit 1B                          | -0.11 | AACATCTTCTGATAACATTA    | NM_001826:    | NM_001826:                               |
| 1163   | CKS1B          | CDC28 protein kinase regulatory subunit 1B                          | -0.09 | AAGAATCTGTCATGTTAAA     | NM_001826:    | NM_001826:                               |
| 1164   | CKS2           | CDC28 protein kinase regulatory subunit 2                           | -0.49 | AAGTTGTATGTTGCATTAA     | NM_001827:    | NM_001827:                               |
| 1164   | CKS2           | CDC28 protein kinase regulatory subunit 2                           | -4.99 | CTGTAAGATGTTAAGATAAA    | NM_001827:    | NM_001827:                               |
| 1179   | CLCA1          | chloride channel, calcium activated, family member 1                | -2.94 | AAGGTCGATCTGAAATCAGAA   | NM_001285:    | NM_001285:                               |
| 1179   | CLCA1          | chloride channel, calcium activated, family member 1                | -0.87 | ATGGAACAGCTCAAGATATA    | NM_001285:    | NM_001285:                               |
| 9635   | CLCA2          | chloride channel, calcium activated, family member 2                | -1.16 | ACCATTGGCCTTCGACTACAA   | NM_006536:    | NM_006536:                               |
| 9635   | CLCA2          | chloride channel, calcium activated, family member 2                | -0.58 | CAGCAATGGGTTTGATAGGAA   | NM_006536:    | NM_006536:                               |
| 9629   | CLCA3 (chlor   | chloride channel, calcium activated, family member 3                | -2.21 | TAGGCCCGAAATGACTAGCAA   | NM_004921:    | NM_004921:                               |
| 9629   | CLCA3 (chlor   | chloride channel, calcium activated, family member 3                | 0.40  | GAGAGCTAGATTATAAGAATA   | NM_004921:    | NM_004921:                               |
| 22802  | CLCA4          | chloride channel, calcium activated, family member 4                | 0.08  | CACCATTGAACCTTAAACGAA   | NM_012128:    | NM_012128:                               |
| 22802  | CLCA4          | chloride channel, calcium activated, family member 4                | 0.09  | AAGTTCAACGTTATATCATAA   | NM_012128:    | NM_012128:                               |
| 23529  | CLCF1          | cardiotrophin-like cytokine factor 1                                | 0.41  | ACAGGATTTCTGAAAGTTTA    | NM_013246:    | NM_013246:                               |
| 23529  | CLCF1          | cardiotrophin-like cytokine factor 1                                | 0.02  | TCGAATTTGCTCCAGTATTA    | NM_013246:    | NM_013246:                               |
| 1180   | CLCN1          | chloride channel 1, skeletal muscle (Thomsen disease, autosomal dor | -0.01 | CAGCTGTGATTTGCTCGAAT    | NM_000083:    | NM_000083:                               |
| 1180   | CLCN1          | chloride channel 1, skeletal muscle (Thomsen disease, autosomal dor | -0.59 | CAGTACTTTGTTGACAAACA    | NM_000083:    | NM_000083:                               |
| 1181   | CLCN2          | chloride channel 2                                                  | 0.00  | CTCATTGGAATCGTTACTCTA   | NM_004366:    | NM_004366:                               |
| 1181   | CLCN2          | chloride channel 2                                                  | -4.79 | CGGAATCAAGAAACTGCCTTA   | NM_004366:    | NM_004366:                               |
| 1182   | CLCN3          | chloride channel 3                                                  | 0.62  | TTGAATTGAGCCATCTATAAA   | NM_001829:    | NM_173872:NM_001829:                     |
| 1182   | CLCN3          | chloride channel 3                                                  | -1.05 | CAGAAAGTCCTCGCCATTGA    | NM_001829:    | NM_173872:NM_001829:                     |
| 1183   | CLCN4          | chloride channel 4                                                  | 1.00  | AAGGCTGATGTTTGAACCTTA   | NM_001830:    | NM_001830:                               |
| 1183   | CLCN4          | chloride channel 4                                                  | 0.68  | CGGCTGTGGATGACATTCCA    | NM_001830:    | NM_001830:                               |
| 1184   | CLCN5          | chloride channel 5 (nephrolithiasis 2, X-linked, Dent disease)      | 0.85  | ATCCTGTTCTGTTACAATA     | NM_000084:    | NM_000084:                               |
| 1184   | CLCN5          | chloride channel 5 (nephrolithiasis 2, X-linked, Dent disease)      | -4.55 | AAGGATGTTTAAAGCATATA    | NM_000084:    | NM_000084:                               |
| 1185   | CLCN6          | chloride channel 6                                                  | 0.31  | CGGTTGAATGTTATTGGAATT   | NM_001286:    | NM_021737:NM_021735:NM_021736:NM_001286: |
| 1185   | CLCN6          | chloride channel 6                                                  | 0.01  | TCAGATTACGCTACCCCTAA    | NM_001286:    | NM_021737:NM_021735:NM_021736:NM_001286: |
| 1186   | CLCN7          | chloride channel 7                                                  | -0.38 | CCAGCTCATGTTCTCCTAAA    | NM_001287:    | NM_001287:                               |
| 1186   | CLCN7          | chloride channel 7                                                  | 0.54  | CTGGCTGACCATGTTTGCAGAA  | NM_001287:    | NM_001287:                               |
| 1187   | CLCNKA         | chloride channel Ka                                                 | 0.18  | TTGGCATAACAGGCAACTCTA   | NM_004070:    | NM_004070:                               |
| 1187   | CLCNKA         | chloride channel Ka                                                 | -1.89 | CTGAGTGTGAGAGATGGAAA    | NM_004070:    | NM_004070:                               |
| 1188   | CLCNKB         | chloride channel Kb                                                 | -0.01 | AACAATAGTGGTTCAGCTCCAA  | NM_000085:    | NM_000085:                               |
| 1188   | CLCNKB         | chloride channel Kb                                                 | -0.98 | CGGCTCCTGGCGGCTTCCAA    | NM_000085:    | NM_000085:                               |
| 23562  | CLDN14         | claudin 14                                                          | 4.58  | CACGGCCGCTGCTCACTGAA    | NM_012130:    | NM_012130:NM_144492:                     |
| 23562  | CLDN14         | claudin 14                                                          | 0.44  | CGGTTACAGGCTGAACGACTA   | NM_012130:    | NM_012130:NM_144492:                     |
| 10686  | CLDN16         | claudin 16                                                          | 1.32  | TAGAATTCATATTGAATTA     | NM_006580:    | NM_006580:                               |
| 10686  | CLDN16         | claudin 16                                                          | 0.63  | CAGTATGTTACATTGATAAA    | NM_006580:    | NM_006580:                               |
| 1365   | CLDN3          | claudin 3                                                           | -0.62 | CACGCCACCAAGTCTGCTTA    | NM_001306:    | NM_001306:                               |
| 1365   | CLDN3          | claudin 3                                                           | -1.96 | CACCATTATCCGGGACTTCTA   | NM_001306:    | NM_001306:                               |
| 1364   | CLDN4          | claudin 4                                                           | -3.86 | CAGAGCCATATAACTGCTCAA   | NM_001305:    | NM_001305:                               |
| 1364   | CLDN4          | claudin 4                                                           | -2.45 | ACGGCCGACAAACATCCTCAA   | NM_001305:    | NM_001305:                               |
| 6320   | CLEC11A        | C-type lectin domain family 11, member A                            | -1.25 | AAGCATCTGCAGGAAGCCCTA   | NM_002975:    | NM_002975:                               |
| 6320   | CLEC11A        | C-type lectin domain family 11, member A                            | -1.10 | CCCTGAGGACATCGTCACTTA   | NM_002975:    | NM_002975:                               |
| 160364 | CLEC12A        | C-type lectin domain family 12, member A                            | -2.06 | ACGCACCTGACCTAAATAACA   | NM_138337:    | NM_201623:NM_138337:NM_201625:           |
| 160364 | CLEC12A        | C-type lectin domain family 12, member A                            | 0.44  | TTGGTACAGTAGGTTTATAAA   | NM_138337:    | NM_201623:NM_138337:NM_201625:           |
| 51267  | CLEC1A         | C-type lectin domain family 1, member A                             | 0.39  | TGGGTTATGACGACTATTATA   | NM_016511:    | NM_016511:                               |
| 51267  | CLEC1A         | C-type lectin domain family 1, member A                             | 1.08  | CTGAAGTGTTCATATTATAA    | NM_016511:    | NM_016511:                               |
| 51266  | CLEC1B         | C-type lectin domain family 1, member B                             | 0.16  | AGGGCTTTATTGACAATAAA    | NM_016509:    | NM_016509:                               |
| 51266  | CLEC1B         | C-type lectin domain family 1, member B                             | -0.02 | CTGACAGATACTGAAATTGTA   | NM_016509:    | NM_016509:                               |
| 9976   | CLEC2B         | C-type lectin domain family 2, member B                             | -2.33 | ACGTGTCAGGCTACACATAAA   | NM_005127:    | NM_005127:                               |
| 9976   | CLEC2B         | C-type lectin domain family 2, member B                             | -0.16 | CAGCTAGATGTTACACCGGAA   | NM_005127:    | NM_005127:                               |
| 29121  | CLEC2D         | C-type lectin domain family 2, member D                             | 0.15  | CAGGAGAGTGTGCTATTGTA    | NM_001004419: | NM_013269:NM_001004420:NM_001004419:     |
| 29121  | CLEC2D         | C-type lectin domain family 2, member D                             | -1.11 | TAGAAGCATATTGGAACTGAT   | NM_001004419: | NM_013269:NM_001004420:NM_001004419:     |
| 50856  | CLEC4A         | C-type lectin domain family 4, member A                             | -3.79 | TAGAATTTAGGTTGCTGTCA    | NM_016184:    | NM_194448:NM_016184:NM_194450:NM_194447: |
| 50856  | CLEC4A         | C-type lectin domain family 4, member A                             | -0.12 | AAGGGAGTCCATAGAAATTTA   | NM_016184:    | NM_194448:NM_016184:NM_194450:NM_194447: |
| 170482 | CLEC4C         | C-type lectin domain family 4, member C                             | -1.93 | TTCAAGTCTAGTTGCTACTTTA  | NM_203503:    | NM_203503:NM_130441:                     |
| 170482 | CLEC4C         | C-type lectin domain family 4, member C                             | -1.45 | ATGGAAGAAAGGACATAGAA    | NM_203503:    | NM_203503:NM_130441:                     |
| 338339 | CLEC4D         | C-type lectin domain family 4, member D                             | 0.07  | ATGGAAGAAATAGCGTAATAA   | NM_080387:    | NM_080387:                               |
| 338339 | CLEC4D         | C-type lectin domain family 4, member D                             | -0.79 | CAGAGTATTCTGGCATAAGAA   | NM_080387:    | NM_080387:                               |
| 26253  | CLEC4E         | C-type lectin domain family 4, member E                             | 0.05  | CCGAGTCCAATAGTCAATTTA   | NM_014358:    | NM_014358:                               |
| 26253  | CLEC4E         | C-type lectin domain family 4, member E                             | 0.63  | TCCCTGAATCTTACCAACAAA   | NM_014358:    | NM_014358:                               |
| 165530 | CLEC4F         | C-type lectin domain family 4, member F                             | -1.02 | CTGCTTCACTTAAACAGTATA   | NM_173535:    | NM_173535:                               |
| 165530 | CLEC4F         | C-type lectin domain family 4, member F                             | -0.14 | CACGTGCTAAGCAGAGGCTTA   | NM_173535:    | NM_173535:                               |
| 339390 | CLEC4G         | C-type lectin superfamily 4, member G                               | -0.18 | CTGAGGAAGCATCAATAAATA   | NM_198492:    | NM_198492:                               |
| 339390 | CLEC4G         | C-type lectin superfamily 4, member G                               | 0.24  | CACGCTGAGGAAGCATCAATA   | NM_198492:    | NM_198492:                               |
| 10332  | CLEC4M         | C-type lectin domain family 4, member M                             | -2.10 | CCCAACAATAGCGGGATGAA    | NM_014257:    | NM_214679:NM_214677:NM_214678:NM_214676: |
| 10332  | CLEC4M         | C-type lectin domain family 4, member M                             | 0.21  | TCGATGTGACGTTGACAATAA   | NM_014257:    | NM_214679:NM_214677:NM_214678:NM_214676: |
| 23601  | CLEC5A         | C-type lectin domain family 5, member A                             | 0.74  | ACCTTAGACTCAGCAACAAA    | NM_013252:    | NM_013252:                               |
| 23601  | CLEC5A         | C-type lectin domain family 5, member A                             | 0.39  | CACGGAATAAGCACATAGTAA   | NM_013252:    | NM_013252:                               |
| 64581  | CLEC7A         | C-type lectin domain family 7, member A                             | -1.43 | TAGCAGTATATCAGTTATGAA   | NM_022570:    | NM_197953:NM_197952:NM_197951:NM_197950: |
| 64581  | CLEC7A         | C-type lectin domain family 7, member A                             | 1.57  | ATGGAATATCATCCTGATTTA   | NM_022570:    | NM_197949:NM_197947:NM_022570:NM_197948: |
| 1192   | CLIC1          | chloride intracellular channel 1                                    | 1.63  | AAACCCAGCACTCAATGACAA   | NM_001288:    | NM_197948:                               |
| 1192   | CLIC1          | chloride intracellular channel 1                                    | -0.23 | AAGGTGCTCTCAGAGGAAGT    | NM_001288:    | NM_001288:                               |
| 1193   | CLIC2          | chloride intracellular channel 2                                    | 0.65  | CCCGTGAAGAAATTTACCACA   | NM_001289:    | NM_001289:                               |
| 1193   | CLIC2          | chloride intracellular channel 2                                    | 0.24  | CACAATGCCTATGCCCGTAA    | NM_001289:    | NM_001289:                               |
| 9022   | CLIC3 (chloric | chloride intracellular channel 3                                    | 0.86  | AACGCTGCAGATCGAGGACTT   | NM_004669:    | NM_004669:                               |
| 9022   | CLIC3 (chloric | chloride intracellular channel 3                                    | 0.61  | AACGAGCTTTTCCACAAGTTC   | NM_004669:    | NM_004669:                               |
| 25932  | CLIC4          | chloride intracellular channel 4                                    | -1.96 | CAGGGAAGTTAGTCAAAATGAA  | NM_013943:    | NM_013943:                               |
| 25932  | CLIC4          | chloride intracellular channel 4                                    | 0.18  | TAGCAGTACAATGATTAGTAA   | NM_013943:    | NM_013943:                               |
| 53405  | CLIG5          | chloride intracellular channel 5                                    | 0.05  | AACCATGTGGTTTGAACCTTGA  | NM_016929:    | NM_016929:                               |
| 53405  | CLIG5          | chloride intracellular channel 5                                    | 0.11  | AAGGCTTCTCTCATGATCTA    | NM_016929:    | NM_016929:                               |
| 54102  | CLIG6          | chloride intracellular channel 6                                    | 1.33  | TGGTATGTTTGTGATGATATA   | NM_053277:    | NM_053277:                               |
| 54102  | CLIG6          | chloride intracellular channel 6                                    | 1.41  | ACACACAATTTTCATTATATA   | NM_053277:    | NM_053277:                               |
| 1195   | CLK1           | CDC-like kinase 1                                                   | -3.76 | AAAGCGGATATCAGAACCATA   | NM_004071:    | NM_001024646:NM_004071:                  |
| 1195   | CLK1           | CDC-like kinase 1                                                   | -6.63 | AACGTGATGAAGCAGCACCCTAA | NM_004071:    | NM_001024646:NM_004071:                  |
| 1196   | CLK2           | CDC-like kinase 2                                                   | -0.99 | CAGCTCAGACGCAACGATTA    | NM_001291:    | NM_003993:NM_001291:                     |

|        |              |                                                                          |       |                        |            |                                                                                      |
|--------|--------------|--------------------------------------------------------------------------|-------|------------------------|------------|--------------------------------------------------------------------------------------|
| 1196   | CLK2         | CDC-like kinase 2                                                        | -0.26 | TACAGCTTTGTGAAATGAAA   | XM_376585: | NM_001291.NM_003993:                                                                 |
| 1198   | CLK3         | CDC-like kinase 3                                                        | -1.69 | CACGAAGATCTCGGTCAGAAA  | NM_001292: | NM_003992.NM_001292:                                                                 |
| 1198   | CLK3         | CDC-like kinase 3                                                        | 0.69  | CTGCATTCTCTTGAGTACTA   | NM_001292: | NM_003992.NM_001292:                                                                 |
| 57396  | CLK4         | CDC-like kinase 4                                                        | 0.80  | AAGTCTGACTATGTAGTCAAA  | NM_020666: | NM_020666:                                                                           |
| 57396  | CLK4         | CDC-like kinase 4                                                        | 0.33  | TGCAAGATGTTGAATATGAA   | NM_020666: | NM_020666:                                                                           |
| 1201   | CLN3         | ceroid-lipofuscinosis, neuronal 3, juvenile (Batten, Spielmeier-Vogt di  | 0.02  | AAAGGGTCTGCTGGTACAT    | NM_000086: | NM_000086:                                                                           |
| 1201   | CLN3         | ceroid-lipofuscinosis, neuronal 3, juvenile (Batten, Spielmeier-Vogt di  | -0.13 | AAGACGTGTGGTTCGGCTTTC  | NM_000086: | NM_000086:                                                                           |
| 2055   | CLN8         | ceroid-lipofuscinosis, neuronal 8 (epilepsy, progressive with mental re  | 0.94  | CCGGGACAACCTGAATGAAAT  | NM_018941: | NM_018941:                                                                           |
| 2055   | CLN8         | ceroid-lipofuscinosis, neuronal 8 (epilepsy, progressive with mental re  | 0.26  | ACCAAGGTGTATAGTAACCTA  | NM_018941: | NM_018941:                                                                           |
| 9575   | CLOCK        | clock homolog (mouse)                                                    | -0.95 | ATCCAGCAACCTGGACCTATA  | NM_004898: | NM_004898:                                                                           |
| 9575   | CLOCK        | clock homolog (mouse)                                                    | -1.16 | ATCGGCAACAAGAAGAACTAA  | NM_004898: | NM_004898:                                                                           |
| 8192   | CLPP (ClpP c | ClpP caseinolytic peptidase, ATP-dependent, proteolytic subunit homc     | 0.05  | GCCAGGAGTGGTGGCATCTTA  | NM_006012: | NM_006012:                                                                           |
| 8192   | CLPP (ClpP c | ClpP caseinolytic peptidase, ATP-dependent, proteolytic subunit homc     | -2.90 | CACGATGCAGTACATCCTCAA  | NM_006012: | NM_006012:                                                                           |
| 8218   | CLTCL1       | clathrin, heavy polypeptide-like 1                                       | -2.73 | TGGGCAATGTGCCAAGCAA    | NM_001835: | NM_007098.NM_001835:                                                                 |
| 8218   | CLTCL1       | clathrin, heavy polypeptide-like 1                                       | 1.04  | CCAGTTTGAAGACTACATGAA  | NM_001835: | NM_007098.NM_001835:                                                                 |
| 1191   | CLU          | clusterin                                                                | 1.71  | CGGGTTATATGATCTTCATA   | NM_001831: | NM_203339.NM_001831:                                                                 |
| 1191   | CLU          | clusterin                                                                | 0.72  | GCCGGTTTATGATCTTCAT    | NM_001831: | NM_203339.NM_001831:                                                                 |
| 1215   | CMA1         | chymase 1, mast cell                                                     | -0.02 | CAGATCTGCCAGGCAAAATTA  | NM_001836: | NM_001836:                                                                           |
| 1215   | CMA1         | chymase 1, mast cell                                                     | -2.52 | CACCACGATATCATGTACTA   | NM_001836: | NM_001836:                                                                           |
| 1240   | CMKLR1       | chemokine-like receptor 1                                                | 0.59  | CAGCCATAGAAGCTTTACCAA  | NM_004072: | NM_004072:                                                                           |
| 1240   | CMKLR1       | chemokine-like receptor 1                                                | 0.15  | CAGCCTTGGACTAGCAATTTA  | NM_004072: | NM_004072:                                                                           |
| 57007  | CMKOR1       | chemokine orphan receptor 1                                              | 0.45  | CACATTTGGTGTACCTTATAA  | NM_020311: | NM_020311:                                                                           |
| 57007  | CMKOR1       | chemokine orphan receptor 1                                              | -1.18 | CCGGAGATCATCTTCTCCTA   | NM_020311: | NM_020311:                                                                           |
| 51727  | CMPK         | cytidylate kinase                                                        | -1.13 | AAGTATTGTAAGTACTATAA   | NM_016308: | NM_016308:                                                                           |
| 51727  | CMPK         | cytidylate kinase                                                        | -0.03 | CGGGTATATACCTCTAGTA    | NM_016308: | NM_016308:                                                                           |
| 202333 | CMYA5        | cardiomyopathy associated 5                                              | 0.81  | TTGAGTTCTTCTTAAATTA    | NM_153610: | NM_153610:                                                                           |
| 202333 | CMYA5        | cardiomyopathy associated 5                                              | -2.60 | TAGGTGCTATACATTTTCAA   | NM_153610: | NM_153610:                                                                           |
| 1259   | CNGA1        | cyclic nucleotide gated channel alpha 1                                  | -0.05 | TCGACTCTACATAGAACCGAA  | NM_000087: | NM_000087:                                                                           |
| 1259   | CNGA1        | cyclic nucleotide gated channel alpha 1                                  | -0.62 | TCGAAGAACGGCCAAATTTAA  | NM_000087: | NM_000087:                                                                           |
| 1260   | CNGA2        | cyclic nucleotide gated channel alpha 2                                  | -0.61 | AGCACCGACTATAGACATTTA  | NM_005140: | NM_005140:                                                                           |
| 1260   | CNGA2        | cyclic nucleotide gated channel alpha 2                                  | -2.52 | TGGCGAGTACAGTATCCTTAA  | NM_005140: | NM_005140:                                                                           |
| 1261   | CNGA3        | cyclic nucleotide gated channel alpha 3                                  | 0.40  | TCCCTTGAATTGCATCCCAA   | NM_001298: | NM_001298:                                                                           |
| 1261   | CNGA3        | cyclic nucleotide gated channel alpha 3                                  | -0.08 | AAGTTTGAATGGTGTACTAA   | NM_001298: | NM_001298:                                                                           |
| 1262   | CNGA4        | cyclic nucleotide gated channel alpha 4                                  | -0.26 | TAGCATGAGCTGTGCTACTA   | XM_290552: | NM_001037329:                                                                        |
| 1258   | CNGB1        | cyclic nucleotide gated channel beta 1                                   | -9.22 | CAGAAGTTACTCGGAAGAAA   | NM_001297: | NM_001297:                                                                           |
| 1258   | CNGB1        | cyclic nucleotide gated channel beta 1                                   | -3.36 | CGCCATCGACGTGAATACAA   | NM_001297: | NM_001297:                                                                           |
| 54714  | CNGB3        | cyclic nucleotide gated channel beta 3                                   | -0.43 | TACCTTTACTAAGAATAA     | NM_019098: | NM_019098:                                                                           |
| 54714  | CNGB3        | cyclic nucleotide gated channel beta 3                                   | 0.01  | TACCTAGGATGTAACCTTAA   | NM_019098: | NM_019098:                                                                           |
| 10256  | CNKSR1       | connector enhancer of kinase suppressor of Ras 1                         | -0.76 | CGCGCGTGGTTTGTGCTCAA   | NM_006314: | NM_006314:                                                                           |
| 10256  | CNKSR1       | connector enhancer of kinase suppressor of Ras 1                         | 0.57  | CGGACTAGCTTAGTGTGCTAA  | NM_006314: | NM_006314:                                                                           |
| 154043 | CNKSR3       | CNKSR family member 3                                                    | -1.26 | CGGAGTTGTGTTACTGCTTA   | NM_173515: | NM_173515:                                                                           |
| 154043 | CNKSR3       | CNKSR family member 3                                                    | -4.29 | CGGAGTTGTGTTACTGCTTAA  | NM_173515: | NM_173515:                                                                           |
| 4850   | CNOT4        | CCR4-NOT transcription complex, subunit 4                                | 0.59  | ACCAGCGGGTTTATAATTCA   | NM_013316: | NM_013316.NM_001008225:                                                              |
| 4850   | CNOT4        | CCR4-NOT transcription complex, subunit 4                                | 1.27  | CACCAGCGGGTTTATAATTCA  | NM_013316: | NM_013316.NM_001008225:                                                              |
| 1268   | CNR1         | cannabinoid receptor 1 (brain)                                           | 0.99  | CACGTTAAAGTAGGACTATCA  | NM_016083: | NM_016083.NM_033181:                                                                 |
| 1268   | CNR1         | cannabinoid receptor 1 (brain)                                           | 1.08  | TTCCATAGTTTAAAGTACTCAA | NM_016083: | NM_016083.NM_033181:                                                                 |
| 1269   | CNR2         | cannabinoid receptor 2 (macrophage)                                      | 0.15  | AACCCTGTCTATCTATGCTCTA | NM_001841: | NM_001841:                                                                           |
| 1269   | CNR2         | cannabinoid receptor 2 (macrophage)                                      | 0.07  | TTCCGGAATCATCTACACCTA  | NM_001841: | NM_001841:                                                                           |
| 1270   | CNTF         | ciliary neurotrophic factor                                              | 1.54  | ACCAGTATAGACAGAAGTAA   | NM_000614: | NM_000614:                                                                           |
| 1270   | CNTF         | ciliary neurotrophic factor                                              | 0.61  | GACCAGTATAGACAGAAGTAA  | NM_000614: | NM_000614:                                                                           |
| 1271   | CNTFR        | ciliary neurotrophic factor receptor                                     | 0.68  | CTCCTATCCCACAGATTTTAA  | NM_001842: | NM_147164.NM_001842:                                                                 |
| 1271   | CNTFR        | ciliary neurotrophic factor receptor                                     | 4.49  | ACGCCGGGAAGGAGTACATTA  | NM_001842: | NM_147164.NM_001842:                                                                 |
| 8506   | CNTNAP1      | contactin associated protein 1                                           | -1.06 | CGGAATCTAATTCGCGGAGCTA | NM_003632: | NM_003632:                                                                           |
| 8506   | CNTNAP1      | contactin associated protein 1                                           | -1.33 | CGGATCACCTTCGAGGGTAA   | NM_003632: | NM_003632:                                                                           |
| 26047  | CNTNAP2      | contactin associated protein-like 2                                      | 0.79  | CACCATCAATTAAGACATATA  | NM_014141: | NM_014141:                                                                           |
| 26047  | CNTNAP2      | contactin associated protein-like 2                                      | -0.01 | ACCTCTTAGTTTAACTGAAA   | NM_014141: | NM_014141:                                                                           |
| 9382   | COG1         | component of oligomeric golgi complex 1                                  | 0.78  | ACCGATTACAGACTCTGACAA  | NM_018714: | NM_018714:                                                                           |
| 9382   | COG1         | component of oligomeric golgi complex 1                                  | 0.38  | ACGCCATGTGGGAGTACTTA   | NM_018714: | NM_018714:                                                                           |
| 22796  | COG2         | component of oligomeric golgi complex 2                                  | 0.49  | ACGCTTGACGTGATATAATA   | NM_007357: | NM_007357:                                                                           |
| 22796  | COG2         | component of oligomeric golgi complex 2                                  | -0.44 | CCGGATGCATTTATGAGAAA   | NM_007357: | NM_007357:                                                                           |
| 84342  | COG8         | component of oligomeric golgi complex 8                                  | -0.01 | AAGACCTTGTCCGATTTTAA   | NM_032382: | NM_032382:                                                                           |
| 84342  | COG8         | component of oligomeric golgi complex 8                                  | -0.01 | CTGGCCTCCATCGCGCTGAA   | NM_032382: | NM_032382:                                                                           |
| 1300   | COL10A1 (co  | collagen, type X, alpha 1 (Schmid metaphyseal chondrodysplasia)          | -1.03 | AAGCCTGTTTCTAACTATGAA  | NM_000493: | NM_000493:                                                                           |
| 1300   | COL10A1 (co  | collagen, type X, alpha 1 (Schmid metaphyseal chondrodysplasia)          | -0.10 | AGCAATCTTAAAGGCTCTTTAA | NM_000493: | NM_000493:                                                                           |
| 1302   | COL11A2      | collagen, type XI, alpha 2                                               | 1.73  | CCGCAGATGGCTGGAATATTA  | NM_080679: | NM_080681.NM_080680.NM_080679:                                                       |
| 1302   | COL11A2      | collagen, type XI, alpha 2                                               | -1.14 | CCGGACAGAAAGGGCACCAAA  | NM_080679: | NM_080681.NM_080680.NM_080679:                                                       |
| 1277   | COL1A1       | collagen, type I, alpha 1                                                | -0.60 | ACCAATCACCTGCTACAGAA   | NM_000088: | NM_000088:                                                                           |
| 1277   | COL1A1       | collagen, type I, alpha 1                                                | 1.01  | CCCAAGGTTAACAGCGGTGAA  | NM_000088: | NM_000088:                                                                           |
| 1278   | COL1A2       | collagen, type I, alpha 2                                                | -3.16 | AACGGTGTGTTGGTCCACA    | NM_000089: | NM_000089:                                                                           |
| 1278   | COL1A2       | collagen, type I, alpha 2                                                | -0.01 | CGCGTTTACCCTGGCAATATT  | NM_000089: | NM_000089:                                                                           |
| 1281   | COL3A1       | collagen, type III, alpha 1 (Ehlers-Danlos syndrome type IV, autosoma    | -1.49 | CTCAAGTCTGTATATGGACAA  | NM_000090: | NM_000090:                                                                           |
| 1281   | COL3A1       | collagen, type III, alpha 1 (Ehlers-Danlos syndrome type IV, autosoma    | -5.24 | ACCGATGAGATTAAGACTTCA  | NM_000090: | NM_000090:                                                                           |
| 1285   | COL4A3 (coll | collagen, type IV, alpha 3 (Goodpasture antigen)                         | -4.03 | AGCGGATATAGAGTACTGATA  | NM_031366: | NM_031365.NM_031364.NM_031366.NM_000091:                                             |
| 1285   | COL4A3 (coll | collagen, type IV, alpha 3 (Goodpasture antigen)                         | 1.30  | TCCCAAGGTTACTTAATTTCAA | NM_031366: | NM_031365.NM_031364.NM_031366.NM_000091:                                             |
| 1286   | COL4A4       | collagen, type IV, alpha 4                                               | -0.03 | CACGCGTTCATACAAGCAT    | NM_000092: | NM_000092:                                                                           |
| 1286   | COL4A4       | collagen, type IV, alpha 4                                               | 1.42  | TTGGTTTAAAGATATCTCAA   | NM_000092: | NM_000092:                                                                           |
| 1289   | COL5A1 (coll | collagen, type V, alpha 1                                                | 0.28  | CCGACCTCCCTGTTGTGAAA   | NM_000093: | NM_000093:                                                                           |
| 1289   | COL5A1 (coll | collagen, type V, alpha 1                                                | 0.03  | TTGCGTGAAGCTCACAGAAA   | NM_000093: | NM_000093:                                                                           |
| 1290   | COL5A2       | collagen, type V, alpha 2                                                | -0.01 | CACACTAGTATATACCATTTA  | NM_000393: | NM_000393:                                                                           |
| 1290   | COL5A2       | collagen, type V, alpha 2                                                | 0.01  | TAGGTTTAAAGTACCAATGA   | NM_000393: | NM_000393:                                                                           |
| 1293   | COL6A3       | collagen, type VI, alpha 3                                               | -0.57 | CACCACTAAGCCATGGTTTAA  | NM_004369: | NM_057164.NM_057167.NM_057166.NM_004369:                                             |
| 1293   | COL6A3       | collagen, type VI, alpha 3                                               | 0.65  | AACGACGTCTTCTTCAAATTA  | NM_004369: | NM_057165:                                                                           |
| 1294   | COL7A1       | collagen, type VII, alpha 1 (epidermolysis bullosa, dystrophic, dominar  | -2.58 | AAGGGTGAACAAGGAGACTCA  | NM_000094: | NM_000094:                                                                           |
| 1294   | COL7A1       | collagen, type VII, alpha 1 (epidermolysis bullosa, dystrophic, dominar  | -1.93 | CCGGCAGCAATGGTACACCAA  | NM_000094: | NM_000094:                                                                           |
| 1295   | COL8A1       | collagen, type VIII, alpha 1                                             | -0.32 | CAGGATATTTTATGATCCCA   | NM_001850: | NM_001850:                                                                           |
| 1295   | COL8A1       | collagen, type VIII, alpha 1                                             | 0.08  | CAGTTGGAAGTTATATGTTAA  | NM_001850: | NM_020351.NM_001850:                                                                 |
| 1296   | COL8A2       | collagen, type VIII, alpha 2                                             | 0.35  | CTGACTAGCTTTGATAACAAA  | NM_005202: | NM_005202:                                                                           |
| 1296   | COL8A2       | collagen, type VIII, alpha 2                                             | 0.79  | TAACTTGTATAGGAAGCTTA   | NM_005202: | NM_005202:                                                                           |
| 1297   | COL9A1       | collagen, type IX, alpha 1                                               | 2.07  | CACCTCCCTTGAACAAATTTA  | NM_001851: | NM_001851.NM_078485:                                                                 |
| 1297   | COL9A1       | collagen, type IX, alpha 1                                               | 0.21  | CAGCATGATTACAATGTATTA  | NM_001851: | NM_001851.NM_078485:                                                                 |
| 1298   | COL9A2       | collagen, type IX, alpha 2                                               | 2.59  | CAGGATATGGAGTTACTCTA   | NM_001852: | NM_001852:                                                                           |
| 1298   | COL9A2       | collagen, type IX, alpha 2                                               | 1.16  | CCAGGCCCTTCTGTAATAATA  | NM_001852: | NM_001852:                                                                           |
| 8292   | COLQ         | collagen-like tail subunit (single strand of homotrimer) of asymmetric ε | -6.54 | AAGGACAAATCTCGTACTA    | NM_005677: | NM_080540.NM_080538.NM_080541.NM_080544:<br>NM_080539.NM_005677.NM_080543.NM_080542: |

|        |         |                                                                          |       |                        |               |                                          |
|--------|---------|--------------------------------------------------------------------------|-------|------------------------|---------------|------------------------------------------|
| 8292   | COLQ    | collagen-like tail subunit (single strand of homotrimer) of asymmetric ε | -1.15 | AAGAAGCGTGGTGGCCACAAA  | NM_005677:    | NM_080540:NM_080538:NM_080541:NM_080544: |
| 28991  | COMMD5  | COMMD domain containing 5                                                | 0.61  | TAGGCTGAAGTCCTAACTTGA  | NM_014066:    | NM_005677:NM_080543:NM_080542:           |
| 28991  | COMMD5  | COMMD domain containing 5                                                | -1.44 | CACCTATTGATAGCAATGAA   | NM_014066:    | NM_014066:                               |
| 1311   | COMP    | cartilage oligomeric matrix protein                                      | -3.96 | CACGGTCCAGGATGACGACTA  | NM_000095:    | NM_000095:                               |
| 1311   | COMP    | cartilage oligomeric matrix protein                                      | -4.01 | AAGGGAGATCGTGACAGCAAT  | NM_000095:    | NM_000095:                               |
| 1312   | COMT    | (catechol-O-methyltransferase)                                           | -1.45 | CTGGTATAGTATATTATCTTA  | NM_000754:    | NM_000754:NM_007310:                     |
| 1312   | COMT    | (catechol-O-methyltransferase)                                           | -1.24 | CGGGTGTGTCTAAATGCGAA   | NM_000754:    | NM_000754:NM_007310:                     |
| 118881 | COMTD1  | catechol-O-methyltransferase domain containing 1                         | -0.38 | CGAGTGTGTGGCAACCTAA    | NM_144589:    | NM_144589:                               |
| 118881 | COMTD1  | catechol-O-methyltransferase domain containing 1                         | 0.04  | CACCTTGGCCTCAAGATCTA   | NM_144589:    | NM_144589:                               |
| 9276   | COPB2   | coatamer protein complex, subunit beta 2 (beta prime)                    | -4.81 | ACGATTTCCAGAGATGCGAA   | NM_004766:    | NM_004766:                               |
| 9276   | COPB2   | coatamer protein complex, subunit beta 2 (beta prime)                    | -6.70 | CAGGTTTCAAGGGTATGAA    | NM_004766:    | NM_004766:                               |
| 22820  | COPG    | coatamer protein complex, subunit gamma                                  | -1.61 | CGAGCCACCTTCTACCTAAA   | NM_016128:    | NM_016128:                               |
| 22820  | COPG    | coatamer protein complex, subunit gamma                                  | -3.29 | CACCGACTCCACTATGTTGAA  | NM_016128:    | NM_016128:                               |
| 9318   | COPS2   | COP9 constitutive photomorphogenic homolog subunit 2 (Arabidopsis)       | -0.15 | AACGTACAACATCATAGTAAT  | NM_004236:    | NM_004236:                               |
| 9318   | COPS2   | COP9 constitutive photomorphogenic homolog subunit 2 (Arabidopsis)       | 0.12  | ATCCATTAATCTATTCTTGA   | NM_004236:    | NM_004236:                               |
| 10987  | COP55   | COP9 constitutive photomorphogenic homolog subunit 5 (Arabidopsis)       | -1.42 | TAGGACATCCCAAGGCTA     | NM_006837:    | NM_006837:                               |
| 10987  | COP55   | COP9 constitutive photomorphogenic homolog subunit 5 (Arabidopsis)       | 0.01  | CGCCTTAGGACATACCCAAA   | NM_006837:    | NM_006837:                               |
| 10980  | COP56   | COP9 constitutive photomorphogenic homolog subunit 6 (Arabidopsis)       | 1.46  | CCCAACCTATAAACATGATA   | NM_006833:    | NM_006833:                               |
| 10980  | COP56   | COP9 constitutive photomorphogenic homolog subunit 6 (Arabidopsis)       | 0.09  | CCAGTTTGTGAACAAGTTCAA  | NM_006833:    | NM_006833:                               |
| 51805  | COQ3    | coenzyme Q3 homolog, methyltransferase (yeast)                           | -5.35 | CTGGAATCAAATGGTGTGCTCA | NM_017421:    | NM_017421:                               |
| 51805  | COQ3    | coenzyme Q3 homolog, methyltransferase (yeast)                           | -0.25 | AACCATATGGTTCAAACTCCTA | NM_017421:    | NM_017421:                               |
| 84274  | COQ5    | coenzyme Q5 homolog, methyltransferase (yeast)                           | -1.79 | AAGCTGGAAGTCAAGGATAA   | XM_495935:    | NM_032314:                               |
| 84274  | COQ5    | coenzyme Q5 homolog, methyltransferase (yeast)                           | -1.22 | TAGGCCCAAGTCAAGATATTA  | XM_495935:    | NM_032314:                               |
| 51004  | COQ6    | coenzyme Q6 homolog, monoxygenase (yeast)                                | 0.71  | AAGATCTTTAATTTAATA     | NM_182476:    | NM_182476:NM_182480:                     |
| 51004  | COQ6    | coenzyme Q6 homolog, monoxygenase (yeast)                                | 1.64  | AAGAAGATTACGTTGATGAA   | NM_182476:    | NM_182476:NM_182480:                     |
| 57017  | COQ9    | coenzyme Q9 homolog (yeast)                                              | 1.22  | CGGGTTAATGATGCAATGAA   | NM_020312:    | NM_020312:                               |
| 57017  | COQ9    | coenzyme Q9 homolog (yeast)                                              | 0.01  | AAGGATGGCAGTGAAGTAA    | NM_020312:    | NM_020312:                               |
| 10699  | CORIN   | corin, serine peptidase                                                  | -0.19 | CAGGATTTGATGAAAGTTCAA  | NM_006587:    | NM_006587:                               |
| 10699  | CORIN   | corin, serine peptidase                                                  | 0.59  | ACCACCTTACATGAACCTCTA  | NM_006587:    | NM_006587:                               |
| 1325   | CORT    | cortistatin                                                              | 0.08  | CAGCTGGAGATTGGGCTTAAA  | NM_001302:    | NM_001302:                               |
| 1352   | COX10   | (COX COX10 homolog, cytochrome c oxidase assembly protein, heme A: fa)   | 0.54  | TAGGTAGATAACATCCAATCA  | NM_001303:    | NM_001303:                               |
| 1352   | COX10   | (COX COX10 homolog, cytochrome c oxidase assembly protein, heme A: fa)   | -1.37 | AAAGGGATTGTAGGTAGATAA  | NM_001303:    | NM_001303:                               |
| 9167   | COX7A2L | cytochrome c oxidase subunit VIIa polypeptide 2 like                     | 0.16  | AAGCCTGTGGTTTTCCACAGAA | NM_004718:    | NM_004718:                               |
| 9167   | COX7A2L | cytochrome c oxidase subunit VIIa polypeptide 2 like                     | -5.00 | CCGGAATCAAGGGTCAATGTA  | NM_004718:    | NM_004718:                               |
| 1356   | CP      | (ceruloplasmin ferroxidase)                                              | -0.23 | AAGGACCTCTACAGTGGATTA  | NM_000096:    | NM_000096:                               |
| 1356   | CP      | (ceruloplasmin ferroxidase)                                              | -2.07 | CAGGAATCAAGGGTCAATGTA  | NM_000096:    | NM_000096:                               |
| 1357   | CPA1    | carboxypeptidase A1 (pancreatic)                                         | 0.98  | CCCATCCAGGCAACCAATAA   | NM_001868:    | NM_001868:                               |
| 1357   | CPA1    | carboxypeptidase A1 (pancreatic)                                         | 0.15  | CAGCATCATCAAGGCAATTTA  | NM_001868:    | NM_001868:                               |
| 1358   | CPA2    | (carboxypeptidase A2 (pancreatic))                                       | -5.03 | CCCGTCCAAAGGATATCTGAA  | NM_001869:    | NM_001869:                               |
| 1358   | CPA2    | (carboxypeptidase A2 (pancreatic))                                       | 1.14  | TACGTGTTCTCAAAACCAAA   | NM_001869:    | NM_001869:                               |
| 1359   | CPA3    | (carboxypeptidase A3 (mast cell))                                        | 1.03  | AACGAAGTGAAGTGAAGTAA   | NM_001870:    | NM_001870:                               |
| 1359   | CPA3    | (carboxypeptidase A3 (mast cell))                                        | -1.12 | CAGTAGCACCATAACGAAGTA  | NM_001870:    | NM_001870:                               |
| 51200  | CPA4    | carboxypeptidase A4                                                      | 0.02  | CGCACTGAGGCAATGTTAAA   | NM_016352:    | NM_016352:                               |
| 51200  | CPA4    | carboxypeptidase A4                                                      | 0.82  | CAGTGGTAGATTTCAATCCAA  | NM_016352:    | NM_016352:                               |
| 93979  | CPA5    | carboxypeptidase A5                                                      | -9.13 | ATCGTGGATCCCGTTTCAAA   | NM_080385:    | NM_080385:                               |
| 93979  | CPA5    | carboxypeptidase A5                                                      | -0.87 | CCGCTTATGGCGGAAGAACAA  | NM_080385:    | NM_080385:                               |
| 1360   | CPB1    | carboxypeptidase B1 (tissue)                                             | 1.19  | CTGGGCTTATTAACATAGGTA  | NM_001871:    | NM_001871:                               |
| 1360   | CPB1    | carboxypeptidase B1 (tissue)                                             | 0.01  | CCCGGGAGCTACAACAATCTA  | NM_001871:    | NM_001871:                               |
| 1361   | CPB2    | carboxypeptidase B2 (plasma, carboxypeptidase U)                         | -1.09 | CTGCGGAGCGTTACATCAAA   | NM_001872:    | NM_001872:                               |
| 1361   | CPB2    | carboxypeptidase B2 (plasma, carboxypeptidase U)                         | 0.03  | TTCCATATTCCTATACACGAA  | NM_001872:    | NM_001872:NM_016413:                     |
| 1362   | CPD     | (carboxypeptidase D)                                                     | 0.40  | CGGGTCAATCTAATATTAGA   | NM_001304:    | NM_001304:                               |
| 1362   | CPD     | (carboxypeptidase D)                                                     | -1.18 | CAGCCAGTGGCCAAATAAA    | NM_001304:    | NM_001304:                               |
| 1363   | CPE     | (carboxypeptidase E)                                                     | 0.07  | TAGTCGTTAACTACTTAA     | NM_001873:    | NM_001873:                               |
| 1363   | CPE     | (carboxypeptidase E)                                                     | -0.89 | CTGGAGTGTGAGCACTCTA    | NM_001873:    | NM_001873:                               |
| 10815  | CPLX1   | complexin 1                                                              | 0.77  | CACGGCCGTTCACTCTAA     | NM_006651:    | NM_006651:                               |
| 10815  | CPLX1   | complexin 1                                                              | -0.73 | AACGTTAGACTGCAATACTAA  | NM_006651:    | NM_006651:                               |
| 10814  | CPLX2   | complexin 2                                                              | -2.08 | CAGATAGGTAGCAGAGACCAA  | NM_001008220: | NM_006650:NM_001008220:                  |
| 10814  | CPLX2   | complexin 2                                                              | -1.87 | CAGGTGCTTCAGATGAGCAA   | NM_001008220: | NM_006650:NM_001008220:                  |
| 1368   | CPM     | (carboxypeptidase M)                                                     | -3.35 | TAGGTCTTATGCGTAGGCAA   | NM_001874:    | NM_001005502:NM_198320:NM_001874:        |
| 1368   | CPM     | (carboxypeptidase M)                                                     | 1.06  | CAACTGGTTGATGTTCAATAA  | NM_001874:    | NM_001005502:NM_198320:NM_001874:        |
| 1369   | CPN1    | carboxypeptidase N, polypeptide 1, 50kD                                  | 0.02  | AAGACTTTAATTTCTCCATA   | NM_001308:    | NM_001308:                               |
| 1369   | CPN1    | carboxypeptidase N, polypeptide 1, 50kD                                  | -0.10 | CAAGGGAAATGCAAGACTTTAA | NM_001308:    | NM_001308:                               |
| 131034 | CPNE4   | copine IV                                                                | 0.10  | AATGTTGATAGCAAAATATA   | NM_130808:    | NM_130808:                               |
| 131034 | CPNE4   | copine IV                                                                | -0.49 | CACCAAGGAGGCATCGCAATA  | NM_130808:    | NM_130808:                               |
| 130749 | CPO     | carboxypeptidase O                                                       | 0.10  | CTGGATGATGTTGATGCGAAA  | NM_173077:    | NM_173077:                               |
| 130749 | CPO     | carboxypeptidase O                                                       | -2.49 | CAGCAATGCAATTGAAGCAA   | NM_173077:    | NM_173077:                               |
| 1371   | CPOX    | coproporphyrinogen oxidase                                               | 0.44  | ATCCCTGAATTCGATACTTA   | NM_000097:    | NM_000097:                               |
| 1371   | CPOX    | coproporphyrinogen oxidase                                               | 0.42  | CCAAGTATTGATGAAGGGAA   | NM_000097:    | NM_000097:                               |
| 1373   | CPS1    | (carbamoyl-phosphate synthetase 1, mitochondrial)                        | -2.99 | CAGGAGTACAGTGTGCGAAA   | NM_001875:    | NM_001875:                               |
| 1373   | CPS1    | (carbamoyl-phosphate synthetase 1, mitochondrial)                        | -0.36 | TACGGATGTGCCACCCATCTA  | NM_001875:    | NM_001875:                               |
| 1374   | CPT1A   | carnitine palmitoyltransferase 1A (liver)                                | 0.86  | CAGCAAGCACATCGTCTGTA   | NM_001876:    | NM_001031847:NM_001876:                  |
| 1374   | CPT1A   | carnitine palmitoyltransferase 1A (liver)                                | -0.02 | CGGGAGGAAATCAACCAATT   | NM_001876:    | NM_001031847:NM_001876:                  |
| 126129 | CPT1C   | carnitine palmitoyltransferase 1C                                        | 0.11  | CGGTTCCAGAGGGTCAAGGAA  | NM_152359:    | NM_152359:                               |
| 126129 | CPT1C   | carnitine palmitoyltransferase 1C                                        | -1.13 | ATGGTGTTCCTTATATCTTCA  | NM_152359:    | NM_152359:                               |
| 1376   | CPT2    | carnitine palmitoyltransferase II                                        | 0.21  | TGGGACTAGATCACAACTGAA  | NM_000098:    | NM_000098:                               |
| 1376   | CPT2    | carnitine palmitoyltransferase II                                        | 0.02  | CAGCTACAGGCTTGAGCTTAA  | NM_000098:    | NM_000098:                               |
| 54504  | CPVL    | carboxypeptidase, vitellogenin-like                                      | 1.01  | CACCGTGAATAAGACTTACAA  | NM_019029:    | NM_031311:NM_019029:                     |
| 54504  | CPVL    | carboxypeptidase, vitellogenin-like                                      | -0.20 | CGGGATTTATACAGTGCCTAA  | NM_019029:    | NM_031311:NM_019029:                     |
| 56265  | CPXM    | carboxypeptidase X (M14 family)                                          | -0.11 | GAGCATGGATCTAACCATAA   | NM_019609:    | NM_019609:                               |
| 56265  | CPXM    | carboxypeptidase X (M14 family)                                          | -0.32 | CAACCAGAGCATCGATCTTAA  | NM_019609:    | NM_019609:                               |
| 119587 | CPXM2   | carboxypeptidase X (M14 family), member 2                                | 0.52  | CAGGTTTCATCGTGGCATTAAA | NM_198148:    | NM_198148:                               |
| 119587 | CPXM2   | carboxypeptidase X (M14 family), member 2                                | -0.01 | TCCAGATTAGGCTAAATGTA   | NM_198148:    | NM_198148:                               |
| 8532   | CPZ     | carboxypeptidase Z                                                       | 0.12  | TACGCCAAGTCAATGAAGAA   | NM_003652:    | NM_001014447:NM_001014448:NM_003652:     |
| 8532   | CPZ     | carboxypeptidase Z                                                       | -5.26 | CCGGATCTCAGTCAAGGCAT   | NM_003652:    | NM_001014447:NM_001014448:NM_003652:     |
| 1378   | CR1     | complement component (3b/4b) receptor 1 (Knops blood group)              | -1.97 | CTGGAGCCAAATGGATCATT   | NM_000573:    | NM_000573:                               |
| 1378   | CR1     | complement component (3b/4b) receptor 1 (Knops blood group)              | -0.60 | CTGCATGGTGAAGCATCCCTA  | NM_000573:    | NM_000573:                               |
| 1379   | CR1L    | complement component (3b/4b) receptor 1-like                             | 1.63  | CAGTGTGTGAACGTAATCAT   | XM_114735:    | XM_114735:                               |
| 1379   | CR1L    | complement component (3b/4b) receptor 1-like                             | 0.46  | AAGGACAAGTGCACAACTGAA  | XM_114735:    | XM_114735:                               |
| 1380   | CR2     | complement component (3d/Epstein Barr virus) receptor 2                  | 0.60  | CACGCAATTTATATACAGATA  | NM_001877:    | NM_001877:NM_001006658:                  |
| 1380   | CR2     | complement component (3d/Epstein Barr virus) receptor 2                  | 0.22  | TACCTTATACGTGATATCAA   | NM_001877:    | NM_001877:NM_001006658:                  |
| 1382   | CRABP2  | cellular retinoic acid binding protein 2                                 | 1.65  | TAGCCTATACAGTTTGAATA   | NM_001878:    | NM_001878:                               |
| 1382   | CRABP2  | cellular retinoic acid binding protein 2                                 | 0.04  | CCCTGTAGCCTATACAGTTTA  | NM_001878:    | NM_001878:                               |
| 8738   | CRADD   | CASP2 and RIPK1 domain containing adaptor with death domain              | -0.05 | AGGCAGTGTCTCATATGTAA   | NM_003805:    | NM_003805:                               |
| 8738   | CRADD   | CASP2 and RIPK1 domain containing adaptor with death domain              | -0.39 | CAGGGTTCCACTAGACATTA   | NM_003805:    | NM_003805:                               |
| 57585  | CRAMP1L | Crm, cramp-like (Drosophila)                                             | 1.04  | AAGGCCACCACTGTACTGTTA  | NM_020825:    | NM_020825:                               |
| 57585  | CRAMP1L | Crm, cramp-like (Drosophila)                                             | -5.66 | CCCGACCACTGCCACCCCAA   | NM_020825:    | NM_020825:                               |
| 1384   | CRAT    | carnitine acetyltransferase                                              | 0.28  | CTGTATGATTAATGTGGAA    | NM_000755:    | NM_000755:NM_144782:NM_004003:           |
| 1384   | CRAT    | carnitine acetyltransferase                                              | 1.32  | CGCCCTGCTGATGATATTA    | NM_000755:    | NM_000755:NM_144782:NM_004003:           |

|        |        |                                                                          |       |                        |            |                                                                                                                                                                                                                                                                                |
|--------|--------|--------------------------------------------------------------------------|-------|------------------------|------------|--------------------------------------------------------------------------------------------------------------------------------------------------------------------------------------------------------------------------------------------------------------------------------|
| 23418  | CRB1   | crumbs homolog 1 (Drosophila)                                            | -2.66 | CTGCCATATGTTACATGGAA   | NM_012076: | NM_201253:NM_012076:                                                                                                                                                                                                                                                           |
| 23418  | CRB1   | crumbs homolog 1 (Drosophila)                                            | -1.94 | CTCTCCCAAAATAGTAGTAA   | NM_012076: | NM_201253:NM_012076:                                                                                                                                                                                                                                                           |
| 1385   | CREB1  | cAMP responsive element binding protein 1                                | 0.53  | AGGGCAGTGTGCTTCTTAA    | NM_004379: | NM_004379:NM_134442:                                                                                                                                                                                                                                                           |
| 1385   | CREB1  | cAMP responsive element binding protein 1                                | -2.38 | CGCATGCATAAAGTAAGTAA   | NM_004379: | NM_004379:NM_134442:                                                                                                                                                                                                                                                           |
| 1387   | CREBBP | CREB binding protein (Rubinstein-Taybi syndrome)                         | 1.05  | AACGGAGTGCCTTACATA     | NM_004380: | NM_004380:                                                                                                                                                                                                                                                                     |
| 1387   | CREBBP | CREB binding protein (Rubinstein-Taybi syndrome)                         | 0.38  | CCGATCCTGGTGAATCCAAA   | NM_004380: | NM_004380:                                                                                                                                                                                                                                                                     |
| 79174  | CRELD2 | cysteine-rich with EGF-like domains 2                                    | 1.15  | COGGACTACCCCTTAAATTA   | NM_024324: | NM_024324:                                                                                                                                                                                                                                                                     |
| 79174  | CRELD2 | cysteine-rich with EGF-like domains 2                                    | -0.02 | AAGAGCGAATATCCTGACTTA  | NM_024324: | NM_024324:                                                                                                                                                                                                                                                                     |
| 1390   | CREM   | cAMP responsive element modulator                                        | -0.43 | TGGGATCGCATTGCATACCTT  | NM_183060: | NM_182770:NM_183013:NM_182771:NM_183060:NM_182772:NM_182850:NM_182853:NM_182718:NM_182717:NM_181571:NM_182719:NM_182720:NM_182721:NM_182722:NM_182723:NM_182724:NM_182725:NM_183011:NM_182769:NM_183012:NM_183013:NM_183060:NM_181571:NM_183011:NM_183012:NM_183011:NM_183012: |
| 1390   | CREM   | cAMP responsive element modulator                                        | 0.57  | TCGCCAGCATGATGGAAGTATA | NM_183060: | NM_183011:NM_183012:                                                                                                                                                                                                                                                           |
| 1392   | CRH    | corticotropin releasing hormone                                          | 0.66  | AAGAGAATGGTGAATCTTAT   | NM_000756: | NM_000756:                                                                                                                                                                                                                                                                     |
| 1392   | CRH    | corticotropin releasing hormone                                          | 0.09  | CAGTTTGGTGTGTGAAGAGAA  | NM_000756: | NM_000756:                                                                                                                                                                                                                                                                     |
| 1394   | CRHR1  | corticotropin releasing hormone receptor 1                               | 1.35  | CAGTTTGGTGCACAGCCGCTA  | NM_004382: | NM_004382:                                                                                                                                                                                                                                                                     |
| 1394   | CRHR1  | corticotropin releasing hormone receptor 1                               | -0.07 | GCGGGTGGCTGGTATAAATAA  | NM_004382: | NM_004382:                                                                                                                                                                                                                                                                     |
| 1395   | CRHR2  | corticotropin releasing hormone receptor 2                               | -0.57 | ACGGATCAGCTCCACAGCAT   | NM_001883: | NM_001883:                                                                                                                                                                                                                                                                     |
| 1395   | CRHR2  | corticotropin releasing hormone receptor 2                               | -4.00 | CACGGCCATTGTCTAGCCTA   | NM_001883: | NM_001883:                                                                                                                                                                                                                                                                     |
| 163126 | CR2    | CREBBP/EP300 inhibitor 2                                                 | -0.03 | TAAGATGTTAACCGCTGAGTTA | NM_153232: | NM_153232:                                                                                                                                                                                                                                                                     |
| 163126 | CR2    | CREBBP/EP300 inhibitor 2                                                 | -2.81 | GTCGAAAGCATTTAATCTGTA  | NM_153232: | NM_153232:                                                                                                                                                                                                                                                                     |
| 51232  | CRIM1  | cysteine rich transmembrane BMP regulator 1 (chordin-like)               | 0.08  | GACGACTAAATCTGCCTCAA   | NM_016441: | NM_016441:                                                                                                                                                                                                                                                                     |
| 51232  | CRIM1  | cysteine rich transmembrane BMP regulator 1 (chordin-like)               | -1.24 | CAGCCAGACAATTTCTACCAA  | NM_016441: | NM_016441:                                                                                                                                                                                                                                                                     |
| 1398   | CRK    | v-crk sarcoma virus CT10 oncogene homolog (avian)                        | -4.69 | CAGCAGCTAACTAGAGTCTTA  | NM_005206: | NM_005206:NM_016823:                                                                                                                                                                                                                                                           |
| 1398   | CRK    | v-crk sarcoma virus CT10 oncogene homolog (avian)                        | -0.99 | CAGGATGTACCGGACCTTTA   | NM_005206: | NM_005206:NM_016823:                                                                                                                                                                                                                                                           |
| 1399   | CRKL   | v-crk sv-crk sarcoma virus CT10 oncogene homolog (avian)-like            | 0.46  | AAGAAACAATACTAGTACTA   | NM_005207: | NM_005207:                                                                                                                                                                                                                                                                     |
| 1399   | CRKL   | v-crk sv-crk sarcoma virus CT10 oncogene homolog (avian)-like            | -0.09 | TAGTTTATCATTAACCACTTA  | NM_005207: | NM_005207:                                                                                                                                                                                                                                                                     |
| 51755  | CRKRS  | Cdc2-related kinase, arginine/serine-rich                                | 0.26  | ACCGGATATCGGGAAGTTCAA  | NM_016507: | NM_016507:                                                                                                                                                                                                                                                                     |
| 51755  | CRKRS  | Cdc2-related kinase, arginine/serine-rich                                | 0.68  | ATCGGGATATTAAGTGTCTTA  | NM_016507: | NM_016507:                                                                                                                                                                                                                                                                     |
| 9244   | CRLF1  | cytokine receptor-like factor 1                                          | -1.79 | AACACCAACTACTCCCTCAAG  | NM_004750: | NM_004750:                                                                                                                                                                                                                                                                     |
| 9244   | CRLF1  | cytokine receptor-like factor 1                                          | -1.16 | AACGCTGGATATCTGGAGTGT  | NM_004750: | NM_004750:                                                                                                                                                                                                                                                                     |
| 64109  | CRLF2  | cytokine receptor-like factor 2                                          | -0.70 | CAGGATCCAGCTTGACATTTA  | NM_022148: | NM_022148:                                                                                                                                                                                                                                                                     |
| 64109  | CRLF2  | cytokine receptor-like factor 2                                          | 0.30  | CACATGAGTCTCTGTGTCTCAA | NM_022148: | NM_022148:                                                                                                                                                                                                                                                                     |
| 51379  | CRLF3  | cytokine receptor-like factor 3                                          | 0.08  | CTGGTTGATGTGCTGTTGTTA  | NM_015986: | NM_015986:                                                                                                                                                                                                                                                                     |
| 51379  | CRLF3  | cytokine receptor-like factor 3                                          | 0.16  | TTGAGTAACTATAAGTTCAA   | NM_015986: | NM_015986:                                                                                                                                                                                                                                                                     |
| 54677  | CROT   | carnitine O-octanoyltransferase                                          | 2.21  | TACCCTCTATTACACACATA   | NM_021151: | NM_021151:                                                                                                                                                                                                                                                                     |
| 54677  | CROT   | carnitine O-octanoyltransferase                                          | 1.66  | AAGGGTATGAATACATTTAT   | NM_021151: | NM_021151:                                                                                                                                                                                                                                                                     |
| 9282   | CRSP2  | cofactor required for Sp1 transcriptional activation, subunit 2, 150kDa  | -5.48 | CACGACAAGGTGAATGCACAA  | NM_004229: | NM_004229:                                                                                                                                                                                                                                                                     |
| 9282   | CRSP2  | cofactor required for Sp1 transcriptional activation, subunit 2, 150kDa  | -2.11 | CACGTTTACATGACATAGAA   | NM_004229: | NM_004229:                                                                                                                                                                                                                                                                     |
| 9439   | CRSP3  | cofactor required for Sp1 transcriptional activation, subunit 3, 130kDa  | 0.17  | AAGGGTGTTCGAGATCTCTTA  | NM_015979: | NM_015979:NM_004830:                                                                                                                                                                                                                                                           |
| 9439   | CRSP3  | cofactor required for Sp1 transcriptional activation, subunit 3, 130kDa  | 0.67  | CGCGCATTTCTCAAAGGAAA   | NM_015979: | NM_015979:NM_004830:                                                                                                                                                                                                                                                           |
| 9440   | CRSP6  | cofactor required for Sp1 transcriptional activation, subunit 6, 77kDa   | 0.24  | CAGCCTACTCTAAATTTATTA  | NM_004268: | NM_004268:                                                                                                                                                                                                                                                                     |
| 9440   | CRSP6  | cofactor required for Sp1 transcriptional activation, subunit 6, 77kDa   | -0.30 | CAGGTACATGCAGTTACAGCAA | NM_004268: | NM_004268:                                                                                                                                                                                                                                                                     |
| 9441   | CRSP7  | cofactor required for Sp1 transcriptional activation, subunit 7, 70kDa   | -0.17 | ATCAACGACGTCGCGAAGAAA  | NM_004831: | NM_004831:                                                                                                                                                                                                                                                                     |
| 9441   | CRSP7  | cofactor required for Sp1 transcriptional activation, subunit 7, 70kDa   | -2.85 | CAGGAGCATCCATGACCTGAA  | NM_004831: | NM_004831:                                                                                                                                                                                                                                                                     |
| 9443   | CRSP9  | cofactor required for Sp1 transcriptional activation, subunit 9, 33kDa   | -0.66 | AGGCAAGTAAATTCGCTGATA  | NM_004270: | NM_004270:                                                                                                                                                                                                                                                                     |
| 9443   | CRSP9  | cofactor required for Sp1 transcriptional activation, subunit 9, 33kDa   | 0.28  | ATCAAGGAATATACGATGAA   | NM_004270: | NM_004270:                                                                                                                                                                                                                                                                     |
| 1406   | CRX    | cone-rod homeobox                                                        | 1.79  | CACAGAGTGAACAATTTAA    | NM_000554: | NM_000554:                                                                                                                                                                                                                                                                     |
| 1406   | CRX    | cone-rod homeobox                                                        | -0.54 | CGGGATGGCATCTTCGAGAAA  | NM_000554: | NM_000554:                                                                                                                                                                                                                                                                     |
| 1407   | CRY1   | cryptochrome 1 (photolyase-like)                                         | -1.88 | ATCAGCAGTTCACGATATA    | NM_004075: | NM_004075:                                                                                                                                                                                                                                                                     |
| 1407   | CRY1   | cryptochrome 1 (photolyase-like)                                         | -2.57 | CTGTTTGTGATTCGTGGACAA  | NM_004075: | NM_004075:                                                                                                                                                                                                                                                                     |
| 1408   | CRY2   | cryptochrome 2 (photolyase-like)                                         | 0.74  | CGGGCTTAACATTGAACGAA   | NM_021117: | NM_021117:                                                                                                                                                                                                                                                                     |
| 1408   | CRY2   | cryptochrome 2 (photolyase-like)                                         | 1.05  | GAGGCCATAGACAGATCTAAA  | NM_021117: | NM_021117:                                                                                                                                                                                                                                                                     |
| 1408   | CRY2   | cryptochrome 2 (photolyase-like)                                         | 1.00  | CGGGTAAACATTGAACGAA    | NM_021117: | NM_021117:                                                                                                                                                                                                                                                                     |
| 1408   | CRY2   | cryptochrome 2 (photolyase-like)                                         | 0.45  | GAGGCCATAGACAGATCTAAA  | NM_021117: | NM_021117:                                                                                                                                                                                                                                                                     |
| 1418   | CRYGA  | crystallin, gamma A                                                      | 0.68  | CCCTATCATACTAGATGCTAA  | NM_014617: | NM_014617:                                                                                                                                                                                                                                                                     |
| 1418   | CRYGA  | crystallin, gamma A                                                      | -1.20 | CCCTTTGTCCTATCATACTA   | NM_014617: | NM_014617:                                                                                                                                                                                                                                                                     |
| 1419   | CRYGB  | crystallin, gamma B                                                      | -0.90 | AAGATCTACGACAGAGATGAA  | NM_005210: | NM_005210:                                                                                                                                                                                                                                                                     |
| 1419   | CRYGB  | crystallin, gamma B                                                      | 0.83  | TAGACGAGTCTAGGATTTGTA  | NM_005210: | NM_005210:                                                                                                                                                                                                                                                                     |
| 1420   | CRYGC  | crystallin, gamma C                                                      | -0.86 | CCCAACTACCAAGGTCAACAA  | NM_020989: | NM_020989:                                                                                                                                                                                                                                                                     |
| 1420   | CRYGC  | crystallin, gamma C                                                      | 0.31  | GCGGAGAGTGGTGGATTTGTA  | NM_020989: | NM_020989:                                                                                                                                                                                                                                                                     |
| 1421   | CRYGD  | crystallin, gamma D                                                      | 0.22  | ACCGCTTCCGCTTCAATGAAA  | NM_006891: | NM_006891:                                                                                                                                                                                                                                                                     |
| 1421   | CRYGD  | crystallin, gamma D                                                      | 1.90  | TTGTTGTTCTTAATTTGGAA   | NM_006891: | NM_006891:                                                                                                                                                                                                                                                                     |
| 1429   | CRYZ   | crystal crystallin, zeta (quinone reductase)                             | 0.81  | AAGCCTACTTACCTTTATAA   | NM_001889: | NM_001889:                                                                                                                                                                                                                                                                     |
| 1429   | CRYZ   | crystal crystallin, zeta (quinone reductase)                             | 0.01  | CAAGCCTACTTACCTTTATAA  | NM_001889: | NM_001889:                                                                                                                                                                                                                                                                     |
| 9946   | CRYZL1 | crystallin, zeta (quinone reductase)-like 1                              | -0.78 | CACGTTTCTGCTGAAGCAA    | NM_005111: | NM_005111:NM_145858:                                                                                                                                                                                                                                                           |
| 9946   | CRYZL1 | crystallin, zeta (quinone reductase)-like 1                              | 0.00  | TGGGATGAACATATTCAGATA  | NM_005111: | NM_005111:NM_145858:                                                                                                                                                                                                                                                           |
| 51380  | CSAD   | cysteine sulfonic acid decarboxylase                                     | -0.27 | CTCCAACATGTATGCTGATAA  | NM_015989: | NM_015989:                                                                                                                                                                                                                                                                     |
| 51380  | CSAD   | cysteine sulfonic acid decarboxylase                                     | -1.11 | ACCAGCCAGTACACATATGAA  | NM_015989: | NM_015989:                                                                                                                                                                                                                                                                     |
| 1434   | CSE1L  | CSE1 chromosome segregation 1-like (yeast)                               | 1.16  | CACGGTTGGATATCTTAA     | NM_001316: | NM_177436:NM_001316:                                                                                                                                                                                                                                                           |
| 1434   | CSE1L  | CSE1 chromosome segregation 1-like (yeast)                               | -0.35 | CAGGATAATGTATCAAAGTA   | NM_001316: | NM_177436:NM_001316:                                                                                                                                                                                                                                                           |
| 1435   | CSF1   | colony stimulating factor 1 (macrophage)                                 | -0.18 | AAGAAATGCTTTAATGAACA   | NM_000757: | NM_000757:NM_172210:NM_172211:NM_172212:                                                                                                                                                                                                                                       |
| 1435   | CSF1   | colony stimulating factor 1 (macrophage)                                 | -0.67 | CACCATGCGCTTCAGAGATAA  | NM_000757: | NM_000757:NM_172210:NM_172211:NM_172212:                                                                                                                                                                                                                                       |
| 1436   | CSF1R  | colony stimulating factor 1 receptor, formerly McDonough feline sarco    | -1.93 | ACCTCAACCTCGATCAAGTA   | NM_005211: | NM_005211:                                                                                                                                                                                                                                                                     |
| 1436   | CSF1R  | colony stimulating factor 1 receptor, formerly McDonough feline sarco    | 0.59  | ATGAGCCAAAGTGCAGCTAAA  | NM_005211: | NM_005211:                                                                                                                                                                                                                                                                     |
| 1437   | CSF2   | colony stimulating factor 2 (granulocyte-macrophage)                     | 0.05  | ACCCAGATTATCACCTTTGAA  | NM_000758: | NM_000758:                                                                                                                                                                                                                                                                     |
| 1437   | CSF2   | colony stimulating factor 2 (granulocyte-macrophage)                     | 0.42  | GACAGAAATCAGTAATATTTA  | NM_000758: | NM_000758:                                                                                                                                                                                                                                                                     |
| 1438   | CSF2RA | colony stimulating factor 2 receptor, alpha, low-affinity (granulocyte-m | -0.06 | TCGCAATTACTTCTGGTTAA   | NM_006140: | NM_172249:NM_172247:NM_172248:NM_172245:NM_172246:NM_006140:                                                                                                                                                                                                                   |
| 1438   | CSF2RA | colony stimulating factor 2 receptor, alpha, low-affinity (granulocyte-m | 0.90  | CTCGCAATTACTTCTGGTTAA  | NM_006140: | NM_172249:NM_172247:NM_172248:NM_172245:NM_172246:NM_006140:                                                                                                                                                                                                                   |
| 1439   | CSF2RB | colony stimulating factor 2 receptor, beta, low-affinity (granulocyte-ma | -2.46 | CAGTCATTTCTGCAAGCCAA   | NM_000395: | NM_000395:                                                                                                                                                                                                                                                                     |
| 1439   | CSF2RB | colony stimulating factor 2 receptor, beta, low-affinity (granulocyte-ma | 0.69  | CCCGTCATTCAGCTCTTCAA   | NM_000395: | NM_000395:                                                                                                                                                                                                                                                                     |
| 1440   | CSF3   | colony stimulating factor 3 (granulocyte)                                | 0.58  | ACTGAACCTTCAGGATAATAA  | NM_000759: | NM_000759:NM_172219:NM_172220:                                                                                                                                                                                                                                                 |
| 1440   | CSF3   | colony stimulating factor 3 (granulocyte)                                | -1.52 | CACCTGTCACATTTGAAGTAA  | NM_000759: | NM_000759:NM_172219:NM_172220:                                                                                                                                                                                                                                                 |
| 1441   | CSF3R  | colony stimulating factor 3 receptor (granulocyte)                       | 0.00  | CAGGGATCTGCATACCTTTAA  | NM_172313: | NM_000760:NM_156038:NM_156039:NM_172313:                                                                                                                                                                                                                                       |
| 1441   | CSF3R  | colony stimulating factor 3 receptor (granulocyte)                       | -0.01 | CCAGGCGATCTGCATACCTTTA | NM_172313: | NM_000760:NM_156038:NM_156039:NM_172313:                                                                                                                                                                                                                                       |
| 1445   | CSK    | c-src tyrosine kinase                                                    | -1.76 | CCGGTACAGAATGATTTGCCA  | NM_004383: | NM_004383:                                                                                                                                                                                                                                                                     |
| 1445   | CSK    | c-src tyrosine kinase                                                    | -0.18 | TACGGCGCTTAAACCCAAA    | NM_004383: | NM_004383:                                                                                                                                                                                                                                                                     |
| 64478  | CSMD1  | CUB and Sushi multiple domains 1                                         | -3.91 | CAGGACTGATTCATAGCCATA  | NM_033225: | NM_033225:                                                                                                                                                                                                                                                                     |
| 64478  | CSMD1  | CUB and Sushi multiple domains 1                                         | -1.04 | CAGGAAGTCGAATTCACCTAA  | NM_033225: | NM_033225:                                                                                                                                                                                                                                                                     |
| 114788 | CSMD3  | CUB and Sushi multiple domains 3                                         | -0.34 | CACGGTTGCACAAATGGTATA  | NM_052900: | NM_052900:NM_198123:NM_198124:                                                                                                                                                                                                                                                 |

|        |              |                                                                          |       |                        |            |                                          |
|--------|--------------|--------------------------------------------------------------------------|-------|------------------------|------------|------------------------------------------|
| 114788 | CSMD3        | CUB and Sushi multiple domains 3                                         | -0.88 | CAGGTGTATGATGGACCAAAAT | NM_052900: | NM_052900:NM_198123:NM_198124:           |
| 1452   | CSNK1A1      | casein kinase 1, alpha 1                                                 | -2.32 | AGGGCTAAAGGCTGCAACAAA  | NM_001892: | NM_001892:NM_001025105:                  |
| 1452   | CSNK1A1      | casein kinase 1, alpha 1                                                 | -0.04 | CAAGAGTAAACATGAAAGTTTT | NM_001892: | NM_001892:NM_001025105:                  |
| 122011 | CSNK1A1L     | casein kinase 1, alpha 1-like                                            | 0.16  | CAAGAATAATGTAAGAGTAA   | NM_145203: | NM_145203:                               |
| 122011 | CSNK1A1L     | casein kinase 1, alpha 1-like                                            | -0.08 | CAGATTATCTTTGAATTTCCA  | NM_145203: | NM_145203:                               |
| 1453   | CSNK1D       | casein kinase 1, delta                                                   | -6.00 | CCGGTCTAGGATCGAAATGTT  | NM_001893: | NM_139062:NM_001893:                     |
| 1453   | CSNK1D       | casein kinase 1, delta                                                   | -1.86 | CTCCCTGACGATCCACTGTGA  | NM_001893: | NM_139062:NM_001893:                     |
| 1454   | CSNK1E       | casein kinase 1, epsilon                                                 | -2.15 | GAGCTTATCGTGGTTGTAA    | NM_001894: | NM_152221:NM_001894:                     |
| 1454   | CSNK1E       | casein kinase 1, epsilon                                                 | -3.85 | GTGGTTGTAAATTTGAAGTAA  | NM_001894: | NM_001894:                               |
| 53944  | CSNK1G1      | (c) casein kinase 1, gamma 1                                             | 0.15  | ATGGACCATCCTAGTAGGGAA  | NM_022048: | NM_022048:NM_001011664:                  |
| 53944  | CSNK1G1      | (c) casein kinase 1, gamma 1                                             | -1.05 | CCGGACAGACCAATACCTCATA | NM_022048: | NM_022048:                               |
| 1455   | CSNK1G2      | casein kinase 1, gamma 2                                                 | -0.19 | AAGAACTCTATACAAATGAA   | NM_001319: | NM_001319:                               |
| 1455   | CSNK1G2      | casein kinase 1, gamma 2                                                 | 0.95  | TAGGAAAGAATCTCTATACAA  | NM_001319: | NM_001319:                               |
| 1456   | CSNK1G3      | (c) casein kinase 1, gamma 3                                             | -0.49 | CAACATATCTTCGTTATGTA   | NM_004384: | NM_001031812:NM_004384:                  |
| 1456   | CSNK1G3      | (c) casein kinase 1, gamma 3                                             | 0.57  | TACCGCAACTTGATATGGAA   | NM_004384: | NM_001031812:NM_004384:                  |
| 1457   | CSNK2A1      | casein kinase 2, alpha 1 polypeptide                                     | -0.43 | CTGGTCGCTTACACTCTTA    | NM_001895: | NM_001895:NM_177560:NM_177559:           |
| 1459   | CSNK2A2      | casein kinase 2, alpha prime polypeptide                                 | -6.29 | CAGGAGTACAATGCTGTGTA   | NM_001896: | NM_001896:                               |
| 1459   | CSNK2A2      | casein kinase 2, alpha prime polypeptide                                 | -0.73 | CTGGGACAACTTACCGGAAA   | NM_001896: | NM_001896:                               |
| 1460   | CSNK2B       | casein kinase 2, beta polypeptide                                        | -2.31 | CAGGTCCCTCACTACCGACAA  | NM_001320: | NM_001320:                               |
| 1460   | CSNK2B       | casein kinase 2, beta polypeptide                                        | -1.59 | GTGGTGGAAATGAAATAAA    | NM_001320: | NM_001320:                               |
| 9126   | CSPG6        | chondroitin sulfate proteoglycan 6 (bamacan)                             | -0.13 | ATGGAGGATATCGAACGCCAA  | NM_005445: | NM_005445:                               |
| 9126   | CSPG6        | chondroitin sulfate proteoglycan 6 (bamacan)                             | -0.83 | GAGGACTAAGTTGGAGCTTAA  | NM_005445: | NM_005445:                               |
| 1471   | CST3         | cystatin C (amyloid angiopathy and cerebral hemorrhage)                  | -0.31 | AAAGGAAAGCATTCTGCTCT   | NM_000099: | NM_000099:                               |
| 1471   | CST3         | cystatin C (amyloid angiopathy and cerebral hemorrhage)                  | -2.99 | AAAAGCCAGCAACGACATGTA  | NM_000099: | NM_000099:                               |
| 9150   | CTDP1        | CTD (carboxy-terminal domain, RNA polymerase II, polypeptide A) phi      | -4.45 | CCGGCTGTACGACACACCCAT  | NM_004715: | NM_004715:NM_048368:                     |
| 9150   | CTDP1        | CTD (carboxy-terminal domain, RNA polymerase II, polypeptide A) phi      | -3.90 | CTCCATGCTTTGTCATATTGA  | NM_004715: | NM_004715:NM_048368:                     |
| 10106  | CTDSP2       | CTD (carboxy-terminal domain, RNA polymerase II, polypeptide A) sm       | 0.52  | CCCGGAAACAGCGGGAAGTAA  | NM_005730: | NM_005730:                               |
| 10106  | CTDSP2       | CTD (carboxy-terminal domain, RNA polymerase II, polypeptide A) sm       | -0.43 | TACGATCAGCGTGACAGAGTA  | NM_005730: | NM_005730:                               |
| 10217  | CTDSP1       | CTD (carboxy-terminal domain, RNA polymerase II, polypeptide A) sm       | -0.95 | CCAGTGAAACGTCAGCTTAAA  | NM_005808: | NM_005808:NM_001008392:                  |
| 10217  | CTDSP1       | CTD (carboxy-terminal domain, RNA polymerase II, polypeptide A) sm       | -0.16 | TACGCCAACTCTTTAGCCAAA  | NM_005808: | NM_001008392:NM_005808:                  |
| 1490   | CTGF         | connective tissue growth factor                                          | -0.24 | AACACCATAGGTAGAATGTAA  | NM_001901: | NM_001901:                               |
| 1490   | CTGF         | connective tissue growth factor                                          | 0.41  | CTGATCGTTCAAAGCATGAAA  | NM_001901: | NM_001901:                               |
| 1493   | CTLA4        | cytotoxic T-lymphocyte-associated protein 4                              | -0.84 | CAGCATTATGATGGGTCGAA   | NM_005214: | NM_005214:NM_001037631:                  |
| 1493   | CTLA4        | cytotoxic T-lymphocyte-associated protein 4                              | 0.68  | AAGCATTACTGGGATTAATA   | NM_005214: | NM_005214:NM_001037631:                  |
| 1495   | CTNNA1       | catenin (cadherin-associated protein), alpha 1, 102kDa                   | -2.23 | CACCTTGATGTCGACGCCTAT  | NM_001903: | NM_001903:                               |
| 1495   | CTNNA1       | catenin (cadherin-associated protein), alpha 1, 102kDa                   | 0.38  | GCGAATTGGGACAGAGTGTA   | NM_001903: | NM_001903:                               |
| 1496   | CTNNA2       | catenin (cadherin-associated protein), alpha 2                           | 1.90  | CCCATGAATTGAACAATTTAA  | NM_004389: | NM_004389:                               |
| 1496   | CTNNA2       | catenin (cadherin-associated protein), alpha 2                           | 0.13  | TACCATTGATTTCACTAACTA  | NM_004389: | NM_004389:                               |
| 8727   | CTNNA1L      | catenin (cadherin-associated protein), alpha-like 1                      | 0.18  | AAGTTGGGAATCCCAATTA    | NM_003798: | NM_003798:                               |
| 8727   | CTNNA1L      | catenin (cadherin-associated protein), alpha-like 1                      | 1.12  | ACGCTTATTAATCAATAAGAT  | NM_003798: | NM_003798:                               |
| 1499   | CTNNA2       | catenin (cadherin-associated protein), alpha 2                           | 1.00  | ATGGTATAGGTTAAATCAGTAA | NM_001904: | NM_001904:                               |
| 1499   | CTNNA2       | catenin (cadherin-associated protein), alpha 2                           | 0.32  | CTCGGGATGTCACAAACCGAA  | NM_001904: | NM_001904:                               |
| 56998  | CTNNA1L      | catenin (cadherin-associated protein), alpha-like 1                      | 0.90  | CACCTGTTGGCTGAAGTTAA   | NM_020248: | NM_001012329:NM_020248:                  |
| 56998  | CTNNA1L      | catenin (cadherin-associated protein), alpha-like 1                      | -0.49 | TGCGTTTATAATGGCTTAAA   | NM_020248: | NM_001012329:NM_020248:                  |
| 1500   | CTNND1       | catenin (cadherin-associated protein), delta 1                           | 0.01  | CTGGTGTGATCAACAAATCA   | NM_001331: | NM_001331:                               |
| 1500   | CTNND1       | catenin (cadherin-associated protein), delta 1                           | 1.84  | TGGGAGCTTATGCTAATTTA   | NM_001331: | NM_001331:                               |
| 1501   | CTNND2       | catenin (cadherin-associated protein), delta 2 (neural plakophilin-relat | 0.44  | TAACGTTAGAATAGTGGTTAA  | NM_001332: | NM_001332:                               |
| 1501   | CTNND2       | catenin (cadherin-associated protein), delta 2 (neural plakophilin-relat | -0.05 | AAGCGCGTTGTGATATTACAA  | NM_001332: | NM_001332:                               |
| 1497   | CTNS         | cystinosis, nephropathic                                                 | -5.98 | CACCTACTTGAGACTCACCAA  | NM_004937: | NM_004937:NM_001031681:                  |
| 1497   | CTNS         | cystinosis, nephropathic                                                 | 0.93  | CGCCATTAGCATCAATAAACCA | NM_004937: | NM_004937:NM_001031681:                  |
| 11330  | CTRC         | chymotrypsin C (caldeirin)                                               | 0.14  | ATGACTGGATCAACGAGAAA   | NM_007272: | NM_007272:                               |
| 11330  | CTRC         | chymotrypsin C (caldeirin)                                               | -2.31 | CCGGGTCCCGCTACATCGAA   | NM_007272: | NM_007272:                               |
| 1506   | CTRL         | chymotrypsin-like                                                        | -0.01 | CAACAGGTCATAGCCTACAA   | NM_001907: | NM_001907:                               |
| 1506   | CTRL         | chymotrypsin-like                                                        | 0.37  | CACACCCTAGCTGGAACCTCA  | NM_001907: | NM_001907:                               |
| 1508   | CTSB         | cathepsin B                                                              | 1.31  | CAGCATGATCTTTAATAGAA   | NM_001908: | NM_147781:NM_147782:NM_147783:NM_147780: |
| 1508   | CTSB         | cathepsin B                                                              | 0.13  | CAGGATCACTGTGGAATCGAA  | NM_001908: | NM_147781:NM_147782:NM_147783:NM_147780: |
| 1075   | CTSC         | cathepsin C                                                              | 0.09  | ATGATCTGCATCAGTTGTA    | NM_001814: | NM_001814:                               |
| 1075   | CTSC         | cathepsin C                                                              | -2.24 | CTGCAATGAAGCCCTGATGAA  | NM_001814: | NM_001814:                               |
| 1509   | CTSD         | cathepsin D (lysosomal aspartyl peptidase)                               | -1.18 | CCGAGAGACTACACGCTCAA   | NM_001909: | NM_001909:                               |
| 1509   | CTSD         | cathepsin D (lysosomal aspartyl peptidase)                               | 0.17  | TCCGAGGTGCTCAAGAACTA   | NM_001909: | NM_001909:                               |
| 1510   | CTSE (cathep | cathepsin E                                                              | -3.37 | TGGGAGATTGCACTGGATA    | NM_001910: | NM_001910:NM_148964:                     |
| 1510   | CTSE (cathep | cathepsin E                                                              | 0.23  | CCGATCCACCAAGCAAGCTTA  | NM_001910: | NM_001910:NM_148964:                     |
| 8722   | CTSF         | cathepsin F                                                              | -0.86 | CCCAATCTCCGTGGCCATCAA  | NM_003793: | NM_003793:                               |
| 8722   | CTSF         | cathepsin F                                                              | 0.04  | CACCTTTGTTGAATTTGGTA   | NM_003793: | NM_003793:                               |
| 1511   | CTSG         | cathepsin G                                                              | 0.68  | CCACAGAGTAAATAAACCAA   | NM_001911: | NM_001911:                               |
| 1511   | CTSG         | cathepsin G                                                              | -1.44 | CACAGTGTGCCAGAGCCITTA  | NM_001911: | NM_001911:                               |
| 1512   | CTSH         | cathepsin H                                                              | 1.01  | ATGGATGCTAAGCACCGTAA   | NM_004390: | NM_004390:NM_148979:                     |
| 1512   | CTSH         | cathepsin H                                                              | -0.51 | CACCGTGTCTATGACGCAAA   | NM_004390: | NM_004390:NM_148979:                     |
| 1513   | CTSK         | cathepsin K (pyncnodysostosis)                                           | 0.01  | CACGGGACTAGTTAGCTTTAA  | NM_000396: | NM_000396:                               |
| 1513   | CTSK         | cathepsin K (pyncnodysostosis)                                           | -2.30 | AGGGGTGATGCTGTACAGGTA  | NM_000396: | NM_000396:                               |
| 1514   | CTSL         | cathepsin L                                                              | 0.72  | TAGGTTTATAATTTGATTCA   | NM_001912: | NM_145918:NM_001912:                     |
| 1514   | CTSL         | cathepsin L                                                              | -0.23 | CAGTGTGTAATGTTACCTCTA  | NM_001912: | NM_145918:NM_001912:                     |
| 1515   | CTSL2        | cathepsin L2                                                             | 0.32  | AAGACTCATGCTTAATTTCTA  | NM_001333: | NM_001333:                               |
| 1515   | CTSL2        | cathepsin L2                                                             | 1.14  | AACGCTTATGTTGAAGATA    | NM_001333: | NM_001333:                               |
| 1519   | CTSO         | cathepsin O                                                              | 0.29  | TGGGAAAGATTGCAACACCAA  | NM_001334: | NM_001334:                               |
| 1519   | CTSO         | cathepsin O                                                              | 0.99  | CACAAGAATGGCCCAACCTAAA | NM_001334: | NM_001334:                               |
| 1520   | CTSS         | cathepsin S                                                              | 1.67  | AGGAATCTAATATATCGAAA   | NM_004079: | NM_004079:                               |
| 1520   | CTSS         | cathepsin S                                                              | 1.56  | TGGGATAATGCTAATATATA   | NM_004079: | NM_004079:                               |
| 1521   | CTSW         | cathepsin W (lymphopain)                                                 | -1.09 | CACCGTACCATCAACATGAA   | NM_001335: | NM_001335:                               |
| 1521   | CTSW         | cathepsin W (lymphopain)                                                 | -1.57 | CGCGTCAATAACTGTCCTCAA  | NM_001335: | NM_001335:                               |
| 1522   | CTSZ         | cathepsin Z                                                              | 1.13  | CACCATCTTATGTCACITTA   | NM_001336: | NM_001336:                               |
| 1522   | CTSZ         | cathepsin Z                                                              | -2.33 | CAGCACCTATAAGGATGGGAA  | NM_001336: | NM_001336:                               |
| 2017   | CTTN         | cortactin                                                                | -1.04 | ATGCAACTTATTGATCTGAA   | NM_005231: | NM_005231:NM_138565:                     |
| 2017   | CTTN         | cortactin                                                                | -0.49 | CACCAGGAGCATATCAACATA  | NM_005231: | NM_005231:NM_138565:                     |
| 8029   | CUBN         | cubilin (intrinsic factor-cobalamin receptor)                            | -1.70 | CCGGTTAGAATCCATGGACAA  | NM_001081: | NM_001081:                               |
| 8029   | CUBN         | cubilin (intrinsic factor-cobalamin receptor)                            | 0.26  | CAGCTGCAATTTGAAGATCGA  | NM_001081: | NM_001081:                               |
| 404093 | CUEDC1       | CUE domain containing 1                                                  | 0.33  | CCGGCGTTCCTATGGTCAAA   | NM_017949: | NM_017949:                               |
| 404093 | CUEDC1       | CUE domain containing 1                                                  | -3.76 | TACGAATCCAGAAATCTGAAA  | NM_017949: | NM_017949:                               |
| 10658  | CUGBP1       | CUG triplet repeat, RNA binding protein 1                                | -2.97 | CAGGGTCTCACCTAGCTCTA   | NM_006560: | NM_198700:NM_006560:NM_001025596:        |
| 10658  | CUGBP1       | CUG triplet repeat, RNA binding protein 1                                | 1.31  | CGGGAACCTCTGCAACAGTAT  | NM_006560: | NM_198700:NM_006560:NM_001025596:        |
| 8454   | CUL1         | cullin 1 cullin 1                                                        | 0.28  | AACGTAGTTATCAGCGATTTA  | NM_003592: | NM_003592:                               |
| 8454   | CUL1         | cullin 1 cullin 1                                                        | 0.25  | ACCACAGCACTCAAATTTAA   | NM_003592: | NM_003592:                               |
| 8453   | CUL2         | cullin 2                                                                 | 0.39  | CGGCACAATGGCCCTATTCAA  | NM_003591: | NM_003591:                               |
| 8453   | CUL2         | cullin 2                                                                 | -0.07 | TACATCGGATGATACAGATA   | NM_003591: | NM_003591:                               |
| 8452   | CUL3         | cullin 3 cullin 3                                                        | -0.10 | AACAACCTTTCTCAAACGCTA  | NM_003590: | NM_003590:                               |
| 8452   | CUL3         | cullin 3 cullin 3                                                        | 0.98  | GACGTTAAGAATGGCAGATA   | NM_003590: | NM_003590:                               |
| 8065   | CUL5         | cullin 5                                                                 | -2.41 | CAGCTGGTTATTGGAGTAAGA  | NM_003478: | NM_003478:                               |

|        |         |                                                                      |       |                        |            |                                  |
|--------|---------|----------------------------------------------------------------------|-------|------------------------|------------|----------------------------------|
| 8065   | CUL5    | culin 5                                                              | -0.15 | CAGGTTTGAATCAGTCACCTA  | NM_003478: | NM_003478:                       |
| 6376   | CX3CL1  | chemokine (C-X3-C motif) ligand 1                                    | -1.85 | CACCATCAAGCCACCAACATA  | NM_002996: | NM_002996:                       |
| 6376   | CX3CL1  | chemokine (C-X3-C motif) ligand 1                                    | -0.19 | CGGAGCTGTGGTAGTAATTC   | NM_002996: | NM_002996:                       |
| 1524   | CX3CR1  | chemokine (C-X3-C motif) receptor 1                                  | -0.36 | TAGAGTTGCAATCGTAATGTA  | NM_001337: | NM_001337:                       |
| 1524   | CX3CR1  | chemokine (C-X3-C motif) receptor 1                                  | -0.67 | TCAGATGTGGTAACTGTTAA   | NM_001337: | NM_001337:                       |
| 1525   | CXADR   | coxsackie virus and adenovirus receptor                              | 0.01  | CAGGAAGTGTACGGAATATAT  | NM_001338: | NM_001338:                       |
| 1525   | CXADR   | coxsackie virus and adenovirus receptor                              | -5.56 | CAGGTAATAGGGACTTAGCAA  | NM_001338: | NM_001338:                       |
| 2919   | CXCL1   | chemokine (C-X-C motif) ligand 1 (melanoma growth stimulating activi | 1.29  | TCGAATCGGATCATATTTAA   | NM_001511: | NM_001511:                       |
| 2919   | CXCL1   | chemokine (C-X-C motif) ligand 1 (melanoma growth stimulating activi | 1.83  | TCCAGTCATTATGTTAAATTT  | NM_001511: | NM_001511:                       |
| 3627   | CXCL10  | chemokine (C-X-C motif) ligand 10                                    | -0.88 | CTGACTTAAAGTGGCATTCGAA | NM_001565: | NM_001565:                       |
| 3627   | CXCL10  | chemokine (C-X-C motif) ligand 10                                    | -0.06 | CAGGAAGGTGAAAATATCTGA  | NM_001565: | NM_001565:                       |
| 6373   | CXCL11  | chemokine (C-X-C motif) ligand 11                                    | -0.62 | AAGACTAGTTTAAAGAAATCAA | NM_005409: | NM_005409:                       |
| 6373   | CXCL11  | chemokine (C-X-C motif) ligand 11                                    | 0.58  | CACGTTCTTACTTGTGTATT   | NM_005409: | NM_005409:                       |
| 6387   | CXCL12  | chemokine (C-X-C motif) ligand 12 (stromal cell-derived factor 1)    | -0.47 | CTGAAGAACAAACACAGACAA  | NM_000609: | NM_000609:NM_01033886:NM_199168: |
| 6387   | CXCL12  | chemokine (C-X-C motif) ligand 12 (stromal cell-derived factor 1)    | 0.27  | GTGCATTGACCCGAAGCTAAA  | NM_000609: | NM_000609:NM_01033886:NM_199168: |
| 10563  | CXCL13  | chemokine (C-X-C motif) ligand 13 (B-cell chemoattractant)           | -0.95 | ACGGAGGAGAAATTAAGTCCTA | NM_006419: | NM_006419:                       |
| 10563  | CXCL13  | chemokine (C-X-C motif) ligand 13 (B-cell chemoattractant)           | -2.01 | AAGGGTATGTACACATGTAT   | NM_006419: | NM_006419:                       |
| 9547   | CXCL14  | chemokine (C-X-C motif) ligand 14                                    | -0.04 | CCGCATTGTACTGCTGTGTTA  | NM_004887: | NM_004887:                       |
| 9547   | CXCL14  | chemokine (C-X-C motif) ligand 14                                    | -0.53 | CCCAGTATATGCCGCTTGTGA  | NM_004887: | NM_004887:                       |
| 58191  | CXCL16  | chemokine (C-X-C motif) ligand 16                                    | 1.25  | CAGCTACAGATTTGTTAA     | NM_022059: | NM_022059:                       |
| 58191  | CXCL16  | chemokine (C-X-C motif) ligand 16                                    | 0.25  | CACGTTTATGTAATCTAA     | NM_022059: | NM_022059:                       |
| 2920   | CXCL2   | chemokine (C-X-C motif) ligand 2                                     | -0.02 | CAGAGAGGTTTCGATATTTAT  | NM_002089: | NM_002089:                       |
| 2920   | CXCL2   | chemokine (C-X-C motif) ligand 2                                     | 0.02  | TCCATTATATTTATTTTAA    | NM_002089: | NM_002089:                       |
| 2921   | CXCL3   | chemokine (C-X-C motif) ligand 3                                     | 0.87  | AGGGCATAATGCCCTGTTTAA  | NM_002090: | NM_002090:                       |
| 2921   | CXCL3   | chemokine (C-X-C motif) ligand 3                                     | -0.02 | TACAAATGACATGATAATAAA  | NM_002090: | NM_002090:                       |
| 6374   | CXCL5   | chemokine (C-X-C motif) ligand 5                                     | 0.61  | CAGAGAGAGCTGGAAATGTTA  | NM_002994: | NM_002994:                       |
| 6374   | CXCL5   | chemokine (C-X-C motif) ligand 5                                     | 0.18  | CAGCATTATGTTGAGAATATA  | NM_002994: | NM_002994:                       |
| 6372   | CXCL6   | chemokine (C-X-C motif) ligand 6 (granulocyte chemotactic protein 2) | 0.49  | ACGGCTTACGCTGAGAGTAAA  | NM_002993: | NM_002993:                       |
| 6372   | CXCL6   | chemokine (C-X-C motif) ligand 6 (granulocyte chemotactic protein 2) | -1.00 | CAAGTTTGTGACCCGGGAA    | NM_002993: | NM_002993:                       |
| 4283   | CXCL9   | chemokine (C-X-C motif) ligand 9                                     | -2.54 | CAGGTAGACAGATATAACTA   | NM_002416: | NM_002416:                       |
| 4283   | CXCL9   | chemokine (C-X-C motif) ligand 9                                     | -3.46 | CCACCAGAACGCTTCTTAA    | NM_002416: | NM_002416:                       |
| 2833   | CXCR3   | chemokine (C-X-C motif) receptor 3                                   | -0.03 | AACAAGATCGTCAGGACCAAA  | NM_001504: | NM_001504:                       |
| 2833   | CXCR3   | chemokine (C-X-C motif) receptor 3                                   | -1.44 | ACGAGAGTGACTGCTGTGTA   | NM_001504: | NM_001504:                       |
| 7852   | CXCR4   | chemokine (C-X-C motif) receptor 4                                   | 0.00  | CAGCTGTTATGCATAGATAA   | NM_003467: | NM_001008540:NM_003467:          |
| 7852   | CXCR4   | chemokine (C-X-C motif) receptor 4                                   | 0.56  | TCCAGCTAACACAGATGATAA  | NM_003467: | NM_001008540:NM_003467:          |
| 10663  | CXCR6   | chemokine (C-X-C motif) receptor 6                                   | 0.01  | CAGGTGATGTCGAAGGCGCTA  | NM_006564: | NM_006564:                       |
| 10663  | CXCR6   | chemokine (C-X-C motif) receptor 6                                   | -0.66 | TCGTTTCAATGAGTGTGTTAA  | NM_006564: | NM_006564:                       |
| 80231  | CXorf21 | chromosome X open reading frame 21                                   | -1.91 | CTGGAAGTCATGTGTAATCA   | NM_025159: | NM_025159:                       |
| 80231  | CXorf21 | chromosome X open reading frame 21                                   | -0.08 | TGCGATTTACTTAAACATGAA  | NM_025159: | NM_025159:                       |
| 256643 | CXorf23 | chrchromosome X open reading frame 23                                | 0.28  | CAGGCTAAGTATCAGCGTTTA  | NM_198279: | NM_198279:                       |
| 256643 | CXorf23 | chrchromosome X open reading frame 23                                | -0.01 | TAGAGAGAACTTCCACCAAGTA | NM_198279: | NM_198279:                       |
| 79979  | CXorf34 | chromosome X open reading frame 34                                   | 1.01  | CTGATTTCTTGGAGTAGTTAA  | NM_024917: | NM_024917:                       |
| 79979  | CXorf34 | chromosome X open reading frame 34                                   | -0.34 | CGGGCTGACTTAACTTAGA    | NM_024917: | NM_024917:                       |
| 30827  | CXXC1   | CXXC finger 1 (PHD domain)                                           | -0.25 | TGGCATGAAGCTGGCAGCCAA  | NM_014593: | NM_014593:                       |
| 30827  | CXXC1   | CXXC finger 1 (PHD domain)                                           | 1.04  | TGGCAGAAAGCAGAACACAA   | NM_014593: | NM_014593:                       |
| 80319  | CXXC4   | CXXC finger 4                                                        | -1.43 | CAGCAGTTGACGGAACCCGAA  | NM_025212: | NM_025212:                       |
| 80319  | CXXC4   | CXXC finger 4                                                        | -1.78 | TTCAGGCATTTGGAAATGAA   | NM_025212: | NM_025212:                       |
| 11068  | CYB51D2 | cytochrome b-561 domain containing 2                                 | -1.44 | CACCCAGCTTGGCTATTATGAA | NM_007022: | NM_007022:                       |
| 11068  | CYB51D2 | cytochrome b-561 domain containing 2                                 | -2.81 | CAGGTGAGCAATGCCTACCTA  | NM_007022: | NM_007022:                       |
| 124936 | CYB5D2  | cytochrome b5 domain containing 2                                    | 0.68  | TGGGCAAGGCTTCAAACTTAA  | NM_144611: | NM_144611:                       |
| 124936 | CYB5D2  | cytochrome b5 domain containing 2                                    | 0.80  | ACTGGTACGATGACATATAAA  | NM_144611: | NM_144611:                       |
| 51706  | CYB5R1  | cytochrome b5 reductase 1                                            | 1.59  | AATGATTTCTTCCAGATCTCAA | NM_016243: | NM_016243:                       |
| 51706  | CYB5R1  | cytochrome b5 reductase 1                                            | -0.68 | TAGTTCCTTGATGATCCTTAA  | NM_016243: | NM_016243:                       |
| 51700  | CYB5R2  | cytochrome b5 reductase 2                                            | 0.02  | CCAGGGAATCTGGAATCAGA   | NM_016229: | NM_016229:NM_001001336:          |
| 51700  | CYB5R2  | cytochrome b5 reductase 2                                            | -0.01 | TCAGTATTGGAGAACATGAA   | NM_016229: | NM_016229:NM_001001336:          |
| 1727   | CYB5R3  | cytochrome b5 reductase 3                                            | -1.40 | CAGAGTCATTTATGAGCAGAA  | NM_000398: | NM_007326:NM_000398:             |
| 1727   | CYB5R3  | cytochrome b5 reductase 3                                            | 0.08  | CTGGAGGAAGCTCAGGAACAAA | NM_000398: | NM_007326:NM_000398:             |
| 51167  | CYB5R4  | cytochrome b5 reductase 4                                            | -0.67 | TGATCATGTTTCCATGCAAA   | NM_016230: | NM_016230:                       |
| 51167  | CYB5R4  | cytochrome b5 reductase 4                                            | -0.14 | AGGCTTCCACCAATGTTTAA   | NM_016230: | NM_016230:                       |
| 1535   | CYBA    | (cytoch)cytochrome b-245, alpha polypeptide                          | 1.36  | TTTACCAGGAATCTACTGTT   | NM_000101: | NM_000101:                       |
| 1535   | CYBA    | (cytoch)cytochrome b-245, alpha polypeptide                          | -0.29 | CTTTGGTGCCTACTCCTATTG  | NM_000101: | NM_000101:                       |
| 1536   | CYBB    | cytochrome b-245, beta polypeptide (chronic granulomatous disease)   | -5.65 | CAGGCTAAGGATACTAACCAA  | NM_000397: | NM_000397:                       |
| 1536   | CYBB    | cytochrome b-245, beta polypeptide (chronic granulomatous disease)   | 1.01  | CCAGATCATTAGGACATAATA  | NM_000397: | NM_000397:                       |
| 1537   | CYC1    | (cytoch)cytochrome c-1                                               | -0.17 | CCCATCATGGGAATAAATTA   | NM_001916: | NM_001916:                       |
| 1537   | CYC1    | (cytoch)cytochrome c-1                                               | -1.88 | TACCATGTCCAGATGAGCCAA  | NM_001916: | NM_001916:                       |
| 54205  | CYCS    | cytochrome c, somatic                                                | -1.71 | ATGATACAGGAACATATTTAA  | NM_018947: | NM_018947:                       |
| 54205  | CYCS    | cytochrome c, somatic                                                | 0.58  | CTCAACTAGAAATACACTTCA  | NM_018947: | NM_018947:                       |
| 1540   | CYLD    | cylindromatosis (turban tumor syndrome)                              | 1.74  | AAGGTTAGAACCTTTGCTAAA  | NM_015247: | NM_015247:                       |
| 1540   | CYLD    | cylindromatosis (turban tumor syndrome)                              | 0.36  | AAGTTTCATCCAGTCATAATA  | NM_015247: | NM_015247:                       |
| 1583   | CYP11A1 | cytochrome P450, family 11, subfamily A, polypeptide 1               | -1.74 | CTGAGAACTTCAGAGTTGAA   | NM_000781: | NM_000781:                       |
| 1583   | CYP11A1 | cytochrome P450, family 11, subfamily A, polypeptide 1               | 0.97  | TACTGGAAATGAGACAGAAA   | NM_000781: | NM_000781:                       |
| 1584   | CYP11B1 | cytochrome P450, family 11, subfamily B, polypeptide 1               | -1.09 | CACCTTCAGAGCCTCAACTA   | NM_000497: | NM_000497:NM_001026213:          |
| 1584   | CYP11B1 | cytochrome P450, family 11, subfamily B, polypeptide 1               | -2.62 | CAGGTGGAGACACTAACCCAA  | NM_000497: | NM_000497:NM_001026213:          |
| 1585   | CYP11B2 | cytochrome P450, family 11, subfamily B, polypeptide 2               | -0.67 | CAGTATGATCGGATCCTTAA   | NM_000498: | NM_000498:                       |
| 1585   | CYP11B2 | cytochrome P450, family 11, subfamily B, polypeptide 2               | -2.95 | CAGAGATGGCTTCTTGTTTA   | NM_000498: | NM_000498:                       |
| 1586   | CYP17A1 | cytochrome P450, family 17, subfamily A, polypeptide 1               | -3.18 | CAGGCTGAGGGTAGCACCTAA  | NM_000102: | NM_000102:                       |
| 1586   | CYP17A1 | cytochrome P450, family 17, subfamily A, polypeptide 1               | -3.22 | CGGAGTGACTTATCACCAA    | NM_000102: | NM_000102:                       |
| 1588   | CYP19A1 | cytochrome P450, family 19, subfamily A, polypeptide 1               | 1.95  | CACCACTTACTTGTGTTATA   | NM_000103: | NM_031226:NM_000103:             |
| 1588   | CYP19A1 | cytochrome P450, family 19, subfamily A, polypeptide 1               | 0.84  | CACCTTGAATTCGGTTGTTA   | NM_000103: | NM_031226:NM_000103:             |
| 1543   | CYP1A1  | cytochrome P450, family 1, subfamily A, polypeptide 1                | -0.07 | AACAACCTACCTGAGCTAAATA | NM_000499: | NM_000499:                       |
| 1543   | CYP1A1  | cytochrome P450, family 1, subfamily A, polypeptide 1                | 0.10  | AACATTGATTTAATGTAATA   | NM_000499: | NM_000499:                       |
| 1544   | CYP1A2  | cytochrome P450, family 1, subfamily A, polypeptide 2                | 0.21  | CAGCCTAATCTACATCTTAA   | NM_000761: | NM_000761:                       |
| 1544   | CYP1A2  | cytochrome P450, family 1, subfamily A, polypeptide 2                | 0.17  | CCAGCCTAACCTACATCTTAA  | NM_000761: | NM_000761:                       |
| 1545   | CYP1B1  | cytochrome P450, family 1, subfamily B, polypeptide 1                | -0.76 | CAGTGTCATGTTGATAGACAAA | NM_000104: | NM_000104:                       |
| 1545   | CYP1B1  | cytochrome P450, family 1, subfamily B, polypeptide 1                | -0.08 | AGGGCCCAATGAATTTATA    | NM_000104: | NM_000104:                       |
| 57404  | CYP20A1 | cytochrome P450, family 20, subfamily A, polypeptide 1               | -0.93 | CCAGGGATFACTCCAACCTGAA | NM_020674: | NM_177538:NM_020674:             |
| 57404  | CYP20A1 | cytochrome P450, family 20, subfamily A, polypeptide 1               | -4.85 | CAGAGTTGAGGTTGTCATATA  | NM_020674: | NM_177538:NM_020674:             |
| 1589   | CYP21A2 | cytochrome P450, family 21, subfamily A, polypeptide 2               | -2.13 | AATCCTCAAGATGCAGCCTTT  | NM_000500: | NM_000500:                       |
| 1589   | CYP21A2 | cytochrome P450, family 21, subfamily A, polypeptide 2               | -2.38 | AAGGCAAGAACTCCAGAGCTC  | NM_000500: | NM_000500:                       |
| 1591   | CYP24A1 | cytochrome P450, family 24, subfamily A, polypeptide 1               | 0.23  | TGCAATCTTATAAGACTTAA   | NM_000782: | NM_000782:                       |
| 1591   | CYP24A1 | cytochrome P450, family 24, subfamily A, polypeptide 1               | 0.79  | AAGTTAGAGATCTGTATATA   | NM_000782: | NM_000782:                       |
| 1592   | CYP26A1 | cytochrome P450, family 26, subfamily A, polypeptide 1               | -0.29 | CAGCTTATCTAACATGTCATA  | NM_000783: | NM_000783:NM_057157:             |
| 1592   | CYP26A1 | cytochrome P450, family 26, subfamily A, polypeptide 1               | -3.17 | CACCGTGTATCCTGTGGACAA  | NM_000783: | NM_000783:NM_057157:             |
| 56603  | CYP26B1 | cytochrome P450, family 26, subfamily B, polypeptide 1               | 1.34  | GCCAGATGGCTATAATTTAA   | NM_019885: | NM_019885:                       |
| 56603  | CYP26B1 | cytochrome P450, family 26, subfamily B, polypeptide 1               | -0.91 | AAGACTTGTCAAAGCTTGGAA  | NM_019885: | NM_019885:                       |
| 340665 | CYP26C1 | cytochrome P450, family 26, subfamily C, polypeptide 1               | -0.03 | CTGGAGCGTGTATGATAGCAT  | NM_183374: | NM_183374:                       |
| 340665 | CYP26C1 | cytochrome P450, family 26, subfamily C, polypeptide 1               | 0.71  | CACCTTCGAGCTGCAGCGCTA  | NM_183374: | NM_183374:                       |
| 1593   | CYP27A1 | cytochrome P450, family 27, subfamily A, polypeptide 1               | -3.25 | CCGATTTCTGCTGTTCCCAA   | NM_000784: | NM_000784:                       |
| 1593   | CYP27A1 | cytochrome P450, family 27, subfamily A, polypeptide 1               | -3.87 | CACGCTGACATGGCCCTGTA   | NM_000784: | NM_000784:                       |

|        |          |                                                                    |       |                        |            |                                |
|--------|----------|--------------------------------------------------------------------|-------|------------------------|------------|--------------------------------|
| 1594   | CYP27B1  | cytochrome P450, family 27, subfamily B, polypeptide 1             | 0.34  | CTGGTTACGGTTCTTATAA    | NM_000785: | NM_000785:                     |
| 1594   | CYP27B1  | cytochrome P450, family 27, subfamily B, polypeptide 1             | -1.53 | AACCACCATAGTGAAGTGTA   | NM_000785: | NM_000785:                     |
| 1553   | CYP2A13  | cytochrome P450, family 2, subfamily A, polypeptide 13             | 0.25  | CTACAAAGAGTAGTAATAATA  | NM_000766: | NM_000766:                     |
| 1553   | CYP2A13  | cytochrome P450, family 2, subfamily A, polypeptide 13             | 0.08  | TACAGTATGCTCAAGAGAGTA  | NM_000766: | NM_000766:                     |
| 1549   | CYP2A7   | cytochrome P450, family 2, subfamily A, polypeptide 7              | -2.46 | CAGCTTCTTCCAAACCCCTCA  | NM_000764: | NM_030589:NM_000764:           |
| 1549   | CYP2A7   | cytochrome P450, family 2, subfamily A, polypeptide 7              | -0.86 | CCTGATGATGACGACGTTGAA  | NM_000764: | NM_030589:NM_000764:           |
| 1555   | CYP2B6   | cytochrome P450, family 2, subfamily B, polypeptide 6              | 0.18  | TCAAATCTGCTGAGAATTTAA  | NM_000767: | NM_000767:                     |
| 1555   | CYP2B6   | cytochrome P450, family 2, subfamily B, polypeptide 6              | 0.72  | CCCATAAACAGAAATCATACAA | NM_000767: | NM_000767:                     |
| 1556   | CYP2B7P1 | cytochrome P450, family 2, subfamily B, polypeptide 7 pseudogene 1 | -1.17 | TTGCGATTTCAGTGGTCTTGAA | NR_001278: | NR_001278:                     |
| 1556   | CYP2B7P1 | cytochrome P450, family 2, subfamily B, polypeptide 7 pseudogene 1 | 0.06  | CTGCCAGAGTTTCTTACTCAT  | NR_001278: | NR_001278:                     |
| 1562   | CYP2C18  | cytochrome P450, family 2, subfamily C, polypeptide 18             | -0.66 | CAAGATCCAATGAACATCCAA  | NM_000772: | NM_000772:                     |
| 1562   | CYP2C18  | cytochrome P450, family 2, subfamily C, polypeptide 18             | -0.13 | CGCAGTGTCTTACTAAGAA    | NM_000772: | NM_000772:                     |
| 1557   | CYP2C19  | cytochrome P450, family 2, subfamily C, polypeptide 19             | 0.02  | CAGCTGAATTCACATTTGAA   | NM_000769: | NM_000769:                     |
| 1557   | CYP2C19  | cytochrome P450, family 2, subfamily C, polypeptide 19             | -0.01 | AACCCATAACAAATTAACCTAA | NM_000769: | NM_000769:                     |
| 1558   | CYP2C8   | cytochrome P450, family 2, subfamily C, polypeptide 8              | -0.02 | AAGTCAGAAATCAATATTGAA  | NM_000770: | NM_000770:NM_030878:           |
| 1558   | CYP2C8   | cytochrome P450, family 2, subfamily C, polypeptide 8              | 0.00  | ACGAAGTTACATTTAGGAGAA  | NM_000770: | NM_000770:NM_030878:           |
| 1559   | CYP2C9   | cytochrome P450, family 2, subfamily C, polypeptide 9              | 0.83  | TAGAGAAATATGATTTGGTGA  | NM_000771: | NM_000771:                     |
| 1559   | CYP2C9   | cytochrome P450, family 2, subfamily C, polypeptide 9              | 0.96  | TAGAGTATAATATGTTATTA   | NM_000771: | NM_000771:                     |
| 1571   | CYP2E1   | cytochrome P450, family 2, subfamily E, polypeptide 1              | 0.69  | CTGGCTCCAGCTTTACAATA   | NM_000773: | NM_000773:                     |
| 1571   | CYP2E1   | cytochrome P450, family 2, subfamily E, polypeptide 1              | -0.03 | AAGGCTGATGTATTGTTTAA   | NM_000773: | NM_000773:                     |
| 1572   | CYP2F1   | cytochrome P450, family 2, subfamily F, polypeptide 1              | -0.24 | TGCGGGCTTCCGTATACCCAA  | NM_000774: | NM_000774:                     |
| 1572   | CYP2F1   | cytochrome P450, family 2, subfamily F, polypeptide 1              | 0.57  | CACCATTAATCCGCCTTATCAA | NM_000774: | NM_000774:                     |
| 1573   | CYP2J2   | cytochrome P450, family 2, subfamily J, polypeptide 2              | 0.27  | TAAGTGGTTGTAAGCAATAA   | NM_000775: | NM_000775:                     |
| 1573   | CYP2J2   | cytochrome P450, family 2, subfamily J, polypeptide 2              | 0.48  | AAAGTCTTGTAAAGCAATAA   | NM_000775: | NM_000775:                     |
| 120227 | CYP2R1   | cytochrome P450, family 2, subfamily R, polypeptide 1              | 1.08  | TGGGTTGATCAGACAGCATTA  | NM_024514: | NM_024514:                     |
| 120227 | CYP2R1   | cytochrome P450, family 2, subfamily R, polypeptide 1              | 0.52  | TACGGAGAGATCTTCAAGTTA  | NM_024514: | NM_024514:                     |
| 29785  | CYP2S1   | cytochrome P450, family 2, subfamily S, polypeptide 1              | -0.65 | CATGCTGATGACAGTCATTA   | NM_030622: | NM_030622:                     |
| 29785  | CYP2S1   | cytochrome P450, family 2, subfamily S, polypeptide 1              | -0.13 | CACAGAAATTCACCAACAAGAA | NM_030622: | NM_030622:                     |
| 113612 | CYP2U1   | cytochrome P450, family 2, subfamily U, polypeptide 1              | 0.08  | CGGGTGTGTATGGGAGAACAA  | NM_183075: | NM_183075:                     |
| 113612 | CYP2U1   | cytochrome P450, family 2, subfamily U, polypeptide 1              | 0.05  | CGGAGGATTTCTACCCTAAT   | NM_183075: | NM_183075:                     |
| 54905  | CYP2W1   | cytochrome P450, family 2, subfamily W, polypeptide 1              | -0.77 | AAGATTCTGCAGGAGCTGAAA  | NM_017781: | NM_017781:                     |
| 54905  | CYP2W1   | cytochrome P450, family 2, subfamily W, polypeptide 1              | -3.47 | AATCGCCATCTCCAGCTCAT   | NM_017781: | NM_017781:                     |
| 51302  | CYP39A1  | cytochrome P450, family 39, subfamily A, polypeptide 1             | 0.08  | CTCCTAGGCTCTAATTAACATA | NM_016593: | NM_016593:                     |
| 51302  | CYP39A1  | cytochrome P450, family 39, subfamily A, polypeptide 1             | 0.39  | GAGGTGATTTCTCACTAGCAA  | NM_016593: | NM_016593:                     |
| 1576   | CYP3A4   | cytochrome P450, family 3, subfamily A, polypeptide 4              | -0.03 | ATGCAATGAACACTTAATAAA  | NM_017460: | NM_017460:                     |
| 1576   | CYP3A4   | cytochrome P450, family 3, subfamily A, polypeptide 4              | 0.16  | CTCGATGCAATGAACACTTAA  | NM_017460: | NM_017460:                     |
| 64816  | CYP3A43  | cytochrome P450, family 3, subfamily A, polypeptide 43             | -0.56 | AAGATGAACTACACAGAAATTA | NM_022820: | NM_057096:NM_057095:NM_022820: |
| 64816  | CYP3A43  | cytochrome P450, family 3, subfamily A, polypeptide 43             | 1.14  | CTCGATGCAATTTAATATTA   | NM_022820: | NM_057096:NM_057095:NM_022820: |
| 1577   | CYP3A5   | cytochrome P450, family 3, subfamily A, polypeptide 5              | 0.87  | CAGAGATTTCAACTTAGTCAA  | NM_000777: | NM_000777:                     |
| 1577   | CYP3A5   | cytochrome P450, family 3, subfamily A, polypeptide 5              | 0.03  | CCCTAAGTGGAGAATGAGTTA  | NM_000777: | NM_000777:                     |
| 1551   | CYP3A7   | cytochrome P450, family 3, subfamily A, polypeptide 7              | -0.02 | ATCTGTAGTATCTATAGTAA   | NM_000765: | NM_000765:                     |
| 1551   | CYP3A7   | cytochrome P450, family 3, subfamily A, polypeptide 7              | 0.40  | TTCAACCACCACTAATAATA   | NM_000765: | NM_000765:                     |
| 10858  | CYP46A1  | cytochrome P450, family 46, subfamily A, polypeptide 1             | -0.03 | GCGGATGACACACACTTTTGA  | NM_006668: | NM_006668:                     |
| 10858  | CYP46A1  | cytochrome P450, family 46, subfamily A, polypeptide 1             | -0.27 | AGGCTGGTGTCCGAATGCAA   | NM_006668: | NM_006668:                     |
| 1579   | CYP4A11  | cytochrome P450, family 4, subfamily A, polypeptide 11             | 1.80  | CAGCTGTAATTTGTGTGCTTA  | NM_000778: | NM_000778:                     |
| 1579   | CYP4A11  | cytochrome P450, family 4, subfamily A, polypeptide 11             | 1.13  | ATCAATGTATCTTGAGTTAA   | NM_000778: | NM_000778:                     |
| 1580   | CYP4B1   | cytochrome P450, family 4, subfamily B, polypeptide 1              | 1.06  | ACCAAATAGAAGAATGGCTTA  | NM_000779: | NM_000779:                     |
| 1580   | CYP4B1   | cytochrome P450, family 4, subfamily B, polypeptide 1              | -1.55 | ATGGCTGGGATCAACCAATAA  | NM_000779: | NM_000779:                     |
| 57834  | CYP4F11  | cytochrome P450, family 4, subfamily F, polypeptide 11             | 0.07  | TGCGGATCCATTAACAACCCAA | NM_021187: | NM_021187:                     |
| 57834  | CYP4F11  | cytochrome P450, family 4, subfamily F, polypeptide 11             | 1.11  | AGGCATTTGCTGCCATTTACAA | NM_021187: | NM_021187:                     |
| 66002  | CYP4F12  | cytochrome P450, family 4, subfamily F, polypeptide 12             | 0.01  | TTGAGATTTGATCAATGAATA  | NM_023944: | NM_023944:                     |
| 66002  | CYP4F12  | cytochrome P450, family 4, subfamily F, polypeptide 12             | -8.87 | CGCAGGAAGCTGGAATTTGAT  | NM_023944: | NM_023944:                     |
| 8529   | CYP4F2   | cytochrome P450, family 4, subfamily F, polypeptide 2              | 0.84  | CAGGTTGTTCAATAATAATA   | NM_001082: | NM_001082:                     |
| 8529   | CYP4F2   | cytochrome P450, family 4, subfamily F, polypeptide 2              | 0.64  | CCAGATGAAGGATAAACAATA  | NM_001082: | NM_001082:                     |
| 4051   | CYP4F3   | cytochrome P450, family 4, subfamily F, polypeptide 3              | 0.50  | CTGGTGTACAATGCTAATAATA | NM_000896: | NM_000896:                     |
| 4051   | CYP4F3   | cytochrome P450, family 4, subfamily F, polypeptide 3              | 0.75  | ATCATGTTATACGTACACTTA  | NM_000896: | NM_000896:                     |
| 11283  | CYP4F8   | cytochrome P450, family 4, subfamily F, polypeptide 8              | 0.52  | CAGAGTCTAAGTAAAGACTTT  | NM_007253: | NM_007253:                     |
| 11283  | CYP4F8   | cytochrome P450, family 4, subfamily F, polypeptide 8              | 1.22  | AGGGAATGCTGTAAACATCAA  | NM_007253: | NM_007253:                     |
| 285440 | CYP4V2   | cytochrome P450, family 4, subfamily V, polypeptide 2              | 0.72  | TGGCTGATTCATAATGGGTAA  | NM_207352: | NM_207352:                     |
| 285440 | CYP4V2   | cytochrome P450, family 4, subfamily V, polypeptide 2              | 0.13  | TAGGTTAGATCTTTAGTTAA   | NM_207352: | NM_207352:                     |
| 260293 | CYP4X1   | cytochrome P450, family 4, subfamily X, polypeptide 1              | -0.08 | ATAGATGTGATCATTCCATATA | NM_178033: | NM_178033:                     |
| 260293 | CYP4X1   | cytochrome P450, family 4, subfamily X, polypeptide 1              | 0.06  | CACCAATAGACTTTCAATATAT | NM_178033: | NM_178033:                     |
| 199974 | CYP4Z1   | cytochrome P450, family 4, subfamily Z, polypeptide 1              | 0.18  | ATGTTGTTTGCACAATTTATA  | NM_178134: | NM_178134:                     |
| 1595   | CYP51A1  | cytochrome P450, family 51, subfamily A, polypeptide 1             | -0.23 | AAGTCTTGGGAGTAATAATA   | NM_000786: | NM_000786:                     |
| 1595   | CYP51A1  | cytochrome P450, family 51, subfamily A, polypeptide 1             | -2.25 | TAGGGAATAATCGAACACTCA  | NM_000786: | NM_000786:                     |
| 1581   | CYP7A1   | cytochrome P450, family 7, subfamily A, polypeptide 1              | -0.27 | TAAGTGACTCGAGTGTTTAA   | NM_000780: | NM_000780:                     |
| 1581   | CYP7A1   | cytochrome P450, family 7, subfamily A, polypeptide 1              | 0.21  | CGGTTGTGATCATATATCAT   | NM_000780: | NM_000780:                     |
| 9420   | CYP7B1   | cytochrome P450, family 7, subfamily B, polypeptide 1              | -0.08 | CAGCCGCTGTGTTGGTAT     | NM_004820: | NM_004820:                     |
| 9420   | CYP7B1   | cytochrome P450, family 7, subfamily B, polypeptide 1              | 0.45  | TACGACTGTCTCATATTCAA   | NM_004820: | NM_004820:                     |
| 1582   | CYP8B1   | cytochrome P450, family 8, subfamily B, polypeptide 1              | -1.89 | CAGGTTGGTTCATGAAGACTA  | NM_004391: | NM_004391:                     |
| 1582   | CYP8B1   | cytochrome P450, family 8, subfamily B, polypeptide 1              | 0.16  | TTCAAGCTGATCACTATTAA   | NM_004391: | NM_004391:                     |
| 3491   | CYR61    | cysteine-rich, angiogenic inducer, 61                              | 0.04  | AGGCAGCTATCGCACTTAA    | NM_001554: | NM_001554:                     |
| 3491   | CYR61    | cysteine-rich, angiogenic inducer, 61                              | 1.98  | AAGGATTTTGCAGAACTGCCAA | NM_001554: | NM_001554:                     |
| 10800  | CYSLTR1  | cysteinyl leukotriene receptor 1                                   | 0.67  | AAAGCAGACATTCGTAGAGAA  | NM_006639: | NM_006639:                     |
| 10800  | CYSLTR1  | cysteinyl leukotriene receptor 1                                   | -0.88 | CTGTATATATTTGGCTAGCAA  | NM_006639: | NM_006639:                     |
| 57105  | CYSLTR2  | cysteinyl leukotriene receptor 2                                   | -1.24 | CAGGCTTTCTAAATTTCTCAA  | NM_020377: | NM_020377:                     |
| 57105  | CYSLTR2  | cysteinyl leukotriene receptor 2                                   | -0.86 | TGGGATCATATGGATCCTTAT  | NM_020377: | NM_020377:                     |
| 54360  | CYTL1    | cytokine-like 1                                                    | 0.12  | CTGCCAGATCGTCAGCGCTAA  | NM_018659: | NM_018659:                     |
| 54360  | CYTL1    | cytokine-like 1                                                    | -1.81 | ACAGGCTCTGTGTTAGTTGA   | NM_018659: | NM_018659:                     |
| 27065  | DS234E   | DNA segment on chromosome 4 (unique) 234 expressed sequence        | -0.96 | CCGGATAAGGTGGTCTGTGAA  | NM_014392: | NM_014392:                     |
| 27065  | DS234E   | DNA segment on chromosome 4 (unique) 234 expressed sequence        | 0.58  | AGGGTTGGATCTCAGATAAA   | NM_014392: | NM_014392:                     |
| 1601   | DAB2     | disabled homolog 2, mitogen-responsive phosphoprotein (Drosophila) | -0.77 | AAGTTGGCCCTTAGTAGTCAA  | NM_001343: | NM_001343:                     |
| 1601   | DAB2     | disabled homolog 2, mitogen-responsive phosphoprotein (Drosophila) | -2.51 | TAGAGCATGACATCCAGTAA   | NM_001343: | NM_001343:                     |
| 1603   | DAD1     | defender against cell death 1                                      | 0.50  | CAGATTTGACACTTACTGCTA  | NM_001344: | NM_001344:                     |
| 1603   | DAD1     | defender against cell death 1                                      | -1.59 | TTGCCTGAGAAATACAGATCAA | NM_001344: | NM_001344:                     |
| 1605   | DAG1     | dystroglycan 1 (dystrophin-associated glycoprotein 1)              | -0.19 | CGGTTGGTGAATAACAGACTA  | NM_004393: | NM_004393:                     |
| 1605   | DAG1     | dystroglycan 1 (dystrophin-associated glycoprotein 1)              | -6.45 | AAGGTTGTGACTTACATTTCA  | NM_004393: | NM_004393:                     |
| 26007  | DAK      | dihydroxyacetone kinase 2 homolog (yeast)                          | 1.08  | AAGAAAGTTAATAAATCTATA  | NM_015533: | NM_015533:                     |
| 26007  | DAK      | dihydroxyacetone kinase 2 homolog (yeast)                          | -3.20 | CGGAAAGAGCCAGTATATCA   | NM_015533: | NM_015533:                     |
| 1610   | DAO      | D-amino-acid oxidase                                               | -0.58 | CAAGTTGACTAATCATTTAA   | NM_001917: | NM_001917:                     |
| 1610   | DAO      | D-amino-acid oxidase                                               | -0.75 | ATGAGGATAAATTCAGGGCTAA | NM_001917: | NM_001917:                     |
| 267012 | DAOA     | D-amino acid oxidase activator                                     | 0.01  | AAGAGAGAGCGTAAACAGGAA  | NM_172370: | NM_172370:                     |
| 267012 | DAOA     | D-amino acid oxidase activator                                     | -0.63 | AGGCATTTACAGAGATCATT   | NM_172370: | NM_172370:                     |
| 7818   | DAP3     | death associated protein 3                                         | -1.43 | TGCTTTGTGATCGAGTGAA    | NM_033657: | NM_033657:NM_004632:           |
| 7818   | DAP3     | death associated protein 3                                         | 0.00  | TTGGCTTGGACCTGCATTA    | NM_033657: | NM_033657:NM_004632:           |
| 1612   | DAPK1    | death-associated protein kinase 1                                  | -1.88 | AAGCATGTAAATGTTAATGTTA | NM_004938: | NM_004938:                     |
| 1612   | DAPK1    | death-associated protein kinase 1                                  | -3.34 | CGGCTATTACTCTGTGGCCAA  | NM_004938: | NM_004938:                     |
| 23604  | DAPK2    | death-associated protein kinase 2                                  | -1.55 | CGGAATTTGTTGCTCCAGAAA  | NM_014326: | NM_014326:                     |
| 23604  | DAPK2    | death-associated protein kinase 2                                  | -4.17 | CTGGTTAAAGAGACCCGGAAA  | NM_014326: | NM_014326:                     |



|        |             |                                                                        |        |                        |            |                                          |
|--------|-------------|------------------------------------------------------------------------|--------|------------------------|------------|------------------------------------------|
| 1613   | DAPK3       | death-associated protein kinase 3                                      | 0.96   | CCCAGAGATTGGAACATGA    | NM_001348: | NM_001348:                               |
| 1613   | DAPK3       | death-associated protein kinase 3                                      | 0.02   | CGGCAGAGGGCCACGGCCAA   | NM_001348: | NM_001348:                               |
| 27071  | DAPP1       | dual adaptor of phosphotyrosine and 3-phosphoinositides                | -0.57  | CTGGCCCTATTAAAGAGCAA   | NM_014395: | NM_014395:                               |
| 27071  | DAPP1       | dual adaptor of phosphotyrosine and 3-phosphoinositides                | 0.00   | TAGGTAGTATAATAAAGGTAA  | NM_014395: | NM_014395:                               |
| 2532   | DARC        | Duffy blood group, chemokine receptor                                  | 0.58   | ACCAGTTCCTGGGTATCTCTA  | NM_002036: | NM_002036:                               |
| 2532   | DARC        | Duffy blood group, chemokine receptor                                  | -2.46  | CAGCTGGACTTCGAAGATGTA  | NM_002036: | NM_002036:                               |
| 1616   | DAXX        | death-associated protein 6                                             | -2.17  | CACCCGCTACCCAGAGGTTAA  | NM_001350: | NM_001350:                               |
| 1616   | DAXX        | death-associated protein 6                                             | 1.51   | CACGGTTGAAGCGTAAAGCTGA | NM_001350: | NM_001350:                               |
| 10926  | DBF4        | DBF4 homolog (S. cerevisiae)                                           | 1.41   | CAAGTTGTTGATGATATTGTA  | NM_006716: | NM_006716:                               |
| 10926  | DBF4        | DBF4 homolog (S. cerevisiae)                                           | 1.51   | CAGGTACCAGTGGGAATATA   | NM_006716: | NM_006716:                               |
| 1621   | DBH         | dopamine beta-hydroxylase (dopamine beta-monoxygenase)                 | 0.19   | GCGGGCTAATGAGCCAATAAA  | NM_000787: | NM_000787:                               |
| 1621   | DBH         | dopamine beta-hydroxylase (dopamine beta-monoxygenase)                 | -0.01  | CGGGAGTGGGAGATCGTGAA   | NM_000787: | NM_000787:                               |
| 1622   | DBI         | diazepam binding inhibitor (GABA receptor modulator, acyl-Coenzyme     | -0.38  | CAACAAAGTAGAAGAGCTAAA  | NM_020548: | NM_020548:                               |
| 1622   | DBI         | diazepam binding inhibitor (GABA receptor modulator, acyl-Coenzyme     | 0.24   | CCAGTTAAACCAGCTACTCAA  | NM_020548: | NM_020548:                               |
| 1629   | DBT         | dihydroloamide branched chain transacylase E2                          | 0.96   | TAGCATATACAGACAGTATA   | NM_001918: | NM_001918:                               |
| 1629   | DBT         | dihydroloamide branched chain transacylase E2                          | 0.86   | ACGATTGTATCGTATGATTA   | NM_001918: | NM_001918:                               |
| 160365 | DCAL1       | dendritic cell-associated lectin-1                                     | -1.47  | TATGGTGAAGTTTAAACATTTA | NM_172004: | NM_172004:                               |
| 160365 | DCAL1       | dendritic cell-associated lectin-1                                     | 0.07   | AAGTTTCAACTTCATGTGTTA  | NM_172004: | NM_172004:                               |
| 9201   | DCAMKL1     | doublecortin and CaM kinase-like 1                                     | 0.03   | CAGGTTTAACTTCGACACA    | NM_004734: | NM_004734:                               |
| 9201   | DCAMKL1     | doublecortin and CaM kinase-like 1                                     | -0.10  | COGGAAGTGATAACACGCAAA  | NM_004734: | NM_004734:                               |
| 166614 | DCAMKL2     | doublecortin and CaM kinase-like 2                                     | -1.23  | ACAGATGCTCTGAATCATGAA  | NM_152619: | NM_152619:                               |
| 166614 | DCAMKL2     | doublecortin and CaM kinase-like 2                                     | -4.69  | CTGAGCTTGACCGTTGATGAA  | NM_152619: | NM_152619:                               |
| 85443  | DCAMKL3     | doublecortin and CaM kinase-like 3                                     | 0.64   | CCAGCTAATGAAGATAAACTA  | XM_047355: | XM_047355:                               |
| 85443  | DCAMKL3     | doublecortin and CaM kinase-like 3                                     | 0.24   | TCGAAGGAGCTCAGAGTTCAA  | XM_047355: | XM_047355:                               |
| 131566 | DCBLD2      | discoidin, CUB and LCCL domain containing 2                            | -0.77  | ACGCACGGTACTGTTCTTGAA  | NM_080927: | NM_080927:                               |
| 131566 | DCBLD2      | discoidin, CUB and LCCL domain containing 2                            | 0.11   | TGGGATGTCAGTTTATTCCTA  | NM_080927: | NM_080927:                               |
| 1630   | DCC         | deleted in colorectal carcinoma                                        | -0.54  | CACCTGTGTCGAAGAAGCTCTA | NM_005215: | NM_005215:                               |
| 1630   | DCC         | deleted in colorectal carcinoma                                        | 0.84   | CAGCATACCAATACCCATATA  | NM_005215: | NM_005215:                               |
| 54798  | DCHS2       | dachsous 2 (Drosophila)                                                | 0.72   | AAGCACCAGTGAATATAATA   | NM_017639: | NM_017639:                               |
| 54798  | DCHS2       | dachsous 2 (Drosophila)                                                | -1.56  | ATGTTGAGTTTAAATAGTAT   | NM_017639: | NM_017639:                               |
| 1633   | DKK         | deoxyxylidine kinase                                                   | -2.83  | AAGTTGCAAGTGGAAATATA   | NM_000788: | NM_000788:                               |
| 1633   | DKK         | deoxyxylidine kinase                                                   | 1.74   | TTGGTATAAATTAATTTGTTA  | NM_000788: | NM_000788:                               |
| 9937   | DCLRE1A     | DNA cross-link repair 1A (PSO2 homolog, S. cerevisiae)                 | -0.80  | CGCATGATTCACAAGAACA    | NM_014881: | NM_014881:                               |
| 9937   | DCLRE1A     | DNA cross-link repair 1A (PSO2 homolog, S. cerevisiae)                 | 1.16   | TAGTTCATAACAATGTTTACA  | NM_014881: | NM_014881:                               |
| 64858  | DCLRE1B     | DNA cross-link repair 1B (PSO2 homolog, S. cerevisiae)                 | 0.48   | CACCTACAGTATCTAAGCAA   | NM_022836: | NM_022836:                               |
| 64858  | DCLRE1B     | DNA cross-link repair 1B (PSO2 homolog, S. cerevisiae)                 | -1.41  | CCAGATCTCTATAGCAAGAAA  | NM_022836: | NM_022836:                               |
| 64421  | DCLRE1C     | DNA cross-link repair 1C (PSO2 homolog, S. cerevisiae)                 | -1.98  | AAGTACGGAGCCAAAGTATA   | NM_022487: | NM_022487:                               |
| 64421  | DCLRE1C     | DNA cross-link repair 1C (PSO2 homolog, S. cerevisiae)                 | 1.13   | CAGGTTCAATGTAATAAGCTA  | NM_022487: | NM_022487:                               |
| 1634   | DCN         | decorin                                                                | -1.36  | TAGTGCCTGCTGCCATTCAA   | NM_133507: | NM_133507:                               |
| 1634   | DCN         | decorin                                                                | -1.98  | AAGTAGACTACTGGAACCTA   | NM_133507: | NM_133507:                               |
| 149095 | DCST1       | DC-STAMP domain containing 1                                           | -1.45  | TACAATGACCTATTGAAGAAA  | NM_152494: | NM_152494:                               |
| 149095 | DCST1       | DC-STAMP domain containing 1                                           | -0.52  | CAGAGACAGTGTGAATCAA    | NM_152494: | NM_152494:                               |
| 1639   | DCTN1       | dyncactin 1 (p150, glued homolog, Drosophila)                          | -0.14  | TCGGCCCAACTTATGGAGCAA  | NM_004082: | NM_004082:                               |
| 1639   | DCTN1       | dyncactin 1 (p150, glued homolog, Drosophila)                          | 1.23   | TCGAAGATCGAGAGACAGTTA  | NM_004082: | NM_004082:                               |
| 92181  | DC-UbP      | dendritic cell-derived ubiquitin-like protein                          | 0.41   | AGGCAGTTAAGAAATAGATA   | NM_152277: | NM_152277:                               |
| 92181  | DC-UbP      | dendritic cell-derived ubiquitin-like protein                          | 1.02   | AAGGCAGTTAAGAAATAGATA  | NM_152277: | NM_152277:                               |
| 54165  | DCUN1D1     | DCN1, defective in cullin neddylation 1, domain containing 1 (S. cerev | 1.88   | CAGCATTAGTGTGTTGATTAT  | NM_020640: | NM_020640:                               |
| 54165  | DCUN1D1     | DCN1, defective in cullin neddylation 1, domain containing 1 (S. cerev | 0.64   | CTGGCCCGCTCAACATTTA    | NM_020640: | NM_020640:                               |
| 1641   | DCX         | doublecortin; lissencephaly, X-linked (doublecortin)                   | -0.12  | CTGAATAGACAGTCCATATA   | NM_000555: | NM_178151:NM_000555:NM_178152:NM_178153: |
| 1641   | DCX         | doublecortin; lissencephaly, X-linked (doublecortin)                   | 0.21   | ACCCTGCACATTTGATCTTAA  | NM_000555: | NM_178151:NM_000555:NM_178152:NM_178153: |
| 51181  | DCXR        | dicarbonyl-L-xylulose reductase                                        | 0.30   | AAAGGCCAAGACTATGCTGAA  | NM_016286: | NM_016286:                               |
| 51181  | DCXR        | dicarbonyl-L-xylulose reductase                                        | 0.01   | AAGGAGGCCCTTGACAGATCC  | NM_016286: | NM_016286:                               |
| 1642   | DBD1        | damage-specific DNA binding protein 1, 127kDa                          | 0.78   | ATGCAGAATCGACTCAATAAA  | NM_001923: | NM_001923:                               |
| 1642   | DBD1        | damage-specific DNA binding protein 1, 127kDa                          | 1.94   | CCACTAGATCGCGATAATAAA  | NM_001923: | NM_001923:                               |
| 1643   | DBD2 (damag | damage-specific DNA binding protein 2, 48kDa                           | 1.38   | AGGGATCAAGCAGTTATTTTGA | NM_000107: | NM_000107:                               |
| 1643   | DBD2 (damag | damage-specific DNA binding protein 2, 48kDa                           | -0.24  | CTGGATTCTTACCGGATATTA  | NM_000107: | NM_000107:                               |
| 1644   | DDC         | dopa decarboxylase (aromatic L-amino acid decarboxylase)               | -1.88  | TCGGCTAAGGGTTCACCAACA  | NM_000790: | NM_000790:                               |
| 1644   | DDC         | dopa decarboxylase (aromatic L-amino acid decarboxylase)               | -4.15  | CAGCCTTATATCCGCAAGCAT  | NM_000790: | NM_000790:                               |
| 84301  | DDI2        | DDI1, DNA-damage inducible 1, homolog 2 (S. cerevisiae)                | -0.77  | CCCAATAGATTTTCAGTAGTA  | XM_496347: | XM_496347:                               |
| 84301  | DDI2        | DDI1, DNA-damage inducible 1, homolog 2 (S. cerevisiae)                | 1.03   | CCAGTGCAGTTCCCAAACTTA  | XM_496347: | XM_496347:                               |
| 1649   | DDIT3       | DNA-damage-inducible transcript 3                                      | -0.23  | AAGGAAGTGTATCTTCATACA  | NM_004083: | NM_004083:                               |
| 1649   | DDIT3       | DNA-damage-inducible transcript 3                                      | 1.00   | CAGCTGTATATAGAGATTGT   | NM_004083: | NM_004083:                               |
| 780    | DDR1        | discoidin domain receptor family, member 1                             | 0.49   | ACGGTGTGAATCACACATCCA  | NM_001954: | NM_001954:NM_013993:NM_013994:           |
| 780    | DDR1        | discoidin domain receptor family, member 1                             | 0.21   | CAGGAATGATTCCTGAAAGA   | NM_001954: | NM_001954:NM_013993:NM_013994:           |
| 4921   | DDR2        | discoidin domain receptor family, member 2                             | 0.01   | ACGCACCTGTCAAGTACACCAA | NM_006182: | NM_006182:NM_00104796:                   |
| 4921   | DDR2        | discoidin domain receptor family, member 2                             | -0.12  | CCGGTTCATTCCAGTACCCGA  | NM_006182: | NM_006182:NM_00104796:                   |
| 1653   | DDX1        | DEAD (Asp-Glu-Ala-Asp) box polypeptide 1                               | 0.84   | CACGGTGTCCCTATGTTTATA  | NM_004939: | NM_004939:                               |
| 1653   | DDX1        | DEAD (Asp-Glu-Ala-Asp) box polypeptide 1                               | 0.30   | CGGGATGGTTACATTGTCAAA  | NM_004939: | NM_004939:                               |
| 11218  | DDX20       | DEAD (Asp-Glu-Ala-Asp) box polypeptide 20                              | 0.45   | GGGCTCGATTAAATGTTGCAA  | NM_007204: | NM_007204:                               |
| 11218  | DDX20       | DEAD (Asp-Glu-Ala-Asp) box polypeptide 20                              | 0.42   | CTGGACTATCAGTCAAAATCAA | NM_007204: | NM_007204:                               |
| 29118  | DDX25       | DEAD (Asp-Glu-Ala-Asp) box polypeptide 25                              | 1.23   | AAGGCCAAGATTATTTGCTTA  | NM_015191: | NM_015191:                               |
| 26512  | DDX26       | DEAD/H (Asp-Glu-Ala-Asp/His) box polypeptide 26                        | -2.47  | CAGACCACTTCATCAGACA    | NM_012141: | NM_012141:                               |
| 26512  | DDX26       | DEAD/H (Asp-Glu-Ala-Asp/His) box polypeptide 26                        | 0.86   | CACTAATGATTCGATAATACA  | NM_012141: | NM_012141:                               |
| 51428  | DDX41       | DEAD (Asp-Glu-Ala-Asp) box polypeptide 41                              | -0.84  | COGACATTTGATGTCAGTGAA  | NM_016222: | NM_016222:                               |
| 51428  | DDX41       | DEAD (Asp-Glu-Ala-Asp) box polypeptide 41                              | -3.95  | COGCTGTACTCATCTTTGCA   | NM_016222: | NM_016222:                               |
| 9775   | DDX48       | DEAD (Asp-Glu-Ala-Asp) box polypeptide 48                              | -14.21 | AAAGAGCAGATTTAGCATGTA  | NM_014740: | NM_014740:                               |
| 9775   | DDX48       | DEAD (Asp-Glu-Ala-Asp) box polypeptide 48                              | -11.68 | CGCATCTTTGGTGAACGTTGA  | NM_014740: | NM_014740:                               |
| 79039  | DDX54       | DEAD (Asp-Glu-Ala-Asp) box polypeptide 54                              | -4.32  | CGGGCTGACGTTGGATACCAA  | NM_024072: | NM_024072:                               |
| 79039  | DDX54       | DEAD (Asp-Glu-Ala-Asp) box polypeptide 54                              | 0.39   | GGGCACTATCTTTGAGATCAA  | NM_024072: | NM_024072:                               |
| 1666   | DECR1       | 2,4-dienoyl CoA reductase 1, mitochondrial                             | 0.57   | CACAGCCTTCGTCACACTAGA  | NM_001359: | NM_001359:                               |
| 1666   | DECR1       | 2,4-dienoyl CoA reductase 1, mitochondrial                             | -0.14  | ATGCGATTCAATGATGTTCAA  | NM_001359: | NM_001359:                               |
| 26063  | DECR2       | 2,4-dienoyl CoA reductase 2, peroxisomal                               | -0.40  | AAGAAGAGGATTAAGAGAAA   | NM_020664: | NM_020664:                               |
| 26063  | DECR2       | 2,4-dienoyl CoA reductase 2, peroxisomal                               | -0.71  | AAGATAACTTATTTACTGTAA  | NM_020664: | NM_020664:                               |
| 9191   | DEDD        | death effector domain containing                                       | -3.49  | CTGAGCCGTAAAGCAAAATGTA | NM_004216: | NM_032998:NM_004216:                     |
| 9191   | DEDD        | death effector domain containing                                       | -0.67  | TGGCTTTATGAGAGCTCTTAA  | NM_004216: | NM_032998:NM_004216:                     |
| 162989 | DEDD2       | death effector domain containing 2                                     | -0.84  | ACCAATTAACCTGCCCTGGAA  | NM_133328: | NM_133328:                               |
| 162989 | DEDD2       | death effector domain containing 2                                     | 0.16   | CAGGATTGATCCACCTCCAA   | NM_133328: | NM_133328:                               |
| 50619  | DEF6        | differentially expressed in FDCP 6 homolog (mouse)                     | -1.75  | CGGGAACAGTATGCTTCCAA   | NM_022047: | NM_022047:                               |
| 50619  | DEF6        | differentially expressed in FDCP 6 homolog (mouse)                     | -0.03  | CAGGCCAGCACCACCTGGAAA  | NM_022047: | NM_022047:                               |
| 1667   | DEFA1       | defensin, alpha 1                                                      | 0.50   | ATGGCCTGCTATTCGAGAATA  | NM_004084: | NM_004084:                               |
| 1668   | DEFA3       | defensin, alpha 3, neutrophil-specific                                 | 0.42   | ATGGACTGCTATTCGAGAATA  | NM_005217: | NM_005217:                               |
| 1673   | DEFB4       | defensin, beta 4                                                       | 0.18   | GACGTGCGACATGTAACCCAA  | NM_004942: | NM_004942:                               |
| 1673   | DEFB4       | defensin, beta 4                                                       | 0.89   | GCCTAGAAGGTATAAACAAA   | NM_004942: | NM_004942:                               |

|        |               |                                                                       |       |                        |            |                                                        |
|--------|---------------|-----------------------------------------------------------------------|-------|------------------------|------------|--------------------------------------------------------|
| 8560   | DEGS1         | degenerative spermatocyte homolog 1, lipid desaturase (Drosophila)    | 1.08  | ACAGCCTTACTCATAAATAAA  | NM_003676: | NM_144780.NM_003676:                                   |
| 8560   | DEGS1         | degenerative spermatocyte homolog 1, lipid desaturase (Drosophila)    | -0.35 | CCCGAATTAGACACTGCTGAA  | NM_003676: | NM_144780.NM_003676:                                   |
| 7913   | DEK           | DEK oncogene (DNA binding)                                            | -0.82 | ATCGTGGATGCTCTGACAAA   | NM_003472: | NM_003472:                                             |
| 7913   | DEK           | DEK oncogene (DNA binding)                                            | -2.21 | CAGCTTACGATTATGACTAA   | NM_003472: | NM_003472:                                             |
| 51071  | DERA          | 2-deoxyribose-5-phosphate aldolase homolog (C. elegans)               | 0.43  | ACCGAAGCTTAAATGGAATGAA | NM_015954: | NM_015954:                                             |
| 51071  | DERA          | 2-deoxyribose-5-phosphate aldolase homolog (C. elegans)               | 1.39  | AGAAATCGACGGTAATTA     | NM_015954: | NM_015954:                                             |
| 79139  | DERL1         | Der1-like domain family, member 1                                     | 0.73  | TCGACTGACATCCGTTGTTAA  | NM_024295: | NM_024295:                                             |
| 79139  | DERL1         | Der1-like domain family, member 1                                     | 0.48  | CCATATTTAATTTATATGATA  | NM_024295: | NM_024295:                                             |
| 1674   | DES           | desmin                                                                | -0.08 | CAGCAGCATGAAGTGCCTAA   | NM_001927: | NM_001927:                                             |
| 1674   | DES           | desmin                                                                | 0.01  | CAAGAAGACGGTATGATCAA   | NM_001927: | NM_001927:                                             |
| 1677   | DFFB          | DNA fragmentation factor, 40kDa, beta polypeptide (caspase-activator) | -1.17 | ACGGTTCAGTAGGATAAGAA   | NM_004402: | NM_004402.NM_001004286.NM_001004285:                   |
| 1677   | DFFB          | DNA fragmentation factor, 40kDa, beta polypeptide (caspase-activator) | 0.91  | TACGATGTTTATCTCCGTAA   | NM_004402: | NM_004402.NM_001004286.NM_001004285:                   |
| 1687   | DFNA5         | deafness, autosomal dominant 5                                        | 0.45  | GCGGTCCTATTTGATGATGAA  | NM_004403: | NM_004403:                                             |
| 1687   | DFNA5         | deafness, autosomal dominant 5                                        | 1.08  | TAGAAAGAGCTGACCCCTTA   | NM_004403: | NM_004403:                                             |
| 9993   | DGCR2         | DiGeorge syndrome critical region gene 2                              | 2.03  | GAGGTGGGATTGATACTGTA   | NM_005137: | NM_005137:                                             |
| 9993   | DGCR2         | DiGeorge syndrome critical region gene 2                              | -0.26 | AAGCCAGTTGGAATATCAA    | NM_005137: | NM_005137:                                             |
| 1606   | DGKA          | diacylglycerol kinase, alpha 80kDa                                    | -1.54 | ATCCATCTTCTCAACATGCAA  | NM_001345: | NM_201554.NM_001345.NM_201444.NM_201445:               |
| 1606   | DGKA          | diacylglycerol kinase, alpha 80kDa                                    | -1.27 | CACGACAGTGTGCCATGAAA   | NM_001345: | NM_201554.NM_001345.NM_201444.NM_201445:               |
| 1607   | DGKB          | diacylglycerol kinase, beta 90kDa                                     | 0.00  | CCCGAAGCTTCTCTCTGCAA   | NM_004080: | NM_004080.NM_145695:                                   |
| 1607   | DGKB          | diacylglycerol kinase, beta 90kDa                                     | 2.49  | CTCATTCTAGTCCAAATGGTAA | NM_004080: | NM_004080.NM_145695:                                   |
| 8527   | DGKD          | diacylglycerol kinase, delta 130kDa                                   | -0.36 | CAGCAGATTTCTCTTATGAA   | NM_003648: | NM_152879.NM_003648:                                   |
| 8527   | DGKD          | diacylglycerol kinase, delta 130kDa                                   | -0.92 | CGGCTCGTGACCAAGTTTAA   | NM_003648: | NM_152879.NM_003648:                                   |
| 8526   | DGKE          | diacylglycerol kinase, epsilon 64kDa                                  | 1.12  | ATCGATGGAAGTTCAGTAA    | NM_003647: | NM_003647:                                             |
| 8526   | DGKE          | diacylglycerol kinase, epsilon 64kDa                                  | 1.17  | CTGGAAGTCGTTGGAGTAT    | NM_003647: | NM_003647:                                             |
| 1608   | DGKG          | diacylglycerol kinase, gamma 90kDa                                    | -0.09 | ACCGCAATGTGAATATCAA    | NM_001346: | NM_001346:                                             |
| 1608   | DGKG          | diacylglycerol kinase, gamma 90kDa                                    | -5.34 | TAGCCACTCACATAAAGTTTA  | NM_001346: | NM_001346:                                             |
| 160851 | DGKH          | diacylglycerol kinase, eta                                            | -4.28 | CAGGTGGAGTATAATGACATA  | NM_152910: | NM_178009.NM_152910:                                   |
| 160851 | DGKH          | diacylglycerol kinase, eta                                            | -0.92 | CGGATCTAGATTCCTGATAGT  | NM_152910: | NM_178009.NM_152910:                                   |
| 9162   | DGKI          | diacylglycerol kinase, iota                                           | -4.02 | ACGGATCGAATGCTCACTTACA | NM_004717: | NM_004717:                                             |
| 9162   | DGKI          | diacylglycerol kinase, iota                                           | -0.39 | CAGAAGGATGCTTCAACTATT  | NM_004717: | NM_004717:                                             |
| 139189 | DGKK (diacyl) | diacylglycerol kinase, kappa                                          | -0.16 | ATGCGGTAGATGTTACATTTA  | XM_066534: | XM_001013742:                                          |
| 139189 | DGKK (diacyl) | diacylglycerol kinase, kappa                                          | -0.69 | CAGACAGACAATATCTGTTAA  | XM_066534: | XM_001013742:                                          |
| 1609   | DGKQ          | diacylglycerol kinase, theta 110kDa                                   | 0.17  | CAGCGACACCAAGTTTGAGAA  | NM_001347: | NM_001347:                                             |
| 1609   | DGKQ          | diacylglycerol kinase, theta 110kDa                                   | 1.99  | CCGGAAGGTGACGCTCACCAA  | NM_001347: | NM_001347:                                             |
| 8525   | DGKZ          | diacylglycerol kinase, zeta 104kDa                                    | 0.86  | CAAGAGGAACCACTTCTGTAA  | NM_003646: | NM_201533.NM_201532.NM_003646:                         |
| 8525   | DGKZ          | diacylglycerol kinase, zeta 104kDa                                    | 0.63  | CTGAGCGAGTACGCGACATA   | NM_003646: | NM_201533.NM_201532.NM_003646:                         |
| 1716   | DGUOK         | deoxyguanosine kinase                                                 | -5.68 | CACCTTTGTAAGAATCTGTA   | NM_001929: | NM_001929.NM_080918.NM_080917.NM_080916:<br>NM_080915: |
| 1716   | DGUOK         | deoxyguanosine kinase                                                 | -0.06 | CAGCAGATGCTCTCACAT     | NM_001929: | NM_080915:                                             |
| 1718   | DHCR24        | 24-dehydrocholesterol reductase                                       | 0.49  | AACGCAAGCTTGGTGTGTTA   | NM_014762: | NM_014762:                                             |
| 1718   | DHCR24        | 24-dehydrocholesterol reductase                                       | -0.47 | CCGGTCTCTCTTCACTTGA    | NM_014762: | NM_014762:                                             |
| 1717   | DHCR7         | 7-dehydrocholesterol reductase                                        | 0.40  | TTGACTTCTCTGGAACGAAA   | NM_001360: | NM_001360:                                             |
| 1717   | DHCR7         | 7-dehydrocholesterol reductase                                        | -1.48 | CGGGAAGTGGTTTGACTTCAA  | NM_001360: | NM_001360:                                             |
| 1719   | DHFR (dihydr) | dihydrofolate reductase                                               | -0.16 | AAGTAACATAACGGAAGGAAA  | NM_000791: | NM_000791:                                             |
| 1719   | DHFR (dihydr) | dihydrofolate reductase                                               | 0.32  | CAGGATAGGAAGACATAATA   | NM_000791: | NM_000791:                                             |
| 200895 | DHFRL1        | dihydrofolate reductase-like 1                                        | 0.61  | AAGACTGTAATAAGAAATCA   | NM_176815: | NM_176815:                                             |
| 200895 | DHFRL1        | dihydrofolate reductase-like 1                                        | -9.40 | CAGGCAAGAATCAAGGGTGA   | NM_176815: | NM_176815:                                             |
| 50846  | DHH           | desert hedgehog homolog (Drosophila)                                  | 1.82  | CCCAGGCATAGAAACCTCGAA  | NM_021044: | NM_021044:                                             |
| 50846  | DHH           | desert hedgehog homolog (Drosophila)                                  | 1.35  | ACCGAGTGGCCCTCCACGAAA  | NM_021044: | NM_021044:                                             |
| 1723   | DHODH         | dihydroorotate dehydrogenase                                          | -0.31 | CAGGAAGTGTACTGCTTTTCA  | NM_001361: | NM_001361.NM_001025193:                                |
| 1723   | DHODH         | dihydroorotate dehydrogenase                                          | -0.54 | CTCCGGGTTTATCACTCAA    | NM_001361: | NM_001361.NM_001025193:                                |
| 115817 | DHRS1         | dehydrogenase/reductase (SDR family) member 1                         | -2.45 | TACCCATACCCCTTGATGAA   | NM_138452: | NM_138452:                                             |
| 115817 | DHRS1         | dehydrogenase/reductase (SDR family) member 1                         | -3.01 | CAAGTGGATTATGCCCTCTA   | NM_138452: | NM_138452:                                             |
| 51171  | DHRS10        | dehydrogenase/reductase (SDR family) member 10                        | -1.20 | CCGAGTGGTTATCTGCGACAA  | NM_016246: | NM_016246:                                             |
| 51171  | DHRS10        | dehydrogenase/reductase (SDR family) member 10                        | -1.37 | CAGCCTTATTTGAGGATTTGA  | NM_016246: | NM_016246:                                             |
| 10202  | DHRS2         | dehydrogenase/reductase (SDR family) member 2                         | 0.87  | CTCTCTGTAATTTTGCTTTA   | NM_005794: | NM_182908.NM_005794:                                   |
| 10202  | DHRS2         | dehydrogenase/reductase (SDR family) member 2                         | 0.69  | TAGATTTGGCTGATCCAAATTA | NM_005794: | NM_182908.NM_005794:                                   |
| 9249   | DHRS3         | dehydrogenase/reductase (SDR family) member 3                         | -2.43 | CACCTGATGAACACTTTTCAA  | NM_004753: | NM_004753:                                             |
| 9249   | DHRS3         | dehydrogenase/reductase (SDR family) member 3                         | 0.61  | ATGACTACTGCACATCCAAA   | NM_004753: | NM_004753:                                             |
| 10901  | DHRS4         | dehydrogenase/reductase (SDR family) member 4                         | 0.28  | TTGCGCGGCTTTGAATCCAAA  | NM_021004: | NM_021004:                                             |
| 51635  | DHRS7         | dehydrogenase/reductase (SDR family) member 7                         | 0.91  | ACCTTTCTGTTAGTAACATA   | NM_016029: | NM_016029:                                             |
| 51635  | DHRS7         | dehydrogenase/reductase (SDR family) member 7                         | 0.68  | GCGGCTGATGTTAATCAGCAT  | NM_016029: | NM_016029:                                             |
| 25979  | DHRS7B        | dehydrogenase/reductase (SDR family) member 7B                        | 2.20  | CAGATGTTATGTCACCTGAAA  | NM_015510: | NM_015510:                                             |
| 25979  | DHRS7B        | dehydrogenase/reductase (SDR family) member 7B                        | 1.28  | TTGCATTTTGGAGACTTTAA   | NM_015510: | NM_015510:                                             |
| 201140 | DHRS7C (del)  | dehydrogenase/reductase (SDR family) member 7C                        | -0.22 | CCGAGCCGAAGTGGGGAATA   | XM_113912: | XM_113912:                                             |
| 201140 | DHRS7C (del)  | dehydrogenase/reductase (SDR family) member 7C                        | 0.88  | TACCAGGTGATCCAGAGCAA   | XM_113912: | XM_113912:                                             |
| 51170  | DHRS8         | dehydrogenase/reductase (SDR family) member 8                         | -1.20 | CCGGCAAAATCGTCTGATTA   | NM_016245: | NM_016245:                                             |
| 51170  | DHRS8         | dehydrogenase/reductase (SDR family) member 8                         | 0.15  | AACCGTTATTTAACAATATA   | NM_016245: | NM_016245:                                             |
| 10170  | DHRS9         | dehydrogenase/reductase (SDR family) member 9                         | -0.45 | TCGTGCTTATTTGGATTGCAA  | NM_005771: | NM_005771.NM_199204:                                   |
| 10170  | DHRS9         | dehydrogenase/reductase (SDR family) member 9                         | -0.89 | CAGCTTAAGACGGACATGAA   | NM_005771: | NM_005771.NM_199204:                                   |
| 207063 | DHRSX         | dehydrogenase/reductase (SDR family) X-linked                         | 0.36  | CCAAGTGGCTTCAACACATA   | NM_145177: | NM_145177:                                             |
| 207063 | DHRSX         | dehydrogenase/reductase (SDR family) X-linked                         | -0.24 | CCGCGTTAATACAACCTGAGTA | NM_145177: | NM_145177:                                             |
| 90957  | DHX57         | DEAH (Asp-Glu-Ala-Asp/His) box polypeptide 57                         | 2.04  | TAAGTTCAACGATAACTCAA   | NM_145646: | NM_145646.NM_198963:                                   |
| 90957  | DHX57         | DEAH (Asp-Glu-Ala-Asp/His) box polypeptide 57                         | -0.56 | ACCAAGAACGATGGATATGTA  | NM_145646: | NM_145646.NM_198963:                                   |
| 1729   | DIAPH1        | diaphanous homolog 1 (Drosophila)                                     | 0.31  | TAAGAGTAGCAAGAACTCTAA  | NM_005219: | NM_005219:                                             |
| 1729   | DIAPH1        | diaphanous homolog 1 (Drosophila)                                     | 0.02  | TTGTTGGCCGGAAGCTTAA    | NM_005219: | NM_005219:                                             |
| 1730   | DIAPH2        | diaphanous homolog 2 (Drosophila)                                     | 0.57  | CACAGATAATTCITTTATATA  | NM_006729: | NM_006729:                                             |
| 1730   | DIAPH2        | diaphanous homolog 2 (Drosophila)                                     | -1.32 | ACCGTCGAAGCGGATCCCAA   | NM_006729: | NM_006729.NM_007309:                                   |
| 23405  | DICER1        | Dicer1, Dcr-1 homolog (Drosophila)                                    | 0.04  | ATCGATCTATGTTCAATCTA   | NM_030621: | NM_030621.NM_177438:                                   |
| 23405  | DICER1        | Dicer1, Dcr-1 homolog (Drosophila)                                    | -0.28 | TTGCTCCGTTAGGTTGCCTAA  | NM_030621: | NM_030621.NM_177438:                                   |
| 11083  | DIDO1         | death inducer-obliterator 1                                           | -0.14 | AACGTTACCTTAATGATTTGA  | NM_022105: | NM_080796.NM_022105:                                   |
| 11083  | DIDO1         | death inducer-obliterator 1                                           | -2.49 | CTGGTGAACGTTCACTTAAAT  | NM_022105: | NM_080796.NM_022105:                                   |
| 1733   | DIO1          | deiodinase, iodothyronine, type I                                     | -0.02 | AAGAGGAGAGTCACTCACTTAA | NM_000792: | NM_000792.NM_213593:                                   |
| 1733   | DIO1          | deiodinase, iodothyronine, type I                                     | 0.02  | CCCAATCAAGCAAAATGTTTA  | NM_000792: | NM_000792.NM_213593:                                   |
| 1734   | DIO2          | deiodinase, iodothyronine, type II                                    | -0.01 | TCGGAAGAACATGAATCTCTA  | NM_000793: | NM_001007023.NM_000793.NM_013989:                      |
| 1734   | DIO2          | deiodinase, iodothyronine, type II                                    | -0.61 | CTGTTAAAGGTATGATTATA   | NM_000793: | NM_001007023.NM_000793.NM_013989:                      |
| 1735   | DIO3          | deiodinase, iodothyronine, type III                                   | -1.07 | CCGGAAGGTTAAACATCCCAA  | NM_001362: | NM_001362:                                             |
| 1735   | DIO3          | deiodinase, iodothyronine, type III                                   | -0.78 | CCGTGAGGTAACCACTTAAA   | NM_001362: | NM_001362:                                             |
| 1736   | DKC1          | dyskeratosis congenita 1, dyskerin                                    | 0.80  | CGGCTGCACAATGCTATTGAA  | NM_001363: | NM_001363:                                             |
| 1736   | DKC1          | dyskeratosis congenita 1, dyskerin                                    | 0.42  | CCCAAGGTGACTGGTGTGTTA  | NM_001363: | NM_001363:                                             |
| 222229 | DKFZp434K1    | hypothetical protein DKFZp434K1815                                    | 1.82  | GACGGTCAATGACAACCTGAA  | NM_152892: | NM_152892:                                             |
| 222229 | DKFZp434K1    | hypothetical protein DKFZp434K1815                                    | 0.81  | CACAGCTAACTAATCTTCAA   | NM_152892: | NM_152892:                                             |
| 25891  | DKFZP586H2    | regeneration associated muscle protease                               | -2.72 | CCCAAGTTCAAGTATACGAA   | NM_015430: | NM_001001991.NM_015430:                                |
| 25891  | DKFZP586H2    | regeneration associated muscle protease                               | -2.11 | CTGATTTGAAAGAAATATGAA  | NM_015430: | NM_001001991.NM_015430:                                |
| 157285 | DKFZp761P0    | hypothetical protein DKFZp761P0423                                    | -1.62 | CTGGCCCGCTTGTAGCCAAA   | XM_291277: | XM_291277:                                             |
| 157285 | DKFZp761P0    | hypothetical protein DKFZp761P0423                                    | 0.33  | CAGCTGAGCGTGCACGTCAA   | XM_291277: | XM_291277:                                             |

|        |                             |                                                                       |       |                        |            |                                          |
|--------|-----------------------------|-----------------------------------------------------------------------|-------|------------------------|------------|------------------------------------------|
| 55355  | DKFZp762E1                  | hypothetical protein DKFZp762E1312                                    | -1.29 | ACCGTCAGAGGGAGATTGAAA  | NM_018410: | NM_018410:                               |
| 55355  | DKFZp762E1                  | hypothetical protein DKFZp762E1312                                    | 0.64  | TTGGCGTAAGACACAGTTTAA  | NM_018410: | NM_018410:                               |
| 22943  | DKK1                        | dickkopf homolog 1 (Xenopus laevis)                                   | 1.32  | ATGTAATCTTAATGCTTAA    | NM_012242: | NM_012242:                               |
| 22943  | DKK1                        | dickkopf homolog 1 (Xenopus laevis)                                   | 1.30  | CACACTTGTCCAGACACATA   | NM_012242: | NM_012242:                               |
| 27123  | DKK2                        | dickkopf homolog 2 (Xenopus laevis)                                   | 0.70  | AAGAACGTGATAGAATATA    | NM_014421: | NM_014421:                               |
| 27123  | DKK2                        | dickkopf homolog 2 (Xenopus laevis)                                   | 0.11  | CACAAAGTGTCCACATATA    | NM_014421: | NM_014421:                               |
| 27122  | DKK3                        | dickkopf homolog 3 (Xenopus laevis)                                   | 0.91  | ACCGAGAAATCCACAAGATA   | NM_013253: | NM_013253;NM_015881;NM_001018057:        |
| 27122  | DKK3                        | dickkopf homolog 3 (Xenopus laevis)                                   | -0.28 | TAGGGCGAGGATTATAAATGA  | NM_013253: | NM_013253;NM_015881;NM_001018057:        |
| 27121  | DKK4                        | dickkopf homolog 4 (Xenopus laevis)                                   | -0.44 | CTCGATTAAAGAGTATGCCAAA | NM_014420: | NM_014420:                               |
| 27121  | DKK4                        | dickkopf homolog 4 (Xenopus laevis)                                   | 0.44  | AAGCCAAGTATTAAAGAAATCA | NM_014420: | NM_014420:                               |
| 1737   | DLAT                        | dihydroliipoamide S-acetyltransferase (E2 component of pyruvate dehy) | -0.07 | CTCCAGCATCGCTCATGTAA   | NM_001931: | NM_001931:                               |
| 1737   | DLAT                        | dihydroliipoamide S-acetyltransferase (E2 component of pyruvate dehy) | 0.23  | TTGGTTTATCATCGATGGGAA  | NM_001931: | NM_001931:                               |
| 1738   | DLD                         | dihydroliipoamide dehydrogenase (E3 component of pyruvate dehydro)    | 1.37  | ACGATAGATGAAGATACAATA  | NM_000108: | NM_000108:                               |
| 1738   | DLD                         | dihydroliipoamide dehydrogenase (E3 component of pyruvate dehydro)    | -0.01 | CCCCTATTCAACACAGAATA   | NM_000108: | NM_000108:                               |
| 1739   | DLG1                        | discs, large homolog 1 (Drosophila)                                   | 0.36  | AACAGTGAATTCATTTCTAA   | NM_004087: | NM_004087:                               |
| 1739   | DLG1                        | discs, large homolog 1 (Drosophila)                                   | 0.18  | ACGGGTTATTACATATTTTCA  | NM_004087: | NM_004087:                               |
| 1740   | DLG2                        | discs, large homolog 2, chapsyn-110 (Drosophila)                      | -4.22 | CTCGACTAACCCACGAAGTAA  | NM_001364: | NM_001364:                               |
| 1740   | DLG2                        | discs, large homolog 2, chapsyn-110 (Drosophila)                      | 0.41  | TACGCTCGATTGAGGCCAAA   | NM_001364: | NM_001364:                               |
| 1742   | DLG4                        | discs, large homolog 4 (Drosophila)                                   | -4.49 | ATCGCTCAGTATAAACAGAAA  | NM_001365: | NM_001365:                               |
| 1742   | DLG4                        | discs, large homolog 4 (Drosophila)                                   | 0.01  | TACGAGGAAATCACATTTGAA  | NM_001365: | NM_001365:                               |
| 9231   | DLG5                        | discs, large homolog 5 (Drosophila)                                   | -0.15 | TTGCCTGTTTTCGACTATAA   | NM_004747: | NM_004747:                               |
| 9231   | DLG5                        | discs, large homolog 5 (Drosophila)                                   | 0.08  | TTGAGTAACCTTGCAATTCGA  | NM_004747: | NM_004747:                               |
| 9787   | DLG7                        | discs, large homolog 7 (Drosophila)                                   | 0.68  | AAGGAATACGAAACGAAATAGA | NM_014750: | NM_014750:                               |
| 9787   | DLG7                        | discs, large homolog 7 (Drosophila)                                   | 0.66  | TACTTTGAATTCACAACCTAA  | NM_014750: | NM_014750:                               |
| 8788   | DLK1                        | delta-like 1 homolog (Drosophila)                                     | 0.60  | CTCTTAATGCATGATACAGAA  | NM_003836: | NM_003836:                               |
| 8788   | DLK1                        | delta-like 1 homolog (Drosophila)                                     | -0.60 | CTGGAGCATGGCCCTCATGAA  | NM_003836: | NM_003836;NM_01032997;NM_003836:         |
| 10683  | DLL3                        | delta-like 3 (Drosophila)                                             | 0.19  | AAGGCTATTTTGTGATCAAA   | NM_016941: | NM_016941;NM_203486:                     |
| 10683  | DLL3                        | delta-like 3 (Drosophila)                                             | -1.11 | CCTGAAGATGTAGACCCCTCAA | NM_016941: | NM_016941;NM_203486:                     |
| 54567  | DLL4                        | delta-like 4 (Drosophila)                                             | -0.72 | CACGCCGGTATTGGCCACCAA  | NM_019074: | NM_019074:                               |
| 54567  | DLL4                        | delta-like 4 (Drosophila)                                             | 0.12  | GTCTAGTATTTCAATAATTTA  | NM_019074: | NM_019074:                               |
| 1747   | DLX3                        | distal-less homeobox 3                                                | 0.07  | CATCTTATATATAATGTTAA   | NM_005220: | NM_005220:                               |
| 1747   | DLX3                        | distal-less homeobox 3                                                | 1.04  | TGGACTCATCTTTATATATA   | NM_005220: | NM_005220:                               |
| 1755   | DMBT1                       | deleted in malignant brain tumors 1                                   | 0.81  | AGGGTACTTCATATAAAGGAA  | NM_004406: | NM_017579;NM_004406;NM_007329:           |
| 1755   | DMBT1                       | deleted in malignant brain tumors 1                                   | 0.21  | CCCCGGAATCATCCAAACAAAT | NM_004406: | NM_017579;NM_004406;NM_007329:           |
| 11144  | DMC1                        | DMC1 dosage suppressor of mck1 homolog, meiosis-specific homolog      | 0.29  | TCCCACTGATCAATAAAGAAA  | NM_007068: | NM_007068:                               |
| 11144  | DMC1                        | DMC1 dosage suppressor of mck1 homolog, meiosis-specific homolog      | -0.26 | TCCCTGATTTATGATAACTAT  | NM_007068: | NM_007068:                               |
| 1760   | DMPK                        | dystrophia myotonica-protein kinase                                   | -0.06 | AACCAGAACTTCGCCAGTCAAA | NM_004409: | NM_004409:                               |
| 1761   | DMRT1                       | doublesex and mab-3 related transcription factor 1                    | -0.90 | ATGGAGTACTTTGTTATATA   | NM_021951: | NM_021951:                               |
| 1761   | DMRT1                       | doublesex and mab-3 related transcription factor 1                    | 0.61  | TTGGTAAAGGGTGAATTTAA   | NM_021951: | NM_021951:                               |
| 63946  | DMRT2 (DMRT-like family C2) |                                                                       | -0.10 | CCCACAGTCAACCTACTCTA   | XM_290331: | NM_033052:                               |
| 8701   | DNAH11                      | dynein, axonemal, heavy polypeptide 11                                | 0.06  | TACGTTGTACACGCTTTGGCAA | NM_003777: | NM_003777:                               |
| 8701   | DNAH11                      | dynein, axonemal, heavy polypeptide 11                                | 0.84  | GAGCTTGTAAACCATAATTTAA | NM_003777: | NM_003777:                               |
| 56171  | DNAH7                       | dynein, axonemal, heavy polypeptide 7                                 | 0.24  | CGGGCTAATATCATTCGATCA  | NM_018897: | NM_018897:                               |
| 56171  | DNAH7                       | dynein, axonemal, heavy polypeptide 7                                 | 1.24  | TCGGAAGGCAATATATAGAA   | NM_018897: | NM_018897:                               |
| 1770   | DNAH9                       | dynein, axonemal, heavy polypeptide 9                                 | -0.20 | TGGACTGACCTCAATCCCAA   | NM_001372: | NM_001372:                               |
| 1770   | DNAH9                       | dynein, axonemal, heavy polypeptide 9                                 | 0.68  | AGGCATCGACATTTGCTTAA   | NM_001372: | NM_001372:                               |
| 27019  | DNAI1                       | dynein, axonemal, intermediate polypeptide 1                          | 0.26  | AAGGCCACATTTTGTGACTTA  | NM_012144: | NM_012144:                               |
| 27019  | DNAI1                       | dynein, axonemal, intermediate polypeptide 1                          | -0.27 | CAGCATTACCGGATGAATTA   | NM_012144: | NM_012144:                               |
| 3301   | DNAJA1                      | Dnaj (Hsp40) homolog, subfamily A, member 1                           | -0.87 | TCCGCTAATCATCGAATTTAA  | NM_001539: | NM_001539:                               |
| 3301   | DNAJA1                      | Dnaj (Hsp40) homolog, subfamily A, member 1                           | 1.61  | CTGGTGGACTTTGATCCAAAT  | NM_001539: | NM_001539:                               |
| 150353 | DNAJB7                      | Dnaj (Hsp40) homolog, subfamily B, member 7                           | 0.15  | ACGACAGTCCGGGTAACATAA  | NM_145174: | NM_145174:                               |
| 150353 | DNAJB7                      | Dnaj (Hsp40) homolog, subfamily B, member 7                           | -3.36 | CAGGTTACAGATACACAATTA  | NM_145174: | NM_145174:                               |
| 4189   | DNAJB9                      | Dnaj (Hsp40) homolog, subfamily B, member 9                           | 0.86  | CAAGTGATGATTTTCACTTTA  | NM_012328: | NM_012328:                               |
| 4189   | DNAJB9                      | Dnaj (Hsp40) homolog, subfamily B, member 9                           | 1.45  | TCGGATAGACTTATTTCTTTA  | NM_012328: | NM_012328:                               |
| 54431  | DNAJC10                     | Dnaj (Hsp40) homolog, subfamily C, member 10                          | -0.46 | CTCGACGGAATATAATGTTT   | NM_018981: | NM_018981:                               |
| 54431  | DNAJC10                     | Dnaj (Hsp40) homolog, subfamily C, member 10                          | 0.07  | CAGCTTAAGTTTGGTACACTA  | NM_018981: | NM_018981:                               |
| 23317  | DNAJC13                     | Dnaj (Hsp40) homolog, subfamily C, member 13                          | -0.92 | TAGGTTGATCTCTCTCTTAA   | NM_015268: | NM_015268:                               |
| 23317  | DNAJC13                     | Dnaj (Hsp40) homolog, subfamily C, member 13                          | 0.14  | CTGAGTTAAITGGGAATGATA  | NM_015268: | NM_015268:                               |
| 85406  | DNAJC14                     | Dnaj (Hsp40) homolog, subfamily C, member 14                          | -0.08 | CTCCTTATCTGATATAATA    | NM_032364: | NM_032364:                               |
| 85406  | DNAJC14                     | Dnaj (Hsp40) homolog, subfamily C, member 14                          | -0.98 | TTGGTCAAGCAGAATATTA    | NM_032364: | NM_032364:                               |
| 23341  | DNAJC16                     | Dnaj (Hsp40) homolog, subfamily C, member 16                          | 0.13  | TACGAGATTTCTTCAAAATGA  | XM_497656: | NM_015291:                               |
| 23341  | DNAJC16                     | Dnaj (Hsp40) homolog, subfamily C, member 16                          | 0.17  | CAGGAGTTTGGCCGACACCTTA | XM_497656: | NM_015291:                               |
| 9829   | DNAJC6                      | Dnaj (Hsp40) homolog, subfamily C, member 6                           | -3.80 | AACCGTTAAGTTACTCATGAA  | XM_375737: | NM_015291:                               |
| 9829   | DNAJC6                      | Dnaj (Hsp40) homolog, subfamily C, member 6                           | 0.05  | TAGGTTTATTTTAAACGTA    | XM_375737: | NM_014783:                               |
| 1773   | DNASE1                      | deoxyribonuclease I                                                   | -0.07 | ACCTGTGCTTACAGAAAGAAA  | AJ298844:  | NM_005223:                               |
| 1773   | DNASE1                      | deoxyribonuclease I                                                   | -2.58 | TACCTGGATGCCAAGAGAAA   | AJ298844:  | NM_005223:                               |
| 1776   | DNASE1L3                    | deoxyribonuclease I-like 3                                            | -0.81 | AAGGCCCTTCAACACAGCAA   | NM_004944: | NM_004944:                               |
| 1776   | DNASE1L3                    | deoxyribonuclease I-like 3                                            | -0.36 | CACGGTGAAGAAAGACACCAA  | NM_004944: | NM_004944:                               |
| 1777   | DNASE2                      | deoxyribonuclease II, lysosomal                                       | 0.21  | AAGGCCACCACGTTAGCCAA   | NM_001375: | NM_001375:                               |
| 1777   | DNASE2                      | deoxyribonuclease II, lysosomal                                       | -2.30 | GACCTGATTGTGGCTTTAA    | NM_001375: | NM_001375:                               |
| 92737  | DNER                        | delta-notch-like EGF repeat-containing transmembrane                  | 0.63  | TAGAGTATACCCGTTACTTAA  | NM_139072: | NM_139072:                               |
| 92737  | DNER                        | delta-notch-like EGF repeat-containing transmembrane                  | -3.22 | TGGGATCTGCTTGTGAAGAAA  | NM_139072: | NM_139072:                               |
| 1759   | DNM1                        | dynamamin 1                                                           | -1.28 | CAGCTGGTCAATGCAACCCAA  | NM_004408: | NM_001005336;NM_004408:                  |
| 1759   | DNM1                        | dynamamin 1                                                           | -2.08 | CCGATTAACCGGAATTTCCA   | NM_004408: | NM_001005336;NM_004408:                  |
| 1786   | DNMT1                       | DNA (cytosine-5)-methyltransferase 1                                  | 0.71  | CCCATCGGTTCCGCGCGAAA   | NM_001379: | NM_001379:                               |
| 1786   | DNMT1                       | DNA (cytosine-5)-methyltransferase 1                                  | 1.13  | TCGCTTCAACTAATGATT     | NM_001379: | NM_001379:                               |
| 1787   | DNMT2                       | DNA (cytosine-5)-methyltransferase 2                                  | -1.10 | CACATTCGGTTGAGCAACATT  | NM_004412: | NM_176086;NM_176084;NM_176085;NM_176081: |
| 1787   | DNMT2                       | DNA (cytosine-5)-methyltransferase 2                                  | 2.22  | AGCGTTATCGCCTACTTGGAA  | NM_004412: | NM_176083;NM_004412:                     |
| 1788   | DNMT3A                      | DNA (cytosine-5)-methyltransferase 3 alpha                            | -1.08 | AACACCGGATCTATGTTTAA   | NM_022552: | NM_176086;NM_176084;NM_176085;NM_176081: |
| 1788   | DNMT3A                      | DNA (cytosine-5)-methyltransferase 3 alpha                            | -3.85 | CAGAACAGCCCATGATTGAA   | NM_022552: | NM_176083;NM_004412:                     |
| 1789   | DNMT3B                      | DNA (cytosine-5)-methyltransferase 3 beta                             | -1.46 | AAGGACTACTTTGACGTGAA   | NM_006892: | NM_022552;NM_175630;NM_175629:           |
| 1789   | DNMT3B                      | DNA (cytosine-5)-methyltransferase 3 beta                             | 0.02  | TAGAGTTACCTTATGTTTAA   | NM_006892: | NM_006892;NM_175850;NM_175848;NM_175849: |
| 29947  | DNMT3L                      | DNA (cytosine-5)-methyltransferase 3-like                             | 0.54  | AAGGCTAACCCAGGAAATATA  | NM_013369: | NM_006892;NM_175850;NM_175848;NM_175849: |
| 29947  | DNMT3L                      | DNA (cytosine-5)-methyltransferase 3-like                             | -0.39 | AAGCATGTGGTTGATGTCACA  | NM_013369: | NM_175867;NM_013369:                     |
| 23549  | DNPEP                       | aspartyl aminopeptidase                                               | 0.05  | AAGTGGATTTGTCACTCAGAAA | NM_012100: | NM_012100:                               |
| 23549  | DNPEP                       | aspartyl aminopeptidase                                               | 0.33  | GAGCTGAAGCTGGATTATTA   | NM_012100: | NM_012100:                               |
| 30836  | DNTTIP2                     | deoxynucleotidyltransferase, terminal, interacting protein 2          | -0.38 | AAGAAGAAATTCGCAATTA    | NM_014597: | NM_014597:                               |
| 30836  | DNTTIP2                     | deoxynucleotidyltransferase, terminal, interacting protein 2          | -0.77 | CACGAACAGGCCAATGTTGAA  | NM_014597: | NM_014597:                               |
| 1793   | DOCK1                       | dedicator of cytokinesis 1                                            | 0.07  | ACGATCGTCAACGATGTGAAA  | NM_001380: | NM_001380:                               |
| 1793   | DOCK1                       | dedicator of cytokinesis 1                                            | -0.27 | CACGCTGGTTTGTAGACTTTA  | NM_001380: | NM_001380:                               |
| 1794   | DOCK2                       | dedicator of cytokinesis 2                                            | 0.15  | AACGTAGATTCCTGAAGCTAA  | NM_004946: | NM_004946:                               |
| 1794   | DOCK2                       | dedicator of cytokinesis 2                                            | -0.93 | CAGGTCCTCTCGGAGACTAT   | NM_004946: | NM_004946:                               |
| 1796   | DOCK1                       | docking protein 1, 62kDa (downstream of tyrosine kinase 1)            | -0.93 | AGGGATCAAAGAAAGATGGTTA | NM_001381: | NM_001381:                               |
| 1796   | DOCK1                       | docking protein 1, 62kDa (downstream of tyrosine kinase 1)            | 2.18  | CGCCTGGACTGCAAAAGTAT   | NM_001381: | NM_001381:                               |
| 9046   | DOCK2                       | docking protein 2, 56kDa                                              | 1.38  | CAGATTTCTGGTGGCATTAA   | NM_201349: | NM_201349;NM_003974:                     |

|        |         |                                                                    |       |                        |            |                                                                             |
|--------|---------|--------------------------------------------------------------------|-------|------------------------|------------|-----------------------------------------------------------------------------|
| 9046   | DOK2    | docking protein 2, 56kDa                                           | -0.56 | CAGCAGACGTTTGGAAAGAAA  | NM_201349: | NM_201349:NM_003974:                                                        |
| 79930  | DOK3    | docking protein 3                                                  | 1.18  | TGCAGACTCAGAGATAATAAA  | NM_024872: | NM_024872:                                                                  |
| 79930  | DOK3    | docking protein 3                                                  | -1.58 | CCCAGGCAATGAGCACCTCTA  | NM_024872: | NM_024872:                                                                  |
| 55715  | DOK4    | docking protein 4                                                  | 0.01  | CTGGATTTTGGTACTACCAT   | NM_018110: | NM_018110:                                                                  |
| 55715  | DOK4    | docking protein 4                                                  | 0.11  | CCCTGCTGCAATGCAATTTAAA | NM_018110: | NM_018110:                                                                  |
| 55816  | DOK5    | docking protein 5                                                  | 2.00  | TCAGGTGTTATCATAGGTTA   | NM_018431: | NM_177959:NM_018431:                                                        |
| 55816  | DOK5    | docking protein 5                                                  | 0.26  | GACAGTCAGTATTGACAATAA  | NM_018431: | NM_177959:NM_018431:                                                        |
| 220164 | DOK6    | docking protein 6                                                  | -0.15 | CTGAGCAACATGAAAGATTAA  | NM_152721: | NM_152721:                                                                  |
| 220164 | DOK6    | docking protein 6                                                  | 1.88  | AACCATAATTTGGTGCAITAA  | NM_152721: | NM_152721:                                                                  |
| 57171  | DOLPP1  | dolichyl pyrophosphate phosphatase 1                               | 0.54  | AAGAATGACCAAAACAAACAA  | NM_020438: | NM_020438:                                                                  |
| 57171  | DOLPP1  | dolichyl pyrophosphate phosphatase 1                               | 0.73  | CAGGGTCTACCTGCTGTACCA  | NM_020438: | NM_020438:                                                                  |
| 23033  | DOPEY1  | dopey family member 1                                              | 1.08  | CCGGAGTCTATGTACATAGA   | NM_015018: | NM_015018:                                                                  |
| 23033  | DOPEY1  | dopey family member 1                                              | -0.03 | CCGGATTTCTGTTATGGGCAA  | NM_015018: | NM_015018:                                                                  |
| 84444  | DOT1L   | DOT1-like, histone H3 methyltransferase (S. cerevisiae)            | -0.05 | CCGCTGCCGGTCTACGATAAA  | NM_032482: | NM_032482:                                                                  |
| 84444  | DOT1L   | DOT1-like, histone H3 methyltransferase (S. cerevisiae)            | -1.68 | CCGGCTTGGTCAAGCAGAAA   | NM_032482: | NM_032482:                                                                  |
| 64174  | DPEP2   | dipeptidase 2                                                      | 0.34  | CAGGCACAAATATTTCTTGAA  | NM_022355: | NM_022355:                                                                  |
| 64174  | DPEP2   | dipeptidase 2                                                      | 0.98  | CAAGGCTGTCATGGATCCAA   | NM_022355: | NM_022355:                                                                  |
| 64180  | DPEP3   | dipeptidase 3                                                      | 1.57  | ATGCTGAGATAAACATGTGTA  | NM_022357: | NM_022357:                                                                  |
| 64180  | DPEP3   | dipeptidase 3                                                      | 0.11  | CAAGCATATGCTGAGAATAAA  | NM_022357: | NM_022357:                                                                  |
| 8193   | DPF1    | D4, zinc and double PHD fingers family 1                           | 0.21  | CAGGAGGAAGAACAGGGCCAA  | NM_004647: | NM_004647:                                                                  |
| 8193   | DPF1    | D4, zinc and double PHD fingers family 1                           | -1.23 | CCGCATGACCTCGAGGTGGAA  | NM_004647: | NM_004647:                                                                  |
| 5977   | DPF2    | D4, zinc and double PHD fingers family 2                           | -2.86 | CTGGACCTGTTGAAAGAGAAA  | NM_006268: | NM_006268:                                                                  |
| 5977   | DPF2    | D4, zinc and double PHD fingers family 2                           | -1.02 | CTGGATGACCTCGATGATGAA  | NM_006268: | NM_006268:                                                                  |
| 57628  | DPP10   | dipeptidyl-peptidase 10                                            | -0.17 | TTGCATTAATGCACAATCTA   | NM_020868: | NM_020868:NM_001004360:                                                     |
| 57628  | DPP10   | dipeptidyl-peptidase 10                                            | 0.56  | CAGAATGTCAAGGGCAGCTTA  | NM_020868: | NM_020868:NM_001004360:                                                     |
| 10072  | DPP3    | dipeptidyl-peptidase 3                                             | -0.02 | CACGTGACAGCTAGGGTTCAA  | NM_005700: | NM_130443:NM_005700:                                                        |
| 10072  | DPP3    | dipeptidyl-peptidase 3                                             | 0.40  | CCGAGGAGAATTTGAAAGTTT  | NM_005700: | NM_005700:                                                                  |
| 1803   | DPP4    | dipeptidyl-peptidase 4 (CD26, adenosine deaminase complexing prote | -2.41 | ATCGGGAAGTGGCGTGTTCAA  | NM_001935: | NM_001935:                                                                  |
| 1803   | DPP4    | dipeptidyl-peptidase 4 (CD26, adenosine deaminase complexing prote | 0.44  | CAGTAAGAGGGCAGAGTATTA  | NM_001935: | NM_001935:                                                                  |
| 1804   | DPP6    | dipeptidyl-peptidase 6                                             | -0.06 | ACGCTAATGTTAATCTGATA   | NM_001936: | NM_001936:NM_130797:                                                        |
| 1804   | DPP6    | dipeptidyl-peptidase 6                                             | 0.43  | TCCCTACACGTTATGGCTTA   | NM_001936: | NM_001936:NM_130797:                                                        |
| 54878  | DPP8    | dipeptidyl-peptidase 8                                             | -1.17 | ACGGTTTGGTGAATGATCTA   | NM_017743: | NM_130434:NM_017743:NM_197961:                                              |
| 54878  | DPP8    | dipeptidyl-peptidase 8                                             | 0.53  | CTGGGTGTGAGATATTGAA    | NM_017743: | NM_130434:NM_017743:NM_197960:NM_197961:                                    |
| 91039  | DPP9    | dipeptidyl-peptidase 9                                             | -1.87 | CACCTCAATATTATGGAAA    | NM_139159: | NM_139159:                                                                  |
| 91039  | DPP9    | dipeptidyl-peptidase 9                                             | -0.52 | CCGAGAGAACTCCCTCCTCTA  | NM_139159: | NM_139159:                                                                  |
| 1806   | DPYD    | dihydropyrimidine dehydrogenase                                    | 0.76  | TCGAGAGTACTCGCTTTTAA   | NM_000110: | NM_000110:                                                                  |
| 1806   | DPYD    | dihydropyrimidine dehydrogenase                                    | -0.82 | TCGGTGAATGATGAAAGCAA   | NM_000110: | NM_000110:                                                                  |
| 1807   | DPYS    | dihydropyrimidinase                                                | 0.44  | CGGCAGGAGATGGGAAGTTTA  | NM_001385: | NM_001385:                                                                  |
| 1807   | DPYS    | dihydropyrimidinase                                                | 1.10  | TGGGAAGTTTATTCCTCGAAA  | NM_001385: | NM_001385:                                                                  |
| 1808   | DPYSL2  | dihydropyrimidinase-like 2                                         | -0.19 | CTCGTGTTTATTTCTTAA     | NM_001386: | NM_001386:                                                                  |
| 1808   | DPYSL2  | dihydropyrimidinase-like 2                                         | -1.85 | CAGCGTTCGCTTATTTGGCTA  | NM_001386: | NM_001386:                                                                  |
| 1812   | DRD1    | dopamine receptor D1                                               | -0.97 | ACGGTGAATCAATAACAAT    | NM_000794: | NM_000794:                                                                  |
| 1812   | DRD1    | dopamine receptor D1                                               | 0.27  | GACGGTGAATCAATAACAAT   | NM_000794: | NM_000794:                                                                  |
| 50632  | DRD1IP  | dopamine receptor D1 interacting protein                           | -2.02 | CTGGTGTGATCATGTACAAA   | NM_015722: | NM_015722:                                                                  |
| 50632  | DRD1IP  | dopamine receptor D1 interacting protein                           | 0.37  | CCAGGTGGTCATCAAGACACA  | NM_015722: | NM_015722:                                                                  |
| 1813   | DRD2    | dopamine receptor D2                                               | -0.07 | CACCGTTATCATGAAGTCTAA  | NM_000795: | NM_000795:                                                                  |
| 1813   | DRD2    | dopamine receptor D2                                               | -1.71 | CACGGTAAAGAGGCTGCTGAA  | NM_000795: | NM_016574:NM_000795:                                                        |
| 1814   | DRD3    | dopamine receptor D3                                               | 0.36  | ATGGCAGATTATCGACATCTT  | NM_000796: | NM_033658:NM_000796:NM_033659:NM_033660:                                    |
| 1814   | DRD3    | dopamine receptor D3                                               | 2.07  | CAGGTGGAGTCTGGAATTTCA  | NM_000796: | NM_033663:NM_033658:NM_000796:NM_033659:                                    |
| 1815   | DRD4    | dopamine receptor D4                                               | -0.37 | CACCTGGCTGGGCTACGTCAA  | NM_000797: | NM_000797:                                                                  |
| 1815   | DRD4    | dopamine receptor D4                                               | -2.51 | TTGTACGTTAATAAACAAAT   | NM_000797: | NM_000797:                                                                  |
| 1816   | DRD5    | dopamine receptor D5                                               | 1.22  | CGGGCTGGACCTGCCAAACAA  | NM_000798: | NM_000798:                                                                  |
| 1816   | DRD5    | dopamine receptor D5                                               | 0.85  | CTGATTTATCTGGGTGCTAA   | NM_000798: | NM_000798:                                                                  |
| 57453  | DSCAML1 | Down syndrome cell adhesion molecule like 1                        | 0.22  | TGATTTGGTGCACCCCAA     | NM_020693: | NM_020693:                                                                  |
| 57453  | DSCAML1 | Down syndrome cell adhesion molecule like 1                        | -1.68 | CAGGGTCATCGGCTATCCCTA  | NM_020693: | NM_020693:                                                                  |
| 1828   | DSG1    | desmoglein 1                                                       | -1.49 | CACGTTACGATAACCGACCA   | NM_001942: | NM_001942:                                                                  |
| 1828   | DSG1    | desmoglein 1                                                       | -3.92 | CCCGTGTAGTGACACCCCA    | NM_001942: | NM_001942:                                                                  |
| 1832   | DSP     | desmoplakin                                                        | 0.42  | AAGGGCCACGGTATTCGCTTA  | NM_004415: | NM_004415:NM_001008844:                                                     |
| 1832   | DSP     | desmoplakin                                                        | -3.35 | CCGACATGAATCAGTAAGTAA  | NM_004415: | NM_004415:NM_001008844:                                                     |
| 1834   | DSPP    | dentin sialophosphoprotein                                         | -0.43 | TCGGATAGTAAAGAAATATAT  | NM_014208: | NM_014208:                                                                  |
| 1834   | DSPP    | dentin sialophosphoprotein                                         | -0.29 | CATGATAGTACATAGGTCAA   | NM_014208: | NM_014208:                                                                  |
| 51514  | DTL     | denticleless homolog (Drosophila)                                  | -1.64 | CCCAATATGGAACATGTACTA  | NM_016448: | NM_016448:                                                                  |
| 51514  | DTL     | denticleless homolog (Drosophila)                                  | 0.24  | CCGAGTCTACTGGGTAATAAA  | NM_016448: | NM_016448:                                                                  |
| 1837   | DTNA    | dystrobrevin, alpha                                                | 0.86  | CCCGTTCATAGCTATTTCAA   | NM_001390: | NM_032980:NM_001390:NM_032975:                                              |
| 1837   | DTNA    | dystrobrevin, alpha                                                | 1.44  | TGGACCTATTCAATACATTA   | NM_001390: | NM_032980:NM_001390:NM_032975:                                              |
| 84062  | DTNBP1  | dystrobrevin binding protein 1                                     | -0.68 | TTGGCTGTATGGCGAATTTCCA | NM_032122: | NM_183041:NM_032122:                                                        |
| 84062  | DTNBP1  | dystrobrevin binding protein 1                                     | -1.65 | CACCCAGCAATGAAGCTGAA   | NM_032122: | NM_183040:NM_183041:NM_032122:                                              |
| 1840   | DTX1    | deltex homolog 1 (Drosophila)                                      | -1.42 | GACCAAGAAAGACACCTTAA   | NM_004416: | NM_004416:                                                                  |
| 1840   | DTX1    | deltex homolog 1 (Drosophila)                                      | 1.12  | GTGGGAGTCAAGCAAGATTTA  | NM_004416: | NM_004416:                                                                  |
| 113878 | DTX2    | deltex homolog 2 (Drosophila)                                      | -3.84 | CAAGCAGAGATGGACCGCAA   | NM_020892: | NM_020892:                                                                  |
| 113878 | DTX2    | deltex homolog 2 (Drosophila)                                      | 2.20  | CGGGACATCCTCATAGTTTA   | NM_020892: | NM_020892:                                                                  |
| 196403 | DTX3    | deltex 3 homolog (Drosophila)                                      | -1.39 | ACCGAATGTCATCACCTGGAA  | NM_178502: | NM_178502:                                                                  |
| 196403 | DTX3    | deltex 3 homolog (Drosophila)                                      | 0.03  | CGGCACCATTTGCTATCCAGTA | NM_178502: | NM_178502:                                                                  |
| 151636 | DTX3L   | deltex 3-like (Drosophila)                                         | 1.18  | TGGCAAGCATTGGTAATAAA   | NM_138287: | NM_138287:                                                                  |
| 151636 | DTX3L   | deltex 3-like (Drosophila)                                         | 1.18  | TGGAATGATATCCACCAAAA   | NM_138287: | NM_138287:                                                                  |
| 23220  | DTX4    | deltex 4 homolog (Drosophila)                                      | -7.56 | TAGCTACGTAATGACTTCAA   | XM_166213: | XM_166213:                                                                  |
| 23220  | DTX4    | deltex 4 homolog (Drosophila)                                      | -5.65 | CCCGCATTACAGGACCGGAA   | XM_166213: | XM_166213:                                                                  |
| 1841   | DTYMK   | deoxythymidylate kinase (thymidylate kinase)                       | 0.06  | ATCAGTTGGAATCTCTCAA    | NM_012145: | NM_012145:                                                                  |
| 1841   | DTYMK   | deoxythymidylate kinase (thymidylate kinase)                       | -0.85 | TCCGGAAAGATCAACTGAAA   | NM_012145: | NM_012145:                                                                  |
| 53905  | DUOX1   | dual oxidase 1                                                     | 0.25  | CCAGTCTAACACCACCAACTAA | NM_017434: | NM_017434:NM_175940:                                                        |
| 53905  | DUOX1   | dual oxidase 1                                                     | -3.35 | TGGCGGAGGTTTGGCAAGAA   | NM_017434: | NM_017434:NM_175940:                                                        |
| 50506  | DUOX2   | dual oxidase 2                                                     | 1.43  | ACATCGAGGTATAATAAATAA  | NM_014080: | NM_014080:                                                                  |
| 50506  | DUOX2   | dual oxidase 2                                                     | 0.58  | ATGGTATTAGAGATATCTTTA  | NM_014080: | NM_014080:                                                                  |
| 1843   | DUSP1   | dual specificity phosphatase 1                                     | 0.24  | TAGCGTCAAGACATTGGCTGA  | NM_004417: | NM_004417:                                                                  |
| 1843   | DUSP1   | dual specificity phosphatase 1                                     | 0.36  | CTGTACTATCCTGTAATATA   | NM_004417: | NM_004417:                                                                  |
| 11221  | DUSP10  | dual specificity phosphatase 10                                    | 0.56  | ATGAGAATACAGGCTCTCTAA  | NM_007207: | NM_007207:                                                                  |
| 11221  | DUSP10  | dual specificity phosphatase 10                                    | -0.76 | CAGGTTCAATAGCCGGAAGATA | NM_007207: | NM_144728:NM_007207:NM_144729:                                              |
| 8446   | DUSP11  | dual specificity phosphatase 11 (RNA/RNP complex 1-interacting)    | 0.15  | CAGAAGCTTTCCTACTTAA    | NM_003584: | NM_003584:                                                                  |
| 8446   | DUSP11  | dual specificity phosphatase 11 (RNA/RNP complex 1-interacting)    | -1.13 | CCCTTATGATTTCAAGCTTAA  | NM_003584: | NM_003584:                                                                  |
| 11266  | DUSP12  | dual specificity phosphatase 12                                    | 0.49  | ATGCTTACATGCCAATCAAA   | NM_007240: | NM_007240:                                                                  |
| 11266  | DUSP12  | dual specificity phosphatase 12                                    | 0.62  | TACCGTTTCAAGAGTTGAA    | NM_007240: | NM_007240:                                                                  |
| 51207  | DUSP13  | dual specificity phosphatase 13                                    | -2.19 | ACCCTGAGATGATAAACAGCAA | NM_016364: | NM_001007271:NM_001007273:NM_001007272:NM_001007274:NM_016364:NM_001007275: |
| 51207  | DUSP13  | dual specificity phosphatase 13                                    | 0.69  | TCAGTCCATCTCTATAATAAA  | NM_016364: | NM_001007271:NM_001007273:NM_001007272:NM_001007274:NM_016364:NM_001007275: |
| 11072  | DUSP14  | dual specificity phosphatase 14                                    | 1.14  | AAGGAATGCATACATGTGCTA  | NM_007026: | NM_007026:                                                                  |

|        |               |                                                                        |       |                        |            |                                                                                                                  |
|--------|---------------|------------------------------------------------------------------------|-------|------------------------|------------|------------------------------------------------------------------------------------------------------------------|
| 11072  | DUSP14        | dual specificity phosphatase 14                                        | 0.15  | ACCCTTATTATTAGCTGTTA   | NM_007026: | NM_007026:                                                                                                       |
| 128853 | DUSP15        | dual specificity phosphatase 15                                        | 0.44  | ACGGCCCTGGAGGATTAFAA   | NM_177991: | NM_177991:NM_001012644:NM_080611:                                                                                |
| 128853 | DUSP15        | dual specificity phosphatase 15                                        | 2.23  | CACCACGATTGTGACACGCGTA | NM_177991: | NM_177991:NM_001012644:NM_080611:                                                                                |
| 80824  | DUSP16        | dual specificity phosphatase 16                                        | 0.18  | AAGGTTGATGTTTACAGTCAA  | NM_030640: | NM_030640:                                                                                                       |
| 80824  | DUSP16        | dual specificity phosphatase 16                                        | 0.38  | CCGGCCATTGTGGAATACAAA  | NM_030640: | NM_030640:                                                                                                       |
| 150290 | DUSP18        | dual specificity phosphatase 18                                        | 1.64  | ACGGCTCTCTCCCGAAGAAA   | NM_152511: | NM_152511:                                                                                                       |
| 150290 | DUSP18        | dual specificity phosphatase 18                                        | 0.55  | CCAGATCACCATGGTCATCAA  | NM_152511: | NM_152511:                                                                                                       |
| 142679 | DUSP19        | dual specificity phosphatase 19                                        | 0.03  | ATGGTCAGTATCACTGGATAA  | NM_080876: | NM_080876:                                                                                                       |
| 142679 | DUSP19        | dual specificity phosphatase 19                                        | -1.84 | CAGAGTTAAACCTAATGAGTCA | NM_080876: | NM_080876:                                                                                                       |
| 1844   | DUSP2         | dual specificity phosphatase 2                                         | 0.35  | CAGCCTGAGAGCTCCAAAGGAA | NM_004418: | NM_004418:                                                                                                       |
| 1844   | DUSP2         | dual specificity phosphatase 2                                         | -0.05 | CTGGTCCACCACCATGTTGAA  | NM_004418: | NM_004418:                                                                                                       |
| 63904  | DUSP21        | dual specificity phosphatase 21                                        | 0.20  | AACGTAGTAAGCCTTACCCTTA | NM_022076: | NM_022076:                                                                                                       |
| 63904  | DUSP21        | dual specificity phosphatase 21                                        | -0.22 | TCGGTGAAGTGGTCAACGTA   | NM_022076: | NM_022076:                                                                                                       |
| 56940  | DUSP22        | dual specificity phosphatase 22                                        | -5.71 | CATGTTTATGTTGAGAAGCTAA | NM_020185: | NM_020185:                                                                                                       |
| 56940  | DUSP22        | dual specificity phosphatase 22                                        | 0.37  | GGGCACTTAGCCCAAGTTTAA  | NM_020185: | NM_020185:                                                                                                       |
| 54935  | DUSP23        | dual specificity phosphatase 23                                        | -0.02 | CAGTCTACCAGCGAACAAGAAA | NM_017823: | NM_017823:                                                                                                       |
| 54935  | DUSP23        | dual specificity phosphatase 23                                        | 0.10  | GAAGTGGACTAAAGTATTAATA | NM_017823: | NM_017823:                                                                                                       |
| 78986  | DUSP26        | dual specificity phosphatase 26 (putative)                             | -0.26 | TCCAAGCGTCTCGAGGATAAAA | NM_024025: | NM_024025:                                                                                                       |
| 78986  | DUSP26        | dual specificity phosphatase 26 (putative)                             | -3.88 | CAGCAAGAGATGGTGTGAAA   | NM_024025: | NM_024025:                                                                                                       |
| 92235  | DUSP27 (dua   | dual specificity phosphatase 27 (putative)                             | -3.44 | CAGAAGTGGATTGCCAATGTA  | XM_043739: | XM_043739:                                                                                                       |
| 92235  | DUSP27 (dua   | dual specificity phosphatase 27 (putative)                             | 0.14  | TCCGATATTCCTCCCGAGTA   | XM_043739: | XM_043739:                                                                                                       |
| 1845   | DUSP3         | dual specificity phosphatase 3 (vaccinia virus phosphatase VH1-relate  | 1.68  | CCCGCGGATCTACGTGGGCAA  | NM_004090: | NM_004090:                                                                                                       |
| 1845   | DUSP3         | dual specificity phosphatase 3 (vaccinia virus phosphatase VH1-relate  | 1.82  | CCGTATTTACTTAACAAGATT  | NM_004090: | NM_004090:                                                                                                       |
| 1848   | DUSP6         | dual specificity phosphatase 6                                         | 2.13  | CTGCATTGGAGACCAATCTA   | NM_001946: | NM_001946:                                                                                                       |
| 1848   | DUSP6         | dual specificity phosphatase 6                                         | 3.19  | TACGGACACTATTATCACTAA  | NM_001946: | NM_001946:NM_022652:                                                                                             |
| 1849   | DUSP7         | dual specificity phosphatase 7                                         | 3.25  | CAAGGTGGTTTCAACAAGTTT  | NM_001947: | NM_001947:                                                                                                       |
| 1849   | DUSP7         | dual specificity phosphatase 7                                         | -7.81 | CGGCGGCGAGTTCACCTACAA  | NM_001947: | NM_001947:                                                                                                       |
| 1850   | DUSP8         | dual specificity phosphatase 8                                         | 3.59  | CCGCTCCTCGTGGAGTACAA   | NM_004420: | NM_004420:                                                                                                       |
| 1850   | DUSP8         | dual specificity phosphatase 8                                         | 3.31  | TCCATCGAGTTCATCGATAAA  | NM_004420: | NM_004420:                                                                                                       |
| 1854   | DUT           | dUTP pyrophosphatase                                                   | -3.52 | AAGCCTTGGATGACACCGAAA  | NM_001948: | NM_001948:NM_001025248:NM_001025249:                                                                             |
| 1854   | DUT           | dUTP pyrophosphatase                                                   | -3.31 | TCCCTCTCTCCACTAGTCTA   | NM_001948: | NM_001948:NM_001025248:NM_001025249:                                                                             |
| 1855   | DVL1          | dishevelled, dsh homolog 1 (Drosophila)                                | -0.26 | CAGCGTTAGATGGTTAACAT   | NM_004421: | NM_181870:NM_182779:NM_004421:                                                                                   |
| 1855   | DVL1          | dishevelled, dsh homolog 1 (Drosophila)                                | 0.74  | CTGGAGTAGGGATCTAATTTA  | NM_004421: | NM_181870:NM_182779:NM_004421:                                                                                   |
| 1856   | DVL2 (dishev  | dishevelled, dsh homolog 2 (Drosophila)                                | -2.57 | CTGGGAGATTTGGGCCATGTA  | NM_004422: | NM_004422:                                                                                                       |
| 1856   | DVL2 (dishev  | dishevelled, dsh homolog 2 (Drosophila)                                | -2.83 | CACGCTAAACATGGAGAAAGTA | NM_004422: | NM_004422:                                                                                                       |
| 1857   | DVL3          | dishevelled, dsh homolog 3 (Drosophila)                                | -2.14 | ACCAAGATATGTTCCCTCGTAA | NM_004423: | NM_004423:                                                                                                       |
| 1857   | DVL3          | dishevelled, dsh homolog 3 (Drosophila)                                | 0.56  | CTCCTGGTTACTTCATCAAAA  | NM_004423: | NM_004423:                                                                                                       |
| 1778   | DYNC1H1       | dynein, cytoplasmic 1, heavy chain 1                                   | -1.52 | CAGGTGGGTGACATTACGAA   | NM_001376: | NM_001376:                                                                                                       |
| 1778   | DYNC1H1       | dynein, cytoplasmic 1, heavy chain 1                                   | -4.52 | CAGGAGGTAATTGCAGACAAA  | NM_001376: | NM_001376:                                                                                                       |
| 1783   | DYNC1L12      | dynein, cytoplasmic 1, light intermediate chain 2                      | 0.40  | TAGAATGATAATTGGGTATA   | NM_006141: | NM_006141:                                                                                                       |
| 1783   | DYNC1L12      | dynein, cytoplasmic 1, light intermediate chain 2                      | 0.29  | TCGACTTGTGTATAAGTATA   | NM_006141: | NM_006141:                                                                                                       |
| 1859   | DYRK1A        | dual-specificity tyrosine-(Y)-phosphorylation regulated kinase 1A      | -0.43 | CAAGAATGGGTTGCCATTAATA | NM_001396: | NM_001396:NM_130437:NM_130438:NM_101395:<br>NM_130436:<br>NM_001396:NM_130437:NM_130438:NM_101395:<br>NM_130436: |
| 1859   | DYRK1A        | dual-specificity tyrosine-(Y)-phosphorylation regulated kinase 1A      | -0.90 | TACGGTCGTGACTACTTGAA   | NM_001396: | NM_001396:                                                                                                       |
| 9149   | DYRK1B        | dual-specificity tyrosine-(Y)-phosphorylation regulated kinase 1B      | -2.90 | CACGGAGATGAAGTACTATAT  | NM_004714: | NM_006484:NM_004714:NM_006483:                                                                                   |
| 9149   | DYRK1B        | dual-specificity tyrosine-(Y)-phosphorylation regulated kinase 1B      | -5.52 | CCGGACCTACCGCTACAGCAA  | NM_004714: | NM_006484:NM_004714:NM_006483:                                                                                   |
| 8445   | DYRK2 (dual-  | dual-specificity tyrosine-(Y)-phosphorylation regulated kinase 2       | 2.28  | TAGAAGCGGATTAAGAAGTAA  | NM_003583: | NM_003583:NM_006482:                                                                                             |
| 8445   | DYRK2 (dual-  | dual-specificity tyrosine-(Y)-phosphorylation regulated kinase 2       | 0.88  | TGCACAGAGATTAATGTTATTA | NM_003583: | NM_003583:NM_006482:                                                                                             |
| 8444   | DYRK3         | dual-specificity tyrosine-(Y)-phosphorylation regulated kinase 3       | 3.01  | AGCCAAATAAGCTTAAAGCTAA | NM_003582: | NM_003582:NM_001004023:                                                                                          |
| 8444   | DYRK3         | dual-specificity tyrosine-(Y)-phosphorylation regulated kinase 3       | -0.75 | TGCACAGTACGTCGGCCCTAAA | NM_003582: | NM_003582:NM_001004023:                                                                                          |
| 8798   | DYRK4 (dual-  | dual-specificity tyrosine-(Y)-phosphorylation regulated kinase 4       | 0.58  | CTCCATATGAACAAGTGAATA  | NM_003845: | NM_003845:                                                                                                       |
| 8798   | DYRK4 (dual-  | dual-specificity tyrosine-(Y)-phosphorylation regulated kinase 4       | -1.44 | CTGCATACCGCGGAGTGTGTA  | NM_003845: | NM_003845:                                                                                                       |
| 9666   | DZIP3         | zinc finger DAZ interacting protein 3                                  | -1.30 | CTGGCTCAATTTTATATGCTA  | NM_014648: | NM_014648:                                                                                                       |
| 9666   | DZIP3         | zinc finger DAZ interacting protein 3                                  | -0.03 | CTGCTCAATTTGAAATATGTA  | NM_014648: | NM_014648:                                                                                                       |
| 1869   | E2F1          | E2F transcription factor 1                                             | -0.83 | ACGCTATGAGACCTCACTGAA  | NM_005225: | NM_005225:                                                                                                       |
| 1869   | E2F1          | E2F transcription factor 1                                             | -0.39 | CAGATGGTTATGGATCAAAA   | NM_005225: | NM_005225:                                                                                                       |
| 1870   | E2F2          | E2F transcription factor 2                                             | 0.15  | TTGAGACGAGGATTAATTTCA  | NM_004091: | NM_004091:                                                                                                       |
| 1870   | E2F2          | E2F transcription factor 2                                             | 0.77  | TAGGGACCAAGTACACTTTAA  | NM_004091: | NM_004091:                                                                                                       |
| 1871   | E2F3          | E2F transcription factor 3                                             | 0.30  | TACAGTATTTGCGTTACTTTA  | NM_001949: | NM_001949:                                                                                                       |
| 1871   | E2F3          | E2F transcription factor 3                                             | 1.00  | TTGCGTTACTTTAAGTACTAA  | NM_001949: | NM_001949:                                                                                                       |
| 1874   | E2F4          | E2F transcription factor 4, p107/p130-binding                          | -0.02 | AGGTATCGGGCTAATCGAGAAA | NM_001950: | NM_001950:                                                                                                       |
| 1874   | E2F4          | E2F transcription factor 4, p107/p130-binding                          | -1.18 | AACGAATGGATTCTATATATA  | NM_001950: | NM_001950:                                                                                                       |
| 1875   | E2F5          | E2F transcription factor 5, p130-binding                               | 0.31  | AAGGACTCAATCTGTCTCTTA  | NM_001951: | NM_001951:                                                                                                       |
| 1875   | E2F5          | E2F transcription factor 5, p130-binding                               | 0.97  | CAACTTTAATTTAGATGATAA  | NM_001951: | NM_001951:                                                                                                       |
| 79733  | E2F8          | E2F transcription factor 8                                             | 0.66  | CACGTGGGAAACCAACTTTA   | NM_024680: | NM_024680:                                                                                                       |
| 79733  | E2F8          | E2F transcription factor 8                                             | 2.23  | CAGAGGATGTCATTAATCAA   | NM_024680: | NM_024680:                                                                                                       |
| 85403  | EAF1 (ELL as  | ELL associated factor 1                                                | -1.50 | AACCAATAGTTGGAAGACAAA  | NM_033083: | NM_033083:                                                                                                       |
| 85403  | EAF1 (ELL as  | ELL associated factor 1                                                | -1.92 | TAGCTGAATTCAGTCCCTAA   | NM_033083: | NM_033083:                                                                                                       |
| 9166   | EBAG9         | estrogen receptor binding site associated, antigen, 9                  | 0.94  | CACCCAGTTTGGTTATTTTAA  | NM_198120: | NM_004215:NM_198120:                                                                                             |
| 9166   | EBAG9         | estrogen receptor binding site associated, antigen, 9                  | 0.11  | CTCTTAGTATGAGACTGCAA   | NM_198120: | NM_004215:NM_198120:                                                                                             |
| 1880   | EBI2 (Epstein | Epstein-Barr virus induced gene 2 (lymphocyte-specific G protein-coupl | 0.52  | CACGAATAGCCTACTATGCAA  | NM_004951: | NM_004951:                                                                                                       |
| 1880   | EBI2 (Epstein | Epstein-Barr virus induced gene 2 (lymphocyte-specific G protein-coupl | -0.62 | TAGAAGGACTGAATAGATTA   | NM_004951: | NM_004951:                                                                                                       |
| 10148  | EBI3 (Epstein | Epstein-Barr virus induced gene 3                                      | -0.46 | CTGAAGTGTCACTGTGAGATA  | NM_005755: | NM_005755:                                                                                                       |
| 10148  | EBI3 (Epstein | Epstein-Barr virus induced gene 3                                      | 0.00  | CTGAGAAATGGAGATGACTA   | NM_005755: | NM_005755:                                                                                                       |
| 10682  | EBP           | emopamil binding protein (sterol isomerase)                            | -0.29 | ACTGGACAACCTTTGTACCTAA | NM_006579: | NM_006579:                                                                                                       |
| 10682  | EBP           | emopamil binding protein (sterol isomerase)                            | -0.14 | CACAGTGTGCATGGAACCACT  | NM_006579: | NM_006579:                                                                                                       |
| 11319  | ECD           | ecdysoneless homolog (Drosophila)                                      | -1.26 | CAGACTACCGATAACAATCTCA | NM_007265: | NM_007265:                                                                                                       |
| 11319  | ECD           | ecdysoneless homolog (Drosophila)                                      | -0.52 | CTGGTACGGGGAATCTGTTA   | NM_007265: | NM_007265:                                                                                                       |
| 1889   | ECE1          | endothelin converting enzyme 1                                         | -4.07 | CCCGCCATGGTGAACGCCTA   | NM_001397: | NM_001397:                                                                                                       |
| 1889   | ECE1          | endothelin converting enzyme 1                                         | -2.38 | CAGATGCCTGCTCAACAACCTA | NM_001397: | NM_001397:                                                                                                       |
| 9718   | ECE2          | endothelin converting enzyme 2                                         | -4.95 | CACGTTGACCCGCAAGGCAA   | NM_014693: | NM_001037324:NM_014693:                                                                                          |
| 9718   | ECE2          | endothelin converting enzyme 2                                         | -1.46 | CACGGAACCAAGCATCTCGAA  | NM_014693: | NM_001037324:NM_014693:                                                                                          |
| 9427   | ECEL1         | endothelin converting enzyme-like 1                                    | 0.70  | CTGCAAGTCTGCTCAATAAAA  | NM_004826: | NM_004826:                                                                                                       |
| 9427   | ECEL1         | endothelin converting enzyme-like 1                                    | -9.04 | CAGGTGCTGACTGACAAGCAT  | NM_004826: | NM_004826:                                                                                                       |
| 1890   | ECGF1         | endothelial cell growth factor 1 (platelet-derived)                    | -0.36 | CACAGCCTCATTCTCAGTAA   | NM_001953: | NM_001953:                                                                                                       |
| 1894   | ECT2          | epithelial cell transforming sequence 2 oncogene                       | 0.22  | CTCAATTTATGCAGAGATTA   | NM_018098: | NM_018098:                                                                                                       |
| 1894   | ECT2          | epithelial cell transforming sequence 2 oncogene                       | -0.93 | TTGCTAGAGATAGCAAGAAA   | NM_018098: | NM_018098:                                                                                                       |
| 1896   | EDA           | ectodysplasin A                                                        | 0.78  | CTGGATGTAAAGTTGTGTA    | NM_001399: | NM_001399:NM_001005609:<br>NM_001005610:NM_001005611:NM_001005612:NM_001399:NM_001005609:                        |
| 1896   | EDA           | ectodysplasin A                                                        | 2.10  | AGGCGTGTGCGCGCAATAAA   | NM_001399: | NM_001005610:NM_001005611:NM_001005612:NM_001399:NM_001005609:                                                   |
| 60401  | EDA2R         | ectodysplasin A2 receptor                                              | 0.15  | CCAATGATCAGATTAATAAAA  | NM_021783: | NM_021783:                                                                                                       |
| 60401  | EDA2R         | ectodysplasin A2 receptor                                              | 0.50  | ACCAATTTGATCAGATTAATA  | NM_021783: | NM_021783:                                                                                                       |
| 10913  | EDAR          | ectodysplasin A receptor                                               | 0.04  | CCAGGTATTTATTCAGGTTTA  | NM_022336: | NM_022336:                                                                                                       |
| 10913  | EDAR          | ectodysplasin A receptor                                               | 1.39  | CAGAACATGAGATCATAATA   | NM_022336: | NM_022336:                                                                                                       |
| 128178 | EDARADD (E    | EDAR-associated death domain                                           | 1.02  | CTGAAATACGGTAAAGATTTA  | NM_080738: | NM_080738:NM_145861:                                                                                             |
| 128178 | EDARADD (E    | EDAR-associated death domain                                           | 0.65  | CCCTAGCCTTTATCCTTTAA   | NM_080738: | NM_080738:NM_145861:                                                                                             |
| 51366  | EDD1          | E3 ubiquitin protein ligase, HECT domain containing, 1                 | -0.56 | TGCGGTGAAGCTCAATGTGCAA | NM_015902: | NM_015902:                                                                                                       |
| 51366  | EDD1          | E3 ubiquitin protein ligase, HECT domain containing, 1                 | 0.42  | AGGCGTGTGCAATATCTTAA   | NM_015902: | NM_015902:                                                                                                       |

|        |         |                                                                                      |       |                        |            |                                          |
|--------|---------|--------------------------------------------------------------------------------------|-------|------------------------|------------|------------------------------------------|
| 8721   | EDF1    | endothelial differentiation-related factor 1                                         | -0.55 | CACGGTGACGGTGCTGCGCAA  | NM_003792: | NM_003792.NM_153200:                     |
| 8721   | EDF1    | endothelial differentiation-related factor 1                                         | -1.88 | CAGAAGGACCTGGCCACGAAA  | NM_003792: | NM_003792.NM_153200:                     |
| 1901   | EDG1    | endothelial differentiation, sphingolipid G-protein-coupled receptor, 1              | 1.07  | ATGATCGATCATCTATAGCAA  | NM_001400: | NM_001400:                               |
| 1901   | EDG1    | endothelial differentiation, sphingolipid G-protein-coupled receptor, 1              | -1.53 | TAGCATTGTCAAGCTCCTAAA  | NM_001400: | NM_001400:                               |
| 1902   | EDG2    | endothelial differentiation, lysophosphatidic acid G-protein-coupled receptor        | 1.68  | CAAGCATGTATATATTGAA    | NM_001401: | NM_001401.NM_057159:                     |
| 1902   | EDG2    | endothelial differentiation, lysophosphatidic acid G-protein-coupled receptor        | 0.23  | CACATAATATTGTTCCCAT    | NM_001401: | NM_001401.NM_057159:                     |
| 1903   | EDG3    | endothelial differentiation, sphingolipid G-protein-coupled receptor, 3              | -2.27 | CGGCAGTATCTAAGTATCTCA  | NM_005226: | NM_005226:                               |
| 1903   | EDG3    | endothelial differentiation, sphingolipid G-protein-coupled receptor, 3              | -4.06 | GGGGCACTTGACAATGATCAA  | NM_005226: | NM_005226:                               |
| 9170   | EDG4    | endothelial differentiation, lysophosphatidic acid G-protein-coupled receptor        | 2.96  | CCCGGAGTCTGTCCACTATA   | NM_004720: | NM_004720:                               |
| 9170   | EDG4    | endothelial differentiation, lysophosphatidic acid G-protein-coupled receptor        | 0.95  | GACCATCGGCTTCTTTATATA  | NM_004720: | NM_004720:                               |
| 9294   | EDG5    | endothelial differentiation, sphingolipid G-protein-coupled receptor, 5              | 1.18  | ACCCACGTTTCTGGAGGGCAA  | NM_004230: | NM_004230:                               |
| 9294   | EDG5    | endothelial differentiation, sphingolipid G-protein-coupled receptor, 5              | -0.69 | CACCTGAATCCCTGCTCAA    | NM_004230: | NM_004230:                               |
| 8698   | EDG6    | endothelial differentiation, lysophosphatidic acid G-protein-coupled receptor        | 3.02  | CAGCCGGCTCATTTGTTCTGCA | NM_003775: | NM_003775:                               |
| 8698   | EDG6    | endothelial differentiation, lysophosphatidic acid G-protein-coupled receptor        | 1.35  | CGGAGCTTCCACCACCGACA   | NM_003775: | NM_003775:                               |
| 23566  | EDG7    | endothelial differentiation, sphingolipid G-protein-coupled receptor, 5              | 0.85  | ACCCAGTGATGACTGTCTTA   | NM_012152: | NM_012152:                               |
| 23566  | EDG7    | endothelial differentiation, sphingolipid G-protein-coupled receptor, 5              | -0.21 | ATAGAGGATAGTATTAGCCAA  | NM_012152: | NM_012152:                               |
| 53637  | EDG8    | endothelial differentiation, sphingolipid G-protein-coupled receptor, 8              | -1.18 | CACAATGTGAACAACAGACA   | NM_030760: | NM_030760:                               |
| 53637  | EDG8    | endothelial differentiation, sphingolipid G-protein-coupled receptor, 8              | -0.01 | CAGCCAAATCTATCTGGTAA   | NM_030760: | NM_030760:                               |
| 10085  | EDIL3   | EGF-like repeats and discoidin I-like domains 3                                      | -1.16 | TCCGGGAGACGGGATCATGAA  | NM_005711: | NM_005711:                               |
| 10085  | EDIL3   | EGF-like repeats and discoidin I-like domains 3                                      | -1.07 | TTGGCAATGTACAAGTGAA    | NM_005711: | NM_005711:                               |
| 1906   | EDN1    | endothelin 1                                                                         | 0.12  | ACCGAGCACATGGTGACAGAA  | NM_001955: | NM_001955:                               |
| 1906   | EDN1    | endothelin 1                                                                         | -2.31 | CAGGTGCGAGACCATGAGAAA  | NM_001955: | NM_001955:                               |
| 1907   | EDN2    | endothelin 2                                                                         | 1.64  | CGAACTTGTTTATAATAAA    | NM_001956: | NM_001956:                               |
| 1907   | EDN2    | endothelin 2                                                                         | 2.22  | GAGGACATTTCCACAGTCAA   | NM_001956: | NM_001956:                               |
| 1908   | EDN3    | endothelin 3                                                                         | 0.57  | TTGAGGAAGCCGACTGTAAA   | NM_000114: | NM_207034.NM_000114.NM_207032.NM_207033: |
| 1908   | EDN3    | endothelin 3                                                                         | -0.01 | TAGACACAGATCATAGCTCTA  | NM_000114: | NM_207034.NM_000114.NM_207032.NM_207033: |
| 1909   | EDNRA   | endothelin receptor type A                                                           | 0.47  | CTGGTGAATGTCAAGGGGAA   | NM_001957: | NM_001957:                               |
| 1909   | EDNRA   | endothelin receptor type A                                                           | 0.01  | TAGCTTAACATGATTTTGA    | NM_001957: | NM_001957:                               |
| 1910   | EDNRB   | endothelin receptor type B                                                           | -7.31 | CAGGATATCCACACAACACTT  | NM_000115: | NM_000115:                               |
| 1910   | EDNRB   | endothelin receptor type B                                                           | -0.49 | GAGCTTAACTCGGTCTTAAA   | NM_000115: | NM_000115:                               |
| 8726   | EED     | embryonic ectoderm development                                                       | -2.23 | CTGAACGCCCTGATACACCTA  | NM_003797: | NM_152991.NM_003797:                     |
| 8726   | EED     | embryonic ectoderm development                                                       | 2.26  | AGGCATAATTAGGATAATAAA  | NM_003797: | NM_152991.NM_003797:                     |
| 1917   | EEF1A2  | eukaryotic translation elongation factor 1 alpha 2                                   | -2.98 | CAAGGAGAAAGACCCACATCAA | NM_001958: | NM_001958:                               |
| 1917   | EEF1A2  | eukaryotic translation elongation factor 1 alpha 2                                   | -0.14 | CTGGAAGTTCGAGACCACCAA  | NM_001958: | NM_001958:                               |
| 9521   | EEF1E1  | eukaryotic translation elongation factor 1 epsilon 1                                 | -0.20 | CAAACTCGGGCTTAACTTAAA  | NM_004280: | NM_004280:                               |
| 9521   | EEF1E1  | eukaryotic translation elongation factor 1 epsilon 1                                 | -1.50 | CAAGAACAGACTATATACTAA  | NM_004280: | NM_004280:                               |
| 29904  | EEF2K   | eukaryotic elongation factor-2 kinase                                                | -0.02 | CAGACACTACATGAACACGAA  | NM_013302: | NM_013302:                               |
| 29904  | EEF2K   | eukaryotic elongation factor-2 kinase                                                | 0.01  | CGGGATGGCGCTCTTCTTCTA  | NM_013302: | NM_013302:                               |
| 30008  | EFEMP2  | EGF-containing fibulin-like extracellular matrix protein 2                           | -0.03 | CACGGAATGACAGATGGCTA   | NM_016938: | NM_016938:                               |
| 30008  | EFEMP2  | EGF-containing fibulin-like extracellular matrix protein 2                           | -0.03 | CGCGTCCGCTGCCGTCATCAA  | NM_016938: | NM_016938:                               |
| 1942   | EFNA1   | ephrin-A1                                                                            | 0.23  | CACGTGTATAGTATCTGTATA  | NM_004428: | NM_004428.NM_182685:                     |
| 1942   | EFNA1   | ephrin-A1                                                                            | 0.93  | TACAATGTTCTTTGTCTCAA   | NM_004428: | NM_004428.NM_182685:                     |
| 1943   | EFNA2   | ephrin-A2                                                                            | -4.83 | CACGGTGGAGGTGAGCATCAA  | NM_001405: | NM_001405:                               |
| 1943   | EFNA2   | ephrin-A2                                                                            | -2.41 | CGCGCCCACTCGGACCGCTA   | NM_001405: | NM_001405:                               |
| 1944   | EFNA3   | ephrin-A3                                                                            | 1.42  | CAGGCATGTACAGACTCTATA  | NM_004952: | NM_004952:                               |
| 1944   | EFNA3   | ephrin-A3                                                                            | -3.31 | CGGCAATGCGGCTGACTGGAA  | NM_004952: | NM_004952:                               |
| 1946   | EFNA5   | ephrin-A5                                                                            | -2.89 | AAGTCTGCTCTAAAGCTCAA   | NM_001962: | NM_001962:                               |
| 1946   | EFNA5   | ephrin-A5                                                                            | 1.48  | TTGATGTAAACGCAAAAGTA   | NM_001962: | NM_001962:                               |
| 1947   | EFNB1   | ephrin-B1                                                                            | 2.07  | CTCACGGTAAATTAATGTCTTA | NM_004429: | NM_004429:                               |
| 1947   | EFNB1   | ephrin-B1                                                                            | -4.08 | ACGGACTACAGAGAACAACCTA | NM_004429: | NM_004429:                               |
| 1948   | EFNB2   | ephrin-B2                                                                            | 0.36  | CTGTACTATACCCACAGATA   | NM_004093: | NM_004093:                               |
| 1948   | EFNB2   | ephrin-B2                                                                            | 2.36  | GACGTATTTATAATAGGTATA  | NM_004093: | NM_004093:                               |
| 1949   | EFNB3   | ephrin-B3                                                                            | 0.08  | CTACTGGAATCGGGCAATAAA  | NM_001406: | NM_001406:                               |
| 1949   | EFNB3   | ephrin-B3                                                                            | 0.19  | CACCACGATTACTACATCAAT  | NM_001406: | NM_001406:                               |
| 1950   | EGF     | epidermal growth factor (beta-urogastrone)                                           | -0.88 | CTGGACTGATACAGGATTAA   | NM_001963: | NM_001963:                               |
| 1950   | EGF     | epidermal growth factor (beta-urogastrone)                                           | -2.29 | TGCGAGAAATGGGAATCTTA   | NM_001963: | NM_001963:                               |
| 346007 | EGFL11  | EGF-like-domain, multiple 11                                                         | -1.69 | AAGCTTGAGCAAGACATATA   | NM_198283: | NM_198283:                               |
| 346007 | EGFL11  | EGF-like-domain, multiple 11                                                         | -0.94 | GAGGAATAATGCTACATGTAA  | NM_198283: | NM_198283:                               |
| 1954   | EGFL4   | EGF-like-domain, multiple 4                                                          | -1.05 | TCCGATGTACCTAATTTAAGAA | NM_001410: | NM_001410:                               |
| 1954   | EGFL4   | EGF-like-domain, multiple 4                                                          | -1.61 | CCCGCTGTAAGTGGTGTACCA  | NM_001410: | NM_001410:                               |
| 25975  | EGFL6   | EGF-like-domain, multiple 6                                                          | 0.20  | ATGCTACGTGTGGAACCTCA   | NM_015507: | NM_015507:                               |
| 25975  | EGFL6   | EGF-like-domain, multiple 6                                                          | 0.67  | CTGAATGTACTACTCTTTATA  | NM_015507: | NM_015507:                               |
| 65989  | EGFL9   | EGF-like-domain, multiple 9                                                          | 0.09  | AAGACCTGTGAGCTTGTCTTA  | NM_023932: | NM_023932.NM_206539:                     |
| 65989  | EGFL9   | EGF-like-domain, multiple 9                                                          | 0.92  | AACCTGCCTGACGGCATAAA   | NM_023932: | NM_023932.NM_206539:                     |
| 1956   | EGFR    | epidermal growth factor receptor (erythroblastic leukemia viral (v-erb-b2) oncogene) | -1.10 | CAGGAAGTGGATATCTGAAA   | NM_005228: | NM_005228.NM_201284.NM_201283.NM_201282: |
| 1956   | EGFR    | epidermal growth factor receptor (erythroblastic leukemia viral (v-erb-b2) oncogene) | -6.31 | CCCATCAAATTTATCAAGGAA  | NM_005228: | NM_005228:                               |
| 112398 | EGLN2   | egl nine homolog 2 (C. elegans)                                                      | 0.27  | CTGGCTAGGGTTACCCAGCAA  | NM_017555: | NM_017555:                               |
| 112398 | EGLN2   | egl nine homolog 2 (C. elegans)                                                      | -3.09 | CAGGGAATTTGTGTGCAGAA   | NM_017555: | NM_017555:                               |
| 112399 | EGLN3   | egl nine homolog 3 (C. elegans)                                                      | -0.59 | CTGATAGATTCCGTAATACTA  | NM_022073: | NM_022073:                               |
| 112399 | EGLN3   | egl nine homolog 3 (C. elegans)                                                      | 0.11  | TAGGTCTACTGATATAACAATA | NM_022073: | NM_022073:                               |
| 1958   | EGR1    | early growth response 1                                                              | 1.14  | TTGAAATTTGCTAAAGGGAAA  | NM_001964: | NM_001964:                               |
| 1958   | EGR1    | early growth response 1                                                              | -0.70 | TTGGCTTAAACACACTGTAA   | NM_001964: | NM_001964:                               |
| 1959   | EGR2    | early growth response 2 (Krox-20 homolog, Drosophila)                                | 0.11  | AAGTGTACCTTTGTAGTCAA   | NM_000399: | NM_000399:                               |
| 1959   | EGR2    | early growth response 2 (Krox-20 homolog, Drosophila)                                | 1.04  | TCCACTCTCAACAATCCGTAA  | NM_000399: | NM_000399:                               |
| 10938  | EHD1    | EH-domain containing 1                                                               | -0.09 | CTGGCCTCACTCTCACTTAA   | NM_006795: | NM_006795:                               |
| 10938  | EHD1    | EH-domain containing 1                                                               | -0.02 | ATGGAATTTGTGCACAAGAA   | NM_006795: | NM_006795:                               |
| 79813  | EHMT1   | euchromatic histone-lysine N-methyltransferase 1                                     | -0.10 | AACGAAGAATGGGAACCTATA  | NM_024757: | NM_024757:                               |
| 79813  | EHMT1   | euchromatic histone-lysine N-methyltransferase 1                                     | 0.44  | CAACGGATACATCTTAAATAA  | NM_024757: | NM_024757:                               |
| 10919  | EHMT2   | euchromatic histone-lysine N-methyltransferase 2                                     | 1.20  | CCAGGAATTTAACAGATTGA   | NM_006709: | NM_025256.NM_006709:                     |
| 10919  | EHMT2   | euchromatic histone-lysine N-methyltransferase 2                                     | -1.59 | CACCATGAACATCGGATCGCAA | NM_006709: | NM_025256.NM_006709:                     |
| 9538   | EI24    | etoposide induced 2.4 mRNA                                                           | -1.55 | AACCACGATTTGTTAGTAGAA  | NM_004879: | NM_001007277.NM_004879:                  |
| 9538   | EI24    | etoposide induced 2.4 mRNA                                                           | -0.86 | ATCGTTGGTTCAATAAAGGAA  | NM_004879: | NM_004879:                               |
| 27102  | EIF2AK1 | eukaryotic translation initiation factor 2-alpha kinase 1                            | 0.01  | CCCGAATATGACGAATCTGAT  | NM_014413: | NM_014413:                               |
| 27102  | EIF2AK1 | eukaryotic translation initiation factor 2-alpha kinase 1                            | 0.01  | CTGATTAAGGGTGCACACTAAA | NM_014413: | NM_014413:                               |
| 5610   | EIF2AK2 | eukaryotic translation initiation factor 2-alpha kinase 2                            | 0.22  | ACGGAAAGACTTACGTTATTA  | NM_002759: | NM_002759:                               |
| 5610   | EIF2AK2 | eukaryotic translation initiation factor 2-alpha kinase 2                            | -0.16 | CGGAAAGACTTACGTTATTA   | NM_002759: | NM_002759:                               |
| 9451   | EIF2AK3 | eukaryotic translation initiation factor 2-alpha kinase 3                            | 2.23  | CACAACCTGTATAACGGTTTA  | NM_004836: | NM_004836:                               |
| 9451   | EIF2AK3 | eukaryotic translation initiation factor 2-alpha kinase 3                            | 0.39  | CGGCAGGTCAATTGAAATTAT  | NM_004836: | NM_004836:                               |
| 440275 | EIF2AK4 | eukaryotic translation initiation factor 2 alpha kinase 4                            | 1.03  | TCCGATAATCTTGCAGTGCAA  | BX640919:  | NM_001013703:                            |
| 26523  | EIF2C1  | eukaryotic translation initiation factor 2C, 1                                       | 0.77  | TAGGCTTAACTAAAGCCGAA   | NM_012199: | NM_012199:                               |
| 26523  | EIF2C1  | eukaryotic translation initiation factor 2C, 1                                       | -2.14 | CTCCAAGAATTTGCGAAGTAA  | NM_012199: | NM_012199:                               |
| 27161  | EIF2C2  | eukaryotic translation initiation factor 2C, 2                                       | 0.00  | ATACGGGTCTGTGGTGAATAA  | NM_012154: | NM_012154:                               |
| 27161  | EIF2C2  | eukaryotic translation initiation factor 2C, 2                                       | 0.29  | ACAGATCCATACGTCGGTGAA  | NM_012154: | NM_012154:                               |
| 192669 | EIF2C3  | eukaryotic translation initiation factor 2C, 3                                       | 0.88  | CTGACTGATTTCTCATCGGTA  | NM_024852: | NM_177422.NM_024852:                     |
| 192669 | EIF2C3  | eukaryotic translation initiation factor 2C, 3                                       | -0.68 | CTCCTATAGGAAGTATCGCAA  | NM_024852: | NM_177422.NM_024852:                     |
| 192670 | EIF2C4  | eukaryotic translation initiation factor 2C, 4                                       | 1.39  | TTGACGGGATGAGGGTTGATA  | NM_017629: | NM_017629:                               |

|        |                                                  |                                                                          |       |                        |               |                                                                                                                                                                            |
|--------|--------------------------------------------------|--------------------------------------------------------------------------|-------|------------------------|---------------|----------------------------------------------------------------------------------------------------------------------------------------------------------------------------|
| 192670 | EIF2C4                                           | eukaryotic translation initiation factor 2C, 4                           | -0.30 | AAGCATGTATTAGCTGGAA    | NM_017629:    | NM_017629:                                                                                                                                                                 |
| 8665   | EIF3S5                                           | eukaryotic translation initiation factor 3, subunit 5 epsilon, 47kDa     | -0.31 | TACGGCTACTACGACACTGAA  | NM_003754:    | NM_003754:                                                                                                                                                                 |
| 8663   | EIF3S8                                           | eukaryotic translation initiation factor 3, subunit 8, 110kDa            | -7.80 | CGCCGACGCATGATCAGCAA   | NM_003752:    | NM_003752;NM_01037808:                                                                                                                                                     |
| 8663   | EIF3S8                                           | eukaryotic translation initiation factor 3, subunit 8, 110kDa            | -4.32 | AACGAATGGATGAAGAATTTA  | NM_003752:    | NM_003752;NM_01037808:                                                                                                                                                     |
| 1990   | ELA1                                             | (elastase elastase 1, pancreatic)                                        | -1.84 | CTGCTTACATCTCCGGATAA   | NM_001971:    | NM_001971:                                                                                                                                                                 |
| 1990   | ELA1                                             | (elastase elastase 1, pancreatic)                                        | -0.79 | CAGGACCTCCCGAAACCAAT   | NM_001971:    | NM_001971:                                                                                                                                                                 |
| 63036  | ELA2A                                            | elastase 2A                                                              | -0.65 | CACGGGGTCTCCAATTACAT   | NM_033440:    | NM_033440:                                                                                                                                                                 |
| 63036  | ELA2A                                            | elastase 2A                                                              | 0.53  | CGGCTGCAACTACTACCACAA  | NM_033440:    | NM_033440:                                                                                                                                                                 |
| 51032  | ELA2B                                            | elastase 2B                                                              | 0.13  | CACCGTGAAGACCAATATGAT  | NM_015849:    | NM_015849:                                                                                                                                                                 |
| 51032  | ELA2B                                            | elastase 2B                                                              | -3.99 | TGGCGTGATATGCACCTGCAA  | NM_015849:    | NM_015849:                                                                                                                                                                 |
| 10136  | ELA3A                                            | elastase 3A, pancreatic                                                  | -4.47 | CTGGCTTTGGCTGCAACTTCA  | NM_005747:    | NM_005747:                                                                                                                                                                 |
| 23436  | ELA3B (elastase elastase 3B, pancreatic)         |                                                                          | -0.97 | CTGCCGGTGGTGACTATGAA   | NM_007352:    | NM_007352:                                                                                                                                                                 |
| 60528  | ELAC2                                            | elaC homolog 2 (E. coli)                                                 | 0.84  | TAGTATTTTCAGCTCAATAAA  | NM_018127:    | NM_018127:                                                                                                                                                                 |
| 60528  | ELAC2                                            | elaC homolog 2 (E. coli)                                                 | -4.70 | AAAGAAGTCAGTACCAGAAA   | NM_018127:    | NM_018127:                                                                                                                                                                 |
| 1996   | ELAVL4                                           | ELAV (embryonic lethal, abnormal vision, Drosophila)-like 4 (Hu antigen) | 1.43  | CCAGTGTTCCTAAGTATTAA   | NM_021952:    | NM_021952:                                                                                                                                                                 |
| 1996   | ELAVL4                                           | ELAV (embryonic lethal, abnormal vision, Drosophila)-like 4 (Hu antigen) | -2.64 | AAAGGTGATTCGTGACTTCAA  | NM_021952:    | NM_021952:                                                                                                                                                                 |
| 1998   | ELF2                                             | E74-like factor 2 (ets domain transcription factor)                      | -0.13 | TACGATATCAAGTTCACACTAA | NM_006874:    | NM_006874;NM_201999:                                                                                                                                                       |
| 1998   | ELF2                                             | E74-like factor 2 (ets domain transcription factor)                      | 0.03  | AACAACGAACCCATCAATAA   | NM_006874:    | NM_006874;NM_201999:                                                                                                                                                       |
| 2002   | ELK1 (ELK1, ELK1, member of ETS oncogene family) |                                                                          | 0.70  | AGGGAGTCACTCTTCCCTATA  | NM_005229:    | NM_005229:                                                                                                                                                                 |
| 2002   | ELK1 (ELK1, ELK1, member of ETS oncogene family) |                                                                          | -1.14 | CCCACGTGAGCTGTAGGGAAA  | NM_005229:    | NM_005229:                                                                                                                                                                 |
| 2005   | ELK4                                             | ELK4, ETS-domain protein (SRF accessory protein 1)                       | 0.38  | AAGGACAAGTAAATAATTCA   | NM_001973:    | NM_001973;NM_021795:                                                                                                                                                       |
| 2005   | ELK4                                             | ELK4, ETS-domain protein (SRF accessory protein 1)                       | 0.68  | CTGGCTTATATTCTTCAATTA  | NM_001973:    | NM_001973;NM_021795:                                                                                                                                                       |
| 2006   | ELN                                              | elastin (supravalvular aortic stenosis, Williams-Beuren syndrome)        | -1.77 | AAGCTTGGCCGGGAAAGAGAA  | NM_000501:    | NM_000501:                                                                                                                                                                 |
| 2006   | ELN                                              | elastin (supravalvular aortic stenosis, Williams-Beuren syndrome)        | 0.46  | CAGGTGCAGATGAGGGAGTTA  | NM_000501:    | NM_000501:                                                                                                                                                                 |
| 64123  | ELTD1                                            | EGF, latrophilin and seven transmembrane domain containing 1             | 0.67  | ATGCTTAATCATTCTGTTAA   | BC025721.1:   | XM_371262:                                                                                                                                                                 |
| 64123  | ELTD1                                            | EGF, latrophilin and seven transmembrane domain containing 1             | -0.45 | CCCACATTATATGAACTTGAA  | BC025721.1:   | XM_371262:                                                                                                                                                                 |
| 2010   | EMD                                              | emerin (Emery-Dreifuss muscular dystrophy)                               | 0.72  | CAGGTGCATGATGACGATCTT  | NM_000117:    | NM_000117:                                                                                                                                                                 |
| 2010   | EMD                                              | emerin (Emery-Dreifuss muscular dystrophy)                               | -0.08 | TACAATGACGACTGATGAA    | NM_000117:    | NM_000117:                                                                                                                                                                 |
| 27436  | EML4                                             | echinoderm microtubule associated protein like 4                         | -2.21 | TGGATTGTAAGGACATTGAT   | NM_019063:    | NM_019063:                                                                                                                                                                 |
| 27436  | EML4                                             | echinoderm microtubule associated protein like 4                         | 0.50  | CAGGAATCGATCGGATTGTA   | NM_019063:    | NM_019063:                                                                                                                                                                 |
| 2015   | EMR1                                             | egl-like module containing, mucin-like, hormone receptor-like 1          | 0.00  | CACGTGGACAAATTCACCAA   | NM_001974:    | NM_001974:                                                                                                                                                                 |
| 2015   | EMR1                                             | egl-like module containing, mucin-like, hormone receptor-like 1          | -1.02 | TTGCACAGTTATAGTATGCAA  | NM_001974:    | NM_001974:                                                                                                                                                                 |
| 30817  | EMR2                                             | egl-like module containing, mucin-like, hormone receptor-like 2          | 0.50  | AAGCATGGTGATGATATAGGA  | NM_013447:    | NM_152916;NM_152921;NM_152918;NM_152919;NM_152920;NM_152918;NM_152916;NM_152921;NM_013447;NM_152917;NM_152919;NM_152920;NM_152918;NM_152916;NM_152921;NM_013447;NM_152917: |
| 30817  | EMR2                                             | egl-like module containing, mucin-like, hormone receptor-like 2          | -0.64 | ACGGGTTGATTATTTAGTCA   | NM_013447:    | NM_152919;NM_152920;NM_152918;NM_152916;NM_152921;NM_013447;NM_152917:                                                                                                     |
| 84658  | EMR3                                             | egl-like module containing, mucin-like, hormone receptor-like 3          | 0.45  | AACGATGATGGTACTATTGAA  | NM_032571:    | NM_032571;NM_152939:                                                                                                                                                       |
| 84658  | EMR3                                             | egl-like module containing, mucin-like, hormone receptor-like 3          | 0.93  | GTGGTTTAGAGAGATCGTAAA  | NM_032571:    | NM_032571;NM_152939:                                                                                                                                                       |
| 326342 | EMR4                                             | egl-like module containing, mucin-like, hormone receptor-like 4          | 0.84  | CGGATTTGACGAGAACAATA   | AY181245.1:   | XM_377506:                                                                                                                                                                 |
| 326342 | EMR4                                             | egl-like module containing, mucin-like, hormone receptor-like 4          | 0.78  | CGGATTTGACGAGAACAATA   | AY181245.1:   | XM_377506:                                                                                                                                                                 |
| 2016   | EMX1                                             | (empty empty spiracles homolog 1 (Drosophila))                           | -3.48 | CCGGCCACCGGCTCAACTA    | NM_004097:    | NM_004097:                                                                                                                                                                 |
| 2016   | EMX1                                             | (empty empty spiracles homolog 1 (Drosophila))                           | 0.41  | TCCAGCCACACTGTAGTTTA   | NM_004097:    | NM_004097:                                                                                                                                                                 |
| 2018   | EMX2                                             | (empty empty spiracles homolog 2 (Drosophila))                           | -0.02 | CCGGTGGAGAATGCCACCAA   | NM_004098:    | NM_004098:                                                                                                                                                                 |
| 2018   | EMX2                                             | (empty empty spiracles homolog 2 (Drosophila))                           | -1.96 | AAGGCTCAGATTCGCAACAAA  | NM_004098:    | NM_004098:                                                                                                                                                                 |
| 2019   | EN1                                              | (engrailed engrailed homolog 1)                                          | 0.01  | CCCGGATTTATTCGCCAAA    | NM_001426:    | NM_001426:                                                                                                                                                                 |
| 2019   | EN1                                              | (engrailed engrailed homolog 1)                                          | 0.70  | CTGGGTGACTGCACACGTTA   | NM_001426:    | NM_001426:                                                                                                                                                                 |
| 2020   | EN2                                              | engrailed homolog 2                                                      | 0.43  | CCCACGGTAAACAATATGGAA  | NM_001427:    | NM_001427:                                                                                                                                                                 |
| 2020   | EN2                                              | engrailed homolog 2                                                      | 0.12  | TACGTTGTACATAAATAGTGA  | NM_001427:    | NM_001427:                                                                                                                                                                 |
| 8507   | ENC1                                             | ectodermal-neural cortex (with BTB-like domain)                          | -0.92 | ACGGCATGTATCACAGATGTA  | NM_003633:    | NM_003633:                                                                                                                                                                 |
| 8507   | ENC1                                             | ectodermal-neural cortex (with BTB-like domain)                          | -0.90 | CAGCGGCTCCATTAACACTCA  | NM_003633:    | NM_003633:                                                                                                                                                                 |
| 23052  | ENDOD1                                           | endonuclease domain containing 1                                         | 0.97  | AACGAATGGTACAATCTCAA   | XM_290546:    | XM_290546:                                                                                                                                                                 |
| 23052  | ENDOD1                                           | endonuclease domain containing 1                                         | 0.03  | CCGCCAGGATCAATCAGAAA   | XM_290546:    | XM_290546:                                                                                                                                                                 |
| 2021   | ENDOG                                            | endonuclease G                                                           | -8.19 | CCCGGGCGAGCTGGCCAAAGTA | NM_004435:    | NM_004435:                                                                                                                                                                 |
| 2021   | ENDOG                                            | endonuclease G                                                           | -4.61 | CTGGAACAACCTGGAGAATA   | NM_004435:    | NM_004435:                                                                                                                                                                 |
| 9941   | ENDOGL1                                          | endonuclease G-like 1                                                    | 1.71  | AACAGTGGAACTCAAAATTTA  | NM_005107:    | NM_005107:                                                                                                                                                                 |
| 9941   | ENDOGL1                                          | endonuclease G-like 1                                                    | 1.60  | AAGAAGCTAGAAGAACTCAA   | NM_005107:    | NM_005107:                                                                                                                                                                 |
| 2022   | ENG                                              | engoglin (Osler-Rendu-Weber syndrome 1)                                  | 0.50  | CAGCAATGAGCGGGTGGTCAA  | NM_000118:    | NM_000118:                                                                                                                                                                 |
| 2022   | ENG                                              | engoglin (Osler-Rendu-Weber syndrome 1)                                  | -0.21 | CGCCATGACCCTGGTACTAAA  | NM_000118:    | NM_000118:                                                                                                                                                                 |
| 2023   | ENO1                                             | enolase 1, (alpha)                                                       | 0.59  | CAGAGGTTTACCAACCTGA    | NM_001428:    | NM_001428:                                                                                                                                                                 |
| 2023   | ENO1                                             | enolase 1, (alpha)                                                       | -0.75 | GCGCATTTGGAGCAGAGTTTA  | NM_001428:    | NM_001428:                                                                                                                                                                 |
| 2028   | ENPEP                                            | glutamyl aminopeptidase (aminopeptidase A)                               | 0.75  | AAGGACACGAACTTTATAAA   | NM_001977:    | NM_001977:                                                                                                                                                                 |
| 2028   | ENPEP                                            | glutamyl aminopeptidase (aminopeptidase A)                               | -1.21 | CAGAGAGTAAATTCAGCTGA   | NM_001977:    | NM_001977:                                                                                                                                                                 |
| 5167   | ENPP1                                            | ectonucleotide pyrophosphatase/phosphodiesterase 1                       | -0.02 | CACCGGCTCCTAATAACGGAA  | NM_006208:    | NM_006208:                                                                                                                                                                 |
| 5167   | ENPP1                                            | ectonucleotide pyrophosphatase/phosphodiesterase 1                       | 1.05  | CAGATAAACTACTTTCATTTA  | NM_006208:    | NM_006208:                                                                                                                                                                 |
| 5168   | ENPP2                                            | ectonucleotide pyrophosphatase/phosphodiesterase 2 (autotaxin)           | 2.04  | ATGGATCATTATGCTCGGGAA  | NM_006209:    | NM_006209:                                                                                                                                                                 |
| 5168   | ENPP2                                            | ectonucleotide pyrophosphatase/phosphodiesterase 2 (autotaxin)           | 1.17  | CGGACTAGATGATATCTTTA   | NM_006209:    | NM_006209:                                                                                                                                                                 |
| 5169   | ENPP3                                            | ectonucleotide pyrophosphatase/phosphodiesterase 3                       | 0.70  | AACCTAATGTGTGATCTTCTA  | NM_005021:    | NM_005021:                                                                                                                                                                 |
| 5169   | ENPP3                                            | ectonucleotide pyrophosphatase/phosphodiesterase 3                       | 1.07  | CTGGCTTTAGGAGTAAATCA   | NM_005021:    | NM_005021:                                                                                                                                                                 |
| 2029   | ENSA                                             | endosulfine alpha                                                        | -0.14 | TAGTTGAGAAGTCAACATTA   | NM_004436:    | NM_004436;NM_207042;NM_207045;NM_207046:                                                                                                                                   |
| 2029   | ENSA                                             | endosulfine alpha                                                        | 1.22  | TCAGTATTCGAAATAACAAA   | NM_004436:    | NM_004436;NM_207042;NM_207045;NM_207046:                                                                                                                                   |
| 2033   | EP300                                            | E1A binding protein p300                                                 | -2.23 | TTGACTACCCTTCAAGTAA    | NM_001429:    | NM_001429:                                                                                                                                                                 |
| 2033   | EP300                                            | E1A binding protein p300                                                 | -4.55 | CACCGATAACTCAGACTTGA   | NM_001429:    | NM_001429:                                                                                                                                                                 |
| 2034   | EPAS1                                            | endothelial PAS domain protein 1                                         | 0.30  | AACTAGGTATTTCTAACGCCA  | NM_001430:    | NM_001430:                                                                                                                                                                 |
| 2034   | EPAS1                                            | endothelial PAS domain protein 1                                         | -1.82 | CTGGCGCTGGAACCTCTCAA   | NM_001430:    | NM_001430:                                                                                                                                                                 |
| 2035   | EPB41                                            | erythrocyte membrane protein band 4.1 (elliptocytosis 1, RH-linked)      | 0.46  | TAGGATATCAGAATTTGTCAA  | NM_004437:    | NM_004437;NM_203343;NM_203342:                                                                                                                                             |
| 2035   | EPB41                                            | erythrocyte membrane protein band 4.1 (elliptocytosis 1, RH-linked)      | -4.25 | CACGGCCAGTGAATGGGATA   | NM_004437:    | NM_004437;NM_203343;NM_203342:                                                                                                                                             |
| 2036   | EPB41L1                                          | erythrocyte membrane protein band 4.1-like 1                             | -0.18 | CACGTTACAGTTAGCAGACGA  | NM_012156:    | NM_012156;NM_177996:                                                                                                                                                       |
| 2036   | EPB41L1                                          | erythrocyte membrane protein band 4.1-like 1                             | 0.56  | ACGATGTGCTTTGAAGTTAT   | NM_012156:    | NM_012156;NM_177996:                                                                                                                                                       |
| 2038   | EPB42                                            | erythrocyte membrane protein band 4.2                                    | -0.86 | AACCTTGTCTCAAACTCAA    | NM_000119:    | NM_000119:                                                                                                                                                                 |
| 2038   | EPB42                                            | erythrocyte membrane protein band 4.2                                    | -0.21 | CAGCTTAACTTCCAGCTCTA   | NM_000119:    | NM_000119:                                                                                                                                                                 |
| 2041   | EPHA1                                            | EPH receptor A1                                                          | -3.19 | CACCTTAACTTGGGAAGCCCA  | NM_005232:    | NM_005232:                                                                                                                                                                 |
| 2041   | EPHA1                                            | EPH receptor A1                                                          | 0.06  | CAGATGGGATCCCGTATCGAA  | NM_005232:    | NM_005232:                                                                                                                                                                 |
| 284656 | EPHA10                                           | EPH receptor A10                                                         | 0.25  | CACGGAGTACGAGATCCGATA  | NM_001004338: | NM_001004338:                                                                                                                                                              |
| 284656 | EPHA10                                           | EPH receptor A10                                                         | -2.15 | AACATGTACGCTTCAATAAA   | NM_001004338: | NM_001004338:                                                                                                                                                              |
| 1969   | EPHA2                                            | EPH receptor A2                                                          | -4.91 | CAGCGCCAAAGTAAACAGGTA  | NM_004431:    | NM_004431:                                                                                                                                                                 |
| 1969   | EPHA2                                            | EPH receptor A2                                                          | -1.21 | TGGACAGACATATAGGATAT   | NM_004431:    | NM_004431:                                                                                                                                                                 |
| 2042   | EPHA3                                            | EPH receptor A3                                                          | 1.81  | CCGGAAAGATGTTACTTCAA   | NM_005233:    | NM_182644;NM_005233:                                                                                                                                                       |
| 2042   | EPHA3                                            | EPH receptor A3                                                          | -3.30 | TACCTTCAACATCATATGTA   | NM_005233:    | NM_182644;NM_005233:                                                                                                                                                       |
| 2043   | EPHA4                                            | EPH receptor A4                                                          | -1.17 | CCCGGAGTGAAGTTACCTTA   | NM_004438:    | NM_004438:                                                                                                                                                                 |
| 2043   | EPHA4                                            | EPH receptor A4                                                          | -0.01 | CCGCCAGACATTTCTTATA    | NM_004438:    | NM_004438:                                                                                                                                                                 |
| 2044   | EPHA5                                            | EPH receptor A5                                                          | -0.05 | ACCAGTTGGATCTCCAATGAA  | NM_004439:    | NM_004439;NM_182472:                                                                                                                                                       |
| 2044   | EPHA5                                            | EPH receptor A5                                                          | -2.85 | CCCGCCAGATGTGTCTGTAA   | NM_004439:    | NM_004439;NM_182472:                                                                                                                                                       |
| 285220 | EPHA6                                            | EPH receptor A6                                                          | -1.93 | CAGGTATGTAATGTAATGAA   | XM_114973:    | XM_114973:                                                                                                                                                                 |
| 285220 | EPHA6                                            | EPH receptor A6                                                          | 0.03  | AAGGTTATTTCCGAGCTGAA   | XM_114973:    | XM_114973:                                                                                                                                                                 |
| 2045   | EPHA7                                            | EPH receptor A7                                                          | -1.47 | ACAGTCATGATGATGATGAA   | NM_004440:    | NM_004440:                                                                                                                                                                 |
| 2045   | EPHA7                                            | EPH receptor A7                                                          | 1.60  | CAGGCTGCCAAGGAAGTACTA  | NM_004440:    | NM_004440:                                                                                                                                                                 |
| 2046   | EPHA8                                            | EPH receptor A8                                                          | -0.54 | ACGGCCACCAGGGATGTGAA   | NM_020526:    | NM_020526:                                                                                                                                                                 |

|        |         |                                                                          |       |                         |               |                                      |
|--------|---------|--------------------------------------------------------------------------|-------|-------------------------|---------------|--------------------------------------|
| 2046   | EPHA8   | EPH receptor A8                                                          | 1.27  | GAGCGTGTGCTTATCCGTTAA   | NM_020526:    | NM_020526:                           |
| 2047   | EPHB1   | EPH receptor B1                                                          | -0.61 | ATGGCCCTGGATTATCTACTA   | NM_004441:    | NM_004441:                           |
| 2047   | EPHB1   | EPH receptor B1                                                          | -6.85 | GCGGGATGATGTGACCTACAA   | NM_004441:    | NM_004441:                           |
| 2048   | EPHB2   | EPH receptor B2                                                          | 1.24  | CACCGTTTCTAGAGGACGATA   | NM_017449:    | NM_017449:NM_004442:                 |
| 2048   | EPHB2   | EPH receptor B2                                                          | -0.56 | CCGAGGAGACCTCGTCTACAA   | NM_017449:    | NM_017449:NM_004442:                 |
| 2049   | EPHB3   | EPH receptor B3                                                          | -1.57 | CCGACGCTGACCCGCAATTA    | NM_004443:    | NM_004443:                           |
| 2049   | EPHB3   | EPH receptor B3                                                          | -4.31 | GCGGGTCTACGTGGAGCTCAA   | NM_004443:    | NM_004443:                           |
| 2050   | EPHB4   | EPH receptor B4                                                          | -2.11 | CCGAGCCAAATAGCCACTCTAA  | NM_004444:    | NM_004444:                           |
| 2050   | EPHB4   | EPH receptor B4                                                          | 0.10  | TGGGACAAACACGGACAGTAT   | NM_004444:    | NM_004444:                           |
| 2051   | EPHB6   | EPH receptor B6                                                          | -0.37 | AACCGCAAATCTCTAGATCAA   | NM_004445:    | NM_004445:                           |
| 2051   | EPHB6   | EPH receptor B6                                                          | -7.08 | CTGGAGCTTTGGGATACTCAT   | NM_004445:    | NM_004445:                           |
| 2052   | EPHX1   | epoxide hydrolase 1, microsomal (xenobiotic)                             | 0.38  | CAACATGGCTTTGATGATAAA   | NM_000120:    | NM_000120:                           |
| 2052   | EPHX1   | epoxide hydrolase 1, microsomal (xenobiotic)                             | 0.80  | TTCCAGGAATTCTACATTCAA   | NM_000120:    | NM_000120:                           |
| 2054   | EPIM    | epimorphin                                                               | 0.87  | CAGCTAGTTTGTGCTAATTA    | NM_001980:    | NM_001980:NM_194356:                 |
| 2054   | EPIM    | epimorphin                                                               | 1.05  | TAGGATTCATGATAATTA      | NM_001980:    | NM_001980:NM_194356:                 |
| 7957   | EPM2A   | epilepsy, progressive myoclonus type 2A, Lafora disease (laforin)        | -1.38 | AAGCTGGAGTTAATAATCTAT   | NM_005670:    | NM_005670:                           |
| 7957   | EPM2A   | epilepsy, progressive myoclonus type 2A, Lafora disease (laforin)        | -0.51 | CAAGGTCTCATGACCAGTCAA   | NM_005670:    | NM_005670:                           |
| 2056   | EPO     | erythropoietin                                                           | -1.33 | CAGCCGAGTCTGGAGAGGTA    | NM_000799:    | NM_000799:                           |
| 2056   | EPO     | erythropoietin                                                           | -0.95 | CAGGATGACCTGGAGAAGCTTA  | NM_000799:    | NM_000799:                           |
| 2057   | EPOR    | erythropoietin receptor                                                  | 0.10  | CCAGTGCAGACTCAAGACTTA   | NM_000121:    | NM_000121:                           |
| 2057   | EPOR    | erythropoietin receptor                                                  | 1.04  | CAGATGATCAGGGATCCAATA   | NM_000121:    | NM_000121:                           |
| 2058   | EPRS    | glutamyl-prolyl-HRNA synthetase                                          | 0.81  | AAGCGATTACTGAGTGTAA     | NM_004446:    | NM_004446:                           |
| 2058   | EPRS    | glutamyl-prolyl-HRNA synthetase                                          | -4.15 | CAGGAGGAGACTATACAATA    | NM_004446:    | NM_004446:                           |
| 2060   | EPS15   | epidermal growth factor receptor pathway substrate 15                    | -1.03 | CAGGAAATTTGCAATGCAA     | NM_001981:    | NM_001981:                           |
| 2060   | EPS15   | epidermal growth factor receptor pathway substrate 15                    | 0.13  | CACCTGGTATAGAAATAATA    | NM_001981:    | NM_001981:                           |
| 58513  | EPS15L1 | epidermal growth factor receptor pathway substrate 15-like 1             | 0.69  | CAGAACCTTCTAGCACACATA   | NM_021235:    | NM_021235:                           |
| 58513  | EPS15L1 | epidermal growth factor receptor pathway substrate 15-like 1             | -0.20 | AACCATCATCAAGTCCCGTAA   | NM_021235:    | NM_021235:                           |
| 2059   | EPS8    | epidermal growth factor receptor pathway substrate 8                     | 0.26  | TGCGTTCTAAAGGATGATATT   | NM_004447:    | NM_004447:                           |
| 2059   | EPS8    | epidermal growth factor receptor pathway substrate 8                     | -3.21 | TTGATATTGTGAGACCTCCA    | NM_004447:    | NM_004447:                           |
| 54869  | EPS8L1  | EPS8-like 1                                                              | -0.84 | CAGGGTCAAGATAGAACATGA   | NM_017729:    | NM_017729:                           |
| 54869  | EPS8L1  | EPS8-like 1                                                              | -0.03 | CAGCAGTGAAGCTGCGTCAA    | NM_017729:    | NM_133180:NM_139204:NM_017729:       |
| 64787  | EPS8L2  | EPS8-like 2                                                              | 0.04  | CACCCAGGCTAAGCAATTA     | NM_022772:    | NM_022772:                           |
| 64787  | EPS8L2  | EPS8-like 2                                                              | 0.06  | CCCAATGTCATGGAGTATTA    | NM_022772:    | NM_022772:                           |
| 79574  | EPS8L3  | EPS8-like 3                                                              | -9.53 | CCGGAAGGACTCTCCAGAA     | NM_024526:    | NM_133181:NM_139053:NM_024526:       |
| 79574  | EPS8L3  | EPS8-like 3                                                              | 0.75  | AGCCATTTACTTGGACCCGAA   | NM_024526:    | NM_133181:NM_139053:NM_024526:       |
| 8288   | EPX     | eosinophil peroxidase                                                    | 1.36  | CTCGAATATATGTGACAATA    | NM_000502:    | NM_000502:                           |
| 8288   | EPX     | eosinophil peroxidase                                                    | 2.94  | AAGGAAGTTCCTGAATTGTA    | NM_000502:    | NM_000502:                           |
| 3266   | ERAS    | ES cell expressed Ras                                                    | -2.03 | CACATCAGGTACTAGGGAA     | NM_181532:    | NM_181532:                           |
| 3266   | ERAS    | ES cell expressed Ras                                                    | -1.29 | CTGAAGGCTCTGGCCAAAGAA   | NM_181532:    | NM_181532:                           |
| 2064   | ERBB2   | v-erb-b2 erythroblastic leukemia viral oncogene homolog 2, neuro/glio    | -1.99 | AACAAGAAATCTTAGACGAA    | NM_004448:    | NM_004448:NM_001005862:              |
| 2064   | ERBB2   | v-erb-b2 erythroblastic leukemia viral oncogene homolog 2, neuro/glio    | -0.42 | CAGTBTGGAGTCCATGCGCAA   | NM_004448:    | NM_004448:NM_001005862:              |
| 55914  | ERBB2IP | erbB2 interacting protein                                                | 0.46  | CCCGAAGGCCAAATAATA      | NM_001006600: | NM_001006600:NM_018695:              |
| 55914  | ERBB2IP | erbB2 interacting protein                                                | 1.03  | CAAGATGTTATCAATTGGTTA   | NM_001006600: | NM_001006600:NM_018695:              |
| 2065   | ERBB3   | v-erb-b2 erythroblastic leukemia viral oncogene homolog 3 (avian)        | 1.28  | ACCGCGATGCTGAGAACC      | NM_001982:    | NM_001005915:NM_001982:              |
| 2065   | ERBB3   | v-erb-b2 erythroblastic leukemia viral oncogene homolog 3 (avian)        | -1.25 | CCAGAGCTTCAAGACTGTTTA   | NM_001982:    | NM_001982:                           |
| 2066   | ERBB4   | v-erb-a erythroblastic leukemia viral oncogene homolog 4 (avian)         | -0.06 | CTACGTGTTAGTGGCTTTAA    | NM_005235:    | NM_005235:                           |
| 2066   | ERBB4   | v-erb-a erythroblastic leukemia viral oncogene homolog 4 (avian)         | -0.10 | CTGGAGAATTTACGCTAATTT   | NM_005235:    | NM_005235:                           |
| 2067   | ERCC1   | excision repair cross-complementing rodent repair deficiency, complex    | 1.83  | ACCGTGAAGTCAAGTCAACAAA  | NM_001983:    | NM_001983:NM_202001:                 |
| 2067   | ERCC1   | excision repair cross-complementing rodent repair deficiency, complex    | -0.80 | CACCGTGAAGTCAAGTCAACAAA | NM_001983:    | NM_001983:NM_202001:                 |
| 2068   | ERCC2   | excision repair cross-complementing rodent repair deficiency, complex    | -2.09 | CCCGTCAACCCCTCTGCTAA    | NM_000400:    | NM_000400:                           |
| 2068   | ERCC2   | excision repair cross-complementing rodent repair deficiency, complex    | 0.98  | CCGATTTCTAGGGAATTTGA    | NM_000400:    | NM_000400:                           |
| 2071   | ERCC3   | excision repair cross-complementing rodent repair deficiency, complex    | 0.97  | ACCGTCTGAATAACAGAA      | NM_000122:    | NM_000122:                           |
| 2071   | ERCC3   | excision repair cross-complementing rodent repair deficiency, complex    | -0.48 | CCGGAAATATGTTGCAATCAA   | NM_000122:    | NM_000122:                           |
| 2072   | ERCC4   | excision repair cross-complementing rodent repair deficiency, complex    | 0.01  | CAGCACCTCGATGTTTATA     | NM_005236:    | NM_005236:                           |
| 2072   | ERCC4   | excision repair cross-complementing rodent repair deficiency, complex    | 0.30  | CTCGCCGTGAACAAATGAAA    | NM_005236:    | NM_005236:                           |
| 2073   | ERCC5   | excision repair cross-complementing rodent repair deficiency, complex    | 0.27  | AAGAAGTCTAAACGCTATTA    | NM_000123:    | NM_000123:                           |
| 2073   | ERCC5   | excision repair cross-complementing rodent repair deficiency, complex    | -0.10 | CCCGACTCTTACGCCATTA     | NM_000123:    | NM_000123:                           |
| 2074   | ERCC6   | excision repair cross-complementing rodent repair deficiency, complex    | -0.01 | ACGGGCTTCTGCTAATTA      | L04791:       | NM_000124:                           |
| 2074   | ERCC6   | excision repair cross-complementing rodent repair deficiency, complex    | 0.58  | ATGGATGGTACCACTACAATA   | L04791:       | NM_000124:                           |
| 1161   | ERCC8   | excision repair cross-complementing rodent repair deficiency, complex    | -0.19 | ATGGTCTATCTCGACAGCTA    | NM_000082:    | NM_001007233:NM_000082:              |
| 1161   | ERCC8   | excision repair cross-complementing rodent repair deficiency, complex    | 0.90  | CAGAGTCAACACGGAGAGTTT   | NM_000082:    | NM_001007233:NM_000082:NM_001007234: |
| 2078   | ERG     | v-ets erythroblastosis virus E26 oncogene like (avian)                   | 0.68  | ATGCAGAAATGATGTAATA     | NM_004449:    | NM_182918:NM_004449:                 |
| 2078   | ERG     | v-ets erythroblastosis virus E26 oncogene like (avian)                   | 0.10  | CTGGAATTTGCTGATTTTAA    | NM_004449:    | NM_182918:NM_004449:                 |
| 114625 | ERMAP   | erythroblast membrane-associated protein (Scianna blood group)           | 0.33  | TTGAGAGATTTGATTTCAA     | NM_018538:    | NM_001017922:NM_018538:              |
| 114625 | ERMAP   | erythroblast membrane-associated protein (Scianna blood group)           | -1.69 | TTGGAAAGGCTGATGAGTAA    | NM_018538:    | NM_001017922:NM_018538:              |
| 2081   | ERN1    | endoplasmic reticulum to nucleus signalling 1                            | 0.04  | CAGCAGGACGCTCAAGTTGA    | NM_001433:    | NM_001433:                           |
| 2081   | ERN1    | endoplasmic reticulum to nucleus signalling 1                            | 0.58  | CAGGACGCTGAGCCAGAAATA   | NM_001433:    | NM_001433:                           |
| 10595  | ERN2    | endoplasmic reticulum to nucleus signalling 2                            | -0.72 | AAGGATGAACTGGCTTCTAT    | NM_033266:    | NM_033266:                           |
| 10595  | ERN2    | endoplasmic reticulum to nucleus signalling 2                            | -0.39 | CACCTGCATCTTTACACATA    | NM_033266:    | NM_033266:                           |
| 90952  | ESAM    | endothelial cell adhesion molecule                                       | 0.81  | ATACATAATGTTGTATGAAA    | NM_138961:    | NM_138961:                           |
| 90952  | ESAM    | endothelial cell adhesion molecule                                       | -0.04 | TCAGGTGTTGCTACATCAA     | NM_138961:    | NM_138961:                           |
| 11082  | ESM1    | endothelial cell-specific molecule 1                                     | -2.95 | CCCGGTTACTGCTATCTGAA    | NM_007036:    | NM_007036:                           |
| 11082  | ESM1    | endothelial cell-specific molecule 1                                     | 0.38  | CCCGTAAATGAGGAAATGGTTA  | NM_007036:    | NM_007036:                           |
| 9700   | ESPL1   | extra spindle poles like 1 (S. cerevisiae)                               | 0.57  | CAAGTCTCCCTGAATCATA     | NM_012291:    | NM_012291:                           |
| 9700   | ESPL1   | extra spindle poles like 1 (S. cerevisiae)                               | 0.28  | CAGCAGCTGACTGCTAAGCTA   | NM_012291:    | NM_012291:                           |
| 2099   | ESR1    | estrogen receptor 1                                                      | 1.56  | GAGACTTGAATTAATAAGTGA   | NM_000125:    | NM_000125:                           |
| 2099   | ESR1    | estrogen receptor 1                                                      | -0.39 | TTCTTTGACCTATAGGCTAA    | NM_000125:    | NM_000125:                           |
| 2100   | ESR2    | estrogen receptor 2 (ER beta)                                            | -0.13 | CAGCGATTACGCATCGGATA    | NM_001437:    | NM_001437:                           |
| 2100   | ESR2    | estrogen receptor 2 (ER beta)                                            | -3.02 | CTGGTCTGTGGAAGGATGTA    | NM_001437:    | NM_001437:                           |
| 2101   | ESRRA   | estrogen-related receptor alpha                                          | -0.01 | CCGAGAGATTGTGCTACCAT    | NM_004451:    | NM_004451:                           |
| 2101   | ESRRA   | estrogen-related receptor alpha                                          | 1.10  | AGAGGAGATGTTCTACTAAA    | NM_004451:    | NM_004451:                           |
| 2103   | ESRRB   | estrogen-related receptor beta                                           | -0.13 | CAGCACTTCTATAGCGTCAA    | NM_004452:    | NM_004452:                           |
| 2103   | ESRRB   | estrogen-related receptor beta                                           | -2.17 | ACGCAAGTACAAAGGACTCAA   | NM_004452:    | NM_004452:                           |
| 2104   | ESRRG   | estrogen-related receptor gamma                                          | 0.70  | TGCATTTAGCCAGTAGTAAA    | NM_001438:    | NM_206595:NM_001438:NM_206594:       |
| 2104   | ESRRG   | estrogen-related receptor gamma                                          | 0.88  | TTCAACTACACTATATATA     | NM_001438:    | NM_206595:NM_001438:NM_206594:       |
| 345062 | ESSPL   | epidermis-specific serine protease-like protein                          | -0.11 | AAGAGAAATGATGGAGTTTA    | NM_183375:    | NM_183375:                           |
| 345062 | ESSPL   | epidermis-specific serine protease-like protein                          | -0.01 | CCAATGTAATCTACTACCAA    | NM_183375:    | NM_183375:                           |
| 2108   | ETFA    | electron-transfer-flavoprotein, alpha polypeptide (glutaric aciduria II) | 0.13  | CAGATATTTGGGTTATTA      | NM_000126:    | NM_000126:                           |
| 2108   | ETFA    | electron-transfer-flavoprotein, alpha polypeptide (glutaric aciduria II) | 0.76  | CAAGACAATTTGGGCAATTA    | NM_000126:    | NM_000126:                           |
| 2109   | ETFB    | electron-transfer-flavoprotein, beta polypeptide                         | -0.20 | GCCCAACATCATGAAAGCCAA   | NM_001985:    | NM_001014763:NM_001985:              |
| 2109   | ETFB    | electron-transfer-flavoprotein, beta polypeptide                         | -0.53 | CACCGTCCCAACATCATGAA    | NM_001985:    | NM_001014763:NM_001985:              |
| 55500  | ETNK1   | ethanolamine kinase 1                                                    | -0.01 | CCGTATGGTGGGATAGAAA     | NM_018638:    | NM_018638:                           |
| 55500  | ETNK1   | ethanolamine kinase 1                                                    | -0.43 | TCCGTATGGTGGGATTAGAA    | NM_018638:    | NM_018638:                           |
| 55224  | ETNK2   | ethanolamine kinase 2                                                    | 0.89  | TCCGATTCAACCACTACTCA    | NM_018208:    | NM_018208:                           |
| 55224  | ETNK2   | ethanolamine kinase 2                                                    | 1.60  | TACGTGCAAGTCAACAAGTTT   | NM_018208:    | NM_018208:                           |
| 2113   | ETS1    | v-ets erythroblastosis virus E26 oncogene homolog 1 (avian)              | -0.45 | ATGCATGCTGTTCCAACTAA    | NM_005238:    | NM_005238:                           |
| 2113   | ETS1    | v-ets erythroblastosis virus E26 oncogene homolog 1 (avian)              | 0.16  | CCGACGAGTGTAGGCACTGAA   | NM_005238:    | NM_005238:                           |
| 2114   | ETS2    | (v-ets v-ets erythroblastosis virus E26 oncogene homolog 2 (avian)       | 1.37  | AGGGATTTATGTAGCAGCTAT   | NM_005239:    | NM_005239:                           |
| 2114   | ETS2    | (v-ets v-ets erythroblastosis virus E26 oncogene homolog 2 (avian)       | -3.96 | CTGTGATGAGTCAAGCCTTA    | NM_005239:    | NM_005239:                           |



|        |        |                                                                     |       |                        |            |                                          |
|--------|--------|---------------------------------------------------------------------|-------|------------------------|------------|------------------------------------------|
| 2118   | ETV4   | ets variant gene 4 (E1A enhancer binding protein, E1AF)             | -2.67 | CCGGAGTCATGGGAAGGAAA   | NM_001986: | NM_001986:                               |
| 2118   | ETV4   | ets variant gene 4 (E1A enhancer binding protein, E1AF)             | -0.84 | CAGCAGAGCTTTAAGCAAGAA  | NM_001986: | NM_001986:                               |
| 2120   | ETV6   | ets variant gene 6 (TEL oncogene)                                   | -0.66 | CAGGTCACTATCAGCACAAA   | NM_001987: | NM_001987:                               |
| 2120   | ETV6   | ets variant gene 6 (TEL oncogene)                                   | 1.78  | CGCCCACTACTACAAACTAAA  | NM_001987: | NM_001987:                               |
| 51513  | ETV7   | ets variant gene 7 (TEL2 oncogene)                                  | -3.67 | CCCGATATGAGCCCTACATCA  | NM_016135: | NM_016135:                               |
| 51513  | ETV7   | ets variant gene 7 (TEL2 oncogene)                                  | -3.43 | CGCCCACTATTATAAGCTTAA  | NM_016135: | NM_016135:                               |
| 2122   | EV11   | ecotropic viral integration site 1                                  | -1.18 | CAGCACTACGTCCTCTTAAA   | NM_005241: | NM_005241:                               |
| 2122   | EV11   | ecotropic viral integration site 1                                  | 2.38  | CCAGTGCATCCAGTCCATAA   | NM_005241: | NM_005241:                               |
| 2123   | EV12A  | ecotropic viral integration site 2A                                 | 0.02  | GAGTAAACTGTGTAATTTAA   | NM_014210: | NM_014210:NM_001003927:                  |
| 2123   | EV12A  | ecotropic viral integration site 2A                                 | 0.21  | CATGGTAGACCTTGCAATTTA  | NM_014210: | NM_014210:NM_001003927:                  |
| 115704 | EV15L  | (ecotro ecotropic viral integration site 5-like                     | -2.32 | CCCGTTGCTCTGCTGAATCA   | NM_145245: | NM_145245:                               |
| 115704 | EV15L  | (ecotro ecotropic viral integration site 5-like                     | 0.04  | CCCGGAACACAGGATCTTCAA  | NM_145245: | NM_145245:                               |
| 51466  | EVL    | Enah/Vasp-like                                                      | -6.34 | CCGGATCAACATCTACCACAA  | NM_016337: | NM_016337:                               |
| 51466  | EVL    | Enah/Vasp-like                                                      | -0.19 | CAGGTTGTGATCAATTAATCA  | NM_016337: | NM_016337:                               |
| 2130   | EWSR1  | Ewing sarcoma breakpoint region 1                                   | -3.61 | CAAGAGGGCCCTTAACTGTA   | NM_005243: | NM_005243:                               |
| 2130   | EWSR1  | Ewing sarcoma breakpoint region 1                                   | 0.03  | CTGCATTGACTACCAAGATTA  | NM_005243: | NM_005243:                               |
| 9156   | EXO1   | exonuclease 1                                                       | 0.94  | ATGGATGTACTTTACCTTCTA  | NM_003686: | NM_003686:NM_006027:NM_130398:           |
| 9156   | EXO1   | exonuclease 1                                                       | 0.75  | CAGATGTAGCACGTAATTCAA  | NM_003686: | NM_003686:NM_006027:NM_130398:           |
| 23265  | EXOC7  | exocyst complex component 7                                         | 0.36  | AAGGCCCTTATCAGATTCATA  | NM_015219: | NM_015219:NM_001013839:                  |
| 23265  | EXOC7  | exocyst complex component 7                                         | -0.58 | CTGGTTAAAGGTGACTGATTA  | NM_015219: | NM_015219:NM_001013839:                  |
| 2131   | EXT1   | exostoses (multiple) 1                                              | 0.44  | CAGATTGTGCCAATATCCAA   | NM_000127: | NM_000127:                               |
| 2131   | EXT1   | exostoses (multiple) 1                                              | 1.83  | CACGGTGCTTTCAACAACAGA  | NM_000127: | NM_000127:                               |
| 2132   | EXT2   | exostoses (multiple) 2                                              | 1.06  | GAGGTTCTGGCTAACGTTAAA  | NM_000401: | NM_000401:NM_207122:                     |
| 2132   | EXT2   | exostoses (multiple) 2                                              | -1.34 | CCGGTGTTCTGGGAAGCGTA   | NM_000401: | NM_000401:NM_207122:                     |
| 2138   | EYA1   | eyes absent homolog 1 (Drosophila)                                  | -0.45 | AACTCGGTAACCTCATATAA   | NM_000503: | NM_172059:NM_172058:NM_000503:           |
| 2138   | EYA1   | eyes absent homolog 1 (Drosophila)                                  | -0.63 | CAGGAAATAATCACTACAAA   | NM_000503: | NM_172059:NM_172058:NM_000503:NM_172060: |
| 2070   | EYA4   | eyes absent homolog 4 (Drosophila)                                  | -0.07 | CAGTCCTATTAGACATGTAA   | NM_004100: | NM_172104:NM_172103:NM_172105:NM_004100: |
| 2070   | EYA4   | eyes absent homolog 4 (Drosophila)                                  | 0.51  | CAGCTTAGCAAAAGACTCTT   | NM_004100: | NM_172104:NM_172103:NM_172105:NM_004100: |
| 2145   | EZH1   | enhancer of zeste homolog 1 (Drosophila)                            | -1.86 | AAGCGCTAGCCTGTAATGTA   | NM_001991: | NM_001991:                               |
| 2145   | EZH1   | enhancer of zeste homolog 1 (Drosophila)                            | -0.59 | CGCGAAAGGCTATGACAAA    | NM_001991: | NM_001991:                               |
| 2146   | EZH2   | enhancer of zeste homolog 2 (Drosophila)                            | 0.02  | AACCATGTTTCAACATATCAA  | NM_004456: | NM_152998:NM_004456:                     |
| 2146   | EZH2   | enhancer of zeste homolog 2 (Drosophila)                            | -0.03 | CAGGATGGTACTTCTTATTGAA | NM_004456: | NM_152998:NM_004456:                     |
| 2159   | F10    | coagulation factor X                                                | -2.45 | CCGGTTCACAAAGGAGACCTA  | NM_000504: | NM_000504:                               |
| 2159   | F10    | coagulation factor X                                                | -1.61 | AACCATCTGAGCGAGTCTA    | NM_000504: | NM_000504:                               |
| 2160   | F11    | coagulation factor XI (plasma thromboplastin antecedent)            | 0.01  | CAAGATACCCTTAGTGACCAA  | NM_000128: | NM_000128:NM_019559:                     |
| 2160   | F11    | coagulation factor XI (plasma thromboplastin antecedent)            | -2.84 | CAGAAATACGAAGCTCGATA   | NM_000128: | NM_000128:NM_019559:                     |
| 50848  | F11R   | F11 receptor                                                        | 0.75  | ACCAGTCTATTTTAACTTA    | NM_016946: | NM_016946:NM_144502:NM_144503:NM_144504: |
| 50848  | F11R   | F11 receptor                                                        | -0.40 | CGAAGTGAAGGAGAATTCAA   | NM_016946: | NM_016946:NM_144502:NM_144503:NM_144504: |
| 2161   | F12    | coagulation factor XII (Hageman factor)                             | -0.92 | CAGGATGGCGAGGAACCTAAT  | NM_000505: | NM_000505:                               |
| 2161   | F12    | coagulation factor XII (Hageman factor)                             | -3.84 | CCCGTGGTCTGCTGCTGAA    | NM_000505: | NM_000505:                               |
| 2162   | F13A1  | coagulation factor XIII, A1 polypeptide                             | -1.43 | TACAATGTAATAGAAGCTTAA  | NM_000129: | NM_000129:                               |
| 2162   | F13A1  | coagulation factor XIII, A1 polypeptide                             | 0.09  | AGCGTTGACATCTTATTGGAA  | NM_000129: | NM_000129:                               |
| 2165   | F13B   | coagulation factor XIII, B polypeptide                              | 0.31  | AGGCCTATTGTTTATGATGAA  | NM_001994: | NM_001994:                               |
| 2165   | F13B   | coagulation factor XIII, B polypeptide                              | 0.64  | AAAGTCTTACATGGAGATTTA  | NM_001994: | NM_001994:                               |
| 2147   | F2     | coagulation factor II (thrombin)                                    | -1.58 | AAGTACGAGCGAACATTTGA   | NM_000506: | NM_000506:                               |
| 2147   | F2     | coagulation factor II (thrombin)                                    | 0.28  | CCGCACAGGTACGAGCGAAA   | NM_000506: | NM_000506:                               |
| 2149   | F2R    | coagulation factor II (thrombin) receptor                           | -0.30 | CAGTATAGAATAGGCACCTTA  | NM_001992: | NM_001992:                               |
| 2149   | F2R    | coagulation factor II (thrombin) receptor                           | -0.82 | TAGAGTGTGATGTATGTGTA   | NM_001992: | NM_001992:                               |
| 2150   | F2RL1  | coagulation factor II (thrombin) receptor-like 1                    | 0.89  | ATAGTCGTGAATCTTGTTCOA  | NM_005242: | NM_005242:                               |
| 2150   | F2RL1  | coagulation factor II (thrombin) receptor-like 1                    | -3.58 | CCGAAGTGTCCGCACTGTAAA  | NM_005242: | NM_005242:                               |
| 2151   | F2RL2  | coagulation factor II (thrombin) receptor-like 2                    | -0.11 | CAGGAGCCACGATTAAGTAAA  | NM_004101: | NM_004101:                               |
| 2151   | F2RL2  | coagulation factor II (thrombin) receptor-like 2                    | 0.98  | CAGTTAGGATACATCACTAAA  | NM_004101: | NM_004101:                               |
| 9002   | F2RL3  | coagulation factor II (thrombin) receptor-like 3                    | 0.26  | AAGGCTGTACTGGGTCGAACA  | NM_003950: | NM_003950:                               |
| 9002   | F2RL3  | coagulation factor II (thrombin) receptor-like 3                    | -0.55 | CACATTCACGTAAGTGTGCAA  | NM_003950: | NM_003950:                               |
| 2152   | F3     | coagulation factor III (thromboplastin, tissue factor)              | 0.50  | ACTGACTTAAGTGGCATTTAAA | NM_001993: | NM_001993:                               |
| 2152   | F3     | coagulation factor III (thromboplastin, tissue factor)              | -0.29 | AACGAATGGTACTACAACCAA  | NM_001993: | NM_001993:                               |
| 2153   | F5     | coagulation factor V (proaccelerin, labile factor)                  | -0.18 | CGCCATTAATGGGATGATCTA  | NM_000130: | NM_000130:                               |
| 2153   | F5     | coagulation factor V (proaccelerin, labile factor)                  | 0.04  | CCCATTCAGACCCCTGATCAA  | NM_000130: | NM_000130:                               |
| 2155   | F7     | (coagulation factor VII (serum prothrombin conversion accelerator)  | 0.72  | CTGGTCTTATCCATATATCA   | NM_000131: | NM_000131:NM_019616:                     |
| 2155   | F7     | (coagulation factor VII (serum prothrombin conversion accelerator)  | -0.08 | TGCAACTGTCTGGCCACCAA   | NM_000131: | NM_000131:NM_019616:                     |
| 2157   | F8     | coagulation factor VIII, procoagulant component (hemophilia A)      | 1.08  | ACGAGTGCCATAGATATAAA   | NM_019863: | NM_019863:NM_000132:                     |
| 2157   | F8     | coagulation factor VIII, procoagulant component (hemophilia A)      | 0.63  | CAGGAGGGTGCATCCCAATTTA | NM_019863: | NM_019863:NM_000132:                     |
| 2158   | F9     | coagulation factor IX (plasma thromboplastic component, Christmas d | -0.77 | CACGAAGCCAGATTGGCATA   | NM_000133: | NM_000133:                               |
| 2158   | F9     | coagulation factor IX (plasma thromboplastic component, Christmas d | 0.06  | TACAAAGTTCACCATCTATA   | NM_000133: | NM_000133:                               |
| 2166   | FAAH   | fatty acid amide hydrolase                                          | -0.31 | CAAGGCCCAACTAACAGTCAA  | NM_001441: | NM_001441:                               |
| 2166   | FAAH   | fatty acid amide hydrolase                                          | -0.49 | CCGGCGGAGTGCGACAGCGTA  | NM_001441: | NM_001441:                               |
| 2167   | FABP4  | fatty acid binding protein 4, adipocyte                             | 1.89  | CAATATGGTACTGTTGGTTAA  | NM_001442: | NM_001442:                               |
| 2167   | FABP4  | fatty acid binding protein 4, adipocyte                             | 0.16  | CCTGATTAGCAAGCAAGTAA   | NM_001442: | NM_001442:                               |
| 8772   | FADD   | Fas (TNFRSF6)-associated via death domain                           | -0.68 | AGCGGGATCTGATCTTTTAA   | NM_003824: | NM_003824:                               |
| 8772   | FADD   | Fas (TNFRSF6)-associated via death domain                           | -1.08 | CAGCGGGATCTGATCTTTTAA  | NM_003824: | NM_003824:                               |
| 11124  | FAF1   | Fas (TNFRSF6) associated factor 1                                   | 0.48  | AAGGACGAGGATGAACGTGAA  | NM_007051: | NM_131917:NM_007051:                     |
| 11124  | FAF1   | Fas (TNFRSF6) associated factor 1                                   | -0.57 | CAGGCATGTACTGGCATTGAA  | NM_007051: | NM_131917:NM_007051:                     |
| 2184   | FAH    | (fumaryl) fumarylacetoacetate hydrolase (fumarylacetoacetase)       | 0.14  | CGCCATTCAGTGACAATAAAA  | NM_000137: | NM_000137:                               |
| 2184   | FAH    | (fumaryl) fumarylacetoacetate hydrolase (fumarylacetoacetase)       | 0.52  | CCGCCATTGAGTACAATAAAA  | NM_000137: | NM_000137:                               |
| 9214   | FAM3   | Fas apoptotic inhibitory molecule 3                                 | -0.64 | CAGGTTGGGCTTACACAAA    | NM_005449: | NM_005449:                               |
| 9214   | FAM3   | Fas apoptotic inhibitory molecule 3                                 | -0.04 | CCGAGTACTCTGAAGCAATA   | NM_005449: | NM_005449:                               |
| 2186   | FALZ   | fetal Alzheimer antigen                                             | 0.17  | AACGCCCTTATGATGAATCTAA | NM_004459: | NM_004459:NM_182641:                     |
| 2186   | FALZ   | fetal Alzheimer antigen                                             | 1.22  | AAGCATAATGCTGTAATAGAA  | NM_004459: | NM_004459:NM_182641:                     |
| 54097  | FAM3B  | family with sequence similarity 3, member B                         | -0.56 | CTGGGATTTTATTGAGCAAAA  | NM_058186: | NM_206964:NM_058186:                     |
| 54097  | FAM3B  | family with sequence similarity 3, member B                         | -1.51 | CAGGTCTAGCTGGTATTTTAT  | NM_058186: | NM_206964:NM_058186:                     |
| 9679   | FAM53B | family with sequence similarity 53, member B                        | 1.75  | TACTTGACTGTGTAATAAAA   | NM_014661: | NM_014661:                               |
| 9679   | FAM53B | family with sequence similarity 53, member B                        | -2.02 | CGGAGATGCTTCTCTCTGTA   | NM_014661: | NM_014661:                               |
| 79850  | FAM57A | family with sequence similarity 57, member A                        | 0.33  | CCCGATCAACTAGGATGAATT  | NM_024792: | NM_024792:                               |
| 79850  | FAM57A | family with sequence similarity 57, member A                        | 0.78  | TAGGTAGTTATTGATCGTTTA  | NM_024792: | NM_024792:                               |
| 57795  | FAM5B  | family with sequence similarity 5, member B                         | 0.36  | CCACCTGAACATCTAAGTAAA  | NM_021165: | NM_021165:                               |
| 57795  | FAM5B  | family with sequence similarity 5, member B                         | 0.03  | AAAGTATTCTTTCATTTCAA   | NM_021165: | NM_021165:                               |
| 23344  | FAM62A | family with sequence similarity 62 (C2 domain containing), member A | -0.47 | ACGCCCGACCCAGACATCAA   | NM_015292: | NM_015292:                               |
| 23344  | FAM62A | family with sequence similarity 62 (C2 domain containing), member A | -0.99 | GTGGGAGATAGTTCATATAA   | NM_015292: | NM_015292:                               |
| 54629  | FAM63B | family with sequence similarity 63, member B                        | -0.78 | TAGCACCATGACCAAAATCAA  | NM_019092: | NM_019092:                               |
| 54629  | FAM63B | family with sequence similarity 63, member B                        | -0.40 | AAGCCTTCCATCAAGTGGAA   | NM_019092: | NM_019092:                               |
| 54478  | FAM64A | family with sequence similarity 64, member A                        | 0.23  | CCACCCATTACGGGATCAA    | NM_019013: | NM_019013:                               |
| 54478  | FAM64A | family with sequence similarity 64, member A                        | -0.12 | CCGCCAAGGCTTACTACTCAA  | NM_019013: | NM_019013:                               |
| 23625  | FAM89B | family with sequence similarity 89, member B                        | -0.23 | CAGGGCGGTAGATAAATAAA   | NM_152832: | NM_152832:                               |
| 23625  | FAM89B | family with sequence similarity 89, member B                        | 0.20  | CCCGTGTGGATATTTAAATT   | NM_152832: | NM_152832:                               |

|        |        |                                                                      |       |                        |            |                                                                                      |
|--------|--------|----------------------------------------------------------------------|-------|------------------------|------------|--------------------------------------------------------------------------------------|
| 2175   | FANCA  | Fanconi anemia, complementation group A                              | -2.20 | CAGCATATTCAGGAGGCCTTA  | NM_000135: | NM_000135:                                                                           |
| 2175   | FANCA  | Fanconi anemia, complementation group A                              | -1.33 | CAGCGTTGAGATACAAAGAT   | NM_000135: | NM_000135:                                                                           |
| 2176   | FANCC  | Fanconi anemia, complementation group C                              | 1.27  | CGCGAGGACCACCCGATTAA   | NM_000136: | NM_000136:                                                                           |
| 2176   | FANCC  | Fanconi anemia, complementation group C                              | 1.74  | GGCATTGTTAGTGAAGCTAA   | NM_000136: | NM_000136:                                                                           |
| 2177   | FANCD2 | Fanconi anemia, complementation group D2                             | 1.15  | ACGGGAGAGAGTCAAGTCAA   | NM_033084: | NM_001018115:NM_033084:                                                              |
| 2177   | FANCD2 | Fanconi anemia, complementation group D2                             | -0.27 | TTGGAGGAGATTGATGCTCA   | NM_033084: | NM_001018115:NM_033084:                                                              |
| 2178   | FANCE  | Fanconi anemia, complementation group E                              | -2.91 | AACGCCGAGGAGAGCTGTAA   | NM_021922: | NM_021922:                                                                           |
| 2178   | FANCE  | Fanconi anemia, complementation group E                              | -0.18 | TAGCCTGAGGATAAAGGCTGA  | NM_021922: | NM_021922:                                                                           |
| 2188   | FANCF  | Fanconi anemia, complementation group F                              | 1.35  | AACCAGCATTAGAGCTTTATA  | NM_022725: | NM_022725:                                                                           |
| 2188   | FANCF  | Fanconi anemia, complementation group F                              | -0.29 | ATGCCTTTGGATACATAAATA  | NM_022725: | NM_022725:                                                                           |
| 2189   | FANCG  | Fanconi anemia, complementation group G                              | 0.31  | CCCAGGTAATCGAGACACTTA  | NM_004629: | NM_004629:                                                                           |
| 2189   | FANCG  | Fanconi anemia, complementation group G                              | -7.12 | CGCGGGAACCTACTTTCAA    | NM_004629: | NM_004629:                                                                           |
| 2191   | FAP    | fibroblast activation protein, alpha                                 | 0.53  | CGCACTGATCAAGAAATTA    | NM_004460: | NM_004460:                                                                           |
| 2191   | FAP    | fibroblast activation protein, alpha                                 | -2.47 | TCGCCTTTGGGAGTAAATTA   | NM_004460: | NM_004460:                                                                           |
| 355    | FAS    | Fas (TNF receptor superfamily, member 6)                             | -0.71 | AAGGACATTACTAGTGACTCA  | NM_000043: | NM_152875:NM_152876:NM_152877:NM_000043:<br>NM_152873:NM_152871:NM_152874:NM_152872: |
| 355    | FAS    | Fas (TNF receptor superfamily, member 6)                             | 1.10  | CACATTGATTAAGATCTCAA   | NM_000043: | NM_152875:NM_152876:NM_152877:NM_000043:<br>NM_152873:NM_152871:NM_152874:NM_152872: |
| 356    | FASLG  | Fas ligand (TNF superfamily, member 6)                               | 0.25  | ATCGGTGAACTACACGATAA   | NM_000639: | NM_000639:                                                                           |
| 356    | FASLG  | Fas ligand (TNF superfamily, member 6)                               | 1.69  | GAGGCTTGCATAATAAGCTAA  | NM_000639: | NM_000639:                                                                           |
| 2194   | FASN   | fatty acid synthase                                                  | -0.61 | CCGCCATGCAACGGGATTGAA  | NM_004104: | NM_004104:                                                                           |
| 2194   | FASN   | fatty acid synthase                                                  | 0.53  | TCCAGGTATGCGACGGGAAA   | NM_004104: | NM_004104:                                                                           |
| 10922  | FASTK  | Fas-activated serine/threonine kinase                                | -1.99 | CAGCAGCAAGGTGGTACAGAA  | NM_006712: | NM_006712:NM_033015:                                                                 |
| 10922  | FASTK  | Fas-activated serine/threonine kinase                                | 1.26  | CTGGTGGTTACAGAAACGCAA  | NM_006712: | NM_006712:NM_033015:                                                                 |
| 2195   | FAT    | FAT tumor suppressor homolog 1 (Drosophila)                          | -2.89 | CAGGCTGGATTACAACITTTAA | NM_005245: | NM_005245:                                                                           |
| 2195   | FAT    | FAT tumor suppressor homolog 1 (Drosophila)                          | 1.45  | CCCTACTACGCGTTGTATTA   | NM_005245: | NM_005245:                                                                           |
| 2196   | FAT2   | FAT tumor suppressor homolog 2 (Drosophila)                          | 0.63  | ACCAAGGTGATTGATTGGCTA  | NM_001447: | NM_001447:                                                                           |
| 2196   | FAT2   | FAT tumor suppressor homolog 2 (Drosophila)                          | -0.02 | CACCCACAACITTTGAATTTA  | NM_001447: | NM_001447:                                                                           |
| 2197   | FAU    | Finkel-Biskis-Reilly murine sarcoma virus (FBR-MuSV) ubiquitously ex | -0.72 | AAGCCACTTAGTTCAGTCAAA  | NM_001997: | NM_001997:                                                                           |
| 2197   | FAU    | Finkel-Biskis-Reilly murine sarcoma virus (FBR-MuSV) ubiquitously ex | -4.08 | CGGCGTTTCAGTCGCAATAT   | NM_001997: | NM_001997:                                                                           |
| 2200   | FBN1   | fibriillin 1 (Marfan syndrome)                                       | -8.07 | CCGGATTTACCAACACCATATA | NM_000138: | NM_000138:                                                                           |
| 2200   | FBN1   | fibriillin 1 (Marfan syndrome)                                       | 0.68  | CAGTGCATGATCGTAATGAA   | NM_000138: | NM_000138:                                                                           |
| 2201   | FBN2   | fibriillin 2 (congenital contractural arachnodycty)                  | 0.31  | TTTCAATTAATCTGATGTTATA | NM_001999: | NM_001999:                                                                           |
| 2201   | FBN2   | fibriillin 2 (congenital contractural arachnodycty)                  | -1.14 | CAGGATTTGCCATATGTCGAAA | NM_001999: | NM_001999:                                                                           |
| 2203   | FBP1   | fructose-1,6-bisphosphatase 1                                        | -2.87 | CTCGCTCTGACACAGCACTAA  | NM_000507: | NM_000507:                                                                           |
| 2203   | FBP1   | fructose-1,6-bisphosphatase 1                                        | -0.26 | TTCTAGAGAGCAAGAAATAAA  | NM_000507: | NM_000507:                                                                           |
| 8789   | FBP2   | fructos fructose-1,6-bisphosphatase 2                                | -0.53 | AGGACCTTAATGAAACGATAA  | NM_003837: | NM_003837:                                                                           |
| 8789   | FBP2   | fructos fructose-1,6-bisphosphatase 2                                | -0.53 | CAGGTTATGCGCTGTACGGTAA | NM_003837: | NM_003837:                                                                           |
| 84678  | FBXL10 | F-box and leucine-rich repeat protein 10                             | 1.42  | AGGAGTGGACTAGAAGTTTAA  | NM_032590: | NM_032590:NM_001005366:                                                              |
| 84678  | FBXL10 | F-box and leucine-rich repeat protein 10                             | 0.22  | TAGGAGTGGACTAGAAGTTTAA | NM_032590: | NM_032590:NM_001005366:                                                              |
| 22992  | FBXL11 | F-box and leucine-rich repeat protein 11                             | -0.70 | ACCCATTTCTGTGCTACCCAA  | NM_012308: | NM_012308:                                                                           |
| 22992  | FBXL11 | F-box and leucine-rich repeat protein 11                             | -0.20 | CTCACTGGAGTTCTATAGTA   | NM_012308: | NM_012308:                                                                           |
| 54850  | FBXL12 | F-box and leucine-rich repeat protein 12                             | 0.37  | AATGATCGATATGCTCATAAA  | NM_017703: | NM_017703:                                                                           |
| 54850  | FBXL12 | F-box and leucine-rich repeat protein 12                             | 2.14  | TGCGGATTCATGATGCTGATAT | NM_017703: | NM_017703:                                                                           |
| 144699 | FBXL14 | F-box and leucine-rich repeat protein 14                             | 0.09  | CAATCATTTATCTTCAATTA   | NM_152441: | NM_152441:                                                                           |
| 144699 | FBXL14 | F-box and leucine-rich repeat protein 14                             | 0.17  | ATGTATTACTGAGAACGTAATA | NM_152441: | NM_152441:                                                                           |
| 79176  | FBXL15 | F-box and leucine-rich repeat protein 15                             | 1.38  | CACCCCTGGAGCTTCAATATA  | XM_370575: | NM_024326:                                                                           |
| 79176  | FBXL15 | F-box and leucine-rich repeat protein 15                             | -0.67 | CTGAGCTGTAGGGAAACGTA   | XM_370575: | NM_024326:                                                                           |
| 64839  | FBXL17 | F-box and leucine-rich repeat protein 17                             | 0.08  | ACGAGAGGGTAGTACATTTAA  | NM_022824: | NM_022824:                                                                           |
| 64839  | FBXL17 | F-box and leucine-rich repeat protein 17                             | 0.11  | ACGAAAGTTAATATACATTTA  | NM_022824: | NM_022824:                                                                           |
| 80028  | FBXL18 | F-box and leucine-rich repeat protein 18                             | 0.80  | CAGCCAGTTCTGTGTTGTTGA  | NM_024963: | NM_024963:                                                                           |
| 80028  | FBXL18 | F-box and leucine-rich repeat protein 18                             | -2.68 | CGCGCGGCTTTGGCAAGAAA   | NM_024963: | NM_024963:                                                                           |
| 54620  | FBXL19 | F-box and leucine-rich repeat protein 19                             | 1.47  | TACAATACGGTTTGTCTATAA  | NM_019085: | NM_019085:                                                                           |
| 54620  | FBXL19 | F-box and leucine-rich repeat protein 19                             | 0.26  | CGGGTCTGTACAATACGGTT   | NM_019085: | NM_019085:                                                                           |
| 25827  | FBXL2  | F-box and leucine-rich repeat protein 2                              | 0.21  | TAGTTTCCATGAGACACCAA   | NM_012157: | NM_012157:                                                                           |
| 25827  | FBXL2  | F-box and leucine-rich repeat protein 2                              | 0.95  | TACCTAGGTACGAAAGTCTTA  | NM_012157: | NM_012157:                                                                           |
| 84961  | FBXL20 | F-box and leucine-rich repeat protein 20                             | -0.38 | CTTGGCGAACTGAGTATTTAA  | NM_032875: | NM_032875:                                                                           |
| 84961  | FBXL20 | F-box and leucine-rich repeat protein 20                             | 1.50  | GACCCATTTACCAATATTTAA  | NM_032875: | NM_032875:                                                                           |
| 26224  | FBXL3  | F-box and leucine-rich repeat protein 3                              | 0.25  | AAGGCTTATCTAGATTCGAAA  | NM_012158: | NM_012158:                                                                           |
| 26224  | FBXL3  | F-box and leucine-rich repeat protein 3                              | 0.26  | TTGGAATTACATAGTTATGTA  | NM_012158: | NM_012158:                                                                           |
| 26235  | FBXL4  | F-box and leucine-rich repeat protein 4                              | 0.08  | AACGACTTGTCTCTATCGAA   | NM_012160: | NM_012160:                                                                           |
| 26235  | FBXL4  | F-box and leucine-rich repeat protein 4                              | -0.28 | TCCGAATTAGTACGCTTGAA   | NM_012160: | NM_012160:                                                                           |
| 26234  | FBXL5  | F-box and leucine-rich repeat protein 5                              | 0.01  | TTGGTAAAGCCATGTCAATTTA | NM_012161: | NM_012161:NM_033535:                                                                 |
| 26234  | FBXL5  | F-box and leucine-rich repeat protein 5                              | 1.31  | ATGCCTTTTGCAGCAGTTTAA  | NM_012161: | NM_012161:NM_033535:                                                                 |
| 23194  | FBXL7  | F-box and leucine-rich repeat protein 7                              | -2.61 | AAGTCTCACTAGGAAATTTA   | NM_012304: | NM_012304:                                                                           |
| 23194  | FBXL7  | F-box and leucine-rich repeat protein 7                              | -5.30 | ACCCATGGACATCTTGTCAA   | NM_012304: | NM_012304:                                                                           |
| 55336  | FBXL8  | F-box and leucine-rich repeat protein 8                              | 0.00  | AAGCATGCTGCCACCTTATC   | NM_018378: | NM_018378:                                                                           |
| 55336  | FBXL8  | F-box and leucine-rich repeat protein 8                              | -0.11 | AATCGAGCTGCTGATGTTCT   | NM_018378: | NM_018378:                                                                           |
| 26267  | FBXO10 | F-box protein 10                                                     | -1.18 | CCCGGTTACTTGGCAAGTGAA  | XM_291314: | XM_291314:                                                                           |
| 26267  | FBXO10 | F-box protein 10                                                     | -0.18 | CCAGGTGTGTACGAAAGGCAA  | XM_291314: | XM_291314:                                                                           |
| 80204  | FBXO11 | F-box protein 11                                                     | 0.51  | CTGCTTAGAGATTACAGTAAA  | NM_012167: | NM_025133:NM_018693:NM_012167:                                                       |
| 80204  | FBXO11 | F-box protein 11                                                     | -3.35 | CAGGTGTATGGATTACCTCAA  | NM_012167: | NM_025133:NM_018693:NM_012167:                                                       |
| 201456 | FBXO15 | F-box protein 15                                                     | -1.75 | ATGGCATCTTTAATTTGCAA   | NM_152676: | NM_152676:                                                                           |
| 201456 | FBXO15 | F-box protein 15                                                     | -0.68 | ATCAGTTACTGTTATATGGTA  | NM_152676: | NM_152676:                                                                           |
| 157574 | FBXO16 | F-box protein 16                                                     | 1.52  | TACGGTTAATCTGGTACATCA  | NM_172366: | NM_172366:                                                                           |
| 157574 | FBXO16 | F-box protein 16                                                     | 0.03  | TCCAAGGGTGTATCTTTTATA  | NM_172366: | NM_172366:                                                                           |
| 115290 | FBXO17 | F-box protein 17                                                     | -0.05 | CTGCCTGACGTTGTCAAGTCAA | NM_024907: | NM_024907:NM_148169:                                                                 |
| 115290 | FBXO17 | F-box protein 17                                                     | 1.03  | CTCGGTGGACTCAGTCACAAA  | NM_024907: | NM_024907:NM_148169:                                                                 |
| 84893  | FBXO18 | F-box protein, helicase, 18                                          | -1.38 | CACCGTCTTACCATGAAGAA   | NM_032807: | NM_032807:NM_178150:                                                                 |
| 84893  | FBXO18 | F-box protein, helicase, 18                                          | -2.12 | TAGGGCGGAAGTACCAGTCAA  | NM_032807: | NM_032807:NM_178150:                                                                 |
| 26232  | FBXO2  | F-box protein 2                                                      | 0.37  | AACGATGAGAGGCTCAAGAA   | NM_012168: | NM_012168:                                                                           |
| 26232  | FBXO2  | F-box protein 2                                                      | -5.22 | AAGCTCACCGTTAAGCTACTG  | NM_012168: | NM_012168:                                                                           |
| 26263  | FBXO22 | F-box protein 22                                                     | 2.28  | CCAAATCTGTTTGGTACAAA   | NM_012170: | NM_012170:                                                                           |
| 26263  | FBXO22 | F-box protein 22                                                     | -1.02 | AAGTGGGAGCGAGTAAATTA   | NM_012170: | NM_012170:NM_147188:                                                                 |
| 26261  | FBXO24 | F-box protein 24                                                     | -1.27 | CAGGCGAGTGTGACTGCAAGAA | NM_012172: | NM_033506:NM_012172:                                                                 |
| 26261  | FBXO24 | F-box protein 24                                                     | 0.03  | CCCAAGGTGTGACACAGTTTA  | NM_012172: | NM_033506:NM_012172:                                                                 |
| 126433 | FBXO27 | F-box protein 27                                                     | 0.37  | CTGCCAATCATATGTAATAAA  | NM_178820: | NM_178820:                                                                           |
| 126433 | FBXO27 | F-box protein 27                                                     | 1.89  | CAGCTGAAAGTCTACGTTAAA  | NM_178820: | NM_178820:                                                                           |
| 23219  | FBXO28 | F-box protein 28                                                     | -0.01 | CAAGCTTCTTACCCTAGAAA   | NM_015176: | NM_015176:                                                                           |
| 23219  | FBXO28 | F-box protein 28                                                     | 0.53  | TAGGAACAGAGACTTTAAA    | NM_015176: | NM_015176:                                                                           |
| 26273  | FBXO3  | F-box protein 3                                                      | 1.85  | TGCCTAAGACCTTGACTTTAA  | NM_012175: | NM_012175:NM_033406:                                                                 |
| 26273  | FBXO3  | F-box protein 3                                                      | 0.98  | GTCCGGTATATGAATACACAA  | NM_012175: | NM_012175:NM_033406:                                                                 |
| 84085  | FBXO30 | F-box protein 30                                                     | 0.16  | CAGACCGGAAATCATATGAAA  | NM_032145: | NM_032145:                                                                           |
| 84085  | FBXO30 | F-box protein 30                                                     | 0.00  | CAGAATTTACATGGTGAATCA  | NM_032145: | NM_032145:                                                                           |
| 79791  | FBXO31 | F-box protein 31                                                     | -2.58 | CAGAGTCAGAAATTTGCAAAA  | NM_024735: | NM_024735:                                                                           |
| 79791  | FBXO31 | F-box protein 31                                                     | 1.60  | CCCATATGAGATGACGAGGAA  | NM_024735: | NM_024735:                                                                           |
| 254170 | FBXO33 | F-box protein 33                                                     | -1.95 | ATCCTGAGTAATGATAGGCAA  | NM_203301: | NM_203301:                                                                           |

|        |        |                                                                        |       |                        |                      |                                                 |
|--------|--------|------------------------------------------------------------------------|-------|------------------------|----------------------|-------------------------------------------------|
| 254170 | FBXO33 | F-box protein 33                                                       | -0.92 | CTGCTAGATTGTAATATTTAA  | NM_203301:           | NM_203301:                                      |
| 55030  | FBXO34 | F-box protein 34                                                       | -1.12 | TCGGTAAAGCATCATCTCGAA  | NM_017943:           | NM_017943:                                      |
| 55030  | FBXO34 | F-box protein 34                                                       | -0.27 | AAGAACTCTAATAGTTGAA    | NM_017943:           | NM_017943:                                      |
| 130888 | FBXO36 | F-box protein 36                                                       | 1.27  | AGAGGTTTCTATTGTATATA   | NM_174899:           | NM_174899:                                      |
| 130888 | FBXO36 | F-box protein 36                                                       | -0.08 | CACCGTATTCTGAGGTCAAA   | NM_174899:           | NM_174899:                                      |
| 81545  | FBXO38 | F-box protein 38                                                       | -0.38 | TTGCTCGATACGACTTTGAA   | NM_030793:           | NM_030793.NM_205836:                            |
| 81545  | FBXO38 | F-box protein 38                                                       | -0.31 | CTGGATGGACACTATAGCAA   | NM_030793:           | NM_030793.NM_205836:                            |
| 26272  | FBXO4  | F-box protein 4                                                        | -2.61 | CAGTGTGATCCACAGATCA    | NM_012176:           | NM_012176.NM_033484:                            |
| 26272  | FBXO4  | F-box protein 4                                                        | -0.26 | CAGATTGATGGTATTGGATCA  | NM_012176:           | NM_012176.NM_033484:                            |
| 51725  | FBXO40 | F-box protein 40                                                       | 0.68  | CACCATTATTTGGGAGAACAT  | NM_016298:           | NM_016298:                                      |
| 51725  | FBXO40 | F-box protein 40                                                       | 0.10  | GAGGAAGATACGCTCCTAAA   | NM_016298:           | NM_016298:                                      |
| 54455  | FBXO42 | F-box protein 42                                                       | -0.18 | CTGGGATCAAATCTCCATTAA  | XM_048774:           | NM_018994:                                      |
| 54455  | FBXO42 | F-box protein 42                                                       | -0.03 | CTCCTGTGTGATGATGATA    | XM_048774:           | NM_018994:                                      |
| 93611  | FBXO44 | F-box protein 44                                                       | -2.35 | CGGACATTGGATGAAGCCGAA  | NM_033182:           | NM_183412.NM_183413.NM_033182.NM_0010147<br>65: |
| 93611  | FBXO44 | F-box protein 44                                                       | 1.30  | CCCGAAAGTCTTGACCTGAA   | NM_033182:           | NM_183412.NM_183413.NM_033182.NM_0010147<br>65: |
| 200933 | FBXO45 | F-box protein 45                                                       | -0.40 | CAGACGTTACTATTATCCCTA  | XM_117294:           | XM_117294:                                      |
| 200933 | FBXO45 | F-box protein 45                                                       | -0.45 | CCCATGGGACTTGAATACAA   | XM_117294:           | XM_117294:                                      |
| 23403  | FBXO46 | F-box protein 46                                                       | 0.47  | CTAGATGGTTTGCCATTAAA   | XM_371179:           | XM_371179:                                      |
| 23403  | FBXO46 | F-box protein 46                                                       | 0.66  | CAGCGATAGCTCCAAGGCCAA  | XM_371179:           | XM_371179:                                      |
| 26271  | FBXO5  | F-box protein 5                                                        | 1.38  | AGCGCTTGCATAACAGGAAA   | NM_012177:           | NM_012177:                                      |
| 26271  | FBXO5  | F-box protein 5                                                        | -0.46 | CATGTTCAATCCGGACTTAA   | NM_012177:           | NM_012177:                                      |
| 26270  | FBXO6  | F-box protein 6                                                        | -0.45 | AATGTTTGCATGCCAATTGA   | NM_018438:           | NM_018438:                                      |
| 26270  | FBXO6  | F-box protein 6                                                        | -0.45 | AATGTTTGCATGCCAATTGA   | NM_018438:           | NM_018438:                                      |
| 26270  | FBXO6  | F-box protein 6                                                        | -1.58 | AATCGTGGTTAAGGACTGGTT  | NM_018438:           | NM_018438:                                      |
| 25793  | FBXO7  | F-box protein 7                                                        | -0.10 | CACAGATTGGAAGAAGACTGTA | NM_012179:           | NM_012179.NM_001033024:                         |
| 25793  | FBXO7  | F-box protein 7                                                        | 0.64  | GACAATAGCTCAGAGTTCAA   | NM_012179:           | NM_012179.NM_001033024:                         |
| 26269  | FBXO8  | F-box protein 8                                                        | 0.14  | GTGCATTAGATTTCCTGAAA   | NM_012180:           | NM_012180:                                      |
| 26269  | FBXO8  | F-box protein 8                                                        | 0.25  | ACAGCTGTTAACGAATGATA   | NM_012180:           | NM_012180:                                      |
| 26268  | FBXO9  | F-box protein 9                                                        | 0.71  | ACACGTTATGTTAAAGTGAA   | NM_012347:           | NM_012347.NM_033481.NM_033480:                  |
| 26268  | FBXO9  | F-box protein 9                                                        | 0.52  | ATGATAGTACACGTTATGTTA  | NM_012347:           | NM_012347.NM_033481.NM_033480:                  |
| 23291  | FBXW11 | F-box and WD-40 domain protein 11                                      | 0.16  | CACCTGGATAGTCTAATTCTA  | NM_012300:           | NM_033644.NM_033645.NM_012300:                  |
| 23291  | FBXW11 | F-box and WD-40 domain protein 11                                      | 0.36  | CAGAAGTAAATCGACCGCTCA  | NM_012300:           | NM_033644.NM_033645.NM_012300:                  |
| 285231 | FBXW12 | F-box and WD-40 domain protein 12                                      | 0.44  | CACCTTGTATCTACCAACCAA  | NM_207102:           | NM_207102:                                      |
| 285231 | FBXW12 | F-box and WD-40 domain protein 12                                      | 0.20  | CTGACTTAGCTTTGAAGCGAA  | NM_207102:           | NM_207102:                                      |
| 26190  | FBXW2  | F-box and WD-40 domain protein 2                                       | 0.62  | CACGAGTGCACAACTATTA    | NM_012164:           | NM_012164:                                      |
| 26190  | FBXW2  | F-box and WD-40 domain protein 2                                       | -1.38 | CCAGTGGGACTTTGCCAGTTA  | NM_012164:           | NM_012164:                                      |
| 6468   | FBXW4  | F-box and WD-40 domain protein 4                                       | -1.79 | CAGCACCTTCACTGTCAAGTA  | NM_022039:           | NM_022039:                                      |
| 6468   | FBXW4  | F-box and WD-40 domain protein 4                                       | 1.07  | TGGGAAGATTGGCATTATA    | NM_022039:           | NM_022039:                                      |
| 6468   | FBXW4  | F-box and WD-40 domain protein 4                                       | -0.84 | CCGAGTGAAGGTGTCTCAGAA  | NM_012165:           | NM_012165:                                      |
| 54461  | FBXW5  | F-box and WD-40 domain protein 5                                       | 0.12  | CCCGTTCAGGGCCCTGAATA   | NM_018998:           | NM_178225.NM_178226.NM_018998:                  |
| 54461  | FBXW5  | F-box and WD-40 domain protein 5                                       | -2.63 | CACGAGGATGTGTCAACTCA   | NM_018998:           | NM_178225.NM_178226.NM_018998:                  |
| 55294  | FBXW7  | F-box and WD-40 domain protein 7 (archipelago homolog, Drosophila)     | 1.45  | CTGGTTGACTTTCTAATAGA   | NM_018315:           | NM_033632.NM_018315.NM_001013415:               |
| 55294  | FBXW7  | F-box and WD-40 domain protein 7 (archipelago homolog, Drosophila)     | 0.31  | AAGGAAGTCAATAATATCAA   | NM_018315:           | NM_033632.NM_018315.NM_001013415:               |
| 26259  | FBXW8  | F-box and WD-40 domain protein 8                                       | -1.36 | TCGGTAGTGTCTAATATTA    | NM_012174:           | NM_153348.NM_012174:                            |
| 26259  | FBXW8  | F-box and WD-40 domain protein 8                                       | 0.32  | AACCAATAGTTAGTTAATATA  | NM_012174:           | NM_153348.NM_012174:                            |
| 84261  | FBXW9  | F-box and WD-40 domain protein 9                                       | 0.15  | TAGGCACTAAGCGAAATAGTA  | NM_032301:           | NM_032301:                                      |
| 84261  | FBXW9  | F-box and WD-40 domain protein 9                                       | 0.00  | CAGGTTCTGATCAAGACCTTA  | NM_032301:           | NM_032301:                                      |
| 83953  | FCAMR  | Fc receptor, IgA, IgM, high affinity                                   | 1.61  | CCAGGTTAAGTACTCTTAA    | NM_032029:           | NM_032029:                                      |
| 83953  | FCAMR  | Fc receptor, IgA, IgM, high affinity                                   | -0.87 | CACCAAGAGCTGGTGACAAA   | NM_032029:           | NM_032029:                                      |
| 2219   | FCN1   | ficolin (collagen/fibrinogen domain containing) 1                      | 0.98  | AGGGAGAATATGTTTCTAAA   | NM_002003:           | NM_002003:                                      |
| 2219   | FCN1   | ficolin (collagen/fibrinogen domain containing) 1                      | -3.23 | CTGTCATGCTTCAACCTCAA   | NM_002003:           | NM_002003:                                      |
| 2220   | FCN2   | ficolin (collagen/fibrinogen domain containing lectin) 2 (hucolin)     | 0.02  | CTGCCATGTGTCAAACTGAA   | NM_004108:           | NM_004108.NM_015837:                            |
| 2220   | FCN2   | ficolin (collagen/fibrinogen domain containing lectin) 2 (hucolin)     | -6.71 | ATGGATACAATATAGTACA    | NM_004108:           | NM_004108.NM_015837:                            |
| 8547   | FCN3   | ficolin (collagen/fibrinogen domain containing) 3 (Hakata antigen)     | -0.30 | CTGCTTGCCTGCCAATTTA    | NM_003665:           | NM_173452.NM_003665:                            |
| 8547   | FCN3   | ficolin (collagen/fibrinogen domain containing) 3 (Hakata antigen)     | -0.05 | ATGCATCTGTTACCGATCAA   | NM_003665:           | NM_173452.NM_003665:                            |
| 79368  | FCRL2  | Fc receptor-like 2                                                     | 1.24  | TCGAAGATGGCTTACCATA    | NM_030764:           | NM_030764:                                      |
| 79368  | FCRL2  | Fc receptor-like 2                                                     | -4.73 | TTCAATATAGTAAAGATA     | NM_030764:           | NM_030764:                                      |
| 343413 | FCRL6  | Fc receptor-like 6                                                     | -0.44 | CAGAGAGAGGAGTGAGCCCAA  | NM_001004310:        | NM_001004310:                                   |
| 343413 | FCRL6  | Fc receptor-like 6                                                     | 2.12  | CAGACATTACACAAACTTCA   | NM_001004310:        | NM_001004310:                                   |
| 2222   | FDFT1  | farnesyl-diphosphate farnesyltransferase 1                             | 0.39  | TCCTACTACTTTAATCCCTAA  | NM_004462:           | NM_004462:                                      |
| 2222   | FDFT1  | farnesyl-diphosphate farnesyltransferase 1                             | 1.75  | TTGAATGTTGTAATAGTAGA   | NM_004462:           | NM_004462:                                      |
| 2232   | FDXR   | ferredoxin reductase                                                   | -5.18 | AAGCGTGCCCTTTGACTCCAA  | NM_024417.NM_004110: | NM_024417.NM_004110:                            |
| 2232   | FDXR   | ferredoxin reductase                                                   | -1.63 | TGGGAACATGCTGGAATAAA   | NM_004110:           | NM_024417.NM_004110:                            |
| 2235   | FECH   | ferrochelatase (protoporphyrin)                                        | 0.37  | CCCAAGGGTAATAAACCTGTA  | NM_000140:           | NM_000140.NM_001012515:                         |
| 2235   | FECH   | ferrochelatase (protoporphyrin)                                        | -0.31 | CCGACTGGTGGGAATCCCAA   | NM_000140:           | NM_000140.NM_001012515:                         |
| 55527  | FEM1A  | fem-1 homolog a (C.elegans)                                            | -0.77 | TGGGATAAATCCACTAGCTAA  | NM_018708:           | NM_018708:                                      |
| 55527  | FEM1A  | fem-1 homolog a (C.elegans)                                            | -0.39 | AAGGATTGAGACCAAGTCAAT  | NM_018708:           | NM_018708:                                      |
| 10116  | FEM1B  | fem-1 homolog b (C.elegans)                                            | -0.90 | CAGCCCGCAATGGACACGCCAA | NM_015322:           | NM_015322:                                      |
| 10116  | FEM1B  | fem-1 homolog b (C.elegans)                                            | 0.47  | CTGGATATGTAAGTCTGTTTA  | NM_015322:           | NM_015322:                                      |
| 2237   | FEN1   | flap structure-specific endonuclease 1                                 | 0.02  | CAAGAGTACTTGGCCGTTAA   | NM_004111:           | NM_004111:                                      |
| 2237   | FEN1   | flap structure-specific endonuclease 1                                 | 2.26  | TAAGTCCATTGTTACATGAAA  | NM_004111:           | NM_004111:                                      |
| 2241   | FER    | fer (fps/fes related) tyrosine kinase (phosphoprotein NCP94)           | -3.57 | CAGAACAACCTAGTAGGATA   | NM_005246:           | NM_005246:                                      |
| 2241   | FER    | fer (fps/fes related) tyrosine kinase (phosphoprotein NCP94)           | -6.05 | CAGATAGATCCTAGTACAGAA  | NM_005246:           | NM_005246:                                      |
| 2242   | FES    | feline sarcoma oncogene                                                | -1.52 | AAGGCCAAGTTCTACAGGAA   | NM_002005:           | NM_002005:                                      |
| 2242   | FES    | feline sarcoma oncogene                                                | -0.39 | CAGCCTGAGGCTGAGTACCAA  | NM_002005:           | NM_002005:                                      |
| 54738  | FEV    | FEV (ETS oncogene family)                                              | 1.42  | AGGCGGCAAGCGTTAATTTAA  | NM_017521:           | NM_017521:                                      |
| 54738  | FEV    | FEV (ETS oncogene family)                                              | -0.07 | TTCAATCACTACTCTTTAA    | NM_017521:           | NM_017521:                                      |
| 2864   | FFAR1  | free fatty acid receptor 1                                             | -0.67 | TAGCCTGGTCTACGCCCTGAA  | NM_005303:           | NM_005303:                                      |
| 2864   | FFAR1  | free fatty acid receptor 1                                             | 1.41  | TGCCCTGGAGTGGTGGCTTAA  | NM_005303:           | NM_005303:                                      |
| 2867   | FFAR2  | free fatty acid receptor 2                                             | -1.56 | ACCATCGTATCATCGTTCAA   | NM_005306:           | NM_005306:                                      |
| 2867   | FFAR2  | free fatty acid receptor 2                                             | -6.80 | CTACGAGAATTCACCCGATA   | NM_005306:           | NM_005306:                                      |
| 2865   | FFAR3  | free fatty acid receptor 3                                             | 0.74  | CAGAAAGTCCCATTTGCTCAA  | NM_005304:           | NM_005304:                                      |
| 2865   | FFAR3  | free fatty acid receptor 3                                             | 0.05  | GTGGATCATCAGAGACATTTA  | NM_005304:           | NM_005304:                                      |
| 2243   | FGA    | fibrinogen alpha chain                                                 | 0.50  | ACGCGTCTGTCATGCTCTAAA  | NM_000508:           | NM_021871.NM_000508:                            |
| 2243   | FGA    | fibrinogen alpha chain                                                 | -0.37 | AGGGCTTTAGCTCGTGAAGTA  | NM_000508:           | NM_021871.NM_000508:                            |
| 2244   | FGB    | fibrinogen beta chain                                                  | -0.21 | CAGCACGTATGACACAGACAAA | NM_005141:           | NM_005141:                                      |
| 2244   | FGB    | fibrinogen beta chain                                                  | -0.58 | CAGGAAATGGGATCCATATA   | NM_005141:           | NM_005141:                                      |
| 2246   | FGF1   | fibroblast growth factor 1 (acidic)                                    | -0.91 | CTGATACTTATTACCTATA    | NM_000800:           | NM_033137.NM_033136.NM_000800:                  |
| 2246   | FGF1   | fibroblast growth factor 1 (acidic)                                    | 1.35  | GAGAATGATAGTAAATGGATA  | NM_000800:           | NM_033137.NM_033136.NM_000800:                  |
| 2255   | FGF10  | fibroblast growth factor 10                                            | -0.77 | TCCAATGGTGGTACACTATA   | NM_004465:           | NM_004465:                                      |
| 2255   | FGF10  | fibroblast growth factor 10                                            | -2.75 | CAACTATTACTTACCCATGAA  | NM_004465:           | NM_004465:                                      |
| 9965   | FGF19  | fibroblast growth factor 19                                            | -1.86 | CCGTAAGGCGCTACTATATA   | NM_005117:           | NM_005117:                                      |
| 9965   | FGF19  | fibroblast growth factor 19                                            | 0.06  | CAACATGATATTTATGAGTAA  | NM_005117:           | NM_005117:                                      |
| 2247   | FGF2   | fibroblast growth factor 2 (basic)                                     | 1.15  | AACAATATTAGTGTATCCAA   | NM_002006:           | NM_002006:                                      |
| 2247   | FGF2   | fibroblast growth factor 2 (basic)                                     | 0.03  | ATGCTAAACTTTACTGATGTA  | NM_002006:           | NM_002006:                                      |
| 8074   | FGF23  | fibroblast growth factor 23                                            | 0.65  | TCCATTCAATAGGAGACTCAA  | NM_020638:           | NM_020638:                                      |
| 8074   | FGF23  | fibroblast growth factor 23                                            | -1.92 | CTCTCTTTAAATGACACCTAA  | NM_020638:           | NM_020638:                                      |
| 2248   | FGF3   | fibroblast growth factor 3 (murine mammary tumor virus integration sit | -1.35 | TTGCTCCTGGGTGAAATTTAA  | NM_005247:           | NM_005247:                                      |

|        |                |                                                                           |       |                        |            |                                                                                                                                                |
|--------|----------------|---------------------------------------------------------------------------|-------|------------------------|------------|------------------------------------------------------------------------------------------------------------------------------------------------|
| 2248   | FGF3           | fibroblast growth factor 3 (murine mammary tumor virus integration sit    | 1.08  | TTGTGTCATCACAACTTAAA   | NM_005247: | NM_005247:                                                                                                                                     |
| 2249   | FGF4           | fibroblast growth factor 4 (heparin secretory transforming protein 1, Ke  | 0.89  | ATGTGTATATATTGCCACCAA  | NM_002007: | NM_002007:                                                                                                                                     |
| 2249   | FGF4           | fibroblast growth factor 4 (heparin secretory transforming protein 1, Ke  | -0.66 | CACCGATGAGTGCAGTTCAC   | NM_002007: | NM_002007:                                                                                                                                     |
| 2250   | FGF5           | fibroblast growth factor 5                                                | 0.97  | ACACATATATAAACAATAA    | NM_004464: | NM_033143:NM_004464:                                                                                                                           |
| 2250   | FGF5           | fibroblast growth factor 5                                                | 0.99  | TTGAACATAATTATACCTTAA  | NM_004464: | NM_033143:NM_004464:                                                                                                                           |
| 2251   | FGF6           | fibroblast growth factor 6                                                | 0.09  | AAGCATCATCTGTTCGATTGA  | NM_020996: | NM_020996:                                                                                                                                     |
| 2251   | FGF6           | fibroblast growth factor 6                                                | 0.42  | TTGCTTGCCATGAACAGTAAA  | NM_020996: | NM_020996:                                                                                                                                     |
| 2252   | FGF7           | fibroblast growth factor 7 (keratinocyte growth factor)                   | -0.26 | CACCGGAGCACTACACTATA   | NM_002009: | NM_002009:                                                                                                                                     |
| 2252   | FGF7           | fibroblast growth factor 7 (keratinocyte growth factor)                   | -1.63 | TAGTTTGTAGCTACAGTAGAA  | NM_002009: | NM_002009:                                                                                                                                     |
| 2253   | FGF8           | fibroblast growth factor 8 (androgen-induced)                             | -2.44 | CTACATCTGCATGAACAAGAA  | NM_006119: | NM_033164:NM_033165:NM_033163:NM_006119:                                                                                                       |
| 2253   | FGF8           | fibroblast growth factor 8 (androgen-induced)                             | -5.78 | CAAGAGCAACGGCAAGGCGAA  | NM_006119: | NM_033164:NM_033165:NM_033163:NM_006119:                                                                                                       |
| 2254   | FGF9           | fibroblast growth factor 9 (glia-activating factor)                       | -0.63 | ATCGCAGTGAACCTAAAGCAA  | NM_002010: | NM_002010:                                                                                                                                     |
| 2254   | FGF9           | fibroblast growth factor 9 (glia-activating factor)                       | 0.81  | GCGATACTATGTTGCATTAAA  | NM_002010: | NM_002010:                                                                                                                                     |
| 2260   | FGFR1          | fibroblast growth factor receptor 1 (fms-related tyrosine kinase 2, Pfeif | -2.88 | AACAGATAACACCAAAACCAA  | NM_000604: | NM_015850:NM_023111:NM_023110:NM_023109:<br>NM_023105:NM_023108:NM_023107:NM_023106:<br>NM_000604:                                             |
| 2260   | FGFR1          | fibroblast growth factor receptor 1 (fms-related tyrosine kinase 2, Pfeif | -0.38 | CAGAGATTACCATCGGGGTA   | NM_000604: | NM_015850:NM_023111:NM_023109:NM_023105:<br>NM_023106:NM_000604:                                                                               |
| 11116  | FGFR1OP        | FGFR1 oncogene partner                                                    | 1.30  | AAGTATATTAGTATAAGTTAA  | NM_007045: | NM_007045:NM_194429:                                                                                                                           |
| 11116  | FGFR1OP        | FGFR1 oncogene partner                                                    | 0.32  | CCAGATGAAGATGATATGGAA  | NM_007045: | NM_007045:NM_194429:                                                                                                                           |
| 26127  | FGFR1OP2       | FGFR1 oncogene partner 2                                                  | 1.19  | ACGGAGGATTTGTACGCTAAA  | NM_015633: | NM_015633:                                                                                                                                     |
| 26127  | FGFR1OP2       | FGFR1 oncogene partner 2                                                  | 1.27  | TAGACATATTATGATAGTTAA  | NM_015633: | NM_015633:                                                                                                                                     |
| 2263   | FGFR2          | fibroblast growth factor receptor 2 (bacteria-expressed kinase, keratini  | -2.92 | CGAATGAAGAACACGACCAA   | NM_000141: | NM_023031:NM_023029:NM_023030:NM_023028:<br>NM_022973:NM_022974:NM_000141:NM_022972:<br>NM_022975:NM_022969:                                   |
| 2263   | FGFR2          | fibroblast growth factor receptor 2 (bacteria-expressed kinase, keratini  | -4.15 | CGGAGGAGCGTTGCCATTCAA  | NM_000141: | NM_023031:NM_023029:NM_023030:NM_022976:<br>NM_023028:NM_022973:NM_022974:NM_000141:<br>NM_022972:NM_022975:NM_022971:NM_022969:<br>NM_022970: |
| 2261   | FGFR3          | fibroblast growth factor receptor 3 (achondroplasia, thanatophoric dwe    | -0.53 | ACCCTACGTTACCGTGTCCAA  | NM_000142: | NM_000142:NM_022965:                                                                                                                           |
| 2261   | FGFR3          | fibroblast growth factor receptor 3 (achondroplasia, thanatophoric dwe    | 0.14  | CAGGAGAATTAGATTCTTATA  | NM_000142: | NM_000142:NM_022965:                                                                                                                           |
| 2264   | FGFR4          | fibroblast growth factor receptor 4                                       | -1.20 | CACATTGCTACTATAAGAAA   | NM_002011: | NM_213647:NM_022963:NM_002011:                                                                                                                 |
| 2264   | FGFR4          | fibroblast growth factor receptor 4                                       | 1.99  | CAGGCTCTCCGCGCAAGTCAA  | NM_002011: | NM_213647:NM_022963:NM_002011:                                                                                                                 |
| 53834  | FGFR1L         | fibroblast growth factor receptor-like 1                                  | -2.14 | CACCGTGTCCGAGACCCAAA   | NM_021923: | NM_021923:NM_01004356:NM_01004358:                                                                                                             |
| 53834  | FGFR1L         | fibroblast growth factor receptor-like 1                                  | 1.15  | CTTGGATTTTATTTAAGAAA   | NM_021923: | NM_021923:NM_01004356:NM_01004358:                                                                                                             |
| 2266   | FGG (fibrinog  | fibrinogen gamma chain                                                    | -0.25 | CCGGTGGTATCCATGAAGAA   | NM_000509: | NM_000509:NM_021870:                                                                                                                           |
| 2266   | FGG (fibrinog  | fibrinogen gamma chain                                                    | -0.35 | CCCGTGGTATCCATGAAGAA   | NM_000509: | NM_000509:NM_021870:                                                                                                                           |
| 2267   | FGL1           | fibrinogen-like 1                                                         | 0.62  | TAGCCGTTATGCACAATATA   | NM_004467: | NM_201553:NM_147203:NM_004467:NM_201552:                                                                                                       |
| 2267   | FGL1           | fibrinogen-like 1                                                         | 1.12  | ATAGCCGTTATGCACAATATA  | NM_004467: | NM_201553:NM_147203:NM_004467:NM_201552:                                                                                                       |
| 10875  | FGL2           | fibrinogen-like 2                                                         | -0.16 | CCAGGTATTCGTTATCTAATA  | NM_006682: | NM_006682:                                                                                                                                     |
| 10875  | FGL2           | fibrinogen-like 2                                                         | 1.42  | ATGGCAAAATATTACACCAA   | NM_006682: | NM_006682:                                                                                                                                     |
| 2268   | FGR            | Gardner-Rasheed feline sarcoma viral (v-fgr) oncogene homolog             | 1.25  | CACGTGGAACGGCAGCACTAA  | NM_005248: | NM_005248:                                                                                                                                     |
| 2268   | FGR            | Gardner-Rasheed feline sarcoma viral (v-fgr) oncogene homolog             | -0.14 | CAGACCTGTCTAGTTATTTA   | NM_005248: | NM_005248:                                                                                                                                     |
| 2271   | FH             | fumarate hydratase                                                        | 0.65  | TAGGATGTGCTAGTCTAAGA   | NM_000143: | NM_000143:                                                                                                                                     |
| 2271   | FH             | fumarate hydratase                                                        | -0.48 | CAGGAATTTAGTGGTTATGTT  | NM_000143: | NM_000143:                                                                                                                                     |
| 2274   | FHL2           | four and a half LIM domains 2                                             | 0.48  | ATCGAGTAAGGCACACCCAAA  | NM_001450: | NM_001450:NM_201555:NM_201556:NM_201557:                                                                                                       |
| 2274   | FHL2           | four and a half LIM domains 2                                             | -2.62 | CTCCCGTTGCGTCAAGTCTAA  | NM_001450: | NM_001450:NM_201555:NM_201556:NM_201557:                                                                                                       |
| 9457   | FHL5           | four and a half LIM domains 5                                             | -0.15 | AACCAATTGAATCTGATTCTA  | NM_020482: | NM_020482:                                                                                                                                     |
| 9457   | FHL5           | four and a half LIM domains 5                                             | 0.12  | ACCAATTGAATCTGATTCTA   | NM_020482: | NM_020482:                                                                                                                                     |
| 84929  | FIBCD1         | fibrinogen C domain containing 1                                          | 0.39  | CCCACTGAAGTTTGTGCTTAA  | NM_032843: | NM_032843:                                                                                                                                     |
| 84929  | FIBCD1         | fibrinogen C domain containing 1                                          | 0.34  | CCGGCCATCCCTGACACGAA   | NM_032843: | NM_032843:                                                                                                                                     |
| 2277   | FIGF           | c-fos induced growth factor (vascular endothelial growth factor D)        | 0.53  | CAGGTGTCAATGACTGATTA   | NM_004469: | NM_004469:                                                                                                                                     |
| 2277   | FIGF           | c-fos induced growth factor (vascular endothelial growth factor D)        | -0.29 | CAGGTTGTAAGTGTGCGCAA   | NM_004469: | NM_004469:                                                                                                                                     |
| 60681  | FKBP10         | FK506 binding protein 10, 65 kDa                                          | 0.15  | GTGGGTGTAGGGCTATGAAA   | NM_021939: | NM_021939:                                                                                                                                     |
| 60681  | FKBP10         | FK506 binding protein 10, 65 kDa                                          | 0.12  | CTGGAGAGAGAGGAGATTA    | NM_021939: | NM_021939:                                                                                                                                     |
| 51303  | FKBP11         | FK506 binding protein 11, 19 kDa                                          | 0.01  | TTGGTATCACCTATACAGAA   | NM_016594: | NM_016594:                                                                                                                                     |
| 51303  | FKBP11         | FK506 binding protein 11, 19 kDa                                          | -0.37 | CCGAGCCAACTACTGGCTAAA  | NM_016594: | NM_016594:                                                                                                                                     |
| 55033  | FKBP14         | FK506 binding protein 14, 22 kDa                                          | 0.06  | GAGGTAGAAGTTATATTTAT   | NM_017946: | NM_017946:                                                                                                                                     |
| 55033  | FKBP14         | FK506 binding protein 14, 22 kDa                                          | 0.01  | AACACGGTTAATACATATA    | NM_017946: | NM_017946:                                                                                                                                     |
| 2280   | FKBP1A         | FK506 binding protein 1A, 12kDa                                           | -3.00 | GAGSACTGAATTACTCTCCAA  | NM_000801: | NM_000801:                                                                                                                                     |
| 2280   | FKBP1A         | FK506 binding protein 1A, 12kDa                                           | 0.83  | TAGGTTAACATTAGAATAGGA  | NM_000801: | NM_000801:                                                                                                                                     |
| 2281   | FKBP1B         | FK506 binding protein 1B, 12.6 kDa                                        | 0.92  | AACAATGTCTCTTTGAGAAA   | NM_004116: | NM_004116:NM_054033:                                                                                                                           |
| 2281   | FKBP1B         | FK506 binding protein 1B, 12.6 kDa                                        | -3.62 | CAGAGGCACTTGGCCAGTTA   | NM_004116: | NM_004116:NM_054033:                                                                                                                           |
| 2286   | FKBP2          | FK506 binding protein 2, 13kDa                                            | 0.06  | CAGGACCCAGACTGTCCCAA   | NM_004470: | NM_004470:NM_057092:                                                                                                                           |
| 2286   | FKBP2          | FK506 binding protein 2, 13kDa                                            | 0.26  | CGGGTTTCGACGCTCCAA     | NM_004470: | NM_004470:                                                                                                                                     |
| 2287   | FKBP3          | FK506 binding protein 3, 25kDa                                            | 1.02  | GTGAAGCTTAATGAAGATAAA  | NM_002013: | NM_002013:                                                                                                                                     |
| 2287   | FKBP3          | FK506 binding protein 3, 25kDa                                            | 0.33  | CACAGCCTTGACGCTCACTAA  | NM_002013: | NM_002013:                                                                                                                                     |
| 2288   | FKBP4          | FK506 binding protein 4, 59kDa                                            | 0.75  | AGCAATAAAGTGGAACAATA   | NM_002014: | NM_002014:                                                                                                                                     |
| 2288   | FKBP4          | FK506 binding protein 4, 59kDa                                            | -0.26 | AGGGATGAGGCTGTGAAGAA   | NM_002014: | NM_002014:                                                                                                                                     |
| 2289   | FKBP5          | FK506 binding protein 5                                                   | -0.82 | ACGGTAAACAGATTGAGCAT   | NM_004117: | NM_004117:                                                                                                                                     |
| 2289   | FKBP5          | FK506 binding protein 5                                                   | -1.62 | TCGGCTGGCAGTCTCCCTAAA  | NM_004117: | NM_004117:                                                                                                                                     |
| 51661  | FKBP7          | FK506 binding protein 7                                                   | -3.75 | CACGATGAACATATAGCATATT | NM_016105: | NM_016105:NM_181342:                                                                                                                           |
| 51661  | FKBP7          | FK506 binding protein 7                                                   | 1.42  | CGGAGCATTGAGACATTTAAA  | NM_016105: | NM_016105:NM_181342:                                                                                                                           |
| 23770  | FKBP8          | FK506 binding protein 8, 38kDa                                            | -0.85 | AATCCATGGAAAGTGGCTGTT  | NM_012181: | NM_012181:                                                                                                                                     |
| 23770  | FKBP8          | FK506 binding protein 8, 38kDa                                            | 0.95  | AAGACAACATCAAGGCTCTCT  | NM_012181: | NM_012181:                                                                                                                                     |
| 11328  | FKBP9          | FK506 binding protein 9, 63 kDa                                           | -0.44 | CTGGTGTGTTGATGTTGATTA  | NM_007270: | NM_007270:                                                                                                                                     |
| 11328  | FKBP9          | FK506 binding protein 9, 63 kDa                                           | -1.91 | TCGAGTCAACATCGCATGAAA  | NM_007270: | NM_007270:                                                                                                                                     |
| 64105  | FKSG14         | leucine zipper protein FKSG14                                             | 0.01  | ATGGAATCTCTTAATGACTA   | NM_022145: | NM_022145:                                                                                                                                     |
| 64105  | FKSG14         | leucine zipper protein FKSG14                                             | 0.35  | CTCAGCTATCATTGTAATTA   | NM_022145: | NM_022145:                                                                                                                                     |
| 59347  | FKSG2          | apoptosis inhibitor                                                       | 1.23  | CACGATAACTACTAGTGTGA   | NM_021631: | NM_021631:                                                                                                                                     |
| 59347  | FKSG2          | apoptosis inhibitor                                                       | -0.27 | TACCGTAAGGATGGTCAGTAT  | NM_021631: | NM_021631:                                                                                                                                     |
| 83954  | FKSG83         | FKSG83                                                                    | 2.08  | ACGTTGTCTTCCACTTATA    | NM_032030: | NM_032030:                                                                                                                                     |
| 83954  | FKSG83         | FKSG83                                                                    | -3.14 | AAGACTGTTTATACTACCA    | NM_032030: | NM_032030:                                                                                                                                     |
| 201163 | FLCN           | folliculin                                                                | -0.58 | CGGGATATATACAGCCATGAT  | NM_144606: | NM_144997:NM_144606:                                                                                                                           |
| 201163 | FLCN           | folliculin                                                                | 1.74  | CAGGCTGTTGCACTGCCAA    | NM_144606: | NM_144997:NM_144606:                                                                                                                           |
| 2312   | FLG (filaggrin | filaggrin                                                                 | -0.04 | CACGTAATGAGGAAACATCAA  | XM_048104: | NM_002016:                                                                                                                                     |
| 2312   | FLG (filaggrin | filaggrin                                                                 | -1.03 | CACAGTCAATCATGATAAAGAT | XM_048104: | NM_002016:                                                                                                                                     |
| 55277  | FLJ10986       | hypothetical protein FLJ10986                                             | -0.14 | CAGCAGGGCACTCAATCAGTA  | NM_018291: | NM_018291:                                                                                                                                     |
| 55277  | FLJ10986       | hypothetical protein FLJ10986                                             | -0.88 | CCCGACTTCTTATCGTGGAA   | NM_018291: | NM_018291:                                                                                                                                     |
| 79587  | FLJ12118       | hypothetical protein FLJ12118                                             | 0.16  | CTCGTGGGAACGCTTATTCAA  | NM_024537: | NM_024537:                                                                                                                                     |
| 79587  | FLJ12118       | hypothetical protein FLJ12118                                             | 0.09  | CTCGCCAGTCTTTATGAGGAA  | NM_024537: | NM_024537:                                                                                                                                     |
| 79807  | FLJ13273       | hypothetical protein FLJ13273                                             | 0.47  | GAGGTTTATAGGTTAAGTAA   | NM_024751: | NM_024751:                                                                                                                                     |
| 79807  | FLJ13273       | hypothetical protein FLJ13273                                             | -1.01 | AAGACTCAGAATCTTAAGGAA  | NM_024751: | NM_024751:                                                                                                                                     |

|        |                                                  |                                                                         |        |                        |               |                                                                            |
|--------|--------------------------------------------------|-------------------------------------------------------------------------|--------|------------------------|---------------|----------------------------------------------------------------------------|
| 79758  | FLJ13639                                         | hypothetical protein FLJ13639                                           | -0.16  | AACAGCTGGCTCAGACATTTA  | NM_024705:    | NM_024705:                                                                 |
| 79758  | FLJ13639                                         | hypothetical protein FLJ13639                                           | -1.49  | CTCACAGAAGATGGACTTGAA  | NM_024705:    | NM_001031719:NM_024705:                                                    |
| 79828  | FLJ13984                                         | hypothetical protein FLJ13984                                           | -0.76  | CAGGCTATTTCTAGATATACA  | NM_024770:    | NM_024770:                                                                 |
| 79828  | FLJ13984                                         | hypothetical protein FLJ13984                                           | 0.77   | CACACCTTATTTCCAGGGAAA  | NM_024770:    | NM_024770:                                                                 |
| 84954  | FLJ14981                                         | hypothetical protein FLJ14981                                           | 0.14   | TCAGGTAATAAGAAACGGAA   | NM_032868:    | NM_032868:                                                                 |
| 84954  | FLJ14981                                         | hypothetical protein FLJ14981                                           | 0.28   | CCGGATGGCTCAGGTAATAA   | NM_032868:    | NM_032868:                                                                 |
| 339761 | FLJ16008                                         | FLJ16008 protein                                                        | -0.25  | CGGGAGATTGTGAAGAATTTA  | NM_001001665: | NM_001001665:                                                              |
| 339761 | FLJ16008                                         | FLJ16008 protein                                                        | 0.44   | AACCAAGTATTGTGCTGACTTA | NM_001001665: | NM_001001665:                                                              |
| 54962  | FLJ20516                                         | timeless-interacting protein                                            | -3.85  | AAGCTTGGCGTTACTATGTAT  | NM_017858:    | NM_017858:                                                                 |
| 54962  | FLJ20516                                         | timeless-interacting protein                                            | 0.52   | CTGAGTTAAGTAGAAGCGCTAA | NM_017858:    | NM_017858:                                                                 |
| 54980  | FLJ20558                                         | hypothetical protein FLJ20558                                           | -3.09  | CTGCTCTTAGCTAAGATGCAA  | NM_017880:    | NM_017880:                                                                 |
| 54980  | FLJ20558                                         | hypothetical protein FLJ20558                                           | -5.67  | CACCCGTAGCTTTATCCAGAA  | NM_017880:    | NM_017880:                                                                 |
| 55006  | FLJ20628                                         | hypothetical protein FLJ20628                                           | -1.86  | CAGGAGCAACCGAAGACATAA  | NM_017910:    | NM_017910:                                                                 |
| 55006  | FLJ20628                                         | hypothetical protein FLJ20628                                           | 0.01   | GGCGTGATTCATGGAAATTTA  | NM_017910:    | NM_017910:                                                                 |
| 55011  | FLJ20643                                         | hypothetical protein FLJ20643                                           | -0.82  | ACCGAAGAGAAAGCAATTTA   | NM_017916:    | NM_017916:                                                                 |
| 55011  | FLJ20643                                         | hypothetical protein FLJ20643                                           | -3.04  | CCCGGTGCAGATCAACTCTCA  | NM_017916:    | NM_017916:                                                                 |
| 79984  | FLJ21736                                         | esterase 31                                                             | -1.88  | CGGGTATTGTCCAGAGAGAAA  | NM_024922:    | NM_024922:                                                                 |
| 79984  | FLJ21736                                         | esterase 31                                                             | -0.66  | ACCGTCATAGTGAATACCTA   | NM_024922:    | NM_024922:                                                                 |
| 60526  | FLJ21820                                         | hypothetical protein FLJ21820                                           | 0.09   | GAGATACTACTGATACTAAA   | NM_021925:    | NM_021925:                                                                 |
| 60526  | FLJ21820                                         | hypothetical protein FLJ21820                                           | -1.60  | CTGCACTAGACAGAGAATAAA  | NM_021925:    | NM_021925:                                                                 |
| 79912  | FLJ22028                                         | hypothetical protein FLJ22028                                           | 0.17   | AAGAAATATGATCATAGGGAA  | NM_024854:    | NM_024854:                                                                 |
| 79912  | FLJ22028                                         | hypothetical protein FLJ22028                                           | 1.48   | TAGCAATATCTCGTTTGTCTAA | NM_024854:    | NM_024854:                                                                 |
| 64224  | FLJ22313                                         | hypothetical protein FLJ22313                                           | -0.57  | CAGCCATAAAGCAATAAACTT  | NM_022373:    | NM_022373:                                                                 |
| 64224  | FLJ22313                                         | hypothetical protein FLJ22313                                           | 0.61   | AAGCAGCAATGGACTACTAAA  | NM_022373:    | NM_022373:                                                                 |
| 79866  | FLJ22624                                         | FLJ22624 protein                                                        | -3.75  | CGGTTGATATGGCGAATTTA   | NM_024808:    | NM_024808:                                                                 |
| 79866  | FLJ22624                                         | FLJ22624 protein                                                        | 0.77   | TACCAACTCCAGGGAAATTTA  | NM_024808:    | NM_024808:                                                                 |
| 84197  | FLJ23356                                         | hypothetical protein FLJ23356                                           | 1.52   | AAGGCTTGGATACACTTAGA   | NM_032237:    | NM_032237:                                                                 |
| 84197  | FLJ23356                                         | hypothetical protein FLJ23356                                           | -3.35  | CACGATGATCTCATGCCCTCA  | NM_032237:    | NM_032237:                                                                 |
| 64800  | FLJ23588                                         | CAP-binding protein complex interacting protein 1                       | 0.05   | CACCGGTAGAGTATATTCAA   | NM_022785:    | NM_022785:                                                                 |
| 64800  | FLJ23588                                         | CAP-binding protein complex interacting protein 1                       | -4.10  | CAGGCGCTGTTCAAGGCTAA   | NM_022785:    | NM_022785:NM_198856:                                                       |
| 124923 | FLJ25006                                         | hypothetical protein FLJ25006                                           | -0.88  | GAGGTTAAAGCTGATGGGATA  | NM_144610:    | NM_144610:                                                                 |
| 124923 | FLJ25006                                         | hypothetical protein FLJ25006                                           | 0.05   | TACATGGGTGAGAGAGGTTAA  | NM_144610:    | NM_144610:                                                                 |
| 151516 | FLJ25084                                         | Skin ASpartic Protease                                                  | -0.49  | CAAGCTGCTGTTGATGACAAA  | NM_152792:    | NM_152792:                                                                 |
| 151516 | FLJ25084                                         | Skin ASpartic Protease                                                  | -0.03  | CAGGAGGTATGCCACTGAGAA  | NM_152792:    | NM_152792:                                                                 |
| 220296 | FLJ25530                                         | hepatocyte cell adhesion molecule                                       | -6.54  | ATGGATGGGCTTATTTTATA   | NM_152722:    | NM_152722:                                                                 |
| 220296 | FLJ25530                                         | hepatocyte cell adhesion molecule                                       | 0.83   | CACATAAACAAAGGTAACAAA  | NM_152722:    | NM_152722:                                                                 |
| 254048 | FLJ25778                                         | hypothetical protein FLJ25778                                           | 0.48   | TAGGATCACATACGACATA    | XM_376679:    | XM_376679:XM_379933:                                                       |
| 254048 | FLJ25778                                         | hypothetical protein FLJ25778                                           | -0.97  | CACAGAGACTTGTGACTCATA  | XM_376679:    | XM_376679:XM_379933:                                                       |
| 205860 | FLJ25801                                         | hypothetical protein FLJ25801                                           | -1.05  | CGGGCAGATATCATTCTACAA  | NM_173553:    | NM_173553:                                                                 |
| 205860 | FLJ25801                                         | hypothetical protein FLJ25801                                           | -2.30  | CAGCATGTTGAGACTATCCCA  | NM_173553:    | NM_173553:                                                                 |
| 153830 | FLJ31951                                         | hypothetical protein FLJ31951                                           | 2.00   | CTGTATGATCACACTCTGCAA  | NM_144726:    | NM_144726:                                                                 |
| 153830 | FLJ31951                                         | hypothetical protein FLJ31951                                           | 1.26   | CTGATACGTGTGAGAGAGAAA  | NM_144726:    | NM_144726:                                                                 |
| 147664 | FLJ32214                                         | hypothetical protein FLJ32214                                           | -0.14  | CACGACGCTCTTATGCCAAA   | NM_152473:    | NM_152473:                                                                 |
| 147664 | FLJ32214                                         | hypothetical protein FLJ32214                                           | -0.87  | AACGATTATCGAGACAAGTCA  | NM_152473:    | NM_152473:                                                                 |
| 93233  | FLJ32926                                         | hypothetical protein FLJ32926                                           | -0.03  | TACGAGGACGCCCTGAATAAA  | NM_144577:    | NM_144577:                                                                 |
| 93233  | FLJ32926                                         | hypothetical protein FLJ32926                                           | 0.68   | AAATGGGACTGTGGAATAAAA  | NM_144577:    | NM_144577:                                                                 |
| 284131 | FLJ35220                                         | hypothetical protein FLJ35220                                           | -0.03  | AAGAGAGAGATTGGTGTAAAT  | NM_173627:    | NM_173627:                                                                 |
| 284131 | FLJ35220                                         | hypothetical protein FLJ35220                                           | 0.26   | ATGGGTGAGAGTTGAAATGAA  | NM_173627:    | NM_173627:                                                                 |
| 339976 | FLJ36180                                         | hypothetical protein FLJ36180                                           | -0.46  | CACAACATTAAGACGATGAA   | NM_178556:    | NM_178556:                                                                 |
| 339976 | FLJ36180                                         | hypothetical protein FLJ36180                                           | 0.02   | CGGGCGGATGCTGTGAGACCAA | NM_178556:    | NM_178556:                                                                 |
| 129804 | FLJ37440                                         | hypothetical protein FLJ37440                                           | 0.73   | TAACCTGGTAATAAAGTCAA   | NM_153214:    | NM_153214:                                                                 |
| 129804 | FLJ37440                                         | hypothetical protein FLJ37440                                           | -1.31  | CACGTGAGAGTATCAAGTCAA  | NM_153214:    | NM_153214:                                                                 |
| 283848 | FLJ37464                                         | hypothetical protein FLJ37464                                           | 0.03   | CAGGTTGTGACATGGAGCAA   | NM_173815:    | NM_173815:                                                                 |
| 283848 | FLJ37464                                         | hypothetical protein FLJ37464                                           | 1.03   | AAGAGTGGGCGATGAAGCTCAA | NM_173815:    | NM_173815:                                                                 |
| 166979 | FLJ37927                                         | CDC20-like protein                                                      | 1.21   | AAGGAGATTGCAACTGGTCAA  | NM_152623:    | NM_152623:                                                                 |
| 166979 | FLJ37927                                         | CDC20-like protein                                                      | 0.15   | CAGGACAACCTATTACCAA    | NM_152623:    | NM_152623:                                                                 |
| 126410 | FLJ39501                                         | cytochrome P450, family 2, subfamily E, polypeptide 2 homolog           | -0.62  | CAAGAGAAGTAGAGTATTAT   | NM_173483:    | NM_173483:                                                                 |
| 126410 | FLJ39501                                         | cytochrome P450, family 2, subfamily E, polypeptide 2 homolog           | -2.11  | CTGGACAACATGCGACCATGTA | NM_173483:    | NM_173483:                                                                 |
| 401258 | FLJ43093                                         | FLJ43093 protein                                                        | -0.18  | TTCAACAATAACAGTATTCAA  | NM_207498:    | NM_207498:                                                                 |
| 401258 | FLJ43093                                         | FLJ43093 protein                                                        | -3.31  | CACAATTTGAATATACAACAT  | NM_207498:    | NM_207498:                                                                 |
| 386757 | FLJ43855                                         | similar to sodium- and chloride-dependent creatine transporter          | 0.01   | TCACCTGAACAAGAAAGACAA  | NM_198857:    | NM_198857:                                                                 |
| 386757 | FLJ43855                                         | similar to sodium- and chloride-dependent creatine transporter          | -1.46  | CTGGACAGCATCATTTACTAT  | NM_198857:    | NM_198857:                                                                 |
| 346689 | FLJ44186                                         | FLJ44186 protein                                                        | 0.05   | CACGCGATGAGGAATCTAGA   | NM_198508:    | NM_198508:                                                                 |
| 346689 | FLJ44186                                         | FLJ44186 protein                                                        | 1.07   | TGCGTTATCTGTTGCTTTATA  | NM_198508:    | NM_198508:                                                                 |
| 400535 | FLJ44674                                         | FLJ44674 protein                                                        | 0.52   | CAGGTGGATGTCAGACATCCAA | NM_032032:    | NM_207449:XM_291770:                                                       |
| 202018 | FLJ90013                                         | hypothetical protein FLJ90013                                           | -0.08  | TCCGCTTGAATTTCTGTGTTA  | NM_153365:    | NM_153365:                                                                 |
| 202018 | FLJ90013                                         | hypothetical protein FLJ90013                                           | -2.93  | CAGTGTAACTTTAAGGTATA   | NM_153365:    | NM_153365:                                                                 |
| 2319   | FLOT2                                            | flotillin 2                                                             | 0.76   | CATGCACATCATGTAGATTTA  | NM_004475:    | NM_004475:                                                                 |
| 2319   | FLOT2                                            | flotillin 2                                                             | 0.31   | CTGCCTGCTCCCTCTGTGTTAA | NM_004475:    | NM_004475:                                                                 |
| 23769  | FLRT1                                            | fibronectin leucine rich transmembrane protein 1                        | 0.09   | TAGAATTGTGAAAGTGTTTAAA | NM_013280:    | NM_013280:                                                                 |
| 23769  | FLRT1                                            | fibronectin leucine rich transmembrane protein 1                        | 0.07   | AACAATCATGTAGTCGATTTAA | NM_013280:    | NM_013280:                                                                 |
| 23768  | FLRT2                                            | fibronectin leucine rich transmembrane protein 2                        | -0.26  | CGGCGCTGACAGAAATCAAGAA | NM_013231:    | NM_013231:                                                                 |
| 23768  | FLRT2                                            | fibronectin leucine rich transmembrane protein 2                        | 0.41   | ACGCAGATTACATTTGATAAAA | NM_013231:    | NM_013231:                                                                 |
| 23767  | FLRT3                                            | (fibronectin leucine rich transmembrane protein 3                       | 0.55   | CCAGTGGTATTCAATAAATCA  | NM_013281:    | NM_013281:NM_198391:                                                       |
| 23767  | FLRT3                                            | (fibronectin leucine rich transmembrane protein 3                       | 0.61   | ATGCTGAAACACAATTCCTATA | NM_013281:    | NM_013281:NM_198391:                                                       |
| 2321   | FLT1                                             | fms-related tyrosine kinase 1 (vascular endothelial growth factor/vascu | -10.13 | ACCGCATATGGTATCCCTCAA  | NM_002019:    | NM_002019:                                                                 |
| 2321   | FLT1                                             | fms-related tyrosine kinase 1 (vascular endothelial growth factor/vascu | 0.84   | CACCTACAGTATTAGCAAGCAA | NM_002019:    | NM_002019:                                                                 |
| 2322   | FLT3                                             | fms-related tyrosine kinase 3                                           | -0.33  | CGGCTTGTAGTGAATTTGTGA  | NM_004119:    | NM_004119:                                                                 |
| 2322   | FLT3                                             | fms-related tyrosine kinase 3                                           | 0.39   | TACGTTGATTTCCAGAGAAAT  | NM_004119:    | NM_004119:                                                                 |
| 2323   | FLT3LG (fms-fms-related tyrosine kinase 3 ligand |                                                                         | -0.22  | CTCCTCCGACTCGCTGCTCAA  | BF688722:     | NM_001459:                                                                 |
| 2323   | FLT3LG (fms-fms-related tyrosine kinase 3 ligand |                                                                         | -0.36  | CGCGTGAACACCGAGATACA   | BF688722:     | NM_001459:                                                                 |
| 2324   | FLT4                                             | fms-related tyrosine kinase 4                                           | 0.45   | CACCGTGGGCTGAGTTTAA    | NM_002020:    | NM_002020:NM_182925:                                                       |
| 2324   | FLT4                                             | fms-related tyrosine kinase 4                                           | -2.32  | CACGCTCTTGGTCAACAGGAA  | NM_002020:    | NM_002020:NM_182925:                                                       |
| 28982  | FLVCR                                            | teline leukemia virus subgroup C cellular receptor                      | 0.30   | CTCAACGTTATTAATAACAAT  | NM_014053:    | NM_014053:                                                                 |
| 28982  | FLVCR                                            | teline leukemia virus subgroup C cellular receptor                      | -1.09  | AACGGTTATGTTGCCAAGCA   | NM_014053:    | NM_014053:                                                                 |
| 2326   | FMO1 (flavin                                     | flavin containing monoxygenase 1                                        | 0.21   | CCGAACATTCAGGTCATCAA   | NM_002021:    | NM_002021:                                                                 |
| 2326   | FMO1 (flavin                                     | flavin containing monoxygenase 1                                        | 0.04   | AGGCCTCACTGACAAAGTATA  | NM_002021:    | NM_002021:                                                                 |
| 2328   | FMO3                                             | flavin containing monoxygenase 3                                        | 1.46   | AACATGTTCTTATATCTAA    | NM_006894:    | NM_001002294:NM_006894:                                                    |
| 2328   | FMO3                                             | flavin containing monoxygenase 3                                        | 2.66   | AAGAATCATGTCAATGCTTTA  | NM_006894:    | NM_006894:                                                                 |
| 2329   | FMO4                                             | flavin containing monoxygenase 4                                        | -3.24  | CACGATGGGTCACAAGAGTAT  | NM_002022:    | NM_002022:                                                                 |
| 2329   | FMO4                                             | flavin containing monoxygenase 4                                        | 0.40   | ATCGGCTTATCGGCTTTAAA   | NM_002022:    | NM_002022:                                                                 |
| 2330   | FMO5 (flavin                                     | flavin containing monoxygenase 5                                        | -0.46  | CTGGCCACTCAGGATTTTAA   | NM_001461:    | NM_001461:                                                                 |
| 2330   | FMO5 (flavin                                     | flavin containing monoxygenase 5                                        | -2.64  | AACCAAGTTTACCACATGAA   | NM_001461:    | NM_001461:                                                                 |
| 2331   | FMOD                                             | fibromodulin                                                            | -3.33  | CTGGATTGCTCTCCACGGCAA  | NM_002023:    | NM_002023:                                                                 |
| 2331   | FMOD                                             | fibromodulin                                                            | 0.33   | GTGGCTAACCTGACCAATAAA  | NM_002023:    | NM_002023:                                                                 |
| 2332   | FMR1                                             | fragile X mental retardation 1                                          | -0.72  | CAGGTTAGGCAGATAAAGAA   | NM_002024:    | NM_002024:                                                                 |
| 2332   | FMR1                                             | fragile X mental retardation 1                                          | -0.32  | CTGTCAACACTTAGTACTTTA  | NM_002024:    | NM_002024:                                                                 |
| 2335   | FN1                                              | fibronectin 1                                                           | 0.00   | CCCGTGTGTTATGACAATGGA  | NM_002026:    | NM_002026:NM_212478:NM_212482:NM_054034:<br>NM_212476:NM_212475:NM_212474: |

|        |        |                                                           |       |                        |               |                                                    |
|--------|--------|-----------------------------------------------------------|-------|------------------------|---------------|----------------------------------------------------|
| 2335   | FN1    | fibronectin 1                                             | -1.16 | CGGGTTGTTATGACAAATGGAA | NM_002026:    | NM_002026:NM_212478:NM_212482:NM_054034:           |
| 64122  | FN3K   | (fructosyl fructosamine 3 kinase                          | 0.93  | CCAGCTGTTTAACTACCTGAA  | NM_022158:    | NM_212476:NM_212475:NM_212474:                     |
| 64122  | FN3K   | (fructosyl fructosamine 3 kinase                          | 1.25  | CCAGTGTTCCTGCAAAAGTCAA | NM_022158:    | NM_022158:                                         |
| 79672  | FN3KRP | fructosamine-3-kinase-related protein                     | -1.00 | TAGCTTAAGACCAATGCACTA  | NM_024619:    | NM_024619:                                         |
| 79672  | FN3KRP | fructosamine-3-kinase-related protein                     | 0.21  | CCGACTAGCTTAAAGACCAAT  | NM_024619:    | NM_024619:                                         |
| 64778  | FNDC3B | fibronectin type III domain containing 3B                 | 0.01  | CAAGAGGTTTATTTCAATCTA  | NM_022763:    | NM_022763:                                         |
| 64778  | FNDC3B | fibronectin type III domain containing 3B                 | -1.95 | CAGAGTATTACCACACAGCAA  | NM_022763:    | NM_022763:                                         |
| 152028 | FNDC6  | fibronectin type III domain containing 6                  | 0.54  | CTGGAGAAACAGTGACTATT   | NM_144717:    | NM_144717:                                         |
| 152028 | FNDC6  | fibronectin type III domain containing 6                  | 0.53  | CACGGACAAGGGATGAGAGAA  | NM_144717:    | NM_144717:                                         |
| 2339   | FNTA   | farnesyltransferase, CAAX box, alpha                      | 0.03  | CCCGTGGTCCAGATCATTAT   | NM_002027:    | NM_002027:                                         |
| 2339   | FNTA   | farnesyltransferase, CAAX box, alpha                      | 1.13  | CCGGATGCTATTGAGTTAAA   | NM_002027:    | NM_002027:NM_001018676:                            |
| 2342   | FNTB   | farnesyltransferase, CAAX box, beta                       | 1.65  | CAAGGTTTATACGTTTCAATA  | NM_002028:    | NM_002028:                                         |
| 2342   | FNTB   | farnesyltransferase, CAAX box, beta                       | -3.96 | CACGTCATAGAACAGGCAAA   | NM_002028:    | NM_002028:                                         |
| 2346   | FOLH1  | folate hydrolase (prostate-specific membrane antigen) 1   | -0.20 | ACGAACTGAGACTCTTTAA    | NM_004476:    | NM_001014986:NM_004476:                            |
| 2346   | FOLH1  | folate hydrolase (prostate-specific membrane antigen) 1   | 0.55  | CACGAACTGAGACTCTTTAA   | NM_004476:    | NM_001014986:NM_004476:                            |
| 2348   | FOLR1  | folate receptor 1 (adult)                                 | 0.01  | TAAGGATGTTCTTACCTATA   | NM_000802:    | NM_016724:NM_016725:NM_016729:NM_016730:           |
| 2348   | FOLR1  | folate receptor 1 (adult)                                 | -0.90 | CACATGTGCTTGAGAATTAT   | NM_000802:    | NM_016731:NM_000802:                               |
| 2348   | FOLR1  | folate receptor 1 (adult)                                 | 0.81  | CTCCTACACCTGCAAGAGCAA  | NM_000802:    | NM_016731:NM_000802:                               |
| 2350   | FOLR2  | folate receptor 2 (fetal)                                 | -1.38 | ATGCTTCTATTAGTCACTCAA  | XM_497309:    | XM_497309:NM_016724:NM_016725:NM_016729:NM_016730: |
| 2350   | FOLR2  | folate receptor 2 (fetal)                                 | -1.69 | CTGGACCTCAGGAGTTAACAA  | NM_000803:    | NM_000803:                                         |
| 2352   | FOLR3  | folate receptor 3 (gamma)                                 | 0.49  | ACAACCTATTCTAATAGACAA  | NM_000804:    | NM_000804:                                         |
| 2352   | FOLR3  | folate receptor 3 (gamma)                                 | -1.86 | CTGCAGCACCTTTGAGTCTCA  | NM_000804:    | NM_000804:                                         |
| 2353   | FOS    | v-fos FBJ murine osteosarcoma viral oncogene homolog      | 1.17  | GACCAATATTACTAAGAA     | NM_005252:    | NM_005252:                                         |
| 2353   | FOS    | v-fos FBJ murine osteosarcoma viral oncogene homolog      | 0.73  | TGGGTTTATTGGAATTTAA    | NM_005252:    | NM_005252:                                         |
| 2354   | FOSB   | FBJ murine osteosarcoma viral oncogene homolog B          | 0.61  | AAGGGTGGCGGGGAACGAAA   | NM_006732:    | NM_006732:                                         |
| 2354   | FOSB   | FBJ murine osteosarcoma viral oncogene homolog B          | 0.72  | CGCGGGCAAGAAATAAATA    | NM_006732:    | NM_006732:                                         |
| 8061   | FOSL1  | FOS-like antigen 1                                        | 1.67  | CCCACCTAGAACACTAACTCA  | NM_005438:    | NM_005438:                                         |
| 8061   | FOSL1  | FOS-like antigen 1                                        | -1.09 | CCGAGTAAGCGCGAGCGGAA   | NM_005438:    | NM_005438:                                         |
| 2355   | FOSL2  | FOS-like antigen 2                                        | -0.58 | GCGGATCATGTACAGGATTA   | NM_005253:    | NM_005253:                                         |
| 2355   | FOSL2  | FOS-like antigen 2                                        | -0.04 | TTGGGTTTGCACAGCGCTAA   | NM_005253:    | NM_005253:                                         |
| 2296   | FOXC1  | forkhead box C1                                           | -0.16 | ACGGGAATAGTAGCTGTCAA   | NM_001453:    | NM_001453:                                         |
| 2296   | FOXC1  | forkhead box C1                                           | -3.08 | AACGGGAATAGTAGCTGTCAA  | NM_001453:    | NM_001453:                                         |
| 2303   | FOXC2  | forkhead box C2 (MFH-1, mesenchyme forkhead 1)            | -1.69 | AAGCCCGGCAAGGGCAGTTAC  | NM_005251:    | NM_005251:                                         |
| 2303   | FOXC2  | forkhead box C2 (MFH-1, mesenchyme forkhead 1)            | 0.83  | AACGTGGGGAGATGTTCAAC   | NM_005251:    | NM_005251:                                         |
| 2306   | FOXD2  | forkhead box D2                                           | 0.57  | CCCATTTGGTGTCAATGAATA  | NM_004474:    | NM_004474:                                         |
| 2306   | FOXD2  | forkhead box D2                                           | 0.56  | CACCTGGGTGTCAATGATTTA  | NM_004474:    | NM_004474:                                         |
| 2304   | FOXE1  | forkhead box E1 (thyroid transcription factor 2)          | 1.67  | AACCTAGGCGAGTAATCCTAAA | NM_004473:    | NM_004473:                                         |
| 2304   | FOXE1  | forkhead box E1 (thyroid transcription factor 2)          | -0.12 | CTGCACTATCCTGTTTACGAAA | NM_004473:    | NM_004473:                                         |
| 2290   | FOXP1  | forkhead box P1                                           | 0.86  | CCCGTGTGTTGCTACTACAAA  | NM_005249:    | NM_005249:                                         |
| 2290   | FOXP1  | forkhead box P1                                           | 0.82  | CTAGGGTGTGTTATTCTTA    | NM_005249:    | NM_005249:                                         |
| 3607   | FOXK2  | forkhead box K2                                           | 1.21  | CCGAGCACAAACATCAAGATA  | NM_004514:    | NM_004514:NM_181430:NM_181431:                     |
| 3607   | FOXK2  | forkhead box K2                                           | -1.02 | CTCGGTGACCATCGGCGCGAA  | NM_004514:    | NM_004514:NM_181430:NM_181431:                     |
| 668    | FOXL2  | forkhead box L2                                           | -0.04 | AAAGATGGTTTCGTCTACCAA  | NM_023067:    | NM_023067:                                         |
| 668    | FOXL2  | forkhead box L2                                           | -0.10 | TAGGAGAATATATCCAATAAA  | NM_023067:    | NM_023067:                                         |
| 8456   | FOXN1  | forkhead box N1                                           | 0.16  | CACACAAATTTATCAGATGTA  | NM_003593:    | NM_003593:                                         |
| 8456   | FOXN1  | forkhead box N1                                           | -0.02 | CGGGCTCACCTTAAAGGTCAA  | NM_003593:    | NM_003593:                                         |
| 2308   | FOXO1A | forkhead box O1A (rhabdomyosarcoma)                       | 0.66  | AACCAAGTAGCCTGTTATCAA  | NM_002015:    | NM_002015:                                         |
| 2308   | FOXO1A | forkhead box O1A (rhabdomyosarcoma)                       | -1.22 | CCCGAGTTAGTAAACAGTGCA  | NM_002015:    | NM_002015:                                         |
| 2309   | FOXO3A | forkhead box O3A                                          | -0.46 | CTGAATGATGGGCTGACTGAA  | NM_001455:    | NM_001455:NM_201559:                               |
| 2309   | FOXO3A | forkhead box O3A                                          | 1.90  | CTGGTTAGAACTAGAAATAT   | NM_001455:    | NM_001455:NM_201559:                               |
| 2357   | FPR1   | formyl peptide receptor 1                                 | -2.21 | AACCAAGTAGCCTGTTATCAA  | NM_002029:    | NM_002029:                                         |
| 2357   | FPR1   | formyl peptide receptor 1                                 | 0.53  | CACCCTGAGCCTGGCCAGAAA  | NM_002029:    | NM_002029:                                         |
| 2358   | FPR1   | formyl peptide receptor-like 1                            | -3.36 | CAGGAGTGGTTAGAAATTTCT  | NM_001462:    | NM_001005738:NM_001462:                            |
| 2359   | FPR2   | formyl peptide receptor-like 2                            | -1.85 | CCCAGCTCAACTTCATTTAA   | NM_002030:    | NM_002030:                                         |
| 2359   | FPR2   | formyl peptide receptor-like 2                            | 0.86  | TGGGCTTGGTGGTTTATATA   | NM_002030:    | NM_002030:                                         |
| 27315  | FRAG1  | FGF receptor activating protein 1                         | 0.17  | TGGGTTGAGGTTGGTGTCTA   | NM_014489:    | NM_014489:                                         |
| 27315  | FRAG1  | FGF receptor activating protein 1                         | -0.36 | GAGGTGGTGTCTATACCTAA   | NM_014489:    | NM_014489:                                         |
| 2475   | FRAP1  | FK506 binding protein 12-rapamycin associated protein 1   | -2.85 | CAGGCTTGGTGGGATTTA     | NM_004958:    | NM_004958:                                         |
| 2475   | FRAP1  | FK506 binding protein 12-rapamycin associated protein 1   | -2.18 | CCGGCAACATGCAGCCAAACA  | NM_004958:    | NM_004958:                                         |
| 10023  | FRAT1  | (frequ frequently rearranged in advanced T-cell lymphomas | -1.71 | GAGGAGAACATGAGTAGATAA  | NM_005479:    | NM_005479:NM_181355:                               |
| 10023  | FRAT1  | (frequ frequently rearranged in advanced T-cell lymphomas | 1.00  | GAGGCTGCTTAAATACCAAAA  | NM_005479:    | NM_005479:NM_181355:                               |
| 23401  | FRAT2  | frequently rearranged in advanced T-cell lymphomas 2      | 0.14  | AGGAATCGCGATGGCTTTATA  | NM_012083:    | NM_012083:                                         |
| 23401  | FRAT2  | frequently rearranged in advanced T-cell lymphomas 2      | 0.31  | CCCAACTTTAAGGTAGCTAA   | NM_012083:    | NM_012083:                                         |
| 23413  | FREQ   | freqenin homolog (Drosophila)                             | 0.71  | CGGAATAAACCCAATGGTTAA  | NM_014286:    | NM_014286:                                         |
| 23413  | FREQ   | freqenin homolog (Drosophila)                             | 0.68  | GCGGAATAAACCCAATGGTTA  | NM_014286:    | NM_014286:                                         |
| 2444   | FRK    | fyn-related kinase                                        | 1.01  | CAGGACAGTCAAGGTGATATA  | NM_002031:    | NM_002031:                                         |
| 2444   | FRK    | fyn-related kinase                                        | -0.05 | CTGGAGTACCTAGAACCCCTA  | NM_002031:    | NM_002031:                                         |
| 391059 | FRRS1  | ferric-chelate reductase 1                                | -0.73 | CTGAAGGTTTCATGGTGCTTA  | XM_372784:    | NM_001013660:                                      |
| 391059 | FRRS1  | ferric-chelate reductase 1                                | -0.08 | CAGATTGAAGTTACTTTGTCA  | XM_372784:    | NM_001013660:                                      |
| 10818  | FRS2   | fibroblast growth factor receptor substrate 2             | -0.14 | GACGGTTAAATCAGCAAAACA  | NM_006654:    | NM_006654:                                         |
| 10818  | FRS2   | fibroblast growth factor receptor substrate 2             | 0.16  | CACAGGCAGCTTAATTACATA  | NM_006654:    | NM_006654:                                         |
| 10817  | FRS3   | fibroblast growth factor receptor substrate 3             | -0.64 | CACCAAGTTCAAGGTGACAAA  | NM_006653:    | NM_006653:                                         |
| 10817  | FRS3   | fibroblast growth factor receptor substrate 3             | 0.84  | CCCAAGGCTTCAACTTTTGA   | NM_006653:    | NM_006653:                                         |
| 2487   | FRZB   | frizzled-related protein                                  | 0.98  | CGGGCTAAAGTAAAGAGATA   | NM_001463:    | NM_001463:                                         |
| 2487   | FRZB   | frizzled-related protein                                  | 0.30  | ACGGACACTGTCAACTCTA    | NM_001463:    | NM_001463:                                         |
| 79187  | FSD1   | fibronectin type III and SPRY domain containing 1         | 0.41  | AGGTTCTAAGTTTGACATGAA  | NM_024333:    | NM_024333:                                         |
| 79187  | FSD1   | fibronectin type III and SPRY domain containing 1         | -7.53 | CACGGCCAAGCACGCCAACAA  | NM_024333:    | NM_024333:                                         |
| 405752 | FSD1CL | FSD1 C-terminal like                                      | -1.61 | GAGCTTGTATTACAATTTAA   | NM_207647:    | NM_207647:                                         |
| 405752 | FSD1CL | FSD1 C-terminal like                                      | 0.03  | AACAGTTGCTATATCTTTTA   | NM_207647:    | NM_207647:                                         |
| 123722 | FSD2   | fibronectin type III and SPRY domain containing 2         | 0.01  | CTCAGCATCATATACATTTA   | NM_001007122: | NM_001007122:                                      |
| 123722 | FSD2   | fibronectin type III and SPRY domain containing 2         | -0.05 | AAGAAGATTGGCATTCTATTA  | NM_001007122: | NM_001007122:                                      |
| 2488   | FSHB   | (follicle follicle stimulating hormone, beta polypeptide  | -5.47 | CACCAAGGATCTGGTGTATAA  | NM_000510:    | NM_000510:NM_001018080:                            |
| 2488   | FSHB   | (follicle follicle stimulating hormone, beta polypeptide  | -1.41 | TGTTTTGTCATAAGCATCAA   | NM_000510:    | NM_000510:NM_001018080:                            |
| 2492   | FSHR   | follicle stimulating hormone receptor                     | 0.21  | CAGGTGCACTTACAACCTTAA  | NM_000145:    | NM_000145:                                         |
| 2492   | FSHR   | follicle stimulating hormone receptor                     | 0.03  | CCAGGTGCACTTACAACCTTAA | NM_000145:    | NM_000145:                                         |
| 10468  | FST    | follicle stimulating hormone receptor                     | 1.58  | GCTGTTGTTGCTGCTATTTAA  | NM_006350:    | NM_006350:                                         |
| 10468  | FST    | follicle stimulating hormone receptor                     | -1.10 | CGCAATGAATGTGCACTCTCA  | NM_006350:    | NM_006350:NM_013409:                               |
| 2495   | FTH1   | ferritin, heavy polypeptide 1                             | 0.27  | ACGAGTATTGTTATTTATTA   | NM_002032:    | NM_002032:                                         |
| 2495   | FTH1   | ferritin, heavy polypeptide 1                             | 0.57  | TTGGATGAATCAGAAATCTA   | NM_002032:    | NM_002032:                                         |
| 2512   | FTL    | ferritin, light polypeptide                               | 1.11  | CAGCTTTCTTAACTATCTCA   | NM_000146:    | NM_000146:                                         |
| 2512   | FTL    | ferritin, light polypeptide                               | -4.84 | TAGTCTCTTCTGCAACCAA    | NM_000146:    | NM_000146:                                         |
| 2517   | FUCA1  | (fucosyl fucosidase, alpha-L-1, tissue                    | -0.67 | TTGCTATGTTTACAGTGATA   | NM_000147:    | NM_000147:                                         |
| 2517   | FUCA1  | (fucosyl fucosidase, alpha-L-1, tissue                    | 0.62  | TACGACCTTTGTTAACAGCTAT | NM_000147:    | NM_000147:                                         |
| 2519   | FUCA2  | fucosidase, alpha-L-2, plasma                             | 1.62  | AGCATGTTACTGAATCTGTA   | NM_032020:    | NM_032020:                                         |
| 2519   | FUCA2  | fucosidase, alpha-L-2, plasma                             | 0.32  | CCCTGACTAATGTGACTTAAA  | NM_032020:    | NM_032020:                                         |
| 197258 | FUK    | fucokinase                                                | -5.26 | CCGAAGGGAGTTGATTGGACA  | NM_145059:    | NM_145059:                                         |

|        |         |                                                                        |       |                        |            |                                          |
|--------|---------|------------------------------------------------------------------------|-------|------------------------|------------|------------------------------------------|
| 197258 | FUK     | fucokinase                                                             | -1.38 | TGGCTTAGAGTTGTAGACTTA  | NM_145059: | NM_145059:                               |
| 5045   | FURIN   | furin (paired basic amino acid cleaving enzyme)                        | -0.04 | GCGGCTCACCCGTCTCTATAA  | NM_002569: | NM_002569:                               |
| 5045   | FURIN   | furin (paired basic amino acid cleaving enzyme)                        | 0.60  | ACCAATGGTGTGGCCGGGAAA  | NM_002569: | NM_002569:                               |
| 2521   | FUS     | fusion (involved in t(12;16) in malignant liposarcoma)                 | 0.83  | ACAGCCCATGATTAATTTGTA  | NM_004960: | NM_001010850:NM_004960:                  |
| 2521   | FUS     | fusion (involved in t(12;16) in malignant liposarcoma)                 | 0.42  | CAAGCAGATTTGGTATTATTA  | NM_004960: | NM_001010850:NM_004960:                  |
| 2523   | FUT1    | fucosyltransferase 1 (galactoside 2-alpha-L-fucosyltransferase, H bloc | -5.05 | TAGGCTTATCAGGAGTTTACA  | NM_000148: | NM_000148:                               |
| 2523   | FUT1    | fucosyltransferase 1 (galactoside 2-alpha-L-fucosyltransferase, H bloc | -2.21 | CAGGTTGCCTCTACAATGAA   | NM_000148: | NM_000148:                               |
| 2524   | FUT2    | fucosyltransferase 2 (secretor status included)                        | -0.22 | CACCATCTACCTGGCCAAITA  | NM_000511: | NM_000511:                               |
| 2524   | FUT2    | fucosyltransferase 2 (secretor status included)                        | -1.50 | CACGGGGGAGACACCATCTA   | NM_000511: | NM_000511:                               |
| 2531   | FVT1    | (folliculi; follicular lymphoma variant translocation 1                | 1.22  | AAGAAATTCAGTTCCTTCAA   | NM_002035: | NM_002035:                               |
| 2531   | FVT1    | (folliculi; follicular lymphoma variant translocation 1                | 0.32  | TAGACTCAAATGCTTAGGGAA  | NM_002035: | NM_002035:                               |
| 2395   | FXN     | frataxin                                                               | 0.64  | GAGCTGAGTGATGAGCGTAA   | NM_000144: | NM_000144:NM_181425:                     |
| 2395   | FXN     | frataxin                                                               | -0.11 | CAGGCTCTCTTCAAAGTGTA   | NM_000144: | NM_000144:NM_181425:                     |
| 8087   | FXR1    | (fragile fragile X mental retardation, autosomal homolog 1             | 0.27  | ACTGAAGAAGTCTAGTGTTA   | NM_005087: | NM_001013438:NM_001013439:NM_005087:     |
| 8087   | FXR1    | (fragile fragile X mental retardation, autosomal homolog 1             | -0.91 | CAGCTAAGAATGGAAACGCCTA | NM_005087: | NM_001013438:NM_001013439:NM_005087:     |
| 486    | FXYD2   | FXYD domain containing ion transport regulator 2                       | 0.58  | ATCAATGAAGATGAGCCGTAA  | NM_001680: | NM_001680:NM_021603:                     |
| 486    | FXYD2   | FXYD domain containing ion transport regulator 2                       | 0.75  | CCGCTTCTACTATGACTATGA  | NM_001680: | NM_001680:NM_021603:                     |
| 53827  | FXYD5   | FXYD domain containing ion transport regulator 5                       | -3.72 | CTCAACTATCATGGACATCCA  | NM_014164: | NM_144779:NM_014164:                     |
| 53827  | FXYD5   | FXYD domain containing ion transport regulator 5                       | 0.63  | GAGGACAGACGTTGAAAGATA  | NM_014164: | NM_144779:NM_014164:                     |
| 2533   | FYB     | FYN binding protein (FYB-120/130)                                      | -0.38 | AAGCCAGACGCTTACTCTCAA  | NM_199335: | NM_199335:NM_001465:                     |
| 2533   | FYB     | FYN binding protein (FYB-120/130)                                      | 9.00  | CAGGAAGAAATGACCTGTCTA  | NM_199335: | NM_199335:NM_001465:                     |
| 2534   | FYN     | FYN oncogene related to SRC, FGR, YES                                  | -0.56 | AAGAAGCAGGATGCTGATCTA  | NM_002037: | NM_002037:                               |
| 2534   | FYN     | FYN oncogene related to SRC, FGR, YES                                  | -0.54 | AAGACATGGTGATATATAAA   | NM_002037: | NM_002037:                               |
| 8321   | FZD1    | (frizzled; frizzled homolog 1 (Drosophila)                             | -6.14 | ATGCCGCTACTTGAACCTTAA  | NM_003505: | NM_003505:                               |
| 8321   | FZD1    | (frizzled; frizzled homolog 1 (Drosophila)                             | 0.79  | CCCGCGCTCATGAATCGCAA   | NM_003505: | NM_003505:                               |
| 11211  | FZD10   | frizzled homolog 10 (Drosophila)                                       | 0.38  | CAGCCGTAGGTTAAAGAAAGAA | NM_007197: | NM_007197:                               |
| 11211  | FZD10   | frizzled homolog 10 (Drosophila)                                       | 0.52  | CCCGATTATGGAGAGTTCAA   | NM_007197: | NM_007197:                               |
| 2535   | FZD2    | (frizzled; frizzled homolog 2 (Drosophila)                             | 1.15  | CACGCTCATACATGATCAATA  | NM_001466: | NM_001466:                               |
| 2535   | FZD2    | (frizzled; frizzled homolog 2 (Drosophila)                             | 0.45  | CACGCTTGGTAGACATGCA    | NM_001466: | NM_001466:                               |
| 7976   | FZD3    | frizzled homolog 3 (Drosophila)                                        | -0.18 | ATGCTTGTATATTATGTAAA   | NM_017412: | NM_017412:                               |
| 7976   | FZD3    | frizzled homolog 3 (Drosophila)                                        | 0.51  | CAGAAGAAATTTGATTAAGTCA | NM_017412: | NM_017412:                               |
| 8322   | FZD4    | frizzled homolog 4 (Drosophila)                                        | -1.29 | CAGAATGATAGTGCCTTTAAA  | NM_012193: | NM_012193:                               |
| 8322   | FZD4    | frizzled homolog 4 (Drosophila)                                        | 1.78  | TAGGTGATGATAGTGTGCAA   | NM_012193: | NM_012193:                               |
| 7855   | FZD5    | frizzled homolog 5 (Drosophila)                                        | -2.00 | CAGCATTGGTGGCCCTGCTA   | NM_003468: | NM_003468:                               |
| 7855   | FZD5    | frizzled homolog 5 (Drosophila)                                        | -1.12 | TAAGTTGGCGTTGTAATGAA   | NM_003468: | NM_003468:                               |
| 8323   | FZD6    | frizzled homolog 6 (Drosophila)                                        | -4.84 | AACCCACTTATTGATACCTTA  | NM_003506: | NM_003506:                               |
| 8323   | FZD6    | frizzled homolog 6 (Drosophila)                                        | 0.64  | AGCGATATTATGCGCAACTCAA | NM_003506: | NM_003506:                               |
| 8324   | FZD7    | frizzled homolog 7 (Drosophila)                                        | -1.08 | AACGGCGATGTGAATCGTCAA  | NM_003507: | NM_003507:                               |
| 8324   | FZD7    | frizzled homolog 7 (Drosophila)                                        | 0.79  | CAACGGCGTATGACTTTTAA   | NM_003507: | NM_003507:                               |
| 8325   | FZD8    | frizzled homolog 8 (Drosophila)                                        | -7.48 | CAAGTAAATATCATCTGTTGAA | NM_031866: | NM_031866:                               |
| 8325   | FZD8    | frizzled homolog 8 (Drosophila)                                        | -0.01 | CCGCTCGTCAATCAAGCAACA  | NM_031866: | NM_031866:                               |
| 8326   | FZD9    | frizzled homolog 9 (Drosophila)                                        | -0.61 | CACCTGCGTCACTGTTGCTGA  | NM_003508: | NM_003508:                               |
| 8326   | FZD9    | frizzled homolog 9 (Drosophila)                                        | -0.47 | CAGCCGGAGTTTATTAATGA   | NM_003508: | NM_003508:                               |
| 51343  | FZR1    | fizzy/cell division cycle 20 related 1 (Drosophila)                    | -2.55 | CGGGTCGATCTCCACATCCA   | NM_016263: | NM_016263:                               |
| 51343  | FZR1    | fizzy/cell division cycle 20 related 1 (Drosophila)                    | 0.60  | TGCAGTGACGCTGCTATTTAA  | NM_016263: | NM_016263:                               |
| 9636   | G1P2    | interferon, alpha-inducible protein (clone IFI-15K)                    | 0.08  | AATGCGACGACACCTCGAGCA  | NM_005101: | NM_005101:                               |
| 9636   | G1P2    | interferon, alpha-inducible protein (clone IFI-15K)                    | -1.07 | AAGCACCGTTCATGAATCT    | NM_005101: | NM_005101:                               |
| 10146  | G3BP    | Ras-GTPase-activating protein SH3-domain-binding protein               | -0.21 | CAGAAGAAGAAATCCACAGAAA | NM_005754: | NM_005754:NM_198395:                     |
| 10146  | G3BP    | Ras-GTPase-activating protein SH3-domain-binding protein               | -6.44 | CAGGAGGAGTCTGAGAAAGAA  | NM_005754: | NM_005754:NM_198395:                     |
| 9908   | G3BP2   | Ras-GTPase activating protein SH3 domain-binding protein 2             | -0.30 | COGAGTGGCTCGTGAATTTAA  | NM_012297: | NM_012297:NM_203504:NM_203505:           |
| 9908   | G3BP2   | Ras-GTPase activating protein SH3 domain-binding protein 2             | 0.43  | TTCAGTGAATGCTACTACTAAA | NM_012297: | NM_012297:NM_203504:NM_203505:           |
| 2538   | G6PC    | glucose-6-phosphatase, catalytic (glycogen storage disease type I, voi | -0.91 | CAGCAGGTGATATACTACGTGA | NM_000151: | NM_000151:                               |
| 2538   | G6PC    | glucose-6-phosphatase, catalytic (glycogen storage disease type I, voi | 0.13  | TGGATCCAGTCAACACATTA   | NM_000151: | NM_000151:                               |
| 57818  | G6PC2   | glucose-6-phosphatase, catalytic, 2                                    | 1.45  | CAGAGTATTCTAGCAACACA   | NM_021176: | NM_021176:                               |
| 57818  | G6PC2   | glucose-6-phosphatase, catalytic, 2                                    | 0.29  | CTGGTGGTCCAAAGAACTCA   | NM_021176: | NM_021176:                               |
| 92579  | G6PC3   | glucose 6 phosphatase, catalytic, 3                                    | 1.24  | CAGGTGCTGGCTGGCCTAATA  | NM_138387: | NM_138387:                               |
| 92579  | G6PC3   | glucose 6 phosphatase, catalytic, 3                                    | -1.87 | GTGGCTCAACCTCATCTTCAA  | NM_138387: | NM_138387:                               |
| 2539   | G6PD    | glucose-6-phosphate dehydrogenase                                      | -0.35 | CAGCCTCTGCTATAAGAAA    | NM_000402: | NM_000402:                               |
| 2539   | G6PD    | glucose-6-phosphate dehydrogenase                                      | -3.73 | CACCAAGATGATGACCAAGAAA | NM_000402: | NM_000402:                               |
| 2548   | GAA     | glucosidase, alpha; acid (Pompe disease, glycogen storage disease ty   | 1.57  | TTGGGAGATTTCAAATCTTAA  | NM_000152: | NM_000152:                               |
| 2548   | GAA     | glucosidase, alpha; acid (Pompe disease, glycogen storage disease ty   | 0.54  | CAGGAATAACACAGTCTGTA   | NM_000152: | NM_000152:                               |
| 2549   | GAB1    | (GRB2; GRB2-associated binding protein 1                               | -0.02 | ACAGAAGACCTTGGCTCTAAA  | NM_002039: | NM_207123:NM_002039:                     |
| 2549   | GAB1    | (GRB2; GRB2-associated binding protein 1                               | 0.02  | CACGAGCATTTTCCAAAGTATA | NM_002039: | NM_207123:NM_002039:                     |
| 9846   | GAB2    | GRB2-associated binding protein 2                                      | 0.66  | AACCTCAAACCTGATCGGAAA  | NM_012296: | NM_012296:NM_080491:                     |
| 9846   | GAB2    | GRB2-associated binding protein 2                                      | -8.34 | CACCAATTTCTGAAGCAACTA  | NM_012296: | NM_012296:NM_080491:                     |
| 11337  | GABARAP | GABA(A) receptor-associated protein                                    | -0.32 | AAGTAGGAGGACACATCAATA  | NM_007278: | NM_007278:                               |
| 11337  | GABARAP | GABA(A) receptor-associated protein                                    | -0.46 | CCGGTGGCCGTGATAGTAGA   | NM_007278: | NM_007278:                               |
| 2550   | GABBR1  | gamma-aminobutyric acid (GABA) B receptor, 1                           | 1.06  | CGAATCTGCTCAAGTCTTA    | NM_001470: | NM_001470:NM_021905:                     |
| 2550   | GABBR1  | gamma-aminobutyric acid (GABA) B receptor, 1                           | 1.34  | TGGGAAGAACATGCTATCCAA  | NM_001470: | NM_021903:NM_001470:NM_021904:NM_021905: |
| 9568   | GABBR2  | gamma-aminobutyric acid (GABA) B receptor, 2                           | 0.77  | CACGCCTGTTCTAGCGGATAA  | NM_005458: | NM_005458:                               |
| 9568   | GABBR2  | gamma-aminobutyric acid (GABA) B receptor, 2                           | 0.19  | CCAGCAAAACACGATAAAGAA  | NM_005458: | NM_005458:                               |
| 2554   | GABRA1  | gamma-aminobutyric acid (GABA) A receptor, alpha 1                     | 0.42  | CAGCATAAATCTGTAGCATT   | NM_000806: | NM_000806:                               |
| 2554   | GABRA1  | gamma-aminobutyric acid (GABA) A receptor, alpha 1                     | 1.15  | CACGGTCTAAACACACTTAGA  | NM_000806: | NM_000806:                               |
| 2555   | GABRA2  | (gar gamma-aminobutyric acid (GABA) A receptor, alpha 2                | -0.15 | TTCCGTTATGATACAGAACAA  | NM_000807: | NM_000807:                               |
| 2555   | GABRA2  | (gar gamma-aminobutyric acid (GABA) A receptor, alpha 2                | 1.65  | ATCCTCGACTAAACAATTTTA  | NM_000807: | NM_000807:                               |
| 2556   | GABRA3  | gamma-aminobutyric acid (GABA) A receptor, alpha 3                     | -0.15 | CCCTCAATTCATATTTATGAA  | NM_000808: | NM_000808:                               |
| 2556   | GABRA3  | gamma-aminobutyric acid (GABA) A receptor, alpha 3                     | -5.29 | CCCGACTGAGACCAAGACCTA  | NM_000808: | NM_000808:                               |
| 2557   | GABRA4  | (gar gamma-aminobutyric acid (GABA) A receptor, alpha 4                | -0.65 | TTGCTATAAGATATAACCTAA  | NM_000809: | NM_000809:                               |
| 2557   | GABRA4  | (gar gamma-aminobutyric acid (GABA) A receptor, alpha 4                | 0.40  | CAAGTAGTAAAGGATAAATTA  | NM_000809: | NM_000809:                               |
| 2558   | GABRA5  | gamma-aminobutyric acid (GABA) A receptor, alpha 5                     | 0.53  | CCCATTGATAATTCAGACAAA  | NM_000810: | NM_000810:                               |
| 2558   | GABRA5  | gamma-aminobutyric acid (GABA) A receptor, alpha 5                     | 2.01  | CGGCACTTCAACTTAGTTTA   | NM_000810: | NM_000810:                               |
| 2559   | GABRA6  | gamma-aminobutyric acid (GABA) A receptor, alpha 6                     | 1.11  | TGCGAGCTGTCAACTACTTTTA | NM_000811: | NM_000811:                               |
| 2559   | GABRA6  | gamma-aminobutyric acid (GABA) A receptor, alpha 6                     | -0.23 | CCAGGTGCTTCTTGAGATTA   | NM_000811: | NM_000811:                               |
| 2560   | GABRB1  | (gar gamma-aminobutyric acid (GABA) A receptor, beta 1                 | 0.89  | TCCTCGATTTCACTGATTTTA  | NM_000812: | NM_000812:                               |
| 2560   | GABRB1  | (gar gamma-aminobutyric acid (GABA) A receptor, beta 1                 | -0.47 | CACCTCGGAGATCGAAAGTTA  | NM_000812: | NM_000812:                               |
| 2561   | GABRB2  | gamma-aminobutyric acid (GABA) A receptor, beta 2                      | -1.26 | ATCCCTCAGCTTTAAGCTTAA  | NM_000813: | NM_021911:NM_000813:                     |
| 2561   | GABRB2  | gamma-aminobutyric acid (GABA) A receptor, beta 2                      | 1.91  | TACCTATTCTCGAAGCATAA   | NM_000813: | NM_021911:NM_000813:                     |
| 2562   | GABRB3  | gamma-aminobutyric acid (GABA) A receptor, beta 3                      | -1.66 | TAGGCCTGATATCCAACAGAA  | NM_000814: | NM_000814:NM_021912:                     |
| 2562   | GABRB3  | gamma-aminobutyric acid (GABA) A receptor, beta 3                      | 0.21  | CTCGTTGTAAGTACTCTAATA  | NM_000814: | NM_000814:NM_021912:                     |
| 2563   | GABRD   | gamma-aminobutyric acid (GABA) A receptor, delta                       | -4.62 | CACGAGCTGATGAACCTCAA   | NM_000815: | NM_000815:                               |
| 2563   | GABRD   | gamma-aminobutyric acid (GABA) A receptor, delta                       | 0.70  | ATCGGAGGACATGCTACTA    | NM_000815: | NM_000815:                               |
| 2564   | GABRE   | (gam gamma-aminobutyric acid (GABA) A receptor, epsilon                | 0.10  | CACCTAACCATCAACATCAA   | NM_004961: | NM_021990:NM_021987:NM_021984:NM_004961: |
| 2564   | GABRE   | (gam gamma-aminobutyric acid (GABA) A receptor, epsilon                | -1.18 | CAGGCATTACTGCCATTGAT   | NM_004961: | NM_021990:NM_021987:NM_021984:NM_004961: |
| 2565   | GABRG1  | gamma-aminobutyric acid (GABA) A receptor, gamma 1                     | -0.02 | ACCTGGTTGACAGTCGTTTA   | NM_173536: | NM_173536:                               |
| 2565   | GABRG1  | gamma-aminobutyric acid (GABA) A receptor, gamma 1                     | 0.86  | AGGATTAGTTATACAATTTAA  | NM_173536: | NM_173536:                               |
| 2566   | GABRG2  | gamma-aminobutyric acid (GABA) A receptor, gamma 2                     | 0.94  | TAGATTCATAATGCAATTAGA  | NM_000816: | NM_198903:NM_198904:NM_000816:           |

|        |         |                                                                        |       |                        |            |                                                               |
|--------|---------|------------------------------------------------------------------------|-------|------------------------|------------|---------------------------------------------------------------|
| 2566   | GABRG2  | gamma-aminobutyric acid (GABA) A receptor, gamma 2                     | -0.03 | CACCC2AAGGTGACAATTGA   | NM_000816: | NM_198903.NM_198904.NM_000816:                                |
| 2567   | GABRG3  | (gar gamma-aminobutyric acid (GABA) A receptor, gamma 3                | -0.09 | CACCATCTCCGGCAATTCTAA  | NM_033223: | NM_033223:                                                    |
| 2567   | GABRG3  | (gar gamma-aminobutyric acid (GABA) A receptor, gamma 3                | 0.95  | ACCGCCGTAATTCAGCTTGA   | NM_033223: | NM_033223:                                                    |
| 2568   | GABRP   | gamma-aminobutyric acid (GABA) A receptor, pi                          | 0.44  | CAGAAATAACCAAGGCTCTA   | NM_014211: | NM_014211:                                                    |
| 2568   | GABRP   | gamma-aminobutyric acid (GABA) A receptor, pi                          | 1.03  | AAGTGGCTTAGCTTAAGTAAA  | NM_014211: | NM_014211:                                                    |
| 55879  | GABRQ   | gamma-aminobutyric acid (GABA) receptor, theta                         | -0.05 | CTGGTATACCATATGTATTA   | NM_018558: | NM_018558:                                                    |
| 55879  | GABRQ   | gamma-aminobutyric acid (GABA) receptor, theta                         | -0.12 | TAGCAAGGAGGTGTATTTCTA  | NM_018558: | NM_018558:                                                    |
| 2569   | GABRR1  | (gar gamma-aminobutyric acid (GABA) receptor, rho 1                    | 0.46  | CAGAAATAACTGTATAATGAA  | NM_002042: | NM_002042:                                                    |
| 2569   | GABRR1  | (gar gamma-aminobutyric acid (GABA) receptor, rho 1                    | -0.19 | CACCACCAACTGGCTTTCTA   | NM_002042: | NM_002042:                                                    |
| 2570   | GABRR2  | (gar gamma-aminobutyric acid (GABA) receptor, rho 2                    | -0.17 | ATGCCATTGACAAATACTCTA  | NM_002043: | NM_002043:                                                    |
| 2570   | GABRR2  | (gar gamma-aminobutyric acid (GABA) receptor, rho 2                    | -0.72 | TACGGTCACTGCCATGTGCCAA | NM_002043: | NM_002043:                                                    |
| 200959 | GABRR3  | gamma-aminobutyric acid (GABA) receptor, rho 3                         | -3.60 | CTGGATCATATTGAAACCAAAA | XM_116036: | XM_116036:                                                    |
| 200959 | GABRR3  | gamma-aminobutyric acid (GABA) receptor, rho 3                         | 0.00  | TACAATATTGATGCAAGTTCAA | XM_116036: | XM_116036:                                                    |
| 2571   | GAD1    | glutamate decarboxylase 1 (brain, 67kDa)                               | 0.57  | CCCATTTGATATGTATCTTAT  | NM_000817: | NM_000817:                                                    |
| 2571   | GAD1    | glutamate decarboxylase 1 (brain, 67kDa)                               | 0.48  | CGCCATAAECTCAACGGCATA  | NM_000817: | NM_000817:                                                    |
| 2572   | GAD2    | glutamate decarboxylase 2 (pancreatic islets and brain, 65kDa)         | -0.31 | CACCTGTCTTCTCCACCAAAA  | NM_000818: | NM_000818:                                                    |
| 2572   | GAD2    | glutamate decarboxylase 2 (pancreatic islets and brain, 65kDa)         | -0.83 | CGCCTTGGACAAGATTATAA   | NM_000818: | NM_000818:                                                    |
| 1647   | GADD45A | growth arrest and DNA-damage-inducible, alpha                          | 1.46  | AAGGGTTAATCATATTTGAAA  | L24498:    | NM_001924:                                                    |
| 1647   | GADD45A | growth arrest and DNA-damage-inducible, alpha                          | 1.57  | ACCAAATATGTTAAAGTTTAA  | L24498:    | NM_001924:                                                    |
| 4616   | GADD45B | growth arrest and DNA-damage-inducible, beta                           | -4.30 | GAGGATGACATCGCCCTGCAC  | NM_015675: | NM_015675:                                                    |
| 4616   | GADD45B | growth arrest and DNA-damage-inducible, beta                           | 0.51  | TCGCCATTTGCGAATTAATAA  | NM_015675: | NM_015675:                                                    |
| 339896 | GADL1   | glutamate decarboxylase-like 1                                         | -2.11 | CAGGCTGAATGTTTATCTGCAA | NM_207359: | NM_207359:                                                    |
| 339896 | GADL1   | glutamate decarboxylase-like 1                                         | 1.02  | AAGCACAATAATTTGACAGAAA | NM_207359: | NM_207359:                                                    |
| 2580   | GAK     | cyclin G associated kinase                                             | 0.11  | ACGCGTGTGACATTCAGAAA   | NM_005255: | NM_005255:                                                    |
| 2580   | GAK     | cyclin G associated kinase                                             | 0.05  | CCCGTGGTTGCTGTACAGAAA  | NM_005255: | NM_005255:                                                    |
| 2581   | GALC    | (galact galactosylceramidase                                           | -0.23 | TAGGAATTTAAGAGTCTAA    | NM_000153: | NM_000153:                                                    |
| 2581   | GALC    | (galact galactosylceramidase                                           | -0.88 | TACACTCACGTTAACTATTTAA | NM_000153: | NM_000153:                                                    |
| 2582   | GALE    | (UDP-g UDP-galactose-4-epimerase                                       | -3.10 | CAGCTTTATGGCGGTCATCCA  | NM_000403: | NM_000403.NM_001008216:                                       |
| 2582   | GALE    | (UDP-g UDP-galactose-4-epimerase                                       | 1.36  | AGAGCTTCCAAAGTATTTTAA  | NM_000403: | NM_000403.NM_001008216:                                       |
| 2584   | GALK1   | galactokinase 1                                                        | 1.55  | CGCCTCATGGTGAGAGGCCA   | NM_000154: | NM_000154:                                                    |
| 2584   | GALK1   | galactokinase 1                                                        | 0.49  | GAGGTACAACCTGGAAGAGCTA | NM_000154: | NM_000154:                                                    |
| 2585   | GALK2   | galactokinase 2                                                        | 0.33  | AAAGCTCTCTATGCTTCATAA  | NM_002044: | NM_001001556.NM_002044:                                       |
| 2585   | GALK2   | galactokinase 2                                                        | 0.12  | TGCGGAGTGCTCCAGTTTAA   | NM_002044: | NM_001001556.NM_002044:                                       |
| 2588   | GALNS   | galactosamine (N-acetyl)-6-sulfate sulfatase (Morquio syndrome, muc    | -3.90 | CAGGGCCATTGATGGCCTCAA  | NM_000512: | NM_000512:                                                    |
| 2588   | GALNS   | galactosamine (N-acetyl)-6-sulfate sulfatase (Morquio syndrome, muc    | -0.08 | CGGAGATTGATGACAGCATT   | NM_000512: | NM_000512:                                                    |
| 2587   | GALR1   | galanin receptor 1                                                     | -3.79 | CACCTGAGTGATACTAAAGAA  | NM_001480: | NM_001480:                                                    |
| 2587   | GALR1   | galanin receptor 1                                                     | 0.55  | CAGCGAGTTGATGATAGATAA  | NM_001480: | NM_001480:                                                    |
| 8811   | GALR2   | galanin receptor 2                                                     | -0.10 | CCCGCTCACGCGGCCACTTA   | NM_003857: | NM_003857:                                                    |
| 8811   | GALR2   | galanin receptor 2                                                     | -1.26 | TACCAACCTGTTCACTCTAA   | NM_003857: | NM_003857:                                                    |
| 8484   | GALR3   | (galal galanin receptor 3                                              | -1.22 | CACGACCTGTTTCATCCTCAA  | NM_003614: | NM_003614:                                                    |
| 8484   | GALR3   | (galal galanin receptor 3                                              | 0.23  | CTGCCGAGGACCGGAATAAA   | NM_003614: | NM_003614:                                                    |
| 2592   | GALT    | (galact galactose-1-phosphate uridylyltransferase                      | 0.25  | CGGAAATTCATGGTTGGCTA   | NM_147131: | NM_147131.NM_147132.NM_000155:                                |
| 2592   | GALT    | (galact galactose-1-phosphate uridylyltransferase                      | 0.16  | AGCAATAATCCAGTAATCTAA  | NM_147131: | NM_147131.NM_147132:                                          |
| 2593   | GAMT    | guanidinoacetate N-methyltransferase                                   | 1.37  | AACCTGCTGACGGTCACTT    | NM_000156: | NM_000156.NM_138924:                                          |
| 2593   | GAMT    | guanidinoacetate N-methyltransferase                                   | -2.04 | AACACAGTTCAACTTCATCA   | NM_000156: | NM_000156.NM_138924:                                          |
| 8139   | GAN     | giant axonal neuropathy (gigaxonin)                                    | 0.31  | CGCACAGTCATGATTTCAA    | NM_022041: | NM_022041:                                                    |
| 8139   | GAN     | giant axonal neuropathy (gigaxonin)                                    | -0.35 | ATCATGTAATTTGAAATGAA   | NM_022041: | NM_022041:                                                    |
| 23193  | GANAB   | glucosidase, alpha; neutral AB                                         | -6.24 | GAGGTGGTATGACATTTCAA   | NM_014610: | NM_014610.NM_198334.NM_198335:                                |
| 23193  | GANAB   | glucosidase, alpha; neutral AB                                         | -6.35 | CAGCACAATGATATAATCCGA  | NM_014610: | NM_014610.NM_198334.NM_198335:                                |
| 2595   | GANC    | glucosidase, alpha; neutral C                                          | -1.28 | CTGGATGCTATGGATACCAA   | NM_198141: | NM_198141:                                                    |
| 2595   | GANC    | glucosidase, alpha; neutral C                                          | 0.21  | CTCAGTATATGTGAAGGCCAA  | NM_198141: | NM_198141:                                                    |
| 26330  | GAPDHS  | glyceraldehyde-3-phosphate dehydrogenase, spermatogenic                | -2.12 | CCGAGACAAGTGAACCGGAA   | NM_014364: | NM_014364:                                                    |
| 26330  | GAPDHS  | glyceraldehyde-3-phosphate dehydrogenase, spermatogenic                | -0.39 | CTCCATGAACATTTGTAGGCAA | NM_014364: | NM_014364:                                                    |
| 2620   | GAS2    | growth arrest-specific 2                                               | 1.40  | ACGTGTTCTATTGAATCGGAA  | NM_005256: | NM_177553.NM_005256:                                          |
| 2620   | GAS2    | growth arrest-specific 2                                               | 1.65  | TACAGAGTATTCACAATAGTA  | NM_005256: | NM_177553.NM_005256:                                          |
| 2621   | GAS6    | growth arrest-specific 6                                               | -2.99 | CAGCAGCGCCCGGTCATCAA   | NM_000820: | NM_000820:                                                    |
| 2621   | GAS6    | growth arrest-specific 6                                               | 0.00  | TGCGACAAGATGTCAACGAA   | NM_000820: | NM_000820:                                                    |
| 2520   | GAST    | gastrin                                                                | -0.14 | CAGCAGCCAGATGACCCCTTA  | NM_000805: | NM_000805:                                                    |
| 2520   | GAST    | gastrin                                                                | -0.31 | CCGCACTGCTGAGGATGAGAA  | NM_000805: | NM_000805:                                                    |
| 2623   | GATA1   | GATA binding protein 1 (globin transcription factor 1)                 | -0.67 | AAGGATGGTATTGAGACTCGA  | NM_002049: | NM_002049:                                                    |
| 2623   | GATA1   | GATA binding protein 1 (globin transcription factor 1)                 | 0.68  | AAGCGCTGATTTGACAGTAAA  | NM_002049: | NM_002049:                                                    |
| 2624   | GATA2   | GATA binding protein 2                                                 | -1.39 | AAGGCTCGTCTCCTGTTCAAAA | NM_032638: | NM_032638:                                                    |
| 2624   | GATA2   | GATA binding protein 2                                                 | -0.63 | CTGGCGCAACAATCATGGAAT  | NM_032638: | NM_032638:                                                    |
| 2628   | GATM    | glycine amidinotransferase (L-arginine:glycine amidinotransferase)     | 0.41  | ACCCAGCGTACAGGTCATTTA  | NM_001482: | NM_001482:                                                    |
| 2628   | GATM    | glycine amidinotransferase (L-arginine:glycine amidinotransferase)     | 0.05  | CAGGTCAATTTATCAAGACTA  | NM_001482: | NM_001482:                                                    |
| 2629   | GBA     | glucosidase, beta; acid (includes glucosylceramidase)                  | 0.30  | AAGAAGAAATCGGATATAACA  | NM_000157: | NM_001005741.NM_000157.NM_001005749.NM_01005742.NM_001005750: |
| 2629   | GBA     | glucosidase, beta; acid (includes glucosylceramidase)                  | -2.58 | CCAGAACAGAAGTCCAGAAA   | NM_000157: | NM_001005741.NM_000157.NM_001005749.NM_01005742.NM_001005750: |
| 57704  | GBA2    | glucosidase, beta (bile acid) 2                                        | 0.72  | CCGCGTCAATGCATATTTAAT  | NM_020944: | NM_020944:                                                    |
| 57704  | GBA2    | glucosidase, beta (bile acid) 2                                        | -0.17 | TCGCGTCAATGCATATTTAAT  | NM_020944: | NM_020944:                                                    |
| 2632   | GBE1    | glucan (1,4-alpha-), branching enzyme 1 (glycogen branching enzyme     | -0.06 | TCGCTACAAGTCTAAATATA   | NM_000158: | NM_000158:                                                    |
| 2632   | GBE1    | glucan (1,4-alpha-), branching enzyme 1 (glycogen branching enzyme     | 0.96  | ACGCTGTGCCCGATTCTATA   | NM_000158: | NM_000158:                                                    |
| 2639   | GCDH    | glutaryl-Coenzyme A dehydrogenase                                      | -1.71 | CAGACTCCATTTACCCTGAAA  | NM_000159: | NM_000159:                                                    |
| 2639   | GCDH    | glutaryl-Coenzyme A dehydrogenase                                      | -0.05 | TCGTTCAAGTGTGTTCCCTAA  | NM_000159: | NM_013976.NM_000159:                                          |
| 2641   | GCG     | glucagon                                                               | 0.35  | CTGCATTATAAATAGGAGA    | NM_002054: | NM_002054:                                                    |
| 2641   | GCG     | glucagon                                                               | -0.46 | ATGTATCAAGATACAATTTAA  | NM_002054: | NM_002054:                                                    |
| 2642   | GCGR    | glucagon receptor                                                      | -4.16 | CAACAGAACCTTCGACAAAGTA | NM_000160: | NM_000160:                                                    |
| 2642   | GCGR    | glucagon receptor                                                      | -6.47 | CTCCACAATAAAGAGCTCAA   | NM_000160: | NM_000160:                                                    |
| 2643   | GCH1    | GTP cyclohydrolase 1 (dopa-responsive dystonia)                        | -2.26 | CCCGGTTCTTTGTGGTCTA    | NM_000161: | NM_000161.NM_001024024.NM_001024071.NM_01024070:              |
| 2643   | GCH1    | GTP cyclohydrolase 1 (dopa-responsive dystonia)                        | -2.58 | CAGAATGAACGACGGTGGAA   | NM_000161: | NM_000161.NM_001024024.NM_001024071.NM_01024070:              |
| 2645   | GCK     | glucokinase (hexokinase 4, maturity onset diabetes of the young 2)     | 0.00  | CAGGACTTTGATGCATTTCCA  | NM_000162: | NM_033507.NM_033508.NM_000162:                                |
| 2645   | GCK     | glucokinase (hexokinase 4, maturity onset diabetes of the young 2)     | 0.47  | CAGCTGTATGAGAAAGCTATA  | NM_000162: | NM_033507.NM_033508.NM_000162:                                |
| 2729   | GCLC    | glutamate-cysteine ligase, catalytic subunit                           | 0.59  | TAGGATCAGTAAATCCCGATA  | NM_001498: | NM_001498:                                                    |
| 2729   | GCLC    | glutamate-cysteine ligase, catalytic subunit                           | -0.23 | AAGGCTTTCTTTGGTAGTAA   | NM_001498: | NM_001498:                                                    |
| 2730   | GCLM    | glutamate-cysteine ligase, modifier subunit                            | 1.58  | CTAATTGAAATGTCTATAAA   | NM_002061: | NM_002061:                                                    |
| 2730   | GCLM    | glutamate-cysteine ligase, modifier subunit                            | 0.76  | TGGGATTTACTAGTAGTGTAA  | NM_002061: | NM_002061:                                                    |
| 2651   | GCNT2   | glucosaminyl (N-acetyl) transferase 2, l-branching enzyme (I blood grc | -0.62 | ATGCGGTAGAGCAACTATTTAA | NM_001491: | NM_001491:                                                    |
| 2651   | GCNT2   | glucosaminyl (N-acetyl) transferase 2, l-branching enzyme (I blood grc | -3.11 | CAGGACCTGGCTACGTAATTTA | NM_001491: | NM_145655.NM_001491.NM_145649:                                |
| 7841   | GCS1    | glucosidase 1                                                          | 1.08  | CCCTTGGATACCAGTAATTTCA | NM_006302: | NM_006302:                                                    |
| 7841   | GCS1    | glucosidase 1                                                          | 0.97  | CCGTGCCAACGTTGGTAGGCAA | NM_006302: | NM_006302:                                                    |
| 54332  | GDAP1   | ganglioside-induced differentiation-associated protein 1               | -0.53 | CGAGCGTGTCTGGAAGAGAAA  | NM_018972: | NM_018972:                                                    |
| 54332  | GDAP1   | ganglioside-induced differentiation-associated protein 1               | -2.21 | TCGCCGTTATGCAACTACAAA  | NM_018972: | NM_018972:                                                    |
| 2662   | GDF10   | growth differentiation factor 10                                       | -0.66 | TAGTAACGTGGGAATCTAAA   | NM_004962: | NM_004962:                                                    |
| 2662   | GDF10   | growth differentiation factor 10                                       | -0.92 | AACAGGATAATCGTGGTGTAA  | NM_004962: | NM_004962:                                                    |
| 10220  | GDF11   | growth differentiation factor 11                                       | 1.24  | CTGAAATGGAGTAATAATGTA  | NM_005811: | NM_005811:                                                    |
| 10220  | GDF11   | growth differentiation factor 11                                       | -1.87 | CAGAGCATCGACTTCAAGCAA  | NM_005811: | NM_005811:                                                    |



|        |        |                                                                             |       |                        |               |                                                                                                                                              |
|--------|--------|-----------------------------------------------------------------------------|-------|------------------------|---------------|----------------------------------------------------------------------------------------------------------------------------------------------|
| 9518   | GDF15  | growth differentiation factor 15                                            | 0.86  | AAAGCTGTCTGAACCTGTTAAA | NM_004864:    | NM_004864:                                                                                                                                   |
| 9518   | GDF15  | growth differentiation factor 15                                            | 0.55  | ATGGAACCTGTGATTTATTTTA | NM_004864:    | NM_004864:                                                                                                                                   |
| 2658   | GDF2   | growth differentiation factor 2                                             | 0.98  | CACACCATCAATGTATGTGA   | NM_016204:    | NM_016204:                                                                                                                                   |
| 2658   | GDF2   | growth differentiation factor 2                                             | -2.17 | AAGGACTGATTCATCTGCAT   | NM_016204:    | NM_016204:                                                                                                                                   |
| 9573   | GDF3   | growth differentiation factor 3                                             | -0.07 | AAGGAGTGTCTTAGGGTAAA   | NM_020634:    | NM_020634:                                                                                                                                   |
| 9573   | GDF3   | growth differentiation factor 3                                             | 0.96  | TCCAATTATGCTTCATGCAA   | NM_020634:    | NM_020634:                                                                                                                                   |
| 8200   | GDF5   | growth differentiation factor 5 (cartilage-derived morphogenetic protein    | 1.92  | TAGATTTAAATGTATATTGAT  | NM_000557:    | NM_000557:                                                                                                                                   |
| 8200   | GDF5   | growth differentiation factor 5 (cartilage-derived morphogenetic protein    | 1.40  | CTGTTAGACTGTAGATTTAA   | NM_000557:    | NM_000557:                                                                                                                                   |
| 392255 | GDF6   | growth differentiation factor 6                                             | 0.00  | ATGATATGCAATCGAATGCTA  | NM_001001557: | NM_001001557:                                                                                                                                |
| 392255 | GDF6   | growth differentiation factor 6                                             | -1.65 | TCAGATTGTAATATCAGTTA   | NM_001001557: | NM_001001557:                                                                                                                                |
| 151449 | GDF7   | growth differentiation factor 7                                             | 0.74  | AACAACGTTGTCTACAAGCAA  | NM_182828:    | NM_182828:                                                                                                                                   |
| 151449 | GDF7   | growth differentiation factor 7                                             | -1.00 | GCCTGTGCACGTGGACTTCAA  | NM_182828:    | NM_182828:                                                                                                                                   |
| 2660   | GDF8   | growth differentiation factor 8                                             | -0.42 | CTGATGCTATCTCAACAATAA  | NM_005259:    | NM_005259:                                                                                                                                   |
| 2660   | GDF8   | growth differentiation factor 8                                             | 0.82  | AGGAGTATGCTTTAAAGTCTA  | NM_005259:    | NM_005259:                                                                                                                                   |
| 2661   | GDF9   | growth differentiation factor 9                                             | -1.21 | CAGCTGGTATTCCTTCACTA   | NM_005260:    | NM_005260:                                                                                                                                   |
| 2661   | GDF9   | growth differentiation factor 9                                             | -2.87 | CAAGTCAGTCTTGGTGTACAA  | NM_005260:    | NM_005260:                                                                                                                                   |
| 2664   | GD11   | GDP dissociation inhibitor 1                                                | -3.38 | CCGCATCAAGTTGTACAGTGA  | NM_001493:    | NM_001493:                                                                                                                                   |
| 2664   | GD11   | GDP dissociation inhibitor 1                                                | -0.82 | ACCTTATCTTGCAGAAAGTAA  | NM_001493:    | NM_001493:                                                                                                                                   |
| 2668   | GDNF   | glial cell derived neurotrophic factor                                      | 0.00  | CGCGCTGACGAGTACTCAA    | NM_000514:    | NM_000514:                                                                                                                                   |
| 2668   | GDNF   | glial cell derived neurotrophic factor                                      | -1.51 | CTGGAGTTAATGTCCAACTA   | NM_000514:    | NM_000514:                                                                                                                                   |
| 79153  | GDPD3  | glycerophosphodiester phosphodiesterase domain containing 3                 | -2.04 | ACCCATGAGCGTAGAGATCAA  | NM_024307:    | NM_01031718:NM_024307:                                                                                                                       |
| 79153  | GDPD3  | glycerophosphodiester phosphodiesterase domain containing 3                 | -2.61 | CCGGACCTCCTAAGTCCAGAA  | NM_024307:    | NM_01031718:NM_024307:                                                                                                                       |
| 2669   | GEM    | GTP binding protein overexpressed in skeletal muscle                        | -0.84 | AACGATTACTCTGGATAT     | NM_181702:    | NM_181702:NM_005261:                                                                                                                         |
| 2669   | GEM    | GTP binding protein overexpressed in skeletal muscle                        | 1.28  | CAGCTCTGCTTATTTATT     | NM_181702:    | NM_181702:NM_005261:                                                                                                                         |
| 50628  | GEMIN4 | gem (nuclear organelle) associated protein 4                                | -0.96 | CAGCTGGACTTTACAGTTAT   | NM_015721:    | NM_015721:                                                                                                                                   |
| 50628  | GEMIN4 | gem (nuclear organelle) associated protein 4                                | -0.18 | CACCGCAAGTTGAACAGCTA   | NM_015721:    | NM_015721:                                                                                                                                   |
| 25929  | GEMIN5 | gem (nuclear organelle) associated protein 5                                | -0.26 | TCGAAATACGGCAACACGAA   | NM_015465:    | NM_015465:                                                                                                                                   |
| 25929  | GEMIN5 | gem (nuclear organelle) associated protein 5                                | -0.57 | CTGGTGAAGATTGTTATCTA   | NM_015465:    | NM_015465:                                                                                                                                   |
| 79833  | GEMIN6 | gem (nuclear organelle) associated protein 6                                | -1.30 | CAGGTGGCAATCATGAGTAA   | NM_024775:    | NM_024775:                                                                                                                                   |
| 79833  | GEMIN6 | gem (nuclear organelle) associated protein 6                                | -8.03 | ACCCACCATATGGTCCAGAAA  | NM_024775:    | NM_024775:                                                                                                                                   |
| 2672   | GF11   | growth factor independent 1                                                 | -0.66 | CGCGCTCATTTCTGCTCAA    | NM_005263:    | NM_005263:                                                                                                                                   |
| 2672   | GF11   | growth factor independent 1                                                 | 0.12  | TACAAGGTGGACAAATGCTAA  | NM_005263:    | NM_005263:                                                                                                                                   |
| 2674   | GFR11  | GDNF family receptor alpha 1                                                | 0.76  | ACCGCTGTGCCACCTTATA    | NM_005264:    | NM_005264:NM_145793:                                                                                                                         |
| 2674   | GFR11  | GDNF family receptor alpha 1                                                | 0.40  | ACCTCTGTATTTCCCAATGGTA | NM_005264:    | NM_005264:NM_145793:                                                                                                                         |
| 2675   | GFR12  | GDNF family receptor alpha 2                                                | 0.08  | TGGGTTTGACATGACACCTAA  | NM_001495:    | NM_001495:                                                                                                                                   |
| 2675   | GFR12  | GDNF family receptor alpha 2                                                | -0.12 | TAACAAGGTGATCAAACTAA   | NM_001495:    | NM_001495:                                                                                                                                   |
| 2676   | GFR13  | GDN GDNF family receptor alpha 3                                            | 0.28  | ACCGAGTACACAGAACTTAA   | NM_001496:    | NM_001496:                                                                                                                                   |
| 2676   | GFR13  | GDN GDNF family receptor alpha 3                                            | 0.75  | CTCCTGTGGCCCAAACTTAA   | NM_001496:    | NM_001496:                                                                                                                                   |
| 64096  | GFR14  | GDN GDNF family receptor alpha 4                                            | -2.76 | CTCGGATAGCACAGCCAGCTA  | NM_022139:    | NM_022139:NM_145763:NM_145762:                                                                                                               |
| 64096  | GFR14  | GDN GDNF family receptor alpha 4                                            | 1.11  | CCAGAATCTTAGGAAATGTTA  | NM_022139:    | NM_022139:NM_145763:NM_145762:                                                                                                               |
| 26088  | GGA1   | golgi : golgi associated, gamma adaptin ear containing, ARF binding protein | 0.31  | CAGGAAGATTGTGATCTTTGAA | NM_001001560: | NM_001001560:NM_013365:                                                                                                                      |
| 26088  | GGA1   | golgi : golgi associated, gamma adaptin ear containing, ARF binding protein | -0.93 | TCGGTGTGTCTCTTCACTAA   | NM_001001560: | NM_001001560:NM_013365:                                                                                                                      |
| 23163  | GGA3   | golgi associated, gamma adaptin ear containing, ARF binding protein         | 0.17  | CAGGGTGTCTGAGAAAGTAA   | NM_014001:    | NM_138619:NM_014001:                                                                                                                         |
| 23163  | GGA3   | golgi associated, gamma adaptin ear containing, ARF binding protein         | 0.55  | CACGTTAGAGGAAGTTAACAA  | NM_014001:    | NM_138619:NM_014001:                                                                                                                         |
| 2677   | GGCX   | gamma-glutamyl carboxylase                                                  | 0.15  | CAGGAAGAGTTAGACGCAAT   | NM_000821:    | NM_000821:                                                                                                                                   |
| 2677   | GGCX   | gamma-glutamyl carboxylase                                                  | -2.77 | CAGACCTTTCTAGACGCCAA   | NM_000821:    | NM_000821:                                                                                                                                   |
| 8836   | GGH    | gamma-glutamyl hydrolase (conjugase, folylpolyglutamylyl hydr               | -0.78 | CTGGCTGTGATCTCTTATTA   | NM_003878:    | NM_003878:                                                                                                                                   |
| 8836   | GGH    | gamma-glutamyl hydrolase (conjugase, folylpolyglutamylyl hydr               | 0.38  | TACGTCCAATTTACTCTGGAA  | NM_003878:    | NM_003878:                                                                                                                                   |
| 2688   | GH1    | growth hormone 1                                                            | 0.89  | AACAGCAAGTTCGACACAAAC  | NM_000515:    | NM_000515:NM_022559:NM_022560:NM_022561:NM_022562:                                                                                           |
| 2689   | GH2    | growth hormone 2                                                            | -0.14 | ACGCAGCAGAAATCTAACCTA  | NM_022556:    | NM_002059:NM_022558:NM_022557:NM_022556:                                                                                                     |
| 2689   | GH2    | growth hormone 2                                                            | -2.30 | CACCTGAAGACCTAGAGGAA   | NM_022556:    | NM_002059:NM_022558:NM_022557:NM_022556:                                                                                                     |
| 2690   | GHR    | growth hormone receptor                                                     | 1.06  | CAGCCTGACAACATTTCTATA  | NM_000163:    | NM_000163:                                                                                                                                   |
| 2690   | GHR    | growth hormone receptor                                                     | 1.21  | TAGAACCTAATCAATTCAAA   | NM_000163:    | NM_000163:                                                                                                                                   |
| 2691   | GHRH   | growth hormone releasing hormone                                            | -0.14 | CCCATACCGGTGTGCTTTAA   | NM_021081:    | NM_021081:                                                                                                                                   |
| 2691   | GHRH   | growth hormone releasing hormone                                            | 0.94  | CCCGGGCTACCTTAGCCAAA   | NM_021081:    | NM_021081:                                                                                                                                   |
| 2692   | GHRHR  | growth hormone releasing hormone receptor                                   | -3.14 | AAGGCTCAGAGGACCAATAA   | NM_000823:    | NM_000823:                                                                                                                                   |
| 2692   | GHRHR  | growth hormone releasing hormone receptor                                   | -0.79 | GCCAAATAACCTGTAAATGAA  | NM_000823:    | NM_000823:                                                                                                                                   |
| 51738  | GHRL   | ghrelin, growth hormone secretagogue receptor ligand                        | -0.02 | CGCCCGGAAGATGGAGTCAA   | NM_016362:    | NM_016362:                                                                                                                                   |
| 51738  | GHRL   | ghrelin, growth hormone secretagogue receptor ligand                        | 0.14  | CAGGAGGCGAATAAATGTTCA  | NM_016362:    | NM_016362:                                                                                                                                   |
| 2693   | GHSR   | growth hormone secretagogue receptor                                        | -1.48 | AACCACAAGCAAAACCGTAAA  | NM_004122:    | NM_198407:NM_004122:                                                                                                                         |
| 2693   | GHSR   | growth hormone secretagogue receptor                                        | 0.33  | AGGGACGAGAACCAAGCAAA   | NM_004122:    | NM_198407:NM_004122:                                                                                                                         |
| 2695   | GIP    | gastric ir gastric inhibitory polypeptide                                   | 1.50  | AACCAATAAAGTTTATGCTAA  | NM_004123:    | NM_004123:                                                                                                                                   |
| 2695   | GIP    | gastric ir gastric inhibitory polypeptide                                   | 1.70  | AACCAACCAATAAAGTTTA    | NM_004123:    | NM_004123:                                                                                                                                   |
| 10755  | GIPC1  | GIPC PDZ domain containing family, member 1                                 | -1.99 | CAGCGTGATCGACCACATCCA  | NM_005716:    | NM_202468:NM_202467:NM_202469:NM_202470:NM_202494:NM_005716:NM_202468:NM_202467:NM_202469:NM_202470:NM_202494:NM_005716:                     |
| 10755  | GIPC1  | GIPC PDZ domain containing family, member 1                                 | -0.16 | AGGCGGTACCTTCACGTGAA   | NM_005716:    | NM_000164:NM_000164:NM_000164:NM_000164:NM_014030:NM_014030:NM_014030:NM_014030:NM_057169:NM_014776:NM_057170:NM_057169:NM_014776:NM_057170: |
| 2696   | GIPR   | gastric inhibitory polypeptide receptor                                     | 0.52  | CAGGTGCATTTGGAGATTTCTA | NM_000164:    | NM_000164:                                                                                                                                   |
| 2696   | GIPR   | gastric inhibitory polypeptide receptor                                     | 0.08  | CTGGGAGCGCAACGAAATCAA  | NM_000164:    | NM_000164:                                                                                                                                   |
| 28964  | GIT1   | G prote G protein-coupled receptor kinase interactor 1                      | 1.48  | CAGCCTTGACTTATCCGAATT  | NM_014030:    | NM_014030:                                                                                                                                   |
| 28964  | GIT1   | G prote G protein-coupled receptor kinase interactor 1                      | 1.00  | GCCTGTGAGGATGCTCCGAAA  | NM_014030:    | NM_014030:                                                                                                                                   |
| 9815   | GIT2   | G protein-coupled receptor kinase interactor 2                              | -0.07 | AAGCATCTGGCAATAAGTAA   | NM_014776:    | NM_057169:NM_014776:NM_057170:                                                                                                               |
| 9815   | GIT2   | G protein-coupled receptor kinase interactor 2                              | 0.51  | CTGCCATGGCTGAAACTATA   | NM_014776:    | NM_057169:NM_014776:NM_057170:                                                                                                               |
| 2697   | GJA1   | gap junction protein, alpha 1, 43kDa (connexin 43)                          | -2.12 | ATGCTTAGAGTGGACTATTAA  | NM_000165:    | NM_000165:                                                                                                                                   |
| 2697   | GJA1   | gap junction protein, alpha 1, 43kDa (connexin 43)                          | 0.04  | CAGGGAATCAAGCCATGCTTA  | NM_000165:    | NM_000165:                                                                                                                                   |
| 2700   | GJA3   | gap junction protein, alpha 3, 46kDa (connexin 46)                          | -0.72 | ACCGGAGGACTTGGCCATCTA  | NM_021954:    | NM_021954:                                                                                                                                   |
| 2700   | GJA3   | gap junction protein, alpha 3, 46kDa (connexin 46)                          | -7.02 | CTGCGCTCCTGCTGCTCAA    | NM_021954:    | NM_021954:                                                                                                                                   |
| 2703   | GJA8   | gap junction protein, alpha 8, 50kDa (connexin 50)                          | -4.04 | TGGGAGAAGGTGCAAAAGCAA  | NM_005267:    | NM_005267:                                                                                                                                   |
| 2703   | GJA8   | gap junction protein, alpha 8, 50kDa (connexin 50)                          | -0.96 | CTCTGTGTCCCTATTTCTCAA  | NM_005267:    | NM_005267:                                                                                                                                   |
| 2705   | GJB1   | gap junction protein, beta 1, 32kDa (connexin 32, Charcot-Marie-Toot        | 0.72  | GCCTGAAATGTACACATTAA   | NM_000166:    | NM_000166:                                                                                                                                   |
| 2705   | GJB1   | gap junction protein, beta 1, 32kDa (connexin 32, Charcot-Marie-Toot        | 1.01  | TGCTGAAATGTACACATTAA   | NM_000166:    | NM_000166:                                                                                                                                   |
| 2706   | GJB2   | gap junction protein, beta 2, 26kDa (connexin 26)                           | -1.04 | TGGCCTCATGTCAAAATTTA   | NM_004004:    | NM_004004:                                                                                                                                   |
| 2706   | GJB2   | gap junction protein, beta 2, 26kDa (connexin 26)                           | 0.16  | CACAAGATTCTGACCTTTAAA  | NM_004004:    | NM_004004:                                                                                                                                   |
| 2707   | GJB3   | gap junction protein, beta 3, 31kDa (connexin 31)                           | -0.96 | CCCTGAGGACATAATGTGTA   | NM_024009:    | NM_024009:NM_001005752:                                                                                                                      |
| 2707   | GJB3   | gap junction protein, beta 3, 31kDa (connexin 31)                           | 0.97  | AACAAGCGAATTAACATCTA   | NM_024009:    | NM_024009:NM_001005752:                                                                                                                      |
| 10804  | GJB6   | gap junction protein, beta 6 (connexin 30)                                  | -0.14 | AGGTCTATCTGTGAAATATT   | NM_006783:    | NM_006783:                                                                                                                                   |
| 10804  | GJB6   | gap junction protein, beta 6 (connexin 30)                                  | 0.04  | AACAAGAGACTGCTTGACAAA  | NM_006783:    | NM_006783:                                                                                                                                   |
| 2710   | GK     | glycerol kinase                                                             | -0.30 | CCACCCTTAAGTGACATAAA   | NM_000167:    | NM_000167:NM_203391:                                                                                                                         |
| 2710   | GK     | glycerol kinase                                                             | 0.04  | CTGAGGTAGCCATTTATAA    | NM_000167:    | NM_000167:NM_203391:                                                                                                                         |
| 2712   | GK2    | glycerol kinase 2                                                           | 0.00  | CTCGGGTGTGCCATAATAA    | NM_033214:    | NM_033214:                                                                                                                                   |
| 2712   | GK2    | glycerol kinase 2                                                           | 0.05  | TACGTTAGAAGAGCACTGTA   | NM_033214:    | NM_033214:                                                                                                                                   |
| 80318  | GKAP1  | G kinase anchoring protein 1                                                | -0.43 | AACGCTCAACATGATCTTCCA  | NM_025211:    | NM_025211:                                                                                                                                   |
| 80318  | GKAP1  | G kinase anchoring protein 1                                                | 0.01  | CATGCTGTTTTGTAACGCTCAA | NM_025211:    | NM_025211:                                                                                                                                   |
| 2717   | GLA    | galactosidase, alpha                                                        | -0.59 | CAAGGTTAAGAAGTCACTAA   | NM_000169:    | NM_000169:                                                                                                                                   |
| 2717   | GLA    | galactosidase, alpha                                                        | 1.51  | TTGGTGGACCTCGCTTTATA   | NM_000169:    | NM_000169:                                                                                                                                   |
| 2720   | GLB1   | galactosidase, beta 1                                                       | 0.36  | CACCAAGTTGCAATATGGAA   | NM_000404:    | NM_000404:                                                                                                                                   |

|       |         |                                                                                 |        |                        |            |                                                  |
|-------|---------|---------------------------------------------------------------------------------|--------|------------------------|------------|--------------------------------------------------|
| 2720  | GLB1    | galactose galactosidase, beta 1                                                 | -1.57  | ACCACTGATGGAGCACATAAA  | NM_000404: | NM_000404:                                       |
| 2731  | GLDC    | glycine dehydrogenase (decarboxylating; glycine decarboxylase, glycyl)          | -0.02  | CTCTGTCAAGGTAATGTAAA   | NM_000170: | NM_000170:                                       |
| 2731  | GLDC    | glycine dehydrogenase (decarboxylating; glycine decarboxylase, glycyl)          | -2.38  | AACTGCGATTTAAATGCCAA   | NM_000170: | NM_000170:                                       |
| 2734  | GLG1    | golgi apparatus protein 1                                                       | -1.33  | CCGCTTGGAGCCAGATCTATA  | NM_012201: | NM_012201:                                       |
| 2734  | GLG1    | golgi apparatus protein 1                                                       | -2.49  | CCGGATTGAGATGTGGAGTTA  | NM_012201: | NM_012201:                                       |
| 2735  | GLI1    | glioma-associated oncogene homolog 1 (zinc finger protein)                      | -2.81  | CCAGCCAGATGAATCCACCAA  | NM_005269: | NM_005269:                                       |
| 2735  | GLI1    | glioma-associated oncogene homolog 1 (zinc finger protein)                      | -0.56  | CTCGGGACCATTCCATTCTA   | NM_005269: | NM_005269:                                       |
| 2736  | GLI2    | GLI-Kruppel family member GLI2                                                  | 1.80   | ATGAATGAATAAAGTATGTAA  | NM_005270: | NM_005270:NM_030380:NM_030381:NM_030379:         |
| 2736  | GLI2    | GLI-Kruppel family member GLI2                                                  | -0.08  | CAAGTATATATGAATGAATA   | NM_005270: | NM_005270:NM_030380:NM_030381:NM_030379:         |
| 2737  | GLI3    | GLI-Kruppel family member GLI3 (Greig cephalopolysyndactyly syndr               | 0.02   | CACCATATAAATAACGACCAT  | NM_000168: | NM_000168:                                       |
| 2737  | GLI3    | GLI-Kruppel family member GLI3 (Greig cephalopolysyndactyly syndr               | -0.10  | CAGCTTGTGCACCATATAAAT  | NM_000168: | NM_000168:                                       |
| 11146 | GLMN    | glomulin, FKBP associated protein                                               | -1.26  | AAGGCATTTCAATGGATTA    | NM_007070: | NM_053274:NM_007070:                             |
| 11146 | GLMN    | glomulin, FKBP associated protein                                               | 0.84   | GAGGAAGCTCAGTCTATAATA  | NM_007070: | NM_053274:NM_007070:                             |
| 2740  | GLP1R   | glucagon-like peptide 1 receptor                                                | -4.84  | CAGCGCTGTTGCGTAAGTCA   | NM_002062: | NM_002062:                                       |
| 2740  | GLP1R   | glucagon-like peptide 1 receptor                                                | -0.08  | CCAGACAGAGCCGCAATCAA   | NM_002062: | NM_002062:                                       |
| 9340  | GLP2R   | glucagon-like peptide 2 receptor                                                | -0.01  | ATCACTGATGATCAAGTTGAA  | NM_004246: | NM_004246:                                       |
| 9340  | GLP2R   | glucagon-like peptide 2 receptor                                                | 0.06   | CACAGGGTGTGGACAACAAA   | NM_004246: | NM_004246:                                       |
| 2741  | GLRA1   | glycine receptor, alpha 1 (startle disease/hyperekplexia, stiff man sync        | -0.95  | CGCCTTAACTTCTCGCCTA    | NM_000171: | NM_000171:                                       |
| 2741  | GLRA1   | glycine receptor, alpha 1 (startle disease/hyperekplexia, stiff man sync        | 0.47   | TGGGATTTCCTGGATAAGTCA  | NM_000171: | NM_000171:                                       |
| 2742  | GLRA2   | glycine receptor, alpha 2                                                       | -0.16  | TAGGTGTAAGTACTAGTCTA   | NM_002063: | NM_002063:                                       |
| 2742  | GLRA2   | glycine receptor, alpha 2                                                       | 0.94   | ATAGTGTACCCTCTTAATAAA  | NM_002063: | NM_002063:                                       |
| 8001  | GLRA3   | glycylglycine receptor, alpha 3                                                 | 1.25   | TCGTTTACAGTCACAATCTA   | NM_006529: | NM_006529:                                       |
| 8001  | GLRA3   | glycylglycine receptor, alpha 3                                                 | 0.25   | AATGATGACCATTTGATTTAA  | NM_006529: | NM_006529:                                       |
| 2743  | GLRB    | glycylglycine receptor, beta                                                    | 0.38   | TTCAAGTGTGTAAGTCAAGT   | NM_000824: | NM_000824:                                       |
| 2743  | GLRB    | glycylglycine receptor, beta                                                    | -1.08  | AAGCGAATTTGATCTTTATGCA | NM_000824: | NM_000824:                                       |
| 2745  | GLRX    | glutaredoxin (thioltransferase)                                                 | -0.48  | CACCAAGAGTGTATCTGTGAA  | NM_002064: | NM_002064:                                       |
| 2745  | GLRX    | glutaredoxin (thioltransferase)                                                 | -0.18  | CTCCTTCCACAAATGATGAA   | NM_002064: | NM_002064:                                       |
| 29998 | GLTSCR1 | (glioma tumor suppressor candidate region gene 1                                | -5.06  | CGCATCGGGCTCAAGCTCAA   | NM_015711: | NM_015711:                                       |
| 29998 | GLTSCR1 | (glioma tumor suppressor candidate region gene 1                                | -0.63  | CGGGCTCAAGCTCAAGTCAA   | NM_015711: | NM_015711:                                       |
| 29997 | GLTSCR2 | glioma tumor suppressor candidate region gene 2                                 | -1.69  | CGGGAGCTTCCATAAATCCAT  | NM_015710: | NM_015710:                                       |
| 29997 | GLTSCR2 | glioma tumor suppressor candidate region gene 2                                 | -0.40  | CTGACAAAGAGAGAACCCAAA  | NM_015710: | NM_015710:                                       |
| 2746  | GLUD1   | glutamate dehydrogenase 1                                                       | 0.30   | CAGAATTTGGTACCATAAAT   | NM_005271: | NM_005271:                                       |
| 2746  | GLUD1   | glutamate dehydrogenase 1                                                       | 0.61   | CCTATAGAAATAATAAATGAA  | NM_005271: | NM_005271:                                       |
| 2760  | GM2A    | GM2 ganglioside activator                                                       | -0.93  | CACCCGTGTACATACATAACAA | NM_000405: | NM_000405:                                       |
| 2760  | GM2A    | GM2 ganglioside activator                                                       | 0.01   | AAAGATGCTATTACAATGTAA  | NM_000405: | NM_000405:                                       |
| 2762  | GMDS    | GDP-mannose 4,6-dehydratase                                                     | 0.69   | CGGTCAGTAGCTAAGATTTA   | NM_001500: | NM_001500:                                       |
| 2762  | GMDS    | GDP-mannose 4,6-dehydratase                                                     | 0.70   | GAAAGATCATTAAATGAAGTAA | NM_001500: | NM_001500:                                       |
| 10691 | GMEB1   | glucocorticoid modulatory element binding protein 1                             | -0.35  | CGGCCTAACCTCGGCAATTTCA | NM_006582: | NM_006582:NM_024482:                             |
| 10691 | GMEB1   | glucocorticoid modulatory element binding protein 1                             | -0.45  | TCGGCAATTCAGGCTGTTGAA  | NM_006582: | NM_006582:NM_024482:                             |
| 26205 | GMEB2   | glucocorticoid modulatory element binding protein 2                             | -0.33  | CACAACAGCTTCAGAAATTA   | NM_012384: | NM_012384:                                       |
| 26205 | GMEB2   | glucocorticoid modulatory element binding protein 2                             | -0.11  | CTAGGAAGAGTCAGATTATA   | NM_012384: | NM_012384:                                       |
| 51291 | GMIP    | (GEM II) GEM interacting protein                                                | -0.11  | CAGAGGGTTCCTATAAGGAAA  | NM_016573: | NM_016573:                                       |
| 51291 | GMIP    | (GEM II) GEM interacting protein                                                | -0.81  | CCAGAGGGTTCCTATAAGGAAA | NM_016573: | NM_016573:                                       |
| 2765  | GML     | GPI anchored molecule like protein                                              | -2.93  | AAGGACATGTTACCAGGATGA  | NM_002066: | NM_002066:                                       |
| 2765  | GML     | GPI anchored molecule like protein                                              | -1.23  | CTCCTCAGGTGGCCCATTTA   | NM_002066: | NM_002066:                                       |
| 51053 | GMNN    | geminin, DNA replication inhibitor                                              | -0.13  | AAGAACTGTATCTTCCCTCA   | NM_015895: | NM_015895:                                       |
| 51053 | GMNN    | geminin, DNA replication inhibitor                                              | 0.04   | ACCCTATTGCATTAAGATACA  | NM_015895: | NM_015895:                                       |
| 2766  | GMPR    | (guanosine monophosphate reductase                                              | 0.84   | TCGGAGCAGATATCATCAAA   | NM_006877: | NM_006877:                                       |
| 2766  | GMPR    | (guanosine monophosphate reductase                                              | -0.04  | CTCCATGTTTACAGCAATTTCA | NM_006877: | NM_006877:                                       |
| 51292 | GMPR2   | guanosine monophosphate reductase 2                                             | -1.46  | AAGATGCTGATTGGTACATAA  | NM_016576: | NM_016576:NM_001002000:NM_001002002:NM_01002001: |
| 51292 | GMPR2   | guanosine monophosphate reductase 2                                             | -0.79  | ATGCCATATTGACAAAGCTA   | NM_016576: | NM_016576:NM_001002000:NM_001002002:NM_01002001: |
| 2768  | GNA12   | guanine nucleotide binding protein (G protein), alpha 12                        | -2.80  | CGGGATCGGCCAGCTGAATTA  | NM_007353: | NM_007353:                                       |
| 2768  | GNA12   | guanine nucleotide binding protein (G protein), alpha 12                        | 1.20   | GAGGTAGTTTGGCTCAATTA   | NM_007353: | NM_007353:                                       |
| 10672 | GNA13   | guanine nucleotide binding protein (G protein), alpha 13                        | 0.85   | CACCAAATAGATATCATGTTA  | NM_006572: | NM_006572:                                       |
| 10672 | GNA13   | guanine nucleotide binding protein (G protein), alpha 13                        | -1.46  | CCGCACTGCTTACCAAAATTA  | NM_006572: | NM_006572:                                       |
| 9630  | GNA14   | (guan) guanine nucleotide binding protein (G protein), alpha 14                 | 0.37   | AGGGAATTCACCTTGTCTATA  | NM_004297: | NM_004297:                                       |
| 9630  | GNA14   | (guan) guanine nucleotide binding protein (G protein), alpha 14                 | -0.38  | ATGTTGGATGTTGGTGGCCAA  | NM_004297: | NM_004297:                                       |
| 2769  | GNA15   | guanine nucleotide binding protein (G protein), alpha 15 (Gq class)             | 0.81   | TCGGTGGGGCTGAAATTTAA   | NM_002068: | NM_002068:                                       |
| 2769  | GNA15   | guanine nucleotide binding protein (G protein), alpha 15 (Gq class)             | -1.73  | CCGGTTTGGGACGAGAGAAA   | NM_002068: | NM_002068:                                       |
| 2770  | GNA11   | guanine nucleotide binding protein (G protein), alpha inhibiting activity       | 1.15   | CACGTTAGATTTGGTTTGAAA  | NM_002069: | NM_002069:                                       |
| 2770  | GNA11   | guanine nucleotide binding protein (G protein), alpha inhibiting activity       | 0.74   | AAGGACCTTTCTTAAATGTGA  | NM_002069: | NM_002069:                                       |
| 2771  | GNA12   | guanine nucleotide binding protein (G protein), alpha inhibiting activity       | 0.43   | CAGCCCAAGTCCAATGTTTA   | NM_002070: | NM_002070:                                       |
| 2771  | GNA12   | guanine nucleotide binding protein (G protein), alpha inhibiting activity       | -3.94  | CCGGCGGTTGCTACAGCAA    | NM_002070: | NM_002070:                                       |
| 2773  | GNA13   | guanine nucleotide binding protein (G protein), alpha inhibiting activity       | 0.33   | AAAGTGTGATCGATCGTCAA   | NM_006496: | NM_006496:                                       |
| 2773  | GNA13   | guanine nucleotide binding protein (G protein), alpha inhibiting activity       | 0.77   | AAGTGTGTTGTAAGGTTTAA   | NM_006496: | NM_006496:                                       |
| 2774  | GNA1    | (guan) guanine nucleotide binding protein (G protein), alpha activating activit | -0.45  | CACCGGTGACGGCAACATTTA  | NM_002071: | NM_002071:NM_182978:                             |
| 2774  | GNA1    | (guan) guanine nucleotide binding protein (G protein), alpha activating activit | -0.30  | ACGCCTGCTGTAATCGGAAA   | NM_002071: | NM_002071:                                       |
| 2775  | GNAO1   | guanine nucleotide binding protein (G protein), alpha activating activit        | 0.15   | AACAAGAAGACATATTGAAA   | NM_138736: | NM_138736:                                       |
| 2775  | GNAO1   | guanine nucleotide binding protein (G protein), alpha activating activit        | 0.29   | ACGACGCTCATCATCGCCAAA  | NM_138736: | NM_138736:                                       |
| 2776  | GNAQ    | guanine nucleotide binding protein (G protein), q polypeptide                   | 1.11   | CAGGACACATCGTTGATTTA   | NM_002072: | NM_002072:                                       |
| 2776  | GNAQ    | guanine nucleotide binding protein (G protein), q polypeptide                   | 0.07   | CAGGAATGCTATGATGACGA   | NM_002072: | NM_002072:                                       |
| 2778  | GNAS    | GNAS complex locus                                                              | -0.15  | AGGGCATGATTAACAAGCAA   | NM_000516: | NM_000516:NM_080426:NM_080425:NM_016592:         |
| 2778  | GNAS    | GNAS complex locus                                                              | 0.18   | CCAAATTTAATAAAGCCTTA   | NM_000516: | NM_000516:NM_080426:NM_080425:NM_016592:         |
| 2779  | GNAT1   | guanine nucleotide binding protein (G protein), alpha transducing activ         | -0.61  | ACGGCCATGACCCACACTCAA  | NM_000172: | NM_000172:NM_144499:                             |
| 2779  | GNAT1   | guanine nucleotide binding protein (G protein), alpha transducing activ         | -1.69  | CAGCATCTGTTCCCGGACTA   | NM_000172: | NM_000172:NM_144499:                             |
| 2780  | GNAT2   | guanine nucleotide binding protein (G protein), alpha transducing activ         | 0.32   | TGGGATAGCTATTGGAGCTTA  | NM_005272: | NM_005272:                                       |
| 2780  | GNAT2   | guanine nucleotide binding protein (G protein), alpha transducing activ         | -0.12  | AACCAATTAGAACAATTTACA  | NM_005272: | NM_005272:                                       |
| 2781  | GNAZ    | (guan) guanine nucleotide binding protein (G protein), alpha z polypeptide      | 0.02   | CGGGACACGCTGTTGATCAATA | NM_002073: | NM_002073:                                       |
| 2781  | GNAZ    | (guan) guanine nucleotide binding protein (G protein), alpha z polypeptide      | 1.06   | AGGGCCGTGTGAAATACGAA   | NM_002073: | NM_002073:                                       |
| 54584 | GNB1L   | guanine nucleotide binding protein (G protein), beta polypeptide 1-like         | -11.10 | CAGGTGCGTGGGACTCATGAA  | NM_053004: | NM_053004:                                       |
| 54584 | GNB1L   | guanine nucleotide binding protein (G protein), beta polypeptide 1-like         | -5.43  | CAGCCTTGGCCCTGAAACCTCA | NM_053004: | NM_053004:                                       |
| 10399 | GNB2L1  | guanine nucleotide binding protein (G protein), beta polypeptide 2-like         | 0.03   | TTGGCACACGCTAGAAGTTTA  | NM_006098: | NM_006098:                                       |
| 10399 | GNB2L1  | guanine nucleotide binding protein (G protein), beta polypeptide 2-like         | -0.67  | CCCGAGTTCCCGGACATGAT   | NM_006098: | NM_006098:                                       |
| 2784  | GNB3    | (guan) guanine nucleotide binding protein (G protein), beta polypeptide 3       | 0.74   | TCCCTTAATGAGCAAGGACAA  | NM_002075: | NM_002075:                                       |
| 2784  | GNB3    | (guan) guanine nucleotide binding protein (G protein), beta polypeptide 3       | -0.46  | TCGGGTGCCATTCCCACTAA   | NM_002075: | NM_002075:                                       |
| 59345 | GNB4    | (guan) guanine nucleotide binding protein (G protein), beta polypeptide 4       | 0.52   | CTGCTCTATATAACTTAA     | NM_021629: | NM_021629:                                       |
| 59345 | GNB4    | (guan) guanine nucleotide binding protein (G protein), beta polypeptide 4       | 1.51   | TACGATGACTTTAATTTGTAAT | NM_021629: | NM_021629:                                       |
| 10681 | GNB5    | guanine nucleotide binding protein (G protein), beta 5                          | 0.33   | TAGAAGCAAAATCCAAATTTCA | NM_006578: | NM_006578:NM_016194:                             |
| 10681 | GNB5    | guanine nucleotide binding protein (G protein), beta 5                          | 0.36   | TTAAGGTTATTCTAAATTTA   | NM_006578: | NM_006578:NM_016194:                             |
| 10020 | GNE     | glucosamine (UDP-N-acetyl)-2-epimerase/N-acetylmannosamine kina                 | 1.55   | ATGGAATACATATCGAATGA   | NM_005476: | NM_005476:                                       |
| 10020 | GNE     | glucosamine (UDP-N-acetyl)-2-epimerase/N-acetylmannosamine kina                 | 1.98   | CCCGATCATGTTGGCATTAA   | NM_005476: | NM_005476:                                       |
| 2791  | GNG11   | guanine nucleotide binding protein (G protein), gamma 11                        | -0.11  | CAGAGAGTATCAGATGTACAA  | NM_004126: | NM_004126:                                       |
| 2791  | GNG11   | guanine nucleotide binding protein (G protein), gamma 11                        | -3.49  | CTGGAGAGGATCCTCTAGTAA  | NM_004126: | NM_004126:                                       |

|        |         |                                                                      |       |                         |            |                                                  |
|--------|---------|----------------------------------------------------------------------|-------|-------------------------|------------|--------------------------------------------------|
| 55970  | GNG12   | guanine nucleotide binding protein (G protein), gamma 12             | 0.37  | TCCGATATGTCAGGACCTAAA   | NM_018841: | NM_018841:                                       |
| 55970  | GNG12   | guanine nucleotide binding protein (G protein), gamma 12             | 1.07  | TAGCATGTTCACAGATTGAAA   | NM_018841: | NM_018841:                                       |
| 51764  | GNG13   | guanine nucleotide binding protein (G protein), gamma 13             | 1.11  | CACGTGATTCACAGCTGTGAAA  | NM_016541: | NM_016541:                                       |
| 51764  | GNG13   | guanine nucleotide binding protein (G protein), gamma 13             | 0.59  | CCCACTCACAAACATCTTGAAA  | NM_016541: | NM_016541:                                       |
| 54331  | GNG2    | guanine nucleotide binding protein (G protein), gamma 2              | 0.11  | TACAGTTAGGACGCCCATGAAA  | NM_053064: | NM_053064:                                       |
| 54331  | GNG2    | guanine nucleotide binding protein (G protein), gamma 2              | 0.22  | CTCCTAGTTAATAGTGATATA   | NM_053064: | NM_053064:                                       |
| 2785   | GNG3    | guanine nucleotide binding protein (G protein), gamma 3              | -0.02 | CAAGATGGTGGAAACAGCTTAA  | NM_012202: | NM_012202:                                       |
| 2785   | GNG3    | guanine nucleotide binding protein (G protein), gamma 3              | 0.73  | GTGGAACAGCTTAAGATTGAAA  | NM_012202: | NM_012202:                                       |
| 2786   | GNG4    | guanine nucleotide binding protein (G protein), gamma 4              | 0.90  | AAGTCTGGACTTAAGAGTTTAA  | NM_004485: | NM_004485:                                       |
| 2786   | GNG4    | guanine nucleotide binding protein (G protein), gamma 4              | 1.41  | CAAGTTTATATCATATTAATA   | NM_004485: | NM_004485:                                       |
| 2788   | GNG7    | guanine nucleotide binding protein (G protein), gamma 7              | 0.62  | ACGCATCCATCCTCCAAAGTTAA | NM_052847: | NM_052847:                                       |
| 2788   | GNG7    | guanine nucleotide binding protein (G protein), gamma 7              | -0.24 | ACGGCTAAACTCGGATTGTGAA  | NM_052847: | NM_052847:                                       |
| 94235  | GNG8    | guanine nucleotide binding protein (G protein), gamma 8              | -4.01 | ACAGCTGAAGCTGGAGGTGAAA  | NM_033258: | NM_033258:                                       |
| 94235  | GNG8    | guanine nucleotide binding protein (G protein), gamma 8              | -5.33 | CAAGACGGTGGAAACAGCTGAAA | NM_033258: | NM_033258:                                       |
| 2792   | GNGT1   | guanine nucleotide binding protein (G protein), gamma transducing ac | -3.40 | AAGAGAGAGAGCTCATATGAAA  | NM_021955: | NM_021955:                                       |
| 2792   | GNGT1   | guanine nucleotide binding protein (G protein), gamma transducing ac | -2.49 | AGGCTGTGTGATTTGATAATA   | NM_021955: | NM_021955:                                       |
| 2793   | GNGT2   | guanine nucleotide binding protein (G protein), gamma transducing ac | 0.70  | AACACAAGCATCTGGTTTAA    | NM_031498: | NM_031498:                                       |
| 2793   | GNGT2   | guanine nucleotide binding protein (G protein), gamma transducing ac | 0.43  | CAACAAGAGTTTGTGAAGTTAA  | NM_031498: | NM_031498:                                       |
| 27232  | GNMT    | glycylglycine N-methyltransferase                                    | 0.11  | GACGGAAGGTTAAACAATATA   | NM_018960: | NM_018960:                                       |
| 27232  | GNMT    | glycylglycine N-methyltransferase                                    | -2.23 | CAGACGGAAGGTTAAACAATA   | NM_018960: | NM_018960:                                       |
| 8443   | GNPAT   | glyceronephosphate O-acyltransferase                                 | 1.18  | CACGTAATTAAGTCTCATCGAA  | NM_014236: | NM_014236:                                       |
| 8443   | GNPAT   | glyceronephosphate O-acyltransferase                                 | -1.01 | CTCGATCAAGGTCACTCTCAA   | NM_014236: | NM_014236:                                       |
| 2796   | GNRH1   | gonadotropin-releasing hormone 1 (luteinizing-releasing hormone)     | -0.36 | ACCATTACTAACATGACTTAA   | NM_000825: | NM_000825:                                       |
| 2796   | GNRH1   | gonadotropin-releasing hormone 1 (luteinizing-releasing hormone)     | 0.98  | GACCATTTACTACATGACTTAA  | NM_000825: | NM_000825:                                       |
| 2797   | GNRH2   | gonadotropin-releasing hormone 2                                     | -2.15 | CCAGTGGTCCCTTCACAGGAAA  | NM_001501: | NM_178332:NM_001501:NM_178331:                   |
| 2797   | GNRH2   | gonadotropin-releasing hormone 2                                     | -3.10 | CTGGAGGAAAGCCGAGCCCTCAA | NM_001501: | NM_178332:NM_001501:NM_178331:                   |
| 2798   | GNRHR   | gonadotropin-releasing hormone receptor                              | -2.38 | AAGCATGGATTGGATCAGTAAA  | NM_000406: | NM_0001012763:NM_000406:                         |
| 2798   | GNRHR   | gonadotropin-releasing hormone receptor                              | 0.71  | ACGGTTGCATTTGCCACTTCAA  | NM_000406: | NM_0001012763:NM_000406:                         |
| 114814 | GNRHR2  | gonadotropin-releasing hormone (type 2) receptor 2                   | -0.02 | CGCCGAGGACGAGTACTCAA    | NM_057163: | NR_002328:                                       |
| 114814 | GNRHR2  | gonadotropin-releasing hormone (type 2) receptor 2                   | -0.22 | TCCGTTTCAGGTGAAGGAAA    | NM_057163: | NR_002328:                                       |
| 2799   | GNS     | glucosamine (N-acetyl)-6-sulfatase (Sanfilippo disease IIID)         | 0.18  | ATCAGTCAACTTCCACATTTAA  | NM_002076: | NM_002076:                                       |
| 2799   | GNS     | glucosamine (N-acetyl)-6-sulfatase (Sanfilippo disease IIID)         | -0.22 | AAGCAAGATGCTGGTTGCCAAA  | NM_002076: | NM_002076:                                       |
| 9950   | GOLGA5  | golgi autoantigen, golgin subfamily a, 5                             | -1.90 | CACGACCAACCATATGGCAAAA  | NM_005113: | NM_005113:                                       |
| 9950   | GOLGA5  | golgi autoantigen, golgin subfamily a, 5                             | -0.40 | AAGAAGATCTTTATCGAAGAAA  | NM_005113: | NM_005113:                                       |
| 26003  | GORASP2 | golgi reassembly stacking protein 2, 55kDa                           | -0.67 | CAGTATGTCCACGCTCTTTTAA  | NM_015530: | NM_015530:                                       |
| 26003  | GORASP2 | golgi reassembly stacking protein 2, 55kDa                           | -0.36 | ATGGCTAATCTTCCACACGGAAA | NM_015530: | NM_015530:                                       |
| 9527   | GOSR1   | golgi SNAP receptor complex member 1                                 | 0.96  | CACGTGGTATTATAGTATT     | NM_004871: | NM_004871:NM_001007024:NM_001007025:             |
| 9527   | GOSR1   | golgi SNAP receptor complex member 1                                 | -0.62 | CATGATAGTGTGAAGGCTAAA   | NM_004871: | NM_004871:NM_001007024:NM_001007025:             |
| 9570   | GOSR2   | golgi SNAP receptor complex member 2                                 | -0.19 | AACGAAATCCACAGCAAGCATA  | NM_004287: | NM_001012511:NM_054022:NM_004287:                |
| 9570   | GOSR2   | golgi SNAP receptor complex member 2                                 | -1.83 | CAGCATTCCACAGCCGTGCAA   | NM_004287: | NM_004287:                                       |
| 2811   | GP1BA   | glycoprotein Ib (platelet), alpha polypeptide                        | -1.78 | ATGCATCTATGCACAGAAAGAA  | NM_000173: | NM_000173:                                       |
| 2811   | GP1BA   | glycoprotein Ib (platelet), alpha polypeptide                        | -0.61 | CTGAACCTGTATCAGCCACAAA  | NM_000173: | NM_000173:                                       |
| 2812   | GP1BB   | glycoprotein Ib (platelet), beta polypeptide                         | 0.89  | ACGAGTCTGAGGAGAGAAA     | NM_000407: | NM_000407:                                       |
| 2812   | GP1BB   | glycoprotein Ib (platelet), beta polypeptide                         | -2.78 | CTGGGCAACACGGGCTGCGAAA  | NM_000407: | NM_000407:                                       |
| 2813   | GP2     | glycoprotein 2 (zymogen granule membrane)                            | -2.96 | CAGGACCTCAATAGTTCTGAT   | NM_001502: | NM_001007240:NM_001502:NM_001007241:NM_01007242: |
| 2813   | GP2     | glycoprotein 2 (zymogen granule membrane)                            | 0.11  | CCAGAAGTACACGAATCCTTAA  | NM_001502: | NM_001007240:NM_001502:NM_001007241:NM_01007242: |
| 2814   | GP5     | glycoprotein V (platelet)                                            | -0.30 | ACGGGCAAGGTCAGATCAT     | NM_004488: | NM_004488:                                       |
| 2814   | GP5     | glycoprotein V (platelet)                                            | 1.43  | ATCGTGTTCGTATGATTAAA    | NM_004488: | NM_004488:                                       |
| 51206  | GP6     | glycoprotein VI (platelet)                                           | 0.35  | CCAGGACCGGTGATTCACAAA   | NM_016363: | NM_016363:                                       |
| 51206  | GP6     | glycoprotein VI (platelet)                                           | 0.30  | CCCGTTCCTTCACATAGAAA    | NM_016363: | NM_016363:                                       |
| 2815   | GP9     | glycoprotein IX (platelet)                                           | 0.26  | TACGGTTCACAGACAGTTAA    | NM_000174: | NM_000174:                                       |
| 2815   | GP9     | glycoprotein IX (platelet)                                           | 0.02  | CCACCAGAAGCCAGAAATAAAA  | NM_000174: | NM_000174:                                       |
| 10223  | GPA33   | glycoprotein A33 (transmembrane)                                     | -0.06 | CAGGATGATTTCCACCCAAA    | NM_005814: | NM_005814:                                       |
| 10223  | GPA33   | glycoprotein A33 (transmembrane)                                     | -0.72 | CCCATCTAGTGGGCACTTAA    | NM_005814: | NM_005814:                                       |
| 151306 | GPBAR1  | G protein-coupled bile acid receptor 1                               | -3.68 | AAGCCTCATCACCAGCCAAA    | NM_170699: | NM_170699:                                       |
| 151306 | GPBAR1  | G protein-coupled bile acid receptor 1                               | -8.49 | CAGGACCAAGATGACGCCAAA   | NM_170699: | NM_170699:                                       |
| 2817   | GPC1    | glypican 1                                                           | 0.08  | CGCCAGATCTACGGAGCCAAA   | NM_002081: | NM_002081:                                       |
| 2817   | GPC1    | glypican 1                                                           | 1.24  | TACAACACAGACGATATTTTAA  | NM_002081: | NM_002081:                                       |
| 221914 | GPC2    | glypican 2 (cerebroglycan)                                           | 0.00  | CTGCAAAATAATGGTAATGTA   | NM_152742: | NM_152742:                                       |
| 221914 | GPC2    | glypican 2 (cerebroglycan)                                           | 0.62  | CATGTTTATCTGCAAAATAAAA  | NM_152742: | NM_152742:                                       |
| 2719   | GPC3    | glypican 3                                                           | 1.26  | GTCAGTCAAAATTTGACAAA    | NM_004484: | NM_004484:                                       |
| 2719   | GPC3    | glypican 3                                                           | 1.03  | CCAGTGGTCAGTCAAATTTAA   | NM_004484: | NM_004484:                                       |
| 2239   | GPC4    | glypican 4                                                           | -4.05 | TAGGTAGAGCTGAGAATACTA   | NM_001448: | NM_001448:                                       |
| 2239   | GPC4    | glypican 4                                                           | 0.70  | TACCAAATGATAGCTATAAAA   | NM_001448: | NM_001448:                                       |
| 10082  | GPC6    | glypican 6                                                           | -1.12 | CCGGTGTTCACAGACATAAAA   | NM_005708: | NM_005708:                                       |
| 10082  | GPC6    | glypican 6                                                           | -0.01 | CTAGAGAGAAATCTTACTCAA   | NM_005708: | NM_005708:                                       |
| 2820   | GP2     | glycerol-3-phosphate dehydrogenase 2 (mitochondrial)                 | 1.45  | CAGATAGCATGTGTTATTTAAA  | NM_000408: | NM_000408:                                       |
| 2820   | GP2     | glycerol-3-phosphate dehydrogenase 2 (mitochondrial)                 | 0.45  | CAGGAAGTTTCTATATATGAA   | NM_000408: | NM_000408:                                       |
| 122876 | GPHB5   | glycoprotein hormone beta 5                                          | -1.53 | TGATCGAGTCTGTACCTAGAAA  | NM_145171: | NM_145171:                                       |
| 122876 | GPHB5   | glycoprotein hormone beta 5                                          | -0.92 | GGGAGTTTACTTTCTGCGGCAA  | NM_145171: | NM_145171:                                       |
| 10243  | GPHN    | gephyrin                                                             | -0.41 | CCGCAGTGGGATAAATCTCAA   | NM_020806: | NM_020806:NM_001024218:                          |
| 10243  | GPHN    | gephyrin                                                             | 0.56  | CCCATCGGCCATGACATTTAAA  | NM_020806: | NM_020806:NM_001024218:                          |
| 2821   | GPI     | glucose phosphate isomerase                                          | -2.25 | CGCGCTGTGGTATGTCTCCAAA  | NM_000175: | NM_000175:                                       |
| 2821   | GPI     | glucose phosphate isomerase                                          | -0.62 | GAGTTTGGAAATGACCCCTCAA  | NM_000175: | NM_000175:                                       |
| 2822   | GPLD1   | glycosylphosphatidylinositol specific phospholipase D1               | 1.21  | CGGCCGAGTATATGATATAAA   | NM_001503: | NM_001503:                                       |
| 2822   | GPLD1   | glycosylphosphatidylinositol specific phospholipase D1               | 0.53  | TACGTACGATGAGCTGTCTAAA  | NM_001503: | NM_001503:                                       |
| 10457  | GNPMB   | glycoprotein (transmembrane) nmb                                     | 0.52  | TCCATGTAATGATGATATAAA   | NM_002510: | NM_001005340:NM_002510:                          |
| 10457  | GNPMB   | glycoprotein (transmembrane) nmb                                     | 0.04  | CTACTATTGATTAGAGCCTAAA  | NM_002510: | NM_001005340:NM_002510:                          |
| 2825   | GPR1    | G prot G protein-coupled receptor 1                                  | -0.35 | AAGCCTTAAGTCTTAATATTA   | NM_005279: | NM_005279:                                       |
| 2825   | GPR1    | G prot G protein-coupled receptor 1                                  | 0.26  | CGACTCCACTTTTCATAGTTAA  | NM_005279: | NM_005279:                                       |
| 83550  | GPR101  | G protein-coupled receptor 101                                       | -5.82 | CAGCTTGAAGTGGAGTGCACA   | NM_054021: | NM_054021:                                       |
| 83550  | GPR101  | G protein-coupled receptor 101                                       | -0.76 | CCGCGTTCACCTGCTCTCTA    | NM_054021: | NM_054021:                                       |
| 84109  | GPR103  | G protein-coupled receptor 103                                       | 1.77  | AGGAATTAACAATGATGCGGAAA | NM_198179: | NM_198179:                                       |
| 84109  | GPR103  | G protein-coupled receptor 103                                       | 0.12  | ATGGAAATTCAGGAATACAAA   | NM_198179: | NM_198179:                                       |
| 57720  | GPR107  | G protein-coupled receptor 107                                       | -4.69 | TAGCTAGACCGTCAAAAAGAAA  | NM_020960: | NM_020960:                                       |
| 57720  | GPR107  | G protein-coupled receptor 107                                       | -0.09 | CAGAAGTGAAGTGAAGGATAAA  | NM_020960: | NM_020960:                                       |
| 56927  | GPR108  | G protein-coupled receptor 108                                       | -0.12 | CAAGTACGCTGTGCGGATAAA   | XM_290854: | XM_290854:                                       |
| 56927  | GPR108  | G protein-coupled receptor 108                                       | -1.12 | CCCGGACAAAGCCATTTGGAAA  | XM_290854: | XM_290854:                                       |
| 338442 | GPR109A | G protein-coupled receptor 109A                                      | -0.17 | CTCCTTAAATAACCATGCGAAA  | NM_177551: | NM_177551:                                       |
| 338442 | GPR109A | G protein-coupled receptor 109A                                      | -1.12 | TGGGCCAACCTCTCCTTTAAA   | NM_177551: | NM_177551:                                       |
| 266977 | GPR110  | G protein-coupled receptor 110                                       | -0.60 | CACCTAGTGAATGAAACTCAA   | NM_153840: | NM_153840:                                       |
| 266977 | GPR110  | G protein-coupled receptor 110                                       | -1.68 | CAGGTCAATGGACCTGTGATA   | NM_153840: | NM_153840:                                       |
| 266977 | GPR110  | G protein-coupled receptor 110                                       | 0.13  | AAAGCATATGAAAGAAATTCAAA | NM_025048: | NM_025048:NM_153840:                             |
| 266977 | GPR110  | G protein-coupled receptor 110                                       | -0.62 | ATGGGCTAATTAAGAATATCAA  | NM_025048: | NM_025048:NM_153840:                             |
| 222611 | GPR111  | G protein-coupled receptor 111                                       | 0.08  | AAGAAGGCTATTCATAGATAAA  | NM_153839: | NM_153839:                                       |
| 222611 | GPR111  | G protein-coupled receptor 111                                       | 0.85  | CAGCCATTTGAAGACAATAATA  | NM_153839: | NM_153839:                                       |
| 139378 | GPR112  | G protein-coupled receptor 112                                       | -2.21 | CACGGTAATCTCTGTGACGAAA  | NM_153834: | NM_153834:                                       |

|        |              |                                 |       |                        |               |                                                |
|--------|--------------|---------------------------------|-------|------------------------|---------------|------------------------------------------------|
| 139378 | GPR112       | G protein-coupled receptor 112  | 0.77  | CGGAACTGTACCTTGGTTTA   | NM_153834:    | NM_153834:                                     |
| 165082 | GPR113       | G protein-coupled receptor 113  | -0.76 | CAGAGTGTAAATGCAACCACA  | NM_153835:    | NM_153835:                                     |
| 165082 | GPR113       | G protein-coupled receptor 113  | 0.00  | TCGTAATGGAACTGAAATAA   | NM_153835:    | NM_153835:                                     |
| 221188 | GPR114       | G protein-coupled receptor 114  | -0.01 | AGCGGCTTTTGTTCAGCCTAA  | NM_153837:    | NM_153837:                                     |
| 221188 | GPR114       | G protein-coupled receptor 114  | 0.45  | AGGCATGGGTCTCGAATCTTA  | NM_153837:    | NM_153837:                                     |
| 221393 | GPR115       | G protein-coupled receptor 115  | 0.05  | TAGGAGAATGTCCCACTATA   | NM_153838:    | NM_153838:                                     |
| 221393 | GPR115       | G protein-coupled receptor 115  | 0.78  | TAGGCTCTCACTTAAACATTA  | NM_153838:    | NM_153838:                                     |
| 221395 | GPR116       | G protein-coupled receptor 116  | 0.04  | AAGGATCTTTCTTATAGCATA  | NM_015234:    | NM_015234:                                     |
| 221395 | GPR116       | G protein-coupled receptor 116  | -0.38 | TTGAGTCTTCATGAACATGAA  | NM_015234:    | NM_015234:                                     |
| 139760 | GPR119       | G protein-coupled receptor 119  | -1.04 | CTCCCTCATCATTGCTACTAA  | NM_178471:    | NM_178471:                                     |
| 139760 | GPR119       | G protein-coupled receptor 119  | -1.36 | CAGGAGTGTACCTCTACCTA   | NM_178471:    | NM_178471:                                     |
| 2835   | GPR12        | G protein-coupled receptor 12   | 1.34  | CGGCATTGGACTCATACCATA  | NM_005288:    | NM_005288:                                     |
| 2835   | GPR12        | G protein-coupled receptor 12   | 0.07  | CTGGATGCCTTTCACCCCTCTA | NM_005288:    | NM_005288:                                     |
| 338557 | GPR120       | G protein-coupled receptor 120  | 0.91  | AAGAAATGACTTGTGCGATTAT | NM_181745:    | NM_181745:                                     |
| 338557 | GPR120       | G protein-coupled receptor 120  | -2.76 | CACAGTGAGATCACAAAGGCA  | NM_181745:    | NM_181745:                                     |
| 84435  | GPR123 (G p  | G protein-coupled receptor 123  | -0.31 | CAGTGAAGGCTTCCACCTA    | NM_032422:    | NM_032422:                                     |
| 84435  | GPR123 (G p  | G protein-coupled receptor 123  | -1.60 | CTGCCAAGGGTAAATTGCTA   | NM_032422:    | NM_032422:                                     |
| 25960  | GPR124       | G protein-coupled receptor 124  | 0.18  | CCACAGGAGGTGACTTAAA    | NM_032777:    | NM_032777:                                     |
| 25960  | GPR124       | G protein-coupled receptor 124  | -1.29 | CGACTAAACATATCTGGAAA   | NM_032777:    | NM_032777:                                     |
| 166647 | GPR125       | G protein-coupled receptor 125  | -1.91 | ATGGATTTACGGGATCTGAA   | XM_291111.1:  | NM_145290:                                     |
| 166647 | GPR125       | G protein-coupled receptor 125  | -3.78 | CAGCTGTAAATGACTGACA    | XM_291111.1:  | NM_145290:                                     |
| 57211  | GPR126       | G protein-coupled receptor 126  | 1.08  | ACCTAGGTAAGTGCATATATA  | NM_020455:    | NM_001032394:NM_001032395:NM_020455:NM_198569: |
| 57211  | GPR126       | G protein-coupled receptor 126  | 0.48  | TAGAATATCCGTAGTGATTTA  | NM_020455:    | NM_001032394:NM_001032395:NM_020455:NM_198569: |
| 84873  | GPR128       | G protein-coupled receptor 128  | -1.54 | ACGCGAGTGGTTGGACAGATA  | NM_032787:    | NM_032787:                                     |
| 84873  | GPR128       | G protein-coupled receptor 128  | 0.17  | CACAGCTCTATTACCTTCTAA  | NM_032787:    | NM_032787:                                     |
| 29933  | GPR132       | G protein-coupled receptor 132  | -4.99 | ACGGACCATTCCGCCAAGAA   | NM_013345:    | NM_013345:                                     |
| 29933  | GPR132       | G protein-coupled receptor 132  | -0.15 | CTGGTCCACATCGAGATCAA   | NM_013345:    | NM_013345:                                     |
| 283383 | GPR133       | G protein-coupled receptor 133  | 0.01  | CAAGCACAGATTGACAGCTAA  | NM_198827:    | NM_198827:                                     |
| 283383 | GPR133       | G protein-coupled receptor 133  | -1.73 | CAGCATGCCTACTACCTGAA   | NM_198827:    | NM_198827:                                     |
| 64582  | GPR135       | G protein-coupled receptor 135  | -0.04 | ACCAACAGCCTAAATCCGAA   | NM_022571:    | NM_022571:                                     |
| 64582  | GPR135       | G protein-coupled receptor 135  | -2.73 | CAACAGGATGTCCCTTCCAA   | NM_022571:    | NM_022571:                                     |
| 56834  | GPR137       | G protein-coupled receptor 137  | 0.53  | CGGGTGGACACCTTCGATTA   | NM_020155:    | NM_020155:                                     |
| 56834  | GPR137       | G protein-coupled receptor 137  | 0.59  | TAGCATCTACCTGGAGGCCAA  | NM_020155:    | NM_020155:                                     |
| 7107   | GPR137B      | G protein-coupled receptor 137B | -1.96 | ACCTACCACCTTAGTCTGTTA  | NM_003272:    | NM_003272:                                     |
| 7107   | GPR137B      | G protein-coupled receptor 137B | -0.02 | CAGGAACCTTGGCAAGCTCAA  | NM_003272:    | NM_003272:                                     |
| 283554 | GPR137C      | G protein-coupled receptor 137C | 1.01  | CTGGCGGAGGTATATGTAAA   | XM_290615:    | XM_290615:                                     |
| 283554 | GPR137C      | G protein-coupled receptor 137C | -3.01 | TCGAAAGGAGTTGTTATAAA   | XM_290615:    | XM_290615:                                     |
| 124274 | GPR139       | G protein-coupled receptor 139  | 0.15  | ACCGTTAACCATTGACAGGTA  | XM_064062.4:  | NM_001002911:                                  |
| 353345 | GPR141       | G protein-coupled receptor 141  | -0.72 | CAAAAGTGAATTTACAGAAA   | NM_181791:    | NM_181791:                                     |
| 353345 | GPR141       | G protein-coupled receptor 141  | 0.00  | TCGCTTGACCTACCTCATCAA  | NM_181791:    | NM_181791:                                     |
| 350383 | GPR142       | G protein-coupled receptor 142  | 0.87  | CGGGTCTTGTCTAGCTCTA    | NM_181790:    | NM_181790:                                     |
| 350383 | GPR142       | G protein-coupled receptor 142  | -6.73 | AACACTGGACGAGGTCTCCAA  | NM_181790:    | NM_181790:                                     |
| 4935   | GPR143       | G protein-coupled receptor 143  | -1.09 | CAGCTAGAGCTTCTCCCGAA   | NM_000273:    | NM_000273:                                     |
| 4935   | GPR143       | G protein-coupled receptor 143  | 0.19  | TGGGATATGAACACACGGAA   | NM_000273:    | NM_000273:                                     |
| 347088 | GPR144       | G protein-coupled receptor 144  | -1.05 | CTGGCTCAATGTGCACACAAA  | NM_182611:    | NM_182611:                                     |
| 347088 | GPR144       | G protein-coupled receptor 144  | -1.22 | CCGAGTCAATGCCCTTGGCCAA | NM_182611:    | NM_182611:                                     |
| 115330 | GPR146       | G protein-coupled receptor 146  | 1.25  | AGCATTCAAGTTTGCATAGAA  | NM_138445:    | NM_138445:                                     |
| 115330 | GPR146       | G protein-coupled receptor 146  | -6.98 | CAGGGTCTGAGAACATTTCA   | NM_138445:    | NM_138445:                                     |
| 344561 | GPR148       | G protein-coupled receptor 148  | -2.13 | CAGCACAAATAATAGTGGAA   | NM_207364:    | NM_207364:                                     |
| 344561 | GPR148       | G protein-coupled receptor 148  | 0.10  | CCACTTACTACTACTTCTTA   | NM_207364:    | NM_207364:                                     |
| 344758 | GPR149       | G protein-coupled receptor 149  | -1.30 | CACCGTGAGCGTAGCCAGAAA  | XM_293580.1:  | XM_293580:                                     |
| 344758 | GPR149       | G protein-coupled receptor 149  | 0.61  | CAGTGTGCAATCATAGTAA    | XM_293580.1:  | XM_293580:                                     |
| 2838   | GPR15        | G protein-coupled receptor 15   | -3.03 | TTAGTATTTTGGATTATTA    | NM_005290:    | NM_005290:                                     |
| 2838   | GPR15        | G protein-coupled receptor 15   | 0.61  | TTGCGGCAAGAACACTATTTA  | NM_005290:    | NM_005290:                                     |
| 285601 | GPR150       | G protein-coupled receptor 150  | -6.21 | CCTGCAGGTCTACGGGTTCTA  | NM_199243:    | NM_199243:                                     |
| 285601 | GPR150       | G protein-coupled receptor 150  | -0.86 | GGTCCGCAAGATGGACTTCTCT | NM_199243:    | NM_199243:                                     |
| 134391 | GPR151       | G protein-coupled receptor 151  | 0.09  | CGGAGCTACGGCGTACTCCAA  | NM_194251:    | NM_194251:                                     |
| 134391 | GPR151       | G protein-coupled receptor 151  | -3.03 | CTCCTTCAACATGTCTGGAAA  | NM_194251:    | NM_194251:                                     |
| 390212 | GPR152       | G protein-coupled receptor 152  | -6.14 | CAGGACCATTCTGTCAAGCCTA | NM_206997:    | NM_206997:                                     |
| 390212 | GPR152       | G protein-coupled receptor 152  | -3.31 | CAATGGACACTACCATTGGAA  | NM_206997:    | NM_206997:                                     |
| 387509 | GPR153       | G protein-coupled receptor 153  | -4.21 | CAGCGTTGGCGCCAAAGCAGAA | NM_207370:    | NM_207370:                                     |
| 387509 | GPR153       | G protein-coupled receptor 153  | -2.95 | GACCACCATAGTCTTCACTA   | NM_207370:    | NM_207370:                                     |
| 387129 | GPR154       | G protein-coupled receptor 154  | -0.23 | CACCCTGATCATATTTGGGAA  | NM_207172:    | NM_207172:NM_207173:                           |
| 387129 | GPR154       | G protein-coupled receptor 154  | 1.60  | CAGATATAATTTGGGATTTCA  | NM_207172:    | NM_207172:NM_207173:                           |
| 151556 | GPR155       | G protein-coupled receptor 155  | -0.04 | CAGGAGATGGACCTTAAATTA  | NM_152529:    | NM_152529:NM_001033045:                        |
| 151556 | GPR155       | G protein-coupled receptor 155  | 0.51  | TACGAATATGCCAACATTTA   | NM_152529:    | NM_152529:NM_001033045:                        |
| 165829 | GPR156       | G protein-coupled receptor 156  | -2.28 | CACGGTATAGTTCAGTAATCA  | NM_153002:    | NM_153002:                                     |
| 165829 | GPR156       | G protein-coupled receptor 156  | -1.65 | CCCGACAAGAGAGTATTAT    | NM_153002:    | NM_153002:                                     |
| 57512  | GPR158       | G protein-coupled receptor 158  | 0.16  | TGGTGGCTCTATAAAGCTCAA  | NM_020752:    | NM_020752:                                     |
| 57512  | GPR158       | G protein-coupled receptor 158  | -0.62 | CTGCTATATCCATACAATTA   | NM_020752:    | NM_020752:                                     |
| 26996  | GPR160       | G protein-coupled receptor 160  | 0.15  | AAGGGCTATACCAGTTATTA   | NM_014373:    | NM_014373:                                     |
| 26996  | GPR160       | G protein-coupled receptor 160  | 0.57  | CAACTTAAAGATATCAACCTA  | NM_014373:    | NM_014373:                                     |
| 23432  | GPR161       | G protein-coupled receptor 161  | 0.57  | AAGACAGTTCGCAAAAGAACTA | NM_007369:    | NM_007369:NM_153832:                           |
| 23432  | GPR161       | G protein-coupled receptor 161  | -2.11 | CTGGAAACAAGACAGTTCGCAA | NM_007369:    | NM_007369:NM_153832:                           |
| 27239  | GPR162       | G protein-coupled receptor 162  | -0.72 | ATCAATTGACAGGATGTCTAA  | NM_014449:    | NM_014449:NM_019858:                           |
| 27239  | GPR162       | G protein-coupled receptor 162  | 0.86  | CCGACTATGACTGGAAACGAGA | NM_014449:    | NM_019858:                                     |
| 2840   | GPR17        | G protein-coupled receptor 17   | 0.65  | ATCGCTAGTCTCAACCCATA   | NM_005291:    | NM_005291:                                     |
| 2840   | GPR17        | G protein-coupled receptor 17   | 0.21  | CAGCAGCTAGAGGATGTCCAA  | NM_005291:    | NM_005291:                                     |
| 29909  | GPR171       | G protein-coupled receptor 171  | -2.22 | AGGCTTGTCTACTACTATTA   | NM_013308:    | NM_013308:                                     |
| 29909  | GPR171       | G protein-coupled receptor 171  | -0.39 | CCCAAGGTATTCAATGAGTTA  | NM_013308:    | NM_013308:                                     |
| 79581  | GPR172A      | G protein-coupled receptor 172A | -2.26 | CACCACTGAAAGAGCCACCAA  | NM_024531:    | NM_024531:                                     |
| 79581  | GPR172A      | G protein-coupled receptor 172A | 0.55  | TGGCGTGTCTCCTACGTGAA   | NM_024531:    | NM_024531:                                     |
| 55065  | GPR172B      | G protein-coupled receptor 172B | 0.50  | ACCACGTGTTTCAAAGCAGAA  | NM_017986:    | NM_017986:                                     |
| 55065  | GPR172B      | G protein-coupled receptor 172B | 0.08  | TTGTGGGATTTGCAATATA    | NM_017986:    | NM_017986:                                     |
| 54328  | GPR173       | G protein-coupled receptor 173  | 0.04  | ACGGCTCTCATGACCTTCA    | NM_018969:    | NM_018969:                                     |
| 54328  | GPR173       | G protein-coupled receptor 173  | -1.01 | CACGCTGGGCTTCACTGTTAT  | NM_018969:    | NM_018969:                                     |
| 84636  | GPR174       | G protein-coupled receptor 174  | -0.26 | CAGAAGGTGATTTCAATATT   | NM_032553:    | NM_032553:                                     |
| 84636  | GPR174       | G protein-coupled receptor 174  | 0.74  | GAGCATTACGATCCACGATTA  | NM_032553:    | NM_032553:                                     |
| 131601 | GPR175       | G protein-coupled receptor 175  | -1.34 | CAAGATCTCTTCTCCTACAA   | NM_016372:    | NM_016372:                                     |
| 131601 | GPR175       | G protein-coupled receptor 175  | 0.27  | TCGGAGGAGCTTCTACGTGTA  | NM_016372:    | NM_016372:                                     |
| 11245  | GPR176       | G protein-coupled receptor 176  | -0.04 | CAGCCTGCCATGGACATAA    | NM_007223:    | NM_007223:                                     |
| 11245  | GPR176       | G protein-coupled receptor 176  | 0.01  | CAGGTACTACTCAGTCTCTA   | NM_007223:    | NM_007223:                                     |
| 440435 | GPR179       | G protein-coupled receptor 179  | -0.35 | CACCATCACTCAAGCTTTA    | NM_001004334: | NM_001004334:                                  |
| 440435 | GPR179       | G protein-coupled receptor 179  | 0.71  | ACAGAAGAATTCAGTCTGAA   | NM_001004334: | NM_001004334:                                  |
| 2841   | GPR18 (G prt | G protein-coupled receptor 18   | -4.98 | CTGGTAGTCTACGGTCACTAA  | NM_005292:    | NM_005292:                                     |
| 2841   | GPR18 (G prt | G protein-coupled receptor 18   | -2.47 | TACGGTCACTAAGCAATATA   | NM_005292:    | NM_005292:                                     |
| 2842   | GPR19 (G prt | G protein-coupled receptor 19   | -1.57 | CATGCTCCTATGAAATGTTA   | NM_006143:    | NM_006143:                                     |

|        |                                                                       |       |                        |               |                                |
|--------|-----------------------------------------------------------------------|-------|------------------------|---------------|--------------------------------|
| 2842   | GPR19 (G pr G protein-coupled receptor 19                             | -5.11 | CGGTTCTACACCATCGTCTA   | NM_006143:    | NM_006143:                     |
| 2843   | GPR20 (G pr G protein-coupled receptor 20                             | -0.14 | CACGCGCTTGGCTGTGACTA   | NM_005293:    | NM_005293:                     |
| 2843   | GPR20 (G pr G protein-coupled receptor 20                             | 0.88  | CTCAGTCATCTACACCATCAA  | NM_005293:    | NM_005293:                     |
| 2844   | GPR21 (G pr G protein-coupled receptor 21                             | 0.43  | CACCGTGTTCATCGTGTGAT   | NM_005294:    | NM_005294:                     |
| 2844   | GPR21 (G pr G protein-coupled receptor 21                             | 0.96  | CTGTTTGAATCACTAGTGA    | NM_005294:    | NM_005294:                     |
| 2845   | GPR22 G protein-coupled receptor 22                                   | -9.42 | AAGTGCTCAACGCAATCAA    | NM_005295:    | NM_005295:                     |
| 2845   | GPR22 G protein-coupled receptor 22                                   | 1.69  | CAGGCTTAAATATCGAATA    | NM_005295:    | NM_005295:                     |
| 2846   | GPR23 G protein-coupled receptor 23                                   | 1.40  | AGGAAGTGATGATCAAACAA   | NM_005296:    | NM_005296:                     |
| 2846   | GPR23 G protein-coupled receptor 23                                   | 0.59  | GGGCCTATAAATATAGAACAA  | NM_005296:    | NM_005296:                     |
| 2848   | GPR25 (G pr G protein-coupled receptor 25                             | 0.94  | CGGAGGAACTCGGTGCGCAT   | NM_005298:    | NM_005298:                     |
| 2848   | GPR25 (G pr G protein-coupled receptor 25                             | 0.73  | CTGGCCAAACCCGTCATCTA   | NM_005298:    | NM_005298:                     |
| 2849   | GPR26 G protein-coupled receptor 26                                   | -1.82 | CTAGGTTTCAATTTCTTGTGA  | NM_153442:    | NM_153442:                     |
| 2849   | GPR26 G protein-coupled receptor 26                                   | -1.07 | CTGAGTTTAAATGAGGATATTA | NM_153442:    | NM_153442:                     |
| 2850   | GPR27 G protein-coupled receptor 27                                   | -1.39 | CGCGTGTCTTCTTCATCCCA   | NM_018971:    | NM_018971:                     |
| 2850   | GPR27 G protein-coupled receptor 27                                   | 0.84  | GAGGCTGTGCAAGATGTTCTA  | NM_018971:    | NM_018971:                     |
| 2827   | GPR3 G protein-coupled receptor 3                                     | -0.28 | AGCCATCACCTGAGCAACCAA  | NM_005281:    | NM_005281:                     |
| 2827   | GPR3 G protein-coupled receptor 3                                     | -0.86 | TACGTTTGAATTTCTGAGCTA  | NM_005281:    | NM_005281:                     |
| 2852   | GPR30 G protein-coupled receptor 30                                   | 0.91  | CGGCCACGTCATGCTCTAAA   | NM_001505:    | NM_001505:                     |
| 2852   | GPR30 G protein-coupled receptor 30                                   | 0.65  | CTGGATGAGCTTCGACCCTGA  | NM_001505:    | NM_001505:                     |
| 2853   | GPR31 (G pr G protein-coupled receptor 31                             | -2.42 | CCCGGGCTTGTCTATCTCTGA  | NM_005299:    | NM_005299:                     |
| 2853   | GPR31 (G pr G protein-coupled receptor 31                             | 0.04  | TGGCCTCATCGTGTCTTGCAA  | NM_005299:    | NM_005299:                     |
| 2854   | GPR32 (G pr G protein-coupled receptor 32                             | 0.56  | CACCTTTGTGTTCTCAGCTA   | NM_001506:    | NM_001506:                     |
| 2854   | GPR32 (G pr G protein-coupled receptor 32                             | -0.82 | TTGGCAGAGATTTCCAAGAAA  | NM_001506:    | NM_001506:                     |
| 2857   | GPR34 (G pr G protein-coupled receptor 34                             | -0.19 | TCAGGCGAACCTGAACITTTAA | NM_005300:    | NM_005300:                     |
| 2857   | GPR34 (G pr G protein-coupled receptor 34                             | 1.40  | TGGACTATTACCAAAATAGAA  | NM_005300:    | NM_005300:                     |
| 2859   | GPR35 (G pr G protein-coupled receptor 35                             | -0.47 | CGGGACAATTTCAACTCCAT   | NM_005301:    | NM_005301:                     |
| 2859   | GPR35 (G pr G protein-coupled receptor 35                             | -0.95 | CGCCCTGTACATAACCAAGCAA | NM_005301:    | NM_005301:                     |
| 2861   | GPR37 G protein-coupled receptor 37 (endothelin receptor type B-like) | 0.07  | CACCAACGTACAGATGACTA   | NM_005302:    | NM_005302:                     |
| 2861   | GPR37 G protein-coupled receptor 37 (endothelin receptor type B-like) | -0.04 | CGGCAGAAAGTGCAATATTA   | NM_005302:    | NM_005302:                     |
| 9283   | GPR37L1 G protein-coupled receptor 37 like 1                          | 1.16  | GCCTTCTTGAGAACAATAA    | NM_004767:    | NM_004767:                     |
| 9283   | GPR37L1 G protein-coupled receptor 37 like 1                          | -1.03 | TAGGAGGCCCTCTTGAGAAA   | NM_004767:    | NM_004767:                     |
| 2863   | GPR39 (G pr G protein-coupled receptor 39                             | -0.84 | CGGCATGCCCATGGAGTTCTA  | NM_001508:    | NM_001508:                     |
| 2863   | GPR39 (G pr G protein-coupled receptor 39                             | -0.53 | CGGGAGTGAAGTCTCCCAAA   | NM_001508:    | NM_001508:                     |
| 2828   | GPR4 (G prot G protein-coupled receptor 4                             | -0.05 | CACAGGGCTCACCATACACAA  | NM_005282:    | NM_005282:                     |
| 2828   | GPR4 (G prot G protein-coupled receptor 4                             | -2.07 | CAGCGATATAGAGTCAATTAT  | NM_005282:    | NM_005282:                     |
| 11251  | GPR44 G protein-coupled receptor 44                                   | 0.04  | CGGGCGCATATGAGTCTACTA  | NM_004778:    | NM_004778:                     |
| 11251  | GPR44 G protein-coupled receptor 44                                   | -1.21 | CTCGAGGGACTTAAAGTGCTA  | NM_004778:    | NM_004778:                     |
| 11250  | GPR45 G protein-coupled receptor 45                                   | 0.74  | CAGCGTGGACTTGAGCTTCAA  | NM_007227:    | NM_007227:                     |
| 11250  | GPR45 G protein-coupled receptor 45                                   | -0.68 | TGGAACTGCAACGTCATTTAA  | NM_007227:    | NM_007227:                     |
| 9248   | GPR50 G protein-coupled receptor 50                                   | 0.60  | ACGGATCTTCAGTGTGCGCAA  | NM_004224:    | NM_004224:                     |
| 9248   | GPR50 G protein-coupled receptor 50                                   | -0.61 | CTGGCTTTATCTTGACGCGCTA | NM_004224:    | NM_004224:                     |
| 9293   | GPR52 G protein-coupled receptor 52                                   | -0.28 | AACTGGCTTGACAGTAAGTAA  | NM_005684:    | NM_005684:                     |
| 9293   | GPR52 G protein-coupled receptor 52                                   | -0.67 | CAGGTGTCACGAGTCAATTA   | NM_005684:    | NM_005684:                     |
| 9290   | GPR55 (G pr G protein-coupled receptor 55                             | 1.51  | CGGTTCTTGGCCATCCGTTA   | NM_005683:    | NM_005683:                     |
| 9290   | GPR55 (G pr G protein-coupled receptor 55                             | -0.10 | CTGAGAGGACCTGATCATGTA  | NM_005683:    | NM_005683:                     |
| 9289   | GPR56 G protein-coupled receptor 56                                   | 1.27  | GAGGCTCTGGACATCCTTAA   | NM_005682:    | NM_201524:NM_201525:NM_005682: |
| 9289   | GPR56 G protein-coupled receptor 56                                   | 0.10  | TGGCCGCCCATCATGGTTAA   | NM_005682:    | NM_201524:NM_201525:NM_005682: |
| 2830   | GPR6 (G prot G protein-coupled receptor 6                             | -0.05 | ACGAAATAACCCATATCAAGA  | NM_005284:    | NM_005284:                     |
| 2830   | GPR6 (G prot G protein-coupled receptor 6                             | 0.66  | CTGCTTAATATAGCATTTTA   | NM_005284:    | NM_005284:                     |
| 83873  | GPR61 G protein-coupled receptor 61                                   | 1.17  | CCCATTTAAAGCAGTAAATAA  | NM_031936:    | NM_031936:                     |
| 83873  | GPR61 G protein-coupled receptor 61                                   | 0.93  | GTGGGATAGTCTCCATTTAA   | NM_031936:    | NM_031936:                     |
| 118442 | GPR62 G protein-coupled receptor 62                                   | -3.00 | CCCTAAGGGCTCACAAACCAA  | NM_080865:    | NM_080865:                     |
| 118442 | GPR62 G protein-coupled receptor 62                                   | -0.12 | CTGACCAGTTTGGTATTAGA   | NM_080865:    | NM_080865:                     |
| 81491  | GPR63 G protein-coupled receptor 63                                   | -0.19 | ACCTTCTGGTAACTACTGTA   | NM_030784:    | NM_030784:                     |
| 81491  | GPR63 G protein-coupled receptor 63                                   | 0.02  | CTCATTATGGGCATACTCAA   | NM_030784:    | NM_030784:                     |
| 10149  | GPR64 G protein-coupled receptor 64                                   | 0.04  | CCCAGTAGTCAGATTATAGAA  | NM_005756:    | NM_005756:                     |
| 10149  | GPR64 G protein-coupled receptor 64                                   | -0.14 | CGGGAGGATTACCCTTCCAA   | NM_005756:    | NM_005756:                     |
| 8477   | GPR65 G protein-coupled receptor 65                                   | 1.98  | AGGGAACCTACCAATGTATA   | NM_003608:    | NM_003608:                     |
| 8477   | GPR65 G protein-coupled receptor 65                                   | -0.27 | CGTGTGCAATTAACAAATTTAA | NM_003608:    | NM_003608:                     |
| 8111   | GPR68 G protein-coupled receptor 68                                   | -2.94 | CAGCGTGTGTCATCTGGGCCAA | NM_003485:    | NM_003485:                     |
| 8111   | GPR68 G protein-coupled receptor 68                                   | 0.03  | CGCGTGTGCTTTGAGCACTA   | NM_003485:    | NM_003485:                     |
| 10936  | GPR75 G protein-coupled receptor 75                                   | -0.58 | ATGACTTTAATCTAACTTGA   | NM_006794:    | NM_006794:                     |
| 10936  | GPR75 G protein-coupled receptor 75                                   | 0.02  | CCAGCTGTGATCAGCCATCAA  | NM_006794:    | NM_006794:                     |
| 27202  | GPR77 G protein-coupled receptor 77                                   | -0.48 | CACGTGCTGGACAATCTTAA   | NM_018485:    | NM_018485:                     |
| 27202  | GPR77 G protein-coupled receptor 77                                   | -9.45 | CAGCAGAAATCCACCAGCCA   | NM_018485:    | NM_018485:                     |
| 27201  | GPR78 (G pr G protein-coupled receptor 78                             | -1.15 | CACGAGGAGAGAGAAAGGAAA  | NM_080819:    | NM_080819:                     |
| 27201  | GPR78 (G pr G protein-coupled receptor 78                             | 0.01  | CAGGAAGATTGGCATTGCTAT  | NM_080819:    | NM_080819:                     |
| 27198  | GPR81 G protein-coupled receptor 81                                   | 1.93  | AGGTCATTAGTCAACTCTTA   | NM_032554:    | NM_032554:                     |
| 27198  | GPR81 G protein-coupled receptor 81                                   | 0.75  | TGGATCTATTGATCTATCAA   | NM_032554:    | NM_032554:                     |
| 27197  | GPR82 (G pr G protein-coupled receptor 82                             | 0.54  | ATGCTTTCAAGTATCTTAT    | NM_080817:    | NM_080817:                     |
| 27197  | GPR82 (G pr G protein-coupled receptor 82                             | -0.01 | CATGGCTTACCAATCATTTA   | NM_080817:    | NM_080817:                     |
| 10888  | GPR83 G protein-coupled receptor 83                                   | 1.22  | TACGCTGTGTGGCCAAGAAA   | NM_016540:    | NM_016540:                     |
| 10888  | GPR83 G protein-coupled receptor 83                                   | -1.17 | TTGCTGTGTTGCTCAATAAA   | NM_016540:    | NM_016540:                     |
| 53831  | GPR84 G protein-coupled receptor 84                                   | 1.30  | CCCAAGGAGTATTATTAATTA  | NM_020370:    | NM_020370:                     |
| 53831  | GPR84 G protein-coupled receptor 84                                   | 0.01  | TCCATTATAGAAAGAAATGAA  | NM_020370:    | NM_020370:                     |
| 54329  | GPR85 G protein-coupled receptor 85                                   | -0.41 | AAGCACAACATGGAAGACTA   | NM_018970:    | NM_018970:                     |
| 54329  | GPR85 G protein-coupled receptor 85                                   | -0.05 | CAAGGGAACCTTACTGTGTTA  | NM_018970:    | NM_018970:                     |
| 53836  | GPR87 G protein-coupled receptor 87                                   | -0.38 | CGGTGCTTTATCTCATTTATA  | NM_023915:    | NM_023915:                     |
| 53836  | GPR87 G protein-coupled receptor 87                                   | -1.10 | TGGGAAGTTCGCATATATTAT  | NM_023915:    | NM_023915:                     |
| 54112  | GPR88 G protein-coupled receptor 88                                   | -3.31 | ACCAGTATGAGTTGCCATTAA  | NM_022049:    | NM_022049:                     |
| 54112  | GPR88 G protein-coupled receptor 88                                   | 0.23  | TACCACGACATTTAACATCAA  | NM_022049:    | NM_022049:                     |
| 51463  | GPR89A G protein-coupled receptor 89A                                 | -0.67 | ATGGATATGATCATAAGCAAA  | NM_016334:    | NM_016334:                     |
| 51463  | GPR89A G protein-coupled receptor 89A                                 | -2.09 | ACGGAGAACAATGTCCAGAA   | NM_016334:    | NM_016334:                     |
| 57121  | GPR92 G protein-coupled receptor 92                                   | 0.72  | ACCCGCTGGTACTACTTTTA   | NM_020400:    | NM_020400:                     |
| 57121  | GPR92 G protein-coupled receptor 92                                   | -9.57 | CGGAGGTGAATGCCATGCCA   | NM_020400:    | NM_020400:                     |
| 222487 | GPR97 G protein-coupled receptor 97                                   | -0.90 | AAGTTTGCAGCAAGAGGTGA   | NM_170776:    | NM_170776:                     |
| 222487 | GPR97 G protein-coupled receptor 97                                   | -1.05 | CAACATGTACGACATCTTCAA  | NM_170776:    | NM_170776:                     |
| 9737   | GPRASP1 G protein-coupled receptor associated sorting protein 1       | 0.22  | ACGCCCTAAGAGTAAGGCCAA  | NM_014710:    | NM_014710:                     |
| 9737   | GPRASP1 G protein-coupled receptor associated sorting protein 1       | 0.47  | TATGCAAGTAATCCAGACCAA  | NM_014710:    | NM_014710:                     |
| 114928 | GPRASP2 G protein-coupled receptor associated sorting protein 2       | 1.14  | CTGGATCAGTACTAAATCTA   | NM_001004051: | NM_138437:NM_001004051:        |
| 114928 | GPRASP2 G protein-coupled receptor associated sorting protein 2       | 0.96  | ACCCTGTATTCTGTTGTTTAA  | NM_001004051: | NM_138437:NM_001004051:        |
| 9052   | GPRCSA G protein-coupled receptor, family C, group 5, member A        | 0.16  | CAACTCAAGTTTAGACCCCTA  | NM_003979:    | NM_003979:                     |
| 9052   | GPRCSA G protein-coupled receptor, family C, group 5, member A        | -0.83 | CAGGATGTTATCGCTATTGAA  | NM_003979:    | NM_003979:                     |
| 51704  | GPRCSB G protein-coupled receptor, family C, group 5, member B        | 0.52  | CTCGCCCTGTCTACACTTA    | NM_016235:    | NM_016235:                     |
| 51704  | GPRCSB G protein-coupled receptor, family C, group 5, member B        | 0.96  | TCCGTTTGAAGCAACGTGTA   | NM_016235:    | NM_016235:                     |
| 55890  | GPRCSC G protein-coupled receptor, family C, group 5, member C        | 0.04  | GAGCATGTTCTGGAGAACAA   | NM_018653:    | NM_022036:NM_018653:           |
| 55890  | GPRCSC G protein-coupled receptor, family C, group 5, member C        | 0.00  | GTGGATCGTCATGATACTTA   | NM_018653:    | NM_018653:                     |
| 55507  | GPRCSD G protein-coupled receptor, family C, group 5, member D        | -0.12 | CAGAGGTATGATGTTGTGAA   | NM_018654:    | NM_018654:                     |
| 55507  | GPRCSD G protein-coupled receptor, family C, group 5, member D        | 0.76  | TAGATTAACTCATATGGTA    | NM_018654:    | NM_018654:                     |

|        |                                                                                           |                                                                           |       |                        |            |                                                |
|--------|-------------------------------------------------------------------------------------------|---------------------------------------------------------------------------|-------|------------------------|------------|------------------------------------------------|
| 222545 | GPRC6A                                                                                    | G protein-coupled receptor, family C, group 6, member A                   | -1.25 | CAGAATCAATCGGACACTGAA  | NM_148963: | NM_148963:                                     |
| 222545 | GPRC6A                                                                                    | G protein-coupled receptor, family C, group 6, member A                   | 0.45  | CGGGGACATATCATAATTGGA  | NM_148963: | NM_148963:                                     |
| 2873   | GPS1                                                                                      | G protein pathway suppressor 1                                            | -0.19 | AACCTTTAACGTGGACATGTA  | NM_004127: | NM_004127;NM_212492:                           |
| 2873   | GPS1                                                                                      | G protein pathway suppressor 1                                            | -0.35 | CAGCCTGGATCTGGAAACAGTA | NM_004127: | NM_004127;NM_212492:                           |
| 29899  | GPSM2                                                                                     | G-protein signalling modulator 2 (AGS3-like, C. elegans)                  | 0.88  | CACCACACTTATATATACTA   | NM_013296: | NM_013296:                                     |
| 29899  | GPSM2                                                                                     | G-protein signalling modulator 2 (AGS3-like, C. elegans)                  | 0.66  | TAGGAAATCATGATCAAGCAA  | NM_013296: | NM_013296:                                     |
| 2875   | GPT                                                                                       | glutamic-pyruvate transaminase (alanine aminotransferase)                 | -1.28 | CCCCTGTACTGCTCTTGAT    | NM_005309: | NM_005309:                                     |
| 2875   | GPT                                                                                       | glutamic-pyruvate transaminase (alanine aminotransferase)                 | -0.52 | CGGGGAGGACGTGGCGGGTA   | NM_005309: | NM_005309:                                     |
| 2876   | GPX1                                                                                      | glutathione peroxidase 1                                                  | 0.06  | AACACCTTGATCTTACAGAAA  | Y00433:    | NM_000581;NM_201397:                           |
| 2876   | GPX1                                                                                      | glutathione peroxidase 1                                                  | -0.25 | GAGGAACACCTTGATCTTACA  | Y00433:    | NM_000581;NM_201397:                           |
| 2877   | GPX2                                                                                      | glutathione peroxidase 2 (gastrointestinal)                               | -1.92 | CACCATGGCTTCATTGCCAA   | NM_002083: | NM_002083:                                     |
| 2877   | GPX2                                                                                      | glutathione peroxidase 2 (gastrointestinal)                               | -0.50 | AACCTCTGGTTGGTGTATCA   | NM_002083: | NM_002083:                                     |
| 2878   | GPX3 (glutathione peroxidase 3 (plasma))                                                  |                                                                           | -3.33 | CTGCTCTAACTGATACCTCAA  | NM_002084: | NM_002084:                                     |
| 2878   | GPX3 (glutathione peroxidase 3 (plasma))                                                  |                                                                           | 1.16  | TTCACTTAACTAAACCCAA    | NM_002084: | NM_002084:                                     |
| 2879   | GPX4                                                                                      | glutathione peroxidase 4 (phospholipid hydroperoxidase)                   | -0.06 | AGGGAGTAAACGAAGATCAA   | NM_002085: | NM_002085:                                     |
| 2879   | GPX4                                                                                      | glutathione peroxidase 4 (phospholipid hydroperoxidase)                   | 0.01  | GTGGATGAAGATCCAACCCAA  | NM_002085: | NM_002085:                                     |
| 2880   | GPX5 (glutathione peroxidase 5 (epididymal androgen-related protein))                     |                                                                           | -2.24 | CAGCAATATCTCGAAGTAA    | NM_001509: | NM_001509:                                     |
| 2880   | GPX5 (glutathione peroxidase 5 (epididymal androgen-related protein))                     |                                                                           | 0.40  | TCCACTTAAATGAATGAAT    | NM_001509: | NM_001509;NM_003996:                           |
| 257202 | GPX6 (glutathione peroxidase 6 (olfactory))                                               |                                                                           | 1.32  | CCCAGAAAGTTGTGCACATCA  | NM_182701: | NM_182701:                                     |
| 257202 | GPX6 (glutathione peroxidase 6 (olfactory))                                               |                                                                           | 1.02  | CAGACTACTCTGTGTCCTTAA  | NM_182701: | NM_182701:                                     |
| 2882   | GPX7                                                                                      | glutathione peroxidase 7                                                  | 2.26  | CAACAATACCTCAGCATATA   | NM_015696: | NM_015696:                                     |
| 2882   | GPX7                                                                                      | glutathione peroxidase 7                                                  | 0.86  | TGGCAATAGAAGTATATCAA   | NM_015696: | NM_015696:                                     |
| 9402   | GRAP2                                                                                     | GRB2-related adaptor protein 2                                            | -0.32 | AGGCATGAGGATGACGTTCAA  | NM_004810: | NM_004810:                                     |
| 9402   | GRAP2                                                                                     | GRB2-related adaptor protein 2                                            | 1.66  | CACAGTTAATGGATCTGTAAA  | NM_004810: | NM_004810:                                     |
| 160622 | GRASP (GRF GRP1 (general receptor for phosphoinositides 1)-associated scaffold protein 1) |                                                                           | 0.24  | AAACTCTATATGGGACATCAA  | NM_181711: | NM_181711:                                     |
| 160622 | GRASP (GRF GRP1 (general receptor for phosphoinositides 1)-associated scaffold protein 1) |                                                                           | -0.30 | GTGCATATTGTGCTCTGAAA   | NM_181711: | NM_181711:                                     |
| 2887   | GRB10                                                                                     | growth factor receptor-bound protein 10                                   | 0.48  | CTACCGTATAGTAACACTGTA  | NM_005311: | NM_005311;NM_01001549;NM_01001550;NM_01001555: |
| 2887   | GRB10                                                                                     | growth factor receptor-bound protein 10                                   | -0.77 | CTAGTAGCGGGAACACCCAAA  | NM_005311: | NM_005311;NM_01001549;NM_01001550;NM_01001555: |
| 2885   | GRB2                                                                                      | growth factor receptor-bound protein 2                                    | 1.03  | AGGCTTAAAGCTCCAGCTTTA  | NM_002086: | NM_002086;NM_203506:                           |
| 2885   | GRB2                                                                                      | growth factor receptor-bound protein 2                                    | -0.49 | CCCGTGAACCCGGAACGCTCAA | NM_002086: | NM_002086;NM_203506:                           |
| 2886   | GRB7 (growth factor receptor-bound protein 7)                                             |                                                                           | -0.93 | CACACTGGTATATCCCATGAA  | NM_005310: | NM_005310;NM_01030002:                         |
| 2886   | GRB7 (growth factor receptor-bound protein 7)                                             |                                                                           | -0.12 | CCCAACAAGCTTCCGAATGGA  | NM_005310: | NM_01030002;NM_005310:                         |
| 9380   | GRHPR                                                                                     | glyoxylate reductase/hydroxypyruvate reductase                            | -0.52 | CACATTGGTGTGGGACACATT  | NM_012203: | NM_012203:                                     |
| 9380   | GRHPR                                                                                     | glyoxylate reductase/hydroxypyruvate reductase                            | -0.56 | AAGGTGTGATCTCTGAGGAA   | NM_012203: | NM_012203:                                     |
| 2890   | GRIA1                                                                                     | glutamate receptor, ionotropic, AMPA 1                                    | -2.62 | CACCATGAAGTGGGAGGTAA   | NM_000827: | NM_000827:                                     |
| 2890   | GRIA1                                                                                     | glutamate receptor, ionotropic, AMPA 1                                    | 1.95  | CAGCATCCGAAAGATTGGTAA  | NM_000827: | NM_000827:                                     |
| 2891   | GRIA2                                                                                     | glutamate receptor, ionotropic, AMPA 2                                    | -2.52 | ACGAATGAAGTGGCAAGAAA   | NM_000826: | NM_000826:                                     |
| 2891   | GRIA2                                                                                     | glutamate receptor, ionotropic, AMPA 2                                    | 1.29  | TCCGATGTTATGATGAAGAA   | NM_000826: | NM_000826:                                     |
| 2892   | GRIA3                                                                                     | glutamate receptor, ionotropic, AMPA 3                                    | 0.79  | CAGAATTAATGTCACATACAGA | NM_000828: | NM_007325;NM_000828:                           |
| 2892   | GRIA3                                                                                     | glutamate receptor, ionotropic, AMPA 3                                    | 1.18  | ATGACGATGAGCAAAATTATA  | NM_000828: | NM_007325;NM_000828:                           |
| 2893   | GRIA4                                                                                     | glutamate receptor, ionotropic, AMPA 4                                    | 0.08  | CGCCAAAGGTTCCCTCAATTA  | NM_000829: | NM_000829:                                     |
| 2893   | GRIA4                                                                                     | glutamate receptor, ionotropic, AMPA 4                                    | -0.28 | CACGATGAAGTGGGAGGAAA   | NM_000829: | NM_000829:                                     |
| 2894   | GRID1                                                                                     | glutamate receptor, ionotropic, delta 1                                   | 1.82  | TTGGATTAAGTTGTTTAATA   | XM_043613: | NM_017551:                                     |
| 2894   | GRID1                                                                                     | glutamate receptor, ionotropic, delta 1                                   | 0.06  | CTCCAAGGATGACTTATAAA   | XM_043613: | NM_017551:                                     |
| 2895   | GRID2                                                                                     | glutamate receptor, ionotropic, delta 2                                   | 1.51  | CTGGCAGAAATTGATTATATT  | NM_001510: | NM_001510:                                     |
| 2895   | GRID2                                                                                     | glutamate receptor, ionotropic, delta 2                                   | -0.04 | CACGATTACAAATGGGATCAA  | NM_001510: | NM_001510:                                     |
| 2897   | GRK1                                                                                      | glutamate receptor, ionotropic, kinase 1                                  | 1.30  | ACGATTTAGAAATGTGGTAAA  | NM_000830: | NM_000830:                                     |
| 2897   | GRK1                                                                                      | glutamate receptor, ionotropic, kinase 1                                  | 1.13  | TGGGATATACACCTTTAATA   | NM_000830: | NM_175611;NM_000830:                           |
| 2898   | GRK2                                                                                      | glutamate receptor, ionotropic, kinase 2                                  | 0.42  | TGCCAGGAGATGGAATATCAA  | NM_021956: | NM_021956;NM_175768:                           |
| 2898   | GRK2                                                                                      | glutamate receptor, ionotropic, kinase 2                                  | 1.58  | CGCTTTATGAGTCAATTTAAA  | NM_021956: | NM_021956;NM_175768:                           |
| 2899   | GRK3                                                                                      | glutamate receptor, ionotropic, kinase 3                                  | 0.85  | CCAGTGGTTCCTAATCTCTCA  | NM_000831: | NM_000831:                                     |
| 2899   | GRK3                                                                                      | glutamate receptor, ionotropic, kinase 3                                  | -4.20 | CAGCGTCTTCTCCTCTCTCAA  | NM_000831: | NM_000831:                                     |
| 2900   | GRK4                                                                                      | glutamate receptor, ionotropic, kinase 4                                  | 0.14  | CAGGGTGTGAATCCAACCTA   | NM_014619: | NM_014619:                                     |
| 2900   | GRK4                                                                                      | glutamate receptor, ionotropic, kinase 4                                  | 0.84  | CGCGTTCATATGGGACGCCAAA | NM_014619: | NM_014619:                                     |
| 2901   | GRK5                                                                                      | glutamate receptor, ionotropic, kinase 5                                  | -5.78 | CGGGAGATGGCCCTCAGCAA   | NM_002088: | NM_002088:                                     |
| 2901   | GRK5                                                                                      | glutamate receptor, ionotropic, kinase 5                                  | 0.45  | GAGGAGGACCATCGAGCTAAA  | NM_002088: | NM_002088:                                     |
| 2902   | GRIN1                                                                                     | glutamate receptor, ionotropic, N-methyl D-aspartate 1                    | -1.29 | CACGCTGGACTCGTTCATGCA  | NM_000832: | NM_000832:                                     |
| 2902   | GRIN1                                                                                     | glutamate receptor, ionotropic, N-methyl D-aspartate 1                    | 0.40  | CAAGGAGGAGTTCACAGTCAA  | NM_000832: | NM_007327;NM_021569;NM_000832:                 |
| 2903   | GRIN2A                                                                                    | glutamate receptor, ionotropic, N-methyl D-aspartate 2A                   | -0.04 | AGGGTGTATAGTATCTGTTA   | NM_000833: | NM_000833:                                     |
| 2903   | GRIN2A                                                                                    | glutamate receptor, ionotropic, N-methyl D-aspartate 2A                   | -0.16 | CACAGTGGCCATTGATGTTTA  | NM_000833: | NM_000833:                                     |
| 2904   | GRIN2B                                                                                    | glutamate receptor, ionotropic, N-methyl D-aspartate 2B                   | -7.71 | CGGGCGGTACATGCTCAGCAA  | NM_000834: | NM_000834:                                     |
| 2904   | GRIN2B                                                                                    | glutamate receptor, ionotropic, N-methyl D-aspartate 2B                   | -0.59 | CGCCGAGGATCATCCGCTCTA  | NM_000834: | NM_000834:                                     |
| 2905   | GRIN2C                                                                                    | glutamate receptor, ionotropic, N-methyl D-aspartate 2C                   | -1.12 | CTGACGAGATCAGCAGGGTAA  | NM_000835: | NM_000835:                                     |
| 2905   | GRIN2C                                                                                    | glutamate receptor, ionotropic, N-methyl D-aspartate 2C                   | -0.59 | CACCCACATGGTCAAGTTCAA  | NM_000835: | NM_000835:                                     |
| 2906   | GRIN2D                                                                                    | glutamate receptor, ionotropic, N-methyl D-aspartate 2D                   | 0.26  | GAGGATTTGGTCCCTCAACTA  | NM_000836: | NM_000836:                                     |
| 2906   | GRIN2D                                                                                    | glutamate receptor, ionotropic, N-methyl D-aspartate 2D                   | -0.68 | CGCTACTGTGCTGGTGCACAA  | NM_000836: | NM_000836:                                     |
| 116443 | GRIN3A                                                                                    | glutamate receptor, ionotropic, N-methyl-D-aspartate 3A                   | -0.25 | CACCCAGGGAATAACAACCTTA | NM_133445: | NM_133445:                                     |
| 116443 | GRIN3A                                                                                    | glutamate receptor, ionotropic, N-methyl-D-aspartate 3A                   | -0.51 | ACCGAGCGAAATACATCTTTA  | NM_133445: | NM_133445:                                     |
| 116444 | GRIN3B                                                                                    | glutamate receptor, ionotropic, N-methyl-D-aspartate 3B                   | -3.75 | CAGCGCGAGGGCTAGATCAA   | XM_290850: | NM_138690:                                     |
| 116444 | GRIN3B                                                                                    | glutamate receptor, ionotropic, N-methyl-D-aspartate 3B                   | 0.49  | TACACATGTCTCGGCACITTA  | XM_290850: | NM_138690:                                     |
| 2907   | GRINA                                                                                     | glutamate receptor, ionotropic, N-methyl D-aspartate-associated protein 1 | -1.62 | CGGGAGAATGTCTGGACCTA   | NM_000837: | NM_000837;NM_00109184:                         |
| 2907   | GRINA                                                                                     | glutamate receptor, ionotropic, N-methyl D-aspartate-associated protein 1 | -2.27 | CTGGACCTACTATGTCTCCTA  | NM_000837: | NM_000837;NM_00109184:                         |
| 23426  | GRIP1                                                                                     | glutamate receptor interacting protein 1                                  | 1.93  | CACGATGAGTTGAAATCATGA  | XM_290559: | XM_290559:                                     |
| 23426  | GRIP1                                                                                     | glutamate receptor interacting protein 1                                  | 1.42  | CTGGTTATTAGTAGAAACCCA  | XM_290559: | XM_290559:                                     |
| 80852  | GRIP2 (glutamate receptor interacting protein 2)                                          |                                                                           | -1.62 | CCACACATGTTGGATGTTAA   | XM_042936: | XM_042936:                                     |
| 80852  | GRIP2 (glutamate receptor interacting protein 2)                                          |                                                                           | -0.55 | TAGGGTGGTCTTCTATTCTAA  | XM_042936: | XM_042936:                                     |
| 56850  | GRIPAP1                                                                                   | GRIP1 associated protein 1                                                | 0.21  | GAGGACCTTATGGGACGAGAA  | NM_020137: | NM_207672;NM_020137:                           |
| 56850  | GRIPAP1                                                                                   | GRIP1 associated protein 1                                                | -1.65 | CGGAGAGCGCCATCATTTGA   | NM_020137: | NM_020137:                                     |
| 6011   | GRK1                                                                                      | G protein-coupled receptor kinase 1                                       | -0.06 | CCAGATGAAGCGGACCGGCAA  | NM_002929: | NM_002929:                                     |
| 6011   | GRK1                                                                                      | G protein-coupled receptor kinase 1                                       | -1.14 | CTGGAAAGACATCGAGGACTA  | NM_002929: | NM_002929:                                     |
| 2868   | GRK4                                                                                      | G protein-coupled receptor kinase 4                                       | 0.24  | CAGGATGTTACTACCAAGAAA  | NM_182982: | NM_001004056;NM_001004057;NM_182982:           |
| 2868   | GRK4                                                                                      | G protein-coupled receptor kinase 4                                       | 0.14  | CGGGTGTTCGAAAGACATCA   | NM_182982: | NM_001004056;NM_182982:                        |
| 2869   | GRK5                                                                                      | G protein-coupled receptor kinase 5                                       | 0.49  | AGCGTCATAACTAGAACTGAA  | NM_005308: | NM_005308:                                     |
| 2869   | GRK5                                                                                      | G protein-coupled receptor kinase 5                                       | 0.37  | CAGGAACAACCGGATAGGCAA  | NM_005308: | NM_005308:                                     |
| 2909   | GRL1                                                                                      | glucocorticoid receptor DNA binding factor 1                              | -0.88 | CAGCCTAAGGAGGAAACACTAA | NM_004491: | NM_024342;NM_004491:                           |
| 2909   | GRL1                                                                                      | glucocorticoid receptor DNA binding factor 1                              | -0.59 | CAGGATGTTCTGGGAGGAGAA  | NM_004491: | NM_024342;NM_004491:                           |
| 2911   | GRM1                                                                                      | glutamate receptor, metabotropic 1                                        | -5.27 | CCAGATTAAAGTTATACGGAA  | NM_000838: | NM_000838:                                     |
| 2911   | GRM1                                                                                      | glutamate receptor, metabotropic 1                                        | 0.27  | CGCCTCTCTGTGACAGTCAA   | NM_000838: | NM_000838:                                     |
| 2912   | GRM2                                                                                      | glutamate receptor, metabotropic 2                                        | -6.26 | CACCATCGAGCTGGCCTCTA   | NM_000839: | NM_000839:                                     |
| 2912   | GRM2                                                                                      | glutamate receptor, metabotropic 2                                        | -1.82 | CTACAAGGACTTTGTGCTCAA  | NM_000839: | NM_000839:                                     |
| 2913   | GRM3                                                                                      | glutamate receptor, metabotropic 3                                        | -1.39 | GTCTTGTGTAACAAATTTA    | NM_000840: | NM_000840:                                     |
| 2913   | GRM3                                                                                      | glutamate receptor, metabotropic 3                                        | 1.79  | TACGGTGGCAATATTATGTAA  | NM_000840: | NM_000840:                                     |
| 2914   | GRM4                                                                                      | glutamate receptor, metabotropic 4                                        | -2.02 | ACCAAGAACATTTCTAATAAA  | NM_000841: | NM_000841:                                     |
| 2914   | GRM4                                                                                      | glutamate receptor, metabotropic 4                                        | -1.02 | TAAGTACATCCGAAACGCTCAA | NM_000841: | NM_000841:                                     |
| 2915   | GRM5                                                                                      | glutamate receptor, metabotropic 5                                        | -0.81 | CGCCATCTATTGATGGCTCAA  | NM_000842: | NM_000842:                                     |
| 2915   | GRM5                                                                                      | glutamate receptor, metabotropic 5                                        | -0.82 | TACGATCCTATTGATGAGAA   | NM_000842: | NM_000842:                                     |
| 2916   | GRM6                                                                                      | glutamate receptor, metabotropic 6                                        | 0.89  | AGCGTATTGACTATGAGGAA   | NM_000843: | NM_000843:                                     |

|        |          |                                                                      |       |                         |            |                                          |
|--------|----------|----------------------------------------------------------------------|-------|-------------------------|------------|------------------------------------------|
| 2916   | GRM6     | glutamate receptor, metabotropic 6                                   | 0.60  | TTCCATGTTTACACAATTA     | NM_000843: | NM_000843:                               |
| 2917   | GRM7     | glutamate receptor, metabotropic 7                                   | -0.47 | CCCAGATTAGTATGCGATCAA   | NM_000844: | NM_181875:NM_181874:NM_000844:           |
| 2917   | GRM7     | glutamate receptor, metabotropic 7                                   | -0.62 | TGCGATTATCCGCATATTTGA   | NM_000844: | NM_181875:NM_181874:NM_000844:           |
| 2918   | GRM8     | glutamate receptor, metabotropic 8                                   | -0.53 | CAGGAGTATGCCCATCCCAT    | NM_000845: | NM_000845:                               |
| 2918   | GRM8     | glutamate receptor, metabotropic 8                                   | 0.80  | TTGGTTATATCGGGCTGTAA    | NM_000845: | NM_000845:                               |
| 2896   | GRN      | granulin                                                             | -0.37 | AAGGACACTTCTGCCATGATA   | NM_002087: | NM_002087:                               |
| 2896   | GRN      | granulin                                                             | -4.50 | CCAGAGTAAGTGCCCTCCAA    | NM_002087: | NM_001012479:NM_002087:                  |
| 2925   | GRPR     | (gastrin) gastrin-releasing peptide receptor                         | 0.39  | ACCATAGT TAGTATATATGTA  | NM_005314: | NM_005314:                               |
| 2925   | GRPR     | (gastrin) gastrin-releasing peptide receptor                         | 0.63  | CAAGATCTTCTGTACAGTCAA   | NM_005314: | NM_005314:                               |
| 83903  | GS2      | (germ cell associated 2 (haspin))                                    | 2.66  | CAGTCTGTTTAAAGTAAAGTAA  | NM_031965: | NM_031965:                               |
| 83903  | GS2      | (germ cell associated 2 (haspin))                                    | -0.03 | ACAGTCTGTTTAAAGTAAAGCTA | NM_031965: | NM_031965:                               |
| 2931   | GSK3A    | glycogen synthase kinase 3 alpha                                     | -0.20 | CAGGGAACATAGTCGCCATCAA  | NM_019884: | NM_019884:                               |
| 2931   | GSK3A    | glycogen synthase kinase 3 alpha                                     | 0.39  | CCGGGTGTAATAGATTGTTA    | NM_019884: | NM_019884:                               |
| 2932   | GSK3B    | (glyc) glycogen synthase kinase 3 beta                               | 0.33  | AACACTGTGCACGTTGGAA     | NM_002093: | NM_002093:                               |
| 2932   | GSK3B    | (glyc) glycogen synthase kinase 3 beta                               | 0.00  | CACTCAAGAACTGTCAAGTAA   | NM_002093: | NM_002093:                               |
| 2934   | GSN      | gelsolin (amyloidosis, Finnish type)                                 | 0.83  | AACGATGCCCTTGTCTGAAA    | NM_000177: | NM_198252:NM_000177:                     |
| 2934   | GSN      | gelsolin (amyloidosis, Finnish type)                                 | -1.29 | CAGCTACATCATTCTGTAGAA   | NM_000177: | NM_198252:NM_000177:                     |
| 2936   | GSR      | glutathione reductase                                                | -1.80 | ATGCTCTGTCTAACAAGGAA    | NM_000637: | NM_000637:                               |
| 2936   | GSR      | glutathione reductase                                                | 0.68  | CGGCATGATAAGTACTTTAGA   | NM_000637: | NM_000637:                               |
| 2937   | GSS      | glutathione synthetase                                               | 1.26  | GAGGTTGGAGGTAACAACCTA   | NM_000178: | NM_000178:                               |
| 2937   | GSS      | glutathione synthetase                                               | 0.32  | TCCGACGAACATTTGAAGATA   | NM_000178: | NM_000178:                               |
| 2938   | GSTA1    | glutathione S-transferase A1                                         | 1.07  | TTGCAACAATAAAGTACTTTA   | M25627:    | M25627:                                  |
| 2938   | GSTA1    | glutathione S-transferase A1                                         | 0.64  | TTGCAATACCAATGTTCTAAA   | M25627:    | NM_145740:                               |
| 2944   | GSTM1    | glutathione S-transferase M1                                         | 1.26  | CTGTACAATCCAGAAATTTGA   | X08020:    | NM_000561:NM_146421:                     |
| 2944   | GSTM1    | glutathione S-transferase M1                                         | 1.11  | TCCAGAATTTGAGAACTGAA    | X08020:    | NM_000561:NM_146421:                     |
| 9446   | GSTO1    | glutathione S-transferase omega 1                                    | 0.33  | CAGCAATAAAGCTATGCTGTA   | NM_004832: | NM_004832:                               |
| 9446   | GSTO1    | glutathione S-transferase omega 1                                    | 2.25  | CAGGAGTCAAGCAATAAAGCTA  | NM_004832: | NM_004832:                               |
| 2950   | GSTP1    | glutathione S-transferase pi                                         | -2.56 | CCAGATCTCCTCGCTGACTA    | NM_000852: | NM_000852:                               |
| 2950   | GSTP1    | glutathione S-transferase pi                                         | -0.46 | TCCTTTCTCCAGGACCAATAA   | NM_000852: | NM_000852:                               |
| 2954   | GSTZ1    | glutathione transferase zeta 1 (maleylacetoacetate isomerase)        | 0.43  | CGCGTGAATAITGGGGTGAA    | NM_001513: | NM_001513:NM_145870:NM_145871:           |
| 2954   | GSTZ1    | glutathione transferase zeta 1 (maleylacetoacetate isomerase)        | -3.27 | ACGGTCCCATCAATCTCATA    | NM_001513: | NM_001513:NM_145870:NM_145871:           |
| 2959   | GTF2B    | general transcription factor IIB                                     | -0.84 | ACGCTAAATCTTGAATACAA    | NM_001514: | NM_001514:                               |
| 2959   | GTF2B    | general transcription factor IIB                                     | 0.00  | TTGACGAATTTGGCAATCTA    | NM_001514: | NM_001514:                               |
| 2962   | GTF2F1   | general transcription factor IIF, polypeptide 1, 74kDa               | -0.30 | CCGGTCCGAGCCAGATCGGAA   | NM_002096: | NM_002096:                               |
| 2962   | GTF2F1   | general transcription factor IIF, polypeptide 1, 74kDa               | 0.14  | CGCAAGATGATCAACGACAAA   | NM_002096: | NM_002096:                               |
| 2965   | GTF2H1   | general transcription factor IIH, polypeptide 1, 62kDa               | -2.16 | ATGGCACAGGGTAGACCTTAA   | NM_005316: | NM_005316:                               |
| 2965   | GTF2H1   | general transcription factor IIH, polypeptide 1, 62kDa               | 0.27  | CCAGAGCTGATGCTATTGTA    | NM_005316: | NM_005316:                               |
| 2966   | GTF2H2   | general transcription factor IIH, polypeptide 2, 44kDa               | 0.91  | CAAGATTTAAAGCCCTAATAGA  | NM_001515: | NM_001515:                               |
| 2966   | GTF2H2   | general transcription factor IIH, polypeptide 2, 44kDa               | 0.62  | TAGACTGACGTACTCTTAA     | NM_001515: | NM_001515:                               |
| 2967   | GTF2H3   | general transcription factor IIH, polypeptide 3, 34kDa               | -0.25 | TAGCAGATCTTGTGGGAA      | NM_001516: | NM_001516:                               |
| 2967   | GTF2H3   | general transcription factor IIH, polypeptide 3, 34kDa               | 0.56  | TGGAGTAATGGCAATATCAA    | NM_001516: | NM_001516:                               |
| 2968   | GTF2H4   | general transcription factor IIH, polypeptide 4, 52kDa               | -1.62 | AGCCACCCAGTGATGCTCAA    | BC004935:  | NM_001517:                               |
| 2968   | GTF2H4   | general transcription factor IIH, polypeptide 4, 52kDa               | 1.01  | TAATAAAGTTATGATAGCTAA   | BC004935:  | NM_001517:                               |
| 9569   | GTF2IRD1 | GTF2I repeat domain containing 1                                     | -0.11 | AAGGAACCTTCAACGAGAAA    | NM_005685: | NM_005685:NM_016328:                     |
| 9569   | GTF2IRD1 | GTF2I repeat domain containing 1                                     | 0.05  | CCGGAAGGAGCTACAGTCAA    | NM_005685: | NM_005685:NM_016328:                     |
| 23560  | GTPBP4   | GTP binding protein 4                                                | -0.05 | CTGGGAAGATTTACTGGTGTA   | NM_012341: | NM_012341:                               |
| 23560  | GTPBP4   | GTP binding protein 4                                                | 0.77  | AACGAAAGACTCCAACCGTTA   | NM_012341: | NM_012341:                               |
| 51512  | GTSE1    | G-2 and S-phase expressed 1                                          | -0.44 | CAAGTTCTAAGCCGCAACAAA   | NM_016426: | NM_016426:                               |
| 51512  | GTSE1    | G-2 and S-phase expressed 1                                          | 0.53  | TTCCGACCCCTTTGGACATAAA  | NM_016426: | NM_016426:                               |
| 2978   | GUCA1A   | guanylate cyclase activator 1A (retina)                              | -1.27 | CACCGATACAGTGTCTCCAA    | NM_000409: | NM_000409:                               |
| 2978   | GUCA1A   | guanylate cyclase activator 1A (retina)                              | -1.53 | CCAGGCCATTCCGCCATTTAA   | NM_000409: | NM_000409:                               |
| 2979   | GUCA1B   | guanylate cyclase activator 1B (retina)                              | 0.95  | CAACATTGGAGGGGAATTTA    | NM_002098: | NM_002098:                               |
| 2979   | GUCA1B   | guanylate cyclase activator 1B (retina)                              | -1.45 | CAAGCTGAAGTGGACATTTAA   | NM_002098: | NM_002098:                               |
| 2981   | GUCA2B   | guanylate cyclase activator 2B (uroguanylin)                         | 0.31  | CCAGCTGGAATCCATGAAGAA   | NM_007102: | NM_007102:                               |
| 2981   | GUCA2B   | guanylate cyclase activator 2B (uroguanylin)                         | -0.90 | CTGAATAAAGATTCTACAACA   | NM_007102: | NM_007102:                               |
| 2977   | GUCY1A2  | guanylate cyclase 1, soluble, alpha 2                                | 0.65  | CCCGTTTGTGATTGAACCAA    | NM_000855: | NM_000855:                               |
| 2977   | GUCY1A2  | guanylate cyclase 1, soluble, alpha 2                                | 0.62  | CAGGCAATGTAGCTGTCTTA    | NM_000855: | NM_000855:                               |
| 2982   | GUCY1A3  | guanylate cyclase 1, soluble, alpha 3                                | -0.78 | CAGGAATAGATTAGAACCTA    | NM_000856: | NM_000856:                               |
| 2982   | GUCY1A3  | guanylate cyclase 1, soluble, alpha 3                                | -0.07 | TCCAGTGGATTATCAAAAGAA   | NM_000856: | NM_000856:                               |
| 2974   | GUCY1B2  | guanylate cyclase 1, soluble, beta 2                                 | -1.14 | CCGATGTTCCAGAGGATCCAA   | NM_004129: | NM_004129:                               |
| 2974   | GUCY1B2  | guanylate cyclase 1, soluble, beta 2                                 | -2.94 | CAGTGTGCACGCACTATATA    | NM_004129: | NM_004129:                               |
| 2983   | GUCY1B3  | guanylate cyclase 1, soluble, beta 3                                 | -1.12 | ACCTAACATGGTGTCTGCAA    | NM_000857: | NM_000857:                               |
| 2983   | GUCY1B3  | guanylate cyclase 1, soluble, beta 3                                 | 0.98  | CAAGACTTTCTTATAGATATA   | NM_000857: | NM_000857:                               |
| 2984   | GUCY2C   | guanylate cyclase 2C (heat stable enterotoxin receptor)              | -0.38 | CTCAAGATCGATGATGACAAA   | NM_004963: | NM_004963:                               |
| 2984   | GUCY2C   | guanylate cyclase 2C (heat stable enterotoxin receptor)              | 0.28  | CCAGAACTCATCCCAACAAA    | NM_004963: | NM_004963:                               |
| 3000   | GUCY2D   | guanylate cyclase 2D, membrane (retina-specific)                     | 0.33  | CCGGGCCAGTTCTCTTGAGAA   | NM_000180: | NM_000180:                               |
| 3000   | GUCY2D   | guanylate cyclase 2D, membrane (retina-specific)                     | -0.19 | CTGGACCTTATCAAGGGAATA   | NM_000180: | NM_000180:                               |
| 2986   | GUCY2F   | guanylate cyclase 2F, retinal                                        | -2.25 | AAGGCAGTTGGTGAAGAACAA   | NM_001522: | NM_001522:                               |
| 2986   | GUCY2F   | guanylate cyclase 2F, retinal                                        | 0.69  | ACCGTTGTTGGAAACCATCTA   | NM_001522: | NM_001522:                               |
| 2987   | GUK1     | guanylate kinase 1                                                   | 0.11  | CAGGGCTGACATCTTAATAAA   | NM_000858: | NM_000858:                               |
| 2987   | GUK1     | guanylate kinase 1                                                   | 0.13  | CCCGGCCGAGGAGAACGGCAA   | NM_000858: | NM_000858:                               |
| 51454  | GULP1    | GULP, engulfment adaptor PTB domain containing 1                     | 0.59  | ACCCAGTACTGCTCAGTTTA    | NM_016315: | NM_016315:                               |
| 51454  | GULP1    | GULP, engulfment adaptor PTB domain containing 1                     | 0.02  | CTCCAGTACCTAGTAGATCTA   | NM_016315: | NM_016315:                               |
| 2990   | GUSB     | glucuronidase, beta                                                  | -2.99 | AACACTAAAGTGGAATAATA    | NM_000181: | NM_000181:                               |
| 2990   | GUSB     | glucuronidase, beta                                                  | -2.28 | CAGAGCGAGTATGGAGCAGAA   | NM_000181: | NM_000181:                               |
| 2995   | GYPC     | glycophorin C (Gerbich blood group)                                  | 0.87  | CAGCAGAAAGGAGTACTTTAT   | NM_016815: | NM_016815:NM_002101:                     |
| 2995   | GYPC     | glycophorin C (Gerbich blood group)                                  | -0.79 | CAGGAATGTGTCGACGAGAA    | NM_016815: | NM_016815:NM_002101:                     |
| 3001   | GZMA     | granzyme A (granzyme 1, cytotoxic T-lymphocyte-associated serine est | -0.15 | ACACGCGAAAGGTGACCTTAAA  | NM_006144: | NM_006144:                               |
| 3001   | GZMA     | granzyme A (granzyme 1, cytotoxic T-lymphocyte-associated serine est | -0.15 | ACCTGTGATTGGAATGAATA    | NM_006144: | NM_006144:                               |
| 3002   | GZMB     | granzyme B (granzyme 2, cytotoxic T-lymphocyte-associated serine est | 0.37  | CTGGAGCCAACTCCAGATTTA   | NM_004131: | NM_004131:                               |
| 3002   | GZMB     | granzyme B (granzyme 2, cytotoxic T-lymphocyte-associated serine est | 0.12  | TACGCCATTATTACGACAGTA   | NM_004131: | NM_004131:                               |
| 2999   | GZMH     | granzyme H (cathepsin G-like 2, protein h-CCPX)                      | -0.53 | CAGGGTTGCAGGACTGTAATA   | NM_033423: | NM_033423:                               |
| 2999   | GZMH     | granzyme H (cathepsin G-like 2, protein h-CCPX)                      | 0.92  | CTGGATAAAGAGAAACAATGAA  | NM_033423: | NM_033423:                               |
| 3003   | GZMK     | granzyme K (granzyme 3; trypsinase II)                               | 0.84  | TTCAGTGTATCACTGATGTA    | NM_002104: | NM_002104:                               |
| 3003   | GZMK     | granzyme K (granzyme 3; trypsinase II)                               | 0.29  | TTAGAGTTGGGTGAAGTAAA    | NM_002104: | NM_002104:                               |
| 3004   | GZMM     | granzyme M (lymphocyte met-ase 1)                                    | 0.43  | CCAATAAATCATAATGAAGAA   | NM_005317: | NM_005317:                               |
| 3004   | GZMM     | granzyme M (lymphocyte met-ase 1)                                    | 0.16  | CAGGAGGGGACCAATAATCA    | NM_005317: | NM_005317:                               |
| 3005   | H1FO     | H1 histone family, member 0                                          | 0.15  | ACCAAGTAAACCCAAAGCAAA   | NM_005318: | NM_005318:                               |
| 3005   | H1FO     | H1 histone family, member 0                                          | 0.71  | CAAGAAGGTAGCCACGCGAAA   | NM_005318: | NM_005318:                               |
| 94239  | H2AFV    | H2A histone family, member V                                         | -0.79 | ACCATCCTAAGTGAAGACTTA   | NM_012412: | NM_138635:                               |
| 94239  | H2AFV    | H2A histone family, member V                                         | 0.03  | ACCATGGTATATTGACTCTTA   | NM_012412: | NM_201436:NM_201516:NM_012412:NM_201517: |
| 3014   | H2AFX    | H2A histone family, member X                                         | -0.15 | CACGACTAGAACCCTAGGCAT   | NM_002105: | NM_002105:                               |
| 3014   | H2AFX    | H2A histone family, member X                                         | -0.11 | TGCCCTCCTAGGAGACATTTA   | NM_002105: | NM_002105:                               |
| 3015   | H2AFZ    | H2A histone family, member Z                                         | 0.36  | AAGGTATATCCCAACTAAA     | NM_002106: | NM_002106:                               |
| 3015   | H2AFZ    | H2A histone family, member Z                                         | 1.26  | CTCAGGACTCTAAATACTCTA   | NM_002106: | NM_002106:                               |
| 113457 | H2-ALPHA | alpha-tubulin isotype H2-alpha                                       | 1.42  | TCCAAGTTGTTTGCATTTAAA   | XM_054284: | NM_080386:                               |
| 113457 | H2-ALPHA | alpha-tubulin isotype H2-alpha                                       | 0.89  | TTCCAAGTTGTTTGCATTTAAA  | XM_054284: | NM_080386:                               |
| 3026   | HABP2    | hyaluronan binding protein 2                                         | -0.18 | CCCAATTTGACCTCTAGAAA    | NM_004132: | NM_004132:                               |

|        |         |                                                                               |       |                        |               |                                      |
|--------|---------|-------------------------------------------------------------------------------|-------|------------------------|---------------|--------------------------------------|
| 3026   | HABP2   | hyaluronan binding protein 2                                                  | 0.75  | CGGCATAAGCGGAGATCCAA   | NM_004132:    | NM_004132:                           |
| 57531  | HACE1   | (HEC HECT domain and ankyrin repeat containing, E3 ubiquitin protein ligase)  | -1.53 | TACGGTATATTGTATGAATTA  | NM_020771:    | NM_020771:                           |
| 57531  | HACE1   | (HEC HECT domain and ankyrin repeat containing, E3 ubiquitin protein ligase)  | -0.07 | AGGGCTGATGCTTCCAATTTA  | NM_020771:    | NM_020771:                           |
| 3028   | HADH2   | hydroxyacyl-Coenzyme A dehydrogenase, type II                                 | -0.90 | TGCGCTCTGGCTCAATAAAA   | NM_004493:    | NM_004493;NM_001037811:              |
| 3028   | HADH2   | hydroxyacyl-Coenzyme A dehydrogenase, type II                                 | -2.06 | CTGGGTGACCCCTGCTGAGTAT | NM_004493:    | NM_004493;NM_001037811:              |
| 3030   | HADHA   | hydroxyacyl-Coenzyme A dehydrogenase/3-ketoacyl-Coenzyme A thio               | -2.46 | CACGGTGATCCGGGATATTTAA | NM_000182:    | NM_000182:                           |
| 3030   | HADHA   | hydroxyacyl-Coenzyme A dehydrogenase/3-ketoacyl-Coenzyme A thio               | 0.93  | AAGGGCTCTTAGCTGCTGATAA | NM_000182:    | NM_000182:                           |
| 3029   | HAGH    | hydroxyacylglutathione hydrolase                                              | -0.86 | ACAAGTATTTATGCCATAAAA  | NM_005326:    | NM_005326:                           |
| 3029   | HAGH    | hydroxyacylglutathione hydrolase                                              | -0.98 | ATCGGACATTTCAATGCATAT  | NM_005326:    | NM_005326:                           |
| 3034   | HAL     | histidine ammonia-lyase                                                       | 1.15  | ATGCCTTAAATAGCCTTCATA  | NM_002108:    | NM_002108:                           |
| 3034   | HAL     | histidine ammonia-lyase                                                       | 1.20  | CCAGTTGACTTCTTTGGCTA   | NM_002108:    | NM_002108:                           |
| 9421   | HAND1   | heart and neural crest derivatives expressed 1                                | 0.68  | ACGCCGCTCTTCTCAATTTAA  | NM_004821:    | NM_004821:                           |
| 9421   | HAND1   | heart and neural crest derivatives expressed 1                                | 0.31  | GACGCCGCTCTTCTCAATTTAA | NM_004821:    | NM_004821:                           |
| 9464   | HAND2   | heart and neural crest derivatives expressed 2                                | -0.35 | CCGGCTGGGGCAATTCAGAAA  | NM_021973:    | NM_021973:                           |
| 9464   | HAND2   | heart and neural crest derivatives expressed 2                                | 0.22  | CCGGTTTATTTATGTCAATT   | NM_021973:    | NM_021973:                           |
| 3036   | HAS1    | hyaluronan synthase 1                                                         | -0.14 | CTGCTTATTTAATCTCCA     | NM_001523:    | NM_001523:                           |
| 3036   | HAS1    | hyaluronan synthase 1                                                         | -0.02 | CACGTACGTGTGGACGGCAA   | NM_001523:    | NM_001523:                           |
| 3037   | HAS2    | hyaluronan synthase 2                                                         | 0.11  | AACGCAATTTGGCTTGTCCAA  | NM_005328:    | NM_005328:                           |
| 3037   | HAS2    | hyaluronan synthase 2                                                         | -2.26 | CAGCTCGATCTAAGTGCCTTA  | NM_005328:    | NM_005328:                           |
| 8520   | HAT1    | (histone histone acetyltransferase 1)                                         | 0.76  | TACCGGGCTGTATTGAACGA   | NM_003642:    | NM_003642;NM_001033085:              |
| 8520   | HAT1    | (histone histone acetyltransferase 1)                                         | -0.39 | CCCTTCTAAACAGTATAATA   | NM_003642:    | NM_003642;NM_001033085:              |
| 26762  | HAVCR1  | hepatitis A virus cellular receptor 1                                         | 1.35  | CACCATTTGACTTCTACACAA  | NM_012206:    | NM_012206:                           |
| 26762  | HAVCR1  | hepatitis A virus cellular receptor 1                                         | 1.65  | GGCCTTTGGAATAACAATCAA  | NM_012206:    | NM_012206:                           |
| 84868  | HAVCR2  | hepatitis A virus cellular receptor 2                                         | -1.22 | TTGACAGAGAGTGGTCCCTAA  | NM_032782:    | NM_032782:                           |
| 84868  | HAVCR2  | hepatitis A virus cellular receptor 2                                         | -0.05 | CTGATATAAATCTAACACAAA  | NM_032782:    | NM_032782:                           |
| 1839   | HBEGF   | heparin-binding EGF-like growth factor                                        | 0.92  | GCCTTTAAATATATATTTA    | NM_001945:    | NM_001945:                           |
| 1839   | HBEGF   | heparin-binding EGF-like growth factor                                        | -0.16 | CTCCAGGATCTTTGACTGAAA  | NM_001945:    | NM_001945:                           |
| 51773  | HBXAP   | hepatitis B virus x associated protein                                        | -4.08 | ACGCACAAGATTGAGTCCAA   | NM_016578:    | NM_016578:                           |
| 51773  | HBXAP   | hepatitis B virus x associated protein                                        | -5.09 | CACCGAGTGGTACCATGAAA   | NM_016578:    | NM_016578:                           |
| 64151  | HCAP-G  | chromosome condensation protein G                                             | -0.08 | ATGTGGTCTATAAACGTGAA   | NM_022346:    | NM_022346:                           |
| 64151  | HCAP-G  | chromosome condensation protein G                                             | 0.30  | TAGGTCAACAATTTGATCTAA  | NM_022346:    | NM_022346:                           |
| 54985  | HCFC1R1 | host cell factor C1 regulator 1 (XPO1 dependent)                              | -0.31 | CAAGAAGAAGTGAATAAAGAT  | NM_001002017: | NM_001002017;NM_017885;NM_001002018: |
| 54985  | HCFC1R1 | host cell factor C1 regulator 1 (XPO1 dependent)                              | -1.95 | AACAGAGGACACTGAGCCCAA  | NM_001002017: | NM_001002017;NM_017885;NM_001002018: |
| 285834 | HCG22   | HLA complex group 22                                                          | 0.11  | CCCGAGGGAAGGTACGGAAATA | XM_496804:    | XM_496804:                           |
| 285834 | HCG22   | HLA complex group 22                                                          | -3.84 | AAGTCTGATCAAACTAATAAA  | XM_496804:    | XM_496804:                           |
| 3055   | HCK     | hemopoietic cell kinase                                                       | 0.40  | AACGACGGGCTCTGCCAGAAA  | NM_002110:    | NM_002110:                           |
| 3055   | HCK     | hemopoietic cell kinase                                                       | 0.17  | CGGAGACACATCAGAGGCTTA  | NM_002110:    | NM_002110:                           |
| 348980 | HCN1    | hyperpolarization activated cyclic nucleotide-gated potassium channel         | -0.42 | CCGACTAGATCGAATAGGAAA  | NM_021072:    | NM_021072:                           |
| 348980 | HCN1    | hyperpolarization activated cyclic nucleotide-gated potassium channel         | -4.18 | CACGGTGTGCTGGTGCATT    | NM_021072:    | NM_021072:                           |
| 610    | HCN2    | hyperpolarization activated cyclic nucleotide-gated potassium channel         | -0.47 | AACGACAGATTGGCCCAAAA   | NM_001194:    | NM_001194:                           |
| 610    | HCN2    | hyperpolarization activated cyclic nucleotide-gated potassium channel         | -1.14 | CGGGAAGAAGATGACTTCTAT  | NM_001194:    | NM_001194:                           |
| 610    | HCN2    | hyperpolarization activated cyclic nucleotide-gated potassium channel         | 0.46  | CGGCTTTGATCGAGGACAAA   | XM_370845:    | NM_001194;XM_370845;XM_370849:       |
| 610    | HCN2    | hyperpolarization activated cyclic nucleotide-gated potassium channel         | -0.29 | CCGCCAGAAGATCCACGACTA  | XM_370845:    | NM_001194;XM_370845;XM_370849:       |
| 57657  | HCN3    | hyperpolarization activated cyclic nucleotide-gated potassium channel         | -4.49 | CCCGCTTGGATGCTCTCAA    | NM_020897:    | NM_020897:                           |
| 57657  | HCN3    | hyperpolarization activated cyclic nucleotide-gated potassium channel         | -1.72 | CAGCTTCTGCCAACATGTAA   | NM_020897:    | NM_020897:                           |
| 10021  | HCN4    | (hyper) hyperpolarization activated cyclic nucleotide-gated potassium channel | 0.38  | TAGCAAGATCTGTATATGAAT  | NM_005477:    | NM_005477:                           |
| 10021  | HCN4    | (hyper) hyperpolarization activated cyclic nucleotide-gated potassium channel | -1.41 | AACCAGGTATTTCTAGAGCTA  | NM_005477:    | NM_005477:                           |
| 3060   | HCRT    | hypocretin (orexin) neuropeptide precursor                                    | 0.92  | CGGCATCCTCACGCTGGGCAA  | NM_001524:    | NM_001524:                           |
| 3060   | HCRT    | hypocretin (orexin) neuropeptide precursor                                    | -0.07 | CTGCCGACTGCTGCTGCTCAA  | NM_001524:    | NM_001524:                           |
| 3061   | HCRT1   | hypocretin (orexin) receptor 1                                                | -0.62 | ACGGCTCTTCTCACTGTGTA   | NM_001525:    | NM_001525:                           |
| 3061   | HCRT1   | hypocretin (orexin) receptor 1                                                | 0.00  | TTGCTTCTTTTGTGACCTTA   | NM_001525:    | NM_001525:                           |
| 3062   | HCRT2   | hypocretin (orexin) receptor 2                                                | -0.28 | ACCGACTATGACGACGAGGAA  | NM_001526:    | NM_001526:                           |
| 3062   | HCRT2   | hypocretin (orexin) receptor 2                                                | 0.85  | CCGGTGCAACATCGCTGTAA   | NM_001526:    | NM_001526:                           |
| 10870  | HCST    | hematopoietic cell signal transducer                                          | -2.02 | CCGCCCAAGAAGATGGGAAA   | NM_014266:    | NM_014266:                           |
| 10870  | HCST    | hematopoietic cell signal transducer                                          | -0.24 | CAGCAGGGTGACATCCGCTAT  | NM_014266:    | NM_014266;NM_001007469:              |
| 3064   | HD      | huntingtin (Huntington disease)                                               | -0.56 | CAGGGTGAAGATTGTTGGCAA  | NM_002111:    | NM_002111:                           |
| 3064   | HD      | huntingtin (Huntington disease)                                               | -0.15 | CAGGTGTTTATGGCTTGTGA   | NM_002111:    | NM_002111:                           |
| 3065   | HDAC1   | histone deacetylase 1                                                         | -0.04 | CACCCGAGGAAAGCTGTGTTA  | NM_004964:    | NM_004964:                           |
| 3065   | HDAC1   | histone deacetylase 1                                                         | 0.48  | CCCGTCTTAACTTTGAACCA   | NM_004964:    | NM_004964:                           |
| 83933  | HDAC10  | histone deacetylase 10                                                        | 0.07  | CAGGTGAACAGTGGTATAGCA  | NM_032019:    | NM_032019:                           |
| 83933  | HDAC10  | histone deacetylase 10                                                        | -0.86 | CGCCCTTGGCCGCTTAGTAAA  | NM_032019:    | NM_032019:                           |
| 79885  | HDAC11  | histone deacetylase 11                                                        | -2.03 | CCAGACAGGAGGAAACATAA   | NM_024827:    | NM_024827:                           |
| 79885  | HDAC11  | histone deacetylase 11                                                        | -0.54 | TAAGGTGGAGGAGAACATCAA  | NM_024827:    | NM_024827:                           |
| 3066   | HDAC2   | histone deacetylase 2                                                         | -0.16 | ACGGTCAATAAGACAGATAA   | NM_001527:    | NM_001527:                           |
| 3066   | HDAC2   | histone deacetylase 2                                                         | -0.59 | CTGGTTGTTTCAATCTAACA   | NM_001527:    | NM_001527:                           |
| 8841   | HDAC3   | histone deacetylase 3                                                         | 0.31  | GACCATGACAATGACAAGGAA  | NM_003883:    | NM_003883:                           |
| 8841   | HDAC3   | histone deacetylase 3                                                         | 0.38  | CAGGTAGTGGACTTCTACCAA  | NM_003883:    | NM_003883:                           |
| 9759   | HDAC4   | histone deacetylase 4                                                         | 0.52  | ACGGTTTATCTGATTGAGAA   | NM_006037:    | NM_006037:                           |
| 9759   | HDAC4   | histone deacetylase 4                                                         | 1.26  | CGGCATGACTTTATATTGTA   | NM_006037:    | NM_006037:                           |
| 10014  | HDAC5   | histone deacetylase 5                                                         | -0.07 | GCCGGTTTGTAGCTGTTGAA   | NM_005474:    | NM_001015053;NM_005474:              |
| 10014  | HDAC5   | histone deacetylase 5                                                         | 0.02  | CCGGGAGAAGTACAGAGCAA   | NM_005474:    | NM_001015053;NM_005474:              |
| 10013  | HDAC6   | histone deacetylase 6                                                         | -1.12 | CACCGTCAACGTGGCATGGAA  | NM_006044:    | NM_006044:                           |
| 10013  | HDAC6   | histone deacetylase 6                                                         | 0.68  | CACCTTGAAGCGAAATATTTAA | NM_006044:    | NM_006044:                           |
| 51564  | HDAC7A  | histone deacetylase 7A                                                        | 2.11  | AAGGCTGGAACAGAAACCCCA  | NM_015401:    | NM_015401;NM_015401:                 |
| 51564  | HDAC7A  | histone deacetylase 7A                                                        | 0.92  | CAGCAAGATCTCATTTGATA   | NM_015401:    | NM_015401;NM_015401:                 |
| 55869  | HDAC8   | histone deacetylase 8                                                         | -0.52 | AGGGACGGTACTACAGTGTAA  | NM_018486:    | NM_018486:                           |
| 55869  | HDAC8   | histone deacetylase 8                                                         | -0.54 | ACGGAATGTGCAAAGTAGCAA  | NM_018486:    | NM_018486:                           |
| 9734   | HDAC9   | histone deacetylase 9                                                         | 0.40  | CCGAAATATGAATGCTGTATT  | NM_058176:    | NM_178423;NM_178425;NM_058176:       |
| 9734   | HDAC9   | histone deacetylase 9                                                         | 0.59  | CAGCAACGACTTGAATTCAT   | NM_058176:    | NM_178423;NM_178425;NM_058176:       |
| 3067   | HDC     | (histidin histidine decarboxylase)                                            | 1.04  | CAGCTTGACATGATATATA    | NM_002112:    | NM_002112:                           |
| 3067   | HDC     | (histidin histidine decarboxylase)                                            | -0.37 | CCACAATAGGATACAACGAA   | NM_002112:    | NM_002112:                           |
| 25831  | HECTD1  | HECT domain containing 1                                                      | -0.78 | ATGCCACTACTGAAGATCAA   | NM_015382:    | NM_015382:                           |
| 25831  | HECTD1  | HECT domain containing 1                                                      | -1.35 | CAGACTGGTGTGAACAATTTAA | NM_015382:    | NM_015382:                           |
| 143279 | HECTD2  | HECT domain containing 2                                                      | -0.59 | TTGAATCATGTACAAGACTTA  | NM_182765:    | NM_182765:                           |
| 143279 | HECTD2  | HECT domain containing 2                                                      | 1.06  | ATGCACATTTGGCAGTAAACTA | NM_182765:    | NM_182765:                           |
| 79654  | HECTD3  | HECT domain containing 3                                                      | 0.33  | CCGGAGGATTTTCACTCTTTA  | NM_024602:    | NM_024602:                           |
| 79654  | HECTD3  | HECT domain containing 3                                                      | 0.01  | TGGGACATGTATGTACCCAAA  | NM_024602:    | NM_024602:                           |
| 57520  | HECW2   | HECT, C2 and WW domain containing E3 ubiquitin protein ligase 2               | -3.05 | CAGGATTTGGTGGCCCTTTCAA | XM_038999:    | NM_020760:                           |
| 57520  | HECW2   | HECT, C2 and WW domain containing E3 ubiquitin protein ligase 2               | -1.33 | AAGGCTCTTCTCAGAATTTCTA | XM_038999:    | NM_020760:                           |
| 57493  | HEG1    | HEG homolog 1 (zebrafish)                                                     | -3.88 | AACCTTCTGTGACAGAGTTTAA | XM_087386:    | XM_087386:                           |
| 57493  | HEG1    | HEG homolog 1 (zebrafish)                                                     | -0.22 | CAAGAAAGATCATTACAGAA   | XM_087386:    | XM_087386:                           |
| 51409  | HEMK1   | HemK methyltransferase family member 1                                        | 0.18  | ATCCACGTTCAATTAAGTAA   | NM_016173:    | NM_016173:                           |
| 51409  | HEMK1   | HemK methyltransferase family member 1                                        | -3.69 | CAGGGATTGATTAGTCTCTCCA | NM_016173:    | NM_016173:                           |
| 29104  | HEMK2   | HemK methyltransferase family member 2                                        | 1.50  | CAAGTAAATATGTGATTATA   | NM_013240:    | NM_182749;NM_013240:                 |
| 29104  | HEMK2   | HemK methyltransferase family member 2                                        | 1.14  | TTCTATTATTGTTAGCATTAAA | NM_013240:    | NM_182749;NM_013240:                 |
| 9843   | HEPH    | hephaestin                                                                    | 0.30  | AGGGAGTACCTTATTATCTCA  | NM_014799:    | NM_138737;NM_014799:                 |
| 9843   | HEPH    | hephaestin                                                                    | -2.93 | CAGGGATGAGGGCAATCTATA  | NM_014799:    | NM_138737;NM_014799:                 |
| 8925   | HERC1   | hect (homologous to the E6-AP (UBE3A) carboxyl terminus) domain a             | -0.05 | CGCAATCAAACTGACCCGCAA  | NM_003922:    | NM_003922:                           |



|        |           |                                                                      |       |                        |            |                                                                        |
|--------|-----------|----------------------------------------------------------------------|-------|------------------------|------------|------------------------------------------------------------------------|
| 8925   | HERC1     | hect (homologous to the E6-AP (UBE3A) carboxyl terminus) domain a    | 1.71  | TCCGAACGCTAGTTCGATTAA  | NM_003922: | NM_003922:                                                             |
| 8916   | HERC3     | hect domain and RLD 3                                                | 1.33  | AAGATTTAAGGACGTTCCTTA  | NM_014606: | NM_014606:                                                             |
| 8916   | HERC3     | hect domain and RLD 3                                                | -1.72 | CCCATGGCTCTGTACAAGAA   | NM_014606: | NM_014606:                                                             |
| 26091  | HERC4     | hect domain and RLD 4                                                | 0.45  | GAGGGAATTTGGATCCTAA    | NM_015601: | NM_015601;NM_022079;NM_001017972:                                      |
| 26091  | HERC4     | hect domain and RLD 4                                                | 0.02  | TAGAAATACTACATAGGGTAA  | NM_015601: | NM_015601;NM_022079;NM_001017972:                                      |
| 51191  | HERC5     | hect domain and RLD 5                                                | -1.28 | TGGAAGTAGCATACCTGTCAA  | NM_016323: | NM_016323:                                                             |
| 51191  | HERC5     | hect domain and RLD 5                                                | 0.88  | GAGGAGAATGGTAATGTTCAA  | NM_016323: | NM_016323:                                                             |
| 55008  | HERC6     | hect domain and RLD 6                                                | 0.96  | TTCGTGGATGTTCAAGTCAAA  | NM_017912: | NM_001013005;NM_001013002;NM_001013000;NM_017912:                      |
| 55008  | HERC6     | hect domain and RLD 6                                                | 0.08  | AAGATGCTCTGCGTCAATTA   | NM_017912: | NM_001013005;NM_001013002;NM_001013000;NM_017912:                      |
| 9709   | HERPUD1   | homocysteine-inducible, endoplasmic reticulum stress-inducible, ubiq | 0.98  | TACACTAAGTGTACTACTTTA  | NM_014685: | NM_001010990;NM_001010989;NM_014685:                                   |
| 9709   | HERPUD1   | homocysteine-inducible, endoplasmic reticulum stress-inducible, ubiq | -0.79 | CCCAACAATAACTTACAGGAA  | NM_014685: | NM_001010990;NM_001010989;NM_014685:                                   |
| 3280   | HES1      | hairly and enhancer of split 1, (Drosophila)                         | 1.03  | ACCATGCACATATTTGTATA   | NM_005524: | NM_005524:                                                             |
| 3280   | HES1      | hairly and enhancer of split 1, (Drosophila)                         | -0.25 | AAAGACGAAAGCAAGAATAA   | NM_005524: | NM_005524:                                                             |
| 57801  | HES4      | hairly a hairy and enhancer of split 4 (Drosophila)                  | 0.50  | AAACGTATTTATTTCCCAA    | NM_021170: | NM_021170:                                                             |
| 57801  | HES4      | hairly a hairy and enhancer of split 4 (Drosophila)                  | -0.23 | CTCCAAGCCGGTCAAGGAA    | NM_021170: | NM_021170:                                                             |
| 388585 | HES5      | hairly a hairy and enhancer of split 5 (Drosophila)                  | 1.34  | CAGCGAGATGAAGCTGCTGTA  | NM_371215: | NM_001010926:                                                          |
| 388585 | HES5      | hairly a hairy and enhancer of split 5 (Drosophila)                  | -0.02 | CAGCAGCATCGAGCAGCTGAA  | NM_371215: | NM_001010926:                                                          |
| 55502  | HES6      | hairly a hairy and enhancer of split 6 (Drosophila)                  | -1.36 | TTGGAGTTAGTTACCCTTGAA  | NM_018645: | NM_018645:                                                             |
| 55502  | HES6      | hairly a hairy and enhancer of split 6 (Drosophila)                  | 0.74  | TTCCATTGACATCAAAATGTGA | NM_018645: | NM_018645:                                                             |
| 8820   | HESX1     | homeobox, ES cell expressed 1                                        | -0.83 | CAGGAAAGATGGTAACTTAT   | NM_003865: | NM_003865:                                                             |
| 8820   | HESX1     | homeobox, ES cell expressed 1                                        | 1.58  | CAGGAAGATCCCAAGCCCTATA | NM_003865: | NM_003865:                                                             |
| 3073   | HEXA      | hexosaminidase A (alpha polypeptide)                                 | 0.24  | AAGGATTTCTACGTAGTGAA   | NM_000520: | NM_000520:                                                             |
| 3073   | HEXA      | hexosaminidase A (alpha polypeptide)                                 | 0.07  | GAGGTGTTTGATATAAAGTA   | NM_000520: | NM_000520:                                                             |
| 3074   | HEXB      | hexosaminidase B (beta polypeptide)                                  | -0.62 | CCGGCACAATAGTTGAAGTA   | NM_000521: | NM_000521:                                                             |
| 3074   | HEXB      | hexosaminidase B (beta polypeptide)                                  | 1.74  | TGGATATTGCAACCATATA    | NM_000521: | NM_000521:                                                             |
| 23462  | HEY1      | hairly/enhancer-of-split related with YRPW motif 1                   | 0.41  | CAGATTAAGTGTGTGATAAA   | NM_012258: | NM_012258:                                                             |
| 23462  | HEY1      | hairly/enhancer-of-split related with YRPW motif 1                   | 0.74  | TCACCTTAAAGTCGTGAGTAA  | NM_012258: | NM_012258:                                                             |
| 23493  | HEY2      | hairly/enhancer-of-split related with YRPW motif 2                   | 2.86  | AAGAGTCTTTACATCCACTA   | NM_012259: | NM_012259:                                                             |
| 23493  | HEY2      | hairly/enhancer-of-split related with YRPW motif 2                   | 2.39  | TCGATTTGTTAATGACAAA    | NM_012259: | NM_012259:                                                             |
| 26508  | HEYL      | hairly/e hairy/enhancer-of-split related with YRPW motif-like        | -0.15 | ATGGTTGTTGCGGACATCCA   | NM_014571: | NM_014571:                                                             |
| 26508  | HEYL      | hairly/e hairy/enhancer-of-split related with YRPW motif-like        | -1.16 | CTGGGATATTGGGAAGGAAA   | NM_014571: | NM_014571:                                                             |
| 3077   | HFE       | hemochromatosis                                                      | 1.19  | TAGTATTATTGTTGCATATA   | NM_000410: | NM_139002;NM_000410:                                                   |
| 3077   | HFE       | hemochromatosis                                                      | -0.42 | ACGTGGCTAGTCATAACCTTA  | NM_000410: | NM_139004;NM_000410:                                                   |
| 3081   | HGD       | homogentisate 1,2-dioxygenase (homogentisate oxidase)                | 0.35  | ACCCTACAAGTACAACCTGAA  | NM_000187: | NM_000187:                                                             |
| 3081   | HGD       | homogentisate 1,2-dioxygenase (homogentisate oxidase)                | -0.06 | CGGGAATATACACCCATCAA   | NM_000187: | NM_000187:                                                             |
| 3082   | HGF       | hepatocyte growth factor (hepapoietin A; scatter factor)             | -0.61 | AAGGTGATACCACCACTACAA  | NM_000601: | NM_001010932;NM_000601:                                                |
| 3082   | HGF       | hepatocyte growth factor (hepapoietin A; scatter factor)             | 0.67  | TGGGAGTACTGTGCAATATA   | NM_000601: | NM_001010931;NM_001010933;NM_001010932;NM_000601:                      |
| 3083   | HGFAC     | HGF activator                                                        | -1.79 | CACCCTGACTCGGTGTTCAA   | NM_001528: | NM_001528:                                                             |
| 3083   | HGFAC     | HGF activator                                                        | -0.01 | CCCTGCCTTGCTGACAATAA   | NM_001528: | NM_001528:                                                             |
| 9146   | HGS       | hepatocyte growth factor-regulated tyrosine kinase substrate         | -0.37 | CCGGAACGACCCCAAGTACAA  | NM_004712: | NM_004712:                                                             |
| 9146   | HGS       | hepatocyte growth factor-regulated tyrosine kinase substrate         | 0.23  | GCACGCTTTCCAGAATTCAA   | NM_004712: | NM_004712:                                                             |
| 3087   | HHEX      | homeobox, hematopoietically expressed                                | 1.68  | ATCTGTTTATCTCCCACTTAA  | NM_002729: | NM_002729:                                                             |
| 3087   | HHEX      | homeobox, hematopoietically expressed                                | -1.05 | CCCGGACGCGGTGAAGCACTA  | NM_002729: | NM_002729:                                                             |
| 10086  | HHLA1     | HERV-H LTR-associating 1                                             | -0.41 | CTCCAGCTAGATCATCAGTTA  | NM_005712: | NM_005712:                                                             |
| 10086  | HHLA1     | HERV-H LTR-associating 1                                             | 1.00  | AAGCATGTTAATGTTACCAT   | NM_005712: | NM_005712:                                                             |
| 55662  | HIF1AN    | hypoxia-inducible factor 1, alpha subunit inhibitor                  | 0.44  | AACACATAGGCTTGCGCTTAA  | NM_017902: | NM_017902:                                                             |
| 55662  | HIF1AN    | hypoxia-inducible factor 1, alpha subunit inhibitor                  | -4.15 | CAAGCTCAAGCCATACATAAA  | NM_017902: | NM_017902:                                                             |
| 64344  | HIF3A     | hypoxia inducible factor 3, alpha subunit                            | -0.26 | ACCAATCTCTATACACCATAA  | NM_022462: | NM_022462:                                                             |
| 64344  | HIF3A     | hypoxia inducible factor 3, alpha subunit                            | -0.64 | CGGGCGCACCCCTCAACCTCAA | NM_022462: | NM_022462;NM_152796;NM_152795;NM_152794:                               |
| 3092   | HIP1      | huntingtin interacting protein 1                                     | -2.97 | ATGGCTTAGGATCGACAAGAA  | NM_005338: | NM_005338:                                                             |
| 3092   | HIP1      | huntingtin interacting protein 1                                     | -3.66 | CACAACAATGGGTATCCTTAA  | NM_005338: | NM_005338:                                                             |
| 3093   | HIP2      | huntingtin interacting protein 2                                     | 0.73  | CAGGCAGTTCTATATATAGAA  | NM_005339: | NM_005339:                                                             |
| 3093   | HIP2      | huntingtin interacting protein 2                                     | 1.03  | CCGCACGGTATTATGTCATT   | NM_005339: | NM_005339:                                                             |
| 204851 | HIPK1     | homeodomain interacting protein kinase 1                             | -1.50 | AGGGAAGCTGTACACCACTAA  | NM_152696: | NM_152696;NM_198268;NM_198269;NM_181358:                               |
| 204851 | HIPK1     | homeodomain interacting protein kinase 1                             | -3.52 | CTGAGCTATGTTGTAATGCA   | NM_152696: | NM_198268;NM_198269;NM_181358:                                         |
| 28996  | HIPK2     | homeodomain interacting protein kinase 2                             | 0.61  | AACCAAGTACCCTACATATAA  | NM_022740: | NM_022740:                                                             |
| 28996  | HIPK2     | homeodomain interacting protein kinase 2                             | -0.38 | TCGCCAAGTCTCCATACATAA  | NM_022740: | NM_022740:                                                             |
| 10114  | HIPK3     | homeodomain interacting protein kinase 3                             | 0.91  | CACGTTTGCCAGGTAGTTAA   | NM_005734: | NM_005734:                                                             |
| 10114  | HIPK3     | homeodomain interacting protein kinase 3                             | -0.42 | CTCATCTGGTTGGAGATTA    | NM_005734: | NM_005734:                                                             |
| 147746 | HIPK4     | homeodomain interacting protein kinase 4                             | -5.98 | CAGAAGATAGTTATCCAGAA   | NM_144685: | NM_144685:                                                             |
| 147746 | HIPK4     | homeodomain interacting protein kinase 4                             | -0.58 | CACAATATTCTTACAGAAA    | NM_144685: | NM_144685:                                                             |
| 8348   | HIST1H2BO | histone 1, H2bo                                                      | -0.21 | CTCCAAGAAAGCCGTAACCAA  | NM_003527: | NM_003527:                                                             |
| 3098   | HK1       | hexokinase 1                                                         | 0.26  | CACGATGTAGTACCCCTACTA  | NM_000188: | NM_033496;NM_033497;NM_033498;NM_033500;NM_000188:                     |
| 3098   | HK1       | hexokinase 1                                                         | 0.00  | CCGTGTCGTATGACCTAGTAA  | NM_000188: | NM_000188:                                                             |
| 3099   | HK2       | hexokinase 2                                                         | 0.28  | CCGGCCGTGCTACAATAGGTA  | NM_000189: | NM_000189:                                                             |
| 3099   | HK2       | hexokinase 2                                                         | 0.88  | CGGCCGTGCTACAATAGGTA   | NM_000189: | NM_000189:                                                             |
| 3101   | HK3       | hexokinase 3 (white cell)                                            | 0.71  | CACCTAGGTTAGCAATATATA  | NM_002115: | NM_002115:                                                             |
| 3101   | HK3       | hexokinase 3 (white cell)                                            | 0.72  | CCGGAATGCGATGTCCTCTTA  | NM_002115: | NM_002115:                                                             |
| 80201  | HKDC1     | hexokinase domain containing 1                                       | 0.08  | AAGGATTTGTTAGTATAGGAA  | NM_025130: | NM_025130:                                                             |
| 80201  | HKDC1     | hexokinase domain containing 1                                       | -3.54 | CTCGATGTAGTGTGACATCCA  | NM_025130: | NM_025130:                                                             |
| 284459 | HKR1      | (GLI-Ki) GLI-Kruppel family member HKR1                              | -0.98 | AAGTCTTCCGCGAGAAGCTAA  | NM_181786: | NM_181786:                                                             |
| 284459 | HKR1      | (GLI-Ki) GLI-Kruppel family member HKR1                              | -1.75 | AGGCTTTACTTGGAAAGTCAA  | NM_181786: | NM_181786:                                                             |
| 342945 | HKR2      | GLI-Kruppel family member HKR2                                       | 0.57  | CAGGATATAAGTATGCTGAGA  | NM_181846: | NM_181846:                                                             |
| 342945 | HKR2      | GLI-Kruppel family member HKR2                                       | 1.60  | TAACCTAAGCTTATCTGTAA   | NM_181846: | NM_181846:                                                             |
| 3104   | HKR3      | GLI-Kruppel family member HKR3                                       | -3.92 | CCGCCCTTTGGGAAACTGAA   | NM_290331: | NM_005341:                                                             |
| 3110   | HLXB9     | homeobox HB9                                                         | -0.08 | ATCGCCCAAGTGGAAATGTA   | NM_005515: | NM_005515:                                                             |
| 3110   | HLXB9     | homeobox HB9                                                         | 1.51  | TGCATGCTAATTTATTTTAA   | NM_005515: | NM_005515:                                                             |
| 3145   | HMBS      | hydroxymethylbilane synthase                                         | -3.57 | CAGCTTAACGATGCCCAATTA  | NM_000190: | NM_000190;NM_001024382:                                                |
| 3145   | HMBS      | hydroxymethylbilane synthase                                         | -0.24 | CTCTTAAGATGGAGAGAAA    | NM_000190: | NM_000190;NM_001024382:                                                |
| 83872  | HMCN1     | hemicentin 1                                                         | -0.96 | CCGAGATATATGTTCCGCCAAA | NM_031935: | NM_031935:                                                             |
| 83872  | HMCN1     | hemicentin 1                                                         | 1.16  | TAGACTTAAGCAATTGCCAAA  | NM_031935: | NM_031935:                                                             |
| 10362  | HMG20B    | high-mobility group 20B                                              | -0.28 | CAGCATCCCTTTAGCTTTCAA  | NM_006339: | NM_006339:                                                             |
| 10362  | HMG20B    | high-mobility group 20B                                              | -1.05 | TCGGCGTTCGGCAAGATGAA   | NM_006339: | NM_006339:                                                             |
| 3159   | HMG1      | high mobility group AT-hook 1                                        | -2.97 | CACCACAACCTCCAGGAAGGAA | NM_002131: | NM_002131;NM_145901;NM_145902;NM_145899;NM_145903;NM_145904;NM_145905: |
| 3159   | HMG1      | high mobility group AT-hook 1                                        | -5.54 | CTGGACAAGGCTAACATCCCA  | NM_002131: | NM_002131;NM_145901;NM_145902;NM_145899;NM_145903;NM_145904;NM_145905: |
| 8091   | HMG2A     | high mobility group AT-hook 2                                        | 0.41  | ACCTCTGAATGTTACAACGAA  | NM_003483: | NM_001015886;NM_003483:                                                |
| 8091   | HMG2A     | high mobility group AT-hook 2                                        | -0.61 | TAGGAAGAACGCGGTGTGTA   | NM_003483: | NM_001015886;NM_003483:                                                |
| 3146   | HMG1      | high-mobility group box 1                                            | 1.29  | TAACTAATAATGCGAGTAA    | NM_002128: | NM_002128:                                                             |
| 3146   | HMG1      | high-mobility group box 1                                            | 1.42  | AAGAGTAATCAATCTACTCAA  | NM_002128: | NM_002128:                                                             |
| 3148   | HMG2      | high-mobility group box 2                                            | -0.54 | GAGGATTCGGTATGAGATAAA  | NM_002129: | NM_002129:                                                             |

|        |             |                                                                      |       |                        |            |                                          |
|--------|-------------|----------------------------------------------------------------------|-------|------------------------|------------|------------------------------------------|
| 3148   | HMGB2       | high-mobility group box 2                                            | 0.06  | TCGCTATGACAGGGAGATGAA  | NM_002129: | NM_002129:                               |
| 3155   | HMGC1       | 3-hydroxymethyl-3-methylglutaryl-Coenzyme A lyase (hydroxymethylgl)  | 0.75  | ATGGAAATGAGAATAGGTAA   | NM_000191: | NM_000191:                               |
| 3155   | HMGC1       | 3-hydroxymethyl-3-methylglutaryl-Coenzyme A lyase (hydroxymethylgl)  | 0.60  | CATGGAATGAGAATAGGTAA   | NM_000191: | NM_000191:                               |
| 3156   | HMGCR (3-h) | 3-hydroxy-3-methylglutaryl-Coenzyme A reductase                      | -0.85 | CCGAGCCTAATGAAAGGAA    | NM_000859: | NM_000859:                               |
| 3156   | HMGCR (3-h) | 3-hydroxy-3-methylglutaryl-Coenzyme A reductase                      | 1.10  | GAGCTTGTGTGAGAATGTTA   | NM_000859: | NM_000859:                               |
| 3157   | HMGS1       | 3-hydroxy-3-methylglutaryl-Coenzyme A synthase 1 (soluble)           | 0.55  | CTGATGTAGATTAATAATGTA  | NM_002130: | NM_002130:                               |
| 3157   | HMGS1       | 3-hydroxy-3-methylglutaryl-Coenzyme A synthase 1 (soluble)           | -5.04 | CAGGGCATTATTAGGCTATTT  | NM_002130: | NM_002130:                               |
| 3158   | HMGS2 (3-1) | 3-hydroxy-3-methylglutaryl-Coenzyme A synthase 2 (mitochondrial)     | 1.30  | CTGTCATGTGTAGAACITTA   | NM_005518: | NM_005518:                               |
| 3158   | HMGS2 (3-1) | 3-hydroxy-3-methylglutaryl-Coenzyme A synthase 2 (mitochondrial)     | 0.87  | TAGCTGGTAATGAAATTTGAA  | NM_005518: | NM_005518:                               |
| 3151   | HMGN2       | high-mobility group nucleosomal binding domain 2                     | 0.00  | GAGCCCGAGCAGTGTGAAGAA  | NM_005517: | NM_005517:                               |
| 3151   | HMGN2       | high-mobility group nucleosomal binding domain 2                     | 0.02  | TGGATACAGTTTGGCTTGAA   | NM_005517: | XM_498948;NM_005517:                     |
| 9324   | HMGN3       | high mobility group nucleosomal binding domain 3                     | -4.49 | AAGCAGGAAGCTGGAAGGAA   | NM_138730: | NM_004242;NM_138730:                     |
| 9324   | HMGN3       | high mobility group nucleosomal binding domain 3                     | -0.58 | CTGCTGACTATTTGTGGTTA   | NM_138730: | NM_004242;NM_138730:                     |
| 3161   | HMMR        | hyaluronan-mediated motility receptor (RHAMM)                        | 0.76  | CAGAAGAATTTGAGAATCTA   | NM_012484: | NM_012484;NM_012485:                     |
| 3161   | HMMR        | hyaluronan-mediated motility receptor (RHAMM)                        | -1.32 | CTGGATGAGCTTGATAAATTA  | NM_012484: | NM_012484;NM_012485:                     |
| 3162   | HMOX1       | heme oxygenase (decycling) 1                                         | -4.28 | CAGGCAATGGCCATAAATCCA  | NM_002133: | NM_002133:                               |
| 3162   | HMOX1       | heme oxygenase (decycling) 1                                         | -0.02 | CGGGCCAGCAACAAAGTGCAA  | NM_002133: | NM_002133:                               |
| 51617  | HMP19       | HMP19 protein                                                        | 1.03  | CTGGGAGAATGGTATTGTTA   | NM_015980: | NM_015980:                               |
| 51617  | HMP19       | HMP19 protein                                                        | -4.05 | CGAGCTAGGCTCATGTACAA   | NM_015980: | NM_015980:                               |
| 3172   | HNF4A       | hepatocyte nuclear factor 4, alpha                                   | -0.99 | AACCTAGAGATTTTACAGAA   | NM_000457: | NM_000457;NM_178849:                     |
| 3172   | HNF4A       | hepatocyte nuclear factor 4, alpha                                   | 0.06  | CACCTGGTCACGGCAAGGAA   | NM_000457: | NM_000457;NM_178849:                     |
| 3174   | HNF4G       | hepatocyte nuclear factor 4, gamma                                   | 0.16  | ACCTGTAAATTTATTCGTGTA  | NM_004133: | NM_004133:                               |
| 3174   | HNF4G       | hepatocyte nuclear factor 4, gamma                                   | -4.62 | CACCGATGGATTTCTGATGAA  | NM_004133: | NM_004133:                               |
| 3176   | HNMT        | histamine N-methyltransferase                                        | 1.09  | CAACATAACATAAGCTAGAAA  | NM_006895: | NM_006895:                               |
| 3176   | HNMT        | histamine N-methyltransferase                                        | 1.80  | TGCAGGCTCAACATAACATA   | NM_006895: | NM_006895:                               |
| 3181   | HNRP2B1     | heterogeneous nuclear ribonucleoprotein A2/B1                        | 0.56  | ATGGATTGGATTTATTAATA   | NM_002137: | NM_002137;NM_031243:                     |
| 3181   | HNRP2B1     | heterogeneous nuclear ribonucleoprotein A2/B1                        | 2.55  | TTGATTATTAATAACATTA    | NM_002137: | NM_002137;NM_031243:                     |
| 3184   | HNRPD       | heterogeneous nuclear ribonucleoprotein D (AU-rich element RNA bin   | -0.44 | AGCCATAAGATTATATGAA    | NM_002138: | NM_002138;NM_031369;NM_031370;NM_0010038 |
| 3184   | HNRPD       | heterogeneous nuclear ribonucleoprotein D (AU-rich element RNA bin   | 3.07  | CACAATTTGGTCTTAGTAAA   | NM_002138: | 10;                                      |
| 4670   | HNRPD       | heterogeneous nuclear ribonucleoprotein D (AU-rich element RNA bin   | -4.14 | CCGGATGATGAATGGCATGAA  | NM_005968: | NM_002138;NM_031369;NM_031370;NM_0010038 |
| 4670   | HNRPD       | heterogeneous nuclear ribonucleoprotein D (AU-rich element RNA bin   | -1.15 | CCCGAGGAATGGGAATGGAA   | NM_005968: | 10;                                      |
| 3192   | HNRPJ       | heterogeneous nuclear ribonucleoprotein U (scaffold attachment factc | -0.25 | AGGATATTATTGAATACCCAA  | NM_004501: | NM_031844;NM_004501:                     |
| 3192   | HNRPJ       | heterogeneous nuclear ribonucleoprotein U (scaffold attachment factc | -1.27 | CCGGCGTGGTAGTTACTCAA   | NM_004501: | NM_031844;NM_004501:                     |
| 11100  | HNRPUL1     | heterogeneous nuclear ribonucleoprotein U-like 1                     | -0.53 | AAGACCAGCAATAAAGCGAA   | NM_007040: | NM_144732;NM_144733;NM_007040:           |
| 11100  | HNRPUL1     | heterogeneous nuclear ribonucleoprotein U-like 1                     | 0.32  | CCCGCAAGAAACCGCAACTATA | NM_007040: | NM_144732;NM_144733;NM_007040:           |
| 221092 | HNRPUL2     | heterogeneous nuclear ribonucleoprotein U-like 2                     | -0.83 | ACGGGCGAGATTAGATACA    | XM_495877: | XM_495877:                               |
| 221092 | HNRPUL2     | heterogeneous nuclear ribonucleoprotein U-like 2                     | 1.39  | ACCCAGAATCTCCCAATGAAA  | XM_495877: | XM_495877:                               |
| 9456   | HOMER1      | homer homolog 1 (Drosophila)                                         | -0.74 | AAGCTACTAGATTCAGCTAA   | NM_004272: | NM_004272:                               |
| 9456   | HOMER1      | homer homolog 1 (Drosophila)                                         | 0.15  | ATCAATCACATCTTGATTCAA  | NM_004272: | NM_004272:                               |
| 9455   | HOMER2      | homer homolog 2 (Drosophila)                                         | 0.56  | ACCGAATATGACCTTACCACAA | NM_004839: | NM_004839;NM_199330;NM_199331;NM_199332: |
| 9455   | HOMER2      | homer homolog 2 (Drosophila)                                         | -4.84 | CAGAAGTCTACCTCTCAA     | NM_004839: | NM_004839;NM_199330;NM_199331;NM_199332: |
| 9454   | HOMER3      | homer homolog 3 (Drosophila)                                         | -0.83 | AGGGCCCAAGCCATCATCAA   | NM_004838: | NM_004838:                               |
| 9454   | HOMER3      | homer homolog 3 (Drosophila)                                         | -5.45 | CAGCTGGAAGCTCTGGTCAA   | NM_004838: | NM_004838:                               |
| 25900  | HOM-TES-10  | HOM-TES-103 tumor antigen-like                                       | 1.89  | CACGGCCAAAGCAGACATGAA  | NM_015438: | NM_080731;NM_015438;NM_080730:           |
| 25900  | HOM-TES-10  | HOM-TES-103 tumor antigen-like                                       | -3.78 | CAGAATGACAGGAAGGTGAA   | NM_015438: | NM_080731;NM_015438;NM_080730:           |
| 3198   | HOXA1       | homeobox A1                                                          | -0.16 | CAGCTCCTTATTATAATCAA   | NM_005522: | NM_005522;NM_153620:                     |
| 3198   | HOXA1       | homeobox A1                                                          | 0.06  | TAGGATGTCTGTAATAAATA   | NM_005522: | NM_005522;NM_153620:                     |
| 3229   | HOXC13      | homeobox C13                                                         | -2.99 | CGGGTGCAGAGAGATTTAA    | NM_017410: | NM_017410:                               |
| 3229   | HOXC13      | homeobox C13                                                         | -0.87 | CGGTTTGTACCAATACCAGAA  | NM_017410: | NM_017410:                               |
| 3236   | HOXD10      | homeobox D10                                                         | -0.49 | CAGGTACTATTATTGCGCA    | NM_002148: | NM_002148:                               |
| 3236   | HOXD10      | homeobox D10                                                         | 0.66  | CCCTTAGATATATATATATA   | NM_002148: | NM_002148:                               |
| 3238   | HOXD12      | homeobox D12                                                         | -0.10 | AACGCAAGAAATGTCCTCAA   | NM_021193: | NM_021193:                               |
| 3238   | HOXD12      | homeobox D12                                                         | 0.17  | AACGAATTCCTGCAACGAA    | NM_021193: | NM_021193:                               |
| 3239   | HOXD13      | homeobox D13                                                         | 0.26  | GCCAGTATAAAGGGACTTGA   | NM_000523: | NM_000523:                               |
| 3239   | HOXD13      | homeobox D13                                                         | 0.00  | ACGAACCTATCTGAGAGACAA  | NM_000523: | NM_000523:                               |
| 3240   | HP          | haptoglobin                                                          | -2.06 | CTGACCAAGCAATGCATAA    | NM_005143: | NM_005143:                               |
| 3240   | HP          | haptoglobin                                                          | -0.23 | AAGGTGTCTGTTAATGAGAGA  | NM_005143: | NM_005143:                               |
| 3242   | HPD         | 4-hydroxyphenylpyruvate dioxygenase                                  | 0.71  | CTGGTGGACTCAGCAGGAGAAA | NM_002150: | NM_002150:                               |
| 3242   | HPD         | 4-hydroxyphenylpyruvate dioxygenase                                  | 0.08  | CCAGGAATATGTTGACTATA   | NM_002150: | NM_002150:                               |
| 3248   | HPGD        | hydroxyprostaglandin dehydrogenase 15-(NAD)                          | -1.16 | CTGGCAGTACTAATCAGTAA   | NM_000860: | NM_000860:                               |
| 3248   | HPGD        | hydroxyprostaglandin dehydrogenase 15-(NAD)                          | -0.15 | CAAGAGCTCTTAGAGTAGTA   | NM_000860: | NM_000860:                               |
| 3249   | HPN         | hepsin (transmembrane protease, serine 1)                            | 0.93  | GGGATGCTCTTAAATAATA    | NM_002151: | NM_002151;NM_182983:                     |
| 3249   | HPN         | hepsin (transmembrane protease, serine 1)                            | 0.37  | CAGCCAGGAATCATTAACAA   | NM_002151: | NM_002151;NM_182983:                     |
| 3250   | HPR         | haptoglobin-related protein                                          | 0.01  | AAGGTGCTGTAAATGAGAGA   | NM_020995: | NM_020995:                               |
| 3250   | HPR         | haptoglobin-related protein                                          | -3.77 | CTGACCAATACGATTGCATAA  | NM_020995: | NM_020995:                               |
| 3251   | HPRT1       | hypoxanthine phosphoribosyltransferase 1 (Lesch-Nyhan syndrome)      | -0.64 | ATGGAGGGCCATCATTGTA    | NM_000194: | NM_000194:                               |
| 3251   | HPRT1       | hypoxanthine phosphoribosyltransferase 1 (Lesch-Nyhan syndrome)      | -0.74 | CACATTTAGTGAAACATTGA   | NM_000194: | NM_000194:                               |
| 55806  | HR          | hairless homolog (mouse)                                             | -0.51 | CTCCTCATGATTTCCATTAA   | NM_005144: | NM_018411;NM_005144:                     |
| 55806  | HR          | hairless homolog (mouse)                                             | -0.20 | GCGGACACATCGATAGGGAA   | NM_005144: | NM_018411;NM_005144:                     |
| 3265   | HRAS        | v-Ha-ras Harvey rat sarcoma viral oncogene homolog                   | -0.01 | AGGAGCGATGACGGAATATA   | NM_005343: | NM_005343;NM_176795:                     |
| 3265   | HRAS        | v-Ha-ras Harvey rat sarcoma viral oncogene homolog                   | 0.21  | CACAGATGGATCACAGTAAA   | NM_005343: | NM_005343;NM_176795:                     |
| 57110  | HRASLS      | HRAS-like suppressor                                                 | 0.57  | CAAAGAGATATTGATTTGAA   | NM_020386: | NM_020386:                               |
| 57110  | HRASLS      | HRAS-like suppressor                                                 | 1.05  | CAGGAGGTGGCCATAACTTA   | NM_020386: | NM_020386:                               |
| 54979  | HRASLS2     | HRAS-like suppressor 2                                               | 1.23  | CAGCTTAGTATGAATCTATT   | NM_017878: | NM_017878:                               |
| 54979  | HRASLS2     | HRAS-like suppressor 2                                               | 0.88  | CGGAAAGGCAATAAATCCAA   | NM_017878: | NM_017878:                               |
| 11145  | HRASLS3     | HRAS-like suppressor 3                                               | 1.67  | CCGGCCAGAAAGTTGTTAAA   | NM_007069: | NM_007069:                               |
| 11145  | HRASLS3     | HRAS-like suppressor 3                                               | 1.30  | TTCTTGTAAATGACATAATA   | NM_007069: | NM_007069:                               |
| 3269   | HRH1        | histamine receptor H1                                                | -2.48 | CAGGACCAAGAACTOGAA     | NM_000861: | NM_000861:                               |
| 3269   | HRH1        | histamine receptor H1                                                | 1.06  | TCCGAGTCAAGTGATTGACAA  | NM_000861: | NM_000861:                               |
| 3274   | HRH2        | histamine receptor H2                                                | -1.47 | CAGCCAGAGTCAAGTATTGA   | NM_022304: | NM_022304:                               |
| 3274   | HRH2        | histamine receptor H2                                                | -0.08 | TAGAAGGTGTCTTAAATTTA   | NM_022304: | NM_022304:                               |
| 11255  | HRH3        | histamine receptor H3                                                | 0.73  | CAGCATCTACTGAAACATCCA  | NM_007232: | NM_007232:                               |
| 11255  | HRH3        | histamine receptor H3                                                | -0.36 | TCCCTGACTACTGTTACGAAA  | NM_007232: | NM_007232:                               |
| 59340  | HRH4        | histamine receptor H4                                                | -0.06 | AAGAACCAGATGAATAGCAA   | NM_021624: | NM_021624:                               |
| 59340  | HRH4        | histamine receptor H4                                                | 0.53  | TACACTTATGCCTTACATTA   | NM_021624: | NM_021624:                               |
| 8739   | HRK         | harakiri, BCL2 interacting protein (contains only BH3 domain)        | -0.66 | AGGATCGTAGAAACACAGAA   | NM_003806: | NM_003806:                               |
| 8739   | HRK         | harakiri, BCL2 interacting protein (contains only BH3 domain)        | -3.01 | CGAGAAGGAAGTGGAGAGTAA  | NM_003806: | NM_003806:                               |
| 9957   | HS3ST1      | heparan sulfate (glucosamine) 3-O-sulfotransferase 1                 | -0.71 | TGGATCCACTTTGACCTCAA   | NM_005114: | NM_005114:                               |
| 9957   | HS3ST1      | heparan sulfate (glucosamine) 3-O-sulfotransferase 1                 | 0.94  | ATGGTTGTTAACAATTTGTAA  | NM_005114: | NM_005114:                               |
| 27292  | HSA9761     | dimethyladenosine transferase                                        | 0.44  | CTGGTCCAACTTATTATAAT   | NM_014473: | NM_014473:                               |
| 27292  | HSA9761     | dimethyladenosine transferase                                        | 0.32  | TGGGATGGCTTAGTAAGGATA  | NM_014473: | NM_014473:                               |
| 3290   | HSD11B1     | hydroxysteroid (11-beta) dehydrogenase 1                             | 0.76  | CACATAAACTTTATAAAATTA  | NM_005525: | NM_181755;NM_005525:                     |
| 3290   | HSD11B1     | hydroxysteroid (11-beta) dehydrogenase 1                             | 0.35  | GTGATGATTAATAACAATATA  | NM_005525: | NM_181755;NM_005525:                     |
| 3291   | HSD11B2     | hydroxysteroid (11-beta) dehydrogenase 2                             | 0.27  | CTGCATGGAGGTGAATTTCTT  | NM_000196: | NM_000196:                               |
| 3291   | HSD11B2     | hydroxysteroid (11-beta) dehydrogenase 2                             | -2.62 | CCGTAGTGCATGGAGGTGAA   | NM_000196: | NM_000196:                               |

|        |             |                                                                       |       |                         |            |                                |
|--------|-------------|-----------------------------------------------------------------------|-------|-------------------------|------------|--------------------------------|
| 3292   | HSD17B1     | hydroxysteroid (17-beta) dehydrogenase 1                              | -0.65 | CAGCTGTGGGTGGCTAATTA    | NM_000413: | NM_000413:                     |
| 3292   | HSD17B1     | hydroxysteroid (17-beta) dehydrogenase 1                              | -0.33 | ATCCAGAGCTTCAAAGTGTA    | NM_000413: | NM_000413:                     |
| 51144  | HSD17B12    | hydroxysteroid (17-beta) dehydrogenase 12                             | 0.44  | CACCAGTAGATTTGTATTA     | NM_016142: | NM_016142:                     |
| 51144  | HSD17B12    | hydroxysteroid (17-beta) dehydrogenase 12                             | -0.01 | TAAGTTGATCACTCAGAGTA    | NM_016142: | NM_016142:                     |
| 345275 | HSD17B13    | hydroxysteroid (17-beta) dehydrogenase 13                             | 0.56  | CTCCACTACATCAAGACTAA    | NM_178135: | NM_178135:                     |
| 345275 | HSD17B13    | hydroxysteroid (17-beta) dehydrogenase 13                             | 1.74  | TCCATCGATGATGGAGAGAAA   | NM_178135: | NM_178135:                     |
| 3294   | HSD17B2     | hydroxysteroid (17-beta) dehydrogenase 2                              | 0.01  | TGGGAATGTCATAGCTTGAA    | NM_002153: | NM_002153:                     |
| 3294   | HSD17B2     | hydroxysteroid (17-beta) dehydrogenase 2                              | -0.52 | CTCAAAGAGCTGGAAATGTCA   | NM_002153: | NM_002153:                     |
| 3293   | HSD17B3     | hydroxysteroid (17-beta) dehydrogenase 3                              | 0.94  | AAGAGTCATTGAATATGTCA    | NM_000197: | NM_000197:                     |
| 3293   | HSD17B3     | hydroxysteroid (17-beta) dehydrogenase 3                              | 0.61  | CTGCAATGACAAAGTATCTAA   | NM_000197: | NM_000197:                     |
| 3295   | HSD17B4     | hydroxysteroid (17-beta) dehydrogenase 4                              | -0.01 | GCACACTACACTTAATAAAA    | NM_000414: | NM_000414:                     |
| 3295   | HSD17B4     | hydroxysteroid (17-beta) dehydrogenase 4                              | -0.11 | AGAGCAGTACTTAGAGTTATA   | NM_000414: | NM_000414:                     |
| 8630   | HSD17B6     | hydroxysteroid (17-beta) dehydrogenase 6                              | 1.14  | CAGAGTACTAACATGTTTATA   | NM_003725: | NM_003725:                     |
| 8630   | HSD17B6     | hydroxysteroid (17-beta) dehydrogenase 6                              | 0.39  | CAAGCATATTAAGGAGACCTA   | NM_003725: | NM_003725:                     |
| 51478  | HSD17B7     | hydroxysteroid (17-beta) dehydrogenase 7                              | 0.67  | ATGGAATTCGCTCCGTTTA     | NM_016371: | NM_016371:                     |
| 7923   | HSD17B8     | hydroxysteroid (17-beta) dehydrogenase 8                              | 0.41  | AAACACCCATGACACAGAAAG   | NM_014234: | NM_014234:                     |
| 7923   | HSD17B8     | hydroxysteroid (17-beta) dehydrogenase 8                              | 0.10  | AATCTGAAGATAGTGATACA    | NM_014234: | NM_014234:                     |
| 3284   | HSD3B2      | hydroxy-delta-5-steroid dehydrogenase, 3 beta- and steroid delta-isom | 1.63  | ACAGTTCAACATAAAGAGCAA   | NM_000198: | NM_000198:                     |
| 3284   | HSD3B2      | hydroxy-delta-5-steroid dehydrogenase, 3 beta- and steroid delta-isom | 1.92  | AACAATTTGGTCTCTCTTAA    | NM_000198: | NM_000198:                     |
| 83693  | HSDL1       | hydroxysteroid dehydrogenase like 1                                   | 0.00  | AACCCCTACAAATACGCGTTAA  | NM_031463: | NM_031463:                     |
| 83693  | HSDL1       | hydroxysteroid dehydrogenase like 1                                   | 0.68  | TGGAATGAACATTTCTCTAGA   | NM_031463: | NM_031463:                     |
| 84263  | HSDL2       | hydroxysteroid dehydrogenase like 2                                   | -5.39 | CAGTTTCAATGATCGTAATA    | NM_032303: | NM_032303:                     |
| 84263  | HSDL2       | hydroxysteroid dehydrogenase like 2                                   | 0.77  | ACCCAGTTCATGAATCGCTAA   | NM_032303: | NM_032303:                     |
| 3299   | HSF4        | heat shock transcription factor 4                                     | -3.59 | CCGACTATCCCTGCACATAAA   | NM_001538: | NM_001538:                     |
| 3299   | HSF4        | heat shock transcription factor 4                                     | 0.05  | CAGAGCCGTTTCGCCAAGGAA   | NM_001538: | NM_001538:                     |
| 3320   | HSP90AA1    | heat shock protein 90kDa alpha (cytosolic), class A member 1          | 0.04  | CAGAATGAAGGAGAACACGAA   | NM_000534: | NM_001017963:NM_005348:        |
| 3320   | HSP90AA1    | heat shock protein 90kDa alpha (cytosolic), class A member 1          | 0.39  | CCGGTATGAAACTTTGACAGAA  | NM_000534: | NM_000534:                     |
| 3326   | HSP90AB1    | heat shock protein 90kDa alpha (cytosolic), class B member 1          | 0.91  | CCGCATCTATCGCATGATCAA   | NM_007355: | NM_007355:                     |
| 3326   | HSP90AB1    | heat shock protein 90kDa alpha (cytosolic), class B member 1          | -1.60 | CAAGATGATAAGGCAAGTAA    | NM_007355: | NM_007355:                     |
| 7184   | HSP90B1     | heat shock protein 90kDa beta (Gp94), member 1                        | -1.01 | AAGCTAATATCACTGACTGA    | NM_003299: | NM_003299:                     |
| 7184   | HSP90B1     | heat shock protein 90kDa beta (Gp94), member 1                        | 0.69  | ATGGATTAAATGCATCAAAA    | NM_003299: | NM_003299:                     |
| 51182  | HSPA14      | heat shock 70kDa protein 14                                           | -0.49 | CTCTATTGAGATAGCATCTTA   | NM_016299: | NM_016299:                     |
| 51182  | HSPA14      | heat shock 70kDa protein 14                                           | 0.92  | AATGGATTACGTGATATATTA   | NM_016299: | NM_016299:                     |
| 3308   | HSPA4       | heat shock 70kDa protein 4                                            | 0.49  | CAGACTATTATAAAGCTTTAA   | NM_198431: | NM_198431:NM_002154:           |
| 3308   | HSPA4       | heat shock 70kDa protein 4                                            | -1.76 | CAGGTATAAAGGTGACATATA   | NM_198431: | NM_198431:NM_002154:           |
| 3309   | HSPA5       | heat shock 70kDa protein 5 (glucose-regulated protein, 78kDa)         | -4.05 | TAGGTTGTGTGTTCCACCTTCA  | NM_005347: | NM_005347:                     |
| 3309   | HSPA5       | heat shock 70kDa protein 5 (glucose-regulated protein, 78kDa)         | 0.74  | TGGGATAAGGAAACACTTCTA   | NM_005347: | NM_005347:                     |
| 26353  | HSPB8       | heat shock 22kDa protein 8                                            | 0.90  | CCGCATGGTTTGGTTAATGAA   | NM_014365: | NM_014365:                     |
| 26353  | HSPB8       | heat shock 22kDa protein 8                                            | 1.64  | CGCATGGTTTGGTTAATGAAA   | NM_014365: | NM_014365:                     |
| 29070  | HSPC065     | HSPC065 protein                                                       | 0.01  | TAGAGTGTGTCACAGTTAAA    | NM_014157: | NM_014157:                     |
| 29070  | HSPC065     | HSPC065 protein                                                       | 0.53  | TCCGAGTTTGTCTTAACTGTA   | NM_014157: | NM_014157:                     |
| 51491  | HSPC111     | hypothetical protein HSPC111                                          | 0.09  | CGGGACCTCATTGACTATGTA   | NM_016391: | NM_016391:                     |
| 51491  | HSPC111     | hypothetical protein HSPC111                                          | 0.19  | TCGAGTAAAGATCAACCTCTA   | NM_016391: | NM_016391:                     |
| 3329   | HSPD1       | heat shock 60kDa protein 1 (chaperonin)                               | -0.97 | CACCACCAGATGAGAAGTTAA   | NM_002156: | NM_199440:NM_002156:           |
| 3329   | HSPD1       | heat shock 60kDa protein 1 (chaperonin)                               | -0.23 | CAGGTTTGGTGACAATAAGAA   | NM_002156: | NM_199440:NM_002156:           |
| 3336   | HSP1E       | heat shock 10kDa protein 1 (chaperonin 10)                            | -0.31 | AAGGGTGGAGAGATTCACCCA   | NM_002157: | NM_002157:XM_497331:XM_496430: |
| 3336   | HSP1E       | heat shock 10kDa protein 1 (chaperonin 10)                            | -0.63 | AGCGTGAAGTTGGAGATAAA    | NM_002157: | NM_002157:XM_370704:           |
| 3339   | HSPG2       | heparan sulfate proteoglycan 2 (perlecan)                             | -1.53 | ACGCTGGACCTGGAGTCCAA    | NM_005529: | NM_005529:                     |
| 3339   | HSPG2       | heparan sulfate proteoglycan 2 (perlecan)                             | -3.23 | CACCCGAGCCATGGATTTCAA   | NM_005529: | NM_005529:                     |
| 10524  | HTATIP      | HIV-1 Tat interacting protein, 60kDa                                  | -0.89 | CTGATCGAGTTCAAGCTAGAA   | NM_006388: | NM_006388:NM_182709:NM_182710: |
| 10524  | HTATIP      | HIV-1 Tat interacting protein, 60kDa                                  | -5.49 | CACCACATTCGCTGTCTCTTA   | NM_006388: | NM_006388:NM_182709:NM_182710: |
| 10553  | HTATIP2     | HIV-1 Tat interactive protein 2, 30kDa                                | -0.15 | AACCGGAGAGTGTCTTAAA     | NM_006410: | NM_006410:                     |
| 10553  | HTATIP2     | HIV-1 Tat interactive protein 2, 30kDa                                | 0.08  | ATCGGTAATTCAGGCTCTAA    | NM_006410: | NM_006410:                     |
| 27037  | HTF9C       | Hpall tiny fragments locus 9C                                         | -0.23 | CCGGTGAAACGCCAGGACAAA   | NM_022727: | NM_022727:NM_182984:           |
| 27037  | HTF9C       | Hpall tiny fragments locus 9C                                         | -0.55 | CCAGATAACACCCATAAAGAA   | NM_022727: | NM_022727:NM_182984:           |
| 3350   | HTR1A       | 5-hydroxytryptamine (serotonin) receptor 1A                           | 0.34  | CCTGTTGGCGCCATAATCAA    | NM_000524: | NM_000524:                     |
| 3350   | HTR1A       | 5-hydroxytryptamine (serotonin) receptor 1A                           | 1.99  | CTGGTTCTCTATGGCGGCATA   | NM_000524: | NM_000524:                     |
| 3351   | HTR1B       | 5-hydroxytryptamine (serotonin) receptor 1B                           | 0.57  | CACAGTGTACCGGACCCGGAA   | NM_000863: | NM_000863:                     |
| 3351   | HTR1B       | 5-hydroxytryptamine (serotonin) receptor 1B                           | 0.74  | CGCGTGAGTACTCAGCTAAA    | NM_000863: | NM_000863:                     |
| 3352   | HTR1D       | 5-hydroxytryptamine (serotonin) receptor 1D                           | 0.07  | CACGAATGTCTCAGCTTTGTA   | NM_000864: | NM_000864:                     |
| 3352   | HTR1D       | 5-hydroxytryptamine (serotonin) receptor 1D                           | 0.00  | CTGATCTTCTTATAGATTAAA   | NM_000864: | NM_000864:                     |
| 3354   | HTR1E       | 5-hydroxytryptamine (serotonin) receptor 1E                           | -1.04 | CAGCATGGCTATAAGACCCAA   | NM_000865: | NM_000865:                     |
| 3354   | HTR1E       | 5-hydroxytryptamine (serotonin) receptor 1E                           | -0.75 | CAGGGCAACCTTCACTCAGAA   | NM_000865: | NM_000865:                     |
| 3355   | HTR1F       | 5-hydroxytryptamine (serotonin) receptor 1F                           | 1.29  | ACCCTAACACAGACTTTGATA   | NM_000866: | NM_000866:                     |
| 3355   | HTR1F       | 5-hydroxytryptamine (serotonin) receptor 1F                           | 0.90  | CTCAATTCCTTATAAATCCA    | NM_000866: | NM_000866:                     |
| 3356   | HTR2A       | 5-hydroxytryptamine (serotonin) receptor 2A                           | 0.00  | CCGCTTCAACTCCAGAACTAA   | NM_000621: | NM_000621:                     |
| 3356   | HTR2A       | 5-hydroxytryptamine (serotonin) receptor 2A                           | -2.42 | TGGGATTGAGTTGTTACTCTA   | NM_000621: | NM_000621:                     |
| 3357   | HTR2B       | 5-hydroxytryptamine (serotonin) receptor 2B                           | 0.30  | CCGGAATCAATGGCAGAGAA    | NM_000867: | NM_000867:                     |
| 3357   | HTR2B       | 5-hydroxytryptamine (serotonin) receptor 2B                           | 0.32  | TGGCATGGTTACAAATGCCCTTA | NM_000867: | NM_000867:                     |
| 3358   | HTR2C       | 5-hydroxytryptamine (serotonin) receptor 2C                           | 0.08  | CCCGGAGCATCTATAACATA    | NM_000868: | NM_000868:                     |
| 3358   | HTR2C       | 5-hydroxytryptamine (serotonin) receptor 2C                           | 0.37  | TGGTATGATGACAAATAGTAA   | NM_000868: | NM_000868:                     |
| 3359   | HTR3A       | 5-hydroxytryptamine (serotonin) receptor 3A                           | 0.73  | CAAGCTGTATTCCACATTTA    | NM_000869: | NM_000869:NM_213621:           |
| 3359   | HTR3A       | 5-hydroxytryptamine (serotonin) receptor 3A                           | 0.04  | TACGTGTATTCGGCATCAA     | NM_000869: | NM_000869:NM_213621:           |
| 9177   | HTR3B       | 5-hydroxytryptamine (serotonin) receptor 3B                           | -2.03 | CCGAGCCAGGATTTGTTCAA    | NM_006028: | NM_006028:                     |
| 170572 | HTR3C (5-hy | 5-hydroxytryptamine (serotonin) receptor 3, family member C           | -0.17 | AAGTCCGAATTAAGTATGATA   | NM_130770: | NM_130770:                     |
| 170572 | HTR3C (5-hy | 5-hydroxytryptamine (serotonin) receptor 3, family member C           | 0.23  | CAGCAGTGAAGTTCGAATTA    | NM_130770: | NM_130770:                     |
| 200909 | HTR3D       | 5-hydroxytryptamine (serotonin) receptor 3 family member D            | 0.22  | CCAGCCTGAATAGTCTCTCA    | NM_182537: | NM_182537:                     |
| 200909 | HTR3D       | 5-hydroxytryptamine (serotonin) receptor 3 family member D            | 0.26  | TAGTACGTCTCATCCATCAA    | NM_182537: | NM_182537:                     |
| 285242 | HTR3E       | 5-hydroxytryptamine (serotonin) receptor 3, family member E           | -0.27 | AAGCCTCAACAGCATATGTA    | NM_182589: | NM_182589:                     |
| 285242 | HTR3E       | 5-hydroxytryptamine (serotonin) receptor 3, family member E           | 2.01  | ACCATGAAGTGGACAGTAT     | NM_182589: | NM_182589:                     |
| 3360   | HTR4        | 5-hydroxytryptamine (serotonin) receptor 4                            | 0.04  | CAGAAGTCCCGGGAAGGTAAA   | NM_000870: | NM_000870:                     |
| 3360   | HTR4        | 5-hydroxytryptamine (serotonin) receptor 4                            | -0.65 | CAGCTTTGCTCTCAGATTA     | NM_000870: | NM_000870:                     |
| 3361   | HTR5A       | 5-hydroxytryptamine (serotonin) receptor 5A                           | -2.08 | CCTGATCTATACGGCTTTCAA   | NM_024012: | NM_024012:                     |
| 3361   | HTR5A       | 5-hydroxytryptamine (serotonin) receptor 5A                           | -0.01 | CTCGTCTTCGGAGTGCCTTA    | NM_024012: | NM_024012:                     |
| 3362   | HTR6        | 5-hydroxytryptamine (serotonin) receptor 6                            | -0.36 | CAGGAGGCTGCAAGTCTCTCA   | NM_000871: | NM_000871:                     |
| 3362   | HTR6        | 5-hydroxytryptamine (serotonin) receptor 6                            | 1.85  | CGCGCTCAATTTCTCAACAT    | NM_000871: | NM_000871:                     |
| 3363   | HTR7        | 5-hydroxytryptamine (serotonin) receptor 7 (adenylate cyclase-coupl   | -1.16 | CGCGCGGATGAGGACGTTAA    | NM_000872: | NM_000872:NM_019859:NM_019860: |
| 3363   | HTR7        | 5-hydroxytryptamine (serotonin) receptor 7 (adenylate cyclase-coupl   | 0.99  | CTGAAGTGACCGTATATATTA   | NM_000872: | NM_000872:NM_019859:NM_019860: |
| 5654   | HTRA1       | HtrA serine peptidase 1                                               | -1.36 | CGACGTGATAATCAGCATCAA   | NM_002775: | NM_002775:                     |
| 5654   | HTRA1       | HtrA serine peptidase 1                                               | 0.97  | AGCGTATAAATTAAGATAT     | NM_002775: | NM_002775:                     |
| 27429  | HTRA2       | HtrA serine peptidase 2                                               | 0.14  | CCCGATGTTTCAAGCATGGTGA  | NM_013247: | NM_013247:                     |
| 27429  | HTRA2       | HtrA serine peptidase 2                                               | -1.33 | CCGGAGGTCCTTACTCGAA     | NM_013247: | NM_145074:NM_013247:           |
| 94031  | HTRA3       | HtrA serine peptidase 3                                               | -3.85 | CCAGTGTTCCTGTACTGTA     | NM_053044: | NM_053044:                     |
| 94031  | HTRA3       | HtrA serine peptidase 3                                               | 1.63  | AGCAGTGGAAATTTATGTCAA   | NM_053044: | NM_053044:                     |
| 203100 | HTRA4       | HtrA serine peptidase 4                                               | -2.04 | TAGCGAGTTCTGGCAGAAATA   | NM_153692: | NM_153692:                     |
| 203100 | HTRA4       | HtrA serine peptidase 4                                               | 0.44  | CCCGCTOAGGAGGAATACAA    | NM_153692: | NM_153692:                     |
| 30811  | HUNK (horm  | hormonally upregulated Neu-associated kinase                          | -4.53 | CACGGGCAAGTGCCCTGTAA    | NM_014586: | NM_014586:                     |
| 30811  | HUNK (horm  | hormonally upregulated Neu-associated kinase                          | -0.52 | TCGGACCAAGATCAAAACCAA   | NM_014586: | NM_014586:                     |
| 3364   | HUS1 (HUS1  | HUS1 checkpoint homolog (S. pombe)                                    | 0.35  | ACCGACATCGACACACTGTA    | NM_004507: | NM_004507:                     |

|        |                |                                                                         |       |                        |            |                                |
|--------|----------------|-------------------------------------------------------------------------|-------|------------------------|------------|--------------------------------|
| 3364   | HUS1 (HUS1)    | HUS1 checkpoint homolog (S. pombe)                                      | 1.06  | AGCAATCACCTGTTATTGAA   | NM_004507: | NM_004507:                     |
| 10075  | HUWE1          | HECT, UBA and WWE domain containing 1                                   | 1.26  | CGGCTTTCCAGCAGTCGCTTA  | XM_497119: | NM_031407:                     |
| 10075  | HUWE1          | HECT, UBA and WWE domain containing 1                                   | -0.54 | CAGGTGTGGTACAGAGGAA    | XM_497119: | NM_031407:                     |
| 8692   | HYAL2          | hyaluronoglucosaminidase 2                                              | 1.52  | AAAGATGTGTATCGCCGGTTA  | NM_003773: | NM_003773:NM_033158:           |
| 8692   | HYAL2          | hyaluronoglucosaminidase 2                                              | -0.01 | CTGCCAGTACCTCAAAGATTA  | NM_003773: | NM_003773:NM_033158:           |
| 3375   | IAPP           | islet amyloid polypeptide                                               | 0.52  | CTGGTACTAAGAGGCTATTTA  | NM_000415: | NM_000415:                     |
| 3375   | IAPP           | islet amyloid polypeptide                                               | -0.07 | TTAGAGGACAATGTAACCTCTA | NM_000415: | NM_000415:                     |
| 3376   | IARS           | isoleucine-tRNA synthetase                                              | 0.72  | CACAGTAATCTCCACACTTAA  | NM_002161: | NM_002161:NM_013417:           |
| 3376   | IARS           | isoleucine-tRNA synthetase                                              | 0.27  | TGGGATAAAGTCCTTATTCAA  | NM_002161: | NM_002161:NM_013417:           |
| 55699  | IARS2          | isoleucine-tRNA synthetase 2, mitochondrial                             | -2.77 | AAGAGTCTTCTATAAAGTAA   | NM_018060: | NM_018060:                     |
| 55699  | IARS2          | isoleucine-tRNA synthetase 2, mitochondrial                             | 0.81  | ACCAGTACGACATATGTTTAA  | NM_018060: | NM_018060:                     |
| 127544 | IBRDC3         | IBR domain containing 3                                                 | 0.94  | CACAATTTCTACCAGATAAA   | NM_153341: | NM_153341:                     |
| 127544 | IBRDC3         | IBR domain containing 3                                                 | -0.18 | CAAGTGGACATTGAAGCCAAA  | NM_153341: | NM_153341:                     |
| 3381   | IBSP           | integrin-binding sialoprotein (bone sialoprotein, bone sialoprotein II) | -0.02 | ATGGTGGGTTTGAACTACAA   | NM_004967: | NM_004967:                     |
| 3381   | IBSP           | integrin-binding sialoprotein (bone sialoprotein, bone sialoprotein II) | 0.82  | AAGATGAGTACAGCTACTTTA  | NM_004967: | NM_004967:                     |
| 25998  | IBTK           | inhibitor of Bruton agammaglobulinemia tyrosine kinase                  | -1.35 | CAGATTGAGGAGCATGCCATA  | AB037838:  | NM_015525:                     |
| 25998  | IBTK           | inhibitor of Bruton agammaglobulinemia tyrosine kinase                  | 1.11  | TAGAAGAGTCAATACCCATA   | AB037838:  | NM_015525:                     |
| 3383   | ICAM1          | intercellular adhesion molecule 1 (CD54), human rhinovirus receptor     | -0.04 | CCATGAAACCGAACACACAA   | NM_000201: | NM_000201:                     |
| 3383   | ICAM1          | intercellular adhesion molecule 1 (CD54), human rhinovirus receptor     | -0.70 | CCAGCGAAGATCAAGAAATA   | NM_000201: | NM_000201:                     |
| 59082  | ICEBERG        | ICEBERG caspase-1 inhibitor                                             | 1.16  | AAGATATTCTCGTGAAGAAA   | NM_021571: | NM_021571:                     |
| 59082  | ICEBERG        | ICEBERG caspase-1 inhibitor                                             | 2.28  | CCAAGTCTTGCTGCAAAATTA  | NM_021571: | NM_021571:                     |
| 22858  | ICK            | intestinal cell (MAK-like) kinase                                       | 1.34  | ACCTAATGACTTGGTAAATTA  | NM_014920: | NM_014920:NM_016513:           |
| 22858  | ICK            | intestinal cell (MAK-like) kinase                                       | 1.34  | CTCAGTAATCTAGCTTATATA  | NM_014920: | NM_014920:NM_016513:           |
| 3397   | ID1            | inhibitor of DNA binding 1, dominant negative helix-loop-helix protein  | 1.02  | AGGAAATTCGTTTGTATTGTA  | NM_002165: | NM_002165:NM_181353:           |
| 3397   | ID1            | inhibitor of DNA binding 1, dominant negative helix-loop-helix protein  | -0.22 | TACAATGATCACCAGACTGAAA | NM_002165: | NM_002165:NM_181353:           |
| 3399   | ID3            | inhibitor of DNA binding 3, dominant negative helix-loop-helix protein  | 1.01  | AAAGCAAATTCGGAAGTTAA   | NM_002167: | NM_002167:                     |
| 3399   | ID3            | inhibitor of DNA binding 3, dominant negative helix-loop-helix protein  | 0.01  | CAGCGCTTCTCATTCTTTGA   | NM_002167: | NM_002167:                     |
| 3416   | IDE            | insulin-degrading enzyme                                                | -0.15 | AACACTGAGGTGCATATTTA   | NM_004969: | NM_004969:                     |
| 3416   | IDE            | insulin-degrading enzyme                                                | 1.06  | AAGCATATATGCGATCTCTTA  | NM_004969: | NM_004969:                     |
| 3423   | IDS            | iduronate 2-sulfatase (Hunter syndrome)                                 | -0.67 | TACGAAGACCATACATAATA   | NM_000202: | NM_000202:                     |
| 3423   | IDS            | iduronate 2-sulfatase (Hunter syndrome)                                 | 0.34  | CTGAGGCTAGTTAATCCAAA   | NM_000202: | NM_000202:                     |
| 3425   | IDUA           | iduronidase, alpha-L-                                                   | -1.15 | CAGGAAGCCATCGACCTTCAA  | NM_000203: | NM_000203:                     |
| 3425   | IDUA           | iduronidase, alpha-L-                                                   | -0.02 | CGGGACCGTCTCGAGAGCAA   | NM_000203: | NM_000203:                     |
| 8870   | IER3           | immediate early response 3                                              | 0.61  | AAGGAGAGCGCTGTTAATTTA  | NM_003897: | NM_052815:NM_003897:           |
| 8870   | IER3           | immediate early response 3                                              | -0.23 | TTGCTCTAATTAATATTTAT   | NM_003897: | NM_052815:NM_003897:           |
| 8519   | IFITM1         | interferon induced transmembrane protein 1 (9-27)                       | -1.07 | ACCATATTATGTTACAGATAA  | NM_003641: | NM_003641:                     |
| 8519   | IFITM1         | interferon induced transmembrane protein 1 (9-27)                       | -0.59 | CATAAGTAATTTGATCCTCAA  | NM_003641: | NM_003641:                     |
| 3439   | IFNA1          | interferon, alpha 1                                                     | 0.67  | AACTATGACCATGCTGATAAA  | NM_024013: | NM_024013:                     |
| 3439   | IFNA1          | interferon, alpha 1                                                     | 0.90  | AAACTGATTATCTATTTTAAA  | NM_024013: | NM_024013:                     |
| 3447   | IFNA13 (interf | interferon, alpha 13                                                    | -0.65 | CAGAAGCATCTGCAATATCTA  | NM_006900: | NM_006900:                     |
| 3448   | IFNA14         | interferon, alpha 14                                                    | 0.89  | CTCCTTTCTATCTATTTTATA  | NM_002172: | NM_002172:                     |
| 3448   | IFNA14         | interferon, alpha 14                                                    | -2.93 | CAGGAGGACTTTGATGCTCAT  | NM_002172: | NM_002172:                     |
| 3449   | IFNA16 (interf | interferon, alpha 16                                                    | -2.08 | CAGCACTGAATGACCTAGAAA  | NM_002173: | NM_002173:                     |
| 3451   | IFNA17         | interferon, alpha 17                                                    | -4.63 | CAGCACTGAATAACCTGGAAA  | NM_021268: | NM_021268:                     |
| 3440   | IFNA2          | interferon, alpha 2                                                     | 1.44  | CAATATTATATTCAGATATA   | NM_000605: | NM_000605:                     |
| 3440   | IFNA2          | interferon, alpha 2                                                     | -0.11 | CAGAATAACTGGTACACTTCA  | NM_000605: | NM_000605:                     |
| 3452   | IFNA21         | interferon, alpha 21                                                    | -0.17 | CACCGCATGAGTTGAATCAAA  | NM_002175: | NM_002175:                     |
| 3452   | IFNA21         | interferon, alpha 21                                                    | 0.03  | CTGATAGATCTAATTTCTAT   | NM_002175: | NM_002175:                     |
| 3441   | IFNA4          | interferon, alpha 4                                                     | 0.02  | AACCTAGAGCCGCAAGTTCAA  | NM_021068: | NM_021068:                     |
| 3441   | IFNA4          | interferon, alpha 4                                                     | 1.33  | ACAGAGCAAAGTCTTCAGAAA  | NM_021068: | NM_021068:                     |
| 3442   | IFNA5          | interferon, alpha 5                                                     | -0.79 | ATCCTTCTTTTATCAGCAAA   | NM_002169: | NM_002169:                     |
| 3442   | IFNA5          | interferon, alpha 5                                                     | -1.43 | ATGCAGGAGGTTGGAGTGGAA  | NM_002169: | NM_002169:                     |
| 3443   | IFNA6 (interf  | interferon, alpha 6                                                     | 0.76  | CATCAAGAACTTGCAAGAAA   | NM_021002: | NM_021002:                     |
| 3443   | IFNA6 (interf  | interferon, alpha 6                                                     | -0.03 | ATCCTCTTCTTCATCAAGAAA  | NM_021002: | NM_021002:                     |
| 3444   | IFNA7          | interferon, alpha 7                                                     | 0.42  | TAGCTAGTGATATTTGCAAA   | NM_021057: | NM_021057:                     |
| 3445   | IFNA8 (interf  | interferon, alpha 8                                                     | 0.17  | CTAATTGAACCTGACATTTAAA | NM_002170: | NM_002170:                     |
| 3445   | IFNA8 (interf  | interferon, alpha 8                                                     | 0.22  | AACACGAAATGATCTTTATA   | NM_002170: | NM_002170:                     |
| 3454   | IFNAR1         | interferon (alpha, beta and omega) receptor 1                           | 0.43  | CAGGACCTTATTTTCATTA    | NM_000629: | NM_000629:                     |
| 3454   | IFNAR1         | interferon (alpha, beta and omega) receptor 1                           | 0.84  | CTGGAATTTGCAATCACTGAAA | NM_000629: | NM_000629:                     |
| 3455   | IFNAR2         | interferon (alpha, beta and omega) receptor 2                           | -1.66 | AAGCACCATAGTGACACTGAAA | NM_000874: | NM_207584:NM_000874:NM_207585: |
| 3455   | IFNAR2         | interferon (alpha, beta and omega) receptor 2                           | -2.66 | CACAGTGATGAGGAAAGCAGTA | NM_000874: | NM_207584:NM_000874:NM_207585: |
| 3456   | IFNB1          | interferon, beta 1, fibroblast                                          | -0.94 | CAGGTACCTCCGAAAACCTGAA | NM_002176: | NM_002176:                     |
| 3456   | IFNB1          | interferon, beta 1, fibroblast                                          | -3.00 | CAGAGTGGAAATCCTAAGGAAA | NM_002176: | NM_002176:                     |
| 338376 | IFNE1          | interferon epsilon 1                                                    | 0.57  | AGGGATAAGTAGCATATTTGA  | NM_176891: | NM_176891:                     |
| 338376 | IFNE1          | interferon epsilon 1                                                    | 0.91  | TCAGTGAACCTTTGTATATAA  | NM_176891: | NM_176891:                     |
| 3458   | IFNG           | interferon, gamma                                                       | 1.39  | TCCTGTACTGCTCAGCTTAA   | NM_000619: | NM_000619:                     |
| 3458   | IFNG           | interferon, gamma                                                       | 1.20  | AAGAACGAGATGACTCTGAAA  | NM_000619: | NM_000619:                     |
| 3459   | IFNGR1         | interferon gamma receptor 1                                             | 0.80  | CAGCATCGCTTAAACTCGTA   | NM_000416: | NM_000416:                     |
| 3459   | IFNGR1         | interferon gamma receptor 1                                             | 1.70  | ACGGAAGTGAGATCCAGATA   | NM_000416: | NM_000416:                     |
| 3460   | IFNGR2         | interferon gamma receptor 2 (interferon gamma transducer 1)             | 1.55  | AGGCTTCCAAATGAGATTCAA  | NM_005534: | NM_005534:                     |
| 3460   | IFNGR2         | interferon gamma receptor 2 (interferon gamma transducer 1)             | 0.62  | TGGGCATTTAAGCAACATAT   | NM_005534: | NM_005534:                     |
| 56832  | IFNK           | interferon, kappa                                                       | 0.32  | CAAAATTTGGATCATGGTATA  | NM_020124: | NM_020124:                     |
| 56832  | IFNK           | interferon, kappa                                                       | 0.80  | CCCAATGTTATAGCCAAAGA   | NM_020124: | NM_020124:                     |
| 3467   | IFNW1 (interf  | interferon, omega 1                                                     | 1.04  | AAGACTCTTATTTCCGCTTTA  | NM_002177: | NM_002177:                     |
| 3467   | IFNW1 (interf  | interferon, omega 1                                                     | 2.36  | AACCATGTGTTTCCCTATTTAA | NM_002177: | NM_002177:                     |
| 55081  | IFT57          | intracellular transport 57 homolog (Chlamydomonas)                      | -0.06 | AAGCCTTTACACTGAATGTAA  | NM_018010: | NM_018010:                     |
| 55081  | IFT57          | intracellular transport 57 homolog (Chlamydomonas)                      | 0.96  | CATGGTATTATGATGGTTAA   | NM_018010: | NM_018010:                     |
| 3476   | IGBP1          | immunoglobulin (CD79A) binding protein 1                                | 0.30  | AACACTTTATAAACAATTTAA  | NM_001551: | NM_001551:                     |
| 3476   | IGBP1          | immunoglobulin (CD79A) binding protein 1                                | 1.83  | AACGAGGGCAAAGATGCTAAA  | NM_001551: | NM_001551:                     |
| 3479   | IGF1           | insulin-like growth factor 1 (somatomedin C)                            | -1.42 | ACGTAATACGTGAAAGCAAA   | M27544:    | M27544:                        |
| 3479   | IGF1           | insulin-like growth factor 1 (somatomedin C)                            | -0.16 | ATCAATAATGTTCTATAGAAA  | M27544:    | M27544:                        |
| 3480   | IGF1R          | insulin-like growth factor 1 receptor                                   | 0.00  | AACCTAATGACAACACTTAA   | NM_000875: | NM_000875:                     |
| 3480   | IGF1R          | insulin-like growth factor 1 receptor                                   | -2.04 | AGGATTGAGTTTCTCAACGAAA | NM_000875: | NM_000875:                     |
| 3481   | IGF2           | insulin-like growth factor 2 (somatomedin A)                            | -0.03 | CCCGTGTTCGGTTTGGCGACA  | NM_000612: | NM_000612:                     |
| 3481   | IGF2           | insulin-like growth factor 2 (somatomedin A)                            | 1.51  | CCGAACCAAAGTGATTAATT   | NM_000612: | NM_000612:                     |
| 3482   | IGF2R          | insulin-like growth factor 2 receptor                                   | -2.57 | ACGAGTCTCGTACTATATAA   | NM_000876: | NM_000876:                     |
| 3482   | IGF2R          | insulin-like growth factor 2 receptor                                   | -1.93 | CAGACCAGGCTTGCCTATATA  | NM_000876: | NM_000876:                     |
| 3483   | IGFALS         | insulin-like growth factor binding protein, acid labile subunit         | 0.84  | CAGCTTGAGGTGCTCAGCTATA | NM_004970: | NM_004970:                     |
| 3483   | IGFALS         | insulin-like growth factor binding protein, acid labile subunit         | 0.47  | CGCACTTCTCCTCAAGGACAAA | NM_004970: | NM_004970:                     |
| 3484   | IGFBP1         | insulin-like growth factor binding protein 1                            | 1.75  | TACACTGATATGTTGTTAA    | NM_000596: | NM_000596:NM_001013029:        |
| 3484   | IGFBP1         | insulin-like growth factor binding protein 1                            | -3.00 | AAGGAGGACGGTAACTTTGTA  | NM_000596: | NM_000596:NM_001013029:        |
| 3485   | IGFBP2         | insulin-like growth factor binding protein 2, 36kDa                     | 0.06  | ACAGTGAAGATGCTCTGAAA   | NM_000597: | NM_000597:                     |
| 3485   | IGFBP2         | insulin-like growth factor binding protein 2, 36kDa                     | 0.66  | CACACTGATTTATATTTGAAA  | NM_000597: | NM_000597:                     |
| 3486   | IGFBP3         | insulin-like growth factor binding protein 3                            | -0.11 | CAAGGTTAATGTGGAGCTCAA  | NM_000598: | NM_000598:NM_001013398:        |
| 3486   | IGFBP3         | insulin-like growth factor binding protein 3                            | 1.47  | CCAAAATAGTAAAGATCTATA  | NM_000598: | NM_000598:NM_001013398:        |
| 3488   | IGFBP5         | insulin-like growth factor binding protein 5                            | -8.49 | CCACCGCATCTCCGAGCTGAAA | NM_000599: | NM_000599:                     |
| 3488   | IGFBP5         | insulin-like growth factor binding protein 5                            | -1.14 | CTGCCAATTTGACCCGCAAA   | NM_000599: | NM_000599:                     |
| 285313 | IGSF10         | immunoglobulin superfamily, member 10                                   | 1.35  | CAGGCGTATATCACTGTATAA  | NM_178822: | NM_178822:                     |
| 285313 | IGSF10         | immunoglobulin superfamily, member 10                                   | -1.65 | ACGCATCAATTTAGGATACAA  | NM_178822: | NM_178822:                     |

|        |         |                                                                                  |        |                        |            |                                          |
|--------|---------|----------------------------------------------------------------------------------|--------|------------------------|------------|------------------------------------------|
| 84966  | IGSF21  | immunoglobulin superfamily, member 21                                            | 0.77   | CGCCGTGACTTTGAAGTGTA   | NM_032880: | NM_032880:                               |
| 84966  | IGSF21  | immunoglobulin superfamily, member 21                                            | -0.72  | CAGCGCTGAGTTCGACGGGAA  | NM_032880: | NM_032880:                               |
| 253559 | IGSF4D  | immunoglobulin superfamily, member 4D                                            | -2.57  | TAGGTATTACTAAACCAATA   | NM_153184: | NM_153184:                               |
| 253559 | IGSF4D  | immunoglobulin superfamily, member 4D                                            | -1.55  | CACAGTTGAATAATAACCTAA  | NM_153184: | NM_153184:                               |
| 3549   | IHH     | Indian hedgehog homolog (Drosophila)                                             | -0.20  | CTGGGTGATTAACGAGTCAAA  | XM_050846: | NM_002181:                               |
| 3549   | IHH     | Indian hedgehog homolog (Drosophila)                                             | 0.60   | CGGCTTTGACTGGGTGATTA   | XM_050846: | NM_002181:                               |
| 9807   | IHPK1   | inositol hexaphosphate kinase 1                                                  | -1.35  | AAGGTGGATTCGCCATGATT   | NM_153273: | NM_153273.NM_001006115:                  |
| 9807   | IHPK1   | inositol hexaphosphate kinase 1                                                  | -0.02  | CGGGAGATGGCGAAATGCGA   | NM_153273: | NM_153273.NM_001006115:                  |
| 51447  | IHPK2   | inositol hexaphosphate kinase 2                                                  | 2.42   | AAGCATCGGAACCAAGTACAAA | NM_016291: | NM_001005909.NM_016291:                  |
| 51447  | IHPK2   | inositol hexaphosphate kinase 2                                                  | 0.62   | TGGGAACCAAGTACAAATTTAT | NM_016291: | NM_001005909.NM_016291:                  |
| 117283 | IHPK3   | inositol hexaphosphate kinase 3                                                  | -6.46  | AAGACTGGTGGACAAGTGTA   | NM_054111: | NM_054111:                               |
| 117283 | IHPK3   | inositol hexaphosphate kinase 3                                                  | -6.60  | CTGAGTACGTTACCCAATTA   | NM_054111: | NM_054111:                               |
| 3550   | IK      | IK cytokine, down-regulator of HLA II                                            | -11.06 | CAGGCGCTCAAGGAACCAAA   | NM_006083: | NM_006083:                               |
| 3550   | IK      | IK cytokine, down-regulator of HLA II                                            | -8.59  | CAGCGAGTATAGAACACAAA   | NM_006083: | NM_006083:                               |
| 8518   | IKBKAP  | inhibitor of kappa light polypeptide gene enhancer in B-cells, kinase $\alpha$   | -0.78  | CAGCGTTTTACTATAGACAAA  | NM_003640: | NM_003640:                               |
| 8518   | IKBKAP  | inhibitor of kappa light polypeptide gene enhancer in B-cells, kinase $\alpha$   | 1.14   | CGGTTTTACTATAGACAAAATA | NM_003640: | NM_003640:                               |
| 3551   | IKKB    | inhibitor of kappa light polypeptide gene enhancer in B-cells, kinase $\beta$    | -0.13  | CACACTGGAGCTCCTCCATTA  | NM_001556: | NM_001556:                               |
| 3551   | IKKB    | inhibitor of kappa light polypeptide gene enhancer in B-cells, kinase $\beta$    | 0.22   | CAGACCGACATTGGGACCTTA  | NM_001556: | NM_001556:                               |
| 9641   | IKBKE   | inhibitor of kappa light polypeptide gene enhancer in B-cells, kinase $\epsilon$ | -0.51  | ACGGCGAACAAAGGAGATCAT  | NM_014002: | NM_014002:                               |
| 9641   | IKBKE   | inhibitor of kappa light polypeptide gene enhancer in B-cells, kinase $\epsilon$ | 0.26   | CGCATCATCGAACCGCTAAA   | NM_014002: | NM_014002:                               |
| 8517   | IKBK    | inhibitor of kappa light polypeptide gene enhancer in B-cells, kinase $\gamma$   | -1.13  | CTCCTCAGTTCAGAGACATA   | NM_003639: | NM_003639:                               |
| 8517   | IKBK    | inhibitor of kappa light polypeptide gene enhancer in B-cells, kinase $\gamma$   | -0.20  | TTCGAAATGCCTACACATA    | NM_003639: | NM_003639:                               |
| 3586   | IL10    | interleukin 10                                                                   | 0.85   | CCAGCTTGTATTTTAAACAA   | NM_000572: | NM_000572:                               |
| 3586   | IL10    | interleukin 10                                                                   | -0.01  | CCCAACCACTTCATTCTTGAA  | NM_000572: | NM_000572:                               |
| 3587   | IL10RA  | interleukin 10 receptor, alpha                                                   | -1.34  | CCCGCAAATGACACATATGAA  | NM_001558: | NM_001558:                               |
| 3587   | IL10RA  | interleukin 10 receptor, alpha                                                   | -0.89  | CGCAGTGACCTTGGACCTGTA  | NM_001558: | NM_001558:                               |
| 3588   | IL10RB  | interleukin 10 receptor, beta                                                    | 1.55   | ATGGACTTATAATGCAATA    | NM_000628: | NM_000628:                               |
| 3588   | IL10RB  | interleukin 10 receptor, beta                                                    | 0.57   | CAGCTCAGTACCTAAGTTATA  | NM_000628: | NM_000628:                               |
| 3589   | IL11    | interleukin 11                                                                   | -1.24  | CAAGGTCAGATGGTTCATTA   | NM_000641: | NM_000641:                               |
| 3589   | IL11    | interleukin 11                                                                   | -0.39  | CCCATAGGCTTCAATAAATA   | NM_000641: | NM_000641:                               |
| 3590   | IL11RA  | interleukin 11 receptor, alpha                                                   | 0.22   | CAGGTGTGAATAAAGAGAATA  | NM_004512: | NM_004512:                               |
| 3590   | IL11RA  | interleukin 11 receptor, alpha                                                   | 0.32   | AAGGAACGCTGTGTAATGTGTA | NM_004512: | NM_004512:                               |
| 3592   | IL12A   | interleukin 12A (natural killer cell stimulatory factor 1, cytotoxic lymph       | 1.34   | AGGGAAATATTTTAAAGCTA   | NM_000882: | NM_000882:                               |
| 3592   | IL12A   | interleukin 12A (natural killer cell stimulatory factor 1, cytotoxic lymph       | 0.61   | ACCATTGGAATTAACCAAGAA  | NM_000882: | NM_000882:                               |
| 3593   | IL12B   | interleukin 12B (natural killer cell stimulatory factor 2, cytotoxic lymph       | 0.19   | ATGGGCTCTCAGTCTATTTAA  | NM_002187: | NM_002187:                               |
| 3593   | IL12B   | interleukin 12B (natural killer cell stimulatory factor 2, cytotoxic lymph       | -0.66  | TAGATGCTAATGCTCATTTAA  | NM_002187: | NM_002187:                               |
| 3594   | IL12RB1 | interleukin 12 receptor, beta 1                                                  | 0.40   | TCGGATATCCAGTGATCGTTA  | NM_153701: | NM_153701.NM_005535:                     |
| 3594   | IL12RB1 | interleukin 12 receptor, beta 1                                                  | -0.83  | CAGCTCACAACCTAGTATAA   | NM_153701: | NM_153701.NM_005535:                     |
| 3595   | IL12RB2 | interleukin 12 receptor, beta 2                                                  | -0.61  | CAGGCGACACCTGGGAAGAATA | NM_001559: | NM_001559:                               |
| 3595   | IL12RB2 | interleukin 12 receptor, beta 2                                                  | 0.23   | CCGTGGACATTAGAATCAAA   | NM_001559: | NM_001559:                               |
| 3596   | IL13    | interleukin 13                                                                   | 1.29   | TTCATTGACTTCAAACTGAA   | NM_002188: | NM_002188:                               |
| 3596   | IL13    | interleukin 13                                                                   | 1.34   | AACAAGTTGTTTCACTTGACTA | NM_002188: | NM_002188:                               |
| 3597   | IL13RA1 | interleukin 13 receptor, alpha 1                                                 | -1.29  | AACCATGTTTGGCTATTAA    | NM_001560: | NM_001560:                               |
| 3597   | IL13RA1 | interleukin 13 receptor, alpha 1                                                 | 0.68   | CTCAGTGATGGAGATAATTTA  | NM_001560: | NM_001560:                               |
| 3598   | IL13RA2 | interleukin 13 receptor, alpha 2                                                 | 0.65   | TACCATTTGGTTTCATCTTAA  | NM_000640: | NM_000640:                               |
| 3598   | IL13RA2 | interleukin 13 receptor, alpha 2                                                 | 0.31   | CAGGATATGAGTTGGGTATAT  | NM_000640: | NM_000640:                               |
| 3600   | IL15    | interleukin 15                                                                   | 0.89   | CCCATACAAGCTGATTTGTA   | NM_000585: | NM_000585.NM_172174:                     |
| 3600   | IL15    | interleukin 15                                                                   | -0.96  | CAGCTCTTCTCAACTCTTAA   | NM_000585: | NM_000585.NM_172175.NM_172174:           |
| 3601   | IL15RA  | interleukin 15 receptor, alpha                                                   | 0.20   | CCCAAGCTCTCTGTCAATTA   | NM_002189: | NM_172200.NM_002189:                     |
| 3601   | IL15RA  | interleukin 15 receptor, alpha                                                   | -3.02  | CCGAGCTAAGTCCGAGTGAA   | NM_002189: | NM_172200.NM_002189:                     |
| 3603   | IL16    | interleukin 16 (lymphocyte chemoattractant factor)                               | 0.63   | CACAATAGTAACCTGGGTAAA  | NM_004513: | NM_004513.NM_172217:                     |
| 3603   | IL16    | interleukin 16 (lymphocyte chemoattractant factor)                               | -0.83  | GTGCTCTTAACCTACCATATA  | NM_004513: | NM_004513.NM_172217:                     |
| 3605   | IL17    | interleukin 17 (cytotoxic T-lymphocyte-associated serine esterase 8)             | 0.02   | ACGAACCTTAAAGTATGAGAAA | NM_002190: | NM_002190:                               |
| 3605   | IL17    | interleukin 17 (cytotoxic T-lymphocyte-associated serine esterase 8)             | -0.48  | CAGGCTTCCCTTGGAGATTA   | NM_002190: | NM_002190:                               |
| 27190  | IL17B   | interleukin 17B                                                                  | 0.03   | CCAGAGAAAGTGTGAGGTCAA  | NM_014443: | NM_014443:                               |
| 27190  | IL17B   | interleukin 17B                                                                  | -0.43  | CTGCTGTTTCTTACCACTT    | NM_014443: | NM_014443:                               |
| 27189  | IL17C   | interleukin 17C                                                                  | -0.09  | TACGTGTATTTAAACTGAT    | NM_013278: | NM_013278:                               |
| 27189  | IL17C   | interleukin 17C                                                                  | -0.27  | TAAGTGACGTGATATTTAA    | NM_013278: | NM_013278:                               |
| 53342  | IL17D   | interleukin 17D                                                                  | 0.30   | TGGGTGCTTGCACAAAGAGATA | NM_138284: | NM_138284:                               |
| 53342  | IL17D   | interleukin 17D                                                                  | -0.90  | TGGCTGGAAGCTGATGGGAAA  | NM_138284: | NM_138284:                               |
| 64806  | IL17E   | interleukin 17E                                                                  | 1.28   | ATAGAGATTTTCCAAATAAA   | NM_022789: | NM_172314.NM_022789:                     |
| 64806  | IL17E   | interleukin 17E                                                                  | 0.60   | GAAGCTGTTATGAATGTATA   | NM_022789: | NM_172314.NM_022789:                     |
| 112744 | IL17F   | interleukin 17F                                                                  | -0.09  | CAGTGCTAATATAAAGATA    | NM_052872: | NM_052872:                               |
| 112744 | IL17F   | interleukin 17F                                                                  | -0.49  | CACITTTATTTGATATCTAA   | NM_052872: | NM_052872:                               |
| 23765  | IL17R   | interleukin 17 receptor                                                          | 2.42   | CAGCGTCTGGTATCTGCTCTA  | NM_014339: | NM_014339:                               |
| 23765  | IL17R   | interleukin 17 receptor                                                          | 0.41   | CGGCACCTACGATGCTGCTA   | NM_014339: | NM_014339:                               |
| 55540  | IL17RB  | interleukin 17 receptor B                                                        | 0.53   | ACAAACAGCCTTGAATTA     | NM_018725: | NM_172234.NM_018725:                     |
| 55540  | IL17RB  | interleukin 17 receptor B                                                        | -0.97  | CGGCTTGTGAAGGCCACCAA   | NM_018725: | NM_172234.NM_018725:                     |
| 84818  | IL17RC  | interleukin 17 receptor C                                                        | 0.88   | ACCGCAGATCATTACCTTGAA  | NM_032732: | NM_032732.NM_153460.NM_153461.NM_153462: |
| 84818  | IL17RC  | interleukin 17 receptor C                                                        | -1.15  | CAGGTACGAGAAGAACTCAA   | NM_032732: | NM_153463:                               |
| 54756  | IL17RD  | interleukin 17 receptor D                                                        | -0.10  | CAGGAAGATACCTGCACTAAT  | NM_017563: | NM_017563:                               |
| 54756  | IL17RD  | interleukin 17 receptor D                                                        | -0.52  | CAGCAAGTTTATCGCCGTCTA  | NM_017563: | NM_017563:                               |
| 132014 | IL17RE  | interleukin 17 receptor E                                                        | 0.59   | CACAAGGCACTCGCTCTAAA   | NM_144640: | NM_144640.NM_153481.NM_153482.NM_153483: |
| 132014 | IL17RE  | interleukin 17 receptor E                                                        | 0.54   | CGGAAGATGAATAAAGACAA   | NM_144640: | NM_153480:                               |
| 3606   | IL18    | interleukin 18 (interferon-gamma-inducing factor)                                | -1.21  | ACGCTTTACTTTATAGCTGAA  | NM_001562: | NM_001562:                               |
| 3606   | IL18    | interleukin 18 (interferon-gamma-inducing factor)                                | 1.24   | CCCGAACCATATTTATATA    | NM_001562: | NM_001562:                               |
| 10068  | IL18BP  | interleukin 18 binding protein                                                   | 0.53   | ACCGATCAAGTCAACTCAGTA  | NM_005699: | NM_173042.NM_173043.NM_005699:           |
| 10068  | IL18BP  | interleukin 18 binding protein                                                   | -1.40  | CAGGATGTGGACGACTGGTA   | NM_005699: | NM_173042.NM_173043.NM_005699:           |
| 8809   | IL18R1  | interleukin 18 receptor 1                                                        | 0.98   | TTGCTATTGCTAGTCTCTAA   | NM_003855: | NM_003855:                               |
| 8809   | IL18R1  | interleukin 18 receptor 1                                                        | -0.80  | AAGAGTGAGATTTGTCAGTGA  | NM_003855: | NM_003855:                               |
| 8807   | IL18RAP | interleukin 18 receptor accessory protein                                        | -0.92  | CCAGCCTAAGGAATGGTGAA   | NM_003855: | NM_003855:                               |
| 8807   | IL18RAP | interleukin 18 receptor accessory protein                                        | -1.82  | CCAGTATCTTTGAACCTACAA  | NM_003855: | NM_003855:                               |
| 29949  | IL19    | interleukin 19                                                                   | 1.64   | TCCCATCTAATTTATTTGTA   | NM_013371: | NM_153758.NM_013371:                     |
| 29949  | IL19    | interleukin 19                                                                   | -0.22  | CTGCAGATCAATTAAGCCCTTA | NM_013371: | NM_153758.NM_013371:                     |
| 3552   | IL1A    | interleukin 1, alpha                                                             | -0.94  | CACGCTACTTAAAGACAATTA  | NM_000575: | NM_000575:                               |
| 3552   | IL1A    | interleukin 1, alpha                                                             | -2.24  | CTGAGGTGATTTATGCTTAA   | NM_000575: | NM_000575:                               |
| 3553   | IL1B    | interleukin 1, beta                                                              | 0.53   | CAAGATAGAATAACATAACAA  | NM_000576: | NM_000576:                               |
| 3553   | IL1B    | interleukin 1, beta                                                              | -0.93  | CAGCCAATCTTCACTTGCTAA  | NM_000576: | NM_000576:                               |
| 84639  | IL1F10  | interleukin 1 family, member 10 (theta)                                          | -0.57  | AAGGCTCTATACACAAGAGAT  | NM_032556: | NM_032556.NM_173161:                     |
| 84639  | IL1F10  | interleukin 1 family, member 10 (theta)                                          | 0.04   | GCAAGATACTACATATAATTA  | NM_032556: | NM_032556.NM_173161:                     |
| 26525  | IL1F5   | interleukin 1 family, member 5 (delta)                                           | -0.77  | CTGGATGAAGGTAGACCTAAA  | NM_012275: | NM_173170.NM_012275:                     |
| 26525  | IL1F5   | interleukin 1 family, member 5 (delta)                                           | -0.08  | TGGCTCGAGCTCAGAAGATA   | NM_012275: | NM_173170.NM_012275:                     |
| 27179  | IL1F6   | interleukin 1 family, member 6 (epsilon)                                         | 0.36   | AAAGGATATAATGGATTTGTA  | NM_014440: | NM_014440:                               |
| 27179  | IL1F6   | interleukin 1 family, member 6 (epsilon)                                         | 0.38   | CTGGCCCTGAATGGACTCAAT  | NM_014440: | NM_014440:                               |

|        |                                 |                                                                  |       |                        |            |                                                    |
|--------|---------------------------------|------------------------------------------------------------------|-------|------------------------|------------|----------------------------------------------------|
| 27178  | IL1F7                           | interleukin 1 family, member 7 (zeta)                            | 0.23  | AACACCAAACTGCTCACTAA   | NM_014439: | NM_014439:NM_173202:NM_173203:NM_173204:NM_173205: |
| 27178  | IL1F7                           | interleukin 1 family, member 7 (zeta)                            | 1.52  | CTAATTGAACAAATTTGTATA  | NM_014439: | NM_014439:NM_173202:NM_173203:NM_173204:NM_173205: |
| 27177  | IL1F8                           | interleukin 1 family, member 8 (eta)                             | -0.29 | AACGCTCTGTTTATGATGTAT  | NM_014438: | NM_014438:                                         |
| 27177  | IL1F8                           | interleukin 1 family, member 8 (eta)                             | -0.01 | TTGGAATTCACACATGCATAA  | NM_014438: | NM_014438:                                         |
| 56300  | IL1F9                           | interleukin 1 family, member 9                                   | -0.17 | CACGATGGCATTGACTAGCACA | NM_019618: | NM_019618:                                         |
| 56300  | IL1F9                           | interleukin 1 family, member 9                                   | -0.90 | CAGGAGAGCTGGGTGGTATAA  | NM_019618: | NM_019618:                                         |
| 3554   | IL1R1                           | interleukin 1 receptor, type I                                   | 0.21  | CAGGCGCTAGCTTTCATTGGA  | NM_000877: | NM_000877:                                         |
| 3554   | IL1R1                           | interleukin 1 receptor, type I                                   | 1.14  | ATGCAGCATATATCCAGTTAA  | NM_000877: | NM_000877:                                         |
| 7850   | IL1R2                           | interleukin 1 receptor, type II                                  | -1.26 | CACGCCAGGAATATTCAGAAA  | NM_004633: | NM_173343:NM_004633:                               |
| 7850   | IL1R2                           | interleukin 1 receptor, type II                                  | -0.01 | AAGACTGCAATCCCGGTAA    | NM_004633: | NM_173343:NM_004633:                               |
| 3556   | IL1RAP                          | interleukin 1 receptor accessory protein                         | 0.28  | CGGGCATTAAATGATTTCTA   | NM_002182: | NM_002182:                                         |
| 3556   | IL1RAP                          | interleukin 1 receptor accessory protein                         | 1.39  | CCAGTCTCATTCCGAGTTA    | NM_002182: | NM_002182:                                         |
| 11141  | IL1RAPL1                        | interleukin 1 receptor accessory protein-like 1                  | -0.69 | ATGCAACAAGTTGAACCTCAA  | NM_014271: | NM_014271:                                         |
| 11141  | IL1RAPL1                        | interleukin 1 receptor accessory protein-like 1                  | -2.35 | ACGCTTGTGATGACCAGCAA   | NM_014271: | NM_014271:                                         |
| 26280  | IL1RAPL2                        | interleukin 1 receptor accessory protein-like 2                  | 0.51  | ACCAAGCATAAAGTACACCTA  | NM_017416: | NM_017416:                                         |
| 26280  | IL1RAPL2                        | interleukin 1 receptor accessory protein-like 2                  | 0.78  | CAGAAGCTCTGCTGAACCTA   | NM_017416: | NM_017416:                                         |
| 9173   | IL1RL1                          | interleukin 1 receptor-like 1                                    | 0.27  | ACCGTAAGACTAAGTAGGAAA  | NM_003856: | NM_003856:NM_016232:NM_173459:                     |
| 9173   | IL1RL1                          | interleukin 1 receptor-like 1                                    | -1.58 | CAGACTTTGGTGAAACCAAGAA | NM_003856: | NM_003856:NM_016232:NM_173459:                     |
| 8808   | IL1RL2                          | interleukin 1 receptor-like 2                                    | 0.99  | AAGGACTGTAAACGAGATTTAA | NM_003854: | NM_003854:                                         |
| 8808   | IL1RL2                          | interleukin 1 receptor-like 2                                    | 0.69  | TGGGTCCAATAAAGTGGTATA  | NM_003854: | NM_003854:                                         |
| 3557   | IL1RN                           | interleukin 1 receptor antagonist                                | -0.05 | CCAAATGCAATTTAGAAGAA   | NM_000577: | NM_000577:NM_173843:NM_173842:NM_173841:           |
| 3557   | IL1RN                           | interleukin 1 receptor antagonist                                | -1.83 | CAGCGAATGAATGCTGTATAT  | NM_000577: | NM_000577:NM_173843:NM_173842:NM_173841:           |
| 3558   | IL2                             | interleukin 2                                                    | 0.62  | CACCAGGATGCTCACATTTAA  | NM_000586: | NM_000586:                                         |
| 3558   | IL2                             | interleukin 2                                                    | -0.19 | CTGGAGGAAGTCTAAATTTA   | NM_000586: | NM_000586:                                         |
| 50604  | IL20                            | interleukin 20                                                   | 0.19  | CACGGCCAGCATGATTTCTA   | NM_018724: | NM_018724:                                         |
| 50604  | IL20                            | interleukin 20                                                   | 0.38  | CAGATTATATTATAACCTGA   | NM_018724: | NM_018724:                                         |
| 53832  | IL20RA                          | interleukin 20 receptor, alpha                                   | -1.47 | CTCAATCTTTATAGAAACGAT  | NM_014432: | NM_014432:                                         |
| 53832  | IL20RA                          | interleukin 20 receptor, alpha                                   | 0.14  | ATGGTTTAAITTAGGAGTAA   | NM_014432: | NM_014432:                                         |
| 59067  | IL21                            | interleukin 21                                                   | 0.57  | GAGCCCTATTAATAATATATA  | NM_021803: | NM_021803:                                         |
| 59067  | IL21                            | interleukin 21                                                   | 1.79  | AAGGATAATCAATGTATCAAT  | NM_021803: | NM_021803:                                         |
| 50615  | IL21R                           | interleukin 21 receptor                                          | -0.45 | ACCTGTTGAAATGGAAATTA   | NM_021798: | NM_181078:NM_181079:NM_021798:                     |
| 50615  | IL21R                           | interleukin 21 receptor                                          | -0.36 | CCAGAGCAGACCCTCAATAAA  | NM_021798: | NM_181078:NM_181079:NM_021798:                     |
| 50616  | IL22                            | interleukin 22                                                   | 0.87  | AACATGTTTATTGACCTCAA   | NM_020525: | NM_020525:                                         |
| 50616  | IL22                            | interleukin 22                                                   | 0.53  | AAGGTAGACTTCTAAGCATA   | NM_020525: | NM_020525:                                         |
| 58985  | IL22RA1                         | interleukin 22 receptor, alpha 1                                 | -0.31 | CGGGTACAATAACCACTGTA   | NM_021258: | NM_021258:                                         |
| 58985  | IL22RA1                         | interleukin 22 receptor, alpha 1                                 | 0.30  | CGGGAGCAAGCAGCATGATA   | NM_021258: | NM_021258:                                         |
| 116379 | IL22RA2                         | interleukin 22 receptor, alpha 2                                 | -0.23 | CTGTGATGGCTGGAATATA    | NM_052962: | NM_052962:NM_181309:NM_181310:                     |
| 116379 | IL22RA2                         | interleukin 22 receptor, alpha 2                                 | -1.34 | CACAGAGCGGTTGAAATTGAA  | NM_052962: | NM_052962:NM_181309:NM_181310:                     |
| 51561  | IL23A                           | interleukin 23, alpha subunit p19                                | -1.11 | CAGATTGAGAAGAAGGCAA    | NM_016584: | NM_016584:                                         |
| 51561  | IL23A                           | interleukin 23, alpha subunit p19                                | 0.80  | CCAGATTGAGAAGAAGGCAA   | NM_016584: | NM_016584:                                         |
| 149233 | IL23R (interleukin 23 receptor) | interleukin 23 receptor                                          | 0.50  | ATGAGGAGTGGCCATCTATTA  | NM_144701: | NM_144701:                                         |
| 149233 | IL23R (interleukin 23 receptor) | interleukin 23 receptor                                          | 0.17  | TCACATGATTACAGAGATAAA  | NM_144701: | NM_144701:                                         |
| 11009  | IL24                            | interleukin 24                                                   | -0.01 | CAGTGGATGGGTGCTTAGTAA  | NM_006850: | NM_181339:NM_006850:                               |
| 11009  | IL24                            | interleukin 24                                                   | -0.06 | CTGGCTGAACTTTGTGGTCGA  | NM_006850: | NM_181339:NM_006850:                               |
| 55801  | IL26                            | interleukin 26                                                   | -3.53 | CAGTGTGAACCTTAGTACTTAA | NM_018402: | NM_018402:                                         |
| 55801  | IL26                            | interleukin 26                                                   | -0.01 | CAAGTACATTTGTCAACTTA   | NM_018402: | NM_018402:                                         |
| 246778 | IL27                            | interleukin 27                                                   | -0.13 | CTGGACCAACATGGAGAGGAT  | NM_145659: | NM_145659:                                         |
| 246778 | IL27                            | interleukin 27                                                   | 0.92  | CAGCCTGCATCTGCCAGGAA   | NM_145659: | NM_145659:                                         |
| 9466   | IL27RA                          | interleukin 27 receptor, alpha                                   | -0.93 | TTCCGCTGTAACAGAACTGAA  | NM_004843: | NM_004843:                                         |
| 9466   | IL27RA                          | interleukin 27 receptor, alpha                                   | -0.64 | TCCGCTCATCTACAGATA     | NM_004843: | NM_004843:                                         |
| 282616 | IL28A                           | interleukin 28A (interferon, lambda 2)                           | -2.61 | TAGCCACTTGCTCTAATTTAT  | NM_172138: | NM_172138:                                         |
| 282616 | IL28A                           | interleukin 28A (interferon, lambda 2)                           | 0.04  | CAGGAATGAACTAGACATGA   | NM_172138: | NM_172138:                                         |
| 163702 | IL28RA                          | interleukin 28 receptor, alpha (interferon, lambda receptor)     | -0.50 | CCCAGTTGGATGGCAGCTTAA  | NM_170743: | NM_170743:NM_173064:NM_173065:                     |
| 163702 | IL28RA                          | interleukin 28 receptor, alpha (interferon, lambda receptor)     | -1.41 | CACCTCGTTTCTATTTCTAAA  | NM_170743: | NM_170743:NM_173064:NM_173065:                     |
| 282618 | IL29                            | interleukin 29 (interferon, lambda 1)                            | -0.26 | CGCCTTGGAAAGAGTCACTCAA | NM_172140: | NM_172140:                                         |
| 282618 | IL29                            | interleukin 29 (interferon, lambda 1)                            | -0.04 | CCCTACTCCTTCTTAATTTA   | NM_172140: | NM_172140:                                         |
| 3559   | IL2RA                           | interleukin 2 receptor, alpha                                    | 0.58  | CCACCCTATATGTAGTATAA   | NM_000417: | NM_000417:                                         |
| 3559   | IL2RA                           | interleukin 2 receptor, alpha                                    | 0.49  | CTCCACCCTATATGTAGTATA  | NM_000417: | NM_000417:                                         |
| 3560   | IL2RB                           | interleukin 2 receptor, beta                                     | -2.24 | CCCGGATGCTTGGAGATAGA   | NM_000878: | NM_000878:                                         |
| 3560   | IL2RB                           | interleukin 2 receptor, beta                                     | -1.32 | ATGGCTGAAGAAGGCTCGAA   | NM_000878: | NM_000878:                                         |
| 3561   | IL2RG                           | interleukin 2 receptor, gamma (severe combined immunodeficiency) | 0.05  | CTAGAGGATCTTGTACTGAA   | NM_000206: | NM_000206:                                         |
| 3561   | IL2RG                           | interleukin 2 receptor, gamma (severe combined immunodeficiency) | 0.00  | CTGAACAATCAGTGGATTATA  | NM_000206: | NM_000206:                                         |
| 3562   | IL3                             | interleukin 3 (colony-stimulating factor, multiple)              | 0.61  | AGCAATTGAGAGCATTCTTAA  | NM_000588: | NM_000588:                                         |
| 3562   | IL3                             | interleukin 3 (colony-stimulating factor, multiple)              | -0.03 | CTGCTCAACATGATCGATGA   | NM_000588: | NM_000588:                                         |
| 133396 | IL31RA                          | interleukin 31 receptor A                                        | 1.04  | CGGGACCAGCATAAATTTCAA  | NM_139017: | NM_139017:                                         |
| 133396 | IL31RA                          | interleukin 31 receptor A                                        | 0.43  | AAGAATAACGATCCAGATAA   | NM_139017: | NM_139017:                                         |
| 3565   | IL4                             | interleukin 4                                                    | -0.59 | CACCGAGTGAACCGTAAACGA  | NM_000589: | NM_000589:                                         |
| 3565   | IL4                             | interleukin 4                                                    | 0.00  | CACATTGCTCACTGCAATCGA  | NM_000589: | NM_172348:NM_000589:                               |
| 259307 | IL4I1                           | interleukin 4 induced 1                                          | 0.28  | ACACGAGGACCTCGCATTTAA  | NM_152899: | NM_152899:NM_172374:                               |
| 259307 | IL4I1                           | interleukin 4 induced 1                                          | 0.61  | CTGGGTGGAGACGGCGGTCAA  | NM_152899: | NM_152899:NM_172374:                               |
| 3566   | IL4R                            | interleukin 4 receptor                                           | 0.18  | CACATACATGAGGCTCTCTTA  | NM_000418: | NM_000418:                                         |
| 3566   | IL4R                            | interleukin 4 receptor                                           | 0.05  | CCGCTCTGCTGCTATAATAAT  | NM_000418: | NM_000418:                                         |
| 3567   | IL5                             | interleukin 5 (colony-stimulating factor, eosinophil)            | 0.08  | CGGAGAGTAAACCAATCTCTA  | NM_000879: | NM_000879:                                         |
| 3567   | IL5                             | interleukin 5 (colony-stimulating factor, eosinophil)            | -0.95 | AAGAATAACATTCAGCGCCAA  | NM_000879: | NM_000879:                                         |
| 3568   | IL5RA                           | interleukin 5 receptor, alpha                                    | -0.36 | CACCAGTCTGTATCTCTTAA   | NM_000564: | NM_000564:NM_175726:                               |
| 3568   | IL5RA                           | interleukin 5 receptor, alpha                                    | 0.73  | CACGCCATTGATCAAATAAT   | NM_000564: | NM_175728:NM_000564:NM_175724:NM_175725:           |
| 3569   | IL6                             | interleukin 6 (interferon, beta 2)                               | 1.54  | TAAAGAAATATTATATTTGA   | NM_000600: | NM_000600:                                         |
| 3569   | IL6                             | interleukin 6 (interferon, beta 2)                               | 1.37  | CAAAATAAATGGCTAACTTATA | NM_000600: | NM_000600:                                         |
| 3570   | IL6R                            | interleukin 6 receptor                                           | 1.70  | ACCAGTTAGCTCTCAAGTTA   | NM_000565: | NM_181359:NM_000565:                               |
| 3570   | IL6R                            | interleukin 6 receptor                                           | 1.18  | TAGTTGTAACACCATTGATTA  | NM_000565: | NM_181359:NM_000565:                               |
| 3572   | IL6ST                           | interleukin 6 signal transducer (gp130, oncostatin M receptor)   | -0.73 | CGGCCAGAAAGATCTCAATTA  | NM_002184: | NM_175767:NM_002184:                               |
| 3572   | IL6ST                           | interleukin 6 signal transducer (gp130, oncostatin M receptor)   | 1.36  | CACATTTGATCATGGTACGAAT | NM_002184: | NM_175767:NM_002184:                               |
| 3574   | IL7                             | interleukin 7                                                    | -1.34 | TAAGAGAGTCATAAACCTTAA  | NM_000880: | NM_000880:                                         |
| 3574   | IL7                             | interleukin 7                                                    | 1.79  | CTGAATGCTCCAGTCAACAAA  | NM_000880: | NM_000880:                                         |
| 3575   | IL7R                            | interleukin 7 receptor                                           | -0.91 | CGGCAGCAATGTATGAGATTA  | NM_002185: | NM_002185:                                         |
| 3575   | IL7R                            | interleukin 7 receptor                                           | -0.87 | CTGAGTGTGCTATCGGGAA    | NM_002185: | NM_002185:                                         |
| 3576   | IL8                             | interleukin 8                                                    | -0.99 | AACAATGGGTACCAGTTAA    | NM_000584: | NM_000584:                                         |
| 3576   | IL8                             | interleukin 8                                                    | -1.03 | CTGCGCAACACAGAAATTAT   | NM_000584: | NM_000584:                                         |
| 3577   | IL8RA                           | interleukin 8 receptor, alpha                                    | 0.43  | CCCCTTGAAGCTCACATCTTT  | NM_000634: | NM_000634:                                         |
| 3577   | IL8RA                           | interleukin 8 receptor, alpha                                    | 1.41  | TCCGCCAGGCTTACCATCCAA  | NM_000634: | NM_000634:                                         |
| 3579   | IL8RB                           | interleukin 8 receptor, beta                                     | 0.15  | AGGATTTAAGTTTACCCTCAA  | NM_001557: | NM_001557:                                         |
| 3579   | IL8RB                           | interleukin 8 receptor, beta                                     | -1.96 | CCCAGTCAAGATTTAAGTTTA  | NM_001557: | NM_001557:                                         |
| 3578   | IL9                             | interleukin 9                                                    | 0.48  | ATCAGTTGAAGTAAAGAA     | NM_000590: | NM_000590:                                         |
| 3578   | IL9                             | interleukin 9                                                    | 0.92  | TACCACCATGCAAAACAGATA  | NM_000590: | NM_000590:                                         |

|        |               |                                                                   |       |                         |            |                                          |
|--------|---------------|-------------------------------------------------------------------|-------|-------------------------|------------|------------------------------------------|
| 3581   | IL9R          | interleukin 9 receptor                                            | -5.27 | CAGCATGAGCTGGCCTTCAA    | NM_002186: | NM_002186.NM_176786:                     |
| 3581   | IL9R          | interleukin 9 receptor                                            | -0.37 | AAGGACAAGGGCCAAAGTCTA   | NM_002186: | NM_002186.NM_176786:                     |
| 3581   | IL9R          | interleukin 9 receptor                                            | -2.23 | CAGGGTGAAGAGAAATCTTCTA  | XM_375284: | NM_002186.NM_176786:XM_375284:           |
| 3581   | IL9R          | interleukin 9 receptor                                            | 0.36  | AGGCACCTTTCTAGAGATTAA   | XM_375284: | NM_002186.NM_176786:XM_375284:           |
| 286676 | ILDR1         | immunoglobulin-like domain containing receptor 1                  | 0.52  | TGGGAATGACACAGTATATAA   | NM_175924: | NM_175924:                               |
| 286676 | ILDR1         | immunoglobulin-like domain containing receptor 1                  | -0.34 | AAGGAATCTATGGAGTATTA    | NM_175924: | NM_175924:                               |
| 3608   | ILF2          | interleukin enhancer binding factor 2, 45kDa                      | -6.85 | CAGGCCCTTTGTACCACATAT   | NM_004515: | NM_004515:                               |
| 3608   | ILF2          | interleukin enhancer binding factor 2, 45kDa                      | -0.04 | CTCCATAGAAAGTGTCTATCCCA | NM_004515: | NM_004515:                               |
| 3609   | ILF3          | interleukin enhancer binding factor 3, 90kDa                      | -0.85 | AACGATTTCCACCACATCTGAA  | NM_153464: | NM_004516.NM_153464:                     |
| 3609   | ILF3          | interleukin enhancer binding factor 3, 90kDa                      | -0.01 | CTGGTTTAGCTAGAGAGTGAA   | NM_153464: | NM_004516.NM_153464:                     |
| 3611   | ILK           | integrin-linked kinase                                            | -0.11 | AAGGAAGAGCAGGACTTCAA    | NM_004517: | NM_001014795.NM_001014794.NM_004517:     |
| 3611   | ILK           | integrin-linked kinase                                            | 0.48  | CAGCCCAGTCCCAGGATATA    | NM_004517: | NM_004517:                               |
| 80895  | ILKAP         | integrin-linked kinase-associated serine/threonine phosphatase 2C | -0.39 | ATGGAGAATTCGAGCCTCAA    | NM_176799: | NM_030768.NM_176799:                     |
| 80895  | ILKAP         | integrin-linked kinase-associated serine/threonine phosphatase 2C | -0.89 | CCCGTAGCAGTGGCGATTCA    | NM_176799: | NM_030768.NM_176799:                     |
| 83943  | IMP2L         | IMP2 inner mitochondrial membrane peptidase-like (S. cerevisiae)  | 1.78  | CCAGTTAGGAAGAACAGTAAA   | NM_032549: | NM_032549:                               |
| 83943  | IMP2L         | IMP2 inner mitochondrial membrane peptidase-like (S. cerevisiae)  | 1.11  | CAAGAAGGAACACATATATA    | NM_032549: | NM_032549:                               |
| 3612   | IMPA1         | inositol(myo)-1(or 4)-monophosphatase 1                           | 1.08  | ACGAAGAGTAATGCTGCAAA    | NM_005536: | NM_005536:                               |
| 3612   | IMPA1         | inositol(myo)-1(or 4)-monophosphatase 1                           | -0.33 | CGGAAGAGCAGGAGTCCGGTA   | NM_005536: | NM_005536:                               |
| 3614   | IMPDH1        | IMP (inosine monophosphate) dehydrogenase 1                       | 0.34  | ATGGCCTGCACCTTACGAAA    | NM_183243: | NM_183243.NM_000883:                     |
| 3614   | IMPDH1        | IMP (inosine monophosphate) dehydrogenase 1                       | 0.13  | CAGCAGCAGCCAGAAAGGATA   | NM_183243: | NM_183243.NM_000883:                     |
| 3615   | IMPDH2        | IMP (inosine monophosphate) dehydrogenase 2                       | -0.24 | CAGAACAGATATTTCAAGTAA   | NM_000884: | NM_000884:                               |
| 3615   | IMPDH2        | IMP (inosine monophosphate) dehydrogenase 2                       | -0.44 | TGGGATCCGGCTAAAGAAATA   | NM_000884: | NM_000884:                               |
| 3617   | IMPG1         | interphosphoreceptor matrix proteoglycan 1                        | -0.52 | TCGGATCTTTGGATCGCAT     | NM_001563: | NM_001563:                               |
| 3617   | IMPG1         | interphosphoreceptor matrix proteoglycan 1                        | 0.11  | CCGTAGAATTAAGAAGATTAA   | NM_001563: | NM_001563:                               |
| 50939  | IMPG2         | interphosphoreceptor matrix proteoglycan 2                        | -1.09 | AAGGAAATTCGTGACTTGAA    | NM_016247: | NM_016247:                               |
| 50939  | IMPG2         | interphosphoreceptor matrix proteoglycan 2                        | -0.69 | TCAGGCATTCATCAATAATAA   | NM_016247: | NM_016247:                               |
| 10207  | INADL         | InaD-like (Drosophila)                                            | -1.44 | CAGCTTCATCATACCATTCAA   | NM_005799: | NM_176877.NM_176878.NM_170605.NM_005799: |
| 10207  | INADL         | InaD-like (Drosophila)                                            | -0.87 | CTGCACATTTGAACCTGAA     | NM_005799: | NM_176877.NM_176878.NM_170605.NM_005799: |
| 3619   | INCENP        | inner centromere protein antigens 135/155kDa                      | -1.19 | AGCGTTTGGGAGGTAGATTAA   | NM_020238: | NM_020238:                               |
| 3619   | INCENP        | inner centromere protein antigens 135/155kDa                      | -3.83 | CGGCATCATCTGTCCACAGTTA  | NM_020238: | NM_020238:                               |
| 3620   | INDO          | indoleamine-pyrole 2,3 dioxygenase                                | 0.09  | CGTAAGGTCTTGGCCAGAAA    | NM_002164: | NM_002164:                               |
| 3620   | INDO          | indoleamine-pyrole 2,3 dioxygenase                                | 1.33  | AGGAAGGTTAATGTAAACCCAA  | NM_002164: | NM_002164:                               |
| 3621   | ING1          | inhibitor of growth family, member 1                              | 0.82  | CAGTTTGTCTCCTAGTAGTA    | NM_005537: | NM_198219.NM_005537.NM_198218.NM_198217: |
| 3621   | ING1          | inhibitor of growth family, member 1                              | 1.13  | TAGTTTATTCAACACTTAA     | NM_005537: | NM_198219.NM_005537.NM_198218.NM_198217: |
| 3622   | ING2          | inhibitor of growth family, member 2                              | 1.98  | AACAATATCAAGAAACGTTA    | NM_001564: | NM_001564:                               |
| 3622   | ING2          | inhibitor of growth family, member 2                              | 0.80  | AGAGCACTAATTAATAGTCAA   | NM_001564: | NM_001564:                               |
| 54556  | ING3          | inhibitor of growth family, member 3                              | -0.59 | CTAGAGTACCTGGGTACATAA   | NM_019071: | NM_198266.NM_019071:                     |
| 54556  | ING3          | inhibitor of growth family, member 3                              | -0.12 | AACCAGAGTTCGCCATATAGAA  | NM_019071: | NM_198266.NM_019071:                     |
| 51147  | ING4          | inhibitor of growth family, member 4                              | 0.30  | TACGTACTGTACTACTATAAA   | NM_016162: | NM_198287.NM_016162:                     |
| 51147  | ING4          | inhibitor of growth family, member 4                              | 0.17  | TACATACGTACTGCTACTATA   | NM_016162: | NM_198287.NM_016162:                     |
| 84289  | ING5          | inhibitor of growth family, member 5                              | -0.01 | ACCGTGAGGGATGTTAATTAT   | NM_032329: | NM_032329:                               |
| 84289  | ING5          | inhibitor of growth family, member 5                              | 1.31  | AACCGTGAGGGATGTTAATTAT  | NM_032329: | NM_032329:                               |
| 3623   | INH A         | inhibin, inhibin, alpha                                           | 0.02  | CAGCACTGTGCTGTATCTAA    | NM_002191: | NM_002191:                               |
| 3623   | INH A         | inhibin, inhibin, alpha                                           | -0.89 | AAGGCAGAGTTGGGAAATAGA   | NM_002191: | NM_002191:                               |
| 3624   | INH B A       | inhibin, beta A (activin A, activin AB alpha polypeptide)         | -2.86 | CTGCAGTGTGTGGACTAGAA    | NM_002192: | NM_002192:                               |
| 3625   | INH B B       | inhibin, beta B (activin AB beta polypeptide)                     | 0.82  | CACGTGAACATGCAATTTAA    | NM_002193: | NM_002193:                               |
| 3625   | INH B B       | inhibin, beta B (activin AB beta polypeptide)                     | -1.23 | CCACGTGAACATGCAATTTAA   | NM_002193: | NM_002193:                               |
| 3626   | INH C         | inhibin, beta C                                                   | 0.09  | CAGCCCAAGTTGCGATGGGAA   | NM_005538: | NM_005538:                               |
| 3626   | INH C         | inhibin, beta C                                                   | 0.01  | ACACCCCTTAGCTCACCTTAA   | NM_005538: | NM_005538:                               |
| 83729  | INH B E       | inhibin, beta E                                                   | -1.36 | TAGGGTGTGGTCCAGAGCAA    | NM_031479: | NM_031479:                               |
| 83729  | INH B E       | inhibin, beta E                                                   | -2.63 | AGGGCTGTTGAGGTACCTTAA   | NM_031479: | NM_031479:                               |
| 3628   | INPP1         | inositol polyphosphate-1-phosphatase                              | 1.05  | CGTAATTAGTACAAGTGAAA    | NM_002194: | NM_002194:                               |
| 3628   | INPP1         | inositol polyphosphate-1-phosphatase                              | 1.68  | TAGATTCACCTTATCAGTATA   | NM_002194: | NM_002194:                               |
| 8821   | INPP4B        | inositol polyphosphate-4-phosphatase, type II, 105kDa             | -0.68 | AACGATTTGCGGAAACGTTAA   | NM_003866: | NM_003866:                               |
| 8821   | INPP4B        | inositol polyphosphate-4-phosphatase, type II, 105kDa             | -0.16 | CCCGAAAGGTGTGAGCGGAAA   | NM_003866: | NM_003866:                               |
| 3632   | INPP5A        | inositol polyphosphate-5-phosphatase, 40kDa                       | 1.88  | CGGAAGGTTATGCTCCAGTTA   | NM_005539: | NM_005539:                               |
| 3632   | INPP5A        | inositol polyphosphate-5-phosphatase, 40kDa                       | -1.63 | TCGAGTGTGCGATGAAAGAA    | NM_005539: | NM_005539:                               |
| 3633   | INPP5B        | inositol polyphosphate-5-phosphatase, 75kDa                       | -0.27 | TTGCGGGAACATACAAATGTA   | NM_005540: | NM_005540:                               |
| 3633   | INPP5B        | inositol polyphosphate-5-phosphatase, 75kDa                       | -0.89 | AAGAAGAGGATTCACCTATA    | NM_005540: | NM_005540:                               |
| 3635   | INPP5D        | inositol polyphosphate-5-phosphatase, 145kDa                      | -2.43 | CAGGTGCTATGCCACATGAAA   | NM_005541: | NM_005541.NM_001017915:                  |
| 3635   | INPP5D        | inositol polyphosphate-5-phosphatase, 145kDa                      | -8.37 | TCCCATCAACATGTTGTTCCAA  | NM_005541: | NM_005541.NM_001017915:                  |
| 56623  | INPP5E        | inositol polyphosphate-5-phosphatase, 72 kDa                      | -3.02 | AGCATCTGCTCTAGAGTCAA    | NM_019892: | NM_019892:                               |
| 56623  | INPP5E        | inositol polyphosphate-5-phosphatase, 72 kDa                      | -0.50 | ACGGATTTGGAAGGAGATTCA   | NM_019892: | NM_019892:                               |
| 22876  | INPP5F        | inositol polyphosphate-5-phosphatase F                            | -0.31 | AAGACCTTTACGCATATATAA   | NM_198331: | NM_014937.NM_198331:                     |
| 22876  | INPP5F        | inositol polyphosphate-5-phosphatase F                            | -0.00 | CAGATCTCCATGTTGGCTTAA   | NM_198331: | NM_014937.NM_198331:                     |
| 3630   | INS (insulin) | insulin                                                           | -1.16 | AAGCGTGGCATTGGGAACAA    | NM_000207: | NM_000207:                               |
| 3630   | INS (insulin) | insulin                                                           | -0.01 | AGGCTTCTTACACACCCAA     | NM_000207: | NM_000207:                               |
| 3638   | INSIG1        | insulin induced gene 1                                            | -0.85 | AAGCAGCGAGTGAATCTTTAA   | NM_198337: | NM_005542.NM_198336.NM_198337:           |
| 3638   | INSIG1        | insulin induced gene 1                                            | 0.69  | ATGTTGCTTAAACAAACATGAA  | NM_198337: | NM_005542.NM_198336.NM_198337:           |
| 3640   | INSL3         | insulin-like 3 (Leydig cell)                                      | 1.39  | TTGCTGCTCTTAGTAATAA     | NM_005543: | NM_005543:                               |
| 3640   | INSL3         | insulin-like 3 (Leydig cell)                                      | -0.09 | CTCAGTGGCTGACCCAAACAA   | NM_005543: | NM_005543:                               |
| 3641   | INSL4         | insulin-like 4 (placenta)                                         | -3.10 | ATCCATTCTGTTGGAAGTAA    | NM_002195: | NM_002195:                               |
| 3641   | INSL4         | insulin-like 4 (placenta)                                         | 0.02  | CTGAGCCAACCTCTTAGAGAA   | NM_002195: | NM_002195:                               |
| 3643   | INSR          | insulin receptor                                                  | 0.63  | ACCGCTTTACGCTTCTTCAA    | NM_000208: | NM_000208:                               |
| 3643   | INSR          | insulin receptor                                                  | -0.92 | TAGGAAGAGCTTTGAGGATTA   | NM_000208: | NM_000208:                               |
| 3645   | INSRR         | insulin receptor-related receptor                                 | -3.00 | CAGCTCGGATTTGAGATCCA    | NM_014215: | NM_014215:                               |
| 3645   | INSRR         | insulin receptor-related receptor                                 | 0.67  | TTGGAAGGTGACGTCCATCAA   | NM_014215: | NM_014215:                               |
| 79711  | IPO4          | importin 4                                                        | 0.37  | TACAGCCTATTTCAGCCCTTA   | NM_024658: | NM_024658:                               |
| 79711  | IPO4          | importin 4                                                        | -0.09 | CCCAAGCATTTCCGTGTACAA   | NM_024658: | NM_024658:                               |
| 10527  | IPO7          | importin 7                                                        | -0.59 | CACCTACTACTCAATACCTTA   | NM_006391: | NM_006391:                               |
| 10527  | IPO7          | importin 7                                                        | 0.41  | CTGACTCAGGCTTAAATGAA    | NM_006391: | NM_006391:                               |
| 8826   | IQGAP1        | IQ motif containing GTPase activating protein 1                   | -2.33 | CAGGCGCTAGCTCATGAAGAA   | NM_003870: | NM_003870:                               |
| 8826   | IQGAP1        | IQ motif containing GTPase activating protein 1                   | -0.61 | CTGGGAGATAATGCCCACTTA   | NM_003870: | NM_003870:                               |
| 10788  | IQGAP2 (IQ n) | IQ motif containing GTPase activating protein 2                   | 0.21  | CGCACAAAGTCCGTAATCTTA   | NM_006633: | NM_006633:                               |
| 10788  | IQGAP2 (IQ n) | IQ motif containing GTPase activating protein 2                   | -1.84 | CGGCAGAACATTGTTATGAA    | NM_006633: | NM_006633:                               |
| 128239 | IQGAP3        | IQ motif containing GTPase activating protein 3                   | -2.32 | CTCCGTGGTCCGTTGAAGAA    | NM_178229: | NM_178229:                               |
| 128239 | IQGAP3        | IQ motif containing GTPase activating protein 3                   | 1.55  | GAGCACTAAGACCACCTTCTA   | NM_178229: | NM_178229:                               |
| 3654   | IRAK1         | interleukin-1 receptor-associated kinase 1                        | 0.61  | CGGGCAATTCAGTTTCTACA    | NM_001569: | NM_001569.NM_001025242.NM_001025243:     |
| 3654   | IRAK1         | interleukin-1 receptor-associated kinase 1                        | 0.42  | TCCCATCGCCATGCAGATCTA   | NM_001569: | NM_001569.NM_001025242:                  |
| 3656   | IRAK2         | interleukin-1 receptor-associated kinase 2                        | 0.26  | CAGCAACGCTCAAGAGCTTAA   | NM_001570: | NM_001570:                               |
| 3656   | IRAK2         | interleukin-1 receptor-associated kinase 2                        | 0.20  | CCAGATCATCCTGAACTGGAA   | NM_001570: | NM_001570:                               |
| 11213  | IRAK3         | interleukin-1 receptor-associated kinase 3                        | 1.01  | CACATTCGAATCGTATATTTA   | NM_007199: | NM_007199:                               |
| 11213  | IRAK3         | interleukin-1 receptor-associated kinase 3                        | 0.15  | CTGGATGTTGCTCATATTTGAA  | NM_007199: | NM_007199:                               |
| 51135  | IRAK4         | interleukin-1 receptor-associated kinase 4                        | 1.99  | ATCCTATTAGTCATATTTTAA   | NM_016123: | NM_016123:                               |
| 51135  | IRAK4         | interleukin-1 receptor-associated kinase 4                        | 0.26  | TTGAGGACAGTGGTATTAA     | NM_016123: | NM_016123:                               |

|        |                                                 |                                                                            |       |                        |            |                                                                              |
|--------|-------------------------------------------------|----------------------------------------------------------------------------|-------|------------------------|------------|------------------------------------------------------------------------------|
| 3658   | IREB2                                           | iron-responsive element binding protein 2                                  | -1.25 | CAGGAAGTATCGTAGGAATA   | NM_004136: | NM_004136:                                                                   |
| 3658   | IREB2                                           | iron-responsive element binding protein 2                                  | -2.22 | CAGTGGGATGGTTACACATTA  | NM_004136: | NM_004136:                                                                   |
| 3659   | IRF1                                            | interferon regulatory factor 1                                             | -2.99 | CAAGCATGGCTGGGACATCAA  | NM_002198: | NM_002198:                                                                   |
| 3659   | IRF1                                            | interferon regulatory factor 1                                             | 0.08  | CAGCCGAGATGCTAAGAGCAA  | NM_002198: | NM_002198:                                                                   |
| 3660   | IRF2                                            | interferon regulatory factor 2                                             | -0.03 | CACCTTATCTTAAAGCACTTA  | NM_002199: | NM_002199:                                                                   |
| 3660   | IRF2                                            | interferon regulatory factor 2                                             | -1.69 | ACGGTGAACATCATAGTTGTA  | NM_002199: | NM_002199:                                                                   |
| 26145  | IRF2BP1                                         | interferon regulatory factor 2 binding protein 1                           | 0.77  | ACCGCTGCCGCGGATAAAATTA | NM_015649: | NM_015649:                                                                   |
| 26145  | IRF2BP1                                         | interferon regulatory factor 2 binding protein 1                           | -0.02 | TTCAAGTACCTCGAATATGAA  | NM_015649: | NM_015649:                                                                   |
| 359948 | IRF2BP2                                         | interferon regulatory factor 2 binding protein 2                           | 1.09  | CTGCTTGAATTGTATATATAT  | NM_182972: | NM_182972:                                                                   |
| 359948 | IRF2BP2                                         | interferon regulatory factor 2 binding protein 2                           | 0.32  | CCCAATGATTACCCCTTAATTA | NM_182972: | NM_182972:                                                                   |
| 3661   | IRF3 (interferon interferon regulatory factor 3 |                                                                            | 0.76  | CAAGAGGCTCGTGATGGTCAA  | NM_001571: | NM_001571:                                                                   |
| 3661   | IRF3 (interferon interferon regulatory factor 3 |                                                                            | -4.12 | CCGCTCTGCCCTCAACCGCAA  | NM_001571: | NM_001571:                                                                   |
| 3662   | IRF4                                            | interferon regulatory factor 4                                             | 0.88  | CAGTGATGTATACATCTTATA  | NM_002460: | NM_002460:                                                                   |
| 3662   | IRF4                                            | interferon regulatory factor 4                                             | -0.08 | TAGCTAAACAGTGAAGATTTA  | NM_002460: | NM_002460:                                                                   |
| 3667   | IRS1                                            | insulin receptor substrate 1                                               | -0.05 | CCGGTGAACCTCAGTCCATA   | NM_005544: | NM_005544:                                                                   |
| 3667   | IRS1                                            | insulin receptor substrate 1                                               | -3.13 | CCGGTATCGTTCCGATGGAA   | NM_005544: | NM_005544:                                                                   |
| 8660   | IRS2 (insulin i                                 | insulin receptor substrate 2                                               | 0.94  | CAGTGATTGACGATATTTA    | NM_003749: | NM_003749:                                                                   |
| 8660   | IRS2 (insulin i                                 | insulin receptor substrate 2                                               | -0.02 | TCGCTATAGAATAATGCATTA  | NM_003749: | NM_003749:                                                                   |
| 8471   | IRS4                                            | insulin receptor substrate 4                                               | 0.12  | GAGGGTGACTACATTTGAAGTA | NM_003604: | NM_003604:                                                                   |
| 8471   | IRS4                                            | insulin receptor substrate 4                                               | 1.32  | GCGGCGGTGATCCACCTATA   | NM_003604: | NM_003604:                                                                   |
| 10379  | ISGF3G                                          | interferon-stimulated transcription factor 3, gamma 48kDa                  | -1.65 | CCGGAGTGTGCTGGGATGATA  | NM_006084: | NM_006084:                                                                   |
| 10379  | ISGF3G                                          | interferon-stimulated transcription factor 3, gamma 48kDa                  | 0.04  | CACGATTGACCTGCTCCTTTT  | NM_006084: | NM_006084:                                                                   |
| 57611  | ISLR2                                           | immunoglobulin superfamily containing leucine-rich repeat 2                | 0.92  | CGCGATTATCTGCGAAATCCA  | NM_020851: | NM_020851:                                                                   |
| 57611  | ISLR2                                           | immunoglobulin superfamily containing leucine-rich repeat 2                | 0.46  | CCCGGTGGCCCGCTAGCTTTA  | NM_020851: | NM_020851:                                                                   |
| 51477  | ISYNA1                                          | myo-inositol 1-phosphate synthase A1                                       | -0.59 | TACCTATGTTGAACAAGAAA   | NM_016368: | NM_016368:                                                                   |
| 51477  | ISYNA1                                          | myo-inositol 1-phosphate synthase A1                                       | -6.88 | CCGCTCTAAGGAGGTGCCAA   | NM_016368: | NM_016368:                                                                   |
| 51477  | ISYNA1                                          | myo-inositol 1-phosphate synthase A1                                       | 0.45  | TACCTATGTTGAACAAGAAA   | NM_016368: | NM_016368:                                                                   |
| 51477  | ISYNA1                                          | myo-inositol 1-phosphate synthase A1                                       | -5.23 | CCGCTCTAAGGAGGTGCCAA   | NM_016368: | NM_016368:                                                                   |
| 83737  | ITCH                                            | itchy homolog E3 ubiquitin protein ligase (mouse)                          | 1.57  | GACCGAGACATAAATATCTA   | NM_031483: | NM_031483:                                                                   |
| 83737  | ITCH                                            | itchy homolog E3 ubiquitin protein ligase (mouse)                          | 0.83  | TAGAGAGTTATCTGAGTGTA   | NM_031483: | NM_031483:                                                                   |
| 55846  | ITFG2                                           | integrin alpha FG-GAP repeat containing 2                                  | 1.12  | GACGTTGATAACGATACGTTA  | NM_018463: | NM_018463:                                                                   |
| 55846  | ITFG2                                           | integrin alpha FG-GAP repeat containing 2                                  | 0.39  | TAGGGAATATGCATTACAGAA  | NM_018463: | NM_018463:                                                                   |
| 3672   | ITGA1                                           | integrin, alpha 1                                                          | -1.65 | ACTGAGGACATTTGGAATGAA  | NM_181501: | NM_181501:                                                                   |
| 3672   | ITGA1                                           | integrin, alpha 1                                                          | -2.35 | CTGCATGTCGCCACCACCTGAA | NM_181501: | NM_181501:                                                                   |
| 8515   | ITGA10                                          | integrin, alpha 10                                                         | -0.96 | CTGGGTGTACCTAGCAGTAT   | NM_003637: | NM_003637:                                                                   |
| 8515   | ITGA10                                          | integrin, alpha 10                                                         | -0.89 | CACAAGAGACATTTCTGTACAA | NM_003637: | NM_003637:                                                                   |
| 22801  | ITGA11                                          | integrin, alpha 11                                                         | 0.93  | CGCCTACAGCACCGTCCATAA  | NM_012211: | NM_012211:NM_001004439:                                                      |
| 22801  | ITGA11                                          | integrin, alpha 11                                                         | 0.93  | ACCTGTTTGTATAACCGGAA   | NM_012211: | NM_012211:NM_001004439:                                                      |
| 3673   | ITGA2                                           | integrin, alpha 2 (CD49B, alpha 2 subunit of VLA-2 receptor)               | 0.38  | CCCGAGCACATCTTATATA    | NM_002203: | NM_002203:                                                                   |
| 3673   | ITGA2                                           | integrin, alpha 2 (CD49B, alpha 2 subunit of VLA-2 receptor)               | -1.18 | TGCGTAGTATCCAAACAGAAA  | NM_002203: | NM_002203:                                                                   |
| 3674   | ITGA2B                                          | integrin, alpha 2b (platelet glycoprotein IIb of IIb/IIIa complex, antigen | -4.05 | CAGCCAGAATCCAAACAGCAA  | NM_000419: | NM_000419:                                                                   |
| 3674   | ITGA2B                                          | integrin, alpha 2b (platelet glycoprotein IIb of IIb/IIIa complex, antigen | 0.73  | CCAAACCTTCAACACCTTCAA  | NM_000419: | NM_000419:                                                                   |
| 3675   | ITGA3                                           | integrin, alpha 3 (antigen CD49C, alpha 3 subunit of VLA-3 receptor)       | -0.43 | CACCTCAACATGGAGAACAA   | NM_002204: | NM_002204:NM_005501:                                                         |
| 3675   | ITGA3                                           | integrin, alpha 3 (antigen CD49C, alpha 3 subunit of VLA-3 receptor)       | -1.61 | CTGGATTGACCTTGTGTCAA   | NM_002204: | NM_002204:NM_005501:                                                         |
| 3676   | ITGA4                                           | integrin, alpha 4 (antigen CD49D, alpha 4 subunit of VLA-4 receptor)       | 1.68  | ACGACTCATCATGTCAAACCTA | NM_000885: | NM_000885:                                                                   |
| 3676   | ITGA4                                           | integrin, alpha 4 (antigen CD49D, alpha 4 subunit of VLA-4 receptor)       | 0.19  | CAGATTGGTAAGGCATATATA  | NM_000885: | NM_000885:                                                                   |
| 3678   | ITGA5                                           | integrin, alpha 5 (fibronectin receptor, alpha polypeptide)                | 0.06  | CCATTGAATTTGACAGCAA    | NM_002205: | NM_002205:                                                                   |
| 3678   | ITGA5                                           | integrin, alpha 5 (fibronectin receptor, alpha polypeptide)                | 0.94  | TGGGCCAACAAAGAACACTAA  | NM_002205: | NM_002205:                                                                   |
| 3655   | ITGA6                                           | integrin, alpha 6                                                          | 0.03  | CAGGTAATAAACCTTAGGTAA  | NM_000210: | NM_000210:                                                                   |
| 3655   | ITGA6                                           | integrin, alpha 6                                                          | -0.67 | CCGGCTGTGATTAATATTCA   | NM_000210: | NM_000210:                                                                   |
| 3679   | ITGA7                                           | integrin, alpha 7                                                          | -0.21 | CCAGTGATGGTACTTGGGA    | NM_002206: | NM_002206:                                                                   |
| 3679   | ITGA7                                           | integrin, alpha 7                                                          | -0.35 | CACAGTGAAGTCCTCCATAA   | NM_002206: | NM_002206:                                                                   |
| 8516   | ITGA8 (integrin                                 | integrin, alpha 8                                                          | 0.59  | CCGATTGCGTTTACTTTAA    | NM_003638: | NM_003638:                                                                   |
| 8516   | ITGA8 (integrin                                 | integrin, alpha 8                                                          | 1.21  | TCCGAGATAAATTTCTCCAA   | NM_003638: | NM_003638:                                                                   |
| 3680   | ITGA9                                           | integrin, alpha 9                                                          | -3.28 | ACCGAGATCAGGCACCTTAA   | NM_002207: | NM_002207:                                                                   |
| 3680   | ITGA9                                           | integrin, alpha 9                                                          | -0.19 | CCGAAGTCAAAAGAAATTTAT  | NM_002207: | NM_002207:                                                                   |
| 3680   | ITGA9                                           | integrin, alpha 9                                                          | 0.71  | AAGAGCAATCGGCTAGGTTTA  | BC028701:  | NM_002207:                                                                   |
| 3681   | ITGAD                                           | integrin, alpha D                                                          | 0.59  | CAGCTATTTCATCAAGAATA   | XM_496142: | NM_005353:                                                                   |
| 3681   | ITGAD                                           | integrin, alpha D                                                          | -3.13 | CAGGTGAGGATTCCTACGGAA  | XM_496142: | NM_005353:                                                                   |
| 3682   | ITGAE                                           | integrin, alpha E (antigen CD103, human mucosal lymphocyte antigen         | 0.49  | TTGGTATTAATAAATTTACA   | NM_002208: | NM_002208:                                                                   |
| 3682   | ITGAE                                           | integrin, alpha E (antigen CD103, human mucosal lymphocyte antigen         | 0.15  | TAGGAACATTTGGTATTAAA   | NM_002208: | NM_002208:                                                                   |
| 3683   | ITGAL                                           | integrin, alpha L (antigen CD11A (p180), lymphocyte function-associated    | -9.64 | CAGGGCGTGGGACATCTAGTA  | NM_002209: | NM_002209:                                                                   |
| 3683   | ITGAL                                           | integrin, alpha L (antigen CD11A (p180), lymphocyte function-associated    | 1.34  | CCCTGTTTAAATGATTGACGTA | NM_002209: | NM_002209:                                                                   |
| 3684   | ITGAM                                           | integrin, alpha M (complement component 3 receptor 3 subunit)              | 0.00  | TCGACATCGGTTCAATTTAA   | NM_000632: | NM_000632:                                                                   |
| 3684   | ITGAM                                           | integrin, alpha M (complement component 3 receptor 3 subunit)              | -0.53 | CTCGTTTGACTGGTACATCAA  | NM_000632: | NM_000632:                                                                   |
| 3685   | ITGAV                                           | integrin, alpha V (vitronectin receptor, alpha polypeptide, antigen CD5    | 2.42  | ATGTAGTAGTTTGTAGATAA   | NM_002210: | NM_002210:                                                                   |
| 3685   | ITGAV                                           | integrin, alpha V (vitronectin receptor, alpha polypeptide, antigen CD5    | 3.03  | CACATACATGATACCATCCAA  | NM_002210: | NM_002210:                                                                   |
| 3687   | ITGAX                                           | integrin, alpha X (complement component 3 receptor 4 subunit)              | -0.09 | CCGGCTGCTCTGACAGCCAA   | NM_000887: | NM_000887:                                                                   |
| 3687   | ITGAX                                           | integrin, alpha X (complement component 3 receptor 4 subunit)              | -1.45 | CTCCAGGAACACATATTTAA   | NM_000887: | NM_000887:                                                                   |
| 3688   | ITGB1                                           | integrin, beta 1 (fibronectin receptor, beta polypeptide, antigen CD29 i   | -0.22 | AAGAGGGATAATACAAATGAA  | NM_002211: | NM_002211:NM_033666:NM_033667:NM_033668:NM_033669:NM_133376:                 |
| 3688   | ITGB1                                           | integrin, beta 1 (fibronectin receptor, beta polypeptide, antigen CD29 i   | -0.46 | ACAGATGAAGTTAACAGTGAA  | NM_002211: | NM_002211:NM_033666:NM_033667:NM_033668:NM_033669:NM_133376:                 |
| 3689   | ITGB2                                           | integrin, beta 2 (complement component 3 receptor 3 and 4 subunit)         | 0.76  | TGCCAATTTATTTACATTTAA  | NM_000211: | NM_000211:                                                                   |
| 3689   | ITGB2                                           | integrin, beta 2 (complement component 3 receptor 3 and 4 subunit)         | -0.09 | CAGGACATCAGCTGATTAAA   | NM_000211: | NM_000211:                                                                   |
| 3690   | ITGB3                                           | integrin, beta 3 (platelet glycoprotein IIIa, antigen CD61)                | -0.51 | CACGTGTGGCCTGTTCTCTA   | NM_000212: | NM_000212:                                                                   |
| 3690   | ITGB3                                           | integrin, beta 3 (platelet glycoprotein IIIa, antigen CD61)                | -4.41 | CCGCTTCAATGAGGAAGTAA   | NM_000212: | NM_000212:                                                                   |
| 23421  | ITGB3BP                                         | integrin beta 3 binding protein (beta3-endonexin)                          | 1.80  | TAGCATTTGTTGGTATGACTTA | NM_014288: | NM_014288:                                                                   |
| 23421  | ITGB3BP                                         | integrin beta 3 binding protein (beta3-endonexin)                          | 1.84  | CAGAGAATATTTGTAATTTAA  | NM_014288: | NM_014288:                                                                   |
| 3691   | ITGB4                                           | integrin, beta 4                                                           | -0.72 | AACGATGACAACCGACTATT   | NM_000213: | NM_000213:NM_001005619:NM_001005731:NM_000213:                               |
| 3691   | ITGB4                                           | integrin, beta 4                                                           | -0.69 | GTGGATGAGTTCGGGAATAAA  | NM_000213: | NM_001005619:NM_001005731:NM_000213:NM_181466:NM_181467:NM_181468:NM_181469: |
| 3692   | ITGB4BP                                         | integrin beta 4 binding protein                                            | -0.51 | CTGGATCTACTACTGCAA     | NM_002212: | NM_002212:NM_181466:NM_181467:NM_181468:NM_181469:                           |
| 3692   | ITGB4BP                                         | integrin beta 4 binding protein                                            | -3.44 | AAGCTACTGTGCTTCAGCAA   | NM_002212: | NM_002212:                                                                   |
| 3693   | ITGB5                                           | integrin, beta 5                                                           | 0.22  | CAAGATTGTTGGGATTTGAA   | NM_002213: | NM_002213:                                                                   |
| 3693   | ITGB5                                           | integrin, beta 5                                                           | 2.05  | CCGCTATGAATGGCTTCAA    | NM_002213: | NM_002213:                                                                   |
| 3694   | ITGB6 (integrin                                 | integrin, beta 6                                                           | -5.94 | CTGGAATTAATGTCAGCCCA   | NM_000888: | NM_000888:                                                                   |
| 3694   | ITGB6 (integrin                                 | integrin, beta 6                                                           | 1.25  | AAGGACTCAACTGTCAATTTA  | NM_000888: | NM_000888:                                                                   |
| 3695   | ITGB7 (integrin                                 | integrin, beta 7                                                           | -1.44 | CAAGTACAATAAAGTCTTAA   | NM_000889: | NM_000889:                                                                   |
| 3695   | ITGB7 (integrin                                 | integrin, beta 7                                                           | 1.57  | CCGGCTCGGTTGGAATCTA    | NM_000889: | NM_000889:                                                                   |
| 3696   | ITGB8 (integrin                                 | integrin, beta 8                                                           | 1.26  | CAGATACAACCTTAATCTTAA  | NM_002214: | NM_002214:                                                                   |
| 3696   | ITGB8 (integrin                                 | integrin, beta 8                                                           | 0.44  | ATGCAGAAACGTGACGAGCAA  | NM_002214: | NM_002214:                                                                   |
| 3702   | ITK                                             | IL2-inducible T-cell kinase                                                | 0.11  | CAGGACTTTAGTAGAGACTGA  | NM_005546: | NM_005546:                                                                   |
| 3702   | ITK                                             | IL2-inducible T-cell kinase                                                | -0.14 | CTGGTGAGTTAAGTAAGATTA  | NM_005546: | NM_005546:                                                                   |
| 55600  | ITLN1                                           | intelectin 1 (galactofuranose binding)                                     | 0.09  | ACCCAGTAGCTAGAATGTTAA  | NM_017625: | NM_017625:                                                                   |
| 55600  | ITLN1                                           | intelectin 1 (galactofuranose binding)                                     | -1.28 | CTGCGGATTTGTTCCAGTTCA  | NM_017625: | NM_017625:                                                                   |
| 142683 | ITLN2                                           | intelectin 2                                                               | -3.24 | CACCAAGAAATGGTGTGCTCA  | NM_080878: | NM_080878:                                                                   |
| 142683 | ITLN2                                           | intelectin 2                                                               | 1.03  | TAGAAGTGCAAAAGAAATCAA  | NM_080878: | NM_080878:                                                                   |



|        |                                                          |                                                                     |        |                        |            |                                |
|--------|----------------------------------------------------------|---------------------------------------------------------------------|--------|------------------------|------------|--------------------------------|
| 9445   | ITM2B                                                    | integral membrane protein 2B                                        | -3.88  | TAGGTAGTAGGAAGAATTACA  | NM_021999: | NM_021999:                     |
| 9445   | ITM2B                                                    | integral membrane protein 2B                                        | 0.69   | TAGTAACGTATGAAGTCATA   | NM_021999: | NM_021999:                     |
| 3704   | ITPA                                                     | inosine triphosphatase (nucleoside triphosphate pyrophosphatase)    | -3.01  | CTGGAGAAGTTAAAGCCTGAA  | NM_033453: | NM_181493;NM_033453:           |
| 3704   | ITPA                                                     | inosine triphosphatase (nucleoside triphosphate pyrophosphatase)    | -15.90 | CTGGATGAGACTGTGTTCCAA  | NM_033453: | NM_181493;NM_033453:           |
| 3705   | ITPK1                                                    | inositol 1,3,4-triphosphate 5/6 kinase                              | 0.45   | CACGCCGTCATTGACATCAAT  | NM_014216: | NM_014216:                     |
| 3705   | ITPK1                                                    | inositol 1,3,4-triphosphate 5/6 kinase                              | -0.21  | CCGATTAATGTCTGTACGCTCA | NM_014216: | NM_014216:                     |
| 3706   | ITPKA (inositol 1,4,5-triphosphate 3-kinase A            |                                                                     | 0.17   | CACCAGCGGGCTGATCCTGAA  | NM_002220: | NM_002220:                     |
| 3706   | ITPKA (inositol 1,4,5-triphosphate 3-kinase A            |                                                                     | 0.11   | CCGGTCTAACGTCTCACACCA  | NM_002220: | NM_002220:                     |
| 3707   | ITPKB                                                    | inositol 1,4,5-triphosphate 3-kinase B                              | 0.54   | AAGGCCATTCGAACCACTCTA  | NM_002221: | NM_002221:                     |
| 3707   | ITPKB                                                    | inositol 1,4,5-triphosphate 3-kinase B                              | 0.98   | GACGTAAGATTTCTATGAATA  | NM_002221: | NM_002221:                     |
| 80271  | ITPKC (inositol 1,4,5-triphosphate 3-kinase C            |                                                                     | -1.56  | CCGGAAGACATGTATGAGAA   | NM_025194: | NM_025194:                     |
| 80271  | ITPKC (inositol 1,4,5-triphosphate 3-kinase C            |                                                                     | -0.15  | TCGGCCGAAGCCGCAACCCGAA | NM_025194: | NM_025194:                     |
| 3708   | ITPR1                                                    | inositol 1,4,5-triphosphate receptor, type 1                        | 1.05   | TGGTGTGTTAACTACTATGTA  | NM_002222: | NM_002222:                     |
| 3708   | ITPR1                                                    | inositol 1,4,5-triphosphate receptor, type 1                        | -0.64  | AACTACGAATTTACTATACTA  | NM_002222: | NM_002222:                     |
| 3709   | ITPR2                                                    | inositol 1,4,5-triphosphate receptor, type 2                        | 0.03   | CGGAATCAACATCAACGATTA  | NM_002223: | NM_002223:                     |
| 3709   | ITPR2                                                    | inositol 1,4,5-triphosphate receptor, type 2                        | 0.62   | CCAGTTCACCTTGACGATGAA  | NM_002223: | NM_002223:                     |
| 3710   | ITPR3                                                    | inositol 1,4,5-triphosphate receptor, type 3                        | 0.53   | TCAGTTTACCTTAATGCCTTA  | NM_002224: | NM_002224:                     |
| 3710   | ITPR3                                                    | inositol 1,4,5-triphosphate receptor, type 3                        | -0.45  | CCGCAGCATGCCGGTGATCTA  | NM_002224: | NM_002224:                     |
| 160897 | ITR                                                      | intimal thickness-related receptor                                  | 2.00   | ATGCCTCATCTTAATAGCTAA  | NM_180989: | NM_180989:                     |
| 160897 | ITR                                                      | intimal thickness-related receptor                                  | -1.27  | CCCAATCATAATTAAGCCGTA  | NM_180989: | NM_180989:                     |
| 50618  | ITSN2                                                    | intersectin 2                                                       | -3.39  | TTGGCGGGCCCTGATACCTGAA | NM_006277: | NM_006277;NM_019595:           |
| 50618  | ITSN2                                                    | intersectin 2                                                       | -0.59  | CACCAGGACAGTTAATATTA   | NM_006277: | NM_147152;NM_006277;NM_019595: |
| 3712   | IVD                                                      | isovaleryl Coenzyme A dehydrogenase                                 | -0.21  | CAGCTTGATCGCAATGGGAAT  | NM_002225: | NM_002225:                     |
| 3712   | IVD                                                      | isovaleryl Coenzyme A dehydrogenase                                 | 0.47   | TCGCAGCAATGAGTTCAAGAA  | NM_002225: | NM_002225:                     |
| 182    | JAG1                                                     | jagged 1 (Alagille syndrome)                                        | 0.34   | CAGAGTAATCTTGTGGTTCA   | NM_000214: | NM_000214:                     |
| 182    | JAG1                                                     | jagged 1 (Alagille syndrome)                                        | -0.57  | CTGCATTTAGGGAGTATTCTA  | NM_000214: | NM_000214:                     |
| 3714   | JAG2                                                     | jagged 2                                                            | 0.62   | CTGCCTGTCACCAAACTGTA   | NM_002226: | NM_002226;NM_145159:           |
| 3714   | JAG2                                                     | jagged 2                                                            | 0.62   | CTACGTTTTCTTAACTTGTGA  | NM_002226: | NM_002226;NM_145159:           |
| 3716   | JAK1                                                     | Janus kinase 1 (a protein tyrosine kinase)                          | -16.81 | ACCGGATGAGGTTCTATTCTA  | NM_002227: | NM_002227:                     |
| 3716   | JAK1                                                     | Janus kinase 1 (a protein tyrosine kinase)                          | 0.06   | CACGCAATCAACATGCTTCAT  | NM_002227: | NM_002227:                     |
| 3717   | JAK2 (Janus 1;Janus kinase 2 (a protein tyrosine kinase) |                                                                     | 0.42   | AGCCATCATACGAGATCTTAA  | NM_004972: | NM_004972:                     |
| 3717   | JAK2 (Janus 1;Janus kinase 2 (a protein tyrosine kinase) |                                                                     | 0.03   | CAGAATTAGCAAACTTATAA   | NM_004972: | NM_004972:                     |
| 3718   | JAK3                                                     | Janus kinase 3 (a protein tyrosine kinase, leukocyte)               | 0.71   | AGGCCTTATGAGGGTCCCTCA  | NM_000215: | NM_000215:                     |
| 3718   | JAK3                                                     | Janus kinase 3 (a protein tyrosine kinase, leukocyte)               | 0.47   | CGGGAGATTAGATCCTCAAA   | NM_000215: | NM_000215:                     |
| 152789 | JAKMIP1                                                  | janus kinase and microtubule interacting protein 1                  | 0.75   | CGGACTGCCATCCTCCTCAA   | NM_144720: | NM_144720:                     |
| 152789 | JAKMIP1                                                  | janus kinase and microtubule interacting protein 1                  | -0.56  | CACGTCATTGACGACCTCTCA  | NM_144720: | NM_144720:                     |
| 58494  | JAM2                                                     | junctional adhesion molecule 2                                      | -0.81  | CCCGCGCGGACGACACACAAA  | NM_021219: | NM_021219:                     |
| 58494  | JAM2                                                     | junctional adhesion molecule 2                                      | -0.74  | CTCAACATAAGTGGCATCATCA | NM_021219: | NM_021219:                     |
| 83700  | JAM3                                                     | junctional adhesion molecule 3                                      | 0.00   | TAGGGTGATCTTAAAGAGTTT  | NM_032801: | NM_032801:                     |
| 83700  | JAM3                                                     | junctional adhesion molecule 3                                      | 1.09   | ACGGAGAGACTGACCCCTTTA  | NM_032801: | NM_032801:                     |
| 5827   | JARID1A                                                  | Jumonji, AT rich interactive domain 1A (RBBP2-like)                 | 0.01   | AAGGAATGGTATCAGAGTCTA  | NM_005056: | NM_005056:                     |
| 5827   | JARID1A                                                  | Jumonji, AT rich interactive domain 1A (RBBP2-like)                 | 0.26   | CAGATGCTTAATTTAGAGCTCA | NM_005056: | NM_005056:                     |
| 10765  | JARID1B                                                  | Jumonji, AT rich interactive domain 1B (RBP2-like)                  | 0.33   | GAGAAGTGTCTGTAAAGTAA   | NM_005377: | NM_005377:                     |
| 10765  | JARID1B                                                  | Jumonji, AT rich interactive domain 1B (RBP2-like)                  | 0.50   | TCGCTCAACATAACACTAAA   | NM_006618: | NM_006618:                     |
| 10765  | JARID1B                                                  | Jumonji, AT rich interactive domain 1B (RBP2-like)                  | 0.27   | ACGCACCAAGCCGAAAGTAAA  | NM_006618: | NM_006618:                     |
| 221895 | JAZF1                                                    | juxtaposed with another zinc finger gene 1                          | -3.73  | ATGAGCCTATTGACAATTA    | NM_175061: | NM_175061:                     |
| 221895 | JAZF1                                                    | juxtaposed with another zinc finger gene 1                          | 0.89   | ACGCAACTAGTTGGTGCATAA  | NM_175061: | NM_175061:                     |
| 221037 | JMJD1C                                                   | jumonji domain containing 1C                                        | -0.20  | CTGGGATTACTTAACCTTGAA  | NM_004241: | NM_004241:                     |
| 221037 | JMJD1C                                                   | jumonji domain containing 1C                                        | -0.55  | CACCAGTATTTCCACCACCAA  | NM_004241: | NM_004241:                     |
| 9682   | JMJD2A                                                   | jumonji domain containing 2A                                        | 0.21   | TAGGACTTGGCTCATAACTA   | NM_014663: | NM_014663:                     |
| 9682   | JMJD2A                                                   | jumonji domain containing 2A                                        | 1.61   | ACGAGTTTCAACTCAAGATA   | NM_014663: | NM_014663:                     |
| 23030  | JMJD2B                                                   | jumonji domain containing 2B                                        | 0.55   | CACCTGACAAATCCTAGCGAA  | NM_015015: | NM_015015:                     |
| 23030  | JMJD2B                                                   | jumonji domain containing 2B                                        | 1.50   | AAGCAATGTTTATATATAAA   | NM_015015: | NM_015015:                     |
| 23081  | JMJD2C                                                   | jumonji domain containing 2C                                        | 0.41   | AGCGGGTAGGGCGATAATTTA  | NM_015061: | NM_015061:                     |
| 23081  | JMJD2C                                                   | jumonji domain containing 2C                                        | 0.02   | CCGAGAAGTCGATCACTAA    | NM_015061: | NM_015061:                     |
| 9929   | JOSD1                                                    | Josephin domain containing 1                                        | 0.78   | TTTGTTTAACCAAAATATAAA  | NM_014876: | NM_014876:                     |
| 9929   | JOSD1                                                    | Josephin domain containing 1                                        | -0.36  | CAACCTCGACTCCAACTCAA   | NM_014876: | NM_014876:                     |
| 126119 | JOSD2                                                    | Josephin domain containing 2                                        | -1.37  | CTGCCGTGCTGCTCAATAA    | NM_138334: | NM_138334:                     |
| 126119 | JOSD2                                                    | Josephin domain containing 2                                        | -0.03  | CTGGAAAGGCCGACACTTCA   | NM_138334: | NM_138334:                     |
| 57338  | JPH3                                                     | junctophilin 3                                                      | -0.07  | TCGCTCCATCACCACAAACAA  | NM_020655: | NM_020655:                     |
| 57338  | JPH3                                                     | junctophilin 3                                                      | -0.70  | CAGGACAGGAATGGGGTTCAA  | NM_020655: | NM_020655:                     |
| 3725   | JUN                                                      | v-jun sarcoma virus 17 oncogene homolog (avian)                     | -1.45  | AAGAAGTGTCCGGAAGACTAAA | NM_002228: | NM_002228:                     |
| 3725   | JUN                                                      | v-jun sarcoma virus 17 oncogene homolog (avian)                     | -2.74  | CGCGCGGAGTGCGCAAGTAA   | NM_002228: | NM_002228:                     |
| 3726   | JUNB (jun B ;jun B proto-oncogene                        |                                                                     | 0.13   | AAACACGCACTTATGCTCTAA  | NM_002229: | NM_002229:                     |
| 3726   | JUNB (jun B ;jun B proto-oncogene                        |                                                                     | 0.01   | CTCGATTTCATTTGAATATA   | NM_002229: | NM_002229:                     |
| 3727   | JUND (jun D ;jun D proto-oncogene                        |                                                                     | 0.02   | GAGGATGGAACACCCCTCTA   | NM_005354: | NM_005354:                     |
| 3727   | JUND (jun D ;jun D proto-oncogene                        |                                                                     | -0.37  | GGCCTTGGAAGAGAAGTAA    | NM_005354: | NM_005354:                     |
| 3728   | JUP                                                      | junction plakoglobin                                                | 0.32   | ATGCCTACTACAGTTATGAA   | NM_002230: | NM_021991;NM_002230:           |
| 3728   | JUP                                                      | junction plakoglobin                                                | 0.34   | CCAGAGCATGATTCCTATCAA  | NM_002230: | NM_021991;NM_002230:           |
| 10376  | K-ALPHA-1                                                | tubulin, alpha, ubiquitous                                          | 0.03   | CCCGCCCTAGTGGTACTTTA   | NM_006082: | NM_006082:                     |
| 10376  | K-ALPHA-1                                                | tubulin, alpha, ubiquitous                                          | -1.22  | AAGGAGAGGAATACTAATAT   | NM_006082: | NM_006082:                     |
| 8997   | KALRN                                                    | kallirin, RhoGEF kinase                                             | 0.82   | TGGGCTGTGTCACCAACAAA   | NM_003947: | NM_003947;NM_01024660:         |
| 8997   | KALRN                                                    | kallirin, RhoGEF kinase                                             | -0.34  | AGGACTGTCTTTGACTTGAA   | NM_003947: | NM_003947:                     |
| 8997   | KALRN                                                    | kallirin, RhoGEF kinase                                             | 0.40   | CAGGACATCAACTCAAGTCTTA | NM_007064: | NM_007064;NM_01024660:         |
| 8997   | KALRN                                                    | kallirin, RhoGEF kinase                                             | 0.81   | CCCATGAGTATCAACGGAAA   | NM_007064: | NM_007064;NM_01024660:         |
| 3736   | KCNA1                                                    | potassium voltage-gated channel, shaker-related subfamily, member 1 | -0.01  | AAGCTACTGACCGATGTTTAA  | NM_000217: | NM_000217:                     |
| 3736   | KCNA1                                                    | potassium voltage-gated channel, shaker-related subfamily, member 1 | 0.51   | CCCATATAGACAGGTCATA    | NM_000217: | NM_000217:                     |
| 3744   | KCNA10                                                   | potassium voltage-gated channel, shaker-related subfamily, member 1 | -0.98  | CAGCACAGACTCTCTTAATA   | NM_005549: | NM_005549:                     |
| 3744   | KCNA10                                                   | potassium voltage-gated channel, shaker-related subfamily, member 1 | -0.85  | CACCGGGAGACTGAGAATGAA  | NM_005549: | NM_005549:                     |
| 3737   | KCNA2                                                    | potassium voltage-gated channel, shaker-related subfamily, member 2 | -3.76  | CTGTTCTGCATGGAAGCAAA   | NM_004974: | NM_004974:                     |
| 3737   | KCNA2                                                    | potassium voltage-gated channel, shaker-related subfamily, member 2 | 1.10   | TACCATTAGTAAGTCTGATTA  | NM_004974: | NM_004974:                     |
| 3738   | KCNA3                                                    | potassium voltage-gated channel, shaker-related subfamily, member 3 | 0.54   | AACTAGAATAATGACTGTAA   | NM_002232: | NM_002232:                     |
| 3738   | KCNA3                                                    | potassium voltage-gated channel, shaker-related subfamily, member 3 | 1.48   | AGCACATCAATTCGTAGTAAA  | NM_002232: | NM_002232:                     |
| 3739   | KCNA4                                                    | potassium voltage-gated channel, shaker-related subfamily, member 4 | 0.59   | CAGCATTCCTCAATATATTTA  | NM_002233: | NM_002233:                     |
| 3739   | KCNA4                                                    | potassium voltage-gated channel, shaker-related subfamily, member 4 | -3.53  | CAGAGGGGATGACCACTACTA  | NM_002233: | NM_002233:                     |
| 3741   | KCNA5                                                    | potassium voltage-gated channel, shaker-related subfamily, member 5 | 1.55   | AGGAATCTCTGTATAATTTA   | NM_002234: | NM_002234:                     |
| 3741   | KCNA5                                                    | potassium voltage-gated channel, shaker-related subfamily, member 5 | 0.76   | CAGAGGGATAACCCAAACAAA  | NM_002234: | NM_002234:                     |
| 3742   | KCNA6                                                    | potassium voltage-gated channel, shaker-related subfamily, member 6 | 0.74   | CTGATCTTGCCTAATCTTTA   | NM_002235: | NM_002235:                     |
| 3742   | KCNA6                                                    | potassium voltage-gated channel, shaker-related subfamily, member 6 | 0.14   | CTGGTGTTCGCTACACTTTA   | NM_002235: | NM_002235:                     |
| 3743   | KCNA7                                                    | potassium voltage-gated channel, shaker-related subfamily, member 7 | 0.61   | AGGCTTCCTTTGGTATCAAA   | NM_031886: | NM_031886:                     |
| 3743   | KCNA7                                                    | potassium voltage-gated channel, shaker-related subfamily, member 7 | -0.08  | AGCGAGTTGAGTTGTGTTGAA  | NM_031886: | NM_031886:                     |
| 7881   | KCNAB1                                                   | potassium voltage-gated channel, shaker-related subfamily, beta mem | 0.65   | TAAGCTGCACTGAATCACTAA  | NM_172159: | NM_172159:                     |
| 7881   | KCNAB1                                                   | potassium voltage-gated channel, shaker-related subfamily, beta mem | 0.78   | GAGGTGCTGCTAATGGGAAA   | NM_172159: | NM_172159;NM_003471;NM_172160: |
| 8514   | KCNAB2                                                   | potassium voltage-gated channel, shaker-related subfamily, beta mem | -1.89  | AAGAGTGTGGTTGCATCCAA   | NM_003636: | NM_003636;NM_172130:           |
| 8514   | KCNAB2                                                   | potassium voltage-gated channel, shaker-related subfamily, beta mem | 1.34   | ATCCAGGAGATTGATGATTT   | NM_003636: | NM_003636;NM_172130:           |
| 9196   | KCNAB3                                                   | potassium voltage-gated channel, shaker-related subfamily, beta mem | -1.59  | TCGAGTAGTGATACGATGAA   | NM_004732: | NM_004732:                     |
| 9196   | KCNAB3                                                   | potassium voltage-gated channel, shaker-related subfamily, beta mem | 0.38   | CCGAGCGAGGTTTAAAGCCGAA | NM_004732: | NM_004732:                     |
| 3745   | KCNB1                                                    | potassium voltage-gated channel, Shab-related subfamily, member 1   | -1.13  | CACGCTTTTTCATCACTACTA  | NM_004975: | NM_004975:                     |
| 3745   | KCNB1                                                    | potassium voltage-gated channel, Shab-related subfamily, member 1   | 0.73   | TCGGTATTTTCATGACCTGA   | NM_004975: | NM_004975:                     |

|        |        |                                                                      |       |                        |            |                                                                            |
|--------|--------|----------------------------------------------------------------------|-------|------------------------|------------|----------------------------------------------------------------------------|
| 9312   | KCNB2  | potassium voltage-gated channel, Shab-related subfamily, member 2    | 0.25  | GCGGTTAATAATGCCTGTGAA  | NM_004770: | NM_004770:                                                                 |
| 9312   | KCNB2  | potassium voltage-gated channel, Shab-related subfamily, member 2    | -0.07 | CCCAGTTGACATACTGTGAA   | NM_004770: | NM_004770:                                                                 |
| 9312   | KCNB2  | potassium voltage-gated channel, Shab-related subfamily, member 2    | -0.25 | CTGGAGCAGGCTGCCAGGAA   | XR_000198: | NM_004770:                                                                 |
| 3746   | KCNC1  | potassium voltage-gated channel, Shaw-related subfamily, member 1    | -0.38 | CAGCTGGGATCTCCCAATTAT  | NM_004976: | NM_004976:                                                                 |
| 3746   | KCNC1  | potassium voltage-gated channel, Shaw-related subfamily, member 1    | 1.55  | GGCCATCTGGCCGATCTTTAA  | NM_004976: | NM_004976:                                                                 |
| 3747   | KCNC2  | potassium voltage-gated channel, Shaw-related subfamily, member 2    | 1.54  | AAGCTGTGACGTGTCTTTAA   | NM_139136: | NM_139136.NM_153748:                                                       |
| 3747   | KCNC2  | potassium voltage-gated channel, Shaw-related subfamily, member 2    | 1.13  | GAGGCCAGATCTCTACTTAA   | NM_139136: | NM_139136.NM_153748:                                                       |
| 3748   | KCNC3  | potassium voltage-gated channel, Shaw-related subfamily, member 3    | -0.05 | CACACTGTGTGCTGGATCTTGA | NM_004977: | NM_004977:                                                                 |
| 3748   | KCNC3  | potassium voltage-gated channel, Shaw-related subfamily, member 3    | -2.17 | AAGCTTCTGCCCGACCTCAA   | NM_004977: | NM_004977:                                                                 |
| 3749   | KCNC4  | potassium voltage-gated channel, Shaw-related subfamily, member 4    | 0.66  | TGGGTGGAATGCCCAAGAAA   | NM_004978: | NM_004978:                                                                 |
| 3749   | KCNC4  | potassium voltage-gated channel, Shaw-related subfamily, member 4    | 0.05  | CACATATAGTATCTATTTC    | NM_004978: | NM_004978:                                                                 |
| 3750   | KCND1  | potassium voltage-gated channel, Shal-related subfamily, member 1    | 0.05  | CCGGCCTGGGATGTTCTGAA   | NM_004979: | NM_004979:                                                                 |
| 3750   | KCND1  | potassium voltage-gated channel, Shal-related subfamily, member 1    | 0.20  | CAGCATTACATCTGCCCTAA   | NM_004979: | NM_004979:                                                                 |
| 3751   | KCND2  | potassium voltage-gated channel, Shal-related subfamily, member 2    | -2.39 | AAGTTGTAGTGAACACAA     | NM_012281: | NM_012281:                                                                 |
| 3751   | KCND2  | potassium voltage-gated channel, Shal-related subfamily, member 2    | 1.34  | ATGGAAGAGTGTGTTAACTA   | NM_012281: | NM_012281:                                                                 |
| 3752   | KCND3  | potassium voltage-gated channel, Shal-related subfamily, member 3    | 1.00  | CAGCCTTAATTTGAAGCAGA   | NM_172198: | NM_172198.NM_004980:                                                       |
| 3752   | KCND3  | potassium voltage-gated channel, Shal-related subfamily, member 3    | 0.02  | TGCTCCAGCCTTAATTGAA    | NM_172198: | NM_172198.NM_004980:                                                       |
| 3753   | KCNE1  | potassium voltage-gated channel, Isk-related family, member 1        | -2.24 | AACGGGATCTTCCGGCTCT    | NM_000219: | NM_000219:                                                                 |
| 3753   | KCNE1  | potassium voltage-gated channel, Isk-related family, member 1        | -2.53 | AAGAGAAGGACAAGGCCATG   | NM_000219: | NM_000219:                                                                 |
| 23630  | KCNE1L | KCNE1-like                                                           | 0.82  | TAAAGTTGTTTAAACAATA    | NM_012282: | NM_012282:                                                                 |
| 23630  | KCNE1L | KCNE1-like                                                           | 0.60  | GTGGATAGAAATGAACTTAA   | NM_012282: | NM_012282:                                                                 |
| 9992   | KCNE2  | potassium voltage-gated channel, Isk-related family, member 2        | 1.19  | TAAATCAATCAATGATGAA    | NM_172201: | NM_172201:                                                                 |
| 9992   | KCNE2  | potassium voltage-gated channel, Isk-related family, member 2        | 0.03  | CCAAATGCTTGTGCTAGAA    | NM_172201: | NM_172201:                                                                 |
| 10008  | KCNE3  | potassium voltage-gated channel, Isk-related family, member 3        | 0.15  | CGCACCTAAATTTATTATA    | NM_005472: | NM_005472:                                                                 |
| 10008  | KCNE3  | potassium voltage-gated channel, Isk-related family, member 3        | -1.14 | TGCGACCTAAATTTATTATA   | NM_005472: | NM_005472:                                                                 |
| 23704  | KCNE4  | potassium voltage-gated channel, Isk-related family, member 4        | -0.46 | CCAGCCATTTGACACATAAA   | NM_080671: | NM_080671:                                                                 |
| 23704  | KCNE4  | potassium voltage-gated channel, Isk-related family, member 4        | -1.77 | CCAGCCCATTTGACACATAAA  | NM_080671: | NM_080671:                                                                 |
| 3754   | KCNF1  | potassium voltage-gated channel, subfamily F, member 1               | -3.70 | CCGCTTGTATCTCCCTCAA    | NM_002236: | NM_002236:                                                                 |
| 3754   | KCNF1  | potassium voltage-gated channel, subfamily F, member 1               | 0.80  | CCGCATGATGGAGCTGACCAA  | NM_002236: | NM_002236:                                                                 |
| 3755   | KCNF1  | potassium voltage-gated channel, subfamily F, member 1               | 0.02  | CCGGGAAGAACACTAGAACAA  | NM_002237: | NM_002237:                                                                 |
| 3755   | KCNF1  | potassium voltage-gated channel, subfamily F, member 1               | -2.13 | CTGGACACAGAGACAATAA    | NM_002237: | NM_002237:                                                                 |
| 26251  | KCNG2  | potassium voltage-gated channel, subfamily G, member 2               | -1.11 | CCGGGACGAGTCTCTTCGA    | NM_012283: | NM_012283:                                                                 |
| 26251  | KCNG2  | potassium voltage-gated channel, subfamily G, member 2               | -1.78 | CCGGTCACTCCATCTTCCA    | NM_012283: | NM_012283:                                                                 |
| 170850 | KCNG3  | potassium voltage-gated channel, subfamily G, member 3               | -4.07 | CTGACTAATAGCCATGTTAA   | NM_133329: | NM_172344.NM_133329:                                                       |
| 170850 | KCNG3  | potassium voltage-gated channel, subfamily G, member 3               | -3.12 | TAGATTATTAGACTAGATAA   | NM_133329: | NM_172344.NM_133329:                                                       |
| 93107  | KCNG4  | potassium voltage-gated channel, subfamily G, member 4               | -1.64 | TTGCCTATCATGCATGTAA    | NM_172347: | NM_172347:                                                                 |
| 93107  | KCNG4  | potassium voltage-gated channel, subfamily G, member 4               | -0.68 | ATGAACGATGTCAATGACCTA  | NM_172347: | NM_172347:                                                                 |
| 3756   | KCNH1  | potassium voltage-gated channel, subfamily H (eag-related), member 1 | 1.12  | TGCGGGTCCAATGATACTAA   | NM_002238: | NM_002238.NM_172362:                                                       |
| 3756   | KCNH1  | potassium voltage-gated channel, subfamily H (eag-related), member 1 | -0.96 | CTGAGATACTCAGATATTTAA  | NM_002238: | NM_002238.NM_172362:                                                       |
| 3757   | KCNH2  | potassium voltage-gated channel, subfamily H (eag-related), member 2 | -0.96 | CTGGGACACAGATAGGCAAA   | NM_000238: | NM_172057.NM_172056.NM_000238:                                             |
| 3757   | KCNH2  | potassium voltage-gated channel, subfamily H (eag-related), member 2 | -0.02 | CCGTGAGATCAATGACACCTAA | NM_000238: | NM_172056.NM_000238:                                                       |
| 23416  | KCNH3  | potassium voltage-gated channel, subfamily H (eag-related), member 3 | -0.03 | CAAGGACATCAGCGAACCAA   | NM_012284: | NM_012284:                                                                 |
| 23416  | KCNH3  | potassium voltage-gated channel, subfamily H (eag-related), member 3 | -1.45 | CCGTACACACTTGTGTCCA    | NM_012284: | NM_012284:                                                                 |
| 23415  | KCNH4  | potassium voltage-gated channel, subfamily H (eag-related), member 4 | -1.77 | CAGCCGATGAAGGACCTCAA   | NM_012285: | NM_012285:                                                                 |
| 23415  | KCNH4  | potassium voltage-gated channel, subfamily H (eag-related), member 4 | 0.12  | CGGCACTGTACTCTACTCTAA  | NM_012285: | NM_012285:                                                                 |
| 27133  | KCNH5  | potassium voltage-gated channel, subfamily H (eag-related), member 5 | 0.08  | CTAAACATGGTCCATGTCAA   | NM_139318: | NM_139318.NM_172375.NM_172376:                                             |
| 27133  | KCNH5  | potassium voltage-gated channel, subfamily H (eag-related), member 5 | -1.55 | TAAGCTCAATAAGGTGAACCTA | NM_139318: | NM_139318.NM_172375.NM_172376:                                             |
| 81033  | KCNH6  | potassium voltage-gated channel, subfamily H (eag-related), member 6 | -1.85 | CACGCCAGCTACATTCTGGAA  | NM_030779: | NM_173092.NM_030779:                                                       |
| 81033  | KCNH6  | potassium voltage-gated channel, subfamily H (eag-related), member 6 | 0.01  | CGCGTAGCCGTCAAGTTCAA   | NM_030779: | NM_173092.NM_030779:                                                       |
| 90134  | KCNH7  | potassium voltage-gated channel, subfamily H (eag-related), member 7 | 0.34  | AGCAGTTAGGATGAAATATA   | NM_033272: | NM_033272:                                                                 |
| 90134  | KCNH7  | potassium voltage-gated channel, subfamily H (eag-related), member 7 | 0.81  | TAGAGTTGACTTCAACCTAA   | NM_033272: | NM_033272:                                                                 |
| 131096 | KCNH8  | potassium voltage-gated channel, subfamily H (eag-related), member 8 | 0.38  | CAAGACTATCAAAACAATCTA  | NM_144633: | NM_144633:                                                                 |
| 131096 | KCNH8  | potassium voltage-gated channel, subfamily H (eag-related), member 8 | 1.19  | CAGACTTTGGTAAACAATCCAA | NM_144633: | NM_144633:                                                                 |
| 30820  | KCNIP1 | Kv channel interacting protein 1                                     | 0.53  | CTGGTAGTACAAGCTTTTAA   | NM_014592: | NM_001034837.NM_014592.NM_001034838:                                       |
| 30820  | KCNIP1 | Kv channel interacting protein 1                                     | 0.26  | TCCAGAAACGAGGACCAATAA  | NM_014592: | NM_001034837.NM_014592.NM_001034838:                                       |
| 30819  | KCNIP2 | Kv channel interacting protein 2                                     | -0.02 | TTCAGTAGAATCTCAATCAA   | NM_014591: | NM_173342.NM_173192.NM_173194.NM_173195:<br>NM_173191.NM_014591.NM_173193: |
| 30819  | KCNIP2 | Kv channel interacting protein 2                                     | -1.04 | CAGATTATGATGCTCAGGCA   | NM_014591: | NM_173342.NM_173192.NM_173194.NM_173195:<br>NM_173191.NM_014591.NM_173193: |
| 30818  | KCNIP3 | Kv channel interacting protein 3, calsenilin                         | -0.36 | CCCACATAAATCATCTCCATCA | NM_013434: | NM_013434.NM_001034914:                                                    |
| 30818  | KCNIP3 | Kv channel interacting protein 3, calsenilin                         | -3.06 | CAGGAACATCCCACATAATA   | NM_013434: | NM_013434.NM_001034914:                                                    |
| 80333  | KCNIP4 | Kv channel interacting protein 4                                     | -1.40 | ACGATATGATGGATAAATGTA  | NM_025221: | NM_025221.NM_147181.NM_147182.NM_147183:<br>NM_001035003.NM_001035004:     |
| 80333  | KCNIP4 | Kv channel interacting protein 4                                     | 1.64  | CCCAGTGGTGTGTTAATGAA   | NM_025221: | NM_025221.NM_147181.NM_147182.NM_147183:<br>NM_001035003.NM_001035004:     |
| 3758   | KCNJ1  | potassium inwardly-rectifying channel, subfamily J, member 1         | 1.44  | TACGTTTAGACAGAGGCTAAA  | NM_000220: | NM_000220.NM_153765.NM_153764.NM_153766:<br>NM_153767:                     |
| 3758   | KCNJ1  | potassium inwardly-rectifying channel, subfamily J, member 1         | -0.05 | CTCCATAGTATCCAAGACAA   | NM_000220: | NM_000220.NM_153765.NM_153764.NM_153766:<br>NM_153767:                     |
| 3766   | KCNJ10 | potassium inwardly-rectifying channel, subfamily J, member 10        | -5.13 | CAGGCTTTGCTTTAAGTTGCA  | NM_002241: | NM_002241:                                                                 |
| 3766   | KCNJ10 | potassium inwardly-rectifying channel, subfamily J, member 10        | 0.80  | TGGGTTCTCAACTTTATTCAA  | NM_002241: | NM_002241:                                                                 |
| 3767   | KCNJ11 | potassium inwardly-rectifying channel, subfamily J, member 11        | -2.04 | AAGGCACCTTGTCACTATGCTA | NM_000525: | NM_000525:                                                                 |
| 3767   | KCNJ11 | potassium inwardly-rectifying channel, subfamily J, member 11        | -2.76 | CAGCGCTTTGTGCCATTTGTA  | NM_000525: | NM_000525:                                                                 |
| 3768   | KCNJ12 | potassium inwardly-rectifying channel, subfamily J, member 12        | 0.88  | TGGGTGAGACTGTTTACAAA   | NM_021012: | NM_021012:                                                                 |
| 3768   | KCNJ12 | potassium inwardly-rectifying channel, subfamily J, member 12        | -0.33 | CAGCGCCAACTCCTTGTGCTA  | NM_021012: | NM_021012:                                                                 |
| 3769   | KCNJ13 | potassium inwardly-rectifying channel, subfamily J, member 13        | -0.69 | CACATGGATGGCAAACTCAAT  | NM_002242: | NM_002242:                                                                 |
| 3769   | KCNJ13 | potassium inwardly-rectifying channel, subfamily J, member 13        | 0.50  | ATCGCCTTACTTGCATACAA   | NM_002242: | NM_002242:                                                                 |
| 3770   | KCNJ14 | potassium inwardly-rectifying channel, subfamily J, member 14        | 0.13  | AAGACTGAAGTGACAGATTAA  | NM_013348: | NM_170720.NM_013348:                                                       |
| 3770   | KCNJ14 | potassium inwardly-rectifying channel, subfamily J, member 14        | 0.80  | CTGGATTCACTAAGATTCAA   | NM_013348: | NM_170720.NM_013348:                                                       |
| 3772   | KCNJ15 | potassium inwardly-rectifying channel, subfamily J, member 15        | -2.53 | CTGAAGTGAAGAACCTATAA   | NM_002243: | NM_002243.NM_170736.NM_170737:                                             |
| 3772   | KCNJ15 | potassium inwardly-rectifying channel, subfamily J, member 15        | 1.00  | GACCACATATTAGACATGAA   | NM_002243: | NM_002243.NM_170736.NM_170737:                                             |
| 3773   | KCNJ16 | potassium inwardly-rectifying channel, subfamily J, member 16        | -0.50 | AAGCTTAATATTAGAGACCCA  | NM_018658: | NM_018658.NM_170741.NM_170742:                                             |
| 3773   | KCNJ16 | potassium inwardly-rectifying channel, subfamily J, member 16        | -1.07 | CCGTAACATTTGTCATGAA    | NM_018658: | NM_018658.NM_170741.NM_170742:                                             |
| 3759   | KCNJ2  | potassium inwardly-rectifying channel, subfamily J, member 2         | 1.70  | CAACTCTCTTATGGTTATA    | NM_000891: | NM_000891:                                                                 |
| 3759   | KCNJ2  | potassium inwardly-rectifying channel, subfamily J, member 2         | -2.42 | AGGGTCAATGAGAGCCATAAA  | NM_000891: | NM_000891:                                                                 |
| 3760   | KCNJ3  | potassium inwardly-rectifying channel, subfamily J, member 3         | -0.69 | CTGTGTGAAGTTACACAATTA  | NM_002239: | NM_002239:                                                                 |
| 3760   | KCNJ3  | potassium inwardly-rectifying channel, subfamily J, member 3         | 0.39  | AAGGCTACTGGCATAATTAT   | NM_002239: | NM_002239:                                                                 |
| 3761   | KCNJ4  | potassium inwardly-rectifying channel, subfamily J, member 4         | 0.03  | CCCGCTTTATGGCATTGGCAA  | NM_152868: | NM_152868.NM_004981:                                                       |
| 3761   | KCNJ4  | potassium inwardly-rectifying channel, subfamily J, member 4         | -7.04 | CTGGCCGCTACATGCTATGAT  | NM_152868: | NM_152868.NM_004981:                                                       |
| 3762   | KCNJ5  | potassium inwardly-rectifying channel, subfamily J, member 5         | -0.99 | CCCGGAGCTCTACATGGATA   | NM_000890: | NM_000890:                                                                 |
| 3762   | KCNJ5  | potassium inwardly-rectifying channel, subfamily J, member 5         | -7.50 | CTCCATGAGATCAACCAAGAA  | NM_000890: | NM_000890:                                                                 |
| 3763   | KCNJ6  | potassium inwardly-rectifying channel, subfamily J, member 6         | -4.21 | CCGCTGATCATTAGCCATGAA  | NM_002240: | NM_002240:                                                                 |
| 3763   | KCNJ6  | potassium inwardly-rectifying channel, subfamily J, member 6         | 0.15  | TACCGGCTATCACAGATAAA   | NM_002240: | NM_002240:                                                                 |
| 3764   | KCNJ8  | potassium inwardly-rectifying channel, subfamily J, member 8         | 1.05  | CCAGATCGGTGTGTTACTAAT  | NM_004982: | NM_004982:                                                                 |
| 3764   | KCNJ8  | potassium inwardly-rectifying channel, subfamily J, member 8         | -2.22 | AAGGTGAAATTTAGACTCCA   | NM_004982: | NM_004982:                                                                 |
| 3765   | KCNJ9  | potassium inwardly-rectifying channel, subfamily J, member 9         | -2.86 | CAGGCCGACAGAGAGATGAA   | NM_004983: | NM_004983:                                                                 |
| 3765   | KCNJ9  | potassium inwardly-rectifying channel, subfamily J, member 9         | 1.53  | AGGGATAATTCAACTGACAA   | NM_004983: | NM_004983:                                                                 |
| 3775   | KCNK1  | potassium channel, subfamily K, member 1                             | -1.28 | TAGGTAACCAATTAATATGTA  | NM_002245: | NM_002245:                                                                 |
| 3775   | KCNK1  | potassium channel, subfamily K, member 1                             | 0.32  | TAGCTGATGGCTAAATAGCAA  | NM_002245: | NM_002245:                                                                 |

|        |          |                                                                                 |        |                        |               |                                          |
|--------|----------|---------------------------------------------------------------------------------|--------|------------------------|---------------|------------------------------------------|
| 54207  | KCNK10   | potassium channel, subfamily K, member 10                                       | -0.09  | CTGGAATTTGTTGGAAGCAGA  | NM_021161:    | NM_021161.NM_138318.NM_138317:           |
| 54207  | KCNK10   | potassium channel, subfamily K, member 10                                       | 1.16   | CAGCGTGGAGATCCACGATAA  | NM_021161:    | NM_021161.NM_138318.NM_138317:           |
| 56660  | KCNK12   | potassium channel, subfamily K, member 12                                       | 0.67   | CTGGCGGTTCTTAAATCTTTA  | NM_022055:    | NM_022055:                               |
| 56660  | KCNK12   | potassium channel, subfamily K, member 12                                       | 0.06   | CGCGCTGGGCATCATGAACAA  | NM_022055:    | NM_022055:                               |
| 56659  | KCNK13   | potassium channel, subfamily K, member 13                                       | 0.06   | TGCAAGATGATGACTATTTA   | NM_022054:    | NM_022054:                               |
| 56659  | KCNK13   | potassium channel, subfamily K, member 13                                       | 0.40   | TAACATAAGAACATAGCTTAA  | NM_022054:    | NM_022054:                               |
| 60598  | KCNK15   | potassium channel, subfamily K, member 15                                       | 0.67   | AACGGACTCCGGCAAGGTCTT  | NM_022358:    | NM_022358:                               |
| 60598  | KCNK15   | potassium channel, subfamily K, member 15                                       | -0.06  | AACTTCGAGGGCTGGACCTTC  | NM_022358:    | NM_022358:                               |
| 83795  | KCNK16   | potassium channel, subfamily K, member 16                                       | -0.01  | AATCTGGCCGGCATTGAAAGA  | NM_032115:    | NM_032115:                               |
| 83795  | KCNK16   | potassium channel, subfamily K, member 16                                       | -1.52  | AAGGTGAGGCTTCTGTGTCT   | NM_032115:    | NM_032115:                               |
| 89822  | KCNK17   | potassium channel, subfamily K, member 17                                       | 0.53   | CTGGGTGACGCTATATGATTA  | NM_031460:    | NM_031460:                               |
| 89822  | KCNK17   | potassium channel, subfamily K, member 17                                       | -13.27 | CAGCTCAAGGAAGACTTCAA   | NM_031460:    | NM_031460:                               |
| 3776   | KCNK2    | potassium channel, subfamily K, member 2                                        | 0.68   | AGCCTAGATATGGACCATTTA  | NM_014217:    | NM_014217.NM_001017425:                  |
| 3776   | KCNK2    | potassium channel, subfamily K, member 2                                        | 1.65   | TGCGATCATCTCAACAATGAT  | NM_014217:    | NM_001017424.NM_014217.NM_001017425:     |
| 3777   | KCNK3    | potassium channel, subfamily K, member 3                                        | 0.68   | CTGATAATACCCACTCTTAA   | NM_002246:    | NM_002246:                               |
| 3777   | KCNK3    | potassium channel, subfamily K, member 3                                        | 0.11   | CACCATAATGTGATATATA    | NM_002246:    | NM_002246:                               |
| 50801  | KCNK4    | potassium channel, subfamily K, member 4                                        | 0.42   | CGAGTGGAAATTTGAGCTTAA  | NM_016611:    | NM_016611:                               |
| 50801  | KCNK4    | potassium channel, subfamily K, member 4                                        | -0.34  | AAGAGGCTGACGTGAATTA    | NM_016611:    | NM_016611:                               |
| 8645   | KCNK5    | potassium channel, subfamily K, member 5                                        | 1.58   | AACGATGCAAAATGTAATTA   | NM_003740:    | NM_003740:                               |
| 8645   | KCNK5    | potassium channel, subfamily K, member 5                                        | -0.53  | TCCCAAGGATTTGGGAGATCTA | NM_003740:    | NM_003740:                               |
| 9424   | KCNK6    | potassium channel, subfamily K, member 6                                        | -1.45  | ATCATATAATACAACTTCAA   | NM_004823:    | NM_004823:                               |
| 9424   | KCNK6    | potassium channel, subfamily K, member 6                                        | -4.62  | CTGGTTGAGCTCAAAATCCCAA | NM_004823:    | NM_004823:                               |
| 10089  | KCNK7    | potassium channel, subfamily K, member 7                                        | -0.10  | GAGGACCAAGGTGGCATCTTA  | NM_005714:    | NM_005714.NM_033347.NM_033348.NM_033455: |
| 10089  | KCNK7    | potassium channel, subfamily K, member 7                                        | -1.52  | CTGGACTAGGACTCCCAATAAA | NM_005714:    | NM_005714.NM_033456:                     |
| 51305  | KCNK9    | potassium channel, subfamily K, member 9                                        | -5.18  | CCGCAACAGCATGGCTATTCA  | NM_016601:    | NM_016601:                               |
| 51305  | KCNK9    | potassium channel, subfamily K, member 9                                        | -0.31  | CCCTCAGGTTCTTGACCATGAA | NM_016601:    | NM_016601:                               |
| 3778   | KCNMA1   | potassium large conductance calcium-activated channel, subfamily M              | 1.30   | TAGGCAGAGCAAGTTTATTTA  | NM_002247:    | NM_002247:                               |
| 3778   | KCNMA1   | potassium large conductance calcium-activated channel, subfamily M              | -0.14  | ACGGGATGTTACGCTCAACCAT | NM_002247:    | NM_001014797.NM_002247:                  |
| 3779   | KCNMB1   | potassium large conductance calcium-activated channel, subfamily M              | -0.60  | TAGGATATAAAGTGCCATATA  | NM_004137:    | NM_004137:                               |
| 3779   | KCNMB1   | potassium large conductance calcium-activated channel, subfamily M              | 0.31   | CACATTTACAGTATTACTATT  | NM_004137:    | NM_004137:                               |
| 10242  | KCNMB2   | potassium large conductance calcium-activated channel, subfamily M              | 0.97   | TTCATTTAATATCAATATCAA  | NM_005832:    | NM_005832.NM_181361:                     |
| 10242  | KCNMB2   | potassium large conductance calcium-activated channel, subfamily M              | 0.29   | AAGATGCTACTGTTGGTAAA   | NM_005832:    | NM_005832.NM_181361:                     |
| 27094  | KCNMB3   | potassium large conductance calcium-activated channel, subfamily M              | -1.43  | AACAAGTTCCGTAACACTTAT  | NM_014407:    | NM_014407.NM_171830:                     |
| 27094  | KCNMB3   | potassium large conductance calcium-activated channel, subfamily M              | -1.42  | TAAGACGGTGGCCAAATTTAA  | NM_014407:    | NM_171828.NM_014407.NM_171829.NM_171830: |
| 27345  | KCNMB4   | potassium large conductance calcium-activated channel, subfamily M              | -0.97  | ACCCTCAGTTTCCCATTTAA   | NM_014505:    | NM_014505:                               |
| 27345  | KCNMB4   | potassium large conductance calcium-activated channel, subfamily M              | -3.99  | CTGGAAGACTTGGAAACCTCAA | NM_014505:    | NM_014505:                               |
| 3780   | KCNN1    | potassium intermediate/small conductance calcium-activated channel, subfamily M | -2.45  | CGCGCTAGCCTAGAAATCCTA  | NM_002248:    | NM_002248:                               |
| 3780   | KCNN1    | potassium intermediate/small conductance calcium-activated channel, subfamily M | -2.29  | ACCGCTATGTACGACCTGTTA  | NM_002248:    | NM_002248:                               |
| 3781   | KCNN2    | potassium intermediate/small conductance calcium-activated channel, subfamily M | -0.18  | TCCTGGAAACCTGAACACTAA  | NM_021614:    | NM_170775.NM_021614:                     |
| 3781   | KCNN2    | potassium intermediate/small conductance calcium-activated channel, subfamily M | -5.44  | AAGAGGATGTTACCCCTGGAA  | NM_021614:    | NM_170775.NM_021614:                     |
| 3782   | KCNN3    | potassium intermediate/small conductance calcium-activated channel, subfamily M | 1.33   | CCGAGCTAATTAACCTAATCA  | NM_002249:    | NM_170782.NM_002249:                     |
| 3782   | KCNN3    | potassium intermediate/small conductance calcium-activated channel, subfamily M | 0.69   | AAGAGAGCCGAGCTAATTA    | NM_002249:    | NM_170782.NM_002249:                     |
| 3783   | KCNN4    | potassium intermediate/small conductance calcium-activated channel, subfamily M | 2.02   | ATCTTTGTAATAAATGTTAA   | NM_002250:    | NM_002250:                               |
| 3783   | KCNN4    | potassium intermediate/small conductance calcium-activated channel, subfamily M | 0.54   | TGGATATCCAGTATACCAAAA  | NM_002250:    | NM_002250:                               |
| 3784   | KCNQ1    | potassium voltage-gated channel, KQT-like subfamily, member 1                   | -0.10  | ACGGCTATGACGATCTGTGTA  | NM_000218:    | NM_181798.NM_000218.NM_181797:           |
| 3784   | KCNQ1    | potassium voltage-gated channel, KQT-like subfamily, member 1                   | -0.67  | CAAGAAGCTGTGGTGGTAAA   | NM_000218:    | NM_181798.NM_000218.NM_181797:           |
| 3785   | KCNQ2    | potassium voltage-gated channel, KQT-like subfamily, member 2                   | -1.54  | CCCATGTGACAAACCCCTCAA  | NM_004518:    | NM_004518:                               |
| 3785   | KCNQ2    | potassium voltage-gated channel, KQT-like subfamily, member 2                   | -2.11  | AACGGTCAACCGTGCCCATGTA | NM_004518:    | NM_172109.NM_004518.NM_172106.NM_172108: |
| 3786   | KCNQ3    | potassium voltage-gated channel, KQT-like subfamily, member 3                   | -8.77  | AACAGGTATTCGATTTGAAA   | NM_004519:    | NM_172107:                               |
| 3786   | KCNQ3    | potassium voltage-gated channel, KQT-like subfamily, member 3                   | -3.48  | CTCGACGCTTTCCAGGATA    | NM_004519:    | NM_004519:                               |
| 9132   | KCNQ4    | potassium voltage-gated channel, KQT-like subfamily, member 4                   | -0.10  | CGCCTCCATCAGGATTTCTCAA | NM_004700:    | NM_004700:                               |
| 9132   | KCNQ4    | potassium voltage-gated channel, KQT-like subfamily, member 4                   | -0.80  | CGGGCATCTGTGAGACTCAAA  | NM_004700:    | NM_172163.NM_004700:                     |
| 56479  | KCNQ5    | potassium voltage-gated channel, KQT-like subfamily, member 5                   | 0.31   | TCCAAGGTGCATCGACATTA   | NM_019842:    | NM_019842:                               |
| 56479  | KCNQ5    | potassium voltage-gated channel, KQT-like subfamily, member 5                   | 0.11   | AAGGCCAATCAGATCAGATA   | NM_019842:    | NM_019842:                               |
| 3787   | KCNS1    | potassium voltage-gated channel, delayed-rectifier, subfamily S, mem            | -0.93  | CACCTTATGGCTTTCGAGAA   | NM_002251:    | NM_002251:                               |
| 3787   | KCNS1    | potassium voltage-gated channel, delayed-rectifier, subfamily S, mem            | -0.45  | ACCCGTTGGAAGAGTCTTAAA  | NM_002251:    | NM_002251:                               |
| 3788   | KCNS2    | potassium voltage-gated channel, delayed-rectifier, subfamily S, mem            | -0.03  | AGGGAATTTATGCCCAATAAA  | NM_020697:    | NM_020697:                               |
| 3788   | KCNS2    | potassium voltage-gated channel, delayed-rectifier, subfamily S, mem            | 0.49   | CACCAAGTGAACCTAGTTTAA  | NM_020697:    | NM_020697:                               |
| 3790   | KCNS3    | potassium voltage-gated channel, delayed-rectifier, subfamily S, mem            | 1.97   | TCACATGAGCTAACCCTTAAA  | NM_002252:    | NM_002252:                               |
| 3790   | KCNS3    | potassium voltage-gated channel, delayed-rectifier, subfamily S, mem            | 0.24   | CCCGGTCACCTTGGCGGAAA   | NM_002252:    | NM_002252:                               |
| 57582  | KCNT1    | potassium channel, subfamily T, member 1                                        | 0.77   | ACGAGGACGTAGCAAAATTTA  | XM_029962:    | NM_020822:                               |
| 57582  | KCNT1    | potassium channel, subfamily T, member 1                                        | 1.43   | CAGGTCATCGTGCCATAATA   | XM_029962:    | NM_020822:                               |
| 343450 | KCNT2    | potassium channel, subfamily T, member 2                                        | 0.06   | CACATAGAGATTAAACCAAAA  | NM_198503:    | NM_198503:                               |
| 343450 | KCNT2    | potassium channel, subfamily T, member 2                                        | 0.05   | CAGGTTACAGATTTGAATCTA  | NM_198503:    | NM_198503:                               |
| 27012  | KCNV1    | potassium channel, subfamily V, member 1                                        | 0.07   | CTGTATCCCATTTACTATA    | NM_014379:    | NM_014379:                               |
| 27012  | KCNV1    | potassium channel, subfamily V, member 1                                        | -2.53  | CTGACACATTTGAGTGTCCAA  | NM_014379:    | NM_014379:                               |
| 169522 | KCNV2    | potassium channel, subfamily V, member 2                                        | -0.84  | CTGGACAGAGGGCAACTATA   | NM_133497:    | NM_133497:                               |
| 169522 | KCNV2    | potassium channel, subfamily V, member 2                                        | -0.33  | TACGAGGAGCAGACAGCGAA   | NM_133497:    | NM_133497:                               |
| 10945  | KDEL1    | KDEL (Lys-Asp-Glu-Leu) endoplasmic reticulum protein retention rece             | -0.99  | CACGTGTATGAAGGTGGTCTA  | NM_006801:    | NM_006801:                               |
| 10945  | KDEL1    | KDEL (Lys-Asp-Glu-Leu) endoplasmic reticulum protein retention rece             | 0.38   | CCACTGGTGGCCAAACACTAA  | NM_006801:    | NM_006801:                               |
| 11014  | KDEL2    | KDEL (Lys-Asp-Glu-Leu) endoplasmic reticulum protein retention rece             | 0.72   | AAGAAACTTAATGCTGTATTA  | NM_006854:    | NM_006854:                               |
| 11014  | KDEL2    | KDEL (Lys-Asp-Glu-Leu) endoplasmic reticulum protein retention rece             | 1.00   | CCTGATCTACCTGAAATTTAA  | NM_006854:    | NM_006854:                               |
| 11015  | KDEL3    | KDEL (Lys-Asp-Glu-Leu) endoplasmic reticulum protein retention rece             | 0.00   | TACCTTAATACCAATAACCTA  | NM_006855:    | NM_006855:                               |
| 11015  | KDEL3    | KDEL (Lys-Asp-Glu-Leu) endoplasmic reticulum protein retention rece             | -0.07  | TCCCAACTAAAGCCAGTTAA   | NM_006855:    | NM_006855:                               |
| 3791   | KDR      | kinase insert domain receptor (a type III receptor tyrosine kinase)             | 0.34   | AACGCTGACATGTACGGTCTA  | NM_002253:    | NM_002253:                               |
| 3791   | KDR      | kinase insert domain receptor (a type III receptor tyrosine kinase)             | 0.04   | AAGCTAATACAACCTCTTCAA  | NM_002253:    | NM_002253:                               |
| 3792   | KEL      | Kell blood group, metalloendopeptidase                                          | -1.28  | CAGCACAGAAATCGACCAA    | NM_000420:    | NM_000420:                               |
| 3792   | KEL      | Kell blood group, metalloendopeptidase                                          | 1.58   | CCCACAGAATACAACGATA    | NM_000420:    | NM_000420:                               |
| 3795   | KHK      | (keto)hex ketohexokinase (fructokinase)                                         | -0.02  | TAGCCGACCATCCTACTATA   | NM_000221:    | NM_000221:                               |
| 3795   | KHK      | (keto)hex ketohexokinase (fructokinase)                                         | 0.21   | TAGGGTGGGTAAAGCCCTATA  | NM_000221:    | NM_000221.NM_006488:                     |
| 8570   | KHSRP    | KH-type splicing regulatory protein (FUSE binding protein 2)                    | -0.05  | CAAGGAGGATTTGAAACTGAA  | NM_003685:    | NM_003685:                               |
| 8570   | KHSRP    | KH-type splicing regulatory protein (FUSE binding protein 2)                    | -7.25  | CTGGAGTGAAGATGATCTTAA  | NM_003685:    | NM_003685:                               |
| 9768   | KIAA0101 | KIAA0101                                                                        | -2.10  | ACCCGTTATTTAGAGATGTA   | NM_014736:    | NM_014736.NM_001029989:                  |
| 9768   | KIAA0101 | KIAA0101                                                                        | -0.10  | ACGGTTGATAATGCCCTACA   | NM_014736:    | NM_014736.NM_001029989:                  |
| 23306  | KIAA0286 | KIAA0286 protein                                                                | 1.03   | TGCCCTCATATTAATATATA   | M55632:       | NM_015257:                               |
| 9870   | KIAA0317 | (KI KIAA0317                                                                    | -0.79  | TGGCTGGCCAGTCAAGTGAA   | NM_014821:    | NM_014821:                               |
| 9870   | KIAA0317 | (KI KIAA0317                                                                    | -0.17  | AAGCACTATTGTATACAACA   | NM_014821:    | NM_014821:                               |
| 9673   | KIAA0446 | KIAA0446 gene product                                                           | -4.11  | CCGGAAGTTTGTAGCTGACTA  | NM_014655:    | NM_014655:                               |
| 9673   | KIAA0446 | KIAA0446 gene product                                                           | 0.03   | CACCATGGAGGACAAACGCAA  | NM_014655:    | NM_014655:                               |
| 23277  | KIAA0664 | KIAA0664                                                                        | -1.90  | CTGGCCCAAGCATTCTCAA    | NM_015229:    | NM_015229:                               |
| 23277  | KIAA0664 | KIAA0664                                                                        | -0.02  | AAGGGCCATTTCAAGGTGCA   | NM_015229:    | NM_015229:                               |
| 23307  | KIAA0674 | (KI KIAA0674                                                                    | -0.32  | CCGGAACAACTGGAACCTCAA  | XM_376903:    | XM_376903:                               |
| 23307  | KIAA0674 | (KI KIAA0674                                                                    | 0.18   | CCCGCAACATAACACTGAAA   | XM_376903:    | XM_376903:                               |
| 9914   | KIAA0703 | KIAA0703 gene product                                                           | -0.16  | CCGAGAGTTGGCGTGAAGGAA  | NM_014861:    | NM_014861:                               |
| 9914   | KIAA0703 | KIAA0703 gene product                                                           | 1.70   | ATGACTTAAGTGATATTTAA   | NM_014861:    | NM_014861:                               |
| 23255  | KIAA0802 | (KI KIAA0802                                                                    | 0.22   | ACCAAGACTTGTAGTGATTA   | NM_001010844: | NM_015210:                               |

|        |                       |                                                                         |        |                         |            |                                   |
|--------|-----------------------|-------------------------------------------------------------------------|--------|-------------------------|------------|-----------------------------------|
| 23382  | KIAA0828              | KIAA0828 protein                                                        | -0.08  | CAGGTTCTAAACTCTATAT     | NM_015328: | NM_015328:                        |
| 23382  | KIAA0828              | KIAA0828 protein                                                        | 0.39   | AGGCAACACAGCAAATTATA    | NM_015328: | NM_015328:                        |
| 51603  | KIAA0859              | KIAA0859                                                                | 1.20   | CACGATGTCTGTGAGATAT     | NM_015935: | NM_015935:NM_001007239:NM_014955: |
| 51603  | KIAA0859              | KIAA0859                                                                | 0.32   | CGGCCTTGCTACGATGTCATA   | NM_015935: | NM_015935:NM_001007239:NM_014955: |
| 23329  | KIAA0984              | KIAA0984 protein                                                        | 0.07   | ACGCATGACCACAGATATCAA   | XM_037557: | XM_037557:                        |
| 23329  | KIAA0984              | KIAA0984 protein                                                        | -0.14  | AAGAGTTGATACCAAGTTGAA   | XM_037557: | XM_037557:                        |
| 23387  | KIAA0999              | KIAA0999 protein                                                        | -0.01  | AACATTGTTCATCGTGATTTA   | NM_025164: | NM_025164:                        |
| 23387  | KIAA0999              | KIAA0999 protein                                                        | 0.40   | CGGGGAAGTTCGAAATATGAA   | NM_025164: | NM_025164:                        |
| 84162  | KIAA1109              | KIAA1109                                                                | -1.38  | CACCTCTTAAGCGAATGGAAA   | XM_371706: | XM_371706:                        |
| 84162  | KIAA1109              | KIAA1109                                                                | 0.22   | CTCGAAGAGATTCACCTTTGAA  | XM_371706: | XM_371706:                        |
| 54462  | KIAA1128              | KIAA1128                                                                | -2.49  | CCGTATATTTATGAAGCATAA   | NM_018999: | NM_018999:                        |
| 54462  | KIAA1128              | KIAA1128                                                                | -0.73  | ACCGTATATTTATGAAGCATAA  | NM_018999: | NM_018999:                        |
| 57462  | KIAA1161 (KI KIAA1161 |                                                                         | -4.08  | CACCTCTATACCACCCATTAA   | NM_020702: | NM_020702:                        |
| 57462  | KIAA1161 (KI KIAA1161 |                                                                         | -4.59  | CAGGCCAGACTTCGTGCCCTTA  | NM_020702: | NM_020702:                        |
| 57495  | KIAA1239              | KIAA1239 protein                                                        | -7.27  | ATCCATGACATCTGTGAATTA   | NM_139209: | XM_049078:                        |
| 55632  | KIAA1333              | KIAA1333                                                                | 1.42   | TAGATTAATCTGTATGGTCAA   | NM_017769: | NM_017769:                        |
| 55632  | KIAA1333              | KIAA1333                                                                | -0.75  | AAGGAATATTATAGCCACTTA   | NM_017769: | NM_017769:                        |
| 57544  | KIAA1344 (KI KIAA1344 |                                                                         | -0.39  | CGGGCAGATAACATAGATCAT   | XM_051699: | NM_020784:                        |
| 57544  | KIAA1344 (KI KIAA1344 |                                                                         | 1.59   | AACAATGAGAGTGAACCTCAA   | XM_051699: | NM_020784:                        |
| 57596  | KIAA1446              | likely ortholog of rat brain-enriched guanylate kinase-associated prote | 0.01   | CGGGCGGACCATTGTCAACGCTA | NM_020836: | NM_020836:                        |
| 57596  | KIAA1446              | likely ortholog of rat brain-enriched guanylate kinase-associated prote | -0.16  | CTGCAGCTTCTCTGAACGCTA   | NM_020836: | NM_020836:                        |
| 57604  | KIAA1456              | KIAA1456 protein                                                        | 1.27   | TCCGTCGAGAATAGTCTAAT    | NM_020844: | NM_020844:                        |
| 57604  | KIAA1456              | KIAA1456 protein                                                        | 0.78   | CTGTGAGTAACTGTATCACTTA  | NM_020844: | NM_020844:                        |
| 57613  | KIAA1467              | KIAA1467                                                                | 0.71   | TTGGTTTGTATGAAATTTGA    | XM_370682: | NM_020853:                        |
| 57613  | KIAA1467              | KIAA1467                                                                | 0.44   | CATGGTGTATTTGCAAACTAA   | XM_370682: | NM_020853:                        |
| 57650  | KIAA1524              | KIAA1524                                                                | -0.48  | CAGAAGAGCGCAGAGTGATA    | NM_020890: | NM_020890:                        |
| 57650  | KIAA1524              | KIAA1524                                                                | 0.40   | CGGCACAACTTTCTGTGTTAA   | NM_020890: | NM_020890:                        |
| 57661  | KIAA1542              | CTD-binding SR-like protein rA9                                         | -1.24  | CCGGATCAATATTCCTGGAAA   | XM_290536: | NM_020901:                        |
| 57661  | KIAA1542              | CTD-binding SR-like protein rA9                                         | 0.08   | CGGTCCTTGATAAATCTGTA    | XM_290536: | NM_020901:                        |
| 57687  | KIAA1576              | KIAA1576 protein                                                        | 1.85   | CAGGAGCTCATTTGATTCATA   | NM_020927: | NM_020927:                        |
| 57687  | KIAA1576              | KIAA1576 protein                                                        | 0.81   | TACCAATTCTGTAATTTCAA    | NM_020927: | NM_020927:                        |
| 57724  | KIAA1632              | KIAA1632                                                                | -0.94  | AAGCAGTATGTGAATCGTGAA   | NM_020964: | NM_020964:                        |
| 57724  | KIAA1632              | KIAA1632                                                                | -5.20  | TAGGATCTAGGTTCTCCAGAA   | NM_020964: | NM_020964:                        |
| 57729  | KIAA1639              | KIAA1639 protein                                                        | -2.84  | CCGCACGGCATGTGTCAGCAA   | NM_290923: | XM_290923:                        |
| 57729  | KIAA1639              | KIAA1639 protein                                                        | -0.53  | CACAAGACCTTCGCATTCCA    | XM_290923: | XM_290923:                        |
| 80789  | KIAA1698              | KIAA1698                                                                | 0.26   | CACCGGTACATTAATGACAT    | NM_030628: | NM_030628:                        |
| 80789  | KIAA1698              | KIAA1698                                                                | -2.52  | CTGGTAATATGCATGAAGTA    | NM_030628: | NM_030628:                        |
| 80000  | KIAA1772              | KIAA1772                                                                | -0.03  | CACCAATCCCTATTACAAA     | NM_024935: | NM_024935:                        |
| 80000  | KIAA1772              | KIAA1772                                                                | -0.49  | AACGGGAAACTGTATCCATA    | NM_024935: | NM_024935:                        |
| 84461  | KIAA1787              | KIAA1787 protein                                                        | 0.36   | CAGGTCAACCTCAGAGTGAA    | NM_004489: | NM_032442:NM_001005408:           |
| 84461  | KIAA1787              | KIAA1787 protein                                                        | -1.37  | CTGCGAGAAGTTGGGCCCAA    | NM_004489: | NM_032442:NM_001005408:           |
| 84451  | KIAA1804              | mixed lineage kinase 4                                                  | -1.60  | ACGGACCATGTCTGATGGAAA   | NM_032435: | NM_032435:                        |
| 84451  | KIAA1804              | mixed lineage kinase 4                                                  | 1.27   | CGGAACTTAAACATTTGATA    | NM_032435: | NM_032435:                        |
| 84439  | KIAA1822              | KIAA1822                                                                | -0.22  | GCGCATCGACGTGGACCGTAA   | NM_032425: | NM_032425:                        |
| 84439  | KIAA1822              | KIAA1822                                                                | 0.21   | CAGGAACACCTTGAATGATA    | NM_032425: | NM_032425:                        |
| 124454 | KIAA1970              | KIAA1970 protein                                                        | 0.27   | CTGTGAGATAGTAAACGTTTA   | NM_133451: | NM_133451:                        |
| 124454 | KIAA1970              | KIAA1970 protein                                                        | 1.02   | AACCAGCCTCATTTAAGTTAA   | NM_133451: | NM_133451:                        |
| 79834  | KIAA2002              | KIAA2002 protein                                                        | -1.77  | CAGCTTGAGAACATCATATA    | XM_370878: | XM_370878:                        |
| 79834  | KIAA2002              | KIAA2002 protein                                                        | 1.52   | CCACTTAACAATAAATGAA     | XM_370878: | XM_370878:                        |
| 158358 | KIAA2026 (KI KIAA2026 |                                                                         | -6.38  | TCCGGAAGCAAGCCGATATA    | XM_088551: | NM_001017969:                     |
| 158358 | KIAA2026 (KI KIAA2026 |                                                                         | -0.41  | CACGTTCTGTATCTATTCTA    | XM_088551: | NM_001017969:                     |
| 57498  | KIDINS220             | kinase D-interacting substance of 220 kDa                               | 1.11   | CAGCGAGACTCCTTATAATA    | AB033076:  | NM_020738:                        |
| 57498  | KIDINS220             | kinase D-interacting substance of 220 kDa                               | 1.01   | TCCGAGATGCGCTATTACTA    | AB033076:  | NM_020738:                        |
| 3832   | KIF11                 | kinesin family member 11                                                | -11.07 | ACGGAGGAGATGAGACGTTTA   | NM_004523: | NM_004523:                        |
| 3832   | KIF11                 | kinesin family member 11                                                | -2.50  | GCCGATAGATAGAGATCAA     | NM_004523: | NM_004523:                        |
| 113220 | KIF12                 | kinesin family member 12                                                | -2.00  | AAGAGAGGCATCAGCTCCAAA   | NM_138424: | NM_138424:                        |
| 113220 | KIF12                 | kinesin family member 12                                                | -0.35  | ACAGGAGTTCATGCTAGAGAA   | NM_138424: | NM_138424:                        |
| 63971  | KIF13A                | kinesin family member 13A                                               | -1.37  | CTGGCGGATGCGGAAAGAGTA   | NM_022113: | NM_022113:                        |
| 63971  | KIF13A                | kinesin family member 13A                                               | 0.85   | CCGCAACAACCTTGGTAGGAAA  | NM_022113: | NM_022113:                        |
| 23303  | KIF13B                | kinesin family member 13B                                               | 0.66   | ATGTCTTAACTAAACCATAA    | NM_015254: | NM_015254:                        |
| 23303  | KIF13B                | kinesin family member 13B                                               | 0.35   | CCCCTAATGCTTAACTATA     | NM_015254: | NM_015254:                        |
| 9928   | KIF14                 | kinesin family member 14                                                | -1.63  | ATGTTAATCGTCTCCAGAA     | XM_375825: | NM_014875:                        |
| 9928   | KIF14                 | kinesin family member 14                                                | 0.66   | CAGACATGATATATCAGATA    | XM_375825: | NM_014875:                        |
| 56992  | KIF15                 | kinesin family member 15                                                | 0.52   | ACGCAATAACAATAATCAT     | NM_020242: | NM_020242:                        |
| 56992  | KIF15                 | kinesin family member 15                                                | -0.52  | TTGAGTTGACCAACTTTCAA    | NM_020242: | NM_020242:                        |
| 57576  | KIF17                 | kinesin family member 17                                                | -3.06  | CAGCACTACTTCCGATCTAA    | NM_020816: | NM_020816:                        |
| 57576  | KIF17                 | kinesin family member 17                                                | -7.12  | CAGGAAGAGCCTCACACATCA   | NM_020816: | NM_020816:                        |
| 81930  | KIF18A                | kinesin family member 18A                                               | -3.57  | CAGGAGGACTTGGACTCTACA   | NM_031217: | NM_031217:                        |
| 81930  | KIF18A                | kinesin family member 18A                                               | -3.71  | CAGGTGGAACATACTGGTTA    | NM_031217: | NM_031217:                        |
| 124602 | KIF19                 | kinesin family member 19                                                | -5.79  | CGGGTCAAGAACATCTTGCA    | NM_153209: | NM_153209:                        |
| 124602 | KIF19                 | kinesin family member 19                                                | -6.31  | CGGGGAAGACTCCTACCTGTT   | NM_153209: | NM_153209:                        |
| 547    | KIF1A                 | kinesin family member 1A                                                | -1.19  | CAACTCGGAAATTAACATATA   | NM_004321: | NM_004321:                        |
| 547    | KIF1A                 | kinesin family member 1A                                                | -4.80  | CAGCCGATGCTTTCCAAGAA    | NM_004321: | NM_004321:                        |
| 23095  | KIF1B                 | kinesin family member 1B                                                | -5.39  | CCGGTCTATTCAACCAGCA     | NM_015074: | NM_015074:                        |
| 23095  | KIF1B                 | kinesin family member 1B                                                | 0.88   | CTGGTGAATCTCCAAATTTAT   | NM_015074: | NM_015074:                        |
| 10749  | KIF1C                 | kinesin family member 1C                                                | -1.33  | CTGGAGAATCAGTACCCGAAA   | NM_006612: | NM_006612:                        |
| 10749  | KIF1C                 | kinesin family member 1C                                                | -0.71  | CACGGTCCAGACCATTTGCAA   | NM_006612: | NM_006612:                        |
| 3796   | KIF2                  | kinesin heavy chain member 2                                            | 1.54   | ACCATATAACATGTGATTATA   | NM_004520: | NM_004520:                        |
| 3796   | KIF2                  | kinesin heavy chain member 2                                            | -0.88  | CAGCAAGCAAAATCAACCAGAA  | NM_004520: | NM_004520:                        |
| 10112  | KIF20A                | kinesin family member 20A                                               | -1.29  | AACGAAGCTGTTATGACCTA    | NM_005733: | NM_005733:                        |
| 10112  | KIF20A                | kinesin family member 20A                                               | -0.01  | CTGCTTATGACCTATTAGAA    | NM_005733: | NM_005733:                        |
| 55605  | KIF21A                | kinesin family member 21A                                               | -1.88  | AAGTTTCAGTCTACAGGAAA    | NM_017641: | NM_017641:                        |
| 55605  | KIF21A                | kinesin family member 21A                                               | -1.75  | AAGCTTTGGTGAAGTGAAA     | NM_017641: | NM_017641:                        |
| 23046  | KIF21B                | kinesin family member 21B                                               | -0.64  | CGGGTAAAGTTGGGAATTA     | XM_371332: | NM_017596:XM_371332:              |
| 23046  | KIF21B                | kinesin family member 21B                                               | -1.82  | TGCGGAGTCTCGCCATAAA     | XM_371332: | NM_017596:XM_371332:              |
| 3835   | KIF22                 | kinesin family member 22                                                | 0.52   | ATCCACATCCTGAAGATAAA    | NM_007317: | NM_007317:                        |
| 3835   | KIF22                 | kinesin family member 22                                                | 0.46   | CAGGACATCTATGCAAGTTCA   | NM_007317: | NM_007317:                        |
| 9493   | KIF23                 | kinesin family member 23                                                | -1.69  | AAGGCTGAAGATTATGAAGAA   | NM_004856: | NM_004856:NM_138555:              |
| 9493   | KIF23                 | kinesin family member 23                                                | 1.01   | CAGAAGTTGAAGTGAATCTA    | NM_004856: | NM_004856:NM_138555:              |
| 3834   | KIF25                 | kinesin family member 25                                                | 1.47   | CGGATTTGAATGATTAAACAA   | NM_005355: | NM_030615:NM_005355:              |
| 3834   | KIF25                 | kinesin family member 25                                                | -0.07  | CACCCTCTGATTGATAAGACA   | NM_005355: | NM_030615:NM_005355:              |
| 26153  | KIF26A                | kinesin family member 26A                                               | 0.00   | GCCGTGGGAATTTGAAGACAA   | XM_050278: | XM_050278:                        |
| 26153  | KIF26A                | kinesin family member 26A                                               | 1.20   | CAGCATCAATGATGAGTTTGA   | XM_050278: | XM_050278:                        |
| 55083  | KIF26B                | kinesin family member 26B                                               | -4.06  | AAGCACTTTGAGGAACCTTAA   | XM_371354: | XM_371354:                        |
| 55083  | KIF26B                | kinesin family member 26B                                               | 1.76   | ATCAGTATTGCTTATGAATAA   | XM_371354: | XM_371354:                        |
| 55582  | KIF27                 | kinesin family member 27                                                | -0.70  | AAGAAGGACCACAGCATGTTA   | NM_017576: | NM_017576:                        |
| 55582  | KIF27                 | kinesin family member 27                                                | 0.27   | TACAGTACCACCTCAATGAA    | NM_017576: | NM_017576:                        |
| 84643  | KIF2B (kinesi         | kinesin family member 2B                                                | -0.40  | CTGGTGGAGTACACCATGATA   | NM_032559: | NM_032559:                        |
| 84643  | KIF2B (kinesi         | kinesin family member 2B                                                | 0.07   | CAGAGGATGAATTTATAAA     | NM_032559: | NM_032559:                        |

|        |               |                                                               |       |                         |            |            |
|--------|---------------|---------------------------------------------------------------|-------|-------------------------|------------|------------|
| 11004  | KIF2C         | kinesin family member 2C                                      | 1.32  | CCAGTGACGACTGCAAAATAA   | NM_006845: | NM_006845: |
| 11004  | KIF2C         | kinesin family member 2C                                      | 0.18  | CACGCGTGCTTCCAAATTATT   | NM_006845: | NM_006845: |
| 11127  | KIF3A (kinesi | kinesin family member 3A                                      | 2.05  | GTGCCTTATCGTAACTGATA    | NM_007054: | NM_007054: |
| 11127  | KIF3A (kinesi | kinesin family member 3A                                      | -5.84 | CTGGTTGAGAAGACAGGCAA    | NM_007054: | NM_007054: |
| 9371   | KIF3B         | kinesin family member 3B                                      | -1.82 | AACGCTAAGGTGGTAGCCTA    | NM_004798: | NM_004798: |
| 9371   | KIF3B         | kinesin family member 3B                                      | 0.43  | CAGAGAATTCACGAACTCTA    | NM_004798: | NM_004798: |
| 3797   | KIF3C (kinesi | kinesin family member 3C                                      | 0.03  | AAGGGCCTTGATTAGGACCAA   | NM_002254: | NM_002254: |
| 3797   | KIF3C (kinesi | kinesin family member 3C                                      | 0.33  | AAAGAAAGATATAACATCTA    | NM_002254: | NM_002254: |
| 24137  | KIF4A         | kinesin family member 4A                                      | 0.43  | AAGGAACAAGCGTACTGAA     | NM_012310: | NM_012310: |
| 24137  | KIF4A         | kinesin family member 4A                                      | 0.03  | CAGGTCAGACTACTACTCTA    | NM_012310: | NM_012310: |
| 3798   | KIF5A         | kinesin family member 5A                                      | 0.11  | CTGAGTGGTGTGATCACTGA    | NM_004984: | NM_004984: |
| 3798   | KIF5A         | kinesin family member 5A                                      | 1.04  | CTGCGTTGTGAGCTTCTCAAA   | NM_004984: | NM_004984: |
| 3799   | KIF5B         | kinesin family member 5B                                      | 0.00  | AACGTTGCAAGCAGTTAGAAA   | NM_004521: | NM_004521: |
| 3799   | KIF5B         | kinesin family member 5B                                      | -0.40 | CGCAATGGAGTTATAGGAAA    | NM_004521: | NM_004521: |
| 221458 | KIF6          | kinesin family member 6                                       | 0.26  | ACGGTCCCAACTCCTCTTAA    | NM_145027: | NM_145027: |
| 221458 | KIF6          | kinesin family member 6                                       | -3.34 | AAGATTGTCAAGAACATTAA    | NM_145027: | NM_145027: |
| 374654 | KIF7          | kinesin family member 7                                       | -1.04 | TTGGCCAAGAATCATCACGAA   | NM_198525: | NM_198525: |
| 374654 | KIF7          | kinesin family member 7                                       | 1.09  | TACCCTCACTGGGATCAACAA   | NM_198525: | NM_198525: |
| 64147  | KIF9          | kinesin family member 9                                       | -4.41 | CAGGACTTGGTTTATGAGACA   | NM_182902: | NM_182902: |
| 64147  | KIF9          | kinesin family member 9                                       | 0.45  | AACAGACAGACTGGTCTTTA    | NM_182902: | NM_182902: |
| 22920  | KIFAP3        | kinesin-associated protein 3                                  | -0.58 | CAGCATGATGGACCAACTAAA   | NM_014970: | NM_014970: |
| 22920  | KIFAP3        | kinesin-associated protein 3                                  | 0.99  | CACAAGAGAGCTCAATATCA    | NM_014970: | NM_014970: |
| 3833   | KIFC1         | kinesin family member C1                                      | 0.76  | TCGGAAACACAGGCCATTAA    | NM_002263: | NM_002263: |
| 3833   | KIFC1         | kinesin family member C1                                      | 0.07  | TGGGACTTAAAGGCTCAGTTA   | NM_002263: | NM_002263: |
| 90990  | KIFC2 (kinesi | kinesin family member C2                                      | -5.78 | CAGCATGGTGAGGATCTACAA   | NM_145754: | NM_145754: |
| 90990  | KIFC2 (kinesi | kinesin family member C2                                      | -3.15 | CAGCGTCTGACATCTTCACTA   | NM_145754: | NM_145754: |
| 3801   | KIFC3         | kinesin family member C3                                      | -0.24 | TCCCTCGAAATCCTATTTAA    | NM_005550: | NM_005550: |
| 3801   | KIFC3         | kinesin family member C3                                      | 0.23  | GACCGAGTTCACCAACTGAA    | NM_005550: | NM_005550: |
| 3814   | KISS1         | KISS-1 metastasis-suppressor                                  | -9.69 | CACCCTTGGACATCAACCCA    | NM_002256: | NM_002256: |
| 3814   | KISS1         | KISS-1 metastasis-suppressor                                  | -0.39 | CCAGGTGGTGTCTGCTCACCTA  | NM_002256: | NM_002256: |
| 84634  | KISS1R        | KISS1 receptor                                                | 0.17  | CGGACCCGTGACCAACTTCTA   | NM_032551: | NM_032551: |
| 84634  | KISS1R        | KISS1 receptor                                                | -0.99 | TGGTGCAGTTTCTGTTGTAA    | NM_032551: | NM_032551: |
| 3815   | KIT           | v-kit Hardy-Zuckerman 4 feline sarcoma viral oncogene homolog | 1.03  | CACGGTTGAATGTAAGGCTTA   | NM_000222: | NM_000222: |
| 3815   | KIT           | v-kit Hardy-Zuckerman 4 feline sarcoma viral oncogene homolog | 0.23  | CTCGCACCTTCCAAAGTTAA    | NM_000222: | NM_000222: |
| 4254   | KITLG         | KIT ligand                                                    | -1.03 | CACTGAATTAATCATCTATA    | NM_000899: | NM_000899: |
| 4254   | KITLG         | KIT ligand                                                    | 1.53  | CAGAAATGTCTAAATGCTGAA   | NM_000899: | NM_000899: |
| 64837  | KLC2          | kinesin light chain 2                                         | 0.49  | CCGGCCGTTGCTTCTGTATA    | NM_022822: | NM_022822: |
| 64837  | KLC2          | kinesin light chain 2                                         | 0.15  | CAGCAGTGAGATGCTGGTAAA   | NM_022822: | NM_022822: |
| 147700 | KLC3          | kinesin light chain 3                                         | -0.79 | CAGACCCCTCTTGAATCCCA    | NM_145275: | NM_145275: |
| 147700 | KLC3          | kinesin light chain 3                                         | 0.45  | CAGACCCCTCTTGAATCCCA    | NM_145275: | NM_145275: |
| 147700 | KLC3          | kinesin light chain 3                                         | -0.94 | CCGACGAGCTGCTACCTCCAA   | NM_177417: | NM_177417: |
| 147700 | KLC3          | kinesin light chain 3                                         | 0.75  | CGGAAGAGCTGTACAAAGAAA   | NM_177417: | NM_177417: |
| 89953  | KLC4          | kinesin light chain 4                                         | -0.01 | AAGGTTGCGGACGTTGCACAA   | NM_201521: | NM_201521: |
| 89953  | KLC4          | kinesin light chain 4                                         | -8.57 | CAGCGGCTACAGCGCAGTGAA   | NM_201521: | NM_201521: |
| 7071   | KLF10         | Kruppel-like factor 10                                        | 0.98  | ATGGCTTATGTCATCAGTAAA   | NM_005655: | NM_005655: |
| 7071   | KLF10         | Kruppel-like factor 10                                        | -0.16 | CCGCTGGGGTTAGTGACTAAA   | NM_005655: | NM_005655: |
| 51621  | KLF13         | Kruppel-like factor 13                                        | 0.68  | CCCAAGAGTGGTCTCGTTTAA   | NM_015995: | NM_015995: |
| 51621  | KLF13         | Kruppel-like factor 13                                        | -0.21 | CACCTCAGGTGTCACAAAGTAAA | NM_015995: | NM_015995: |
| 83855  | KLF16         | Kruppel-like factor 16                                        | 0.41  | TCCTTGATTTAATTAATTA     | NM_031918: | NM_031918: |
| 83855  | KLF16         | Kruppel-like factor 16                                        | 0.36  | TGGCCTCATCCTGTATTTAA    | NM_031918: | NM_031918: |
| 1316   | KLF6          | Kruppel-like factor 6                                         | 0.28  | CTGCCTTAGAGCTGGAACGTTA  | NM_001300: | NM_001300: |
| 1316   | KLF6          | Kruppel-like factor 6                                         | -0.32 | TTGATGTAGGAGTCTATTA     | NM_001300: | NM_001300: |
| 3816   | KLK1          | kallikrein 1, renal/pancreas/salivary                         | 0.79  | CAGAGTGCTGTCTATGTGAA    | NM_002257: | NM_002257: |
| 3816   | KLK1          | kallikrein 1, renal/pancreas/salivary                         | 0.35  | CGCCGTGAGAGTGCTGTCTTA   | NM_002257: | NM_002257: |
| 5655   | KLK10         | kallikrein 10                                                 | -1.33 | TGGGTGGTGAAGTGTGACTAA   | NM_002776: | NM_002776: |
| 5655   | KLK10         | kallikrein 10                                                 | 0.46  | TTGATGGTATGTCATGTAA     | NM_002776: | NM_002776: |
| 11012  | KLK11         | kallikrein 11                                                 | -1.67 | CAGCTCTGGCCATATATCAA    | NM_006853: | NM_006853: |
| 11012  | KLK11         | kallikrein 11                                                 | 0.07  | ATGCTGTCACTAATAATCAA    | NM_006853: | NM_006853: |
| 43849  | KLK12         | kallikrein 12                                                 | 1.57  | TGCAATAGTCTGGAATAAATA   | NM_019598: | NM_019598: |
| 43849  | KLK12         | kallikrein 12                                                 | 1.68  | TGGGAACCTTCTGGAACCTTA   | NM_019598: | NM_019598: |
| 26085  | KLK13         | kallikrein 13                                                 | 0.49  | CTCAACAATATGTCCTATA     | NM_015596: | NM_015596: |
| 26085  | KLK13         | kallikrein 13                                                 | 1.33  | TCAGCCCATCTCAACAATATA   | NM_015596: | NM_015596: |
| 43847  | KLK14         | kallikrein 14                                                 | 0.45  | ATGGAATCATCCTAATTGTA    | NM_022046: | NM_022046: |
| 43847  | KLK14         | kallikrein 14                                                 | -0.24 | CCGAATAAATGACAATAA      | NM_022046: | NM_022046: |
| 55554  | KLK15         | kallikrein 15                                                 | -3.39 | CCGCTGACATGGAACAGAA     | NM_017509: | NM_017509: |
| 55554  | KLK15         | kallikrein 15                                                 | 0.14  | CCCGTGTGATCTTGAACAAGA   | NM_017509: | NM_017509: |
| 3817   | KLK2          | kallikrein 2, prostatic                                       | -4.77 | CTGAGGTCCCTAGAGTTCAA    | NM_005551: | NM_005551: |
| 3817   | KLK2          | kallikrein 2, prostatic                                       | 0.58  | TACTTGAATAATTGACCTGAA   | NM_005551: | NM_005551: |
| 354    | KLK3          | kallikrein 3, (prostate specific antigen)                     | 1.23  | CAGAAATAAAGAGCTGTTATA   | NM_001648: | NM_001648: |
| 354    | KLK3          | kallikrein 3, (prostate specific antigen)                     | -4.76 | CACAGCAAGGATGGAGCTGAA   | NM_001648: | NM_001648: |
| 9622   | KLK4          | kallikrein 4 (prostase, enamel matrix, prostate)              | 0.21  | CAGAAATAAAGTCTAAGAGAA   | NM_004917: | NM_004917: |
| 9622   | KLK4          | kallikrein 4 (prostase, enamel matrix, prostate)              | 0.77  | TAGATCCAGAAATAAAGTCTA   | NM_004917: | NM_004917: |
| 25818  | KLK5          | kallikrein 5                                                  | 0.01  | AACCTGGGAACAATTTCCAA    | NM_012427: | NM_012427: |
| 25818  | KLK5          | kallikrein 5                                                  | -0.67 | CAGACCGGTTGCTACACGAA    | NM_012427: | NM_012427: |
| 5653   | KLK6          | kallikrein 6 (neurosin, zyme)                                 | 0.15  | CACCATGCACTCAATAAAGAA   | NM_002774: | NM_002774: |
| 5653   | KLK6          | kallikrein 6 (neurosin, zyme)                                 | -0.70 | CTGCAGATTTCTCACCTGTAA   | NM_002774: | NM_002774: |
| 5650   | KLK7          | kallikrein 7 (chymotryptic, stratum corneum)                  | 0.32  | CACAATGATATACAAACCTA    | NM_005046: | NM_005046: |
| 5650   | KLK7          | kallikrein 7 (chymotryptic, stratum corneum)                  | -0.07 | AACCATCAACATGTTCCAAA    | NM_005046: | NM_005046: |
| 11202  | KLK8          | kallikrein 8 (neuropsin/ovasin)                               | -0.26 | TAAGCACTAGATCTCCCTTAA   | NM_007196: | NM_007196: |
| 11202  | KLK8          | kallikrein 8 (neuropsin/ovasin)                               | -1.64 | CAAGGGCTGATTCTAGGATAA   | NM_007196: | NM_007196: |
| 284366 | KLK9          | kallikrein 9                                                  | 1.07  | CCCAAGGAACCACTTACACAA   | NM_012315: | NM_012315: |
| 284366 | KLK9          | kallikrein 9                                                  | 1.68  | CACCTCCTCTTGGAAACAGCA   | NM_012315: | NM_012315: |
| 3818   | KLKB1         | kallikrein B, plasma (Fletcher factor) 1                      | 0.24  | ATGGTCTGTGCTGGCTATAA    | NM_000892: | NM_000892: |
| 3818   | KLKB1         | kallikrein B, plasma (Fletcher factor) 1                      | -1.16 | AACGTGGAATCTGGATTCTCA   | NM_000892: | NM_000892: |
| 221191 | KlkB4         | plasma kallikrein-like protein 4                              | 0.09  | CAGGAAGGACATTTGCTGTTA   | NM_003679: | NM_003679: |
| 221191 | KlkB4         | plasma kallikrein-like protein 4                              | 0.31  | ACCAAGTTGGCGTCCAGAAA    | NM_003679: | NM_003679: |
| 8564   | KMO           | kynurenine 3-monooxygenase (kynurenine 3-hydroxylase)         | -0.18 | TGGGTACACATCGAATAATA    | NM_003679: | NM_003679: |
| 8564   | KMO           | kynurenine 3-monooxygenase (kynurenine 3-hydroxylase)         | -0.39 | AAGGCTATTAATCATACTA     | NM_003679: | NM_003679: |
| 3827   | KNG1          | kininogen 1                                                   | -0.98 | ACCGGTGAATGACAGATAAT    | NM_000893: | NM_000893: |

|        |         |                                                            |        |                         |            |                                                                                                       |
|--------|---------|------------------------------------------------------------|--------|-------------------------|------------|-------------------------------------------------------------------------------------------------------|
| 3827   | KNG1    | kininogen 1                                                | 0.30   | TCCCTCTCATGCTTAATGAA    | NM_000893: | NM_000893:                                                                                            |
| 3831   | KNS2    | kinesin 2                                                  | -3.45  | CCCGATGTTGCCAAGCAGTTA   | NM_182923: | NM_005552:NM_182923:                                                                                  |
| 3831   | KNS2    | kinesin 2                                                  | 1.10   | TGGAGTTTATGAATCAGCTAA   | NM_182923: | NM_005552:NM_182923:                                                                                  |
| 3831   | KNS2    | kinesin 2                                                  | -2.61  | CCCGATGTTGCCAAGCAGTTA   | NM_182923: | NM_005552:NM_182923:                                                                                  |
| 3831   | KNS2    | kinesin 2                                                  | 1.03   | TGGAGTTTATGAATCAGCTAA   | NM_182923: | NM_005552:NM_182923:                                                                                  |
| 9735   | KNTC1   | kinetochore associated 1                                   | -1.62  | TCCCGTGGATCAGAATATCA    | NM_014708: | NM_014708:                                                                                            |
| 9735   | KNTC1   | kinetochore associated 1                                   | 0.05   | TGCTCTTAATTCGAAATTA     | NM_014708: | NM_014708:                                                                                            |
| 10403  | KNTC2   | kinetochore associated 2                                   | -9.59  | CCGAGACCACTAATGACAAA    | NM_006101: | NM_006101:                                                                                            |
| 10403  | KNTC2   | kinetochore associated 2                                   | -10.26 | TCCCTGGTGGTGTCCAGGAAA   | NM_006101: | NM_006101:                                                                                            |
| 3838   | KPNA2   | karyopherin alpha 2 (RAG cohort 1, importin alpha 1)       | -4.73  | ACGAATGGCATGGTGGTGAA    | NM_002266: | NM_002266:                                                                                            |
| 3838   | KPNA2   | karyopherin alpha 2 (RAG cohort 1, importin alpha 1)       | 0.54   | CCGGCTGGTTTATTCCGAA     | NM_002266: | NM_002266:                                                                                            |
| 23633  | KPNA6   | karyopherin alpha 6 (importin alpha 7)                     | -3.37  | AACATTCTCTTACAGTTTAA    | NM_012316: | NM_012316:                                                                                            |
| 23633  | KPNA6   | karyopherin alpha 6 (importin alpha 7)                     | -1.46  | CTGGGTGATTACATATGATA    | NM_012316: | NM_012316:                                                                                            |
| 3837   | KPNB1   | karyopherin (importin) beta 1                              | -3.14  | TGGTTATATTTGCCAAGATA    | NM_002265: | NM_002265:                                                                                            |
| 3837   | KPNB1   | karyopherin (importin) beta 1                              | -6.43  | CAAGAACTCTTTGACATCTAA   | NM_002265: | NM_002265:                                                                                            |
| 3845   | KRAS    | v-Ki-ras2 Kirsten rat sarcoma viral oncogene homolog       | 0.26   | AAGGAGAAATTAATAAGATA    | NM_004985: | NM_004985:NM_033360:                                                                                  |
| 3845   | KRAS    | v-Ki-ras2 Kirsten rat sarcoma viral oncogene homolog       | 0.34   | CTCCTAATTAATGAATGTAA    | NM_004985: | NM_004985:NM_033360:                                                                                  |
| 83999  | KREMEN1 | kringle containing transmembrane protein 1                 | -1.22  | ACCCGAGTGTTCACAGCCAA    | NM_032045: | NM_032045:                                                                                            |
| 83999  | KREMEN1 | kringle containing transmembrane protein 1                 | -0.69  | GACCTTAGGATTTGCATCAA    | NM_032045: | NM_153379:NM_032045:                                                                                  |
| 79412  | KREMEN2 | kringle containing transmembrane protein 2                 | -0.40  | CCCGGACTTCCCGCAGGATA    | NM_024507: | NM_172229:NM_024507:NM_145347:NM_145348:                                                              |
| 79412  | KREMEN2 | kringle containing transmembrane protein 2                 | -0.24  | CGCGCACAACTTCCCGGTAA    | NM_024507: | NM_172229:NM_024507:NM_145347:NM_145348:<br>NM_194454:NM_194455:NM_001013406:NM_0049<br>12:NM_194456: |
| 889    | KRIT1   | KRIT1, ankyrin repeat containing                           | 0.48   | AACAAGGAGATCTCCATTAA    | NM_004912: | NM_194454:NM_194455:NM_001013406:NM_0049<br>12:NM_194456:                                             |
| 889    | KRIT1   | KRIT1, ankyrin repeat containing                           | -4.67  | TAGGAGCTCCAGACTACTCAA   | NM_004912: | 12:NM_194456:                                                                                         |
| 3848   | KRT1    | keratin 1 (epidermolytic hyperkeratosis)                   | 0.47   | TCCACTAGAACCATAATTTA    | NM_006121: | NM_006121:                                                                                            |
| 3848   | KRT1    | keratin 1 (epidermolytic hyperkeratosis)                   | -2.54  | AACCCATAATTTAGAGCCCTA   | NM_006121: | NM_006121:                                                                                            |
| 3856   | KRT8    | keratin 8                                                  | -2.10  | CAGGGTGACCAGAAGTCCCTA   | NM_002273: | NM_002273:NM_496418:                                                                                  |
| 8844   | KSR1    | kinase suppressor of ras 1                                 | -0.65  | AAGGGCGAAGCTGGTCCGTTA   | XM_290793: | NM_014238:                                                                                            |
| 283455 | KSR2    | kinase suppressor of ras 2                                 | -2.80  | ATCCGGTGACCTCGAATCCAA   | NM_173598: | NM_173598:                                                                                            |
| 283455 | KSR2    | kinase suppressor of ras 2                                 | -0.41  | TCCGTTTGAGGGGATGCCAAA   | NM_173598: | NM_173598:                                                                                            |
| 112970 | KTI12   | KTI12 homolog, chromatin associated (S. cerevisiae)        | -0.42  | CAGACTAAGAGAAATGGAGAA   | NM_138417: | NM_138417:                                                                                            |
| 112970 | KTI12   | KTI12 homolog, chromatin associated (S. cerevisiae)        | 0.61   | AAGTAAGAAAGTTATCTACTA   | NM_138417: | NM_138417:                                                                                            |
| 3895   | KTN1    | kinectin 1 (kinesin receptor)                              | -0.14  | AACGTGATCGTTTAAACAGTA   | NM_182926: | NM_182926:                                                                                            |
| 3895   | KTN1    | kinectin 1 (kinesin receptor)                              | -1.50  | CACCAAGAGACTAACAAGAAA   | NM_182926: | NM_182926:                                                                                            |
| 3897   | L1CAM   | L1 cell adhesion molecule                                  | -0.20  | CCGCGGATACAATGTGACGTA   | NM_000425: | NM_000425:NM_024003:                                                                                  |
| 3897   | L1CAM   | L1 cell adhesion molecule                                  | -4.44  | CACCCCTCAAGCTGTCCGCCCTA | NM_000425: | NM_000425:NM_024003:                                                                                  |
| 284217 | LAMA1   | laminin, alpha 1                                           | 1.31   | CACCAGTTTGGTCTCACACAA   | NM_005559: | NM_005559:                                                                                            |
| 284217 | LAMA1   | laminin, alpha 1                                           | 1.42   | CCAGACGCTATTATTATCAA    | NM_005559: | NM_005559:                                                                                            |
| 3908   | LAMA2   | laminin, alpha 2 (merosin, congenital muscular dystrophy)  | -0.84  | CTGGACAGCCCTATTATGTAA   | NM_000426: | NM_000426:                                                                                            |
| 3908   | LAMA2   | laminin, alpha 2 (merosin, congenital muscular dystrophy)  | 0.20   | CCGGCTAATAGATAAACCCTAA  | NM_000426: | NM_000426:                                                                                            |
| 3909   | LAMA3   | laminin, alpha 3                                           | -1.52  | CAGGTTTAAATAGGAAATCTAA  | NM_000227: | NM_000227:NM_198129:                                                                                  |
| 3909   | LAMA3   | laminin, alpha 3                                           | -3.42  | CTGGAAGATGGTTACATGGAA   | NM_000227: | NM_000227:NM_198129:                                                                                  |
| 3910   | LAMA4   | laminin, alpha 4                                           | 0.01   | ACAGGTCATAGTGAAGTCAA    | NM_002290: | NM_002290:                                                                                            |
| 3910   | LAMA4   | laminin, alpha 4                                           | -0.18  | ATCAAGGTTTAAATAGTAAA    | NM_002290: | NM_002290:                                                                                            |
| 3911   | LAMA5   | laminin, alpha 5                                           | -0.22  | CTGAAGATGGTTTAAAGTTATA  | NM_005560: | NM_005560:                                                                                            |
| 3911   | LAMA5   | laminin, alpha 5                                           | -0.52  | CCGCATCAGCTTCCAGCAGTCA  | NM_005560: | NM_005560:                                                                                            |
| 3912   | LAMB1   | laminin, beta 1                                            | 1.51   | TCCGTTCACTCCTAAAGGATA   | NM_002291: | NM_002291:                                                                                            |
| 3912   | LAMB1   | laminin, beta 1                                            | 1.06   | TACCAAGATCCTGTACTTTAA   | NM_002291: | NM_002291:                                                                                            |
| 3913   | LAMB2   | laminin, beta 2 (laminin S)                                | -0.44  | GCGAGATAGGCTTGCACTTAA   | NM_002292: | NM_002292:                                                                                            |
| 3913   | LAMB2   | laminin, beta 2 (laminin S)                                | -0.35  | CCAGGCCACCTTTGAACGCTA   | NM_002292: | NM_002292:                                                                                            |
| 3914   | LAMB3   | laminin, beta 3                                            | -1.01  | AAGAGGGATTGAGAGAATAA    | NM_000228: | NM_000228:NM_001017402:                                                                               |
| 3914   | LAMB3   | laminin, beta 3                                            | -1.31  | ACCCGTTGGGTGAGAGTTCCA   | NM_000228: | NM_000228:NM_001017402:                                                                               |
| 3915   | LAMC1   | laminin, gamma 1 (formerly LAMB2)                          | -2.91  | TAGGGATATGATAAACCCTAA   | NM_002293: | NM_002293:                                                                                            |
| 3915   | LAMC1   | laminin, gamma 1 (formerly LAMB2)                          | 0.08   | TAGGTGGCAGATGATAAATGTA  | NM_002293: | NM_002293:                                                                                            |
| 3918   | LAMC2   | laminin, gamma 2                                           | -5.87  | CAGGCATATGGATGAGTTCAA   | NM_005562: | NM_018891:NM_005562:                                                                                  |
| 3918   | LAMC2   | laminin, gamma 2                                           | -4.84  | CCGGACGGTGTCTGGTGCATA   | NM_005562: | NM_018891:NM_005562:                                                                                  |
| 3920   | LAMP2   | lysosomal-associated membrane protein 2                    | 1.13   | TAAGGACTATAGTATTTAAA    | NM_002294: | NM_002294:                                                                                            |
| 3920   | LAMP2   | lysosomal-associated membrane protein 2                    | 1.05   | CTGGAGCATTTTCAGATAAATA  | NM_002294: | NM_013995:NM_002294:                                                                                  |
| 10314  | LANCL1  | LanC lantibiotic synthetase component C-like 1 (bacterial) | -0.98  | AAGGTTGTCAAGGTCATCAA    | NM_006055: | NM_006055:                                                                                            |
| 10314  | LANCL1  | LanC lantibiotic synthetase component C-like 1 (bacterial) | 0.19   | ACGGCTAATTCACCTAAATAA   | NM_006055: | NM_006055:                                                                                            |
| 55915  | LANCL2  | LanC lantibiotic synthetase component C-like 2 (bacterial) | 1.02   | ACCCAGGATATGTACTATAA    | NM_018697: | NM_018697:                                                                                            |
| 55915  | LANCL2  | LanC lantibiotic synthetase component C-like 2 (bacterial) | 0.00   | CTGGCAGTTCGAGAACATTTA   | NM_018697: | NM_018697:                                                                                            |
| 51056  | LAP3    | leucine aminopeptidase 3                                   | 0.91   | AAGCTTAATTTGCCATTAAT    | NM_015907: | NM_015907:                                                                                            |
| 51056  | LAP3    | leucine aminopeptidase 3                                   | 0.07   | AAAGCTTAATTTGCCATTAAT   | NM_015907: | NM_015907:                                                                                            |
| 9215   | LARGE   | like-glycosyltransferase                                   | 0.17   | ACCAGCGAAAGCTGCATTTAA   | NM_004737: | NM_004737:NM_133642:                                                                                  |
| 9215   | LARGE   | like-glycosyltransferase                                   | -0.02  | AAGGGTTATCATCTTACTGCA   | NM_004737: | NM_004737:NM_133642:                                                                                  |
| 51520  | LARS    | leucyl-tRNA synthetase                                     | 1.27   | CACCCTGTCTGTCTTACGTAA   | NM_020117: | NM_020117:                                                                                            |
| 51520  | LARS    | leucyl-tRNA synthetase                                     | 0.03   | TGCTTGTAGCTAGAACACATA   | NM_020117: | NM_020117:                                                                                            |
| 23395  | LARS2   | leucyl-tRNA synthetase 2, mitochondrial                    | -0.24  | CTGACCTAAGCCACTGATTAA   | NM_015340: | NM_015340:                                                                                            |
| 23395  | LARS2   | leucyl-tRNA synthetase 2, mitochondrial                    | 1.24   | CCCGAGAACTGCCCTCATCAA   | NM_015340: | NM_015340:                                                                                            |
| 3927   | LASP1   | LIM and SH3 protein 1                                      | -0.68  | CTGGCCTGTATGATTTCTGAA   | NM_006148: | NM_006148:                                                                                            |
| 3927   | LASP1   | LIM and SH3 protein 1                                      | -0.01  | ACCCTACAACCTGTATTTTAA   | NM_006148: | NM_006148:                                                                                            |
| 253782 | LASS6   | LAG1 longevity assurance homolog 6 (S. cerevisiae)         | 0.23   | CCGGACGAACCTAGGTGTTTAA  | NM_203463: | NM_203463:                                                                                            |
| 253782 | LASS6   | LAG1 longevity assurance homolog 6 (S. cerevisiae)         | 0.51   | CTGGGCTGCATCATATATAA    | NM_203463: | NM_203463:                                                                                            |
| 27040  | LAT     | linker for activation of T cells                           | 2.96   | CCCGTAACCTATTATCACTTT   | NM_014387: | NM_001014988:NM_001014989:NM_014387:NM_0<br>01014987:                                                 |
| 27040  | LAT     | linker for activation of T cells                           | 0.43   | CCTCTGTGGTCTCAATAAA     | NM_014387: | NM_001014987:NM_001014988:NM_001014989:NM<br>M_014387:                                                |
| 9113   | LATS1   | LATS, large tumor suppressor, homolog 1 (Drosophila)       | 1.37   | CCCATGAATCCTCCTAATGAA   | NM_004690: | NM_004690:                                                                                            |
| 9113   | LATS1   | LATS, large tumor suppressor, homolog 1 (Drosophila)       | 0.14   | CGCGATCTAGTATATGTTTAA   | NM_004690: | NM_004690:                                                                                            |
| 26524  | LATS2   | LATS, large tumor suppressor, homolog 2 (Drosophila)       | -0.89  | CACACTCACCTCGCCCAATAA   | NM_014572: | NM_014572:                                                                                            |
| 26524  | LATS2   | LATS, large tumor suppressor, homolog 2 (Drosophila)       | 1.81   | CAGGACCTCACTGACTTAAAT   | NM_014572: | NM_014572:                                                                                            |
| 3929   | LBP     | lipopolysaccharide binding protein                         | -2.37  | CACGCTCAGAGATTTCTGAA    | NM_004139: | NM_004139:                                                                                            |
| 3929   | LBP     | lipopolysaccharide binding protein                         | -0.19  | CAAGATCACTGGGTTCTCGAA   | NM_004139: | NM_004139:                                                                                            |
| 3930   | LBR     | lamin B receptor                                           | 1.93   | TAAGGTAGCTTTAGCAATTA    | NM_002296: | NM_002296:NM_194442:                                                                                  |
| 3930   | LBR     | lamin B receptor                                           | 0.17   | TAGCAATTAATTTCTAGTAA    | NM_002296: | NM_002296:NM_194442:                                                                                  |
| 3931   | LCAT    | lecithin:lecithin-cholesterol acyltransferase              | -0.40  | AACAGCATCTCAACATGGTCT   | NM_000229: | NM_000229:                                                                                            |
| 3931   | LCAT    | lecithin:lecithin-cholesterol acyltransferase              | -2.55  | AACAGCATGTTGGTGAACCTGGA | NM_000229: | NM_000229:                                                                                            |
| 3932   | LCK     | (lymphoc lymphocyte-specific protein tyrosine kinase       | 0.44   | AAGGGCCAGACTTTTACTTAA   | NM_005356: | NM_005356:                                                                                            |
| 3932   | LCK     | (lymphoc lymphocyte-specific protein tyrosine kinase       | -0.09  | AGGCATCAAGTTGACCATCAA   | NM_005356: | NM_005356:                                                                                            |
| 9836   | LCMT2   | leucine carboxyl methyltransferase 2                       | -0.13  | CAGAGGCATTTCCCTGGGTAA   | NM_014793: | NM_014793:                                                                                            |
| 9836   | LCMT2   | leucine carboxyl methyltransferase 2                       | -3.86  | ACCCACTAAAGTAGACAATAA   | NM_014793: | NM_014793:                                                                                            |
| 3938   | LCT     | lactase                                                    | 0.22   | ACGGAGGATCACTGATAGATA   | NM_002299: | NM_002299:                                                                                            |
| 3938   | LCT     | lactase                                                    | -2.32  | CACGGTCAAGTTTGGACTGTA   | NM_002299: | NM_002299:                                                                                            |
| 3939   | LDHA    | lactate dehydrogenase A                                    | -0.08  | AAGTCCAATATGGCAACTCTA   | NM_005566: | NM_005566:                                                                                            |
| 3939   | LDHA    | lactate dehydrogenase A                                    | 0.01   | CAGCTGATTTAATCTTCTA     | NM_005566: | NM_005566:                                                                                            |

|        |                  |                                                                        |       |                        |            |                                      |
|--------|------------------|------------------------------------------------------------------------|-------|------------------------|------------|--------------------------------------|
| 3945   | LDHB             | lactate dehydrogenase B                                                | -2.95 | CACCGCGTGATTGGAAGTGGGA | NM_002300: | NM_002300:                           |
| 3945   | LDHB             | lactate dehydrogenase B                                                | 0.92  | CCAGTGGACATCTTACGTAT   | NM_002300: | NM_002300:                           |
| 3949   | LDLR             | low density lipoprotein receptor (familial hypercholesterolemia)       | -3.23 | CACCGAGACAACTCATTCA    | NM_000527: | NM_000527:                           |
| 3949   | LDLR             | low density lipoprotein receptor (familial hypercholesterolemia)       | -2.05 | CACCGTACACAACTCCTCAA   | NM_000527: | NM_000527:                           |
| 401944 | LDLRAD2 (lo)     | low density lipoprotein receptor class A domain containing 2           | 0.01  | CAGGAAGTACAGATGCCATA   | XM_377577: | NM_001013693:                        |
| 401944 | LDLRAD2 (lo)     | low density lipoprotein receptor class A domain containing 2           | -0.38 | CGGCTCTACCTGCAGTTCTA   | XM_377577: | NM_001013693:                        |
| 143458 | LDLRAD3 (lo)     | low density lipoprotein receptor class A domain containing 3           | 0.96  | AACCTGTTGACGCTAATTA    | NM_174902: | NM_174902:                           |
| 143458 | LDLRAD3 (lo)     | low density lipoprotein receptor class A domain containing 3           | 0.04  | AAGGACTATTTATATGTGA    | NM_174902: | NM_174902:                           |
| 26119  | LDLRAP1          | low density lipoprotein receptor adaptor protein 1                     | 1.60  | GAGGATCGTGGCTACAGCTAA  | NM_015627: | NM_015627:                           |
| 26119  | LDLRAP1          | low density lipoprotein receptor adaptor protein 1                     | 0.73  | CTAGATTTATTTGGAAATATT  | NM_015627: | NM_015627:                           |
| 3950   | LECT2            | leukocyte cell-derived chemotaxin 2                                    | 1.80  | AAGGAAATTTGAGTTTAAATA  | NM_002302: | NM_002302:                           |
| 3950   | LECT2            | leukocyte cell-derived chemotaxin 2                                    | 0.27  | CAGAAAGTTTATCCTGGCATA  | NM_002302: | NM_002302:                           |
| 51176  | LEF1             | lymphoid enhancer-binding factor 1                                     | -0.29 | AAGGTGTTGAGTACAGCTAAA  | NM_016269: | NM_016269:                           |
| 51176  | LEF1             | lymphoid enhancer-binding factor 1                                     | -0.01 | CGGTACATAATGATGCCAAA   | NM_016269: | NM_016269:                           |
| 10637  | LEFTY1           | left-right determination factor 1                                      | 1.24  | CCAGATAATAAGACTTTGTA   | NM_020997: | NM_020997:                           |
| 10637  | LEFTY1           | left-right determination factor 1                                      | -0.88 | CTGACAAGTACCTCACCTAA   | NM_020997: | NM_020997:                           |
| 7044   | LEFTY2           | left-right determination factor 2                                      | 1.37  | AACAATAATACCTATGATTA   | NM_003240: | NM_003240:                           |
| 7044   | LEFTY2           | left-right determination factor 2                                      | 1.03  | AGCACTACGTGAGTAATAA    | NM_003240: | NM_003240:                           |
| 3952   | LEP              | leptin (obesity homolog, mouse)                                        | -1.32 | CCAGAGTGTGAAACTCTTAA   | NM_000230: | NM_000230:                           |
| 3952   | LEP              | leptin (obesity homolog, mouse)                                        | 0.92  | CCCAATAAACATTAAGATTGA  | NM_000230: | NM_000230:                           |
| 3953   | LEPR             | leptin receptor                                                        | 1.05  | ATGGAAGATGTATGAGGTTA   | NM_002303: | NM_001003680/NM_001003679/NM_002303: |
| 3953   | LEPR             | leptin receptor                                                        | -0.07 | TTGCTATTGGTTAAGTGGA    | NM_002303: | NM_001003680/NM_001003679/NM_002303: |
| 54741  | LEPROT           | leptin receptor overlapping transcript                                 | -5.84 | AAGCATCATAGAGAAGTA     | NM_017526: | NM_017526:                           |
| 54741  | LEPROT           | leptin receptor overlapping transcript                                 | -4.93 | CGGCTTTGTTGGCAGGC      | NM_017526: | NM_017526:                           |
| 23484  | LEPROTL1         | leptin receptor overlapping transcript-like 1                          | 3.75  | CAGACGGTGGCATAACGTTAT  | NM_015344: | NM_015344:                           |
| 23484  | LEPROTL1         | leptin receptor overlapping transcript-like 1                          | 3.41  | CAGAGACTTGCTGAAGGATTA  | NM_015344: | NM_015344:                           |
| 25875  | LETMD1           | LETMD1 domain containing 1                                             | 1.67  | CACAATAAAGTTTACCTCAA   | NM_015416: | NM_015416/NM_01024668:               |
| 25875  | LETMD1           | LETMD1 domain containing 1                                             | 1.71  | CACCCAGAAATATTAGTTAT   | NM_015416: | NM_015416/NM_01024668/NM_01024670:   |
| 3956   | LGALS1           | lectin, galactoside-binding, soluble, 1 (galectin 1)                   | -2.96 | CACCATCGTGTGCAACAGCAA  | NM_002305: | NM_002305:                           |
| 3956   | LGALS1           | lectin, galactoside-binding, soluble, 1 (galectin 1)                   | 0.86  | CGCCAGCAACCTGAATCTCAA  | NM_002305: | NM_002305:                           |
| 3959   | LGALS3BP         | lectin, galactoside-binding, soluble, 3 binding protein                | 0.78  | CAGCTTCAAGAAATTAAGTGA  | NM_005567: | NM_005567:                           |
| 3959   | LGALS3BP         | lectin, galactoside-binding, soluble, 3 binding protein                | 0.07  | CTGAGGCTGACGTTCAAGAAA  | NM_005567: | NM_005567:                           |
| 9211   | LGI1             | leucine-rich, glioma inactivated 1                                     | 0.17  | AAGATTCATTTGGTATTC     | NM_005097: | NM_005097:                           |
| 9211   | LGI1             | leucine-rich, glioma inactivated 1                                     | -0.34 | AAGCAACACAAATTAACCTA   | NM_005097: | NM_005097:                           |
| 353174 | LIGCZ1           | ligand-gated ion channel, zinc activated 1                             | 1.88  | CACCAACGAGACCACTGCAA   | NM_180990: | NM_180990:                           |
| 353174 | LIGCZ1           | ligand-gated ion channel, zinc activated 1                             | 1.88  | CTCGCTGGCCTGGAACACTA   | NM_180990: | NM_180990:                           |
| 5641   | LGMN             | legumain                                                               | -0.22 | AAGGGTCATATTTGCTTTCTA  | NM_005606: | NM_005606/NM_001008530:              |
| 5641   | LGMN             | legumain                                                               | 0.67  | CCGTATCCACTTCACAGGATA  | NM_005606: | NM_001008530/NM_005606:              |
| 55366  | LGR4             | leucine-rich repeat-containing G protein-coupled receptor 4            | 0.04  | TAGGATTCATAGTAATCTA    | NM_018490: | NM_018490:                           |
| 55366  | LGR4             | leucine-rich repeat-containing G protein-coupled receptor 4            | 0.02  | TAGGTAGTAGAGCAATATA    | NM_018490: | NM_018490:                           |
| 8549   | LGR5             | leucine-rich repeat-containing G protein-coupled receptor 5            | 1.20  | CAGCAGTATGGACGACCTCA   | NM_003667: | NM_003667:                           |
| 8549   | LGR5             | leucine-rich repeat-containing G protein-coupled receptor 5            | 0.33  | CCCAAGCTTGATGCAATTA    | NM_003667: | NM_003667:                           |
| 59352  | LGR6             | leucine-rich repeat-containing G protein-coupled receptor 6            | -0.09 | CAGGAGTTCCAGATCTCAA    | NM_021636: | NM_001017403/NM_021636/NM_001017404: |
| 59352  | LGR6             | leucine-rich repeat-containing G protein-coupled receptor 6            | 0.42  | CTGGAAGTGTCTCACAATCAA  | NM_021636: | NM_001017403/NM_021636/NM_001017404: |
| 59350  | LGR7             | leucine-rich repeat-containing G protein-coupled receptor 7            | 0.40  | AAAGGATGTTTACAGCTCTTA  | NM_021634: | NM_021634:                           |
| 59350  | LGR7             | leucine-rich repeat-containing G protein-coupled receptor 7            | 0.38  | ACAGACTAGAATGGCTGATA   | NM_021634: | NM_021634:                           |
| 122042 | LGR8             | leucine-rich repeat-containing G protein-coupled receptor 8            | 1.49  | CGGCTGTTTACGGGATTA     | NM_130806: | NM_130806:                           |
| 122042 | LGR8             | leucine-rich repeat-containing G protein-coupled receptor 8            | -2.65 | TCGGGTTGCACGTGCCATGAA  | NM_130806: | NM_130806:                           |
| 1939   | LGTN             | ligatin                                                                | -0.41 | CGGAACGATCGCTAATACTA   | NM_006893: | NM_006893:                           |
| 1939   | LGTN             | ligatin                                                                | -1.78 | CTGGCTATTGCTTGAAGAGTA  | NM_006893: | NM_006893:                           |
| 3972   | LHB              | luteinizing hormone beta polypeptide                                   | -0.02 | CCAGTGTGCATCACCGTCAA   | NM_000894: | NM_000894:                           |
| 3973   | LHCGR            | luteinizing hormone/choriogonadotropin receptor                        | -1.22 | CAGTTCGAACCCAGAAATTA   | NM_000233: | NM_000233:                           |
| 3973   | LHCGR            | luteinizing hormone/choriogonadotropin receptor                        | -0.67 | CCAGAAATTAATGCTACCTAA  | NM_000233: | NM_000233:                           |
| 64077  | LHPP             | phosphotyrosine phosphohistidine inorganic pyrophosphate phosphatase   | 1.54  | CAGGAGGAAACTAACAGTTCA  | NM_022126: | NM_022126:                           |
| 64077  | LHPP             | phosphotyrosine phosphohistidine inorganic pyrophosphate phosphatase   | 1.97  | CCAGTCACTTTGACAGACAA   | NM_022126: | NM_022126:                           |
| 8022   | LHX3             | LIM homeobox 3                                                         | 1.96  | CTGCTATTTCTAGACATGAAA  | NM_014564: | NM_178138/NM_014564:                 |
| 8022   | LHX3             | LIM homeobox 3                                                         | -7.86 | CAGCTCTTCCCAAGACTTCAA  | NM_014564: | NM_178138/NM_014564:                 |
| 89884  | LHX4             | LIM homeobox 4                                                         | -1.40 | TGAAAGTACGCCAATGTGAA   | NM_033343: | NM_033343:                           |
| 89884  | LHX4             | LIM homeobox 4                                                         | -5.53 | CACCAATAGGATTTATGGCAA  | NM_033343: | NM_033343:                           |
| 64211  | LHX5             | LIM homeobox 5                                                         | 0.54  | AAGCAGCTCCTGAAACCAAA   | NM_022363: | NM_022363:                           |
| 64211  | LHX5             | LIM homeobox 5                                                         | 0.03  | TTGATATGCTATAAATTTAA   | NM_022363: | NM_022363:                           |
| 56956  | LHX9 (LIM ho)    | LIM homeobox 9                                                         | -8.93 | CCGGCGTGTGATATGGAAA    | NM_020204: | NM_020204:                           |
| 56956  | LHX9 (LIM ho)    | LIM homeobox 9                                                         | 0.08  | AACCAATTAATTAATGTTA    | NM_020204: | NM_020204/NM_001014434:              |
| 3976   | LIF              | leukemia inhibitory factor (cholinergic differentiation factor)        | -0.01 | CTGGAAGTGCACAAATTTACA  | NM_002309: | NM_002309:                           |
| 3976   | LIF              | leukemia inhibitory factor (cholinergic differentiation factor)        | -3.22 | CTGGTAAAGGCTCTGAAGAA   | NM_002309: | NM_002309:                           |
| 3977   | LIFR             | leukemia inhibitory factor receptor                                    | 0.65  | TGCAGATTGCTATTAAGTAA   | NM_002310: | NM_002310:                           |
| 3977   | LIFR             | leukemia inhibitory factor receptor                                    | -0.39 | TTGGAAGCTTACCCTAATA    | NM_002310: | NM_002310:                           |
| 3978   | LIG1             | ligase I, DNA, ATP-dependent                                           | 0.52  | CCCGTATTCTTTCAATAAA    | NM_000234: | NM_000234:                           |
| 3978   | LIG1             | ligase I, DNA, ATP-dependent                                           | 0.13  | CCGGAGCTTTGAGAAGATCGA  | NM_000234: | NM_000234:                           |
| 3980   | LIG3 (ligase II) | ligase III, DNA, ATP-dependent                                         | -0.31 | CTGGAAGATAATGAGAAGGAA  | NM_002311: | NM_002311/NM_013975:                 |
| 3980   | LIG3 (ligase II) | ligase III, DNA, ATP-dependent                                         | -0.30 | CTGGAAGAGCTGGAAGATAA   | NM_002311: | NM_002311/NM_013975:                 |
| 3981   | LIG4 (ligase I)  | ligase IV, DNA, ATP-dependent                                          | 0.01  | CAAGATGTTTACAGAAAGGAA  | NM_002312: | NM_206937/NM_002312:                 |
| 3981   | LIG4 (ligase I)  | ligase IV, DNA, ATP-dependent                                          | 1.32  | TTGGAATTTAGAGCACTTAA   | NM_002312: | NM_206937/NM_002312:                 |
| 11025  | LILRB3           | leukocyte immunoglobulin-like receptor, subfamily B (with TM and ITIM) | -1.20 | CTGACTCAAGAGTACTAATA   | NM_006864: | NM_006864:                           |
| 11025  | LILRB3           | leukocyte immunoglobulin-like receptor, subfamily B (with TM and ITIM) | -2.28 | CAGGGTGGAGCTGGACAGTCA  | NM_006864: | NM_006864:                           |
| 3982   | LIM2             | lens intrinsic membrane protein 2, 19kDa                               | 1.47  | CCCAAGCATACTGGAATGCCA  | NM_030657: | NM_030657:                           |
| 3982   | LIM2             | lens intrinsic membrane protein 2, 19kDa                               | 0.19  | ATGGAAGTATCCATTAGAGCAA | NM_030657: | NM_030657:                           |
| 3984   | LIMK1            | LIM domain kinase 1                                                    | 0.23  | CACCATGGACTTTGGCCTCAA  | NM_002314: | NM_016735/NM_002314:                 |
| 3984   | LIMK1            | LIM domain kinase 1                                                    | 0.87  | CTGCTGTCCGCGAGAACAA    | NM_002314: | NM_016735/NM_002314:                 |
| 3985   | LIMK2 (LIM d)    | LIM domain kinase 2                                                    | 0.34  | CAGGAGGAATCTGTAAGTCA   | NM_005569: | NM_005569/NM_016733:                 |
| 3985   | LIMK2 (LIM d)    | LIM domain kinase 2                                                    | -0.14 | CAGGGTGAACCTGCCTGTGAA  | NM_005569: | NM_005569/NM_016733:                 |
| 3987   | LIMS1            | LIM and senescent cell antigen-like domains 1                          | 0.95  | AAACACATGGTTAAATGTTAA  | NM_004987: | NM_004987:                           |
| 3987   | LIMS1            | LIM and senescent cell antigen-like domains 1                          | 1.13  | AACATTAATGCTTTGATCTA   | NM_004987: | NM_004987:                           |
| 8825   | LIN7A            | lin-7 homolog A (C. elegans)                                           | 1.36  | TCCGATAGTCAAAATTTGAA   | NM_004664: | NM_004664:                           |
| 8825   | LIN7A            | lin-7 homolog A (C. elegans)                                           | 1.11  | CCCATTTATATCTCTCGATA   | NM_004664: | NM_004664:                           |
| 64130  | LIN7B            | lin-7 homolog B (C. elegans)                                           | 0.73  | CACGTGCACTCTCTCTGTA    | NM_022165: | NM_022165:                           |
| 64130  | LIN7B            | lin-7 homolog B (C. elegans)                                           | 1.06  | CAGGGTATGAGGCTACCCAA   | NM_022165: | NM_022165:                           |
| 55327  | LIN7C            | lin-7 homolog C (C. elegans)                                           | 0.35  | TGGCATATTGACCCATATAA   | NM_018362: | NM_018362:                           |
| 55327  | LIN7C            | lin-7 homolog C (C. elegans)                                           | 1.26  | TCAACCGTACCAAAATTTAA   | NM_018362: | NM_018362:                           |
| 286826 | LIN9             | lin-9 homolog (C. elegans)                                             | -0.89 | CCAGTGAATTTCTTATCCAA   | NM_173083: | NM_173083:                           |
| 286826 | LIN9             | lin-9 homolog (C. elegans)                                             | -0.40 | ACGAGTGGTGTATTCAATAA   | NM_173083: | NM_173083:                           |
| 3988   | LIPA             | lipase A, lysosomal acid, cholesterol esterase (Wolman disease)        | 0.48  | CCCGTACTGCTGTTATTGAT   | NM_000235: | NM_000235:                           |
| 3988   | LIPA             | lipase A, lysosomal acid, cholesterol esterase (Wolman disease)        | -0.13 | CTGACTAAGCGAGGTATAAA   | NM_000235: | NM_000235:                           |
| 3990   | LIPC             | lipase, hepatic                                                        | -6.70 | CAGGAGAAACCCAGCAAGAA   | NM_000236: | NM_000236:                           |
| 3990   | LIPC             | lipase, hepatic                                                        | -0.89 | CTGAAGACGATCAGAGTCAA   | NM_000236: | NM_000236:                           |
| 8513   | LIPF             | lipase, gastric                                                        | -1.83 | CAGGCTGTTAAGTCTGGGAAA  | NM_004190: | NM_004190:                           |
| 8513   | LIPF             | lipase, gastric                                                        | 0.67  | CAGCAATGCCTATTATAAT    | NM_004190: | NM_004190:                           |
| 3988   | LIPG             | lipase, endothelial                                                    | -1.09 | CAAGCCATGAGGAAAGTTA    | NM_006033: | NM_006033:                           |

|        |           |                                                                              |       |                        |               |                                |
|--------|-----------|------------------------------------------------------------------------------|-------|------------------------|---------------|--------------------------------|
| 9388   | LIPG      | lipase, endothelial                                                          | -2.32 | CGGGCAAGTCTTGCCAGCAA   | NM_006033:    | NM_006033:                     |
| 200879 | LIPH      | lipase, member H                                                             | -0.01 | TACCAATGTAATCTATGATTA  | NM_139248:    | NM_139248:                     |
| 200879 | LIPH      | lipase, member H                                                             | 0.86  | CACACGTAGAAGGGAACGAAA  | NM_139248:    | NM_139248:                     |
| 149998 | LIP1      | lipase, member I                                                             | -1.37 | ACCATATAGCAGATTAGATTA  | NM_198996:    | NM_198996:                     |
| 149998 | LIP1      | lipase, member I                                                             | 0.08  | AAGATTCCCTCAGAGATTA    | NM_198996:    | NM_198996:                     |
| 142910 | LIPL1     | lipase-like, ab-hydrolase domain containing 1                                | 0.83  | CGTGTGTGTTTAAAGATCTA   | XM_084377:    | NM_001010939:                  |
| 142910 | LIPL1     | lipase-like, ab-hydrolase domain containing 1                                | -3.87 | CAACTGCAATTTGGAATGGTA  | XM_084377:    | NM_001010939:                  |
| 340654 | LIPL3     | lipase-like, ab-hydrolase domain containing 3                                | -0.09 | CAGGACTAAATGGCTGTTAA   | XM_291663:    | XM_291663:                     |
| 340654 | LIPL3     | lipase-like, ab-hydrolase domain containing 3                                | 0.21  | CAGGATACTCCCTCAAAATCAA | XM_291663:    | XM_291663:                     |
| 9516   | LITAF     | lipopolysaccharide-induced TNF factor                                        | 0.70  | GCCAAATGTAGTCTCACTTAA  | NM_004862:    | NM_004862:                     |
| 9516   | LITAF     | lipopolysaccharide-induced TNF factor                                        | 0.48  | TGCCAATGTAGTCTCACTTAA  | NM_004862:    | NM_004862:                     |
| 3996   | LLGL1     | lethal giant larvae homolog 1 (Drosophila)                                   | 0.04  | CACGGTAGCCACCACACCTTA  | NM_004140:    | NM_004140:                     |
| 3993   | LLGL2     | lethal giant larvae homolog 2 (Drosophila)                                   | -1.39 | CTCCTGCGTCTTCCACCAATA  | NM_004524:    | NM_004524:                     |
| 3993   | LLGL2     | lethal giant larvae homolog 2 (Drosophila)                                   | -4.89 | CTGCGCGATGAGCACACACTA  | NM_004524:    | NM_001031803:NM_004524:        |
| 3998   | LMAN1     | lectin, mannose-binding, 1                                                   | 0.05  | TTGATGATCTGAGGATTTAA   | NM_005570:    | NM_005570:                     |
| 3998   | LMAN1     | lectin, mannose-binding, 1                                                   | -0.16 | CACGATGTAATTCACGCTCAA  | NM_005570:    | NM_005570:                     |
| 81562  | LMAN2L    | lectin, mannose-binding 2-like                                               | 0.49  | TCCAGTGTTCGAAACCCAAA   | NM_030805:    | NM_030805:                     |
| 81562  | LMAN2L    | lectin, mannose-binding 2-like                                               | -1.96 | AACCTTATCCACTGCCTTA    | NM_030805:    | NM_030805:                     |
| 55716  | LMBR1L    | limb region 1 homolog (mouse)-like                                           | -5.97 | CACCACAGTTTCATCTACAA   | NM_018113:    | NM_018113:                     |
| 55716  | LMBR1L    | limb region 1 homolog (mouse)-like                                           | -0.11 | TCCGCGAGTGTATTATATCAA  | NM_018113:    | NM_018113:                     |
| 89782  | LMLN      | leishmanolysin-like (metallopeptidase M8 family)                             | -0.01 | TCGGTTGTCTAATTCAGAAA   | NM_033029:    | NM_033029:                     |
| 89782  | LMLN      | leishmanolysin-like (metallopeptidase M8 family)                             | -1.04 | ATGGGATGTGAGATAATAA    | NM_033029:    | NM_033029:                     |
| 4000   | LMNA      | lamin A/C                                                                    | -0.95 | CCAGGAGCTTCGGACATCAA   | NM_005572:    | NM_170707:NM_005572:           |
| 4000   | LMNA      | lamin A/C                                                                    | -0.94 | CCCACCAAGTTCACCCTGAA   | NM_005572:    | NM_170707:NM_170708:NM_005572: |
| 4004   | LMO1      | LIM domain only 1 (rhombotin 1)                                              | 0.65  | CGGACAAAGCGGGTAATTAGA  | NM_002315:    | NM_002315:                     |
| 4004   | LMO1      | LIM domain only 1 (rhombotin 1)                                              | 2.55  | CAGGGTTATGAGCTATCAAA   | NM_002315:    | NM_002315:                     |
| 4005   | LMO2      | LIM domain only 2 (rhombotin-like 1)                                         | 0.47  | CACAGATTGTTCTATACAAA   | NM_005574:    | NM_005574:                     |
| 4005   | LMO2      | LIM domain only 2 (rhombotin-like 1)                                         | 0.57  | CAGATAGAGAGTTGTTGTGA   | NM_005574:    | NM_005574:                     |
| 55885  | LMO3      | LIM domain only 3 (rhombotin-like 2)                                         | 1.10  | TAGTTGAATTTATTTATTTAA  | M86528:       | NM_001001395:NM_018640:        |
| 22853  | LMTK2     | lemur tyrosine kinase 2                                                      | 0.90  | CACCTCCGACTTAAATGTGAA  | NM_014916:    | NM_014916:                     |
| 22853  | LMTK2     | lemur tyrosine kinase 2                                                      | -0.18 | CAGATCAGACTAAGTATAGTA  | NM_014916:    | NM_014916:                     |
| 114783 | LMTK3     | lemur tyrosine kinase 3                                                      | -0.11 | CGGGGAGGATGTGCAAGGAA   | XM_055866:    | XM_055866:                     |
| 114783 | LMTK3     | lemur tyrosine kinase 3                                                      | -4.04 | CGGGGAGACAGCCAGGAA     | XM_055866:    | XM_055866:                     |
| 4012   | LNPEP     | leucyl/cystinyl aminopeptidase                                               | -0.04 | CACGTAATGCCAACCATCTA   | NM_005575:    | NM_005575:NM_175920:           |
| 4012   | LNPEP     | leucyl/cystinyl aminopeptidase                                               | -0.11 | TCCAATGGAACTGAAAGCCTA  | NM_005575:    | NM_175920:NM_005575:           |
| 84708  | LNX1      | ligand of numb-protein X 1                                                   | 0.36  | CACAGCTAACACAGCTCTTTA  | NM_032622:    | NM_032622:                     |
| 84708  | LNX1      | ligand of numb-protein X 1                                                   | 1.29  | CTCGCTCAGAGAAATTAATTAT | NM_032622:    | NM_032622:                     |
| 222484 | LNX2      | ligand of numb-protein X 2                                                   | -2.86 | CACCGTATTAGCAGACCAA    | NM_153371:    | NM_153371:                     |
| 222484 | LNX2      | ligand of numb-protein X 2                                                   | -0.48 | CAGCCACTTAGTTTACCAGAA  | NM_153371:    | NM_153371:                     |
| 112714 | LOC112714 | similar to alpha tubulin                                                     | 1.10  | TTCAAGTTGTTGCAATTTAA   | NM_207312:    | NM_207312:                     |
| 116143 | LOC116143 | monad                                                                        | 0.70  | ACGGTGGGAGACAAACATCAA  | NM_138458:    | NM_138458:                     |
| 116143 | LOC116143 | monad                                                                        | -2.14 | AAGGTGGGACCCAAAGGCAA   | NM_138458:    | NM_138458:                     |
| 124446 | LOC124446 | hypothetical protein BC017488                                                | 0.65  | GCACAACCTGGCTTATCACA   | XM_378175:    | NM_194280:XM_378175:           |
| 124446 | LOC124446 | hypothetical protein BC017488                                                | 0.09  | TGAAGGCCCTGTGCTGACCAA  | XM_378175:    | NM_194280:XM_378175:           |
| 125893 | LOC125893 | hypothetical protein LOC125893                                               | -1.84 | CTCGAACATGTTTCAGACTAA  | BC028701:     | NM_001031665:                  |
| 127406 | LOC127406 | similar to laminin receptor 1 (ribosomal protein SA)                         | 0.16  | GTGGTTTGATAGACTCTGAA   | XM_497679:    | XM_497679:                     |
| 127406 | LOC127406 | similar to laminin receptor 1 (ribosomal protein SA)                         | -0.78 | TGGCTGGATCTTGCCATGTA   | XM_497679:    | XM_497679:                     |
| 130576 | LOC130576 | hypothetical protein LOC130576                                               | -2.34 | AACGGTGAACCTTTGGAGTGAA | NM_177964:    | NM_177964:                     |
| 130576 | LOC130576 | hypothetical protein LOC130576                                               | 0.05  | AAGACAATGGTCCACAAA     | NM_177964:    | NM_177964:                     |
| 133308 | LOC133308 | hypothetical protein BC009732                                                | -1.48 | CTGCAGAAAGTTGAAACATCAA | NM_178833:    | NM_178833:                     |
| 133308 | LOC133308 | hypothetical protein BC009732                                                | -1.10 | CAACGATAATGTGCAGATCAA  | NM_178833:    | NM_178833:                     |
| 134145 | LOC134145 | hypothetical protein LOC134145                                               | -0.60 | CACCTAGCTTTGCTCCATAA   | NM_199133:    | NM_199133:                     |
| 134145 | LOC134145 | hypothetical protein LOC134145                                               | -3.87 | CTGGGATAATGGTACACATAA  | NM_199133:    | NM_199133:                     |
| 134541 | LOC134541 | similar to odd Oz/ten-m homolog 2                                            | -0.65 | CTCAGTAGTCTTCTAGACAAA  | XM_068903:    | XM_068903:                     |
| 134541 | LOC134541 | similar to odd Oz/ten-m homolog 2                                            | 0.94  | CGGCACTAGATGCTGTTTAA   | XM_068903:    | XM_068903:                     |
| 136242 | LOC136242 | similar to RIKEN cDNA 1700016G05                                             | -0.37 | CACCTGAAATATGCTTCTTA   | XM_379939:    | NM_001008270:XM_379939:        |
| 136242 | LOC136242 | similar to RIKEN cDNA 1700016G05                                             | -0.08 | ACCAATGTTTACAAATATGTA  | XM_379939:    | NM_001008270:XM_379939:        |
| 136242 | LOC136242 | similar to RIKEN cDNA 1700016G05                                             | 0.12  | CCACATGAAATATGCTTCTTA  | XM_059830:    | NM_001008270:XM_379939:        |
| 136242 | LOC136242 | similar to RIKEN cDNA 1700016G05                                             | 1.88  | ACCAATGTTTACAAATATGTA  | XM_059830:    | NM_001008270:XM_379939:        |
| 145814 | LOC145814 | hypothetical protein LOC145814                                               | -0.69 | AACCATGGTCCCTCCAGCCAAA | XM_372592:    | XM_372592:                     |
| 145814 | LOC145814 | hypothetical protein LOC145814                                               | -0.15 | CAGGAGAAAGAACACTCTGAA  | XM_372592:    | XM_372592:                     |
| 146909 | LOC146909 | hypothetical protein LOC146909                                               | 1.10  | CCGCACTAGTACACAGATTTT  | XM_085634:    | XM_085634:                     |
| 146909 | LOC146909 | hypothetical protein LOC146909                                               | 0.57  | CAAGAAGGCTTTAGTCTGAA   | XM_085634:    | XM_085634:                     |
| 150159 | LOC150159 | CG10806-like                                                                 | 0.15  | CGCCATTATGATCCAAAGCAA  | XM_375344:    | XM_375344:NM_139173:           |
| 150159 | LOC150159 | CG10806-like                                                                 | -2.89 | CTCATTTAGTCTAATAACT    | NM_139173:    | NM_139173:                     |
| 150159 | LOC150159 | CG10806-like                                                                 | -2.86 | TAAGAGGAGATTGAATGTTAA  | NM_139173:    | NM_139173:                     |
| 158160 | LOC158160 | hypothetical protein LOC158160                                               | -0.01 | AGCGACATTAATCTTGAGAAA  | NM_182829:    | NM_182829:                     |
| 158160 | LOC158160 | hypothetical protein LOC158160                                               | 0.47  | TGCTGTGTGTTATGATTTAA   | NM_182829:    | NM_182829:                     |
| 196541 | LOC196541 | OTTHUMP0000018663                                                            | 1.01  | ACGAAGTTACATGTTTAAATA  | XM_116936:    | NM_001010977:                  |
| 196541 | LOC196541 | OTTHUMP0000018663                                                            | 1.36  | TAAGATTATCTGTTTAACTA   | XM_116936:    | NM_001010977:                  |
| 197350 | LOC197350 | hypothetical protein LOC197350                                               | -0.12 | GGGGTGGCCGCAATAAATA    | XM_113871:    | XM_113871:                     |
| 197350 | LOC197350 | hypothetical protein LOC197350                                               | 0.17  | AGCAGACATCTGACGCTCTA   | XM_113871:    | XM_113871:                     |
| 203427 | LOC203427 | similar to solute carrier family 25, member 16                               | -1.22 | AGCACCTATCTATGATTTAA   | NM_145305:    | NM_145305:                     |
| 203427 | LOC203427 | similar to solute carrier family 25, member 16                               | -0.98 | CACTTTATAGAGATTCTGTTAA | NM_145305:    | NM_145305:                     |
| 220429 | LOC220429 | similar to Cutaneous T-cell lymphoma-associated antigen 5 (cTAGE-5           | 0.22  | CGGGTAGAGAAAGAGAAATT   | XM_166966:    | XM_166966:                     |
| 220429 | LOC220429 | similar to Cutaneous T-cell lymphoma-associated antigen 5 (cTAGE-5           | -0.18 | AAGATTATATACCATGAGAAA  | XM_166966:    | XM_166966:                     |
| 220594 | LOC220594 | TL132 protein                                                                | 0.25  | TAGGATTCCAAAGTTGTTAA   | NM_145809:    | NM_145809:                     |
| 220594 | LOC220594 | TL132 protein                                                                | -2.48 | CTGGCTTCTGATTTAAGATA   | NM_145809:    | NM_145809:                     |
| 222967 | LOC222967 | hypothetical protein LOC222967                                               | -3.15 | CTGGATGCTGAAAGACTTTAA  | NM_173565:    | NM_173565:                     |
| 222967 | LOC222967 | hypothetical protein LOC222967                                               | -4.44 | ACCGAGAACATTCGTCACAA   | NM_173565:    | NM_173565:                     |
| 283116 | LOC283116 | similar to RING finger protein 18 (Testis-specific ring-finger protein)      | -0.83 | AGCCTTCAATGTTAATTACTA  | XM_208043:    | XM_208043:                     |
| 283130 | LOC283130 | hypothetical protein LOC283130                                               | -3.14 | GCGCTTCTCAGAGCTATTAA   | NM_182556:    | NM_182556:                     |
| 283130 | LOC283130 | hypothetical protein LOC283130                                               | -1.26 | CCCGCTGCTTCACTCTTTA    | NM_182556:    | NM_182556:                     |
| 284293 | LOC284293 | similar to Placental thrombin inhibitor (Cytoplasmic antiproteinase) (C/     | -0.58 | AACAATCTGAAACATTTAA    | XM_209104:    | XM_209104:                     |
| 284293 | LOC284293 | similar to Placental thrombin inhibitor (Cytoplasmic antiproteinase) (C/     | -0.04 | CAGCTAGACTTTGTAAGAT    | XM_209104:    | XM_209104:                     |
| 284672 | LOC284672 | similar to inactive progesterone receptor, 23 kD                             | -0.44 | CAGCTTAGGGAAGAGAGCTA   | XM_208234:    | XM_208234:                     |
| 284672 | LOC284672 | similar to inactive progesterone receptor, 23 kD                             | 1.55  | CTGGAGAGAAAGGACTCCAT   | XM_208234:    | XM_208234:                     |
| 285643 | LOC285643 | KIF4B                                                                        | 0.66  | GCGGTAGAAGAAAGGCTCAA   | XM_209695:    | XM_209695:                     |
| 285643 | LOC285643 | KIF4B                                                                        | 0.09  | AAGGAAGGTTTGCAGCTCGA   | XM_209695:    | XM_209695:                     |
| 286495 | LOC286495 | similar to Tetratricopeptide repeat protein 3 (TPR repeat protein 3) (TF     | -0.27 | CAGGAGAGTATTACAAAGTAA  | XM_208438:    | XM_208438:                     |
| 286495 | LOC286495 | similar to Tetratricopeptide repeat protein 3 (TPR repeat protein 3) (TF     | 0.55  | CAGGGTGTGCTGATGTTCAA   | XM_208438:    | XM_208438:                     |
| 338328 | LOC338328 | high density lipoprotein-binding protein                                     | 1.53  | CACCGATTCAACACTCCATTA  | NM_178172:    | NM_178172:                     |
| 338328 | LOC338328 | high density lipoprotein-binding protein                                     | 1.20  | AAGTACAGAGTGAAGCTTAA   | NM_178172:    | NM_178172:                     |
| 339799 | LOC339799 | similar to eukaryotic translation initiation factor 3, subunit 5 epsilon, 47 | 0.49  | TACGCATATGACACTGAA     | XM_290345:    | XM_290345:                     |
| 342897 | LOC342897 | similar to F-box only protein 2                                              | -1.16 | CCGATCCTTATGCTTCCATTA  | NM_001001414: | NM_001001414:                  |
| 342897 | LOC342897 | similar to F-box only protein 2                                              | 0.93  | AACGGAGTGGGTGGCAGCAA   | NM_001001414: | NM_001001414:                  |
| 342931 | LOC342931 | similar to ret finger protein-like 1                                         | -3.86 | AACGATCTCATGTTTCTGAA   | XM_292796:    | XM_292796:                     |
| 342931 | LOC342931 | similar to ret finger protein-like 1                                         | -1.24 | GAGGAAATACCAGTCTTTA    | XM_292796:    | XM_292796:                     |
| 345051 | LOC345051 | similar to stromal cell derived factor receptor 2                            | 0.11  | CAGCTTCTTACCTCAGTCAA   | XM_293680:    | XM_293680:                     |



|        |           |                                                                            |       |                        |            |                                |
|--------|-----------|----------------------------------------------------------------------------|-------|------------------------|------------|--------------------------------|
| 345051 | LOC345051 | similar to stromal cell derived factor receptor 2                          | 1.12  | CCAGCTTTGATTCAGTGAAA   | XM_293680: | XM_293680:                     |
| 352909 | LOC352909 | similar to hypothetical testis protein from macaque                        | -3.64 | CACCCAGATGGTTCAGTAAA   | NM_178837: | NM_001031802:NM_178837:        |
| 352909 | LOC352909 | similar to hypothetical testis protein from macaque                        | 0.18  | TGGTCTATTCTCGAATTTCTA  | NM_178837: | NM_001031802:NM_178837:        |
| 375449 | LOC375449 | similar to microtubule associated testis specific serine/threonine protei  | 0.63  | TGTAATTGCCACCACATTAAA  | NM_198828: | NM_198828:                     |
| 375449 | LOC375449 | similar to microtubule associated testis specific serine/threonine protei  | 0.47  | GAGGAGCTTGACCACATATTTA | NM_198828: | NM_198828:                     |
| 387870 | LOC387870 | similar to protein tyrosine phosphatase, receptor type, Q isoform 1 pre    | 1.79  | TAGCAGAAGAGGAACITTTAA  | XM_291991: | XM_291991:                     |
| 387870 | LOC387870 | similar to protein tyrosine phosphatase, receptor type, Q isoform 1 pre    | -0.10 | CACGATATGTTGTCTTGAA    | XM_291991: | XM_291991:                     |
| 388720 | LOC388720 | similar to ubiquitin and ribosomal protein S27a precursor                  | 1.76  | TGGATACAATAGATAATGTA   | XM_371330: | XM_371330:                     |
| 388743 | LOC388743 | similar to calpain 8                                                       | -3.65 | CAGGGTGGTCTAGGTGAGTAA  | XM_371344: | XM_371344:                     |
| 388743 | LOC388743 | similar to calpain 8                                                       | 0.17  | AAGGTCTGGCTCCAAACCCAAA | XM_371344: | XM_371344:                     |
| 389207 | LOC389207 | similar to glutaredoxin cysteine-rich 1 protein                            | 0.15  | AACAATTTGCCAAAGTATTA   | XM_371694: | XM_371694:                     |
| 389207 | LOC389207 | similar to glutaredoxin cysteine-rich 1 protein                            | 0.15  | ATCAATAAACCTTTGTTTATTA | XM_371694: | XM_371694:                     |
| 389289 | LOC389289 | similar to annexin II receptor                                             | 0.08  | TACGATTGTAGATTCTTAGA   | XM_371738: | NM_001014279:                  |
| 389289 | LOC389289 | similar to annexin II receptor                                             | 0.92  | CACGGGCTCTGCAGAGCATAA  | XM_371738: | NM_001014279:                  |
| 389425 | LOC389425 | similar to ribosomal protein S27a                                          | -0.80 | CTGATCTTTGCTGGAAGCAA   | XM_371843: | XM_371843:                     |
| 390282 | LOC390282 | similar to eukaryotic translation initiation factor 3, subunit 5 (epsilon) | 0.67  | AACGTCAGAGTGAATAATGTA  | XM_372447: | XM_372447:                     |
| 390282 | LOC390282 | similar to eukaryotic translation initiation factor 3, subunit 5 (epsilon) | 0.28  | CGAGATCATGCTCAACGGTAA  | XM_372447: | XM_372447:                     |
| 390564 | LOC390564 | similar to Neuronal acetylcholine receptor protein, beta-4 subunit prec    | -0.74 | CAGGGTCAGCGAATGCCAGA   | XM_372562: | XM_372562:                     |
| 390846 | LOC390846 | similar to 27 kDa Golgi SNARE protein (Golgi SNAP receptor complex         | -0.77 | TTGGAGATTATATCTGTGTTA  | XM_372693: | XM_372693:                     |
| 390846 | LOC390846 | similar to 27 kDa Golgi SNARE protein (Golgi SNAP receptor complex         | 0.02  | TTAGTAGAAGGTGAAATCCAA  | XM_372693: | XM_372693:                     |
| 390874 | LOC390874 | similar to one cut domain, family member 3                                 | -0.07 | CACGCTGATCGCCATCTTCAA  | XM_372702: | XM_372702:                     |
| 390975 | LOC390975 | similar to SH3-binding kinase                                              | 1.86  | ATGAACTAGATCCAAATCCAA  | XM_372749: | XM_372749:                     |
| 390975 | LOC390975 | similar to SH3-binding kinase                                              | -7.98 | CCCGGCAACAGCTGAGGAA    | XM_372749: | XM_372749:                     |
| 391025 | LOC391025 | similar to protein tyrosine phosphatase, receptor type, U isoform 2 pre    | -1.08 | CTCATTAATTATGATTATTGA  | XM_372775: | XM_372775:                     |
| 391025 | LOC391025 | similar to protein tyrosine phosphatase, receptor type, U isoform 2 pre    | -4.07 | CAAGGATTCGGGAACAGAAA   | XM_372775: | XM_372775:                     |
| 391599 | LOC391599 | similar to Cytochrome P450 2F2 (CYP11F2) (Naphthalene dehydrogen           | 0.64  | TGGGCAAGGATGGAACCTTT   | XM_497949: | XM_497949:                     |
| 391599 | LOC391599 | similar to Cytochrome P450 2F2 (CYP11F2) (Naphthalene dehydrogen           | 1.17  | CAGGAGATATTTAGGTACCAA  | XM_497949: | XM_497949:                     |
| 399818 | LOC399818 | similar to CG9643-PA                                                       | 0.01  | AGGGTAGTGAAGTTATATAA   | NM_125554: | NM_125554:                     |
| 399818 | LOC399818 | similar to CG9643-PA                                                       | -1.48 | CAGCGATAGATGCACAAGAT   | NM_125554: | NM_125554:                     |
| 399937 | LOC399937 | similar to RING finger protein 18 (Testis-specific ring-finger protein)    | -5.06 | CAGAGTGTGAGTGACTTTTA   | XM_374917: | XM_374917:                     |
| 399939 | LOC399939 | similar to RING finger protein 18 (Testis-specific ring-finger protein)    | -1.60 | ACGAATCAGAATGCCAATATA  | XM_208061: | XM_208061:XM_374919:           |
| 400301 | LOC400301 | similar to protein kinase CHK2 isoform b                                   | -1.25 | TGGGCTTAAGTACTTCTGAAA  | XM_375150: | XM_375150:                     |
| 400301 | LOC400301 | similar to protein kinase CHK2 isoform b                                   | -1.61 | CTGCTGGGATGAAGACATGAA  | XM_375150: | XM_375150:                     |
| 400891 | LOC400891 | similar to chromosome 14 open reading frame 166B                           | 0.36  | CAGACGCTGAGGATCTTGTGA  | XM_497793: | NM_001013675:XM_497793:        |
| 401087 | LOC401087 | hypothetical LOC401087                                                     | -2.82 | ACGGTCTATGTTGGCACAAGA  | XM_376267: | XM_376267:                     |
| 401087 | LOC401087 | hypothetical LOC401087                                                     | 0.61  | ACGAATTTGCCAAATGGACAA  | XM_376267: | XM_376267:                     |
| 401358 | LOC401358 | similar to zinc finger protein 595                                         | 0.91  | AACGTGCTAAGTATCGATAAA  | XM_379495: | XM_380114:XM_379495:           |
| 401358 | LOC401358 | similar to zinc finger protein 595                                         | -1.09 | AAGGCGATACATGGTAATTAT  | XM_379495: | XM_380114:XM_379495:           |
| 401525 | LOC401525 | similar to CDK2-associated protein 2                                       | -0.46 | ATGGCTATTTATGAACTGTA   | XM_376869: | XM_376869:                     |
| 401525 | LOC401525 | similar to CDK2-associated protein 2                                       | 0.15  | CACCTATGTAATATCTTATA   | XM_376869: | XM_376869:                     |
| 402036 | LOC402036 | similar to carbonic anhydrase 15                                           | 0.49  | CACGGAGGTGAGAGAGACAAA  | XM_377696: | XM_377696:                     |
| 402036 | LOC402036 | similar to carbonic anhydrase 15                                           | -0.14 | CTGGAGATGACAGCCACACA   | XM_377696: | XM_372889:XM_496497:XM_377696: |
| 407835 | LOC407835 | mitogen-activated protein kinase kinase 2 pseudogene                       | -2.91 | OTGCTGGACTATATTTGAAA   | NR_002144: | NR_002144:                     |
| 440040 | LOC440040 | similar to Metabotropic glutamate receptor 5 precursor (mGluR5)            | -1.16 | CCACATGGATCATCTAACTAA  | XM_495873: | XM_495873:                     |
| 440059 | LOC440059 | similar to surface glycoprotein, Ig superfamily member                     | 0.32  | CAGCAACAATTTACATTTGAAA | XM_495891: | XM_495891:                     |
| 440059 | LOC440059 | similar to surface glycoprotein, Ig superfamily member                     | -0.18 | CACCTCAGATGTGGCCAAATA  | XM_495891: | XM_495891:                     |
| 442428 | LOC442428 | similar to fructose-1,6-bisphosphatase 2                                   | -0.15 | CAACATTTGACCATAGTTTAA  | XM_498334: | XM_498334:                     |
| 442428 | LOC442428 | similar to fructose-1,6-bisphosphatase 2                                   | 0.75  | CAAGATTAGTAAAGAAAGGAAA | XM_498334: | XM_498334:                     |
| 51035  | LOC51035  | unknown protein LOC51035                                                   | -2.10 | TAGGGAGGCGCTGAGGAAA    | NM_015853: | NM_015853:                     |
| 51035  | LOC51035  | unknown protein LOC51035                                                   | -0.41 | CCAGACAAGAGTTAGAGAAA   | NM_015853: | NM_015853:                     |
| 51136  | LOC51136  | PTD016 protein                                                             | 1.53  | ATGATACATATAGTATTGTA   | NM_016125: | NM_016125:                     |
| 51136  | LOC51136  | PTD016 protein                                                             | 1.11  | AACAGCAATTTGAAATAGAA   | NM_016125: | NM_016125:                     |
| 51255  | LOC51255  | hypothetical protein LOC51255                                              | 0.77  | TAACCTTGAATCCTCATTTAA  | NM_016494: | NM_016494:                     |
| 63929  | LOC63929  | hypothetical protein LOC63929                                              | -1.76 | CACCTAGTACCTACCAACAAA  | NM_022098: | NM_022098:                     |
| 63929  | LOC63929  | hypothetical protein LOC63929                                              | -0.93 | TCGGTATTTGGGGCGCCAAA   | NM_022098: | NM_022098:                     |
| 90826  | LOC90826  | hypothetical protein BC004337                                              | 1.35  | CACCAAGAGGAATACAATTTA  | NM_138364: | NM_138364:                     |
| 90826  | LOC90826  | hypothetical protein BC004337                                              | -3.33 | CAGACAAGTTATGGAGCATAA  | NM_138364: | NM_138364:                     |
| 91461  | LOC91461  | hypothetical protein BC007901                                              | 1.16  | CAACGTTGCAATATGGCCAAA  | XM_038576: | XM_138370:                     |
| 91461  | LOC91461  | hypothetical protein BC007901                                              | -2.24 | CAGGATGTGGGTGATCTGTA   | XM_038576: | XM_138370:                     |
| 91664  | LOC91664  | hypothetical protein BC007307                                              | 0.01  | ACCGCCGCTATTTCCAGATA   | XM_039908: | XM_039908:                     |
| 91664  | LOC91664  | hypothetical protein BC007307                                              | -0.15 | AACCTGGTGCACAAGATACAAA | XM_039908: | XM_039908:                     |
| 92312  | LOC92312  | hypothetical protein LOC92312                                              | -1.09 | ATCCTCGATACACAATGAAA   | XM_044166: | XM_044166:                     |
| 92312  | LOC92312  | hypothetical protein LOC92312                                              | -3.21 | CAGGCAAGGCTGCAAGATTTAA | XM_044166: | XM_044166:                     |
| 93349  | LOC93349  | hypothetical protein BC004921                                              | 0.03  | ACACGTCAGAACCATGACAAA  | NM_138402: | NM_138402:                     |
| 93349  | LOC93349  | hypothetical protein BC004921                                              | -1.62 | CAGTTGTAATACAGATGCAAA  | NM_138402: | NM_138402:                     |
| 29931  | LOC93349  | loss of heterozygosity, 3, chromosomal region 2, gene A                    | 0.17  | CCCAAGATGTTTCATGTTGTA  | NM_013343: | NM_013343:                     |
| 29931  | LOC93349  | loss of heterozygosity, 3, chromosomal region 2, gene A                    | 1.33  | TTGGTATAACATTTGCTTGAAA | NM_013343: | NM_013343:                     |
| 29931  | LOC93349  | loss of heterozygosity, 3, chromosomal region 2, gene A                    | 0.31  | CCCAAGATGTTTCATGTTGTA  | NM_013343: | NM_013343:                     |
| 29931  | LOC93349  | loss of heterozygosity, 3, chromosomal region 2, gene A                    | 1.98  | TTGGTATAACATTTGCTTGAAA | NM_013343: | NM_013343:                     |
| 83752  | LOC93349  | peroxisomal LON protease like                                              | 0.99  | CGGGTATAGACATTACCTTA   | NM_031490: | NM_031490:                     |
| 83752  | LOC93349  | peroxisomal LON protease like                                              | 2.59  | CGGGATTTCTTGGATAATGA   | NM_031490: | NM_031490:                     |
| 91694  | LOC93349  | LON peptidase N-terminal domain and ring finger 1                          | 0.62  | TACTGTGCATCTATTCATAAA  | NM_152271: | NM_152271:                     |
| 91694  | LOC93349  | LON peptidase N-terminal domain and ring finger 1                          | 0.41  | ACGCATTGAATGTGTGCGAAA  | NM_152271: | NM_152271:                     |
| 164832 | LOC93349  | LON peptidase N-terminal domain and ring finger 2                          | -0.20 | CCGACGGATATTAGTCATCAT  | NM_198461: | NM_198461:                     |
| 164832 | LOC93349  | LON peptidase N-terminal domain and ring finger 2                          | 0.57  | CTGCATGAGATTGCTCTTTGA  | NM_198461: | NM_198461:                     |
| 79836  | LOC93349  | LON peptidase N-terminal domain and ring finger 3                          | 0.21  | CAGAGAGAAATGGAGTAGAAA  | NM_024778: | NM_024778:NM_001031855:        |
| 79836  | LOC93349  | LON peptidase N-terminal domain and ring finger 3                          | -0.32 | TTGCTCAAAATTCCTCTAAA   | NM_024778: | NM_024778:NM_001031855:        |
| 4014   | LOC93349  | loricrin                                                                   | 0.32  | CTCAGTCAATAAATTTGCAAA  | NM_000427: | NM_000427:                     |
| 4014   | LOC93349  | loricrin                                                                   | 0.33  | CCCAAGTGCCTCAGTCAATAAA | NM_000427: | NM_000427:                     |
| 4015   | LOC93349  | lysyl oxidase                                                              | 0.26  | CTGGAACCTTTAGTAAACATA  | NM_002317: | NM_002317:                     |
| 4015   | LOC93349  | lysyl oxidase                                                              | 0.14  | CTGCACAATTTCCCGTATTA   | NM_002317: | NM_002317:                     |
| 4017   | LOC93349  | lysyl oxidase-like 2                                                       | -2.25 | CCAGTCTATTATAGTCACATA  | NM_002318: | NM_002318:                     |
| 4017   | LOC93349  | lysyl oxidase-like 2                                                       | -3.16 | CCGGAGTTGGCTGCTCAGAAA  | NM_002318: | NM_002318:                     |
| 84695  | LOC93349  | lysyl oxidase-like 3                                                       | -1.20 | CAACGAGGAGTTTGAACGCTA  | NM_032603: | NM_032603:                     |
| 84695  | LOC93349  | lysyl oxidase-like 3                                                       | -1.94 | CAACAATGCAATGAAATGTA   | NM_032603: | NM_032603:                     |
| 84171  | LOC93349  | lysyl oxidase-like 4                                                       | -0.46 | CTCATTATGGACTGCTACAAA  | NM_032211: | NM_032211:                     |
| 84171  | LOC93349  | lysyl oxidase-like 4                                                       | -2.66 | CAGGATTTGGTCAAACTTCAA  | NM_032211: | NM_032211:                     |
| 4018   | LOC93349  | lipoprotein, Lp(a)                                                         | 0.10  | AACCACAGAAATCACTCCAAA  | NM_005577: | NM_005577:                     |
| 80350  | LOC93349  | lipoprotein, Lp(a)-like 2                                                  | 0.14  | CCCAAGTCAAAATCTTCTTCTA | NM_024492: | NM_024492:                     |
| 80350  | LOC93349  | lipoprotein, Lp(a)-like 2                                                  | 0.01  | AACCACTCACCTTGTCTGAAA  | NM_024492: | NM_024492:                     |
| 22859  | LOC93349  | latrophilin 1                                                              | -0.31 | CGAGATTTGAACTTCTCTATA  | NM_014921: | NM_014921:NM_001008701:        |
| 22859  | LOC93349  | latrophilin 1                                                              | -0.32 | CTGGCTCCGAGTGGCAATTA   | NM_014921: | NM_014921:NM_001008701:        |
| 23266  | LOC93349  | latrophilin 2                                                              | 0.62  | CCCTATCGTACCGATACCTTA  | NM_012302: | NM_012302:                     |
| 23266  | LOC93349  | latrophilin 2                                                              | -0.23 | TACATTTAATACCCGATTA    | NM_012302: | NM_012302:                     |
| 23284  | LOC93349  | latrophilin 3                                                              | 1.07  | AAGCTAAACATGGCATATCAA  | NM_015236: | NM_015236:                     |
| 23284  | LOC93349  | latrophilin 3                                                              | -1.54 | CAGGAACATAGGTTATCAA    | NM_015236: | NM_015236:                     |
| 4023   | LOC93349  | lipoprotein lipase                                                         | -1.44 | CCAGGCTGCAATTAACCTAAA  | NM_000237: | NM_000237:                     |
| 4023   | LOC93349  | lipoprotein lipase                                                         | 0.86  | CAGAATGCTCTTCTACGTATA  | NM_000237: | NM_000237:                     |
| 4025   | LOC93349  | lactoperoxidase                                                            | 1.40  | CTCGGAATCACTGCCAAATAA  | NM_006151: | NM_006151:                     |

|        |               |                                                                           |       |                        |               |               |
|--------|---------------|---------------------------------------------------------------------------|-------|------------------------|---------------|---------------|
| 4025   | LPO           | lactoperoxidase                                                           | -1.56 | CAGCACATTAGAAGTGCTCAA  | NM_006151:    | NM_006151:    |
| 64748  | LPPR2         | lipid phosphate phosphatase-related protein type 2                        | 0.41  | CCCGTGTCTAAGCATGTGCAA  | NM_022737:    | NM_022737:    |
| 64748  | LPPR2         | lipid phosphate phosphatase-related protein type 2                        | -3.54 | CCGGGCAACTTCAGCCCTTA   | NM_022737:    | NM_022737:    |
| 9404   | LPXN          | leupaxin                                                                  | 1.27  | ATGACTAGGCTGATAATCTTA  | NM_004811:    | NM_004811:    |
| 9404   | LPXN          | leupaxin                                                                  | 1.20  | CTGCTTAATAGCTTATAGAA   | NM_004811:    | NM_004811:    |
| 28959  | LR8           | LR8 protein                                                               | -0.58 | GAGGAAGTTTCCACAGCAAT   | NM_014020:    | NM_014020:    |
| 28959  | LR8           | LR8 protein                                                               | 0.08  | CTGATTAACATAATAAACAA   | NM_014020:    | NM_014020:    |
| 64167  | LRAP          | leukocyte-derived arginine aminopeptidase                                 | 0.50  | AAGCGTACCTTCTCAGTAT    | NM_022350:    | NM_022350:    |
| 64167  | LRAP          | leukocyte-derived arginine aminopeptidase                                 | -1.28 | ATGGATGGGACCAACTCATT   | NM_022350:    | NM_022350:    |
| 9227   | LRAT          | lecithin retinol acyltransferase (phosphatidylcholine--retinol O-acyltran | -8.59 | AAGTTTGTAGGAAGAGTCA    | NM_004744:    | NM_004744:    |
| 9227   | LRAT          | lecithin retinol acyltransferase (phosphatidylcholine--retinol O-acyltran | 0.82  | CCAGTAGACATAATTGTATTA  | NM_004744:    | NM_004744:    |
| 4034   | LRCH4         | leucine-rich repeats and calponin homology (CH) domain containing 4       | 0.68  | GCTGGTTGTGTGACAATAAA   | NM_002319:    | NM_002319:    |
| 4034   | LRCH4         | leucine-rich repeats and calponin homology (CH) domain containing 4       | -0.61 | CAGCGTTGATAGTGGCAGCAA  | NM_002319:    | NM_002319:    |
| 55367  | LRDD          | leucine-rich repeats and death domain containing                          | -4.46 | CCGGCTGAGCTTGGACCTGTA  | NM_018494:    | NM_018494:    |
| 55367  | LRDD          | leucine-rich repeats and death domain containing                          | 0.53  | CAGAATCTGCTTTGTCTTCTA  | NM_018494:    | NM_018494:    |
| 4035   | LRP1          | low density lipoprotein-related protein 1 (alpha-2-macroglobulin recept   | -3.40 | CCGCCGGATGTATAAATGTAA  | NM_002332:    | NM_002332:    |
| 4035   | LRP1          | low density lipoprotein-related protein 1 (alpha-2-macroglobulin recept   | 0.33  | CCGGAGTGGTATTCGTGTATA  | NM_002332:    | NM_002332:    |
| 26020  | LRP10         | low density lipoprotein receptor-related protein 10                       | -0.26 | CACCGAATGCCAATTAACATA  | NM_014045:    | NM_014045:    |
| 26020  | LRP10         | low density lipoprotein receptor-related protein 10                       | 2.43  | ACCCTATGTAGCTGTATAAAA  | NM_014045:    | NM_014045:    |
| 29967  | LRP12         | low density lipoprotein-related protein 12                                | 0.69  | TAGGCAGAGTTCGATAAATTA  | NM_013437:    | NM_013437:    |
| 29967  | LRP12         | low density lipoprotein-related protein 12                                | -1.96 | TAGGACGATCAAGTCCCTTAA  | NM_013437:    | NM_013437:    |
| 53353  | LRP1B         | low density lipoprotein-related protein 1B (deleted in tumors)            | -2.04 | TAGATGATTCATGTAAGTTAA  | NM_018557:    | NM_018557:    |
| 53353  | LRP1B         | low density lipoprotein-related protein 1B (deleted in tumors)            | -2.83 | CCCTACTACTCTGTTGAGCAA  | NM_018557:    | NM_018557:    |
| 4036   | LRP2          | low density lipoprotein-related protein 2                                 | 0.34  | CCGAAGTGATGGCTACGTTTA  | NM_004525:    | NM_004525:    |
| 4036   | LRP2          | low density lipoprotein-related protein 2                                 | -1.74 | CTCGGTTTGATTAACATTGAAA | NM_004525:    | NM_004525:    |
| 4037   | LRP3 (low de  | low density lipoprotein receptor-related protein 3                        | -0.09 | CCGCTTTGTAACCGAGGGAATA | NM_002333:    | NM_002333:    |
| 4037   | LRP3 (low de  | low density lipoprotein receptor-related protein 3                        | -0.04 | CGCGCTGGGCTGCCGCTTCAA  | NM_002333:    | NM_002333:    |
| 4038   | LRP4          | low density lipoprotein receptor-related protein 4                        | -2.32 | CAGGAAATCATTCGCAACAAA  | XM_035037:    | NM_002334:    |
| 4038   | LRP4          | low density lipoprotein receptor-related protein 4                        | -1.05 | CCGCAAGTACTGATCAACAAA  | XM_035037:    | NM_002334:    |
| 4041   | LRP5          | low density lipoprotein receptor-related protein 5                        | -2.24 | CAGGCTGGGAGAACTTTGTA   | NM_002335:    | NM_002335:    |
| 4041   | LRP5          | low density lipoprotein receptor-related protein 5                        | 0.11  | CCGTTCCGCTCAGCAGTAA    | NM_002335:    | NM_002335:    |
| 91355  | LRP5L         | low density lipoprotein receptor-related protein 5-like                   | -0.43 | CTGGAACAATCAGTGAACAAA  | NM_182492:    | NM_182492:    |
| 91355  | LRP5L         | low density lipoprotein receptor-related protein 5-like                   | -0.17 | CACGTGAGCCTATATGGGAAA  | NM_182492:    | NM_182492:    |
| 4040   | LRP6          | low density lipoprotein receptor-related protein 6                        | 0.38  | CTGGCTTTATGATACCAAAA   | NM_002336:    | NM_002336:    |
| 4040   | LRP6          | low density lipoprotein receptor-related protein 6                        | -0.02 | CGGATTAAGTTTCTAATTTA   | NM_002336:    | NM_002336:    |
| 7804   | LRP8          | low density lipoprotein receptor-related protein 8, apolipoprotein e reci | 0.12  | CAGTACCTTACTCATCATTTA  | NM_017522:    | NM_033300:    |
| 7804   | LRP8          | low density lipoprotein receptor-related protein 8, apolipoprotein e reci | -1.36 | CGGGATGGTGTAGCTGGGAT   | NM_017522:    | NM_001031692: |
| 4043   | LRPAP1        | low density lipoprotein receptor-related protein associated protein 1     | 0.66  | CGGGAGTTCCTGCATCACAAA  | NM_002337:    | NM_002337:    |
| 4043   | LRPAP1        | low density lipoprotein receptor-related protein associated protein 1     | 0.53  | TACCATGCACAGAGTCTTAA   | NM_002337:    | NM_002337:    |
| 10128  | LRPPRC        | leucine-rich PPR-motif containing                                         | 0.53  | GTGAAATGTGAAACAGTAAA   | XM_376585:    | NM_133259:    |
| 10234  | LRRC17        | leucine rich repeat containing 17                                         | 0.23  | CCGCTGTGACGTGTACACATA  | NM_005824:    | NM_001031692: |
| 10234  | LRRC17        | leucine rich repeat containing 17                                         | 0.26  | AAGGAACAATGGACCCGAAA   | NM_005824:    | NM_001031692: |
| 79442  | LRRC2 (leuci  | leucine rich repeat containing 2                                          | 0.64  | CTGGAGCTATATAAATCTCT   | NM_024512:    | NM_024750:    |
| 79442  | LRRC2 (leuci  | leucine rich repeat containing 2                                          | 0.61  | AAGACCAAACTACTGAAGTTAA | NM_024512:    | NM_024512:    |
| 127495 | LRRC39        | leucine rich repeat containing 39                                         | -0.16 | CTGGCTGTAAACAGAGATATA  | NM_144620:    | NM_144620:    |
| 127495 | LRRC39        | leucine rich repeat containing 39                                         | -1.84 | CTCAGCAACAATAAAGTGCAA  | NM_144620:    | NM_144620:    |
| 64101  | LRRC4         | leucine rich repeat containing 4                                          | 0.33  | AAGCTGTGAGATCCACAGTAA  | NM_022143:    | NM_022143:    |
| 64101  | LRRC4         | leucine rich repeat containing 4                                          | -2.25 | CAGAAGGGATTTCTGTGTATA  | NM_022143:    | NM_022143:    |
| 55631  | LRRC40        | leucine rich repeat containing 40                                         | 0.83  | CTCAGTACACATTTCAACTTA  | NM_017768:    | NM_017768:    |
| 55631  | LRRC40        | leucine rich repeat containing 40                                         | 0.49  | TCGGTAATTTGTAAACTTAA   | NM_017768:    | NM_017768:    |
| 57470  | LRRC47        | leucine rich repeat containing 47                                         | -0.01 | ATGTAGATACATGGCAGGTAA  | NM_020710:    | NM_020710:    |
| 57470  | LRRC47        | leucine rich repeat containing 47                                         | 1.73  | CCGCTTTGTTGGCCGGTTT    | NM_020710:    | NM_020710:    |
| 94030  | LRRC4B        | leucine rich repeat containing 4B                                         | -9.35 | ACCGGTACCTGAACCTGCAG   | XM_292778:    | XM_292778:    |
| 94030  | LRRC4B        | leucine rich repeat containing 4B                                         | -0.64 | CACCGGAGCATGAACATTGA   | XM_292778:    | XM_292778:    |
| 57689  | LRRC4C        | leucine rich repeat containing 4C                                         | 0.15  | CCGAATGAACTCTAAAGCAAA  | NM_020929:    | NM_020929:    |
| 57689  | LRRC4C        | leucine rich repeat containing 4C                                         | -0.02 | AAGGACTGTTGAAATTTATTA  | NM_020929:    | NM_020929:    |
| 255252 | LRRC57        | leucine rich repeat containing 57                                         | -0.18 | ACCGCCTTTGOTGATAGGAAA  | NM_153260:    | NM_153260:    |
| 255252 | LRRC57        | leucine rich repeat containing 57                                         | -1.36 | AACCAAACTACATCAATAA    | NM_153260:    | NM_153260:    |
| 116064 | LRRC58 (leuc  | leucine rich repeat containing 58                                         | 0.12  | CACGGACCATTAAAGATTGCAA | XM_057296:    | XM_057296:    |
| 116064 | LRRC58 (leuc  | leucine rich repeat containing 58                                         | 0.35  | TTGATATTATGTGACAAACAAA | XM_057296:    | XM_057296:    |
| 79705  | LRRK1         | leucine-rich repeat kinase 1                                              | 0.02  | CCCTGTTTGTGACATAAT     | NM_024652:    | NM_024652:    |
| 79705  | LRRK1         | leucine-rich repeat kinase 1                                              | -0.36 | CCGAGTCAATGGCGCTTAAA   | NM_024652:    | NM_024652:    |
| 120892 | LRRK2         | leucine-rich repeat kinase 2                                              | 0.06  | ATCGAAATGCATATCATATA   | XM_058513:    | XM_058513:    |
| 120892 | LRRK2         | leucine-rich repeat kinase 2                                              | 0.02  | CTGCTGCACTATACGTGTAA   | XM_058513:    | XM_058513:    |
| 57633  | LRRN1         | leucine rich repeat neuronal 1                                            | 1.38  | AAGACTTTGCTTGAATGTTTA  | NM_020873:    | NM_020873:    |
| 57633  | LRRN1         | leucine rich repeat neuronal 1                                            | -3.86 | CTGTTTGTCTTACACCCAA    | NM_020873:    | NM_020873:    |
| 10446  | LRRN5         | leucine rich repeat neuronal 5                                            | -1.18 | AAGCATATTGAGGAGGGCAA   | NM_006338:    | NM_006338:    |
| 10446  | LRRN5         | leucine rich repeat neuronal 5                                            | -1.08 | CAAGTGGACATCAGCAATAA   | NM_006338:    | NM_006338:    |
| 84894  | LRRN6A        | leucine rich repeat neuronal 6A                                           | -0.93 | CAAGGGGAACACAAAGCACAA  | NM_032808:    | NM_032808:    |
| 84894  | LRRN6A        | leucine rich repeat neuronal 6A                                           | 0.20  | AAGGACTTCCCTGATGTGCTA  | NM_032808:    | NM_032808:    |
| 158038 | LRRN6C        | leucine rich repeat neuronal 6C                                           | -1.75 | ACCCAGGAGTTCAACATGAA   | NM_152570:    | NM_152570:    |
| 158038 | LRRN6C        | leucine rich repeat neuronal 6C                                           | 1.58  | AAGGCGTTTCAACACCCAAA   | NM_152570:    | NM_152570:    |
| 339398 | LRRN6D        | leucine rich repeat neuronal 6D                                           | 0.13  | AGCGCTAGTCAAGTCTTAA    | NM_001004432: | NM_001004432: |
| 339398 | LRRN6D        | leucine rich repeat neuronal 6D                                           | -0.12 | CACCGCTATAAGATTATTTTCA | NM_001004432: | NM_001004432: |
| 90678  | LRSAM1        | leucine rich repeat and sterile alpha motif containing 1                  | -8.96 | CCGAAGCAGGAGTGTCAATAA  | NM_138361:    | NM_001005374: |
| 90678  | LRSAM1        | leucine rich repeat and sterile alpha motif containing 1                  | -0.04 | CTGGAGAAACTCGAGTTGAAA  | NM_138361:    | NM_001005374: |
| 51599  | LSR           | lipolysis stimulated lipoprotein receptor                                 | -0.07 | CGGGACGACCTTATGACCAAA  | NM_015925:    | NM_205834:    |
| 51599  | LSR           | lipolysis stimulated lipoprotein receptor                                 | 0.15  | GAGGATTAACATCACCAGAAA  | NM_015925:    | NM_205834:    |
| 4047   | LSS           | lanosterol synthase (2,3-oxidosqualene-lanosterol cyclase)                | 0.61  | ATGAGCATCTGCCTTAATAAA  | NM_002340:    | NM_002340:    |
| 4047   | LSS           | lanosterol synthase (2,3-oxidosqualene-lanosterol cyclase)                | 0.33  | CAGGTAGTGTGCATCCGTGAA  | NM_002340:    | NM_002340:    |
| 4049   | LTA           | lymphotoxin alpha (TNF superfamily, member 1)                             | -4.02 | ACCTCGATGAAGCCCAATAA   | NM_000595:    | NM_000595:    |
| 4049   | LTA           | lymphotoxin alpha (TNF superfamily, member 1)                             | 0.50  | CCGGAGCTTTGAAAGAGGAAA  | NM_000595:    | NM_000595:    |
| 4048   | LTA4H (leuko  | leukotriene A4 hydrolase                                                  | 0.54  | CGCAATTCCTTTGGCGCTCAA  | NM_000895:    | NM_000895:    |
| 4048   | LTA4H (leuko  | leukotriene A4 hydrolase                                                  | 0.12  | GCGGCTCCTGATCAATCCAA   | NM_000895:    | NM_000895:    |
| 4050   | LTB           | lymphotoxin beta (TNF superfamily, member 3)                              | -2.51 | CAGGATCAGGAGGAGCTGGTA  | NM_002341:    | NM_002341:    |
| 4050   | LTB           | lymphotoxin beta (TNF superfamily, member 3)                              | -1.78 | CCCGCAGGACGGCTCTATTA   | NM_002341:    | NM_009588:    |
| 22949  | LTB4DH        | leukotriene B4 12-hydroxydehydrogenase                                    | 1.31  | GGCCATTTAGATGATTAGTTA  | NM_012212:    | NM_012212:    |
| 22949  | LTB4DH        | leukotriene B4 12-hydroxydehydrogenase                                    | 0.99  | CCGCATTTATGGGAATGCTGA  | NM_012212:    | NM_012212:    |
| 1241   | LTB4R         | leukotriene B4 receptor                                                   | 0.56  | AAGGCCATGGTCAAGTTGAAA  | NM_181657:    | NM_181657:    |
| 1241   | LTB4R         | leukotriene B4 receptor                                                   | -0.76 | ACACTTCTAATTAATCTTAAA  | NM_181657:    | NM_181657:    |
| 56413  | LTB4R2        | leukotriene B4 receptor 2                                                 | -0.04 | AAGGCACTAAACATACTTTA   | NM_019839:    | NM_019839:    |
| 56413  | LTB4R2        | leukotriene B4 receptor 2                                                 | 0.26  | TAAGTACATCTCTCAATAAA   | NM_019839:    | NM_019839:    |
| 4052   | LTBP1 (latent | latent transforming growth factor beta binding protein 1                  | 0.03  | TACCGGTTATAAGCGGGTTA   | NM_000627:    | NM_000627:    |
| 4052   | LTBP1 (latent | latent transforming growth factor beta binding protein 1                  | -0.80 | TTGATTAATTTGGCATTTTAA  | NM_000627:    | NM_000627:    |
| 4053   | LTBP2         | latent transforming growth factor beta binding protein 2                  | 1.13  | TAGGAACCTAACCTTCAGATA  | NM_000428:    | NM_000428:    |
| 4053   | LTBP2         | latent transforming growth factor beta binding protein 2                  | 1.58  | CAGGATAAATCTTAGAACCAA  | NM_000428:    | NM_000428:    |
| 8425   | LTBP4         | latent transforming growth factor beta binding protein 4                  | 0.03  | TACGAGTACGGCCAGACTTA   | NM_003573:    | NM_003573:    |

|        |          |                                                                  |       |                         |            |                                                                                  |
|--------|----------|------------------------------------------------------------------|-------|-------------------------|------------|----------------------------------------------------------------------------------|
| 8425   | LTBP4    | latent transforming growth factor beta binding protein 4         | 0.79  | GCGGCTGGAGTGCATCGATAA   | NM_003573: | NM_003573:                                                                       |
| 4055   | LTBR     | lymphotoxin beta receptor (TNFR superfamily, member 3)           | -9.63 | CGCCACAGCGGTCACTGCATA   | NM_002342: | NM_002342:                                                                       |
| 4055   | LTBR     | lymphotoxin beta receptor (TNFR superfamily, member 3)           | 0.05  | CGCGCGGGTCTATGACTATCA   | NM_002342: | NM_002342:                                                                       |
| 4056   | LTC4S    | leukotriene C4 synthase                                          | 0.13  | ATCCTAGTCTCTATCATTA     | NM_000897: | NM_145867;NM_000897:                                                             |
| 4056   | LTC4S    | leukotriene C4 synthase                                          | 0.61  | AAAGTTCTAGTACCAGGAGAA   | NM_000897: | NM_145867;NM_000897:                                                             |
| 4057   | LTF      | lactotransferrin                                                 | 0.32  | AAGCAGTACCCGTGATCCTAA   | NM_002343: | NM_002343:                                                                       |
| 4057   | LTF      | lactotransferrin                                                 | -1.62 | CAGAGAGACACAGTGTGTA     | NM_002343: | NM_002343:                                                                       |
| 4058   | LTK      | leukocyte tyrosine kinase                                        | 1.23  | ACAGATCTTTGGAGTGCCTAA   | NM_002344: | NM_206961;NM_002344:                                                             |
| 4058   | LTK      | leukocyte tyrosine kinase                                        | 0.41  | CCTGCAGATGCTTCTAATAAA   | NM_002344: | NM_206961;NM_002344:                                                             |
| 51213  | LUZP4    | leucine zipper protein 4                                         | -0.56 | CTAGACGACATTAATCTAT     | NM_016383: | NM_016383:                                                                       |
| 51213  | LUZP4    | leucine zipper protein 4                                         | -0.06 | CTGGTAGTAAGCTAATCTAA    | NM_016383: | NM_016383:                                                                       |
| 92335  | LYK5     | protein kinase LYK5                                              | 0.30  | CACCCAGATGCTGCTAGAGAA   | NM_153335: | NM_001003786;NM_001003787;NM_153335;NM_01003788:                                 |
| 92335  | LYK5     | protein kinase LYK5                                              | 0.04  | CTGGTTCTAGTCTGCTGCTA    | NM_153335: | NM_153335:                                                                       |
| 4066   | LYL1     | (lymph lymphoblastic leukemia derived sequence 1                 | -0.12 | TGGCAGAGCAGTCATAGGAAA   | NM_005583: | NM_005583:                                                                       |
| 4066   | LYL1     | (lymph lymphoblastic leukemia derived sequence 1                 | -4.51 | CCGCCTAGCCATGAAGTACAT   | NM_005583: | NM_005583:                                                                       |
| 4067   | LYN      | v-yes-1 Yamaguchi sarcoma viral related oncogene homolog         | -0.01 | CCGGACGACTTGTCTTTCAA    | NM_002350: | NM_002350:                                                                       |
| 4067   | LYN      | v-yes-1 Yamaguchi sarcoma viral related oncogene homolog         | 0.13  | CGGGAATATGGGATGTATAA    | NM_002350: | NM_002350:                                                                       |
| 66004  | LYNX1    | LY6/neurotoxin 1                                                 | 0.51  | AAGATAATTAATTAATGAA     | NM_023946: | NM_177457;NM_023946:                                                             |
| 66004  | LYNX1    | LY6/neurotoxin 1                                                 | 0.48  | TTCAAAGTTATGTAAGATAA    | NM_023946: | NM_177457;NM_023946:                                                             |
| 116372 | LYPD1    | LY6/PLAUR domain containing 1                                    | 0.23  | CACGGTGAACGTTCAAGACAT   | NM_144586: | NM_144586:                                                                       |
| 116372 | LYPD1    | LY6/PLAUR domain containing 1                                    | -0.83 | CACAAGCAAGAGAGAAATTTAA  | NM_144586: | NM_144586:                                                                       |
| 27076  | LYPD3    | LY6/PLAUR domain containing 3                                    | 0.14  | ACCGTTGTATATATTCGGCA    | NM_014400: | NM_014400:                                                                       |
| 27076  | LYPD3    | LY6/PLAUR domain containing 3                                    | -1.90 | CACCAGGACCCGAGCAATCCA   | NM_014400: | NM_014400:                                                                       |
| 284348 | LYPD5    | LY6/PLAUR domain containing 5                                    | -1.65 | CCCAATAAGCAGTATGCCCTA   | NM_182573: | NM_001031749;NM_182573:                                                          |
| 284348 | LYPD5    | LY6/PLAUR domain containing 5                                    | 0.20  | CAGCAGTGGCCAGTATAAAT    | NM_182573: | NM_182573:                                                                       |
| 1130   | LYST     | lysosomal trafficking regulator                                  | 1.08  | CAAGGTGTTAATAAATCTATA   | NM_000081: | NM_000081:                                                                       |
| 1130   | LYST     | lysosomal trafficking regulator                                  | 0.79  | CACCGCGACCTGATTACCTAA   | NM_000081: | NM_000081:                                                                       |
| 4069   | LZ       | LYZ (lysozym lysozyme (renal amyloidosis)                        | 1.46  | TACGATTATGCCCAATATTA    | NM_000239: | NM_000239:                                                                       |
| 4069   | LZ       | LYZ (lysozym lysozyme (renal amyloidosis)                        | 0.72  | TAACCCAGACTTAATCTGGAA   | NM_000239: | NM_000239:                                                                       |
| 11178  | LZTS1    | leucine zipper, putative tumor suppressor 1                      | -1.73 | CACCGTGGCACTAGAATGCAA   | NM_021020: | NM_021020:                                                                       |
| 11178  | LZTS1    | leucine zipper, putative tumor suppressor 1                      | 1.68  | TGGGTGACCACTCTCTTTAA    | NM_021020: | NM_021020:                                                                       |
| 84445  | LZTS2    | leucine zipper, putative tumor suppressor 2                      | -2.27 | CGGATGTGCGCTGCCACATT    | NM_032429: | NM_032429:                                                                       |
| 84445  | LZTS2    | leucine zipper, putative tumor suppressor 2                      | -1.07 | GAGCAAGATCAGACCGCTCAA   | NM_032429: | NM_032429:                                                                       |
| 4074   | M6PR     | mannose-6-phosphate receptor (cation dependent)                  | -0.29 | TTGACTCTTCTCACTAGTAAA   | NM_002355: | NM_002355:                                                                       |
| 4074   | M6PR     | mannose-6-phosphate receptor (cation dependent)                  | 0.44  | ACAGTTGTAAGTCAGAGTTAA   | NM_002355: | NM_002355:                                                                       |
| 10226  | M6PRBP1  | mannose-6-phosphate receptor binding protein 1                   | 0.06  | CTGGTATTCAGTATTGCCTTA   | NM_005817: | NM_005817:                                                                       |
| 10226  | M6PRBP1  | mannose-6-phosphate receptor binding protein 1                   | 0.31  | AGGGATATAGTCAATATCCCA   | NM_005817: | NM_005817:                                                                       |
| 8379   | MAD1L1   | MAD1 mitotic arrest deficient-like 1 (yeast)                     | 0.28  | CAGCGATTGTGAAGAACATGA   | NM_003550: | NM_001013836;NM_003550;NM_001013837:                                             |
| 8379   | MAD1L1   | MAD1 mitotic arrest deficient-like 1 (yeast)                     | -5.59 | CAGCGCACTGCCTCATCTCAA   | NM_003550: | NM_001013836;NM_001013837;NM_003550:                                             |
| 4085   | MAD2L1   | MAD2 mitotic arrest deficient-like 1 (yeast)                     | -0.13 | ATGGATATTTGACTGTTTAA    | NM_002358: | NM_002358:                                                                       |
| 4085   | MAD2L1   | MAD2 mitotic arrest deficient-like 1 (yeast)                     | 0.11  | CTGAAGTAACCTATAATCTA    | NM_002358: | NM_002358:                                                                       |
| 9587   | MAD2L1BP | MAD2L1 binding protein                                           | 0.98  | CGAGCCATATTCATGCGTGA    | NM_014628: | NM_014628;NM_001003690:                                                          |
| 9587   | MAD2L1BP | MAD2L1 binding protein                                           | 1.00  | GAGGAGATGCTGAAGAAGAAA   | NM_014628: | NM_014628;NM_001003690:                                                          |
| 10459  | MAD2L2   | MAD2 mitotic arrest deficient-like 2 (yeast)                     | -2.95 | CCCGTGGGCATCTCCAGAAA    | NM_006341: | NM_006341:                                                                       |
| 10459  | MAD2L2   | MAD2 mitotic arrest deficient-like 2 (yeast)                     | 0.74  | GTGGAAGAGCGGCTCATAAA    | NM_006341: | NM_006341:                                                                       |
| 8567   | MADD     | MAP-kinase activating death domain                               | 1.30  | CAGACCCACTACTATAGTAAA   | NM_003682: | NM_130470;NM_003682;NM_130476;NM_130475;NM_130474;NM_130473;NM_130472;NM_130471: |
| 8567   | MADD     | MAP-kinase activating death domain                               | -1.17 | CAGGAGGGCGTTAGTGGATCA   | NM_003682: | NM_130470;NM_003682;NM_130476;NM_130475;NM_130474;NM_130473;NM_130472;NM_130471: |
| 10296  | MAEA     | macrophage erythroblast attachor                                 | 1.89  | TAGAGTCTAATTGCTATCCAT   | NM_005882: | NM_001017405;NM_005882:                                                          |
| 10296  | MAEA     | macrophage erythroblast attachor                                 | 1.59  | TTCCATAACTGTAGAGTCTAA   | NM_005882: | NM_001017405;NM_005882:                                                          |
| 4094   | MAF      | v-maf musculoaponeurotic fibrosarcoma oncogene homolog (avian)   | 0.25  | GAGGATCTCCCGAGCCTGAA    | NM_005360: | NM_005360;NM_001031804:                                                          |
| 4094   | MAF      | v-maf musculoaponeurotic fibrosarcoma oncogene homolog (avian)   | 1.10  | GGCGAGAAGCATGAAGTGTTA   | NM_005360: | NM_005360;NM_001031804:                                                          |
| 389692 | MAFA     | v-maf musculoaponeurotic fibrosarcoma oncogene homolog A (avian) | -0.63 | CACGGCCGACTTCTCTCTGTA   | NM_201589: | NM_201589:                                                                       |
| 389692 | MAFA     | v-maf musculoaponeurotic fibrosarcoma oncogene homolog A (avian) | 1.26  | CCTGATGAAGTTCGAGGTGAA   | NM_201589: | NM_201589:                                                                       |
| 9935   | MAFB     | v-maf musculoaponeurotic fibrosarcoma oncogene homolog B (avian) | -0.17 | ACGCCAGTCTTCGAGGTATA    | NM_005461: | NM_005461:                                                                       |
| 9935   | MAFB     | v-maf musculoaponeurotic fibrosarcoma oncogene homolog B (avian) | -1.51 | CAGCCTTGTCTTATGGTCAAA   | NM_005461: | NM_005461:                                                                       |
| 23764  | MAFF     | v-maf musculoaponeurotic fibrosarcoma oncogene homolog F (avian) | 0.20  | AAGCCGGAGAGCAACAACAAA   | NM_012323: | NM_012323;NM_152878:                                                             |
| 23764  | MAFF     | v-maf musculoaponeurotic fibrosarcoma oncogene homolog F (avian) | 0.04  | CAGCAAGCTCTAAGAATCAA    | NM_012323: | NM_012323;NM_152878:                                                             |
| 4097   | MAFG     | v-maf musculoaponeurotic fibrosarcoma oncogene homolog G (avian) | 0.04  | ATGGAGTTTAAAGAATCTA     | NM_002359: | NM_002359;NM_032711:                                                             |
| 4097   | MAFG     | v-maf musculoaponeurotic fibrosarcoma oncogene homolog G (avian) | -1.65 | CAGCGTATCACAAATAGTAAA   | NM_002359: | NM_002359;NM_032711:                                                             |
| 7975   | MAFK     | v-maf musculoaponeurotic fibrosarcoma oncogene homolog K (avian) | 0.62  | CAAACCGAATAAGGCATTA     | NM_002360: | NM_002360:                                                                       |
| 7975   | MAFK     | v-maf musculoaponeurotic fibrosarcoma oncogene homolog K (avian) | -0.78 | TGCCCGGGTTATGACGACTAA   | NM_002360: | NM_002360:                                                                       |
| 4099   | MAG      | myelin associated glycoprotein                                   | -0.12 | ATCGCGCAATGTGACCGTGAA   | NM_080600: | NM_002361;NM_080600:                                                             |
| 4099   | MAG      | myelin associated glycoprotein                                   | 1.19  | CCCGGTGATTGTGGAGATGAA   | NM_080600: | NM_002361;NM_080600:                                                             |
| 9500   | MAGED1   | melanoma antigen family D, 1                                     | 1.46  | CGCAGATTAATAACTTGAA     | NM_006986: | NM_001005333;NM_001005332;NM_006986:                                             |
| 9500   | MAGED1   | melanoma antigen family D, 1                                     | -0.50 | CTCCTGGAGATCTAAGGAAA    | NM_006986: | NM_001005333;NM_001005332;NM_006986:                                             |
| 9863   | MAGI2    | membrane associated guanylate kinase, WW and PDZ domain contain  | -0.24 | ACGCAGTGAAGTCCGCAACCTA  | NM_012301: | NM_012301:                                                                       |
| 9863   | MAGI2    | membrane associated guanylate kinase, WW and PDZ domain contain  | 1.07  | TTGGATGTCAATCCAACTTTA   | NM_012301: | NM_012301:                                                                       |
| 260425 | MAGI3    | membrane associated guanylate kinase, WW and PDZ domain contain  | -3.21 | CCCTATGATGTTGCTTGCACA   | NM_020965: | NM_020965;NM_152900:                                                             |
| 260425 | MAGI3    | membrane associated guanylate kinase, WW and PDZ domain contain  | -1.83 | CGGGATGTGCAAGACGCTGAAA  | NM_020965: | NM_020965:                                                                       |
| 4117   | MAK      | male germ cell-associated kinase                                 | 0.35  | CACAGTGTGATATATGGGTA    | NM_005906: | NM_005906:                                                                       |
| 4117   | MAK      | male germ cell-associated kinase                                 | 1.54  | CGGATATAATCGATCAGGTT    | NM_005906: | NM_005906:                                                                       |
| 10892  | MALT1    | mucosa associated lymphoid tissue lymphoma translocation gene 1  | -0.23 | CACAGTGTGATATATGGGTA    | NM_006785: | NM_173844;NM_006785:                                                             |
| 10892  | MALT1    | mucosa associated lymphoid tissue lymphoma translocation gene 1  | 0.49  | CTGGTAATCCCAAGTAAATGTTA | NM_006785: | NM_173844;NM_006785:                                                             |
| 161357 | MAMDC1   | MAM domain containing 1                                          | 1.18  | ACCCCTGAGTGTACTTGTCTA   | NM_182830: | NM_182830:                                                                       |
| 161357 | MAMDC1   | MAM domain containing 1                                          | -4.02 | CAGGCTGAACAACAAGTCTTA   | NM_182830: | NM_182830:                                                                       |
| 158056 | MAMDC4   | MAM domain containing 4                                          | -0.28 | CTCCACCTGGCTTATTATTTA   | NM_206920: | NM_206920:                                                                       |
| 158056 | MAMDC4   | MAM domain containing 4                                          | 0.22  | CAGGCTGCAGGCTCAGGATA    | NM_206920: | NM_206920:                                                                       |
| 84441  | MAML2    | mastermind-like 2 (Drosophila)                                   | 0.86  | CAGGATACAGTATCCAAATTA   | NM_032427: | NM_032427:                                                                       |
| 84441  | MAML2    | mastermind-like 2 (Drosophila)                                   | -6.39 | CAGAGTCAATTTCCAGCTCAA   | NM_032427: | NM_032427:                                                                       |
| 4124   | MAN2A1   | mannosidase, alpha, class 2A, member 1                           | -1.96 | TACCACATACAGGGAATGAA    | NM_002372: | NM_002372:                                                                       |
| 4124   | MAN2A1   | mannosidase, alpha, class 2A, member 1                           | 0.11  | CGGAATGGGATTTACAGTTTA   | NM_002372: | NM_002372:                                                                       |
| 4122   | MAN2A2   | mannosidase, alpha, class 2A, member 2                           | -0.10 | TAAGAGTATTTCTGAAGTCAA   | NM_006122: | NM_006122:                                                                       |
| 4122   | MAN2A2   | mannosidase, alpha, class 2A, member 2                           | -0.65 | AAAGGTATTTCTGTAAGATTTA  | NM_006122: | NM_006122:                                                                       |
| 4125   | MAN2B1   | mannosidase, alpha, class 2B, member 1                           | -0.02 | GCGGAGTATCGGAGCCACTAA   | NM_000528: | NM_000528:                                                                       |
| 4125   | MAN2B1   | mannosidase, alpha, class 2B, member 1                           | 0.01  | TCGACCACCTGGAAACCTGAA   | NM_000528: | NM_000528:                                                                       |
| 23324  | MAN2B2   | mannosidase, alpha, class 2B, member 2                           | 0.88  | GGGGTCTTTCTGGAAGATGA    | NM_015274: | NM_015274:                                                                       |
| 23324  | MAN2B2   | mannosidase, alpha, class 2B, member 2                           | 0.88  | CACGGGTTTCTCTATGAACA    | NM_015274: | NM_015274:                                                                       |
| 4123   | MAN2C1   | mannosidase, alpha, class 2C, member 1                           | 0.41  | CAGGATGCTGGCGTTATCCAA   | NM_006715: | NM_006715:                                                                       |
| 4123   | MAN2C1   | mannosidase, alpha, class 2C, member 1                           | -2.59 | CTCGCTCTTGGGGGCGCTAA    | NM_006715: | NM_006715:                                                                       |
| 4128   | MAOA     | (mono monoamine oxidase A                                        | -0.40 | CAGATGTGCTAGACACGAAA    | NM_000240: | NM_000240:                                                                       |
| 4128   | MAOA     | (mono monoamine oxidase A                                        | -7.28 | ACCCCTGGTGTGAGACATAAA   | NM_000240: | NM_000240:                                                                       |
| 4129   | MAOB     | monoamine oxidase B                                              | -1.40 | AAGAGTTGCAGTAAAGTTCCA   | NM_000898: | NM_000898:                                                                       |
| 4129   | MAOB     | monoamine oxidase B                                              | 0.30  | GGCATGAAGATTCACCTCAA    | NM_000898: | NM_000898:                                                                       |
| 4130   | MAP1A    | microtubule-associated protein 1A                                | 0.03  | CTCGTGGTGTACCAACAAA     | NM_002373: | NM_002373:                                                                       |

|        |           |                                                                        |       |                         |            |                                          |
|--------|-----------|------------------------------------------------------------------------|-------|-------------------------|------------|------------------------------------------|
| 4130   | MAP1A     | microtubule-associated protein 1A                                      | -0.01 | CGGAGGACACGGTCGCTGAA    | NM_002373: | NM_002373:                               |
| 254042 | MAP1D     | methionine aminopeptidase 1D                                           | 0.80  | CGGAAATCATGCATGATAAT    | NM_199227: | NM_199227:                               |
| 254042 | MAP1D     | methionine aminopeptidase 1D                                           | 1.39  | TCCGCAGAGGTTCTCATAGAA   | NM_199227: | NM_199227:                               |
| 4133   | MAP2      | microtubule-associated protein 2                                       | 2.49  | CTCGAATATTATACTTCTTA    | NM_031845: | NM_031845:NM_002374:NM_031847:NM_031846: |
| 4133   | MAP2      | microtubule-associated protein 2                                       | -0.20 | CTGGATAATTATATCAGAGTA   | NM_031845: | NM_031845:NM_002374:NM_031847:NM_031846: |
| 5604   | MAP2K1    | mitogen-activated protein kinase kinase 1                              | -0.76 | CTGGAAAGAAATTCCTGAACAAA | NM_002755: | NM_002755:                               |
| 5604   | MAP2K1    | mitogen-activated protein kinase kinase 1                              | -4.30 | CTGGATCAAGTCTGAAGAAA    | NM_002755: | NM_002755:                               |
| 8649   | MAP2K1IP1 | mitogen-activated protein kinase kinase 1 interacting protein 1        | -2.18 | ATGCCAGGCTTGCAGAATAA    | NM_021970: | NM_021970:                               |
| 8649   | MAP2K1IP1 | mitogen-activated protein kinase kinase 1 interacting protein 1        | 0.68  | TAGCATATAGATGTAATTTAT   | NM_021970: | NM_021970:                               |
| 5605   | MAP2K2    | mitogen-activated protein kinase kinase 2                              | 0.43  | CAGCATTGCGATGGAACACAT   | NM_030662: | NM_030662:                               |
| 5605   | MAP2K2    | mitogen-activated protein kinase kinase 2                              | -1.77 | CCGGCTCGCCATGGCCATCTT   | NM_030662: | NM_030662:                               |
| 5606   | MAP2K3    | mitogen-activated protein kinase kinase 3                              | 0.36  | ACGGATATCCCTGATGTCCAA   | NM_002756: | NM_145110:NM_145109:NM_002756:           |
| 5606   | MAP2K3    | mitogen-activated protein kinase kinase 3                              | -2.93 | CCGGCCACCCGTGAACCTACA   | NM_002756: | NM_145110:NM_145109:NM_002756:           |
| 6416   | MAP2K4    | mitogen-activated protein kinase kinase 4                              | 0.20  | AGGGAGAATGGTGCTTTTAA    | NM_003010: | NM_003010:                               |
| 6416   | MAP2K4    | mitogen-activated protein kinase kinase 4                              | -0.65 | AGGGTGATAGTTCACAAA      | NM_003010: | NM_003010:                               |
| 5607   | MAP2K5    | mitogen-activated protein kinase kinase 5                              | -0.01 | AAGCGTATGTTGGAACAAAT    | NM_002757: | NM_002757:NM_145162:NM_145160:NM_145161: |
| 5607   | MAP2K5    | mitogen-activated protein kinase kinase 5                              | -0.08 | CAAGCGTATGTTGGAACAAA    | NM_002757: | NM_002757:NM_145162:NM_145160:NM_145161: |
| 5608   | MAP2K6    | mitogen-activated protein kinase kinase 6                              | 0.01  | AAGGCTTGCATTTCTATTGGA   | NM_002758: | NM_031988:NM_002758:                     |
| 5608   | MAP2K6    | mitogen-activated protein kinase kinase 6                              | -0.36 | TAGACCTATGATAAATAACCA   | NM_002758: | NM_031988:NM_002758:                     |
| 5609   | MAP2K7    | mitogen-activated protein kinase kinase 7                              | -3.78 | CCGGCCGAGGATCGACCTCAA   | NM_145185: | NM_145185:                               |
| 4214   | MAP3K1    | mitogen-activated protein kinase kinase kinase 1                       | -0.35 | CACGCATGCAAAATTCATCA    | XM_042066: | XM_042066:                               |
| 4214   | MAP3K1    | mitogen-activated protein kinase kinase kinase 1                       | -3.83 | CTCCGGGTGTTCAACTAGAA    | XM_042066: | XM_042066:                               |
| 4294   | MAP3K10   | mitogen-activated protein kinase kinase kinase 10                      | 0.20  | AAGCGGCTTGAAGTCATCGAA   | NM_002446: | NM_002446:                               |
| 4294   | MAP3K10   | mitogen-activated protein kinase kinase kinase 10                      | 2.54  | CAGGATGTTCACTCTATTTAT   | NM_002446: | NM_002446:                               |
| 4296   | MAP3K11   | mitogen-activated protein kinase kinase kinase 11                      | -0.16 | CCCGACGTGCGAGGACTCAA    | NM_002419: | NM_002419:                               |
| 4296   | MAP3K11   | mitogen-activated protein kinase kinase kinase 11                      | -5.56 | CCGGAGGAGAAACGCTTCCGA   | NM_002419: | NM_002419:                               |
| 7786   | MAP3K12   | mitogen-activated protein kinase kinase kinase 12                      | 0.02  | CAGGAGCACATGAAAGGAA     | NM_006301: | NM_006301:                               |
| 7786   | MAP3K12   | mitogen-activated protein kinase kinase kinase 12                      | 0.77  | CTCGTATTCCTGTACATAGA    | NM_006301: | NM_006301:                               |
| 9175   | MAP3K13   | mitogen-activated protein kinase kinase kinase 13                      | -0.47 | CAGACTCAATATGCACGGACA   | NM_004721: | NM_004721:                               |
| 9175   | MAP3K13   | mitogen-activated protein kinase kinase kinase 13                      | -0.89 | GCGAATAATTTATACATGGAA   | NM_004721: | NM_004721:                               |
| 9020   | MAP3K14   | mitogen-activated protein kinase kinase kinase 14                      | 0.04  | CACATGCATGTGACTCCTCAA   | NM_003954: | NM_003954:                               |
| 9020   | MAP3K14   | mitogen-activated protein kinase kinase kinase 14                      | -6.46 | TACCTAGTGCATGCTCTGCAA   | NM_003954: | NM_003954:                               |
| 389840 | MAP3K15   | mitogen-activated protein kinase kinase kinase 15                      | -0.37 | GCCGATCAGCAATAACATTTAA  | XM_372199: | XM_372199:                               |
| 389840 | MAP3K15   | mitogen-activated protein kinase kinase kinase 15                      | 0.58  | CTGATGTTGCTGGAACAACA    | XM_372199: | NM_001001671:                            |
| 10746  | MAP3K2    | mitogen-activated protein kinase kinase kinase 2                       | -0.16 | CACAGTAATATGATTGTCCCTA  | NM_006609: | NM_006609:                               |
| 10746  | MAP3K2    | mitogen-activated protein kinase kinase kinase 2                       | -0.04 | CAGAATGATGTCGGAGTCAA    | NM_006609: | NM_006609:                               |
| 4215   | MAP3K3    | mitogen-activated protein kinase kinase kinase 3                       | -1.21 | CAGGAATACTCAGATCGGGAA   | NM_002401: | NM_203351:NM_002401:                     |
| 4215   | MAP3K3    | mitogen-activated protein kinase kinase kinase 3                       | 1.21  | CCACGTGCTGTGCCACCACAA   | NM_002401: | NM_203351:NM_002401:                     |
| 4216   | MAP3K4    | mitogen-activated protein kinase kinase kinase 4                       | -1.36 | CACCAATCCCTGAAAGATTA    | NM_005922: | NM_005922:NM_006724:                     |
| 4216   | MAP3K4    | mitogen-activated protein kinase kinase kinase 4                       | 0.23  | CTCAAGCATCGCATAGTTTAA   | NM_005922: | NM_005922:NM_006724:                     |
| 4217   | MAP3K5    | mitogen-activated protein kinase kinase kinase 5                       | 0.02  | CAGCGAGTAGATAATTCGAA    | NM_005923: | NM_005923:                               |
| 4217   | MAP3K5    | mitogen-activated protein kinase kinase kinase 5                       | -3.75 | CCGGAAATCTATACTCAATGA   | NM_005923: | NM_005923:                               |
| 9064   | MAP3K6    | mitogen-activated protein kinase kinase kinase 6                       | 0.53  | CACCATCCAATGCTGTGTTAA   | NM_004672: | NM_004672:                               |
| 9064   | MAP3K6    | mitogen-activated protein kinase kinase kinase 6                       | 0.09  | TCAGAGGAGCTGAGTAATGAA   | NM_004672: | NM_004672:                               |
| 6885   | MAP3K7    | mitogen-activated protein kinase kinase kinase 7                       | 1.52  | CAAGAATATGAAAGTCAA      | NM_003188: | NM_145331:NM_003188:                     |
| 6885   | MAP3K7    | mitogen-activated protein kinase kinase kinase 7                       | 1.29  | CCCGTGTGAACCATCTAATA    | NM_003188: | NM_145333:NM_145331:NM_145332:NM_003188: |
| 10454  | MAP3K7IP1 | mitogen-activated protein kinase kinase kinase 7 interacting protein 1 | -1.82 | CACCTTGGACAAGCCACACAA   | NM_006116: | NM_006116:                               |
| 10454  | MAP3K7IP1 | mitogen-activated protein kinase kinase kinase 7 interacting protein 1 | 0.68  | CTGCAAGTGAGAGATTAAAA    | NM_006116: | NM_006116:                               |
| 23118  | MAP3K7IP2 | mitogen-activated protein kinase kinase kinase 7 interacting protein 2 | -4.09 | CAGTCAATAGCCAGACCTTAA   | NM_015093: | NM_145342:NM_015093:                     |
| 23118  | MAP3K7IP2 | mitogen-activated protein kinase kinase kinase 7 interacting protein 2 | 0.92  | TGGCTGGGTATCTCAGTTTAA   | NM_015093: | NM_145342:NM_015093:                     |
| 1326   | MAP3K8    | mitogen-activated protein kinase kinase kinase 8                       | -1.42 | AAGAAAGTGATCCATCATGAT   | NM_005204: | NM_005204:                               |
| 1326   | MAP3K8    | mitogen-activated protein kinase kinase kinase 8                       | -1.83 | AGAGATTGATTTATTAATTTAA  | NM_005204: | NM_005204:                               |
| 4293   | MAP3K9    | mitogen-activated protein kinase kinase kinase 9                       | 0.62  | AGCGATGAAATGTGCTGTAT    | XM_027237: | NM_033141:                               |
| 4293   | MAP3K9    | mitogen-activated protein kinase kinase kinase 9                       | 2.15  | CAGCGATGAAATGTGCTGTAT   | XM_027237: | NM_033141:                               |
| 11184  | MAP4K1    | mitogen-activated protein kinase kinase kinase kinase 1                | -0.01 | CTGACTAAGAGTCCCAAGAAA   | NM_007181: | NM_007181:                               |
| 11184  | MAP4K1    | mitogen-activated protein kinase kinase kinase kinase 1                | -0.42 | TACGTGGGTGTACTCCATCAA   | NM_007181: | NM_007181:                               |
| 5871   | MAP4K2    | mitogen-activated protein kinase kinase kinase kinase 2                | -0.37 | CTGGCTCTACTGCGTGAACAA   | NM_004579: | NM_004579:                               |
| 5871   | MAP4K2    | mitogen-activated protein kinase kinase kinase kinase 2                | -1.25 | TCGGTCAAGCTCAGAAATCCA   | NM_004579: | NM_004579:                               |
| 8491   | MAP4K3    | mitogen-activated protein kinase kinase kinase kinase 3                | -0.10 | GAGGTGCTTCTTACAGGATA    | NM_003618: | NM_003618:                               |
| 8491   | MAP4K3    | mitogen-activated protein kinase kinase kinase kinase 3                | 3.57  | TCGAGCTGTGGATAAAGTAA    | NM_003618: | NM_003618:                               |
| 9448   | MAP4K4    | mitogen-activated protein kinase kinase kinase kinase 4                | 0.94  | AACATTAATGTTTAAATTTAA   | NM_004834: | NM_145686:NM_004834:NM_145687:           |
| 9448   | MAP4K4    | mitogen-activated protein kinase kinase kinase kinase 4                | 0.02  | AGCAAGATGCTACCCTGGAAA   | NM_004834: | NM_145686:NM_004834:NM_145687:           |
| 11183  | MAP4K5    | mitogen-activated protein kinase kinase kinase kinase 5                | 0.34  | CTTGCCTATTGCATACTAAA    | NM_006575: | NM_006575:NM_198794:                     |
| 11183  | MAP4K5    | mitogen-activated protein kinase kinase kinase kinase 5                | -0.08 | TCCGCTTATTAGGATCAGACA   | NM_006575: | NM_006575:NM_198794:                     |
| 9053   | MAP7      | microtubule-associated protein 7                                       | 0.37  | CAGGCATATGGCTTTTAGTAA   | NM_003980: | NM_003980:                               |
| 9053   | MAP7      | microtubule-associated protein 7                                       | -0.34 | GTGCTCCTTCTTGAACAATCAA  | NM_003980: | NM_003980:                               |
| 5594   | MAPK1     | mitogen-activated protein kinase 1                                     | 0.40  | AACACTTGTCAAGAAGCGTTA   | NM_002745: | NM_002745:                               |
| 5594   | MAPK1     | mitogen-activated protein kinase 1                                     | 0.77  | ATCATGGTAGTCACTAACATA   | NM_002745: | NM_002745:                               |
| 5602   | MAPK10    | mitogen-activated protein kinase 10                                    | 0.09  | CGCATGTGCTGATTCATA      | NM_002753: | NM_138980:NM_002753:NM_138981:NM_138982: |
| 5602   | MAPK10    | mitogen-activated protein kinase 10                                    | 0.49  | TCCGAGCAAAATAACTCAA     | NM_002753: | NM_138980:NM_002753:NM_138981:NM_138982: |
| 5600   | MAPK11    | mitogen-activated protein kinase 11                                    | 0.08  | CAGGATGGAGCTGATCCAGTA   | NM_002751: | NM_002751:                               |
| 5600   | MAPK11    | mitogen-activated protein kinase 11                                    | -0.52 | CTGAGCGACGACGCTTCAA     | NM_002751: | NM_002751:NM_138993:                     |
| 6300   | MAPK12    | mitogen-activated protein kinase 12                                    | -0.22 | CTGACGATTAATCACTCCTGAT  | NM_002969: | NM_002969:                               |
| 6300   | MAPK12    | mitogen-activated protein kinase 12                                    | 0.72  | TGGAAGCGTGTACTTACAAA    | NM_002969: | NM_002969:                               |
| 5603   | MAPK13    | mitogen-activated protein kinase 13                                    | -0.01 | CCGGAGTGGCATGAAGCTGTA   | NM_002754: | NM_002754:                               |
| 5603   | MAPK13    | mitogen-activated protein kinase 13                                    | -0.94 | CGGGATGAGCCTCATCCGGAA   | NM_002754: | NM_002754:                               |
| 1432   | MAPK14    | mitogen-activated protein kinase 14                                    | -3.42 | AAGGCTCCTGGAGGAATTCAA   | NM_001315: | NM_001315:NM_139012:NM_139013:NM_139014: |
| 1432   | MAPK14    | mitogen-activated protein kinase 14                                    | 0.45  | CACACAGATGATGAAATGACA   | NM_001315: | NM_001315:NM_139012:NM_139013:NM_139014: |
| 225689 | MAPK15    | mitogen-activated protein kinase 15                                    | -1.10 | CCCCTGACTTCCCTCAATAA    | NM_139021: | NM_139021:                               |
| 225689 | MAPK15    | mitogen-activated protein kinase 15                                    | -3.73 | CCCAGAGAACATCCGGGAAA    | NM_139021: | NM_139021:                               |
| 5595   | MAPK3     | mitogen-activated protein kinase 3                                     | 0.65  | CCCGTCTAATATATAAATATA   | NM_002746: | NM_002746:                               |
| 5595   | MAPK3     | mitogen-activated protein kinase 3                                     | -1.43 | CTCCCTGACCCGCTAATATA    | NM_002746: | NM_002746:                               |
| 5596   | MAPK4     | mitogen-activated protein kinase 4                                     | 0.00  | AAGGATCGTGTATCAGCATA    | NM_002747: | NM_002747:                               |
| 5596   | MAPK4     | mitogen-activated protein kinase 4                                     | -2.21 | CGCCTTAAATCTAATCAGCAA   | NM_002747: | NM_002747:                               |
| 5597   | MAPK6     | mitogen-activated protein kinase 6                                     | 0.27  | CAAGTTCAATTTGAAAGGAAA   | NM_002748: | NM_002748:                               |
| 5597   | MAPK6     | mitogen-activated protein kinase 6                                     | -0.28 | CAGGCTTCCGTGTTGAAATAAA  | NM_002748: | NM_002748:                               |
| 5598   | MAPK7     | mitogen-activated protein kinase 7                                     | -0.52 | CAGACCACCTTTCAGCCTTA    | NM_002749: | NM_139033:NM_139034:NM_002749:NM_139032: |
| 5598   | MAPK7     | mitogen-activated protein kinase 7                                     | -3.92 | CAGGAGCGGGAGCGAAAGGAA   | NM_002749: | NM_139033:NM_139034:NM_002749:NM_139032: |

|        |          |                                                                      |         |                        |            |                                                              |
|--------|----------|----------------------------------------------------------------------|---------|------------------------|------------|--------------------------------------------------------------|
| 5599   | MAPK8    | mitogen-activated protein kinase 8                                   | 0.02    | AAGCAGTTAGATGAAAGGGAA  | NM_002750: | NM_002750:NM_139047:NM_139049:NM_139046:                     |
| 5599   | MAPK8    | mitogen-activated protein kinase 8                                   | -2.46   | AAGCCAGTAATATAGTAGTA   | NM_002750: | NM_002750:NM_139047:NM_139049:NM_139046:                     |
| 9479   | MAPK8IP1 | mitogen-activated protein kinase 8 interacting protein 1             | -2.50   | CTGGAGGAGTTGAGGATGAA   | NM_005456: | NM_005456:                                                   |
| 9479   | MAPK8IP1 | mitogen-activated protein kinase 8 interacting protein 1             | 0.61    | TGGCATCAGCTTACAGTGCAA  | NM_005456: | NM_005456:                                                   |
| 23542  | MAPK8IP2 | mitogen-activated protein kinase 8 interacting protein 2             | 0.01    | ACAGGTAATGTCGGCTTCCAA  | NM_012324: | NM_012324:NM_139124:NM_016431:                               |
| 23542  | MAPK8IP2 | mitogen-activated protein kinase 8 interacting protein 2             | 0.66    | CTGGAGAAATTTGACGACGAA  | NM_012324: | NM_012324:NM_139124:                                         |
| 23162  | MAPK8IP3 | mitogen-activated protein kinase 8 interacting protein 3             | -5.73   | CAGCCGCAACATGGAAGTACA  | NM_015133: | NM_015133:                                                   |
| 23162  | MAPK8IP3 | mitogen-activated protein kinase 8 interacting protein 3             | -0.01   | GACGAGTGGTCTGATGTTCAA  | NM_015133: | NM_033392:NM_015133:                                         |
| 5601   | MAPK9    | mitogen-activated protein kinase 9                                   | -0.01   | AAAGTGGATTTATGTGTATTA  | NM_002752: | NM_002752:NM_139068:NM_139069:NM_139070:                     |
| 5601   | MAPK9    | mitogen-activated protein kinase 9                                   | 0.12    | ATCGTGAACCTGTCTCTTAA   | NM_002752: | NM_002752:NM_139068:NM_139069:NM_139070:                     |
| 79109  | MAPKAP1  | mitogen-activated protein kinase associated protein 1                | -0.98   | CTAGGTATCTCTGGAGACAAA  | NM_024117: | NM_01006621:NM_024117:NM_001006617:NM_01006620:              |
| 79109  | MAPKAP1  | mitogen-activated protein kinase associated protein 1                | 0.00    | GACCTGTTCAGAAATCAGAAA  | NM_024117: | NM_001006621:NM_001006619:NM_024117:NM_01006617:NM_01006620: |
| 9261   | MAPKAPK2 | mitogen-activated protein kinase-activated protein kinase 2          | -1.75   | CGCCATCATCGTACTACAAA   | NM_004759: | NM_032960:NM_004759:                                         |
| 9261   | MAPKAPK2 | mitogen-activated protein kinase-activated protein kinase 2          | 1.12    | CTAGGACGAGATCAAGATAAA  | NM_004759: | NM_004759:                                                   |
| 7867   | MAPKAPK3 | mitogen-activated protein kinase-activated protein kinase 3          | -0.02   | CAGGCTTCACTGAGAGAGAAA  | NM_004635: | NM_004635:                                                   |
| 7867   | MAPKAPK3 | mitogen-activated protein kinase-activated protein kinase 3          | 0.66    | CCAGATAGTAATAAACACCAT  | NM_004635: | NM_004635:                                                   |
| 8550   | MAPKAPK5 | mitogen-activated protein kinase-activated protein kinase 5          | 0.87    | ACCGACCTTTCTGATTAGTAA  | NM_003668: | NM_003668:NM_139078:                                         |
| 8550   | MAPKAPK5 | mitogen-activated protein kinase-activated protein kinase 5          | 0.61    | CCGACCTTTCTGATTAGTAA   | NM_003668: | NM_003668:NM_139078:                                         |
| 23005  | MAPKBP1  | (m) mitogen activated protein kinase binding protein 1               | 1.06    | CAGGACCGAAATATTGGGATA  | XM_031706: | XM_031706:                                                   |
| 23005  | MAPKBP1  | (m) mitogen activated protein kinase binding protein 1               | 0.88    | CCCGTTTGTACTGATGATGA   | XM_031706: | XM_031706:                                                   |
| 22919  | MAPRE1   | microtubule-associated protein, RP/EB family, member 1               | 0.63    | ACCAATTCATCCAGCTAAA    | NM_012325: | NM_012325:                                                   |
| 22919  | MAPRE1   | microtubule-associated protein, RP/EB family, member 1               | -2.40   | CAGAGCAACATCGGAATCTTT  | NM_012325: | NM_012325:                                                   |
| 10982  | MAPRE2   | microtubule-associated protein, RP/EB family, member 2               | -1.18   | CAGCAGTGCAGCTAATCAA    | NM_014268: | NM_014268:                                                   |
| 10982  | MAPRE2   | microtubule-associated protein, RP/EB family, member 2               | -0.01   | GACCTTATTAATGAGGACATA  | NM_014268: | NM_014268:                                                   |
| 4137   | MAPT     | microtubule-associated protein tau                                   | -5.94   | CGCCAGGAGTTCGAAGTGAT   | NM_016835: | NM_016841:NM_016835:NM_016834:NM_005910:                     |
| 4137   | MAPT     | microtubule-associated protein tau                                   | -0.26   | TTAGGCAACATCCATCATAAA  | NM_016835: | NM_016841:NM_016835:NM_016834:NM_005910:                     |
| 55016  | MARCH1   | membrane-associated ring finger (C3HC4) 1                            | 1.92    | TAGGCAGTAATCAAGATTAA   | NM_017923: | NM_017923:                                                   |
| 55016  | MARCH1   | membrane-associated ring finger (C3HC4) 1                            | 0.52    | AAGAATCTTCATGTAATGTA   | NM_017923: | NM_017923:                                                   |
| 51257  | MARCH2   | membrane-associated ring finger (C3HC4) 2                            | -0.32   | CTCCGAGTGGAGAAAGACCAA  | NM_016496: | NM_016496:                                                   |
| 51257  | MARCH2   | membrane-associated ring finger (C3HC4) 2                            | -3.06   | ACGGAGTTTGAGTGGAGAAA   | NM_016496: | NM_001005415:NM_001005416:NM_016496:                         |
| 115123 | MARCH3   | membrane-associated ring finger (C3HC4) 3                            | 1.03    | CACAGTGAAGTGTATTATTTAA | NM_178450: | NM_178450:                                                   |
| 115123 | MARCH3   | membrane-associated ring finger (C3HC4) 3                            | 0.75    | CAGGTTTGGAGTGGAGCGCAA  | NM_178450: | NM_178450:                                                   |
| 220972 | MARCH8   | membrane-associated ring finger (C3HC4) 8                            | -2.18   | TGGATGCTAAATGGCAATTA   | NM_145021: | NM_145021:NM_001002265:NM_001002266:                         |
| 220972 | MARCH8   | membrane-associated ring finger (C3HC4) 8                            | -4.51   | TGGAAATTAGTGGATGCTAAA  | NM_145021: | NM_145021:NM_001002265:NM_001002266:                         |
| 4082   | MARCKS   | myristoylated alanine-rich protein kinase C substrate                | -2.63   | CTCCCTCAAGAAGAACAGAA   | NM_002356: | NM_002356:                                                   |
| 4082   | MARCKS   | myristoylated alanine-rich protein kinase C substrate                | 0.41    | TTGAGTTTTTTTGGAGAAA    | NM_002356: | NM_002356:                                                   |
| 8685   | MARCO    | macrophage receptor with collagenous structure                       | -0.93   | CTGAAGTTTACTACAGTGGTA  | NM_006770: | NM_006770:                                                   |
| 8685   | MARCO    | macrophage receptor with collagenous structure                       | -1.01   | CAGGATTCGGCAGTAGTAA    | NM_006770: | NM_006770:                                                   |
| 4139   | MARK1    | MAP/microtubule affinity-regulating kinase 1                         | -1.8650 | CCCGGTGTAAGAACTCCATTA  | NM_018650: | NM_018650:                                                   |
| 4139   | MARK1    | MAP/microtubule affinity-regulating kinase 1                         | -0.95   | CGCGCCAGTAGTACTTAA     | NM_018650: | NM_018650:                                                   |
| 2011   | MARK2    | MAP/microtubule affinity-regulating kinase 2                         | -0.40   | CACCTCTAATCTTACTCTAA   | NM_004954: | NM_004954:NM_017490:                                         |
| 2011   | MARK2    | MAP/microtubule affinity-regulating kinase 2                         | 0.29    | AGCCCAACGAGCTGAAGCTTTA | NM_004954: | NM_004954:NM_017490:                                         |
| 4140   | MARK3    | MAP/microtubule affinity-regulating kinase 3                         | -0.20   | AACGGCGAACCCGCAACATATA | NM_002376: | NM_002376:                                                   |
| 4140   | MARK3    | MAP/microtubule affinity-regulating kinase 3                         | 0.68    | CCCGGGAACCGGCAACCCGAA  | NM_002376: | NM_002376:                                                   |
| 57787  | MARK4    | MAP/microtubule affinity-regulating kinase 4                         | -2.32   | CGCCATCATGAAGGCCTAAA   | NM_031417: | NM_031417:                                                   |
| 57787  | MARK4    | MAP/microtubule affinity-regulating kinase 4                         | -0.05   | CTGCAGCCTGTTGCCAATAA   | NM_031417: | NM_031417:                                                   |
| 4141   | MARS     | methionine-tRNA synthetase                                           | 0.15    | CTGCACATGGCAACCAATATA  | NM_004990: | NM_004990:                                                   |
| 4141   | MARS     | methionine-tRNA synthetase                                           | 0.47    | TAGGAGCTGAGGATAACTATA  | NM_004990: | NM_004990:                                                   |
| 92935  | MARS2    | methionine-tRNA synthetase 2 (mitochondrial)                         | 0.49    | CCCAACCATTTTCATCACGTA  | NM_138395: | NM_138395:                                                   |
| 92935  | MARS2    | methionine-tRNA synthetase 2 (mitochondrial)                         | 2.09    | CAGGATCTTTAATACAATATA  | NM_138395: | NM_138395:                                                   |
| 91862  | MARVELD3 | MARVEL domain containing 3                                           | -10.63  | CAGGCGCTGTACCAAAAGCAAA | NM_052858: | NM_052858:                                                   |
| 91862  | MARVELD3 | MARVEL domain containing 3                                           | -4.54   | CTGGGAGAGCCTGCTGCCAAA  | NM_052858: | NM_052858:                                                   |
| 4142   | MAS1     | MAS1 oncogene                                                        | -6.70   | AAGTATCTCCTAATGTGATA   | NM_002377: | NM_002377:                                                   |
| 4142   | MAS1     | MAS1 oncogene                                                        | -0.03   | ACAGTTGAGACTGCTGCTAA   | NM_002377: | NM_002377:                                                   |
| 116511 | MAS1L    | MAS1 oncogene-like                                                   | 0.16    | AGGGTCGATGTGGAACATAA   | NM_052967: | NM_052967:                                                   |
| 116511 | MAS1L    | MAS1 oncogene-like                                                   | 1.12    | CACGAATCCCTACATGGTATA  | NM_052967: | NM_052967:                                                   |
| 5648   | MASP1    | mannan-binding lectin serine peptidase 1 (C4/C2 activating componer) | 0.97    | CAGGCAAGCAAGCTCTCTTA   | NM_001879: | NM_001879:                                                   |
| 5648   | MASP1    | mannan-binding lectin serine peptidase 1 (C4/C2 activating componer) | 0.01    | CCGCTACGAGTATACTCTTA   | NM_001879: | NM_001879:                                                   |
| 10747  | MASP2    | mannan-binding lectin serine peptidase 2                             | -0.02   | CTGGTGTTCATAGATAGTAA   | NM_006610: | NM_006610:                                                   |
| 10747  | MASP2    | mannan-binding lectin serine peptidase 2                             | 0.55    | TACCGATTGTGACCATCAAA   | NM_006610: | NM_006610:                                                   |
| 84059  | MASS1    | monogenic, audiogenic seizure susceptibility 1 homolog (mouse)       | -0.65   | CACGGGAGTACTAGAATTTAA  | NM_032119: | NM_032119:                                                   |
| 84059  | MASS1    | monogenic, audiogenic seizure susceptibility 1 homolog (mouse)       | -0.96   | CAGATGGTTTTCTGTTGCAA   | NM_032119: | NM_032119:                                                   |
| 23139  | MAST2    | microtubule associated serine/threonine kinase 2                     | -2.58   | CAGGAGTGTGCTGTCTGGCAA  | NM_015112: | NM_015112:                                                   |
| 23139  | MAST2    | microtubule associated serine/threonine kinase 2                     | 0.31    | CAGTAAATAAATGATGAA     | NM_015112: | NM_015112:                                                   |
| 23031  | MAST3    | microtubule associated serine/threonine kinase 3                     | 0.18    | CACGGAGAAAGCCATGCGAAA  | XM_038150: | XM_038150:                                                   |
| 23031  | MAST3    | microtubule associated serine/threonine kinase 3                     | 0.07    | TTCTTGTGTTTACAAGACTA   | XM_038150: | XM_038150:                                                   |
| 84930  | MASTL    | microtubule associated serine/threonine kinase-like                  | 0.13    | ACGCCTTATTAGCAAATTA    | NM_032844: | NM_032844:                                                   |
| 84930  | MASTL    | microtubule associated serine/threonine kinase-like                  | 0.54    | CAGGACAAGTGTATCGCTTA   | NM_032844: | NM_032844:                                                   |
| 4143   | MAT1A    | methionine adenosyltransferase 1, alpha                              | -2.68   | TTGTATGAAACTAAAGCTTTA  | NM_000429: | NM_000429:                                                   |
| 4143   | MAT1A    | methionine adenosyltransferase 1, alpha                              | 0.87    | TTGGCTCACACTGCACATGAA  | NM_000429: | NM_000429:                                                   |
| 4145   | MATK     | megakaryocyte-associated tyrosine kinase                             | 0.88    | ACGGATTTCTAAGGACTCTAAA | NM_002378: | NM_002378:NM_139354:NM_139355:                               |
| 4145   | MATK     | megakaryocyte-associated tyrosine kinase                             | 2.04    | GACGGATTTCTAAGGACTCTAA | NM_002378: | NM_002378:NM_139354:NM_139355:                               |
| 4148   | MATN3    | matrilin 3                                                           | -0.10   | TTGGTAGGAAATAGAATGAAA  | NM_002381: | NM_002381:                                                   |
| 4148   | MATN3    | matrilin 3                                                           | 0.01    | AAGGTCAGCTGGTATCTTCAA  | NM_002381: | NM_002381:                                                   |
| 4149   | MAX      | MYC associated factor X                                              | 0.17    | CGGTGTGATTTCTAAGAAAT   | NM_002382: | NM_145113:NM_002382:NM_145112:                               |
| 4149   | MAX      | MYC associated factor X                                              | 0.88    | CGGTTTGGAGTAATCAGAAAT  | NM_002382: | NM_002384:NM_015847:NM_015845:NM_015846:                     |
| 4152   | MBD1     | methyl-CpG binding domain protein 1                                  | 1.62    | AAGGATGATTCGCCTCCAAA   | NM_002384: | NM_015844:                                                   |
| 4152   | MBD1     | methyl-CpG binding domain protein 1                                  | -0.04   | CCGGGAACAGAGAATGTTTAA  | NM_002384: | NM_015844:                                                   |
| 8932   | MBD2     | methyl-CpG binding domain protein 2                                  | -2.04   | AAGATGATGCCTAGTAATAA   | NM_003927: | NM_015832:NM_003927:                                         |
| 8932   | MBD2     | methyl-CpG binding domain protein 2                                  | -1.52   | TGGAAGATGATGCCTAGTAA   | NM_003927: | NM_015832:NM_003927:                                         |
| 53615  | MBD3     | (methyl) methyl-CpG binding domain protein 3                         | 0.29    | CCCGGAGATGGAGCAGCTCTA  | NM_003926: | NM_003926:                                                   |
| 53615  | MBD3     | (methyl) methyl-CpG binding domain protein 3                         | 0.70    | GCCGGTGACCAAGATTACCAA  | NM_003926: | NM_003926:                                                   |
| 8930   | MBD4     | methyl-CpG binding domain protein 4                                  | -0.01   | AAGCTTCTCATCGTACTATA   | NM_003925: | NM_003925:                                                   |
| 8930   | MBD4     | methyl-CpG binding domain protein 4                                  | -0.87   | CCGCGAATGACCTCCGCAAA   | NM_003925: | NM_003925:                                                   |
| 4153   | MBL2     | mannose-binding lectin (protein C) 2, soluble (opsonic defect)       | -30.25  | CACATGAGCTATCAATCAA    | NM_000242: | NM_000242:                                                   |
| 4153   | MBL2     | mannose-binding lectin (protein C) 2, soluble (opsonic defect)       | 0.82    | TACGATGTTTGTAGAACCTCAA | NM_000242: | NM_000242:                                                   |
| 8720   | MBTPS1   | membrane-bound transcription factor peptidase, site 1                | -0.30   | CAGGATAATTTAAGGATGAA   | NM_003791: | NM_003791:                                                   |
| 8720   | MBTPS1   | membrane-bound transcription factor peptidase, site 1                | 1.43    | CAGAACAGACTTCAACAGTAA  | NM_003791: | NM_003791:                                                   |
| 51360  | MBTPS2   | membrane-bound transcription factor peptidase, site 2                | 0.45    | CAGCTATGGTAAATTCAT     | NM_015884: | NM_015884:                                                   |

|        |             |                                                                      |        |                        |               |                                                                        |
|--------|-------------|----------------------------------------------------------------------|--------|------------------------|---------------|------------------------------------------------------------------------|
| 51360  | MBTPS2      | membrane-bound transcription factor peptidase, site 2                | -0.69  | CTGAGTTACAGTATACAGCTA  | NM_015884:    | NM_015884:                                                             |
| 4157   | MC1R        | melanocortin 1 receptor (alpha melanocyte stimulating hormone recep  | 0.56   | CACCAGGGCTTTGGCCTTAAA  | NM_002386:    | NM_002386:                                                             |
| 4157   | MC1R        | melanocortin 1 receptor (alpha melanocyte stimulating hormone recep  | 0.84   | CACGCTCTTCATCGCCTACTA  | NM_002386:    | NM_002386:                                                             |
| 4158   | MC2R        | melanocortin 2 receptor (adrenocorticotrophic hormone)               | 0.11   | CAGCCTATATAAGATCTTGGA  | NM_000529:    | NM_000529:                                                             |
| 4158   | MC2R        | melanocortin 2 receptor (adrenocorticotrophic hormone)               | -0.51  | CCCGCTGATGCTGGTCTTCAT  | NM_000529:    | NM_000529:                                                             |
| 4159   | MC3R        | melanocortin 3 receptor                                              | -0.77  | CTGCTACACTGCCCACTTCAA  | NM_019888:    | NM_019888:                                                             |
| 4159   | MC3R        | melanocortin 3 receptor                                              | -1.85  | TGGCGTGGTTCATCGTCTA    | NM_019888:    | NM_019888:                                                             |
| 4160   | MC4R        | melanocortin 4 receptor                                              | 1.52   | AAGCGGGTTGGGATCATCATA  | NM_005912:    | NM_005912:                                                             |
| 4160   | MC4R        | melanocortin 4 receptor                                              | 0.37   | CCATAACATTATGACAGITAA  | NM_005912:    | NM_005912:                                                             |
| 4161   | MC5R (melan | melanocortin 5 receptor                                              | -2.16  | CGGCATTGTCTCATCCGTGA   | NM_005913:    | NM_005913:                                                             |
| 4161   | MC5R (melan | melanocortin 5 receptor                                              | -0.12  | CTGGGAGACCATCACCATCTA  | NM_005913:    | NM_005913:                                                             |
| 4162   | MCAM        | melanoma cell adhesion molecule                                      | -1.14  | AAGACCGAACTTGATGTTGAA  | NM_006500:    | NM_006500:                                                             |
| 4162   | MCAM        | melanoma cell adhesion molecule                                      | -0.61  | TACACACATTATGGCTGTAAA  | NM_006500:    | NM_006500:                                                             |
| 4163   | MCC         | mutated in colorectal cancers                                        | 1.08   | ACCAATGAAACTTCGCTTTAA  | NM_002387:    | NM_002387:                                                             |
| 4163   | MCC         | mutated in colorectal cancers                                        | 0.27   | CAGGACTGCTCCAATATCCAA  | NM_002387:    | NM_002387:                                                             |
| 56922  | MCCC1       | methylcrotonoyl-Coenzyme A carboxylase 1 (alpha)                     | -0.39  | ATGCATTTGGTCACTAATTA   | NM_020166:    | NM_020166:                                                             |
| 56922  | MCCC1       | methylcrotonoyl-Coenzyme A carboxylase 1 (alpha)                     | -3.28  | CATGGTTATGATGGCCATGAA  | NM_020166:    | NM_020166:                                                             |
| 64087  | MCCC2       | methylcrotonoyl-Coenzyme A carboxylase 2 (beta)                      | -0.01  | CCATAAAGCGGAGACAGTAA   | NM_022132:    | NM_022132:                                                             |
| 64087  | MCCC2       | methylcrotonoyl-Coenzyme A carboxylase 2 (beta)                      | -0.97  | ACCCCTACTATTCCACGCGCAA | NM_022132:    | NM_022132:                                                             |
| 199675 | MCEMP1      | mast cell-expressed membrane protein 1                               | 0.06   | CTCCCTGTTTGTGTAACAATA  | NM_174918:    | NM_174918:                                                             |
| 199675 | MCEMP1      | mast cell-expressed membrane protein 1                               | 0.26   | CAGAAAGGTGATGAATGAATA  | NM_174918:    | NM_174918:                                                             |
| 4168   | MCF2        | MCF.2 cell line derived transforming sequence                        | 1.52   | AGGGAAGTATAGCTCAAGTAAA | NM_005369:    | NM_005369:                                                             |
| 4168   | MCF2        | MCF.2 cell line derived transforming sequence                        | 0.31   | CACGCTAAATAAGAACTGATA  | NM_005369:    | NM_005369:                                                             |
| 55972  | MCFP        | mitochondrial carrier family protein                                 | 0.78   | CAGGCCTAAATTCCTCGCTTAA | NM_018843:    | NM_018843:                                                             |
| 55972  | MCFP        | mitochondrial carrier family protein                                 | 0.51   | AACCTGGATTATAATGAAGAA  | NM_018843:    | NM_018843:                                                             |
| 2847   | MCHR1       | melanin-concentrating hormone receptor 1                             | 0.14   | CCCAAGCTGGTGGAATAATGAA | NM_005297:    | NM_005297:                                                             |
| 2847   | MCHR1       | melanin-concentrating hormone receptor 1                             | -3.11  | CTAGGAGGCTGCTGTAAGTAA  | NM_005297:    | NM_005297:                                                             |
| 84539  | MCHR2       | melanin-concentrating hormone receptor 2                             | -2.77  | CACATAATAAGATCCAGGAA   | NM_032503:    | NM_032503:                                                             |
| 84539  | MCHR2       | melanin-concentrating hormone receptor 2                             | -3.91  | CTGGATTGGATGAAGTGCAA   | NM_032503:    | NM_032503:                                                             |
| 4170   | MCL1        | myeloid cell leukemia sequence 1 (BCL2-related)                      | -10.22 | CCCGCCGAATTCATTAATTTA  | NM_021960:    | NM_182763;NM_021960:                                                   |
| 4170   | MCL1        | myeloid cell leukemia sequence 1 (BCL2-related)                      | -2.81  | CTGGTTGGCATATCTAATAA   | NM_021960:    | NM_182763;NM_021960:                                                   |
| 4171   | MCM2        | MCM2 minichromosome maintenance deficient 2, mitotin (S. cerevisia   | -1.00  | CTCATTGGAGATGGCATGGAA  | NM_004526:    | NM_004526:                                                             |
| 4171   | MCM2        | MCM2 minichromosome maintenance deficient 2, mitotin (S. cerevisia   | 0.97   | GAGGCCATGCCATCCATAA    | NM_004526:    | NM_004526:                                                             |
| 4172   | MCM3        | MCM3 minichromosome maintenance deficient 3 (S. cerevisiae)          | -0.15  | CACGTTTGAATGCTCTTCAA   | NM_002388:    | NM_002388:                                                             |
| 4172   | MCM3        | MCM3 minichromosome maintenance deficient 3 (S. cerevisiae)          | 0.37   | CGGCAGGATGACCCAGTATAA  | NM_002388:    | NM_002388:                                                             |
| 57192  | MCOLN1      | mucopolip 1                                                          | -0.09  | GTGCCTGTTCTCGCTCATCAA  | NM_020533:    | NM_020533:                                                             |
| 57192  | MCOLN1      | mucopolip 1                                                          | 0.89   | CTGATCACGTTTGCACAACAAA | NM_020533:    | NM_020533:                                                             |
| 255231 | MCOLN2      | mucopolip 2                                                          | -0.39  | TACGATTACTTTGACAATAA   | NM_153259:    | NM_153259:                                                             |
| 255231 | MCOLN2      | mucopolip 2                                                          | 0.37   | CTCTATTAGTCTGTTAATTTA  | NM_153259:    | NM_153259:                                                             |
| 55283  | MCOLN3      | mucopolip 3                                                          | 0.09   | CTGATACATCGAAACAATAA   | NM_018298:    | NM_018298:                                                             |
| 55283  | MCOLN3      | mucopolip 3                                                          | 0.03   | ATGACTTTACTCTGACTATAA  | NM_018298:    | NM_018298:                                                             |
| 28985  | MCTS1       | malignant T cell amplified sequence 1                                | 1.01   | CAGGTTTGAACCTGGCTTAA   | NM_014060:    | NM_014060:                                                             |
| 28985  | MCTS1       | malignant T cell amplified sequence 1                                | 1.15   | GTGGCATATGAAGACATATAA  | NM_014060:    | NM_014060:                                                             |
| 266727 | MDGA1       | MAM domain containing glycosylphosphatidylinositol anchor 1          | 1.54   | CGCGTGTGTTCTATCAATAAA  | NM_153487:    | NM_153487:                                                             |
| 266727 | MDGA1       | MAM domain containing glycosylphosphatidylinositol anchor 1          | 2.12   | CAGGTGCTGATAGCAGCTTAA  | NM_153487:    | NM_153487:                                                             |
| 4190   | MDH1        | malate dehydrogenase 1, NAD (soluble)                                | -0.07  | CTCCCTATTAAATGATTTCTCA | NM_005917:    | NM_005917:                                                             |
| 4190   | MDH1        | malate dehydrogenase 1, NAD (soluble)                                | -3.21  | AAGGAAGTTGGTGTTATGAA   | NM_005917:    | NM_005917:                                                             |
| 4191   | MDH2        | malate dehydrogenase 2, NAD (mitochondrial)                          | 0.16   | CTCTGTGGCGCATCAATAAA   | NM_005918:    | NM_005918:                                                             |
| 4191   | MDH2        | malate dehydrogenase 2, NAD (mitochondrial)                          | 0.44   | CACGGAGGTGGTCAAGGCTAAA | NM_005918:    | NM_005918:                                                             |
| 4192   | MDK         | midkine (neurtie growth-promoting factor 2)                          | -0.54  | CACAATTCATTACTAAGAAA   | NM_002391:    | NM_001012334;NM_002391;NM_001012333:                                   |
| 4192   | MDK         | midkine (neurtie growth-promoting factor 2)                          | -5.08  | CTGCTCGTTAGCTTTAATCAA  | NM_002391:    | NM_001012334;NM_002391;NM_001012333:                                   |
| 56890  | MDM1 (Mdm   | Mdm4, transformed 3T3 cell double minute 1, p53 binding protein (mo  | -0.14  | TAGTAATATATACCTGCTCTA  | NM_020128:    | NM_020128:                                                             |
| 56890  | MDM1 (Mdm   | Mdm4, transformed 3T3 cell double minute 1, p53 binding protein (mo  | -0.74  | TACCATTATCTTATCTAGTAA  | NM_020128:    | NM_020128:                                                             |
| 4193   | MDM2        | Mdm2, transformed 3T3 cell double minute 2, p53 binding protein (mo  | -1.63  | AACCTGAAATTTATTCACATA  | NM_002392:    | NM_006880;NM_006881;NM_002392;NM_006879;NM_006878;NM_006882:           |
| 4193   | MDM2        | Mdm2, transformed 3T3 cell double minute 2, p53 binding protein (mo  | -0.27  | CAGGCAATGTGCAATACCAA   | NM_002392:    | NM_006880;NM_006881;NM_002392;NM_006879;NM_006878;NM_006882:           |
| 4194   | MDM4        | Mdm4, transformed 3T3 cell double minute 4, p53 binding protein (mo  | -0.63  | AAAGAGGTCATGCACATTTA   | NM_002393:    | NM_002393:                                                             |
| 4194   | MDM4        | Mdm4, transformed 3T3 cell double minute 4, p53 binding protein (mo  | 0.16   | TCGAGGCTTCCCGTAAAGAA   | NM_002393:    | NM_002393:                                                             |
| 4204   | MECP2       | methyl CpG binding protein 2 (Rett syndrome)                         | -7.08  | ACGGAGCGGATGCAAAAGCAA  | NM_004992:    | NM_004992:                                                             |
| 4204   | MECP2       | methyl CpG binding protein 2 (Rett syndrome)                         | 0.33   | CAGAGATGCTCTTATATATA   | NM_004992:    | NM_004992:                                                             |
| 51102  | MECR        | mitochondrial trans-2-enoyl-CoA reductase                            | -0.93  | CAGCCTTAAGGTATCTAATAA  | NM_016011:    | NM_016011;NM_01024732:                                                 |
| 51102  | MECR        | mitochondrial trans-2-enoyl-CoA reductase                            | 0.05   | CCAGCCTTAAGGTATCTAATA  | NM_016011:    | NM_016011;NM_01024732:                                                 |
| 9968   | MED12       | mediator of RNA polymerase II transcription, subunit 12 homolog (yea | -1.59  | CAGGCTTAACTCCTTATGTT   | NM_005120:    | NM_005120:                                                             |
| 9968   | MED12       | mediator of RNA polymerase II transcription, subunit 12 homolog (yea | -2.28  | CACCCAAACCTGGTCTCTATA  | NM_005120:    | NM_005120:                                                             |
| 219541 | MED19       | mediator of RNA polymerase II transcription, subunit 19 homolog (yea | 0.39   | CAAGTTGGACCCAAAGATTGAA | NM_153450:    | NM_153450:                                                             |
| 219541 | MED19       | mediator of RNA polymerase II transcription, subunit 19 homolog (yea | -0.99  | TTGGAACAAGCCTATAATAAA  | NM_153450:    | NM_153450:                                                             |
| 29079  | MED4        | mediator of RNA polymerase II transcription, subunit 4 homolog (yeas | -0.01  | CAGAGATAATATCAATTCATA  | NM_014166:    | NM_014166:                                                             |
| 29079  | MED4        | mediator of RNA polymerase II transcription, subunit 4 homolog (yeas | -0.24  | TCGAGGGAATATCCATATA    | NM_014166:    | NM_014166:                                                             |
| 10001  | MED6        | mediator of RNA polymerase II transcription, subunit 6 homolog (yeas | -0.82  | ACCCAAATTTGTCAGCTAATA  | NM_005466:    | NM_005466:                                                             |
| 10001  | MED6        | mediator of RNA polymerase II transcription, subunit 6 homolog (yeas | -2.16  | AAGGGTATTTGGTGGCATTCTA | NM_005466:    | NM_005466:                                                             |
| 112950 | MED8        | mediator of RNA polymerase II transcription, subunit 8 homolog (yeas | -2.86  | CAGGTTTGGTGGCCTGATA    | NM_001001651: | NM_201542;NM_001001651;NM_052877:                                      |
| 112950 | MED8        | mediator of RNA polymerase II transcription, subunit 8 homolog (yeas | -0.86  | CAGGCTAACCTGCTTCTTTA   | NM_001001651: | NM_201542;NM_001001651;NM_052877:                                      |
| 4210   | MEFV        | Mediterranean fever                                                  | -1.69  | AAGGCATATGACACCCCGCTA  | NM_000243:    | NM_000243:                                                             |
| 4210   | MEFV        | Mediterranean fever                                                  | -0.10  | CAGAGGTAAAGTAGGACCGAA  | NM_000243:    | NM_000243:                                                             |
| 9833   | MELK        | maternal embryonic leucine zipper kinase                             | -0.24  | CGGGTTGCTCTCCGTCAGATA  | NM_014791:    | NM_014791:                                                             |
| 9833   | MELK        | maternal embryonic leucine zipper kinase                             | -1.02  | CTGATCATGCAAGATTACAA   | NM_014791:    | NM_014791:                                                             |
| 4221   | MEN1        | multiple endocrine neoplasia 1                                       | -0.45  | CCGGAGTACAGTCTGTATCAA  | NM_000244:    | NM_000244;NM_130800;NM_130803;NM_130802;NM_130801;NM_130799;NM_130804: |
| 4221   | MEN1        | multiple endocrine neoplasia 1                                       | 0.32   | CGGGGAAGACGAGGAGATCTA  | NM_000244:    | NM_130800;NM_130803;NM_130802;NM_130801;NM_130799;NM_130804:           |
| 4224   | MEP1A       | mepirin A, alpha (PABA peptide hydrolase)                            | 0.01   | GAGGOTGAACCGAATGTACAA  | NM_005588:    | NM_005588:                                                             |
| 4224   | MEP1A       | mepirin A, alpha (PABA peptide hydrolase)                            | -7.28  | GACACCTATGATGATAGCTTA  | NM_005588:    | NM_005588:                                                             |
| 4225   | MEP1B (mepi | mepirin A, beta                                                      | 0.83   | TGGCCAGCTAATGAAATTTAA  | NM_005925:    | NM_005925:                                                             |
| 4225   | MEP1B (mepi | mepirin A, beta                                                      | -1.03  | CGGGATGACTATGTCAGGATA  | NM_005925:    | NM_005925:                                                             |
| 10461  | MERTK       | c-mer proto-oncogene tyrosine kinase                                 | -0.10  | CAGACGTTATTTACGTCAATA  | NM_006343:    | NM_006343:                                                             |
| 10461  | MERTK       | c-mer proto-oncogene tyrosine kinase                                 | 0.95   | CAGATGAATGTGTTAAGGAA   | NM_006343:    | NM_006343:                                                             |
| 55897  | MESP1       | mesoderm posterior 1 homolog (mouse)                                 | -1.09  | GTGAATTTATTTATTTGTGAA  | NM_018670:    | NM_018670:                                                             |
| 55897  | MESP1       | mesoderm posterior 1 homolog (mouse)                                 | 1.04   | CTGCCAATGTGAATTTATTT   | NM_018670:    | NM_018670:                                                             |
| 4233   | MET         | met proto-oncogene (hepatocyte growth factor receptor)               | -0.52  | ACCGAGGGAATCATCATGAAA  | NM_000245:    | NM_000245:                                                             |
| 4233   | MET         | met proto-oncogene (hepatocyte growth factor receptor)               | 0.40   | CCGAAGATAAACCTCTCAT    | NM_000245:    | NM_000245:                                                             |
| 23173  | METAP1      | methionyl aminopeptidase 1                                           | 1.15   | CACTGACACTTATCTGTGTA   | NM_015143:    | NM_015143:                                                             |
| 23173  | METAP1      | methionyl aminopeptidase 1                                           | 0.72   | AAAGTTTGAATGATTATCCTA  | NM_015143:    | NM_015143:                                                             |
| 10988  | METAP2      | methionyl aminopeptidase 2                                           | 2.16   | ACCGTCTAATGTAATAACCA   | NM_006838:    | NM_006838:                                                             |
| 10988  | METAP2      | methionyl aminopeptidase 2                                           | 1.82   | AAGACTGTTCCAGCAAGTTAA  | NM_006838:    | NM_006838:                                                             |
| 4234   | METTL1      | methyltransferase like 1                                             | 0.06   | CTGGTGTATACCAATAACCGTA | NM_005371:    | NM_023032;NM_023033;NM_005371:                                         |
| 4234   | METTL1      | methyltransferase like 1                                             | -0.48  | CAGAATATGCTCATCGTCTAA  | NM_005371:    | NM_023032;NM_023033;NM_005371:                                         |
| 339175 | METTL2A     | methyltransferase like 2A                                            | -0.28  | CGCCCTCGGAGCACTCCGAAA  | NM_001005372: | NM_001005372:                                                          |
| 339175 | METTL2A     | methyltransferase like 2A                                            | -4.06  | ACAAGTTGATTATGAGATCAA  | NM_001005372: | NM_001005372;NM_181725:                                                |

|        |          |                                                                          |        |                        |            |                                          |
|--------|----------|--------------------------------------------------------------------------|--------|------------------------|------------|------------------------------------------|
| 29081  | METTL5   | methyltransferase like 5                                                 | -1.87  | CACCTTAGCTATACAAGAA    | NM_014168: | NM_014168:                               |
| 29081  | METTL5   | methyltransferase like 5                                                 | 0.52   | TCACACCACCTTATAGGTATA  | NM_014168: | NM_014168:                               |
| 131965 | METTL6   | methyltransferase like 6                                                 | 0.93   | AAACATTTACAAGGTATTAA   | NM_152396: | NM_152396:                               |
| 131965 | METTL6   | methyltransferase like 6                                                 | 0.27   | GTGGATGTTGTTATGTTGATA  | NM_152396: | NM_152396:                               |
| 25840  | METTL7A  | methyltransferase like 7A                                                | -5.54  | TAGGTTGGTTAGAGGGTTTAA  | NM_014033: | NM_014033:                               |
| 25840  | METTL7A  | methyltransferase like 7A                                                | -4.56  | AAGCAATCTGTGAGTCTGTA   | NM_014033: | NM_014033:                               |
| 196410 | METTL7B  | methyltransferase like 7B                                                | -0.91  | TTCCCTCGTCCCATGGTAAA   | NM_152637: | NM_152637:                               |
| 196410 | METTL7B  | methyltransferase like 7B                                                | 0.44   | CAGGGCAATCTCTAACTCAA   | NM_152637: | NM_152637:                               |
| 4239   | MFAP4    | (micro microtubule-associated protein 4                                  | 0.98   | AACTGGCTTCATACACACAAA  | NM_002404: | NM_002404:                               |
| 4239   | MFAP4    | (micro microtubule-associated protein 4                                  | 0.22   | CGCGGGCTGGAATGACTACAA  | NM_002404: | NM_002404:                               |
| 4241   | MF12     | antigen p97 (melanoma associated) identified by monoclonal antibody      | 1.04   | CGCAACAAGTGTGGGCAA     | NM_005929: | NM_005929:                               |
| 4241   | MF12     | antigen p97 (melanoma associated) identified by monoclonal antibody      | -4.67  | CAGGCACACAACCGCTTTTGA  | NM_005929: | NM_005929:                               |
| 4242   | MFNG     | (manic manic fringe homolog (Drosophila)                                 | -0.70  | CAAGACAATCATCCACAGCTA  | NM_002405: | NM_002405:                               |
| 4242   | MFNG     | (manic manic fringe homolog (Drosophila)                                 | 0.40   | CTGGCTAATGTCTCTCAGTCA  | NM_002405: | NM_002405:                               |
| 83552  | MFRP     | membrane frizzled-related protein                                        | 0.64   | CTGCTCCTCTGTCCTTTA     | NM_031433: | NM_031433:                               |
| 83552  | MFRP     | membrane frizzled-related protein                                        | -2.11  | CAGCATAGAAGTCAAGTCCA   | NM_031433: | NM_031433:                               |
| 8972   | MGAM     | maltase-glucoamylase (alpha-glucoamylase)                                | -16.12 | TGGGAGGAATAATATACCTAA  | NM_004668: | NM_004668:                               |
| 8972   | MGAM     | maltase-glucoamylase (alpha-glucoamylase)                                | 0.81   | CCCAATGGAACCGAACTAAT   | NM_004668: | NM_004668:                               |
| 4245   | MGAT1    | mannosyl (alpha-1,3)-glycoprotein beta-1,2-N-acetylglucosaminyltran      | -0.78  | TTGGTGAAGACAGAAATCGA   | NM_002406: | NM_002406:                               |
| 4245   | MGAT1    | mannosyl (alpha-1,3)-glycoprotein beta-1,2-N-acetylglucosaminyltran      | 0.17   | CAGGACAGCTTCAAGGCTTT   | NM_002406: | NM_002406:                               |
| 79172  | MGC11266 | hypothetical protein MGC11266                                            | 0.64   | TTGGCACATCGTAGAAACCAA  | XM_379881: | NM_024322:                               |
| 84329  | MGC15619 | hypothetical protein MGC15619                                            | -2.26  | CAGCCGACAAAGAAATAACT   | NM_032369: | NM_032369:                               |
| 84329  | MGC15619 | hypothetical protein MGC15619                                            | -1.40  | CAGGTTCCAGGCCATCAGTAA  | NM_032369: | NM_032369:                               |
| 85007  | MGC15875 | hypothetical protein LOC85007, isoform 2                                 | 0.00   | GAGGAACATCCTGAAGTTTAA  | NM_032921: | NM_032921:NM_153373:                     |
| 85007  | MGC15875 | hypothetical protein LOC85007, isoform 2                                 | -0.37  | CAGGATCATGCCACAGTGTA   | NM_032921: | NM_032921:NM_153373:                     |
| 93627  | MGC16169 | hypothetical protein MGC16169                                            | 0.30   | GTCCGATGTTGTTATTTAGAAA | NM_033115: | NM_033115:                               |
| 93627  | MGC16169 | hypothetical protein MGC16169                                            | 0.31   | CGGAATAGTGAAGACTTTAT   | NM_033115: | NM_033115:                               |
| 92806  | MGC16385 | hypothetical protein MGC16385                                            | -0.01  | CTCGTTGACTGCCATCGAA    | NM_145039: | NM_145039:                               |
| 92806  | MGC16385 | hypothetical protein MGC16385                                            | 1.39   | AAGGTGTAATCTCGACCTTGA  | NM_145039: | NM_145039:                               |
| 143630 | MGC20470 | hypothetical protein MGC20470                                            | -1.55  | ACCAATGTGCTTGTACTGAA   | NM_145053: | NM_145053:                               |
| 143630 | MGC20470 | hypothetical protein MGC20470                                            | -4.05  | CAGGCACTATTGCTACTGAA   | NM_145053: | NM_145053:                               |
| 147015 | MGC23280 | hypothetical protein MGC23280                                            | -0.80  | CGTCTAGTGTAGTGTAAA     | NM_144683: | NM_144683:                               |
| 147015 | MGC23280 | hypothetical protein MGC23280                                            | -3.87  | ACCGTCTAGCTAGGTAGTTAA  | NM_144683: | NM_144683:                               |
| 84291  | MGC2408  | hypothetical protein MGC2408                                             | -0.14  | TCCGGAGTTACCAGGCGGAA   | NM_032331: | NM_032331:                               |
| 84291  | MGC2408  | hypothetical protein MGC2408                                             | 0.02   | CTGGAGCGCGTTTATCTCAA   | NM_032331: | NM_032331:                               |
| 79080  | MGC2574  | hypothetical protein MGC2574                                             | 0.22   | CCGAAGGCCCGCCGAAGACAA  | NM_024098: | NM_024098:                               |
| 79080  | MGC2574  | hypothetical protein MGC2574                                             | -0.30  | CTCGGAGTTGGCCGAGAATA   | NM_024098: | NM_024098:                               |
| 284439 | MGC26694 | hypothetical protein MGC26694                                            | 1.91   | CCGAAGGAAATGTACAGCAA   | XM_209204: | NM_178526:                               |
| 284439 | MGC26694 | hypothetical protein MGC26694                                            | -0.55  | ATGGTAATGTGTGAAGGAA    | XM_209204: | NM_178526:                               |
| 256710 | MGC26856 | hypothetical protein MGC26856                                            | -2.21  | CACAACGAATGGCGTGGCAA   | NM_152779: | NM_152779:                               |
| 256710 | MGC26856 | hypothetical protein MGC26856                                            | 0.04   | TTGCTGATACCTAAATTTAA   | NM_152779: | NM_152779:                               |
| 166929 | MGC28963 | hypothetical protein MGC28963                                            | -2.09  | AACGATTAGAAGATGAACAA   | NM_152621: | NM_152621:                               |
| 166929 | MGC28963 | hypothetical protein MGC28963                                            | 0.40   | AACGCTTAACCAAAAGTATA   | NM_152621: | NM_152621:                               |
| 79089  | MGC3123  | hypothetical protein MGC3123                                             | -0.09  | AGGCATGGTCTTCTCTTTA    | NM_024107: | NM_024107:NM_177441:                     |
| 79089  | MGC3123  | hypothetical protein MGC3123                                             | -0.63  | CTGGTACTTCGGAATCAATTA  | NM_024107: | NM_024107:NM_177441:                     |
| 284427 | MGC34725 | hypothetical protein MGC34725                                            | 1.96   | AATGGTGAACATGTACACAA   | NM_173637: | NM_173637:                               |
| 284427 | MGC34725 | hypothetical protein MGC34725                                            | 0.04   | ATGATGACAAACACTTGA     | NM_173637: | NM_173637:                               |
| 219995 | MGC35295 | hypothetical protein MGC35295                                            | -2.37  | CGCCTTCAGCGAGACTTCAA   | NM_152717: | NM_152717:                               |
| 219995 | MGC35295 | hypothetical protein MGC35295                                            | -0.12  | AAGGACAAGGCTACCACAGAA  | NM_152717: | NM_152717:                               |
| 348035 | MGC40069 | hypothetical protein MGC40069                                            | 0.20   | CCGAGTCACTGACAAATCTA   | NM_182615: | NM_182615:                               |
| 348035 | MGC40069 | hypothetical protein MGC40069                                            | -0.13  | AACGGGATTTTACAGTAGAA   | NM_182615: | NM_182615:                               |
| 256356 | MGC40579 | hypothetical protein MGC40579                                            | -1.18  | CAGCAATGGGTGTAATTTCA   | NM_152776: | NM_152776:                               |
| 256356 | MGC40579 | hypothetical protein MGC40579                                            | -0.39  | TACCATCTGTACAGGCAATA   | NM_152776: | NM_152776:                               |
| 79154  | MGC4172  | short-chain dehydrogenase/reductase                                      | -0.07  | CCGAGTGGATTTGATGGTAT   | NM_024308: | NM_024308:                               |
| 79154  | MGC4172  | short-chain dehydrogenase/reductase                                      | 0.20   | CGCCTCAAACTCCACGACAA   | NM_024308: | NM_024308:                               |
| 167359 | MGC42105 | hypothetical protein MGC42105                                            | 1.19   | GAGCATATTCGAAATAACCA   | NM_153361: | NM_153361:                               |
| 167359 | MGC42105 | hypothetical protein MGC42105                                            | -1.52  | CGGAATCGATGCATCATGAA   | NM_153361: | NM_153361:                               |
| 254013 | MGC50559 | hypothetical protein MGC50559                                            | -0.23  | CTCAATGGTGGCAGCATTTAA  | NM_173802: | NM_173802:                               |
| 254013 | MGC50559 | hypothetical protein MGC50559                                            | -0.50  | ATGAAATGTAATTTGTTAAA   | NM_173802: | NM_173802:                               |
| 124221 | MGC52282 | hypothetical protein MGC52282                                            | -1.33  | AAGTGCTAAGCTACACAGAC   | NM_178453: | NM_178453:                               |
| 124221 | MGC52282 | hypothetical protein MGC52282                                            | -0.14  | AAGTCTGCTGCTTGAAGCTG   | NM_178453: | NM_178453:                               |
| 11343  | MGLL     | monoglyceride lipase                                                     | 2.39   | TCAGAGCTTGATGCTACTGTA  | NM_007283: | NM_007283:NM_001003794:                  |
| 11343  | MGLL     | monoglyceride lipase                                                     | -0.06  | CTGGACCTTACCTAATGGTTA  | NM_007283: | NM_007283:NM_001003794:                  |
| 4255   | MGMT     | (O-6-n O-6-methylguanine-DNA methyltransferase                           | 0.36   | CACCAGACAGGTTTATGGAA   | NM_002412: | NM_002412:                               |
| 4255   | MGMT     | (O-6-n O-6-methylguanine-DNA methyltransferase                           | -0.98  | CGCGCTCTCACCATCCCGTT   | NM_002412: | NM_002412:                               |
| 4257   | MGST1    | microsomal glutathione S-transferase 1                                   | -3.10  | ACCCAGTAATGGATGATGAA   | NM_020300: | NM_020300:NM_145764:NM_145791:NM_145792: |
| 4257   | MGST1    | microsomal glutathione S-transferase 1                                   | 0.46   | AGAAGTATCTTCCGAACAGAT  | NM_020300: | NM_020300:NM_145764:NM_145791:NM_145792: |
| 4258   | MGST2    | microsomal glutathione S-transferase 2                                   | 0.76   | TAATATGGTATCAITTTGTTAA | NM_002413: | NM_002413:                               |
| 4258   | MGST2    | microsomal glutathione S-transferase 2                                   | -1.27  | CACCATGAAGGTAATATGGTA  | NM_002413: | NM_002413:                               |
| 4259   | MGST3    | microsomal glutathione S-transferase 3                                   | 0.06   | CCAGAACAGTGGAAAGTGTAA  | NM_004528: | NM_004528:                               |
| 4259   | MGST3    | microsomal glutathione S-transferase 3                                   | -3.15  | CTGGTCTGCCAGCTTTTATA   | NM_004528: | NM_004528:                               |
| 57534  | MIB1     | mindbomb homolog 1 (Drosophila)                                          | 0.16   | AACGAAGAGTGCCCTTTCATTA | NM_020774: | NM_020774:                               |
| 57534  | MIB1     | mindbomb homolog 1 (Drosophila)                                          | 0.06   | CTGGAGTCTCTATGATTA     | NM_020774: | NM_020774:                               |
| 4276   | MICA     | MHC class I polypeptide-related sequence A                               | -0.06  | CGGGCTAGTCTGAGGAGAA    | NM_000247: | NM_000247:                               |
| 4276   | MICA     | MHC class I polypeptide-related sequence A                               | -3.65  | CTGGCTTCTATCCCTGGAA    | NM_000247: | NM_000247:                               |
| 4277   | MICB     | MHC class I polypeptide-related sequence B                               | 1.33   | CGTAAATGTTTACTCTTTAA   | NM_005931: | NM_005931:                               |
| 4277   | MICB     | MHC class I polypeptide-related sequence B                               | 0.09   | ATGGGTGAACCTTATGAGTGA  | NM_005931: | NM_005931:                               |
| 4281   | MID1     | midline 1 (Opitz/BBB syndrome)                                           | -2.50  | CGGGCTTAAATAATTTCTTTA  | NM_033290: | NM_000381:NM_033290:NM_033291:           |
| 4281   | MID1     | midline 1 (Opitz/BBB syndrome)                                           | 0.85   | CAGGATGTGTTGAACCTAGT   | NM_033290: | NM_000381:NM_033290:NM_033291:           |
| 11043  | MID2     | midline 2                                                                | -0.06  | AGCGAGCGAATGCTTGCCAA   | NM_012216: | NM_052817:NM_012216:                     |
| 11043  | MID2     | midline 2                                                                | -0.23  | CACGGTTTCTACAGTCTGCAA  | NM_012216: | NM_052817:NM_012216:                     |
| 90007  | MIDN     | midnolin                                                                 | 0.11   | ACCGTTGTTCTCGTAGGTGAA  | XM_028067: | NM_177401:                               |
| 90007  | MIDN     | midnolin                                                                 | 1.11   | ACCGGCTTCGGACACAGAAA   | XM_028067: | NM_177401:                               |
| 4282   | MIF      | macrophage migration inhibitory factor (glycosylation-inhibiting factor) | -3.59  | CAGGCTCATACCACTATTA    | NM_002415: | NM_002415:                               |
| 4282   | MIF      | macrophage migration inhibitory factor (glycosylation-inhibiting factor) | -0.77  | CATGCCGATGTCTCATGATA   | NM_002415: | NM_002415:                               |
| 84864  | MINA     | MYC induced nuclear antigen                                              | -3.26  | AACCAGATTTAAGTCTATA    | NM_032778: | NM_032778:                               |
| 84864  | MINA     | MYC induced nuclear antigen                                              | -1.21  | TACCTGGGATCTACTAAGAA   | NM_032778: | NM_032778:                               |
| 50488  | MINK1    | misshapen-like kinase 1 (zebrafish)                                      | -4.00  | CACGTACGGGCGCATCATTTAA | NM_015716: | NM_170663:NM_001024937:NM_015716:NM_1538 |
| 50488  | MINK1    | misshapen-like kinase 1 (zebrafish)                                      | 0.36   | CGAGACTTTGTTGGTGGAA    | NM_015716: | 27:NM_001024937:NM_015716:NM_153827:     |
| 9562   | MINPP1   | multiple inositol polyphosphate histidine phosphatase, 1                 | 1.09   | CACGCTAACACAGATCCGCAA  | NM_004897: | NM_004897:                               |
| 9562   | MINPP1   | multiple inositol polyphosphate histidine phosphatase, 1                 | -1.11  | CGAGTGCAGATGTTATTTAA   | NM_004897: | NM_004897:                               |
| 4284   | MIP      | major intrinsic protein of lens fiber                                    | 1.13   | CCCGATGTCTCAATGGACAA   | NM_012064: | NM_012064:                               |
| 4284   | MIP      | major intrinsic protein of lens fiber                                    | 0.22   | CGGGTCAAGAGTATTTCTGA   | NM_012064: | NM_012064:                               |
| 4285   | MIPEP    | mitochondrial intermediate peptidase                                     | -1.19  | CTCCAAGGAACGATAGCTAAA  | NM_005932: | NM_005932:                               |
| 4285   | MIPEP    | mitochondrial intermediate peptidase                                     | -0.71  | CACATTCGTCTCACTTTACA   | NM_005932: | NM_005932:                               |

|        |        |                                                                       |       |                         |              |                                                                                                                                      |
|--------|--------|-----------------------------------------------------------------------|-------|-------------------------|--------------|--------------------------------------------------------------------------------------------------------------------------------------|
| 4286   | MITF   | microphthalmia-associated transcription factor                        | -0.31 | CATGATGGTATCTATAGTCAA   | NM_000248:   | NM_000248:NM_198159:NM_198158:NM_006722:<br>NM_198177:NM_198178:<br>NM_000248:NM_198159:NM_198158:NM_006722:<br>NM_198177:NM_198178: |
| 4286   | MITF   | microphthalmia-associated transcription factor                        | -0.15 | CAGCCTACAACCTGAATAGCAA  | NM_000248:   | NM_000248:                                                                                                                           |
| 4288   | MKI67  | antigen identified by monoclonal antibody Ki-67                       | 0.50  | CAGGCACTCGGTAACACGAA    | NM_002417:   | NM_002417:                                                                                                                           |
| 4288   | MKI67  | antigen identified by monoclonal antibody Ki-67                       | -1.54 | CGGGTTTAGGGAACCTGCAA    | NM_002417:   | NM_002417:                                                                                                                           |
| 8569   | MKNK1  | MAP kinase interacting serine/threonine kinase 1                      | -1.46 | CCAGCAAGATGATACCTTAA    | NM_003684:   | NM_003684:                                                                                                                           |
| 8569   | MKNK1  | MAP kinase interacting serine/threonine kinase 1                      | -1.23 | TAGATAGTGCTCTGTGCGTAA   | NM_003684:   | NM_003684:                                                                                                                           |
| 2872   | MKNK2  | MAP kinase interacting serine/threonine kinase 2                      | 0.34  | CGGCTTCACTGCTGTTTGA     | NM_017572:   | NM_199054:NM_017572:                                                                                                                 |
| 2872   | MKNK2  | MAP kinase interacting serine/threonine kinase 2                      | 0.35  | TTGAGCTTTCGCATACAAA     | NM_017572:   | NM_199054:NM_017572:                                                                                                                 |
| 23608  | MKRN1  | makorin, ring finger protein, 1                                       | 0.72  | CTCTTGTTTAAATGCACACAA   | NM_013446:   | NM_013446:                                                                                                                           |
| 23608  | MKRN1  | makorin, ring finger protein, 1                                       | 0.16  | CACGAATTTAACTGTCAGACA   | NM_013446:   | NM_013446:                                                                                                                           |
| 23609  | MKRN2  | makorin, ring finger protein, 2                                       | -4.07 | AGCAAAACAAGTGGAAAGTATA  | NM_014160:   | NM_014160:                                                                                                                           |
| 23609  | MKRN2  | makorin, ring finger protein, 2                                       | -2.20 | AAGGCACTGTGAGGTTCTTTA   | NM_014160:   | NM_014160:                                                                                                                           |
| 7681   | MKRN3  | makorin, ring finger protein, 3                                       | 1.41  | GAGGACTTCAAAAGCACTATA   | NM_005664:   | NM_005664:                                                                                                                           |
| 7681   | MKRN3  | makorin, ring finger protein, 3                                       | -0.93 | AAGCGAGTAAATGACATCTAA   | NM_005664:   | NM_005664:                                                                                                                           |
| 91807  | MLCK   | MLCK protein                                                          | -2.49 | ACGGAGGACAATGACCTTGGCA  | NM_182493:   | NM_182493:                                                                                                                           |
| 91807  | MLCK   | MLCK protein                                                          | 1.03  | GACCATGAATTTCTATTGTAAA  | NM_182493:   | NM_182493:                                                                                                                           |
| 4291   | MLF1   | (myeloid myeloid leukemia factor 1                                    | -0.61 | GACCAATCTCTTGCTGTTAAA   | NM_022443.1: | NM_022443:                                                                                                                           |
| 4291   | MLF1   | (myeloid myeloid leukemia factor 1                                    | 1.07  | CAGGAGTTCATCAATATGAAT   | NM_022443.1: | NM_022443:                                                                                                                           |
| 79682  | MLF1IP | MLF1 interacting protein                                              | 0.46  | AGGGCGGCAAGACGCTCAAGAA  | NM_024629:   | NM_024629:                                                                                                                           |
| 79682  | MLF1IP | MLF1 interacting protein                                              | 0.67  | ATGAGCTATAATAAACTGTGA   | NM_024629:   | NM_024629:                                                                                                                           |
| 4292   | MLH1   | mutL homolog 1, colon cancer, nonpolyposis type 2 (E. coli)           | -0.03 | CCGATACAAAGTGTGTATACA   | NM_000249:   | NM_000249:                                                                                                                           |
| 4292   | MLH1   | mutL homolog 1, colon cancer, nonpolyposis type 2 (E. coli)           | 1.90  | GTGGCTCATGTACTATTACA    | NM_000249:   | NM_000249:                                                                                                                           |
| 27030  | MLH3   | mutL homolog 3 (E. coli)                                              | -1.72 | ACGAATATAAGTTATGGGCTA   | NM_014381:   | NM_014381:                                                                                                                           |
| 27030  | MLH3   | mutL homolog 3 (E. coli)                                              | -1.30 | CAGAAGTGTGCTATATAGTAT   | NM_014381:   | NM_014381:                                                                                                                           |
| 197259 | MLKL   | mixed lineage kinase domain-like                                      | 1.13  | CACGCTTCTCTGTACAAATA    | NM_152649:   | NM_152649:                                                                                                                           |
| 197259 | MLKL   | mixed lineage kinase domain-like                                      | 1.11  | CAGAGTCAAATCTACAGCATA   | NM_152649:   | NM_152649:                                                                                                                           |
| 4297   | MLL    | myeloid/lymphoid or mixed-lineage leukemia (trithorax homolog, Dros   | 0.03  | ATGGCAATAGTCTAAGCAAAA   | NM_005933:   | NM_005933:                                                                                                                           |
| 4297   | MLL    | myeloid/lymphoid or mixed-lineage leukemia (trithorax homolog, Dros   | -1.74 | CTCGATCAAATGCCCGCTTAA   | NM_005933:   | NM_005933:                                                                                                                           |
| 8085   | MLL2   | myeloid/lymphoid or mixed-lineage leukemia 2                          | -7.73 | CACCAGCATGTCTAAGGCATA   | NM_003482:   | NM_003482:                                                                                                                           |
| 8085   | MLL2   | myeloid/lymphoid or mixed-lineage leukemia 2                          | 1.71  | CGGCCGGAGTTGTAAATCAAA   | NM_003482:   | NM_003482:                                                                                                                           |
| 58508  | MLL3   | myeloid/lymphoid or mixed-lineage leukemia 3                          | -1.72 | CCGAGTGAGCTTCCCTCAACAA  | NM_021230:   | NM_170606:NM_021230:                                                                                                                 |
| 58508  | MLL3   | myeloid/lymphoid or mixed-lineage leukemia 3                          | 0.00  | CTGAACAGATTCGTAACAAA    | NM_021230:   | NM_170606:NM_021230:                                                                                                                 |
| 9757   | MLL4   | myeloid/lymphoid or mixed-lineage leukemia 4                          | -0.11 | CCGAGGTTGCCAGCACTATA    | NM_014727:   | NM_014727:                                                                                                                           |
| 9757   | MLL4   | myeloid/lymphoid or mixed-lineage leukemia 4                          | -0.73 | TCGAATCAAAGTGCACAACTA   | NM_014727:   | NM_014727:                                                                                                                           |
| 55904  | MLL5   | myeloid/lymphoid or mixed-lineage leukemia 5 (trithorax homolog, Dro  | -3.18 | CAGCCGAATCCCATCAGCAA    | NM_018682:   | NM_018682:NM_182931:                                                                                                                 |
| 55904  | MLL5   | myeloid/lymphoid or mixed-lineage leukemia 5 (trithorax homolog, Dro  | 1.45  | CAGCAACATACAGTCAGTTTA   | NM_018682:   | NM_018682:NM_182931:                                                                                                                 |
| 4298   | MLL11  | myeloid/lymphoid or mixed-lineage leukemia (trithorax homolog, Dros   | -1.21 | CTGCTTCAATTTGGATATCAGA  | NM_005934:   | NM_005934:                                                                                                                           |
| 4298   | MLL11  | myeloid/lymphoid or mixed-lineage leukemia (trithorax homolog, Dros   | 0.82  | CCGCAAAAGCTCCGAGAGCAA   | NM_005934:   | NM_005934:                                                                                                                           |
| 8028   | MLL110 | myeloid/lymphoid or mixed-lineage leukemia (trithorax homolog, Dros   | 1.12  | CGCAAAATACTTATTCATCAA   | NM_004641:   | NM_004641:NM_001009569:                                                                                                              |
| 8028   | MLL110 | myeloid/lymphoid or mixed-lineage leukemia (trithorax homolog, Dros   | -0.10 | CAGATTCGCTATGATCAACCA   | NM_004641:   | NM_004641:NM_001009569:                                                                                                              |
| 4301   | MLL14  | myeloid/lymphoid or mixed-lineage leukemia (trithorax homolog, Dros   | 0.26  | ATGCCGATGATGATTTGCCAA   | NM_005936:   | NM_005936:                                                                                                                           |
| 4301   | MLL14  | myeloid/lymphoid or mixed-lineage leukemia (trithorax homolog, Dros   | -3.76 | CAGCAGTTGGCCATATTGAA    | NM_005936:   | NM_005936:                                                                                                                           |
| 4302   | MLL16  | myeloid/lymphoid or mixed-lineage leukemia (trithorax homolog, Dros   | -1.42 | CAGGCTGTCTCAACAGCCTTA   | NM_005937:   | NM_005937:                                                                                                                           |
| 4302   | MLL16  | myeloid/lymphoid or mixed-lineage leukemia (trithorax homolog, Dros   | 0.12  | CAGCCATAGCCTGAGTCATAA   | NM_005937:   | NM_005937:                                                                                                                           |
| 4295   | MLN    | motilin                                                               | -0.54 | CTCCAAGATGGTATCCCGTAA   | NM_002418:   | NM_002418:                                                                                                                           |
| 4295   | MLN    | motilin                                                               | -8.79 | AAGGAACGGAATAAAGGGCAA   | NM_002418:   | NM_002418:                                                                                                                           |
| 2862   | MLNR   | motilin receptor                                                      | 0.06  | CGGGCTGCCGTTGCAGCTGTA   | NM_001507:   | NM_001507:                                                                                                                           |
| 2862   | MLNR   | motilin receptor                                                      | 0.35  | TGGCAGAATCATTACATAAA    | NM_001507:   | NM_001507:                                                                                                                           |
| 84458  | MLR2   | ligand-dependent corepressor                                          | 0.64  | ACGGAGAGCGCGCTTAGTAAA   | NM_032440:   | NM_032440:                                                                                                                           |
| 84458  | MLR2   | ligand-dependent corepressor                                          | 1.76  | CTGAGAGTTGTAATAGTGAA    | NM_032440:   | NM_032440:                                                                                                                           |
| 6945   | MLX    | MAX-like protein X                                                    | 0.08  | CAGGTATAACACAGCACTACA   | NM_170607:   | NM_198205:NM_198204:NM_170607:                                                                                                       |
| 6945   | MLX    | MAX-like protein X                                                    | 0.24  | CAGATTTCTGCTGATGCTA     | NM_170607:   | NM_198205:NM_198204:NM_170607:                                                                                                       |
| 23417  | MLYCD  | malonyl-CoA decarboxylase                                             | 0.08  | TAGGTTTAAATGATCAGGGA    | NM_012213:   | NM_012213:                                                                                                                           |
| 23417  | MLYCD  | malonyl-CoA decarboxylase                                             | -1.76 | AAGTTGGATAATAGGCTTTAA   | NM_012213:   | NM_012213:                                                                                                                           |
| 166785 | MMAA   | methylmalonic aciduria (cobalamin deficiency) cblA type               | 0.75  | CGGATATGACATAATCTTAA    | NM_172250:   | NM_172250:                                                                                                                           |
| 166785 | MMAA   | methylmalonic aciduria (cobalamin deficiency) cblA type               | -0.70 | AAGGAGCGGGATATGACATAA   | NM_172250:   | NM_172250:                                                                                                                           |
| 23531  | MMD    | monocyte to macrophage differentiation-associated                     | 0.40  | AACCACTAATATGATATGAAA   | NM_012329:   | NM_012329:                                                                                                                           |
| 23531  | MMD    | monocyte to macrophage differentiation-associated                     | 0.03  | AACATTTATGATTTTCTCTA    | NM_012329:   | NM_012329:                                                                                                                           |
| 221938 | MMD2   | monocyte to macrophage differentiation-associated 2                   | 0.00  | AAGTTTGTGATGCCAACATT    | NM_198403:   | NM_198403:                                                                                                                           |
| 221938 | MMD2   | monocyte to macrophage differentiation-associated 2                   | -0.03 | CAGTATTAATATCTCAACA     | NM_198403:   | NM_198403:                                                                                                                           |
| 4311   | MME    | membrane metallo-endopeptidase (neutral endopeptidase, enkephalir     | 0.67  | ACCGTTACAAGTATACTTTATA  | NM_000902:   | NM_007288:NM_007289:NM_007287:NM_000902:                                                                                             |
| 4311   | MME    | membrane metallo-endopeptidase (neutral endopeptidase, enkephalir     | 1.45  | CACCGTTACAAGTATACTTTATA | NM_000902:   | NM_007288:NM_007289:NM_007287:NM_000902:                                                                                             |
| 79258  | MMEL1  | membrane metallo-endopeptidase-like 1                                 | -0.15 | TGGCCGGAACCTGCACAAGAA   | NM_033467:   | NM_033467:                                                                                                                           |
| 79258  | MMEL1  | membrane metallo-endopeptidase-like 1                                 | 0.20  | CACCGACGCGTTTGAGACAAA   | NM_033467:   | NM_033467:                                                                                                                           |
| 4312   | MMP1   | matrix metalloproteinase 1 (interstitial collagenase)                 | 1.01  | AAGCGTGTGACAGTAAGCTAA   | NM_002421:   | NM_002421:                                                                                                                           |
| 4312   | MMP1   | matrix metalloproteinase 1 (interstitial collagenase)                 | 2.13  | TGGAGGTATGATGAATATAAA   | NM_002421:   | NM_002421:                                                                                                                           |
| 4319   | MMP10  | matrix metalloproteinase 10 (stromelysin 2)                           | -0.63 | GACACACATATAAAGAGTAA    | NM_002425:   | NM_002425:                                                                                                                           |
| 4319   | MMP10  | matrix metalloproteinase 10 (stromelysin 2)                           | 0.01  | CAGGATGGTGACACACATATT   | NM_002425:   | NM_002425:                                                                                                                           |
| 4320   | MMP11  | matrix metalloproteinase 11 (stromelysin 3)                           | 0.64  | TAAACTGAGGATTTGCTATTAA  | NM_005940:   | NM_005940:                                                                                                                           |
| 4320   | MMP11  | matrix metalloproteinase 11 (stromelysin 3)                           | 0.43  | CGCCCTACTGGAAGTTTGA     | NM_005940:   | NM_005940:                                                                                                                           |
| 4321   | MMP12  | matrix metalloproteinase 12 (macrophage elastase)                     | -1.96 | ATCCTTGAGCTGAGAAATTTA   | NM_002426:   | NM_002426:                                                                                                                           |
| 4321   | MMP12  | matrix metalloproteinase 12 (macrophage elastase)                     | -2.66 | ACCATAGGTATGATTTATATA   | NM_002426:   | NM_002426:                                                                                                                           |
| 4322   | MMP13  | matrix metalloproteinase 13 (collagenase 3)                           | -0.84 | GAGGAGAAACAATGATCTTTA   | NM_002427:   | NM_002427:                                                                                                                           |
| 4322   | MMP13  | matrix metalloproteinase 13 (collagenase 3)                           | -0.01 | TCCGAGACTAATAGAAGAAGA   | NM_002427:   | NM_002427:                                                                                                                           |
| 4323   | MMP14  | matrix metalloproteinase 14 (membrane-inserted)                       | -4.39 | CACAAGGACTTTGCCCTCTGAA  | NM_004995:   | NM_004995:                                                                                                                           |
| 4323   | MMP14  | matrix metalloproteinase 14 (membrane-inserted)                       | -1.09 | CAGCGATGAAGTCTTCACTTA   | NM_004995:   | NM_004995:                                                                                                                           |
| 4324   | MMP15  | matrix metalloproteinase 15 (membrane-inserted)                       | 1.01  | TACATTTATTTCTGTAATAA    | NM_002428:   | NM_002428:                                                                                                                           |
| 4324   | MMP15  | matrix metalloproteinase 15 (membrane-inserted)                       | 1.05  | CACCAAATCTGGAAATTCGA    | NM_002428:   | NM_002428:                                                                                                                           |
| 4325   | MMP16  | matrix metalloproteinase 16 (membrane-inserted)                       | 0.92  | CAGGAGTTTGTGGTAACCTTGA  | NM_005941:   | NM_005941:                                                                                                                           |
| 4325   | MMP16  | matrix metalloproteinase 16 (membrane-inserted)                       | -0.01 | CGCCACATACGTACTGTAA     | NM_005941:   | NM_005941:                                                                                                                           |
| 4326   | MMP17  | matrix metalloproteinase 17 (membrane-inserted)                       | -1.95 | ATGACAGGACTTATTTCTTTA   | NM_016155:   | NM_016155:                                                                                                                           |
| 4326   | MMP17  | matrix metalloproteinase 17 (membrane-inserted)                       | 0.96  | AAGGACAATAACGTAGAGGAA   | NM_016155:   | NM_016155:                                                                                                                           |
| 4313   | MMP2   | matrix metalloproteinase 2 (gelatinase A, 72kDa gelatinase, 72kDa typ | -0.34 | CAGGCTTCTCTCCTTCCACAA   | NM_004530:   | NM_004530:                                                                                                                           |
| 4313   | MMP2   | matrix metalloproteinase 2 (gelatinase A, 72kDa gelatinase, 72kDa typ | -0.12 | CGCGCGCTGCCCATCATCAA    | NM_004530:   | NM_004530:                                                                                                                           |
| 9313   | MMP20  | matrix metalloproteinase 20 (enamelysin)                              | -0.92 | ATCGATGCTGCTGTAGAATTA   | NM_004771:   | NM_004771:                                                                                                                           |
| 9313   | MMP20  | matrix metalloproteinase 20 (enamelysin)                              | 0.27  | CACAATGAACGTGATCAAGAA   | NM_004771:   | NM_004771:                                                                                                                           |
| 118856 | MMP21  | (matr matrix metalloproteinase 21                                     | 1.09  | CACACTGAACATGATAAAGA    | NM_147191:   | NM_147191:                                                                                                                           |
| 118856 | MMP21  | (matr matrix metalloproteinase 21                                     | -1.77 | CGCTTATTACTCTATGCTAT    | NM_147191:   | NM_147191:                                                                                                                           |
| 10893  | MMP24  | matrix metalloproteinase 24 (membrane-inserted)                       | 0.17  | CAGGCTCTCTCGGAGACCCA    | NM_006690:   | NM_006690:                                                                                                                           |
| 10893  | MMP24  | matrix metalloproteinase 24 (membrane-inserted)                       | 0.09  | TGGGAGATTTGCTTCTTCAA    | NM_006690:   | NM_006690:                                                                                                                           |
| 64386  | MMP25  | matrix metalloproteinase 25                                           | 1.29  | ACGGCCGAATCCTCCTTTTA    | NM_022468:   | NM_022718:NM_022468:                                                                                                                 |
| 64386  | MMP25  | matrix metalloproteinase 25                                           | 0.48  | CAGAATCACTGGGAAATTTAA   | NM_022468:   | NM_022718:NM_022468:                                                                                                                 |
| 56547  | MMP26  | matrix metalloproteinase 26                                           | -0.07 | ACGCTACTGAGTCAACAATAA   | NM_021801:   | NM_021801:                                                                                                                           |
| 56547  | MMP26  | matrix metalloproteinase 26                                           | -0.68 | AACGCTACTGAGTCAACAATAA  | NM_021801:   | NM_021801:                                                                                                                           |
| 79148  | MMP28  | matrix metalloproteinase 28                                           | -1.66 | CTGCCTTTGTTCTTGAAGAA    | NM_024302:   | NM_024302:                                                                                                                           |



|        |          |                                                                       |       |                        |            |                                      |
|--------|----------|-----------------------------------------------------------------------|-------|------------------------|------------|--------------------------------------|
| 79148  | MMP28    | matrix metalloproteinase 28                                           | -0.90 | CCCAAGGAAGGGCCCTGAAA   | NM_024302: | NM_024302:                           |
| 4314   | MMP3     | matrix metalloproteinase 3 (stromelysin 1, progelatinase)             | 0.98  | CAGCCATTTCTGATAAGGAAA  | NM_002422: | NM_002422:                           |
| 4314   | MMP3     | matrix metalloproteinase 3 (stromelysin 1, progelatinase)             | -2.88 | GTGACATTTGCTTATTTAA    | NM_002422: | NM_002422:                           |
| 4316   | MMP7     | matrix metalloproteinase 7 (matrilysin, uterine)                      | 0.52  | GTGCGGTAGATGTCAATAAA   | NM_002423: | NM_002423:                           |
| 4316   | MMP7     | matrix metalloproteinase 7 (matrilysin, uterine)                      | 0.80  | TGGACGGATGGTAGCAGTCTA  | NM_002423: | NM_002423:                           |
| 4317   | MMP8     | matrix metalloproteinase 8 (neutrophil collagenase)                   | 0.40  | TCCCAAGGATATATCAAACTA  | NM_002424: | NM_002424:                           |
| 4317   | MMP8     | matrix metalloproteinase 8 (neutrophil collagenase)                   | 0.58  | ATGGACCAACACCTCCGCAAA  | NM_002424: | NM_002424:                           |
| 4318   | MMP9     | matrix metalloproteinase 9 (gelatinase B, 92kDa gelatinase, 92kDa typ | -0.50 | AACCTTTGAGGGCGACCTCAA  | NM_004994: | NM_004994:                           |
| 4318   | MMP9     | matrix metalloproteinase 9 (gelatinase B, 92kDa gelatinase, 92kDa typ | -1.92 | ACGGCTTGCCCTGGTGCACTA  | NM_004994: | NM_004994:                           |
| 4328   | MMP11    | matrix metalloproteinase-like 1                                       | 1.10  | CAGGGATGATGGAGAGTTTCAT | NM_004142: | NM_004142:                           |
| 64210  | MMS19L   | MMS19-like (MET18 homolog, S. cerevisiae)                             | -0.72 | ATGGGTGTACAAAGAACATAA  | NM_022362: | NM_022362:                           |
| 64210  | MMS19L   | MMS19-like (MET18 homolog, S. cerevisiae)                             | 0.02  | TTGCGTTTGAAAGAAAGATCTA | NM_022362: | NM_022362:                           |
| 54542  | MNAB     | membrane associated DNA binding protein                               | -0.25 | CAGCAGTTGTCTGCCAATCTA  | NM_018835: | NM_018835:                           |
| 54542  | MNAB     | membrane associated DNA binding protein                               | -1.23 | CGGGAAAGATATAAECTCATA  | NM_018835: | NM_018835:                           |
| 4331   | MNAT1    | menage a trois homolog 1, cyclin H assembly factor (Xenopus laevis)   | 0.02  | AAGGAGTTGAGATCAGGAAA   | NM_002431: | NM_002431:                           |
| 4331   | MNAT1    | menage a trois homolog 1, cyclin H assembly factor (Xenopus laevis)   | -1.50 | TCGGTGTAAAGACCACCAATA  | NM_002431: | NM_002431:                           |
| 84057  | MND1     | meiotic nuclear divisions 1 homolog (S. cerevisiae)                   | -0.14 | AAGGATGTACAAAGCTTGTGAA | NM_032117: | NM_032117:                           |
| 84057  | MND1     | meiotic nuclear divisions 1 homolog (S. cerevisiae)                   | -1.77 | CTCATCAAAGTAGGACAATAA  | NM_032117: | NM_032117:                           |
| 55233  | MOBK1B   | MOB1, Mps One Binder kinase activator-like 1B (yeast)                 | 1.12  | AACCTGTAGCTTATAAATTTA  | NM_018221: | NM_018221:                           |
| 55233  | MOBK1B   | MOB1, Mps One Binder kinase activator-like 1B (yeast)                 | 1.24  | CAGGGTTTATGCCCATATTTA  | NM_018221: | NM_018221:                           |
| 4338   | MOC2S    | molybdenum cofactor synthesis 2                                       | 0.08  | CTGGGAGAGCATTTGTTATTTA | NM_004531: | NM_176806:NM_183418:NM_004531:       |
| 4338   | MOC2S    | molybdenum cofactor synthesis 2                                       | 0.30  | TAGGATGAAGGGTTATTTAAA  | NM_004531: | NM_176806:NM_183418:NM_004531:       |
| 27304  | MOC3S    | molybdenum cofactor synthesis 3                                       | 0.74  | ATCGTTTAAATGCACTACTAT  | NM_014484: | NM_014484:                           |
| 27304  | MOC3S    | molybdenum cofactor synthesis 3                                       | 0.83  | TCCCGAGATCTTTAAAGTTTA  | NM_014484: | NM_014484:                           |
| 27136  | MORC1    | MORC family CW-type zinc finger 1                                     | -3.63 | CCGATGGAAGATGTGAATCTA  | NM_014429: | NM_014429:                           |
| 27136  | MORC1    | MORC family CW-type zinc finger 1                                     | -0.82 | CACCGGATCAATAATAGAAA   | NM_014429: | NM_014429:                           |
| 79710  | MORC4    | MORC family CW-type zinc finger 4                                     | -2.71 | CAGAGGTAGCACAAACATAAA  | NM_024657: | NM_024657:                           |
| 79710  | MORC4    | MORC family CW-type zinc finger 4                                     | 0.65  | CTGGATTGAATACAAGCAAAA  | NM_024657: | NM_024657:                           |
| 79906  | MORN1    | MORN repeat containing 1                                              | -2.70 | CTCGGTGTGAATGGAAGGAAAT | NM_024848: | NM_024848:                           |
| 79906  | MORN1    | MORN repeat containing 1                                              | 0.80  | CCCATTTGGGTGCAATGTCAT  | NM_024848: | NM_024848:                           |
| 378464 | MORN2    | MORN repeat containing 2                                              | -2.20 | CAGTATATGAAGGCAATTTA   | NM_194270: | NM_194270:                           |
| 378464 | MORN2    | MORN repeat containing 2                                              | 1.99  | AAGGACAATTTAAGGATAATA  | NM_194270: | NM_194270:                           |
| 283385 | MORN3    | MORN repeat containing 3                                              | 0.42  | CAGGCTGGTGGAAAGGTGATA  | NM_173855: | NM_173855:                           |
| 283385 | MORN3    | MORN repeat containing 3                                              | 0.60  | ATGCATGAGAATAAAGAAATA  | NM_173855: | NM_173855:                           |
| 4342   | MOS      | v-mos Moloney murine sarcoma viral oncogene homolog                   | -0.42 | CGCGAAGATCTTGTATCAGTGA | NM_005372: | NM_005372:                           |
| 4342   | MOS      | v-mos Moloney murine sarcoma viral oncogene homolog                   | 1.39  | CTCGGTGTACAAAGGCGACTTA | NM_005372: | NM_005372:                           |
| 26002  | MOXD1    | monooxygenase, DBH-like 1                                             | 0.01  | CAGCAAGATTTACCATCTAGAA | NM_015529: | NM_015529:                           |
| 26002  | MOXD1    | monooxygenase, DBH-like 1                                             | -0.26 | CAGGAGGGTGTAAAGTCTGAAA | NM_015529: | NM_015529:                           |
| 4350   | MPG      | N-methylpurine-DNA glycosylase                                        | -1.48 | CAACCGAGGATGTTTCATGAAA | NM_002434: | NM_001031699:NM_015529:              |
| 4350   | MPG      | N-methylpurine-DNA glycosylase                                        | -0.20 | CAGGGTGTGTCGCTCATAAA   | NM_002434: | NM_002434:                           |
| 9585   | MPHOSPH1 | M-phase phosphoprotein 1                                              | 0.37  | GAGAAGATAGTGAACCTTCAA  | NM_016195: | NM_016195:                           |
| 9585   | MPHOSPH1 | M-phase phosphoprotein 1                                              | 0.06  | ATGCGTGTAGGAGTAAATTA   | NM_016195: | NM_016195:                           |
| 4352   | MPL      | myeloproliferative leukemia virus oncogene                            | 0.85  | CCCGGTACTGTTCCACAGCTA  | NM_005373: | NM_005373:                           |
| 4352   | MPL      | myeloproliferative leukemia virus oncogene                            | -0.61 | CCGCGATCTCGCTACCCTTTA  | NM_005373: | NM_005373:                           |
| 339501 | MPN2     | marapsin 2                                                            | 0.00  | AAGATCATTAAATTTACAAA   | NM_183062: | NM_183062:                           |
| 339501 | MPN2     | marapsin 2                                                            | -2.39 | GAGATTTGATAAGATCATTAA  | NM_183062: | NM_183062:                           |
| 4353   | MPO      | (myeloperoxidase)                                                     | -1.73 | AGGCATCACCACCGTGTCTAA  | NM_000250: | NM_000250:                           |
| 4353   | MPO      | (myeloperoxidase)                                                     | 0.63  | CTCATGTATGTGCGAAGTATA  | NM_000250: | NM_000250:                           |
| 4354   | MPP1     | membrane protein, palmitoylated 1, 55kDa                              | 0.00  | CCCGCTTGTCTTAAAGACAAA  | NM_002436: | NM_002436:                           |
| 4354   | MPP1     | membrane protein, palmitoylated 1, 55kDa                              | -1.46 | ATGGGAAGGAGTACCACCTTTA | NM_002436: | NM_002436:                           |
| 4355   | MPP2     | membrane protein, palmitoylated 2 (MAGUK p55 subfamily member 2       | 1.02  | CCAGTCTTCCAAGTGTCTAA   | NM_005374: | NM_005374:                           |
| 4355   | MPP2     | membrane protein, palmitoylated 2 (MAGUK p55 subfamily member 2       | 0.53  | AACGCGGAGTTTGTCCCTTA   | NM_005374: | NM_005374:                           |
| 4356   | MPP3     | membrane protein, palmitoylated 3 (MAGUK p55 subfamily member 3       | 0.00  | CAGAATTTAAACCCCTATATTA | NM_001932: | NM_001932:                           |
| 4356   | MPP3     | membrane protein, palmitoylated 3 (MAGUK p55 subfamily member 3       | 1.12  | CCAGGAGGAGAGTACGCTTAA  | NM_001932: | NM_001932:                           |
| 58538  | MPP4     | membrane protein, palmitoylated 4 (MAGUK p55 subfamily member 4       | 0.79  | TACGGTCAAGAGTCTTTATA   | NM_033066: | NM_033066:                           |
| 58538  | MPP4     | membrane protein, palmitoylated 4 (MAGUK p55 subfamily member 4       | 1.02  | TCGAGGCAATCATGTTTCAA   | NM_033066: | NM_033066:                           |
| 64398  | MPP5     | membrane protein, palmitoylated 5 (MAGUK p55 subfamily member 5       | 1.46  | GAGGTCTTACCATTTAATATA  | NM_022474: | NM_022474:                           |
| 64398  | MPP5     | membrane protein, palmitoylated 5 (MAGUK p55 subfamily member 5       | -0.61 | TTGAGGGTATTGGGCAACAAA  | NM_022474: | NM_022474:                           |
| 51678  | MPP6     | membrane protein, palmitoylated 6 (MAGUK p55 subfamily member 6       | 1.96  | TGGAAAGGTGACTAATATATA  | NM_016447: | NM_016447:                           |
| 51678  | MPP6     | membrane protein, palmitoylated 6 (MAGUK p55 subfamily member 6       | 0.19  | CTGATGATTCAGTAAGGTTAA  | NM_016447: | NM_016447:                           |
| 143098 | MPP7     | membrane protein, palmitoylated 7 (MAGUK p55 subfamily member 7       | -0.65 | ATGATTAATCTGCACAGATA   | NM_173496: | NM_173496:                           |
| 143098 | MPP7     | membrane protein, palmitoylated 7 (MAGUK p55 subfamily member 7       | 0.82  | CTCCATCAATAGAGGCTTTGA  | NM_173496: | NM_173496:                           |
| 4357   | MPST     | mercaptopyruvate sulfurtransferase                                    | 0.04  | AACCAAGTGCATAATCTGTGA  | NM_021126: | NM_001013440:NM_021126:NM_001013436: |
| 4357   | MPST     | mercaptopyruvate sulfurtransferase                                    | 0.91  | CAGGAATCCGTTGACTGTTT   | NM_021126: | NM_001013440:NM_021126:NM_001013436: |
| 4359   | MPZ      | myelin protein zero (Charcot-Marie-Tooth neuropathy 1B)               | -6.24 | CCAAATGCTCTTAAAGTCTTA  | NM_000530: | NM_000530:                           |
| 4359   | MPZ      | myelin protein zero (Charcot-Marie-Tooth neuropathy 1B)               | 0.85  | AGGGTTTATTTAGGTTATTTA  | NM_000530: | NM_000530:                           |
| 9019   | MPZL1    | myelin protein zero-like 1                                            | 0.42  | AAGGCATTTACTAGAGATTGA  | NM_024569: | NM_003953:NM_024569:                 |
| 9019   | MPZL1    | myelin protein zero-like 1                                            | -1.71 | CACCTCTTTATAAAGCGTCA   | NM_024569: | NM_003953:NM_024569:                 |
| 22808  | MRAS     | muscle RAS oncogene homolog                                           | -4.53 | CACCTCTATAAGCTAGTCAA   | NM_012219: | NM_012219:                           |
| 22808  | MRAS     | muscle RAS oncogene homolog                                           | -2.01 | CAGAAGTAAATGGAACTGTGA  | NM_012219: | NM_012219:                           |
| 9902   | MRC2     | mannose receptor, C type 2                                            | 0.16  | CCGACCGAGCAACATATCCAA  | NM_006039: | NM_006039:                           |
| 9902   | MRC2     | mannose receptor, C type 2                                            | -3.87 | CTCCGGAACCGGCTATTCAA   | NM_006039: | NM_006039:                           |
| 4361   | MRE11A   | MRE11 meiotic recombination 11 homolog A (S. cerevisiae)              | 0.64  | AAGGGTATTGAGCAAGTAA    | NM_005590: | NM_005590:NM_005591:                 |
| 4361   | MRE11A   | MRE11 meiotic recombination 11 homolog A (S. cerevisiae)              | -0.52 | CACATCTTTATTGAACCTGAA  | NM_005590: | NM_005590:NM_005591:                 |
| 116512 | MRGPRD   | MAS-related GPR, member D                                             | -0.85 | CACGCCTCTCCTCGTCCGTA   | NM_198923: | NM_198923:                           |
| 116512 | MRGPRD   | MAS-related GPR, member D                                             | 0.29  | CAGCAAGTCTTGAATTTCAA   | NM_198923: | NM_198923:                           |
| 116534 | MRGPRE   | MAS-related GPR, member E                                             | -0.85 | CAGCTCCAATGTCTACAGAAA  | XM_171536: | XM_171536:                           |
| 116534 | MRGPRE   | MAS-related GPR, member E                                             | -2.57 | CCAGGAGGATGTGGCCCTCAA  | XM_171536: | XM_171536:                           |
| 219928 | MRGPRF   | MAS-related GPR, member F                                             | 0.01  | CAGGAGGAGAAAGATCTGTTT  | NM_145015: | NM_145015:                           |
| 219928 | MRGPRF   | MAS-related GPR, member F                                             | -0.68 | TAAGGCATTACTAGTAGCAA   | NM_145015: | NM_145015:                           |
| 259249 | MRGPRX1  | MAS-related GPR, member X1                                            | -1.15 | CACGTGGACAGGGAAGTCTTA  | NM_147199: | NM_147199:                           |
| 259249 | MRGPRX1  | MAS-related GPR, member X1                                            | -1.30 | CGCTTATATATTCCTGTTA    | NM_147199: | NM_147199:                           |
| 117194 | MRGPRX2  | MAS-related GPR, member X2                                            | 1.30  | ATCAATGTCAACACATATTTA  | NM_054030: | NM_054030:                           |
| 117194 | MRGPRX2  | MAS-related GPR, member X2                                            | -1.60 | CCGAAGACTGGGAGCATTTA   | NM_054030: | NM_054030:                           |
| 117195 | MRGPRX3  | MAS-related GPR, member X3                                            | 1.91  | AACGTGAGTTTCAATACATA   | NM_054031: | NM_054031:                           |
| 117195 | MRGPRX3  | MAS-related GPR, member X3                                            | -0.96 | CAGGATCCACCTGGATTGAAA  | NM_054031: | NM_054031:                           |
| 117196 | MRGPRX4  | MAS-related GPR, member X4                                            | -0.36 | CACCTGAATTTGGAAGTCTTA  | NM_054032: | NM_054032:                           |
| 117196 | MRGPRX4  | MAS-related GPR, member X4                                            | 1.54  | CCTGAATTTGGAAGTCTTTATA | NM_054032: | NM_054032:                           |
| 23164  | M-RIP    | myosin phosphatase-Rho interacting protein                            | -1.96 | AAGCGGACTTCCACCAATGAA  | NM_015134: | NM_201274:NM_015134:                 |
| 23164  | M-RIP    | myosin phosphatase-Rho interacting protein                            | -0.02 | CCGACCAACAAAGCAGAATCA  | NM_015134: | NM_201274:NM_015134:                 |
| 6150   | MRPL23   | mitochondrial ribosomal protein L23                                   | 0.92  | CAGTCCCGACCACTAAATAAA  | NM_021134: | NM_021134:                           |
| 6150   | MRPL23   | mitochondrial ribosomal protein L23                                   | 0.24  | CCGACCAACTCTTCAATTTAA  | NM_021134: | NM_021134:                           |
| 11222  | MRPL3    | mitochondrial ribosomal protein L3                                    | 0.34  | CACATTAATAATATGAGTTAA  | NM_007208: | NM_007208:                           |
| 11222  | MRPL3    | mitochondrial ribosomal protein L3                                    | 1.64  | CCGCGAAACAGACAGTTAAA   | NM_007208: | NM_007208:                           |
| 51318  | MRPL35   | (mitochondrial ribosomal protein L35                                  | 0.29  | CAGAGTAAACTCTTAGATAAA  | NM_016622: | NM_145644:NM_016622:                 |
| 51318  | MRPL35   | (mitochondrial ribosomal protein L35                                  | 1.34  | CCAGAGTAAACTCTTAGATAAA | NM_016622: | NM_145644:NM_016622:                 |
| 6183   | MRPS12   | mitochondrial ribosomal protein S12                                   | -1.69 | CAGGACCACTAATAAGCCATA  | NM_021107: | NM_033363:NM_033362:NM_021107:       |
| 6183   | MRPS12   | mitochondrial ribosomal protein S12                                   | -0.32 | TTCCATCAGGACCACTATTAA  | NM_021107: | NM_033363:NM_033362:NM_021107:       |
| 51373  | MRPS17   | mitochondrial ribosomal protein S17                                   | -8.36 | CAGGCTTGTCTGGATCCCTCA  | NM_015969: | NM_015969:                           |

|        |                                                              |                                                                   |       |                        |            |                                          |
|--------|--------------------------------------------------------------|-------------------------------------------------------------------|-------|------------------------|------------|------------------------------------------|
| 51373  | MRPS17                                                       | mitochondrial ribosomal protein S17                               | 0.97  | TCCCTATTTAAAGTATTT     | NM_015969: | NM_015969:                               |
| 28957  | MRPS28                                                       | mitochondrial ribosomal protein S28                               | 0.29  | TGCAATTAGACTAATGTGAA   | NM_014018: | NM_014018:                               |
| 28957  | MRPS28                                                       | mitochondrial ribosomal protein S28                               | 0.19  | TTGGCGCTATTAGATCTTGAA  | NM_014018: | NM_014018:                               |
| 931    | MSA1                                                         | membrane-spanning 4-domains, subfamily A, member 1                | -2.07 | CACCATATATTAACATATACA  | NM_021950: | NM_152866:NM_021950:                     |
| 931    | MSA1                                                         | membrane-spanning 4-domains, subfamily A, member 1                | 0.01  | TTCAATCATGGACATACATTA  | NM_021950: | NM_152866:NM_021950:                     |
| 341116 | MSA10                                                        | membrane-spanning 4-domains, subfamily A, member 10               | 1.23  | TACATTGATGGTTTACATCAA  | NM_206893: | NM_206893:                               |
| 341116 | MSA10                                                        | membrane-spanning 4-domains, subfamily A, member 10               | 0.67  | AGCGATGGTCTATACAGCAAA  | NM_206893: | NM_206893:                               |
| 54860  | MSA12                                                        | membrane-spanning 4-domains, subfamily A, member 12               | 0.47  | CAACCGGGTCAAGGAAATATA  | NM_017716: | NM_017716:                               |
| 54860  | MSA12                                                        | membrane-spanning 4-domains, subfamily A, member 12               | -0.11 | ATGCAACAACACTACTAGCTAA | NM_017716: | NM_017716:                               |
| 2206   | MSA2                                                         | membrane-spanning 4-domains, subfamily A, member 2 (Fc fragment   | 0.86  | CAAGATTTAGGTACTTATCAA  | NM_000139: | NM_000139:                               |
| 2206   | MSA2                                                         | membrane-spanning 4-domains, subfamily A, member 2 (Fc fragment   | 1.86  | GAGAGTATTAGTCACAATTA   | NM_000139: | NM_000139:                               |
| 932    | MSA3                                                         | membrane-spanning 4-domains, subfamily A, member 3 (hematopoiet   | -0.87 | CACACATGCCCTGATATGTAA  | NM_006138: | NM_006138:NM_001031666:NM_001031809:     |
| 932    | MSA3                                                         | membrane-spanning 4-domains, subfamily A, member 3 (hematopoiet   | 0.79  | TAGGTGTAATAAACAACATA   | NM_006138: | NM_006138:NM_001031666:NM_001031809:     |
| 51338  | MSA4A                                                        | membrane-spanning 4-domains, subfamily A, member 4                | 0.82  | CCGTGTATATCGGGTACACAA  | NM_024021: | NM_024021:NM_148975:                     |
| 51338  | MSA4A                                                        | membrane-spanning 4-domains, subfamily A, member 4                | -0.62 | CTGGCATAATATATCTTAA    | NM_024021: | NM_024021:NM_148975:                     |
| 64232  | MSA5                                                         | membrane-spanning 4-domains, subfamily A, member 5                | 0.39  | GAGGATTTGTGATTGTGAACAA | NM_023945: | NM_023945:                               |
| 64232  | MSA5                                                         | membrane-spanning 4-domains, subfamily A, member 5                | -1.56 | AAGAACATGGCTAGACTGAA   | NM_023945: | NM_023945:                               |
| 64231  | MSA6A                                                        | membrane-spanning 4-domains, subfamily A, member 6A               | -1.27 | ACCGTGTATGGGACTGAGAAA  | NM_022349: | NM_152851:NM_022349:NM_152852:           |
| 64231  | MSA6A                                                        | membrane-spanning 4-domains, subfamily A, member 6A               | 1.33  | TAGTTAATCATGAGAAATCAA  | NM_022349: | NM_022349:                               |
| 245802 | MSA6E                                                        | membrane-spanning 4-domains, subfamily A, member 6E               | -0.90 | ACGGAGAATAATTAATGGAA   | NM_139249: | NM_139249:                               |
| 245802 | MSA6E                                                        | membrane-spanning 4-domains, subfamily A, member 6E               | -0.09 | AAGCATTTAAAGTAAATGCATA | NM_139249: | NM_139249:                               |
| 58475  | MSA47                                                        | membrane-spanning 4-domains, subfamily A, member 7                | -2.97 | CACGGTCTGGATATAAGTAA   | NM_021201: | NM_206940:NM_206938:NM_206939:NM_021201: |
| 58475  | MSA47                                                        | membrane-spanning 4-domains, subfamily A, member 7                | 0.02  | CACACTCATATGGCTTAAATA  | NM_021201: | NM_206940:NM_206938:NM_206939:NM_021201: |
| 83661  | MSA8B                                                        | membrane-spanning 4-domains, subfamily A, member 8B               | 1.02  | CCACCTAGTTGGTGTGCGAA   | NM_031457: | NM_031457:                               |
| 83661  | MSA8B                                                        | membrane-spanning 4-domains, subfamily A, member 8B               | 1.43  | ACGAATGAACTGAGCTCTAA   | NM_031457: | NM_031457:                               |
| 9242   | MSC                                                          | musculin (activated B-cell factor-1)                              | 1.34  | ACCGCTTAATCGGACTGGAA   | NM_005098: | NM_005098:                               |
| 9242   | MSC                                                          | musculin (activated B-cell factor-1)                              | 0.38  | CGGCTCATACCCGCTTAA     | NM_005098: | NM_005098:                               |
| 343930 | MSGN1                                                        | mesogenin 1                                                       | -5.61 | GAGGTGGACTACAATATGTTA  | XM_292850: | XM_292850:                               |
| 343930 | MSGN1                                                        | mesogenin 1                                                       | -1.36 | CACCAAGATCCAGACACTCAA  | XM_292850: | XM_292850:                               |
| 4436   | MSH2                                                         | mutS homolog 2, colon cancer, nonpolyposis type 1 (E. coli)       | 2.04  | CCCATGGGCTCAACTTAA     | NM_000251: | NM_000251:                               |
| 4436   | MSH2                                                         | mutS homolog 2, colon cancer, nonpolyposis type 1 (E. coli)       | 0.04  | TCCAGGCATGGTGTGGAA     | NM_000251: | NM_000251:                               |
| 4437   | MSH3 (mutS)                                                  | mutS homolog 3 (E. coli)                                          | 1.08  | CAGCAAGGAGTATGAGTTAA   | NM_002439: | NM_002439:                               |
| 4437   | MSH3 (mutS)                                                  | mutS homolog 3 (E. coli)                                          | -2.56 | CCGTGATAATACAAATACATA  | NM_002439: | NM_002439:                               |
| 4438   | MSH4 (mutS)                                                  | mutS homolog 4 (E. coli)                                          | 0.94  | ATGCAGTGAGGCTCAACATA   | NM_002440: | NM_002440:                               |
| 4438   | MSH4 (mutS)                                                  | mutS homolog 4 (E. coli)                                          | -1.15 | TCGCTCATATTAATGATGAA   | NM_002440: | NM_002440:                               |
| 4439   | MSH5                                                         | mutS homolog 5 (E. coli)                                          | -3.63 | AAGAAAGATATGTTCTTTA    | NM_002441: | NM_002441:NM_172166:NM_172165:NM_025259: |
| 4439   | MSH5                                                         | mutS homolog 5 (E. coli)                                          | 2.27  | CACCTTCATGATCGACCTCAA  | NM_002441: | NM_002441:NM_172166:NM_172165:NM_025259: |
| 2956   | MSH6                                                         | mutS homolog 6 (E. coli)                                          | 0.35  | ATCGCCATTTGTCGAGATTA   | NM_000179: | NM_000179:                               |
| 2956   | MSH6                                                         | mutS homolog 6 (E. coli)                                          | 0.00  | CCGAAGTTGTAGAGCTCTAA   | NM_000179: | NM_000179:                               |
| 55167  | MSL2L1                                                       | male-specific lethal 2-like 1 (Drosophila)                        | 1.22  | AGGGCTTGATGTTTATGTA    | NM_018133: | NM_018133:                               |
| 55167  | MSL2L1                                                       | male-specific lethal 2-like 1 (Drosophila)                        | 1.34  | CAGTGTCTTATGAAACATGTA  | NM_018133: | NM_018133:                               |
| 10232  | MSLN                                                         | mesothelin                                                        | -0.69 | CTGGCCTGACTAAACGGGAA   | NM_005823: | NM_005823:NM_013404:                     |
| 10232  | MSLN                                                         | mesothelin                                                        | -0.31 | CGGGTCCGAATCTCTGGTAA   | NM_005823: | NM_005823:NM_013404:                     |
| 4478   | MSN                                                          | (moesin moesin                                                    | -0.17 | CAGGATGTCAACTGACCTAA   | NM_002444: | NM_002444:                               |
| 4478   | MSN                                                          | (moesin moesin                                                    | -9.97 | GACGAATTTGAGTCTATGTA   | NM_002444: | NM_002444:                               |
| 4481   | MSR1                                                         | macrophage scavenger receptor 1                                   | -0.26 | ATGGTTTGTCAATAGTATTA   | NM_138715: | NM_138715:NM_138715:                     |
| 4481   | MSR1                                                         | macrophage scavenger receptor 1                                   | 1.21  | AACTATGAAATCGCTGCTCAA  | NM_138715: | NM_138715:NM_138715:                     |
| 4485   | MS1                                                          | macrophage stimulating 1 (hepatocyte growth factor-like)          | 0.10  | CCGGCAAGTCTCCGACCAA    | NM_020998: | NM_020998:                               |
| 4485   | MS1                                                          | macrophage stimulating 1 (hepatocyte growth factor-like)          | -1.54 | TCGCCATGAAATGACTCCCAA  | NM_020998: | NM_020998:                               |
| 4486   | MST1R                                                        | macrophage stimulating 1 receptor (c-met-related tyrosine kinase) | -0.02 | ATGGAGCATCCTCTCCGATA   | NM_002447: | NM_002447:                               |
| 4486   | MST1R                                                        | macrophage stimulating 1 receptor (c-met-related tyrosine kinase) | 0.71  | TGCCATTAAGTTGAGTATAT   | NM_002447: | NM_002447:                               |
| 4487   | MSX1                                                         | msh homeobox homolog 1 (Drosophila)                               | -1.58 | CACAGATGTGTGCAAAAGGTA  | NM_002448: | NM_002448:                               |
| 4487   | MSX1                                                         | msh homeobox homolog 1 (Drosophila)                               | 0.01  | CAGCCAGGAAGATGAATCCTA  | NM_002448: | NM_002448:                               |
| 4488   | MSX2                                                         | msh homeobox homolog 2 (Drosophila)                               | 1.00  | CTAAATTTCTTGAACAATTA   | NM_002449: | NM_002449:                               |
| 4488   | MSX2                                                         | msh homeobox homolog 2 (Drosophila)                               | 0.44  | AACCATTAACCTATATGCTAAA | NM_002449: | NM_002449:                               |
| 9112   | MTA1                                                         | (metas metastasis associated 1                                    | -0.89 | CAGGTCGGAGACTACGCTCTA  | NM_004689: | NM_004689:                               |
| 9112   | MTA1                                                         | (metas metastasis associated 1                                    | -0.81 | GGCATCTTTGTTGACATATT   | NM_004689: | NM_004689:                               |
| 9219   | MTA2                                                         | metastasis associated 1 family, member 2                          | -1.65 | ACGCCAGTCTCTCAGAAATAAA | NM_004739: | NM_004739:                               |
| 9219   | MTA2                                                         | metastasis associated 1 family, member 2                          | -1.18 | CAGCCAAGCGTCGAAACTAA   | NM_004739: | NM_004739:                               |
| 4507   | MTAP                                                         | methylthioadenosine phosphorylase                                 | -2.70 | CACAATCTGGCTCAATGTATA  | NM_002451: | NM_002451:                               |
| 4507   | MTAP                                                         | methylthioadenosine phosphorylase                                 | 1.45  | ATGGTTTAGGAAGTCACGAAA  | NM_002451: | NM_002451:                               |
| 22823  | MTF2                                                         | metal response element binding transcription factor 2             | -1.50 | TGGGTTGACACTTGATGGAAA  | NM_007358: | NM_007358:                               |
| 22823  | MTF2                                                         | metal response element binding transcription factor 2             | -1.02 | CAGGAGTTACAACCTCAATCAT | NM_007358: | NM_007358:                               |
| 4522   | MTHFD1                                                       | methylenetetrahydrofolate dehydrogenase (NADP+ dependent) 1, mei  | 1.28  | ATCGTTTGGCCATCAGTAA    | NM_005956: | NM_005956:                               |
| 4522   | MTHFD1                                                       | methylenetetrahydrofolate dehydrogenase (NADP+ dependent) 1, mei  | 0.29  | CAGATCACCATCCTCTTCAA   | NM_005956: | NM_005956:                               |
| 10797  | MTHFD2                                                       | methylenetetrahydrofolate dehydrogenase (NADP+ dependent) 2, mei  | -6.85 | CTCGCGCAGTTCGAAATGAA   | NM_006636: | NM_006636:                               |
| 10797  | MTHFD2                                                       | methylenetetrahydrofolate dehydrogenase (NADP+ dependent) 2, mei  | -0.02 | TAGGATTAATCCCTTGCTATTA | NM_006636: | NM_006636:                               |
| 4524   | MTHFR (5,10,5,10-methylenetetrahydrofolate reductase (NADPH) |                                                                   | -4.67 | TGCCCTTAACCTTATCTAGAA  | NM_005957: | NM_005957:                               |
| 4524   | MTHFR (5,10,5,10-methylenetetrahydrofolate reductase (NADPH) |                                                                   | 1.01  | AACCTAGTACTCTCTGCTCTA  | NM_005957: | NM_005957:                               |
| 9633   | MTL5                                                         | metallothionein-like 5, testis-specific (tesmin)                  | 0.98  | CCCACTGAGTTTAAATCTAA   | NM_004923: | NM_004923:                               |
| 9633   | MTL5                                                         | metallothionein-like 5, testis-specific (tesmin)                  | 0.52  | CCCAATATGTGTCTTCTCTA   | NM_004923: | NM_004923:                               |
| 4534   | MTM1                                                         | myotubularin 1                                                    | 1.52  | CGAATAGGTCATGGTGATAAA  | NM_000252: | NM_000252:                               |
| 4534   | MTM1                                                         | myotubularin 1                                                    | -1.10 | TGGGTATGAGTGGGAAACGAA  | NM_000252: | NM_000252:                               |
| 8776   | MTMR1                                                        | (myo myotubularin related protein 1                               | -0.05 | CTGGCTGACTAGGACTGTAA   | NM_003828: | NM_003828:NM_176789:                     |
| 8776   | MTMR1                                                        | (myo myotubularin related protein 1                               | 0.87  | ACGCATTTGGCTGGAATATATA | NM_003828: | NM_003828:NM_176789:                     |
| 54545  | MTMR12                                                       | myotubularin related protein 12                                   | -2.56 | CAGGCTATGGCATACCAATA   | NM_019061: | NM_019061:                               |
| 54545  | MTMR12                                                       | myotubularin related protein 12                                   | 0.98  | TGGGATGTGGATATATGCTTAA | NM_019061: | NM_019061:                               |
| 8898   | MTMR2                                                        | myotubularin related protein 2                                    | -0.39 | AACGATATGAACCTTTGTGATA | NM_016156: | NM_201281:NM_201278:NM_016156:           |
| 8898   | MTMR2                                                        | myotubularin related protein 2                                    | 0.51  | CTGAGGGAGTCTCAACAAGTTA | NM_016156: | NM_201281:NM_201278:NM_016156:           |
| 8897   | MTMR3                                                        | myotubularin related protein 3                                    | 0.00  | GACCCCTTATACCGAACCATTA | NM_021090: | NM_153050:NM_153051:NM_021090:           |
| 8897   | MTMR3                                                        | myotubularin related protein 3                                    | 0.81  | TTGCCCTTAGCCGAATGTAAA  | NM_021090: | NM_153050:NM_153051:NM_021090:           |
| 9110   | MTMR4                                                        | myotubularin related protein 4                                    | 0.14  | TGGGACTGGAGAGTACCCAAA  | NM_004687: | NM_004687:                               |
| 9110   | MTMR4                                                        | myotubularin related protein 4                                    | 0.50  | TTGCCATAGATGTAACTTAA   | NM_004687: | NM_004687:                               |
| 9107   | MTMR6                                                        | (myo myotubularin related protein 6                               | 0.82  | CCCGATAGCAAGCAACCAA    | NM_004685: | NM_004685:                               |
| 9107   | MTMR6                                                        | (myo myotubularin related protein 6                               | 0.22  | CCCGTAAATGATGCTCTCGA   | NM_004685: | NM_004685:                               |
| 55613  | MTMR8                                                        | myotubularin related protein 8                                    | 0.02  | CAGCCCAAGCAGAGTATGCTA  | NM_017677: | NM_017677:                               |
| 55613  | MTMR8                                                        | myotubularin related protein 8                                    | 0.15  | CGGGAAGATCTAAGAGTCTAT  | NM_017677: | NM_017677:                               |
| 66036  | MTMR9                                                        | myotubularin related protein 9                                    | 0.99  | CAGACCTAGTATTCTAAGTTA  | NM_015458: | NM_015458:                               |
| 66036  | MTMR9                                                        | myotubularin related protein 9                                    | 0.90  | CAGGTCTAAGGATTAACATA   | NM_015458: | NM_015458:                               |
| 4543   | MTNR1A                                                       | melatonin receptor 1A                                             | -7.31 | CACAGTCTCAAGTACGACAAA  | NM_005958: | NM_005958:                               |
| 4543   | MTNR1A                                                       | melatonin receptor 1A                                             | 0.47  | GAGGGTGAAACCTGACCGCAA  | NM_005958: | NM_005958:                               |
| 4544   | MTNR1B                                                       | melatonin receptor 1B                                             | -3.99 | AACCCACGCACTGATTCAA    | NM_005959: | NM_005959:                               |
| 4544   | MTNR1B                                                       | melatonin receptor 1B                                             | -0.59 | CACACTGCTACTACTGGCTTA  | NM_005959: | NM_005959:                               |
| 25821  | MTO1                                                         | mitochondrial translation optimization 1 homolog (S. cerevisiae)  | 2.75  | CAATACAACAGTATAGATAAA  | NM_012123: | NM_133645:NM_012123:                     |
| 25821  | MTO1                                                         | mitochondrial translation optimization 1 homolog (S. cerevisiae)  | -3.33 | CCAAGACTGATCAATCTTAT   | NM_012123: | NM_133645:NM_012123:                     |

|            |               |                                                                   |       |                        |               |                                                                                                                                                                    |
|------------|---------------|-------------------------------------------------------------------|-------|------------------------|---------------|--------------------------------------------------------------------------------------------------------------------------------------------------------------------|
| 4548       | MTR           | 5-methyltetrahydrofolate-homocysteine methyltransferase           | 0.34  | TTGGGATATGATACAGACTAA  | NM_000254:    | NM_000254:                                                                                                                                                         |
| 4548       | MTR           | 5-methyltetrahydrofolate-homocysteine methyltransferase           | -0.15 | CCCAAGATATTTACAGCAAAA  | NM_000254:    | NM_000254:                                                                                                                                                         |
| 4552       | MTRR          | 5-methyltetrahydrofolate-homocysteine methyltransferase reductase | -0.01 | ATGCCCTTGTGCAAAATATA   | NM_002454:    | NM_002454;NM_024010:                                                                                                                                               |
| 4552       | MTRR          | 5-methyltetrahydrofolate-homocysteine methyltransferase reductase | 0.10  | TCCCATGAAGACAGCGGGAAA  | NM_002454:    | NM_002454;NM_024010:                                                                                                                                               |
| 9788       | MTSS1         | metastasis suppressor 1                                           | -4.08 | CCGACGGATGTTCCAAGCCAA  | NM_014751:    | NM_014751:                                                                                                                                                         |
| 9788       | MTSS1         | metastasis suppressor 1                                           | 1.24  | CCGTATGGTCATTGTCTATA   | NM_014751:    | NM_014751:                                                                                                                                                         |
| 4547       | MTPP          | microsomal triglyceride transfer protein                          | 0.76  | AACGTTCTTGTACTTATA     | NM_000253:    | NM_000253:                                                                                                                                                         |
| 4547       | MTPP          | microsomal triglyceride transfer protein                          | 1.64  | CCCGTCCGCATCTACTTACA   | NM_000253:    | NM_000253:                                                                                                                                                         |
| 57509      | MTUS1         | mitochondrial tumor suppressor 1                                  | 0.44  | ATCGCTAGAGAAGCAATCAA   | XM_372031:    | NM_020749;NM_001001924;NM_001001925;NM_01001927;NM_001001931:                                                                                                      |
| 57509      | MTUS1         | mitochondrial tumor suppressor 1                                  | -0.12 | TCCGTATTACGTGACCCGGCAA | XM_372031:    | NM_020749;NM_001001924;NM_001001925;NM_01001927;NM_001001931:                                                                                                      |
| 4582       | MUC1          | mucin 1, transmembrane                                            | -2.43 | ACGCAGTTCAATCAGTATAAA  | NM_002456:    | NM_001018016;NM_002456;NM_001018017;NM_010018021;M_002456:                                                                                                         |
| 4582       | MUC1          | mucin 1, transmembrane                                            | 0.28  | CAGCAGCCTCTCTACACAAA   | NM_002456:    | NM_001004430:                                                                                                                                                      |
| 140453     | MUC17         | mucin 17                                                          | -4.80 | AAGGAACCACTCCGTTAGCAA  | NM_001004430: | NM_001004430:                                                                                                                                                      |
| 140453     | MUC17         | mucin 17                                                          | 0.38  | CTGGGAGATTCTCAAATAGAA  | NM_001004430: | NM_001004430:                                                                                                                                                      |
| 57876      | MUC3B         | mucin 3B                                                          | -2.17 | CTCCATCAAGGTGAACAACAA  | XM_168578:    | XM_374502;XM_168578:                                                                                                                                               |
| 4585       | MUC4          | mucin 4, tracheobronchial                                         | -1.80 | CTCTGGTTTACTTCAAATTTAA | NM_138297:    | NM_138298;NM_004532;NM_138299;NM_018406:                                                                                                                           |
| 4585       | MUC4          | mucin 4, tracheobronchial                                         | 0.19  | CTCATCCTTACCGCACATTTA  | NM_138297:    | NM_138297:                                                                                                                                                         |
| 4586       | MUC5AC        | mucin 5, subtypes A and C, tracheobronchial/gastric               | 1.99  | CACCCGGAGGTGAACATTGAA  | XM_495860:    | XM_495860:                                                                                                                                                         |
| 4586       | MUC5AC        | mucin 5, subtypes A and C, tracheobronchial/gastric               | -4.23 | ACCCCTCAAGATGTGCCTCAA  | XM_495860:    | XM_495860:                                                                                                                                                         |
| 4588       | MUC6          | mucin 6, gastric                                                  | 0.38  | CCCGTGCATCTGAGGGTTA    | XM_290540:    | XM_290540:                                                                                                                                                         |
| 4588       | MUC6          | mucin 6, gastric                                                  | -0.14 | CCCGAAGGTACGGCTCTGAA   | XM_290540:    | XM_290540:                                                                                                                                                         |
| 340273;402 | Multiple(ABCI | Annotation yielded more than one identification                   | 0.18  | TTCCAGGTTATTGATAAGAAA  | XM_379995:    | NM_379995;XM_377933;NM_178559:                                                                                                                                     |
| 8038;10348 | Multiple(ADAI | Annotation yielded more than one identification                   | 0.19  | AACCATCTTTAAACAAGCTAA  | NM_022122:    | NM_021641;NM_080282:                                                                                                                                               |
| 117;57035  | Multiple(ADC  | Annotation yielded more than one identification                   | -1.34 | AACCCGTTACTTAGCTGTGA   | NM_002596:    | NM_001118;NM_207035:                                                                                                                                               |
| 1645;1646  | Multiple(AKR  | Annotation yielded more than one identification                   | -1.67 | AAGGTGGAATGTATCCCTTAC  | NM_001353:    | NM_001353;NM_001354;NM_205845:                                                                                                                                     |
| 1645;1646  | Multiple(AKR  | Annotation yielded more than one identification                   | 0.95  | CCGCAAGCTTATGCTCTTATA  | NM_001354:    | NM_001354;NM_205845;NM_001353:                                                                                                                                     |
| 1645;1646  | Multiple(AKR  | Annotation yielded more than one identification                   | 0.14  | AACGGTTGAAGTGGATGCAAT  | NM_001354:    | NM_001354:                                                                                                                                                         |
| 1645;1646; | Multiple(AKR  | Annotation yielded more than one identification                   | -0.34 | AATTGTTCTGGTGCCTATAG   | NM_001353:    | NM_001353;NM_001354;NM_003739;NM_205845:                                                                                                                           |
| 22977;2461 | Multiple(AKR  | Annotation yielded more than one identification                   | -1.97 | AAGCGACTGCAGAGTAAAAAT  | NM_012067:    | NM_012067;NM_201252:                                                                                                                                               |
| 213;51283; | Multiple(ALB  | Annotation yielded more than one identification                   | 0.33  | ACCCTAGAATTTAATCAACAA  | NM_022731:    | NM_000477;NM_016561;NM_016618;NM_152630:                                                                                                                           |
| 262;115950 | Multiple(AMD  | Annotation yielded more than one identification                   | 0.56  | AAGGTGGACCTGTGCTAAA    | NM_001634:    | NM_173557:                                                                                                                                                         |
| 324;199920 | Multiple(APC  | Annotation yielded more than one identification                   | 1.57  | GAGATTTCTTATAAACCAA    | NM_201546:    | NM_001033059;NM_001634;NM_138783;NM_198945:                                                                                                                        |
| 548645;552 | Multiple(bA16 | Annotation yielded more than one identification                   | -0.23 | AACCGCCTACGAGCACTCAA   | NM_004125:    | NM_000038;NM_001004303;NM_001013357;NM_01165;NM_004728;NM_015046;NM_152701;NM_182962;XM_374115;XM_379096:                                                          |
| 85317;8531 | Multiple(BAGI | Annotation yielded more than one identification                   | -0.59 | ATGCGTGGAAATGCAAAATGAA | NM_181704:    | NM_001015882;NM_004125:                                                                                                                                            |
| 552900;592 | Multiple(BOL  | Annotation yielded more than one identification                   | 1.79  | AACCTGAGCTTTAAATGTAA   | NM_031211:    | NM_181704;NM_182482:                                                                                                                                               |
| 701;353324 | Multiple(BUB  | Annotation yielded more than one identification                   | -0.62 | ATGGAAGTGAAGGATAATGTA  | XM_372798:    | NM_001031833;NR_002473;NR_002453:                                                                                                                                  |
| 283651;315 | Multiple(C15c | Annotation yielded more than one identification                   | -1.58 | AAGGGTGGTGTAGAGTTGTT   | NM_003123:    | NM_001211;NM_181727:                                                                                                                                               |
| 400804;597 | Multiple(C1or | Annotation yielded more than one identification                   | 0.67  | TAGCGTAAACATCAGACTGA   | NM_153024:    | NM_001005266;NM_001005267;NM_001005268;NM_001005269;NM_005517;NM_005779;NM_015221;NM_017939;NM_018098;NM_133646;NM_173609;NM_182922;NM_198718;XM_086360;XM_371754: |
| 11238;3405 | Multiple(CA5f | Annotation yielded more than one identification                   | -1.84 | CTCGTGGAAATTTGAAGATTCT | XM_291346:    | XM_373682:                                                                                                                                                         |
| 797;796    | Multiple(CAL  | Annotation yielded more than one identification                   | 0.74  | CCCACCAATGTGGGTTCCAAA  | NM_000728:    | NM_001010913;NM_005612;NM_017873;NM_024989;NM_177999:                                                                                                              |
| 831;10484; | Multiple(CAS  | Annotation yielded more than one identification                   | 0.64  | ATGAGTTCCACCTACTTATA   | NM_001001957: | NM_291346;NM_007220:                                                                                                                                               |
| 117155;440 | Multiple(CAT  | Annotation yielded more than one identification                   | -0.69 | CCCGAGGTTGGTATTGGTA    | NM_172096:    | NM_000728;NM_001033953:                                                                                                                                            |
| 10951;672  | Multiple(CBX  | Annotation yielded more than one identification                   | 1.37  | AAGGTGATTCTGATTCTAGAA  | NM_000456:    | NM_001750;NM_006364;NM_014323;NM_032050:                                                                                                                           |
| 6358;6359  | Multiple(CCL  | Annotation yielded more than one identification                   | 1.14  | CTGCATGGTAACTATTATATA  | NM_004166:    | NM_032052;NM_173060;NM_173062;NM_203349:                                                                                                                           |
| 6358;6359  | Multiple(CCL  | Annotation yielded more than one identification                   | 1.19  | CAGGCTTAGAGGATTAGATTA  | NM_004166:    | NR_002318;NM_172097;NM_172095;NM_172096;NM_054020:                                                                                                                 |
| 414062;634 | Multiple(CCL  | Annotation yielded more than one identification                   | 1.66  | TGGGACTCTCTTAACTTAAA   | NM_002983:    | NM_006807;NM_007294;NM_007295;NM_007296:                                                                                                                           |
| 414062;634 | Multiple(CCL  | Annotation yielded more than one identification                   | 1.07  | TGGGACTCTCTTAACTTAAA   | NM_021006:    | NM_007297;NM_007298;NM_007299;NM_007300;NM_007301:                                                                                                                 |
| 414062;634 | Multiple(CCL  | Annotation yielded more than one identification                   | 0.32  | TGGGACTCTCTTAACTTAAA   | NM_001001437: | NM_007302;NM_007306:                                                                                                                                               |
| 414062;634 | Multiple(CCL  | Annotation yielded more than one identification                   | -3.22 | CAGTGTCACTCTCCTAACCAA  | NM_021006:    | NM_004167;NM_004166;NM_032964;NM_032965:                                                                                                                           |
| 414062;634 | Multiple(CCL  | Annotation yielded more than one identification                   | 0.01  | CAGTGTCACTCTCCTAACCAA  | NM_001001437: | NM_004167;NM_004166;NM_032964;NM_032965:                                                                                                                           |
| 9560;6351; | Multiple(CCL  | Annotation yielded more than one identification                   | 1.44  | TCCATTTTTATTATTAGTTTA  | NM_002984:    | NM_032962:                                                                                                                                                         |
| 9560;6351; | Multiple(CCL  | Annotation yielded more than one identification                   | 0.24  | TCCATTTTTATTATTAGTTTA  | NM_001001435: | NM_002983;NM_021006;NM_001001437:                                                                                                                                  |
| 9560;6351; | Multiple(CCL  | Annotation yielded more than one identification                   | -0.16 | TGGCAACTTGGTGTAGATTA   | NM_001001435: | NM_002983;NM_021006;NM_001001437:                                                                                                                                  |
| 9560;6351; | Multiple(CCL  | Annotation yielded more than one identification                   | 0.80  | TCCATTTTTATTATTAGTTTA  | NM_207007:    | NM_001001435;NM_207007;NM_002984:                                                                                                                                  |
| 9560;6351; | Multiple(CCL  | Annotation yielded more than one identification                   | 1.09  | TGGCAACTTGGTGTAGATTA   | NM_207007:    | NM_001001435;NM_207007;NM_002984:                                                                                                                                  |
| 984;985    | Multiple(CDC  | Annotation yielded more than one identification                   | -4.11 | CAAGATCTACATCGTGATGAA  | NM_033529:    | NM_033493;NM_033488;NM_033489;NM_033486:                                                                                                                           |
| 984;985    | Multiple(CDC  | Annotation yielded more than one identification                   | -2.42 | CAGGATAAAGCTGCCGGGAA   | NM_033529:    | NM_024011;NM_033492;NM_033527;NM_033528:                                                                                                                           |
| 984;985    | Multiple(CDC  | Annotation yielded more than one identification                   | -1.50 | CAAGATCTACATCGTGATGAA  | NM_033487:    | NM_033531;NM_033532;NM_033529;NM_033536:                                                                                                                           |
| 984;985    | Multiple(CDC  | Annotation yielded more than one identification                   | -0.95 | CAGGATAAAGCTGCCGGGAA   | NM_033487:    | NM_033537;NM_033490;NM_033487;NM_001787:                                                                                                                           |
| 1082;93655 | Multiple(CGB  | Annotation yielded more than one identification                   | 0.34  | CCCGAGGATAAAGCCAGGTA   | NM_000737:    | NM_033493;NM_033488;NM_033489;NM_033486:                                                                                                                           |

|                                                                            |       |                        |               |                                                                                                                                                                                                                                                                                                                                                                                                                                                                                                                                           |
|----------------------------------------------------------------------------|-------|------------------------|---------------|-------------------------------------------------------------------------------------------------------------------------------------------------------------------------------------------------------------------------------------------------------------------------------------------------------------------------------------------------------------------------------------------------------------------------------------------------------------------------------------------------------------------------------------------|
| 1082;3972; Multiple(CGB: Annotation yielded more than one identification   | -0.01 | CCCACAATAAAGGCTTCTCAA  | NM_000737:    | NM_033142:NM_033183:NM_033043:NM_000737:<br>NM_033377:NM_033378:NM_000894:<br>NM_033142:NM_033183:NM_033043:NM_000737:<br>NM_033377:NM_033378:NM_000894:                                                                                                                                                                                                                                                                                                                                                                                  |
| 1082;3972; Multiple(CGB: Annotation yielded more than one identification   | 0.17  | CCCACAATAAAGGCTTCTCAA  | NM_000894:    | NM_000894:                                                                                                                                                                                                                                                                                                                                                                                                                                                                                                                                |
| 1119;55576 Multiple(CHK: Annotation yielded more than one identification   | -1.79 | CGGCGCTTACCAAAACCTGAT  | NM_001277:    | NM_001277:NM_017564:NM_212469:                                                                                                                                                                                                                                                                                                                                                                                                                                                                                                            |
| 1120;1375 Multiple(CHKI: Annotation yielded more than one identification   | -0.93 | CACGGAAGATGGCCAAATTTCA | NM_005198:    | NM_005198:NM_152253:NM_152247:<br>NM_372562:NM_497438:NM_372553:NM_497512:NM_000750:NM_497435:NM_497440:NM_497474:NM_497475:                                                                                                                                                                                                                                                                                                                                                                                                              |
| 1143;39054 Multiple(CHRI: Annotation yielded more than one identification  | 0.78  | ATGGACGACCTTCTGAACAAA  | XM_372562:    | XM_372562:NM_020990:NM_020990:NM_001015001:                                                                                                                                                                                                                                                                                                                                                                                                                                                                                               |
| 548596;115 Multiple(CKM: Annotation yielded more than one identification   | -2.44 | ACGGATCTAGATGCCAGTAAA  | NM_020990:    | NM_020990:NM_001015001:                                                                                                                                                                                                                                                                                                                                                                                                                                                                                                                   |
| 548596;115 Multiple(CKM: Annotation yielded more than one identification   | -2.03 | CTGGACGTTACTATAGGCTCA  | NM_020990:    | NM_020990:NM_001015001:                                                                                                                                                                                                                                                                                                                                                                                                                                                                                                                   |
| 1196;1197 Multiple(CLK: Annotation yielded more than one identification    | -1.76 | TGCGCTGGATTGGGATGAGAA  | NM_001291:    | NM_003993:XR_000292:NM_001291:XR_000261:                                                                                                                                                                                                                                                                                                                                                                                                                                                                                                  |
| 1259;2319E Multiple(CNG: Annotation yielded more than one identification   | -0.45 | TAAGTCTTATGTGGTGGTTAA  | NM_030757:    | NM_000087:NM_014611:NM_022143:                                                                                                                                                                                                                                                                                                                                                                                                                                                                                                            |
| 1325;3787C Multiple(COR: Annotation yielded more than one identification   | 0.69  | AAGCTCTGTCTTTGATTTAA   | NM_001302:    | NM_198544:NM_001302:<br>NM_152253:NM_152247:NM_004377:NM_152245:<br>NM_152246:                                                                                                                                                                                                                                                                                                                                                                                                                                                            |
| 1375;1120 Multiple(CPT1: Annotation yielded more than one identification   | -1.91 | CACGTTGTTGCTTGAATAAA   | NM_152246:    | NM_152253:NM_152247:NM_004377:NM_152245:<br>NM_152246:                                                                                                                                                                                                                                                                                                                                                                                                                                                                                    |
| 1375;1120 Multiple(CPT1: Annotation yielded more than one identification   | -2.02 | CTGCCTTACTGTTGCTCCAA   | NM_152246:    | NM_152246:                                                                                                                                                                                                                                                                                                                                                                                                                                                                                                                                |
| 1457;2831C Multiple(CSNI: Annotation yielded more than one identification  | 0.02  | ACCGTTGCTGTGGATTTATA   | NM_001895:    | NM_001895:NM_177560:NR_002207:NM_177559:                                                                                                                                                                                                                                                                                                                                                                                                                                                                                                  |
| 1485;2461C Multiple(CTA: Annotation yielded more than one identification   | -4.12 | CAGGCGTAATGGATGCTGCA   | NM_001327:    | NM_001327:NM_139250:                                                                                                                                                                                                                                                                                                                                                                                                                                                                                                                      |
| 1485;3084E Multiple(CTA: Annotation yielded more than one identification   | 1.46  | TACATGTTGTTTCTGTAGAA   | NM_001327:    | NM_020994:NM_001327:NM_139250:NM_172377:                                                                                                                                                                                                                                                                                                                                                                                                                                                                                                  |
| 56998;7567 Multiple(CTNI: Annotation yielded more than one identification  | -2.00 | CTGGCTGTGGCACCTCACCAA  | NM_012165:    | NM_001012329:NM_006961:NM_020248:                                                                                                                                                                                                                                                                                                                                                                                                                                                                                                         |
| 440387;15C Multiple(CTRI: Annotation yielded more than one identification  | -1.05 | CAGCATTCTGACCGTGAACAA  | NM_001906:    | NM_001906:NM_001025200:                                                                                                                                                                                                                                                                                                                                                                                                                                                                                                                   |
| 440387;15C Multiple(CTRI: Annotation yielded more than one identification  | 0.05  | CAGGAGGATCACCGACGTGAT  | NM_001906:    | NM_001906:NM_001025200:                                                                                                                                                                                                                                                                                                                                                                                                                                                                                                                   |
| 8065;8429E Multiple(CUL: Annotation yielded more than one identification   | 1.00  | ATGGTCACAATAAATAGATA   | NM_152715:    | NM_003478:NM_032458:NM_080745:NM_182985:                                                                                                                                                                                                                                                                                                                                                                                                                                                                                                  |
| 1548;1553 Multiple(CYP: Annotation yielded more than one identification    | -0.68 | TGGGGATTTCCTCCCTAA     | NM_000762:    | NM_000762:NM_000766:                                                                                                                                                                                                                                                                                                                                                                                                                                                                                                                      |
| 1548;1549 Multiple(CYP: Annotation yielded more than one identification    | -6.82 | CACCTTCGACTGGGCTTTCAA  | NM_000762:    | NM_000762:NM_000764:                                                                                                                                                                                                                                                                                                                                                                                                                                                                                                                      |
| 1565;1564 Multiple(CYP: Annotation yielded more than one identification    | 0.00  | GAGGCTCTAATGTACAATAAA  | NM_001002910: | NR_002570:NM_000106:NM_001025161:                                                                                                                                                                                                                                                                                                                                                                                                                                                                                                         |
| 1565;1564 Multiple(CYP: Annotation yielded more than one identification    | 0.44  | CAGGAGATCGACGACGTGATA  | NM_001002910: | NR_002570:NM_000106:NM_001025161:                                                                                                                                                                                                                                                                                                                                                                                                                                                                                                         |
| 1565;1564 Multiple(CYP: Annotation yielded more than one identification    | 0.00  | GAGGCTCTAATGTACAATAAA  | NM_000106:    | NR_002570:NM_000106:NM_001025161:                                                                                                                                                                                                                                                                                                                                                                                                                                                                                                         |
| 1565;1564 Multiple(CYP: Annotation yielded more than one identification    | -0.24 | CAGGAGATCGACGACGTGATA  | NM_000106:    | NR_002570:NM_000106:NM_001025161:                                                                                                                                                                                                                                                                                                                                                                                                                                                                                                         |
| 1551;38917 Multiple(CYP: Annotation yielded more than one identification   | -1.45 | TGGAGCCATGATTATCCACTA  | NM_014627:    | NM_000765:NM_001004316:NM_002093:NM_014949:NM_025080:NM_198990:XM_499124:                                                                                                                                                                                                                                                                                                                                                                                                                                                                 |
| 199974;163 Multiple(CYP: Annotation yielded more than one identification   | -1.40 | CTGGATGGTCTAAATGGAAA   | NM_178134:    | NM_178134:XR_000161:<br>NM_006386:NM_014342:NM_020828:NM_025147:<br>NM_030881:NM_170710:NM_173700:NM_181265:XM_374803:                                                                                                                                                                                                                                                                                                                                                                                                                    |
| 10521;2378 Multiple(DDX: Annotation yielded more than one identification   | -0.12 | CTGGGACTTGTGATATCATA   | NM_152715:    | NM_005217:NM_004084:                                                                                                                                                                                                                                                                                                                                                                                                                                                                                                                      |
| 1667;1668 Multiple(DEF: Annotation yielded more than one identification    | -0.84 | CAGGAGAACGTCGCTATGGAA  | NM_005217:    | NM_005217:NM_004084:                                                                                                                                                                                                                                                                                                                                                                                                                                                                                                                      |
| 1667;1668 Multiple(DEF: Annotation yielded more than one identification    | -1.10 | CAGGAGAACGTCGCTATGGAA  | NM_004084:    | NM_005217:NM_004084:                                                                                                                                                                                                                                                                                                                                                                                                                                                                                                                      |
| 8214;8535E Multiple(DGC: Annotation yielded more than one identification   | 0.61  | ACCGTAGGATAGTCTCATAAA  | NM_005675:    | NM_005675:NM_033257:                                                                                                                                                                                                                                                                                                                                                                                                                                                                                                                      |
| 8214;8535E Multiple(DGC: Annotation yielded more than one identification   | -0.30 | CTGGCCAGAGTTCACTTCTT   | NM_005675:    | NM_005675:NM_033257:                                                                                                                                                                                                                                                                                                                                                                                                                                                                                                                      |
| 10901;3177 Multiple(DHR: Annotation yielded more than one identification   | -0.61 | AAGGAGCAGAGTTGCAAAATTA | NM_021004:    | NM_198083:NM_021004:                                                                                                                                                                                                                                                                                                                                                                                                                                                                                                                      |
| 10901;3177 Multiple(DHR: Annotation yielded more than one identification   | -0.84 | AAGGAGCAGAGTTGCAAAATTA | NM_198083:    | NM_198083:NM_021004:                                                                                                                                                                                                                                                                                                                                                                                                                                                                                                                      |
| 10901;3177 Multiple(DHR: Annotation yielded more than one identification   | -5.34 | AGGAGCAGAGTTGCAAAATTA  | NM_198083:    | NM_198083:NM_021004:                                                                                                                                                                                                                                                                                                                                                                                                                                                                                                                      |
| 60625;160E Multiple(DHX: Annotation yielded more than one identification   | -0.07 | AAGACACAATACGGACACTAA  | XM_113696:    | NM_021931:NM_144973:<br>NM_001364:NM_003414:NM_012095:NM_199051:<br>NM_207012:<br>NM_001004441:NM_002843:NM_003922:NM_030799:NM_198682:                                                                                                                                                                                                                                                                                                                                                                                                   |
| 1740;1030E Multiple(DLG: Annotation yielded more than one identification   | -1.45 | CAGGACAGTTAAATGCCAAA   | XM_031744:    | XM_031744:                                                                                                                                                                                                                                                                                                                                                                                                                                                                                                                                |
| 340120;57E Multiple(DPF: Annotation yielded more than one identification   | 0.05  | CAGAGTTGATGAAAGCCTAA   | XM_290552:    | XM_290552:                                                                                                                                                                                                                                                                                                                                                                                                                                                                                                                                |
| 1809;7273; Multiple(DPY: Annotation yielded more than one identification   | -0.62 | AAGGAAGAAACGAATCCAA    | NM_032032:    | NM_001387:NM_003319:NM_004480:NM_005665:<br>NM_005909:NM_006573:NM_016427:NM_022771:<br>NM_032010:NM_052900:NM_133378:NM_133432:<br>NM_133437:NM_152319:NM_178154:NM_178155:<br>NM_178156:NM_198123:NM_198124:NM_206853:<br>NM_206854:NM_206855:XM_087386:                                                                                                                                                                                                                                                                                |
| 1915;4405E Multiple(EEF1: Annotation yielded more than one identification  | 0.01  | AAGCTGGAAGATGGCCCTAAA  | NM_001402:    | XM_496374:NM_001402:NM_496711:XM_496717:                                                                                                                                                                                                                                                                                                                                                                                                                                                                                                  |
| 1915;4410E Multiple(EEF1: Annotation yielded more than one identification  | -1.60 | CTGTGTAATGATAACAATGCA  | NM_001402:    | NM_001402:NM_496711:                                                                                                                                                                                                                                                                                                                                                                                                                                                                                                                      |
| 8665;3397E Multiple(EIF3: Annotation yielded more than one identification  | -3.21 | CGGCATGAGCATCAAAGCCTA  | NM_003754:    | XM_290345:NM_003754:                                                                                                                                                                                                                                                                                                                                                                                                                                                                                                                      |
| 8665;3397E Multiple(EIF3: Annotation yielded more than one identification  | 1.43  | CGGCATGAGCATCAAAGCCTA  | XM_290345:    | XM_290345:NM_003754:                                                                                                                                                                                                                                                                                                                                                                                                                                                                                                                      |
| 10136;2343E Multiple(ELA: Annotation yielded more than one identification  | 1.40  | AAGAATAAAGATCTCTCGGAA  | NM_005747:    | NM_005747:NM_007352:                                                                                                                                                                                                                                                                                                                                                                                                                                                                                                                      |
| 10136;2343E Multiple(ELA: Annotation yielded more than one identification  | -0.65 | CACATCTGAAATAAGAATAA   | NM_007352:    | NM_005747:NM_007352:                                                                                                                                                                                                                                                                                                                                                                                                                                                                                                                      |
| 2048;16741 Multiple(EPH: Annotation yielded more than one identification   | -1.17 | CACCATCAAAAGCTCTATGTAA | XM_035946:    | NM_004442:NM_017449:NM_153234:XM_376787:                                                                                                                                                                                                                                                                                                                                                                                                                                                                                                  |
| 115548;15C Multiple(FCH: Annotation yielded more than one identification   | -1.54 | CACAATTGATCCAAACACAAA  | NM_173354:    | NM_138782:NM_173354:                                                                                                                                                                                                                                                                                                                                                                                                                                                                                                                      |
| 2224;4412E Multiple(FDP: Annotation yielded more than one identification   | 0.03  | CAAGGAGTCTCGGATACAAA   | NM_002004:    | XM_496902:NM_499334:NM_002004:XM_497102:                                                                                                                                                                                                                                                                                                                                                                                                                                                                                                  |
| 2224;4412E Multiple(FDP: Annotation yielded more than one identification   | -0.21 | CTGGAGTACAATGCCATTGGA  | NM_002004:    | XM_496902:NM_499334:NM_002004:XM_497102:                                                                                                                                                                                                                                                                                                                                                                                                                                                                                                  |
| 2865;2866 Multiple(FFAF: Annotation yielded more than one identification   | -0.49 | CAGCGTGTCTACGTCATAGA   | NM_005305:    | NM_005304:NM_005305:                                                                                                                                                                                                                                                                                                                                                                                                                                                                                                                      |
| 2865;2866 Multiple(FFAF: Annotation yielded more than one identification   | 1.10  | CCCCTGATCATCACCAGCTA   | NM_005305:    | NM_005304:NM_005305:<br>NM_001008401:NM_003786:NM_004490:NM_014208:NM_020037:NM_020038:<br>NM_001004301:NM_001009569:NM_002489:NM_04641:NM_015349:<br>NM_001033659:NM_005874:<br>NM_173527:XM_371590:<br>NM_001001685:NM_016505:NM_173602:<br>NM_001001707:NM_001847:NM_002392:NM_002897:NM_016836:NM_016839:NM_018717:NM_033641:<br>NM_000402:NM_001701:NM_004758:NM_024630:<br>NM_153746:XM_498553:<br>NM_000152:NM_001004430:NM_001004713:NM_01037343:NM_001424:NM_003159:NM_007121:NM_018328:NM_024767:NM_182643:XM_044062:XM_498088: |
| 388561;871 Multiple(FLJ1: Annotation yielded more than one identification  | 0.39  | CAGGTAGTAGACAGAACAATA  | NM_004522:    | XM_496902:NM_499334:NM_002004:XM_497102:                                                                                                                                                                                                                                                                                                                                                                                                                                                                                                  |
| 126017;802 Multiple(FLJ1: Annotation yielded more than one identification  | -0.83 | ATGTCTAATTGGAGATTTCAA  | NM_025052:    | XM_496902:NM_499334:NM_002004:XM_497102:                                                                                                                                                                                                                                                                                                                                                                                                                                                                                                  |
| 284071;102 Multiple(FLJ3: Annotation yielded more than one identification  | 2.18  | AAAGATGCTAACGCTAGCATA  | NM_001005241: | XM_496902:NM_499334:NM_002004:XM_497102:                                                                                                                                                                                                                                                                                                                                                                                                                                                                                                  |
| 161253;57E Multiple(FLJ3: Annotation yielded more than one identification  | -0.18 | TAAGATAGTCTGAAAGGTAA   | XM_091156:    | XM_290345:NM_003754:                                                                                                                                                                                                                                                                                                                                                                                                                                                                                                                      |
| 400624;51E Multiple(FLJ4: Annotation yielded more than one identification  | -1.27 | CCGCTTGGGCTCTCTATGAA   | NM_016478:    | XM_290345:NM_003754:<br>NM_005747:NM_007352:                                                                                                                                                                                                                                                                                                                                                                                                                                                                                              |
| 401337;12E Multiple(FLJ4: Annotation yielded more than one identification  | -1.36 | TAGGGCTTCTGAAAGATTTAA  | XM_085722:    | XM_290345:NM_003754:<br>NM_005747:NM_007352:                                                                                                                                                                                                                                                                                                                                                                                                                                                                                              |
| 2539;570;9; Multiple(G6PI: Annotation yielded more than one identification | -3.89 | CACCTGGGTGTCACACGGCAA  | NM_024980:    | XM_290345:NM_003754:<br>NM_005747:NM_007352:                                                                                                                                                                                                                                                                                                                                                                                                                                                                                              |
| 2548;1404E Multiple(GAA: Annotation yielded more than one identification   | 0.80  | CACCATGTTCTCTCCATACA   | XR_000213:    | XM_290345:NM_003754:<br>NM_005747:NM_007352:                                                                                                                                                                                                                                                                                                                                                                                                                                                                                              |
| 2562;7936E Multiple(GABI: Annotation yielded more than one identification  | 0.11  | TAGATTGAATTAACCTCTCTA  | XM_062645:    | XM_290345:NM_003754:<br>NM_005747:NM_007352:                                                                                                                                                                                                                                                                                                                                                                                                                                                                                              |
| 145781;814 Multiple(Gcon: Annotation yielded more than one identification  | 0.17  | ATATTTGAATATTGTTTAA    | NM_015532:    | XM_290345:NM_003754:<br>NM_005747:NM_007352:                                                                                                                                                                                                                                                                                                                                                                                                                                                                                              |

|                                                                            |        |                        |               |                                                                                                                                                                                                                                    |
|----------------------------------------------------------------------------|--------|------------------------|---------------|------------------------------------------------------------------------------------------------------------------------------------------------------------------------------------------------------------------------------------|
| 145781:814 Multiple(Gcon Annotation yielded more than one identification)  | -0.45  | CGGGACTTAATTAATACAA    | NM_015532:    | NM_001018094:NM_001018097:NM_001018092:NM_001018093:NM_001018090:NM_001018091:NM_001018098:NM_015532:NM_001018102:                                                                                                                 |
| 2657:10715 Multiple(GDF Annotation yielded more than one identification)   | -0.50  | CAAGCTCAACATTTACTCAA   | NM_001492:    | NM_001492:NM_198207:NM_021267:                                                                                                                                                                                                     |
| 2657:10715 Multiple(GDF Annotation yielded more than one identification)   | 0.80   | CTCCATCTACGCTAGCTATA   | NM_001492:    | NM_001492:NM_198207:NM_021267:                                                                                                                                                                                                     |
| 26088:1756 Multiple(GGA Annotation yielded more than one identification)   | 0.77   | CAAAACAATAGAGCCACTAA   | NM_172100:    | NM_001001560:NM_001001561:NM_004019:NM_004578:NM_006542:NM_013365:NM_145007:NM_203349:                                                                                                                                             |
| 2688:1442: Multiple(GH1: Annotation yielded more than one identification)  | -1.01  | AAAGCAGACCTACAGCAAGTT  | NM_000515:    | NM_000515:NM_001317:NM_001318:NM_020991:                                                                                                                                                                                           |
| 2790:55288 Multiple(GNG Annotation yielded more than one identification)   | 1.00   | CAGAACAATGTAATGATTA    | NM_004125:    | NM_022559:NM_022560:NM_022561:NM_022562:NM_022579:NM_022580:NM_022581:NM_022640:NM_022641:NM_022644:NM_022645:NM_001017998:NM_004125:                                                                                              |
| 9950:757:5 Multiple(GOLI Annotation yielded more than one identification)  | 0.14   | CAGCATGTTAATGAATAGAAT  | XM_370661:    | NM_005113:NM_006134:NM_017519:NM_020732:NM_024860:NM_138959:NM_144890:NM_153681:                                                                                                                                                   |
| 8843:33844 Multiple(GPR Annotation yielded more than one identification)   | -0.08  | CCCAGAAGGACTGAGCTAAA   | XM_006018:    | NM_153682:NM_175863:NM_198539:NM_497010:NM_006018:NM_177551:                                                                                                                                                                       |
| 8843:33844 Multiple(GPR Annotation yielded more than one identification)   | -0.01  | CTGCTTCAACACCGGACTAA   | XM_006018:    | NM_006018:NM_177551:                                                                                                                                                                                                               |
| 124274:161 Multiple(GPR Annotation yielded more than one identification)   | 0.20   | CAGTAACITCTCTCTTAACAA  | XM_059051:    | NM_001002911:NM_001351:                                                                                                                                                                                                            |
| 113457:112 Multiple(H2-A Annotation yielded more than one identification)  | -0.57  | CAAGCTAGAGTTTGCCATTTA  | XM_207312:    | NM_207312:NM_080386:                                                                                                                                                                                                               |
| 392360:151 Multiple(HCT: Annotation yielded more than one identification)  | -3.49  | CAGCTTCAACATGGCCATGAA  | XM_497242:    | NM_145918:NM_001023564:NM_001912:XM_497240:XM_497242:XM_497226:XM_497229:XM_497223:XM_497231:                                                                                                                                      |
| 8925:54474 Multiple(HER: Annotation yielded more than one identification)  | 0.74   | AAGGATAGCATCAACTGGCAA  | XM_006028:    | NM_003922:NM_019010:XM_378798:                                                                                                                                                                                                     |
| 8340:8345: Multiple(HIST Annotation yielded more than one identification)  | -0.61  | CACCAAGTACACCAGCTCCAA  | NM_003527:    | NM_175055:NM_005692:NM_003525:NM_003527:NM_003519:NM_003524:NM_003526:NM_003528:                                                                                                                                                   |
| 3292:9187: Multiple(HSD: Annotation yielded more than one identification)  | -0.38  | CGGCACATCCACCTCTCTA    | XM_061677:    | NM_000413:NM_004727:NM_007157:NM_021306:NM_033375:NM_080625:XM_047357:XM_498958:                                                                                                                                                   |
| 3446:3451 Multiple(IFNA Annotation yielded more than one identification)   | 0.18   | CTGGTTCAACATGGCAATGAT  | XM_002171:    | NM_002171:NM_021268:                                                                                                                                                                                                               |
| 3446:3444: Multiple(IFNA Annotation yielded more than one identification)  | -3.88  | CAGCAACTGAATGACCTGGAA  | XM_002171:    | NM_002171:NM_021068:NM_021057:                                                                                                                                                                                                     |
| 3447:3439 Multiple(IFNA Annotation yielded more than one identification)   | 0.40   | ATCCCTCTCTTTTCAACAAA   | XM_006900:    | NM_006900:NM_024013:                                                                                                                                                                                                               |
| 3448:3449: Multiple(IFNA Annotation yielded more than one identification)  | 2.24   | ATCTATTATTAAATATTTA    | XM_002173:    | NM_002173:NM_021068:NM_021268:NM_002172:                                                                                                                                                                                           |
| 3448:3449: Multiple(IFNA Annotation yielded more than one identification)  | 2.24   | ATCTATTATTAAATATTTA    | XM_002173:    | NM_002173:NM_021068:NM_021268:NM_002172:                                                                                                                                                                                           |
| 3448:3444 Multiple(IFNA Annotation yielded more than one identification)   | -3.38  | CTGGTTCATCATGGAATGAT   | XM_021057:    | NM_021057:NM_002172:                                                                                                                                                                                                               |
| 3475:9097: Multiple(IFRD Annotation yielded more than one identification)  | 0.26   | ATACGGGTATCCAACAGAAA   | XM_373156:    | NM_001007245:NM_001037334:NM_001550:NM_005151:NM_018569:                                                                                                                                                                           |
| 55081:5767 Multiple(IFT5: Annotation yielded more than one identification) | -3.48  | AAGAATTGCTGTCACCTCAA   | XM_064062.4:  | NM_018010:NM_020919:NM_024590:NM_025150:NM_153688:                                                                                                                                                                                 |
| 282616:282 Multiple(IL28: Annotation yielded more than one identification) | -0.47  | CAGGCCTTTAAGAGGCCAAA   | XM_172139:    | NM_172139:NM_172138:                                                                                                                                                                                                               |
| 282616:282 Multiple(IL28: Annotation yielded more than one identification) | -4.18  | CTGCCACATAGCCAGTTCAA   | XM_172139:    | NM_172139:NM_172138:                                                                                                                                                                                                               |
| 3759:7273: Multiple(KCN: Annotation yielded more than one identification)  | -0.60  | CTGGAAGTCAGCTGACATTA   | XM_290793:    | NM_000891:NM_003319:NM_005336:NM_006197:NM_021013:NM_133378:NM_133432:NM_133437:NM_152433:NM_198439:NM_203346:NM_014967:NM_019083:NM_198990:NM_205543:XM_379030:XM_498569:XM_498572:                                               |
| 22909:5448 Multiple(KIAA Annotation yielded more than one identification)  | 0.39   | TAAGTGGTTAAGAGATCAA    | XM_001005241: | NM_017641:NM_152553:                                                                                                                                                                                                               |
| 55605:1542 Multiple(KIF2 Annotation yielded more than one identification)  | -0.77  | CTCAGTGATTTGGATGAAA    | XM_174980:    | NM_000223:NM_003778:NM_212543:                                                                                                                                                                                                     |
| 3859:8702 Multiple(KRT1 Annotation yielded more than one identification)   | 0.68   | ATGGATCTCTCAACAACCTA   | XM_145185:    | NM_002273:NM_006121:                                                                                                                                                                                                               |
| 3856:3848 Multiple(KRT: Annotation yielded more than one identification)   | 0.02   | CAGCATCATTTGCTGAGGTCAA | XM_002273:    | XM_374920:NM_062300:                                                                                                                                                                                                               |
| 120824:398 Multiple(LOC: Annotation yielded more than one identification)  | -5.57  | CGGGCCCTGTTCTACCTCAA   | XM_374920:    | NM_001013619:NM_002060:NM_002184:NM_004093:NM_006421:NM_015225:NM_016166:NM_016350:NM_017617:NM_017969:NM_018034:NM_020921:NM_030621:NM_152334:NM_175767:NM_177438:NM_182944:NM_182945:NM_182946:NM_199459:NM_016371:NM_001031744: |
| 123688:270 Multiple(LOC: Annotation yielded more than one identification)  | -0.15  | TTGCATCTGATCAATGAGGAA  | XM_004140:    | NM_001001436:NM_001008493:NM_001031804:NM_002015:NM_002544:NM_015055:NM_018212:NM_020856:NM_025106:NM_032145:NM_032730:NM_144664:XM_378751:                                                                                        |
| 158160:514 Multiple(LOC: Annotation yielded more than one identification)  | 1.62   | TTGATAATATGATTTGTAA    | XM_016371:    | XM_498132:NM_002295:XM_370697:NM_001012321:XM_372048:XM_497061:XM_376888:NM_001005472:                                                                                                                                             |
| 388272:557 Multiple(LOC: Annotation yielded more than one identification)  | 0.42   | CTGTAAGTAATTTGCTCTAAA  | XM_005377:    | XM_498132:NM_002295:XM_370697:NM_001012321:XM_372048:XM_497061:XM_376888:NM_001005472:                                                                                                                                             |
| 388524:392 Multiple(LOC: Annotation yielded more than one identification)  | 0.21   | CACGGAGGCATCTTATGTTAA  | XM_001005472: | XM_371273:NM_002295:NM_001012321:XM_372048:NM_001005472:                                                                                                                                                                           |
| 388524:392 Multiple(LOC: Annotation yielded more than one identification)  | -0.74  | CACGGAGGCATCTTATGTTAA  | XM_376888:    | XM_374917:XM_374920:                                                                                                                                                                                                               |
| 388524:392 Multiple(LOC: Annotation yielded more than one identification)  | -0.04  | CCCGTCGTAACCTAAAGGGAA  | XM_001005472: | XM_374917:XM_374920:                                                                                                                                                                                                               |
| 399937:398 Multiple(LOC: Annotation yielded more than one identification)  | 0.57   | CAGCAACTAATGAAAGCCAA   | XM_374917:    | XM_374917:XM_374920:                                                                                                                                                                                                               |
| 399937:398 Multiple(LOC: Annotation yielded more than one identification)  | 0.24   | CAGCAACTAATGAAAGCCAA   | XM_374920:    | NM_001034843:NM_199261:NM_130785:NM_013315:NM_199259:NM_199260:NR_001591:XM_495953:XR_000202:NM_199254:                                                                                                                            |
| 400927:717 Multiple(LOC: Annotation yielded more than one identification)  | 0.10   | ATGGATGTTCTCTTCGAGTA   | XM_376010:    | NM_001013689:NM_001018158:                                                                                                                                                                                                         |
| 401622:401 Multiple(LOC: Annotation yielded more than one identification)  | -0.49  | CTCCAGGTAAGAAACTGAA    | XM_025052:    | XM_379995:XM_377933:                                                                                                                                                                                                               |
| 402251:402 Multiple(LOC: Annotation yielded more than one identification)  | -1.53  | CAGAAGAAGTCTTGTCATCAA  | XM_379995:    | NM_001953:NM_001014440:                                                                                                                                                                                                            |
| 440836:188 Multiple(LOC: Annotation yielded more than one identification)  | -3.32  | CGCTGTGCGCGAACCTGAA    | XM_001953:    | NR_002473:NR_002453:                                                                                                                                                                                                               |
| 595101:440 Multiple(LOC: Annotation yielded more than one identification)  | -0.02  | CTGAAGATTGGTCACTGAAA   | XM_031211:    | XM_378044:XM_114611:                                                                                                                                                                                                               |
| 642859:642 Multiple(LOC: Annotation yielded more than one identification)  | -0.88  | GAGGACACCTATTCGGAAGAA  | XM_114611:    | XM_378044:XM_114611:                                                                                                                                                                                                               |
| 642859:642 Multiple(LOC: Annotation yielded more than one identification)  | 0.34   | CGTGTTCCTGGTGGAGTATGT  | XM_114611:    | XM_376720:XM_379967:                                                                                                                                                                                                               |
| 643641:231 Multiple(LOC: Annotation yielded more than one identification)  | 0.14   | CCCGATCTCTCCACCTAA     | XM_376720:    | XM_376720:XM_379967:                                                                                                                                                                                                               |
| 643641:231 Multiple(LOC: Annotation yielded more than one identification)  | -1.02  | AAGGTTATACAGGACCAATCA  | XM_376720:    | NM_005577:NM_024492:NM_145727:                                                                                                                                                                                                     |
| 4018:80350 Multiple(LPA: Annotation yielded more than one identification)  | -1.04  | AACAGGAAGGACATGTCAATC  | XM_005577:    | NM_004525:NM_005570:NM_007011:NM_012098:NM_014369:NM_018995:NM_152924:NM_153045:NM_208682:                                                                                                                                         |
| 4036:3998: Multiple(LRP: Annotation yielded more than one identification)  | 1.07   | TCCAGGTGATCTGAACCTGAA  | XM_376010:    | NM_001017405:NM_005882:NM_016227:                                                                                                                                                                                                  |
| 10296:5143 Multiple(MAE: Annotation yielded more than one identification)  | -9.99  | AAGACCCGAAAGGCAACTTAA  | XM_001204:    | NR_002144:NM_030662:                                                                                                                                                                                                               |
| 5605:40782 Multiple(MAP: Annotation yielded more than one identification)  | -0.60  | TCCAGGAGTATGCAATAAA    | NR_002144:    | XM_496404:NM_181704:NM_182481:NM_182482:NM_170606:NM_182484:NM_021230:                                                                                                                                                             |
| 58508:8531 Multiple(MLL: Annotation yielded more than one identification)  | 0.68   | CTGCAGATATTTCTCAATA    | XM_181704:    | NM_001009569:NM_004641:NM_005941:NM_015317:NM_017672:NM_152551:                                                                                                                                                                    |
| 8028:4325: Multiple(MLL: Annotation yielded more than one identification)  | -42.70 | TTGGTCTGTGAATATTATAA   | BC028192:     | NM_006983:NM_004659:                                                                                                                                                                                                               |
| 8511:8510 Multiple(MMP Annotation yielded more than one identification)    | -0.56  | CAGAAGATCTCCACAAGTAAA  | XM_004659:    | NM_006983:NM_004659:                                                                                                                                                                                                               |
| 8511:8510 Multiple(MMP Annotation yielded more than one identification)    | 0.06   | COGGCGCTCATGCACCTGAA   | XM_004659:    | NM_006983:NM_004659:                                                                                                                                                                                                               |
| 4328:64386 Multiple(MMP Annotation yielded more than one identification)   | -6.91  | CTCCATTATGAGGCCCTTCTA  | XM_004142:    | NM_004142:NM_022718:NM_022468:                                                                                                                                                                                                     |

|                                                                           |       |                        |               |                                                                                                      |
|---------------------------------------------------------------------------|-------|------------------------|---------------|------------------------------------------------------------------------------------------------------|
| 414308:436 Multiple(MRC Annotation yielded more than one identification   | -2.16 | CTCCAATTTATGAACTTTA    | NM_002438:    | NM_001009567:NM_002438:                                                                              |
| 414308:436 Multiple(MRC Annotation yielded more than one identification   | 2.39  | ATGGAAATATGTAACACAGAAA | NM_002438:    | NM_001009567:NM_002438:                                                                              |
| 503497:140 Multiple(MS4) Annotation yielded more than one identification  | -0.28 | TCCATCGATCGGAATTTATA   | BC028192:     | NM_001012417:NM_020828:NM_205850:                                                                    |
| 2206:1282: Multiple(MS4) Annotation yielded more than one identification  | 0.12  | AAGATTAGGTAACTTCTCA    | AK023420:     | NM_000139:NM_001845:NM_002222:NM_032557:XM_042698:                                                   |
| 57876:6421 Multiple(MUC Annotation yielded more than one identification   | 0.68  | CCCAGTATATCAGTACCTTTA  | XM_168578:    | XM_374501:NM_168578:                                                                                 |
| 9172:15731 Multiple(MYO Annotation yielded more than one identification   | -3.61 | ATGCGGAATTAATCTCCTCAA  | XM_062645:    | NM_003970:NM_152562:                                                                                 |
| 4666:34253 Multiple(NAC) Annotation yielded more than one identification  | -0.52 | CAGCTTGGTTGAAATTTGTA   | NM_005594:    | NM_005594:XM_371715:NM_199290:                                                                       |
| 8440:1775: Multiple(NCK) Annotation yielded more than one identification  | -6.04 | CAGCGCGGTGTCGCCCTCAA   | XM_059051:    | NM_001004720:NM_001374:NM_003581:NM_003920:                                                          |
| 4745:55187 Multiple(NELL Annotation yielded more than one identification  | -6.07 | CTGGATAATATCACCTATAGA  | NM_001462:    | NM_006157:NM_015378:NM_018156:XM_496703:                                                             |
| 654364:482 Multiple(NME Annotation yielded more than one identification   | -0.59 | ATAGAGCATATTTGCCAATAA  | NM_002512:    | NM_001018136:NM_002512:NM_001018137:NM_001018138:NM_001018139:                                       |
| 654364:482 Multiple(NME Annotation yielded more than one identification   | 0.74  | TAGAGCATATTTGCCAATAA   | NM_002512:    | NM_001018136:NM_002512:NM_001018137:NM_001018138:NM_001018139:                                       |
| 654364:482 Multiple(NME Annotation yielded more than one identification   | -1.59 | TGGGCTGGTGAAGTACATGAA  | NR_001577:    | NR_001577:NM_001018136:NM_002512:NM_001018137:NM_001018138:NM_001018139:                             |
| 654364:482 Multiple(NME Annotation yielded more than one identification   | 0.15  | CAGTTGGCAGGAACATCATT   | NR_001577:    | NR_001577:NM_001018136:NM_002512:NM_001018137:NM_001018138:NM_001018139:                             |
| 4893:10717 Multiple(NRA) Annotation yielded more than one identification  | 0.61  | CCAGCTTCATGATAGTTTA    | NM_201546:    | NM_002524:NM_006594:NM_018482:                                                                       |
| 11163:4406 Multiple(NUD) Annotation yielded more than one identification  | 1.20  | AACATTTGTTCTACAAATTTAA | NM_019094:    | NM_019094:NR_002212:NM_199040:                                                                       |
| 11163:4406 Multiple(NUD) Annotation yielded more than one identification  | -0.41 | CAGGACTATTTGTCACATAA   | NM_019094:    | NM_019094:NR_002212:NM_199040:                                                                       |
| 9480:39087 Multiple(ONE) Annotation yielded more than one identification  | -3.72 | CGCCATCTTCAAGGAGAACAA  | XM_372702:    | XM_372702:NM_004852:                                                                                 |
| 2652:5956 Multiple(OPN) Annotation yielded more than one identification   | 0.34  | CAGCATCTTCACTACACCAA   | NM_020061:    | NM_020061:NM_000513:                                                                                 |
| 341276:144 Multiple(OR1) Annotation yielded more than one identification  | -0.12 | CTGGAAATTTGGCTTCAACCTA | NM_001004460: | NM_001004460:NM_00178168:                                                                            |
| 8385:8386 Multiple(OR1) Annotation yielded more than one identification   | -5.91 | AGGTTCTATGACCACATCCTA  | NM_003552:    | NM_003552:NM_014566:                                                                                 |
| 8385:8386 Multiple(OR1) Annotation yielded more than one identification   | 1.13  | CTGGCCTTAAGAAATACAA    | NM_003552:    | NM_003552:NM_014566:                                                                                 |
| 138881:343 Multiple(OR1) Annotation yielded more than one identification  | -0.67 | CCCAAGATGCTTATCAACTTA  | NM_001004472: | NM_001004454:NM_001004472:NM_001005479:NM_001010908:NM_012368:NM_148170:NR_001564:                   |
| 401427:795 Multiple(OR2) Annotation yielded more than one identification  | -2.59 | AAGAGAGTGTGGGAGTAGAA   | NM_030908:    | NM_001005328:NM_030908:                                                                              |
| 401427:795 Multiple(OR2) Annotation yielded more than one identification  | 0.27  | TGGGAGTAGAAAGGCTTTTA   | NM_030908:    | NM_001005328:NM_030908:                                                                              |
| 391192:262 Multiple(OR2) Annotation yielded more than one identification  | -1.81 | ATGGCTCTAATGGAACACTA   | NM_001004687: | NR_002145:NM_001004687:                                                                              |
| 403239:107 Multiple(OR2) Annotation yielded more than one identification  | -0.98 | TGGGCTTTCTTTGCCCTCAT   | NM_175617:    | NM_001001824:NM_016272:NM_021648:                                                                    |
| 219417:504 Multiple(OR8) Annotation yielded more than one identification  | 0.46  | TAGCACTTCTTATAGCTATA   | NM_001005204: | NM_001005204:NM_001013356:                                                                           |
| 219417:504 Multiple(OR8) Annotation yielded more than one identification  | 0.23  | TGGGAATTTCTGTACAACAA   | NM_001005204: | NM_001005204:NM_001013356:                                                                           |
| 5004:5005 Multiple(CRM) Annotation yielded more than one identification   | 1.48  | CACGATCTTCTCAGAGAGTA   | NM_000607:    | NM_000608:NM_000607:                                                                                 |
| 5004:5005 Multiple(CRM) Annotation yielded more than one identification   | -4.36 | CAGCAGGAGAAGGAGGAGAA   | NM_000607:    | NM_000608:NM_000607:                                                                                 |
| 5122:8707: Multiple(PCSI) Annotation yielded more than one identification | -0.04 | AACCTGGATATCATATTATA   | NM_001010844: | NM_000439:NM_003783:NM_133646:XM_498441:XM_499121:XM_499571:                                         |
| 5139:23650 Multiple(PDE) Annotation yielded more than one identification  | -0.41 | CTGCAGAAATTTAGTAACATT  | BX640919:     | NM_000921:NM_012101:NM_020648:NM_032119:                                                             |
| 5343:5342: Multiple(PLG) Annotation yielded more than one identification  | 1.05  | ATGAAGATACGTGAAATTCAA  | XM_376111:    | NM_058193:NM_152303:NM_152488:NM_208333:                                                             |
| 5343:5342: Multiple(PLG) Annotation yielded more than one identification  | -0.43 | CAGAGAAGAAATGTGACAGAAA | XM_376111:    | NM_002665:NM_001032392:XM_376111:                                                                    |
| 5380:5383 Multiple(PMS) Annotation yielded more than one identification   | 1.22  | ATGGATCTCAATGAAGTTTCA  | NM_174930:    | NM_002665:NM_001032392:XM_376111:                                                                    |
| 5380:5383: Multiple(PMS) Annotation yielded more than one identification  | 0.66  | CAAAGGAATATTAAGAAGAAA  | NM_174930:    | NM_174930:XM_496900:XM_496904:XM_379874:XM_499331:XM_499336:NM_002679:                               |
| 5542:44008 Multiple(PRB) Annotation yielded more than one identification  | -0.93 | CAAGAAGGCAACAATCCTCAA  | NM_199354:    | NM_174930:XM_496900:XM_379874:XM_499331:XM_380025:XM_377962:NM_002679:                               |
| 5542:5555 Multiple(PRB) Annotation yielded more than one identification   | 0.10  | TAACTTCAATATACCAATAAA  | NM_199354:    | NM_005039:NM_199353:NM_199354:NM_006248:                                                             |
| 5545:5554 Multiple(PRB) Annotation yielded more than one identification   | 0.25  | CAGGAAGTGAATAAGAAGATA  | NM_006250:    | NM_005039:NM_199353:NM_199354:NM_005042:                                                             |
| 5644:5645 Multiple(PRS) Annotation yielded more than one identification   | -0.01 | CTGGGAGAGCACAAATCGAA   | NM_002770:    | NM_002723:NM_006250:                                                                                 |
| 5651:6847: Multiple(PRS) Annotation yielded more than one identification  | 3.32  | TACAGGTAATAGATGATTTA   | XM_372798:    | NM_002769:NM_002770:                                                                                 |
| 5757:44145 Multiple(PTM) Annotation yielded more than one identification  | -1.45 | TTGTCCAACAATAAACAGGAA  | NM_002823:    | NM_002772:NM_003176:NM_016255:NM_198520:                                                             |
| 5781:8932: Multiple(PTP) Annotation yielded more than one identification  | 0.26  | TGGATAGTCTATAGAATTTA   | NM_032143:    | NM_002823:XM_499153:NM_499154:                                                                       |
| 353091:803 Multiple(RAE) Annotation yielded more than one identification  | -1.59 | GTGGACATACTTACAGAGCAA  | NM_130900:    | NM_002834:NM_003927:NM_004438:NM_006777:                                                             |
| 5896:10313 Multiple(RAG) Annotation yielded more than one identification  | 0.62  | CACTTGACGTAAAGAGGAAA   | XM_085722:    | NM_006901:NM_013396:NM_016649:NM_018561:                                                             |
| 5906:5572 Multiple(RAP) Annotation yielded more than one identification   | -0.08 | CAGAAGATGCTCAGATTTTAA  | NM_002884:    | NM_130900:NM_001001788:NM_025217:                                                                    |
| 5932:1795: Multiple(RBB) Annotation yielded more than one identification  | 0.02  | AAGGGCTCTTTGATAAGAAA   | NM_024980:    | NM_000448:NM_006054:NM_018559:NM_153332:                                                             |
| 8608:2042: Multiple(RDH) Annotation yielded more than one identification  | 2.00  | CAGAATCTGCGAGGTGCGAA   | XR_000198:    | NM_201428:NM_201429:NM_201430:                                                                       |
| 440872:842 Multiple(RGP) Annotation yielded more than one identification  | -2.71 | CAGAATTATGATAATAAGCAA  | NM_005054:    | NM_001010935:NM_018128:                                                                              |
| 440872:842 Multiple(RGP) Annotation yielded more than one identification  | 1.57  | CAGCATGGTAATAATGTTCAA  | NM_005054:    | NM_002894:NM_004947:NM_005845:NM_007120:                                                             |
| 139886:158 Multiple(RP1) Annotation yielded more than one identification  | 0.70  | CTGAATGGTATCTTATATCAA  | NM_006088:    | NM_016218:NM_016237:NM_198141:NM_203291:NM_203292:                                                   |
| 6120:10349 Multiple(RPE) Annotation yielded more than one identification  | 0.87  | ACCATTCTTTAACAACGTAAA  | NM_022122:    | NM_003708:NM_005233:NM_005422:NM_014281:                                                             |
| 6103:94025 Multiple(RPG) Annotation yielded more than one identification  | -2.94 | CAGCAGTATCGGCCCTTGTTGA | NM_017886:    | NM_021110:NM_025099:NM_078480:NM_182644:XM_051017:                                                   |
| 6134:28439 Multiple(RPL1) Annotation yielded more than one identification | -0.77 | CCCGTTGTTACCGGTATTGTA  | NM_209178:    | XM_496557:NM_001024457:XM_496581:NM_006267:NM_005054:                                                |
| 6134:28439 Multiple(RPL1) Annotation yielded more than one identification | 1.31  | CGGCACCAAGCTGCGAACAAA  | XM_209178:    | XM_496557:NM_001024457:XM_496581:NM_003260:NM_005054:                                                |
| 11224:4407 Multiple(RPL) Annotation yielded more than one identification  | -3.32 | TGCACCAATGGCCCAAGATCAA | XM_007209:    | NM_001012968:NM_001029857:NM_012388:NM_019006:NM_020918:NM_181723:NM_183239:                         |
| 25873:3472 Multiple(RPL) Annotation yielded more than one identification  | 1.31  | CGCCTCAAATTTTCAAGAAA   | NM_015414:    | NM_006916:NM_080282:NM_153207:NM_199229:                                                             |
| 6130:38847 Multiple(RPL) Annotation yielded more than one identification  | -3.53 | CAGGTGAACCTGGGAAGACAAA | NM_000972:    | NM_000328:NM_001023582:NM_001034853:NM_024690:                                                       |
| 6130:38847 Multiple(RPL) Annotation yielded more than one identification  | -4.82 | CACCACTTGGTGGAGAACAAA  | NM_000972:    | NM_006013:XM_209178:                                                                                 |
| 6233:38872 Multiple(RPS) Annotation yielded more than one identification  | -2.11 | CTGACTTACTGTTTCAACAAA  | NM_002954:    | XM_209500:XM_496264:XM_372471:NM_006013:XM_377511:XM_371781:XM_209178:                               |
| 6233:38872 Multiple(RPS) Annotation yielded more than one identification  | -5.30 | AAGTGGATGAGAAATGGCAAAA | XM_002954:    | XM_499313:NM_007209:XM_496890:XM_496446:                                                             |
| 6233:38872 Multiple(RPS) Annotation yielded more than one identification  | 1.24  | AAGTGGATGAGAAATGGCAAAA | XM_371330:    | NM_033643:NM_015414:XM_294581:                                                                       |
| 6233:38872 Multiple(RPS) Annotation yielded more than one identification  | 0.92  | AAGTGGATGAGAAATGGCAAAA | XM_371843:    | XM_371115:XM_497522:NM_000972:                                                                       |
| 6263:23607 Multiple(RYR) Annotation yielded more than one identification  | -1.90 | CAGCTTATTAAGATCCAGAA   | XM_113696:    | NM_497217:XM_371115:NM_000972:                                                                       |
| 6532:51552 Multiple(SLC) Annotation yielded more than one identification  | -5.11 | CTGGCAAGTGGAACAGCATAA  | NM_174980:    | NM_002954:XM_371330:XM_371843:                                                                       |
|                                                                           |       |                        |               | NM_002954:XM_371330:XM_371843:                                                                       |
|                                                                           |       |                        |               | NM_001036:NM_012120:NM_145063:NM_173081:XM_039676:XM_168055:XM_371586:XM_496206:XM_498422:XM_499550: |
|                                                                           |       |                        |               | NM_001045:NM_016322:XM_372532:                                                                       |

|            |                                                               |       |                        |               |                                                                                                                                                                                                                                                                                               |
|------------|---------------------------------------------------------------|-------|------------------------|---------------|-----------------------------------------------------------------------------------------------------------------------------------------------------------------------------------------------------------------------------------------------------------------------------------------------|
| 6542:23527 | Multiple(SLC7 Annotation yielded more than one identification | 0.97  | TGGGACCTACTTTATATATA   | XM_373038:    | NM_001008539:NM_003046:NM_012287:NM_013355:NM_017964:NM_021950:NM_138995:NM_152866:NM_181806:                                                                                                                                                                                                 |
| 6606:6607  | Multiple(SMN Annotation yielded more than one identification  | 1.02  | AAGGGTGTGTAGTTATATA    | NM_000344:    | NM_017411:NM_022874:NM_000344:NM_022876:NM_022877:NM_022875:                                                                                                                                                                                                                                  |
| 6606:6607  | Multiple(SMN Annotation yielded more than one identification  | 0.12  | TTGAATGATATTGGATAATTA  | NM_000344:    | NM_017411:NM_022874:NM_000344:NM_022876:NM_022877:NM_022875:                                                                                                                                                                                                                                  |
| 548313:675 | Multiple(SSX: Annotation yielded more than one identification | -3.12 | CCCGAAGATCATGCCCAAGAA  | NM_003147:    | NM_175698:NM_003147:NM_021014:NM_001034832:NM_174962:NM_005635:NM_173358:NM_174961:NM_005636:NM_175711:                                                                                                                                                                                       |
| 6767:15753 | Multiple(ST13 Annotation yielded more than one identification | -0.05 | CACCTGCTACTCAGAAAGCTA  | XM_496820:    | NM_499477:XM_497315:NR_002199:XM_496820:XM_498241:NM_003932:XM_165401:                                                                                                                                                                                                                        |
| 10617:5557 | Multiple(STA1 Annotation yielded more than one identification | 1.05  | AACGTTGATGAGGAATAAATT  | NM_153024:    | NM_006463:NM_017546:NM_017619:NM_018084:NM_020978:NM_021133:NM_025160:NM_181471:                                                                                                                                                                                                              |
| 7341:47433 | Multiple(SUM Annotation yielded more than one identification  | -2.22 | CAGGCTTGTGGTGATAAATAA  | NR_002190:    | NM_201647:NM_213622:XM_378238:                                                                                                                                                                                                                                                                |
| 7341:47433 | Multiple(SUM Annotation yielded more than one identification  | -3.83 | AAGGAAGGTGAATATATATAA  | NR_002190:    | NM_001005782:NM_003352:NR_002190:                                                                                                                                                                                                                                                             |
| 7027:44148 | Multiple(TFDF Annotation yielded more than one identification | -4.55 | CCGGATCTGGTAACATGGCAA  | NM_007111:    | NM_001005781:NM_003352:NR_002190:                                                                                                                                                                                                                                                             |
| 22797:9723 | Multiple(TFEC Annotation yielded more than one identification | -2.93 | AAGCAGCTGCTTATGGCATA   | XM_061677:    | XM_497098:NM_007111:                                                                                                                                                                                                                                                                          |
| 7039:8852: | Multiple(TGF: Annotation yielded more than one identification | -2.92 | CACAACCTGTTATTCTGCCCAA | NM_001004472: | NM_001018058:NM_012252:NM_012431:NM_023076:NM_033516:NM_207488:                                                                                                                                                                                                                               |
| 7048:4321: | Multiple(TGF: Annotation yielded more than one identification | 0.57  | CTCCAACGTGTCAGCCAAACA  | AB014541:     | NM_003236:NM_003886:NM_018018:NM_139289:                                                                                                                                                                                                                                                      |
| 9220:39968 | Multiple(TIAF Annotation yielded more than one identification | -1.53 | TACCCGATGATGGAATAATAA  | NM_004740:    | NM_00102847:NM_002426:NM_003242:NM_014874:NM_018121:NM_024032:XM_378623:                                                                                                                                                                                                                      |
| 7092:54801 | Multiple(TLL1 Annotation yielded more than one identification | 1.95  | CCACTAGAAAGTATTATAGTA  | NM_006088:    | NM_203318:NM_078471:NM_004740:                                                                                                                                                                                                                                                                |
| 7099:6658: | Multiple(TLR4 Annotation yielded more than one identification | -3.23 | CAGAAGGACTTGGCCTTGTA   | XM_371709:    | NM_012464:NM_017645:NM_025160:NM_080867:                                                                                                                                                                                                                                                      |
| 196527:464 | Multiple(TMEI Annotation yielded more than one identification | 0.88  | ACGGCTGAATCCAGCTGATA   | NM_001001957: | NM_173582:NM_199421:                                                                                                                                                                                                                                                                          |
| 8741:40797 | Multiple(TNFC Annotation yielded more than one identification | 0.35  | AGCGCAGGTGCTCCATTTA    | NM_003808:    | NM_003266:NM_005634:NM_006252:NM_014550:                                                                                                                                                                                                                                                      |
| 8741:40797 | Multiple(TNFC Annotation yielded more than one identification | -0.79 | CCGGCAAGGGCGAACTTAA    | NM_003808:    | NM_014737:NM_014874:NM_031407:NM_138375:                                                                                                                                                                                                                                                      |
| 7177:64498 | Multiple(TPS: Annotation yielded more than one identification | -1.06 | CTGGAACCTCATAAAGTGATC  | NM_003293:    | NM_138554:NM_138556:NM_138557:NM_170773:                                                                                                                                                                                                                                                      |
| 7177:23430 | Multiple(TPS: Annotation yielded more than one identification | -7.46 | CAGGATCATCGTGCACCACACA | NM_003293:    | NM_170774:                                                                                                                                                                                                                                                                                    |
| 4591:51542 | Multiple(TRIM Annotation yielded more than one identification | -1.54 | ACAGATCGTGTAGAAAGAGAAA | NM_001005191: | NM_001025356:NM_033375:                                                                                                                                                                                                                                                                       |
| 79097:3998 | Multiple(TRIM Annotation yielded more than one identification | -3.40 | TTGATTCTAATGTTATATAA   | XM_208061:    | NM_172087:NM_172088:NM_172089:NM_003808:                                                                                                                                                                                                                                                      |
| 79097:3998 | Multiple(TRIM Annotation yielded more than one identification | 0.82  | TTGATTCTAATGTTATATAA   | NM_024114:    | NM_172087:NM_172088:NM_172089:NM_003808:                                                                                                                                                                                                                                                      |
| 79097:4400 | Multiple(TRIM Annotation yielded more than one identification | 0.72  | AAGAATCAGAATGGCAATATA  | XM_495872:    | NM_003294:NM_024164:                                                                                                                                                                                                                                                                          |
| 79097:4400 | Multiple(TRIM Annotation yielded more than one identification | -2.50 | AAGAATCAGAATGGCAATATA  | XM_495873:    | NM_003294:NM_012217:NM_024164:                                                                                                                                                                                                                                                                |
| 79097:4400 | Multiple(TRIM Annotation yielded more than one identification | 0.49  | AAGAATCAGAATGGCAATATA  | NM_024114:    | NM_001005207:NM_001005739:NM_004734:NM_012433:NM_016516:NM_021163:NM_182631:XM_371254:                                                                                                                                                                                                        |
| 57093:2831 | Multiple(TRIM Annotation yielded more than one identification | 0.13  | CAGGCTTGTTCCTACCTCAA   | XM_208043:    | XM_208061:XM_374919:XM_495873:NM_024114:                                                                                                                                                                                                                                                      |
| 57093:2831 | Multiple(TRIM Annotation yielded more than one identification | -7.51 | CAGGCTTGTTCCTACCTCAA   | NM_020358:    | XM_208061:XM_374919:XM_495873:NM_024114:                                                                                                                                                                                                                                                      |
| 84767:1208 | Multiple(TRIM Annotation yielded more than one identification | -4.66 | CAGCAACTCAATGAAAGCAAA  | NM_032681:    | XM_495872:XM_495873:NM_024114:                                                                                                                                                                                                                                                                |
| 445372:538 | Multiple(TRIM Annotation yielded more than one identification | -2.80 | AAGACTGTACTCAACTATTTAA | NM_001003827: | XM_495872:XM_495873:NM_024114:                                                                                                                                                                                                                                                                |
| 445372:538 | Multiple(TRIM Annotation yielded more than one identification | -0.14 | CTGGGTGGATGTCACACTGAA  | NM_001003827: | XM_495872:XM_495873:NM_024114:                                                                                                                                                                                                                                                                |
| 136541:237 | Multiple(TRY1 Annotation yielded more than one identification | 0.30  | TAGGAATTAATATAAACTAA   | XM_035946:    | NM_020358:XM_208043:                                                                                                                                                                                                                                                                          |
| 55720:5767 | Multiple(TSR1 Annotation yielded more than one identification | 0.12  | GAGGCAAGGATGCTAGATTAA  | NM_019841:    | NM_032681:XM_495874:XM_062300:XM_208060:                                                                                                                                                                                                                                                      |
| 115669:767 | Multiple(TTCC Annotation yielded more than one identification | 1.22  | AAGGAAGATGTGGAATCTTTA  | NM_002192:    | NM_021616:NM_130389:NM_001003827:NM_00103819:                                                                                                                                                                                                                                                 |
| 56604:3476 | Multiple(TUB1 Annotation yielded more than one identification | -1.59 | CCAGCAGATGTTTGTAGCTAA  | XM_371207:    | NM_021616:NM_130389:NM_001003827:NM_00103819:                                                                                                                                                                                                                                                 |
| 56604:3476 | Multiple(TUB1 Annotation yielded more than one identification | -1.11 | CCAGCAGATGTTTGTAGCTAA  | NM_020040:    | NM_001001317:NM_013231:NM_018284:NM_145025:NM_207645:XM_370899:XM_375029:                                                                                                                                                                                                                     |
| 27338:4404 | Multiple(UBE: Annotation yielded more than one identification | -0.03 | TCCCTCCAACCTGTCTCTTAA  | NM_014501:    | NM_018128:NM_020918:NM_147189:                                                                                                                                                                                                                                                                |
| 7360:4247  | Multiple(UGP: Annotation yielded more than one identification | 0.41  | CCCAAAGTTAGTTACTCTTAA  | NM_006759:    | NM_001007795:NM_001008727:NM_003319:NM_05231:NM_006031:NM_006356:NM_006909:NM_012091:NM_015474:NM_017815:NM_018017:NM_018224:NM_020909:NM_024960:NM_025224:NM_031439:NM_032291:NM_133378:NM_133379:NM_133432:NM_133437:NM_138565:NM_139286:NM_153637:NM_153638:NM_153639:NM_153640:NM_153641: |
| 54658:5457 | Multiple(UGT: Annotation yielded more than one identification | -2.39 | ATGTTGCAATTGATCCTTTAA  | NM_000463:    | NM_173545:NM_194319:NM_198449:NM_207358:                                                                                                                                                                                                                                                      |
| 146862:160 | Multiple(UNC: Annotation yielded more than one identification | -1.79 | CTCCAGCAGCATCGACATCAA  | NM_014064:    | NM_020040:XM_371207:NM_177987:                                                                                                                                                                                                                                                                |
| 5976:9400: | Multiple(UPF: Annotation yielded more than one identification | -2.44 | TCCGCTGAGATCAGAAGGCCAA | AB014541:     | NM_014501:XM_496186:                                                                                                                                                                                                                                                                          |
| 11274:3738 | Multiple(USP: Annotation yielded more than one identification | 0.10  | AATCCAGTGTACTACGGAAA   | NM_017414:    | NM_001001521:NM_001015883:NM_002408:NM_006759:                                                                                                                                                                                                                                                |
| 11274:3738 | Multiple(USP: Annotation yielded more than one identification | -0.19 | AATGCCATTCTCCATCAGGAA  | NM_017414:    | NM_205862:NM_019077:NM_019076:NM_021027:                                                                                                                                                                                                                                                      |
| 9736:64062 | Multiple(USP: Annotation yielded more than one identification | -0.36 | ACCCAGTAACATAATATTTTCA | NM_152671:    | NM_019075:NM_019078:NM_019093:NM_007120:                                                                                                                                                                                                                                                      |
| 317703:916 | Multiple(VN1: Annotation yielded more than one identification | 1.32  | GTGCATGTTGGTAAACATCAT  | NM_173857:    | NM_000463:NM_001072:                                                                                                                                                                                                                                                                          |
| 6375:6846  | Multiple(XCL1 Annotation yielded more than one identification | -6.23 | CAGGAATCCCAACCCAGAAA   | NM_003175:    | NM_001033576:NM_014203:NM_130787:NM_173167:                                                                                                                                                                                                                                                   |
| 6375:6846  | Multiple(XCL1 Annotation yielded more than one identification | 2.01  | TATGTTCTAATTAATAAATTA  | NM_003175:    | NM_002911:NM_004259:NM_020383:NM_194286:XM_087089:                                                                                                                                                                                                                                            |
| 7531:44091 | Multiple(YWH Annotation yielded more than one identification  | 0.58  | AGGAGGTTAATCAGCACTATA  | NM_006761:    | NM_017414:XM_036729:                                                                                                                                                                                                                                                                          |
| 7531:44091 | Multiple(YWH Annotation yielded more than one identification  | 0.59  | CTGAAGCAGGTTAGCGTTGAA  | NM_006761:    | NM_017414:XM_036729:                                                                                                                                                                                                                                                                          |
| 9877:54852 | Multiple(ZC3: Annotation yielded more than one identification | -1.55 | CACGAGTAAATGAGGATGCAA  | XM_031744:    | NM_014709:NM_022118:XM_047550:XM_047554:                                                                                                                                                                                                                                                      |
| 64397:2348 | Multiple(ZFP1 Annotation yielded more than one identification | 1.10  | ACCCGGCAACATCAGTTTAAA  | NM_172100:    | NM_173857:XM_039908:                                                                                                                                                                                                                                                                          |
| 118813:265 | Multiple(ZFY: Annotation yielded more than one identification | -0.19 | CTGGCTCTTCCACCCATTTA   | NM_000456:    | NM_002995:NM_003175:                                                                                                                                                                                                                                                                          |
| 7637:83480 | Multiple(ZNF: Annotation yielded more than one identification | -2.56 | AAGCCTTATCTCCGGAAGTAA  | NM_001004492: | NM_002995:NM_003175:                                                                                                                                                                                                                                                                          |
| 4593       | MUSK muscle, skeletal, receptor tyrosine kinase               | -1.09 | ACGGCTGGAATGAACCTGAAA  | NM_005592:    | NM_002995:NM_003175:                                                                                                                                                                                                                                                                          |
| 4593       | MUSK muscle, skeletal, receptor tyrosine kinase               | -1.62 | CCCAACATGACCTCCTCAAA   | NM_005592:    | NM_006761:XM_496603:                                                                                                                                                                                                                                                                          |
|            |                                                               |       |                        |               | NM_006761:XM_496603:                                                                                                                                                                                                                                                                          |
|            |                                                               |       |                        |               | NM_014827:NM_017705:NM_031423:NM_145697:                                                                                                                                                                                                                                                      |
|            |                                                               |       |                        |               | NM_152701:XM_498954:                                                                                                                                                                                                                                                                          |
|            |                                                               |       |                        |               | NM_022473:NM_033044:                                                                                                                                                                                                                                                                          |
|            |                                                               |       |                        |               | NM_001002261:NM_001002262:NM_001005466:NM_001115:NM_144588:NM_152701:NM_175056:NM_178844:NM_181846:NM_199044:XM_374898:                                                                                                                                                                       |
|            |                                                               |       |                        |               | NM_003428:NM_031307:                                                                                                                                                                                                                                                                          |
|            |                                                               |       |                        |               | NM_005592:                                                                                                                                                                                                                                                                                    |
|            |                                                               |       |                        |               | NM_005592:                                                                                                                                                                                                                                                                                    |

|        |              |                                                                            |       |                        |            |                                                       |
|--------|--------------|----------------------------------------------------------------------------|-------|------------------------|------------|-------------------------------------------------------|
| 4594   | MUT          | methylmalonyl Coenzyme A mutase                                            | -4.23 | AGGGAATACCTAACTTCGAA   | NM_000255: | NM_000255:                                            |
| 4594   | MUT          | methylmalonyl Coenzyme A mutase                                            | 1.25  | CTGGGCTCACTTAATAGAGAA  | NM_000255: | NM_000255:                                            |
| 4595   | MUTYH        | mutY homolog (E. coli)                                                     | -0.75 | CAAGTGCAGATATCAAGTATA  | NM_012222: | NM_012222:                                            |
| 4595   | MUTYH        | mutY homolog (E. coli)                                                     | 0.82  | CAGGAGGAATTCACACCAGCA  | NM_012222: | NM_012222:                                            |
| 4598   | MVK          | mevalonate kinase (mevalonate aciduria)                                    | -7.55 | CCGCTGGCGATGCCAGCCAA   | NM_000431: | NM_000431:                                            |
| 4598   | MVK          | mevalonate kinase (mevalonate aciduria)                                    | 1.30  | GCGGTGGCCCTGGTTAATAA   | NM_000431: | NM_000431:                                            |
| 9961   | MVP          | major vault protein                                                        | 0.09  | TGGGCTGAGATGCAGGTAAA   | NM_005115: | NM_005115;NM_017458:                                  |
| 9961   | MVP          | major vault protein                                                        | 0.29  | GCCGAGAAAGCTGCAAGGAA   | NM_005115: | NM_005115;NM_017458:                                  |
| 4599   | MX1          | myxovirus (influenza virus) resistance 1, interferon-inducible protein p1  | -0.43 | TAAGATCAAGACACTCATCAA  | NM_002462: | NM_002462:                                            |
| 4599   | MX1          | myxovirus (influenza virus) resistance 1, interferon-inducible protein p1  | -0.16 | TCGGTTAGCCGGTGGTATTTA  | NM_002462: | NM_002462:                                            |
| 4600   | MX2          | myxovirus (influenza virus) resistance 2 (mouse)                           | -0.36 | CAGCATTGTAAGTCTTAATA   | NM_002463: | NM_002463:                                            |
| 4600   | MX2          | myxovirus (influenza virus) resistance 2 (mouse)                           | 0.52  | GAGCAGGATTGAAGACATAAA  | NM_002463: | NM_002463:                                            |
| 4084   | MXD1         | MAX dimerization protein 1                                                 | 0.59  | AGCCAAATTGCACATAAAGAA  | NM_002357: | NM_002357:                                            |
| 4084   | MXD1         | MAX dimerization protein 1                                                 | 0.32  | TACGTTGAGTTTATAACAAA   | NM_002357: | NM_002357:                                            |
| 83463  | MXD3         | MAX dimerization protein 3                                                 | 0.24  | CAGCGGGCGGTGAGTGCACAA  | NM_031300: | NM_031300:                                            |
| 83463  | MXD3         | MAX dimerization protein 3                                                 | 1.09  | CACCTGTGGAAATGAGCTAAA  | NM_031300: | NM_031300:                                            |
| 10608  | MXD4         | MAX dimerization protein 4                                                 | 1.60  | TCCTTATGTCATTGTAATATA  | NM_006454: | NM_006454:                                            |
| 10608  | MXD4         | MAX dimerization protein 4                                                 | 1.79  | TCCAGAAGTATTAAGGTCAT   | NM_006454: | NM_006454:                                            |
| 4601   | MXI1         | MAX interactor 1                                                           | 0.96  | TAGACACACTATCATAGTTAA  | NM_005962: | NM_001008541;NM_130439;NM_005962:                     |
| 4601   | MXI1         | MAX interactor 1                                                           | -2.72 | CTCACTCTTTTAGTGACAAA   | NM_005962: | NM_001008541;NM_130439;NM_005962:                     |
| 25878  | MXRA5        | matrix-remodelling associated 5                                            | 1.04  | CACGTGGGAGTACCAGGATAA  | NM_015419: | NM_015419:                                            |
| 25878  | MXRA5        | matrix-remodelling associated 5                                            | 1.18  | CGGTACCTTTAGTGATACGGAA | NM_015419: | NM_015419:                                            |
| 4602   | MYB          | v-myb myeloblastosis viral oncogene homolog (avian)                        | -4.53 | CTGGCAGAACTGATAATGCTA  | NM_005375: | NM_005375:                                            |
| 4602   | MYB          | v-myb myeloblastosis viral oncogene homolog (avian)                        | -0.05 | TTGGGATATATCATTCTCAA   | NM_005375: | NM_005375:                                            |
| 4605   | MYBL2        | v-myb myeloblastosis viral oncogene homolog (avian)-like 2                 | 0.93  | CACCTGAACTCTACCATCAA   | NM_002466: | NM_002466:                                            |
| 4605   | MYBL2        | v-myb myeloblastosis viral oncogene homolog (avian)-like 2                 | -0.13 | CCAGGGCTCTTGGAGGCCAA   | NM_002466: | NM_002466:                                            |
| 4607   | MYBPC3       | myosin binding protein C, cardiac                                          | 1.14  | CAGGATGTGGCAACACGGAA   | NM_000256: | NM_000256:                                            |
| 4607   | MYBPC3       | myosin binding protein C, cardiac                                          | 0.05  | CCGCATAAAGGTGCCACAT    | NM_000256: | NM_000256:                                            |
| 4609   | MYC          | v-myc myelocytomatosis viral oncogene homolog (avian)                      | -0.11 | AACGTTTATAGCAGTTACACA  | NM_002467: | NM_002467:                                            |
| 4609   | MYC          | v-myc myelocytomatosis viral oncogene homolog (avian)                      | -2.56 | CCCAAGTAGTATCTCTTAAA   | NM_002467: | NM_002467:                                            |
| 23077  | MYCBP2       | MYC binding protein 2                                                      | 0.24  | CACGAGTAAAGCTATTCTCTA  | NM_015057: | NM_015057:                                            |
| 23077  | MYCBP2       | MYC binding protein 2                                                      | -1.93 | AAGGAGTAGTTTAAATAGCCA  | NM_015057: | NM_015057:                                            |
| 4610   | MYCL1        | v-myc myelocytomatosis viral oncogene homolog 1, lung carcinoma derivative | 0.11  | CTCCAGTTGGCTTACTTTAA   | NM_005376: | NM_005376:                                            |
| 4610   | MYCL1        | v-myc myelocytomatosis viral oncogene homolog 1, lung carcinoma derivative | 0.83  | CTGGGCTAGTGACAAAATAA   | NM_005376: | NM_005376:                                            |
| 4613   | MYCN         | v-myc myelocytomatosis viral related oncogene, neuroblastoma derivative    | -0.26 | ATGACCGTATGACATAAATAA  | BC002712:  | NM_005378:                                            |
| 4613   | MYCN         | v-myc myelocytomatosis viral related oncogene, neuroblastoma derivative    | -0.41 | CAGCAGCAGTTGTCAAAGAAA  | BC002712:  | NM_005378:                                            |
| 4615   | MYD88 (myel) | myeloid differentiation primary response gene (88)                         | 2.20  | CATCCTGAGTTTATAATAA    | NM_002468: | NM_002468:                                            |
| 4615   | MYD88 (myel) | myeloid differentiation primary response gene (88)                         | 0.71  | CAGAGAGTAGCTGTGTTGAA   | NM_002468: | NM_002468:                                            |
| 4617   | MYF5 (myog)  | myogenic factor 5                                                          | 0.19  | CCACTTTATAAGAAAGTGAT   | NM_005593: | NM_005593:                                            |
| 4617   | MYF5 (myog)  | myogenic factor 5                                                          | 1.30  | TCCTGATGATCAAAATGATA   | NM_005593: | NM_005593:                                            |
| 4618   | MYF6         | myogenic factor 6 (herculin)                                               | 1.36  | TCCTGGTATGTAATATTTAA   | NM_002469: | NM_002469:                                            |
| 4618   | MYF6         | myogenic factor 6 (herculin)                                               | 1.12  | TGGGAGGATCCCTGGTATTGA  | NM_002469: | NM_002469:                                            |
| 4628   | MYH10        | myosin, heavy polypeptide 10, non-muscle                                   | 0.52  | CAGGAATACTATCTTATT     | NM_005964: | NM_005964:                                            |
| 4628   | MYH10        | myosin, heavy polypeptide 10, non-muscle                                   | -0.64 | CCCATGTTGCTTCTCACATA   | NM_005964: | NM_005964:                                            |
| 57644  | MYH7B        | myosin, heavy polypeptide 7B, cardiac muscle, beta                         | -1.27 | CCGGCCCAAGCTCTACGACAA  | XM_371398: | NM_020884:                                            |
| 57644  | MYH7B        | myosin, heavy polypeptide 7B, cardiac muscle, beta                         | 0.69  | TCGGGGATTTGACAGCTAT    | XM_371398: | NM_020884:                                            |
| 4627   | MYH9         | myosin, heavy polypeptide 9, non-muscle                                    | 0.00  | AACCGGCAAGCCATGCAAAA   | NM_002473: | NM_002473:                                            |
| 4627   | MYH9         | myosin, heavy polypeptide 9, non-muscle                                    | 0.16  | TCCACTGAGCATCAACAATAA  | NM_002473: | NM_002473:                                            |
| 4634   | MYL3         | myosin, light polypeptide 3, alkali; ventricular, skeletal, slow           | -1.93 | CACACCAAGTGTGAGATGAA   | NM_000258: | NM_000258:                                            |
| 4634   | MYL3         | myosin, light polypeptide 3, alkali; ventricular, skeletal, slow           | -0.44 | CAGATTGAAGAGTTCAAGGAA  | NM_000258: | NM_000258:                                            |
| 4637   | MYL6         | myosin, light polypeptide 6, alkali; smooth muscle and non-muscle          | 0.95  | ACCTTAGGAGATTATGTCGAA  | NM_021019: | NM_021019;NM_079423;NM_079424;NM_079425:              |
| 4637   | MYL6         | myosin, light polypeptide 6, alkali; smooth muscle and non-muscle          | -4.17 | TAGGCTTTCTGTCTCAGGAA   | NM_021019: | NM_021019;NM_079423;NM_079424;NM_079425:              |
| 58498  | MYL7         | myosin, light polypeptide 7, regulatory                                    | -0.56 | AACGTGGTTCTCCACGCTCT   | NM_021223: | NM_021223:                                            |
| 58498  | MYL7         | myosin, light polypeptide 7, regulatory                                    | -0.10 | TCGTGATGGCATCATCTGCA   | NM_021223: | NM_021223:                                            |
| 29116  | MYLIP        | myosin regulatory light chain interacting protein                          | -4.93 | ATCGGGTGCATATAGCTTAA   | NM_013262: | NM_013262:                                            |
| 29116  | MYLIP        | myosin regulatory light chain interacting protein                          | 1.08  | AAGTAAGTGCTAAGTATTTAA  | NM_013262: | NM_013262:                                            |
| 4638   | MYLK         | myosin, light polypeptide kinase                                           | -0.94 | AACCTGAAATCCGCTAGCAAAA | NM_005965: | NM_005965;NM_053030;NM_053029;NM_053028:              |
| 4638   | MYLK         | myosin, light polypeptide kinase                                           | 1.07  | CAGCATCCATGGCTAATGAAA  | NM_005965: | NM_005965;NM_053030;NM_053029;NM_053028:              |
| 85366  | MYLK2        | myosin light chain kinase 2, skeletal muscle                               | -0.51 | AACGCTGTAACCGACGCTTAA  | NM_033118: | NM_033118:                                            |
| 85366  | MYLK2        | myosin light chain kinase 2, skeletal muscle                               | 0.09  | CGGGATCCTCTTATGACAAA   | NM_033118: | NM_033118:                                            |
| 53904  | MYO3A        | myosin IIIA                                                                | 1.14  | TAGGATATCAATCTATAATAA  | NM_017433: | NM_017433:                                            |
| 53904  | MYO3A        | myosin IIIA                                                                | -3.40 | CAGGAGAAAGGGAACCTCAA   | NM_017433: | NM_017433:                                            |
| 140469 | MYO3B (myo)  | myosin IIIB                                                                | 0.52  | AACCAGTTAAATGGAACCTCA  | NM_138995: | NM_138995:                                            |
| 140469 | MYO3B (myo)  | myosin IIIB                                                                | 0.75  | ACCCTGGTGTAAATTTGAA    | NM_138995: | NM_138995:                                            |
| 4653   | MYOC         | myocilin, trabecular meshwork inducible glucocorticoid response            | -0.62 | CAGCATCGAATAAAGTAAAG   | NM_000261: | NM_000261:                                            |
| 4653   | MYOC         | myocilin, trabecular meshwork inducible glucocorticoid response            | 0.61  | CAGCATTATGGGATGTTTAA   | NM_000261: | NM_000261:                                            |
| 4654   | MYOD1        | myogenic differentiation 1                                                 | 0.57  | TACAGGAAATTTGACGTTTA   | NM_002478: | NM_002478:                                            |
| 4654   | MYOD1        | myogenic differentiation 1                                                 | 0.22  | CTGCACGTGAGCAATCCAAA   | NM_002478: | NM_002478:                                            |
| 4656   | MYOG         | myogenin (myogenic factor 4)                                               | -0.13 | CTGCCTGAATTTGAGAGAGAA  | NM_002479: | NM_002479:                                            |
| 4656   | MYOG         | myogenin (myogenic factor 4)                                               | -1.28 | CCAAGTGAATTTGCTCCGAA   | NM_002479: | NM_002479:                                            |
| 11143  | MYST2        | MYST histone acetyltransferase 2                                           | -0.46 | ACAGCTGATCATGATGAGTCA  | NM_007067: | NM_007067:                                            |
| 11143  | MYST2        | MYST histone acetyltransferase 2                                           | 0.73  | CAGAAAGAGAAATATATGGAA  | NM_007067: | NM_007067:                                            |
| 7994   | MYST3        | MYST histone acetyltransferase (monocytic leukemia) 3                      | -5.22 | CAGCTGAATTTGCGACCTGTA  | NM_006766: | NM_006766:                                            |
| 7994   | MYST3        | MYST histone acetyltransferase (monocytic leukemia) 3                      | -1.21 | CTGACTCTCCGTAGTGACCAA  | NM_006766: | NM_006766:                                            |
| 23522  | MYST4        | MYST histone acetyltransferase (monocytic leukemia) 4                      | -0.25 | ACGGAACATGGCTGCATCAAA  | NM_012330: | NM_012330:                                            |
| 23522  | MYST4        | MYST histone acetyltransferase (monocytic leukemia) 4                      | -0.70 | CAGCAGTAACTAATACACTT   | NM_012330: | NM_012330:                                            |
| 10003  | NAALAD2      | N-acetylated alpha-linked acidic dipeptidase 2                             | 0.93  | ACGGTGGAACTGGTATCCGA   | NM_005467: | NM_005467:                                            |
| 10003  | NAALAD2      | N-acetylated alpha-linked acidic dipeptidase 2                             | 0.67  | AAGAACATGATCAACAATAA   | NM_005467: | NM_005467:                                            |
| 4666   | NACA         | nascent-polypeptide-associated complex alpha polypeptide                   | -8.12 | CTGTTCCACAGATCCAGAAA   | NM_005594: | NM_005594:                                            |
| 65220  | NADK         | NAD kinase                                                                 | -0.53 | AAAGAGCGCTCCTGTCACTAA  | NM_023018: | NM_023018:                                            |
| 65220  | NADK         | NAD kinase                                                                 | 0.55  | CCAGGAGAACATGATCGTGTG  | NM_023018: | NM_023018:                                            |
| 64753  | NAG6         | hypothetical protein DKFZp434G156                                          | -0.01 | CAGAGGAAATAGATGGACTA   | NM_022742: | NM_022742:                                            |
| 64753  | NAG6         | hypothetical protein DKFZp434G156                                          | -0.35 | CAGGAGCTACTACCAAGTTA   | NM_022742: | NM_022742:                                            |
| 4668   | NAGA         | N-acetylgalactosaminidase, alpha-                                          | -2.76 | ATGTTAGAGAGTGAACCTCCA  | NM_000262: | NM_000262:                                            |
| 4668   | NAGA         | N-acetylgalactosaminidase, alpha-                                          | 0.08  | CAGGACATTTATTCCTTCTA   | NM_000262: | NM_000262:                                            |
| 55577  | NAGK         | N-acetylglucosamine kinase                                                 | -0.01 | ACCTGAGTGAAGGACTTAA    | NM_017567: | NM_017567:                                            |
| 55577  | NAGK         | N-acetylglucosamine kinase                                                 | -0.26 | CCCGGCTTGTTCACAGGCA    | NM_017567: | NM_017567:                                            |
| 4669   | NAGLU        | N-acetylglucosaminidase, alpha- (Sanfilippo disease IIIB)                  | 0.01  | CAAGAAGATCTTCTCAATAA   | NM_000263: | NM_000263:                                            |
| 4669   | NAGLU        | N-acetylglucosaminidase, alpha- (Sanfilippo disease IIIB)                  | -0.57 | CAGCCAGAAGCAAGTGGTCTA  | NM_000263: | NM_000263:                                            |
| 22861  | NALP1        | NACHT, leucine rich repeat and PYD (pyrin domain) containing 1             | 0.02  | CAGCTTCTGCTGCCAATAAAA  | NM_014922: | NM_014922;NM_033004;NM_001033053;NM_033006;NM_033007: |
| 22861  | NALP1        | NACHT, leucine rich repeat and PYD (pyrin domain) containing 1             | -1.45 | GAGGTAACACTTCTAATTGCA  | NM_014922: | NM_014922;NM_033004;NM_001033053;NM_033006;NM_033007: |
| 204801 | NALP11       | NACHT, leucine rich repeat and PYD containing 11                           | -2.75 | CAGCCATGAGAACGCTCAATA  | NM_145007: | NM_145007:                                            |
| 204801 | NALP11       | NACHT, leucine rich repeat and PYD containing 11                           | -6.87 | GCCAGGTCAATATACCTTAA   | NM_145007: | NM_145007:                                            |



|        |            |                                                                        |        |                        |               |                                      |
|--------|------------|------------------------------------------------------------------------|--------|------------------------|---------------|--------------------------------------|
| 9476   | NAPSA      | napsin A aspartic peptidase                                            | -3.07  | CCCGGGTGACGCCAAAGTGAA  | NM_004851:    | NM_004851:                           |
| 9476   | NAPSA      | napsin A aspartic peptidase                                            | -1.39  | CACCACCATTGATCCCAA     | NM_004851:    | NM_004851:                           |
| 256236 | NAPSB      | napsin B aspartic peptidase pseudogene                                 | -1.54  | CAGGATTACGTCATCCAGTTT  | XR_000169:    | XR_000169:                           |
| 256236 | NAPSB      | napsin B aspartic peptidase pseudogene                                 | 0.85   | CCGGTGCTCAGAAATCCCAA   | XR_000169:    | XR_000169:                           |
| 80155  | NARG1      | NMDA receptor regulated 1                                              | -1.13  | TGGGATAAAGACAATCTTCAA  | NM_057175:    | NM_057175:                           |
| 80155  | NARG1      | NMDA receptor regulated 1                                              | -0.03  | AAGAAGCTACGTAATAAACAA  | NM_057175:    | NM_057175:                           |
| 79612  | NARG1L     | NMDA receptor regulated 1-like                                         | 0.19   | CAGGAATCTTTGGAACATATA  | NM_018527:    | NM_018527;NM_024561:                 |
| 79612  | NARG1L     | NMDA receptor regulated 1-like                                         | 2.47   | CAAACGCATCTGAAATGTTA   | NM_018527:    | NM_018527;NM_024561:                 |
| 79664  | NARG2      | (NMC NMDA receptor regulated 2                                         | -0.12  | CAGAGTAGAGATGGGATTA    | NM_024611:    | NM_001018089;NM_024611:              |
| 79664  | NARG2      | (NMC NMDA receptor regulated 2                                         | -0.32  | AGGGATTGGAATCATGTGAAA  | NM_024611:    | NM_001018089;NM_024611:              |
| 4683   | NBN        | nibrin                                                                 | 1.66   | AAGGAAGACTGCCTACTATA   | NM_002485:    | NM_002485:                           |
| 4683   | NBN        | nibrin                                                                 | -0.66  | ATGGATATGCTCCAAAGGCAA  | NM_002485:    | NM_001024688;NM_002485:              |
| 4077   | NBR1       | neighbor of BRCA1 gene 1                                               | 0.40   | CTGGTGCAATCATAGTAGA    | NM_005899:    | NM_005899;NM_031858:                 |
| 4077   | NBR1       | neighbor of BRCA1 gene 1                                               | -1.52  | CAGCTTAACTCCATAGGAAA   | NM_005899:    | NM_031862;NM_005899;NM_031858:       |
| 4684   | NCAM1      | neural cell adhesion molecule 1                                        | -3.40  | CAGCGCGGCTCCGAGTTCAA   | NM_000615:    | NM_181351;NM_000615:                 |
| 4684   | NCAM1      | neural cell adhesion molecule 1                                        | -0.30  | CGAAACAACGTCACCGGTAA   | NM_000615:    | NM_181351;NM_000615:                 |
| 22916  | NCBP2      | nuclear cap binding protein subunit 2, 20kDa                           | -0.93  | AAGCCTCGAAGTTATTAA     | NM_007362:    | NM_007362:                           |
| 22916  | NCBP2      | nuclear cap binding protein subunit 2, 20kDa                           | -0.08  | CCGCTTAACTGAGTGTAGAA   | NM_007362:    | NM_007362:                           |
| 4688   | NCF2       | neutrophil cytosolic factor 2 (65kDa, chronic granulomatous disease, ε | -0.21  | CAGTTTGGAAAGTGTAACTAT  | NM_000433:    | NM_000433:                           |
| 4688   | NCF2       | neutrophil cytosolic factor 2 (65kDa, chronic granulomatous disease, ε | -3.07  | CAAGTACACGGTATGATGAA   | NM_000433:    | NM_000433:                           |
| 4690   | NCK1       | NCK adaptor protein 1                                                  | -1.58  | ACAGGCCATTTGAAATACCAA  | NM_006153:    | NM_006153:                           |
| 4690   | NCK1       | NCK adaptor protein 1                                                  | -0.78  | ACCGTTATGCGAATAATCCA   | NM_006153:    | NM_006153:                           |
| 8440   | NCK2       | NCK adaptor protein 2                                                  | -2.24  | TGCGGTTTGTGAACTCACA    | NM_001004720: | NM_003581;NM_001004720;NM_001004722: |
| 8440   | NCK2       | NCK adaptor protein 2                                                  | -1.71  | TAGCCGTTTGTGACACTAAT   | NM_001004720: | NM_003581;NM_001004720;NM_001004722: |
| 10787  | NCKAP1     | NCK-associated protein 1                                               | 1.17   | GAGGCTAATAAACGTTATA    | NM_013436:    | NM_013436;NM_205842:                 |
| 10787  | NCKAP1     | NCK-associated protein 1                                               | 0.64   | TTCACGTAGATATTCTTATA   | NM_013436:    | NM_013436;NM_205842:                 |
| 4691   | NCL        | nucleolin                                                              | -3.52  | ATCCGCTAGTTAACATTTCA   | NM_005381:    | NM_005381:                           |
| 4691   | NCL        | nucleolin                                                              | 0.76   | TTGACTGGATTTTCATATA    | NM_005381:    | NM_005381:                           |
| 8648   | NCOA1      | nuclear receptor coactivator 1                                         | -1.04  | CTCCTAATTTTGCACATTA    | NM_003743:    | NM_147223;NM_147233;NM_003743:       |
| 8648   | NCOA1      | nuclear receptor coactivator 1                                         | 1.80   | CCCAAATTAACGAGTTATA    | NM_003743:    | NM_147223;NM_147233;NM_003743:       |
| 10499  | NCOA2      | nuclear receptor coactivator 2                                         | 0.01   | AGGCGTGTAAACATTAGCAA   | NM_006540:    | NM_006540:                           |
| 10499  | NCOA2      | nuclear receptor coactivator 2                                         | -2.13  | AAGGATTGGCATTGACGAAA   | NM_006540:    | NM_006540:                           |
| 8202   | NCOA3      | nuclear receptor coactivator 3                                         | -1.22  | AAGTTGTCAATATAGATACA   | NM_006534:    | NM_006534;NM_181659:                 |
| 8202   | NCOA3      | nuclear receptor coactivator 3                                         | -1.96  | CAGGAGGAGATTATAATCTT   | NM_006534:    | NM_006534;NM_181659:                 |
| 8031   | NCOA4      | nuclear receptor coactivator 4                                         | -1.71  | ACCGACTAAGCAAATAGGCAA  | NM_005437:    | NM_005437:                           |
| 8031   | NCOA4      | nuclear receptor coactivator 4                                         | -1.96  | CTGGTCAATAGTATTACCAA   | NM_005437:    | NM_005437:                           |
| 57727  | NCOA5      | nuclear receptor coactivator 5                                         | -0.81  | CGCGCTGGTACGATATTAA    | NM_020967:    | NM_020967:                           |
| 57727  | NCOA5      | nuclear receptor coactivator 5                                         | 0.46   | CAGAGGCTTACTGAAGCTAA   | NM_020967:    | NM_020967:                           |
| 23054  | NCOA6      | nuclear receptor coactivator 6                                         | 1.12   | CAGAATTTAGTCTCAAAGGAA  | NM_014071:    | NM_014071:                           |
| 23054  | NCOA6      | nuclear receptor coactivator 6                                         | 2.62   | CCACAGATTAATATTCCTTAA  | NM_014071:    | NM_014071:                           |
| 96764  | NCOA6IP    | nuclear receptor coactivator 6 interacting protein                     | 0.06   | ATGGAACCTTACAGGACTTAA  | NM_024831:    | NM_024831:                           |
| 96764  | NCOA6IP    | nuclear receptor coactivator 6 interacting protein                     | 0.44   | TGCGAATATGCGAAGTTTAA   | NM_024831:    | NM_024831:                           |
| 135112 | NCOA7      | nuclear receptor coactivator 7                                         | 0.54   | CGGAAATCGGCATCACTAGA   | NM_181782:    | NM_181782:                           |
| 135112 | NCOA7      | nuclear receptor coactivator 7                                         | 0.11   | AACAATTTATTACTCCTTAA   | NM_181782:    | NM_181782:                           |
| 9611   | NCOR1      | nuclear receptor co-repressor 1                                        | 0.37   | ACCGCAGTATTGTCCAAATTA  | NM_006311:    | NM_006311:                           |
| 9611   | NCOR1      | nuclear receptor co-repressor 1                                        | 0.05   | AGGCAATTCAGTGGACTATA   | NM_006311:    | NM_006311:                           |
| 9612   | NCOR2      | nuclear receptor co-repressor 2                                        | 0.78   | CAGAATGAATTCGATGCGTAT  | NM_006312:    | NM_006312:                           |
| 9612   | NCOR2 ( ?  | nuclear receptor co-repressor 2                                        | 0.69   | AACGAGATTTGCTGGAACCAA  | NM_006312:    | NM_006312:                           |
| 9437   | NCR1       | natural cytotoxicity triggering receptor 1                             | -4.96  | AAGCATGTTCTTACTGCTCAA  | NM_004829:    | NM_004829:                           |
| 9437   | NCR1       | natural cytotoxicity triggering receptor 1                             | 0.46   | ATGGTTGATATTTCTTAATA   | NM_004829:    | NM_004829:                           |
| 9436   | NCR2       | natural cytotoxicity triggering receptor 2                             | 1.42   | ACACACTTTTGAATAATAAA   | NM_004828:    | NM_004828:                           |
| 9436   | NCR2       | natural cytotoxicity triggering receptor 2                             | -0.62  | CACGGGCGAGTCTACGAGAAA  | NM_004828:    | NM_004828:                           |
| 259197 | NCR3       | natural cytotoxicity triggering receptor 3                             | 0.16   | AACACTGTCAATCACCAGTAA  | NM_147130:    | NM_147130:                           |
| 259197 | NCR3       | natural cytotoxicity triggering receptor 3                             | 0.34   | ACCGTCTATTACCAGGGGAAA  | NM_147130:    | NM_147130:                           |
| 23385  | NCSTN      | nicastrin                                                              | 0.13   | TCAGATTGGGATTAACATAAA  | NM_015331:    | NM_015331:                           |
| 23385  | NCSTN      | nicastrin                                                              | -0.11  | AAGTTTAAATGTCAGGGTCAA  | NM_015331:    | NM_015331:                           |
| 4692   | NDN        | neclin homolog (mouse)                                                 | 1.19   | CCACCGTGAGTCAACTTAAA   | NM_002487:    | NM_002487:                           |
| 4692   | NDN        | neclin homolog (mouse)                                                 | 0.00   | CCCACCGTGAGTCAACTTAAA  | NM_002487:    | NM_002487:                           |
| 4693   | NDP        | Norrie disease (pseudoglioma)                                          | -0.01  | CACGGGTCATCTCTAATA     | NM_000266:    | NM_000266:                           |
| 4693   | NDP        | Norrie disease (pseudoglioma)                                          | 0.76   | AGCCAGCGAAGTCAACTTAAA  | NM_000266:    | NM_000266:                           |
| 4724   | NDUFS4     | NADH dehydrogenase (ubiquinone) Fe-S protein 4, 18kDa (NADH-coe        | 1.72   | TCCTAATAAATTTGGACATTA  | NM_002495:    | NM_002495:                           |
| 4724   | NDUFS4     | NADH dehydrogenase (ubiquinone) Fe-S protein 4, 18kDa (NADH-coe        | 0.70   | ATCTCTAATCTCCTAATAAA   | NM_002495:    | NM_002495:                           |
| 4723   | NDUFV1     | NADH dehydrogenase (ubiquinone) flavoprotein 1, 51kDa                  | -1.41  | CGCGCTAATTTGAGTTCTATA  | NM_007103:    | NM_007103:                           |
| 4723   | NDUFV1     | NADH dehydrogenase (ubiquinone) flavoprotein 1, 51kDa                  | -0.14  | CGCGTCGACGGACATCGTGAA  | NM_007103:    | NM_007103:                           |
| 4729   | NDUFV2 (NA | NADH dehydrogenase (ubiquinone) flavoprotein 2, 24kDa                  | -31.62 | CAGGCTTTAATTTATTATTGA  | NM_021074:    | NM_021074:                           |
| 4729   | NDUFV2 (NA | NADH dehydrogenase (ubiquinone) flavoprotein 2, 24kDa                  | 0.06   | CAAGCAGGCTTTAATTTATA   | NM_021074:    | NM_021074:                           |
| 4703   | NEB        | nebulin                                                                | 0.56   | CCGAAGCTTACACATGATTA   | NM_004543:    | NM_004543:                           |
| 4703   | NEB        | nebulin                                                                | 0.50   | CCAGATGCTGTCATATCAAA   | NM_004543:    | NM_004543:                           |
| 4734   | NEDD4      | neural precursor cell expressed, developmentally down-regulated 4      | -1.40  | ATGGAGTTGATTAGATTACAA  | NM_006154:    | NM_198400;NM_006154:                 |
| 4734   | NEDD4      | neural precursor cell expressed, developmentally down-regulated 4      | 0.00   | CGGAGAATTTATGGGTGTCAA  | NM_006154:    | NM_198400;NM_006154:                 |
| 23327  | NEDD4L     | neural precursor cell expressed, developmentally down-regulated 4-like | 0.00   | CCCTTACTCCAGAGAATTTAA  | NM_015277:    | NM_015277:                           |
| 23327  | NEDD4L     | neural precursor cell expressed, developmentally down-regulated 4-like | 0.73   | GCGGTCAAAGACATCTTTAAA  | NM_015277:    | NM_015277:                           |
| 4738   | NEDD8      | neural precursor cell expressed, developmentally down-regulated 8      | 1.91   | CTGGAAAGAGATGCTAATTA   | NM_006156:    | NM_006156:                           |
| 4738   | NEDD8      | neural precursor cell expressed, developmentally down-regulated 8      | -0.90  | ATGCCAGTAATGATGTGCTA   | NM_006156:    | NM_006156:                           |
| 4744   | NEFH       | neurofilament, heavy polypeptide 200kDa                                | -0.56  | AAGGATCAGAGTAACACAAAT  | NM_021076:    | NM_021076:                           |
| 4744   | NEFH       | neurofilament, heavy polypeptide 200kDa                                | 0.32   | AAGGAAGACGCTAAACCCAAA  | NM_021076:    | NM_021076:                           |
| 4747   | NEFL       | neurofilament, light polypeptide 68kDa                                 | 2.20   | AAAGAGTGAATGGCAGGATA   | NM_006158:    | NM_006158:                           |
| 4747   | NEFL       | neurofilament, light polypeptide 68kDa                                 | 0.48   | CAGGACACGATCAACAAATTA  | NM_006158:    | NM_006158:                           |
| 79661  | NEIL1      | nei endonuclease VIII-like 1 (E. coli)                                 | 0.05   | ATGATGTTGTTTATGAGTTA   | NM_024608:    | NM_024608:                           |
| 79661  | NEIL1      | nei endonuclease VIII-like 1 (E. coli)                                 | 0.84   | CGACTGTTGCTGGTCTTAA    | NM_024608:    | NM_024608:                           |
| 252969 | NEIL2      | nei like 2 (E. coli)                                                   | 0.07   | ACCAGGTCATGGAAGAAA     | NM_145043:    | NM_145043:                           |
| 252969 | NEIL2      | nei like 2 (E. coli)                                                   | 0.42   | CAGCGTTGGGTGAACGATTT   | NM_145043:    | NM_145043:                           |
| 55247  | NEIL3      | nei endonuclease VIII-like 3 (E. coli)                                 | -0.70  | ACGGATTCATTTCGGAATGAA  | NM_018248:    | NM_018248:                           |
| 55247  | NEIL3      | nei endonuclease VIII-like 3 (E. coli)                                 | -0.57  | CCTGGATTTCTAACAGTGAA   | NM_018248:    | NM_018248:                           |
| 4750   | NEK1       | NIMA (never in mitosis gene a)-related kinase 1                        | 0.27   | ACCGTAGGAGATGTTGCTCAA  | NM_012224:    | NM_012224:                           |
| 4750   | NEK1       | NIMA (never in mitosis gene a)-related kinase 1                        | 0.01   | TAGGGATAGACCATCAAGTCAA | NM_012224:    | NM_012224:                           |
| 152110 | NEK10      | NIMA (never in mitosis gene a)-related kinase 10                       | -0.25  | ATGGTAGTACTACTAGATCA   | NM_152534:    | NM_152534:                           |
| 152110 | NEK10      | NIMA (never in mitosis gene a)-related kinase 10                       | 0.34   | CGGGAACCCGTCACATGTCA   | NM_152534:    | NM_152534;NM_001031741:              |
| 79858  | NEK11      | NIMA (never in mitosis gene a)-related kinase 11                       | -1.94  | CTGCCTATGCTGGAGTCATA   | NM_024800:    | NM_024800:                           |
| 79858  | NEK11      | NIMA (never in mitosis gene a)-related kinase 11                       | 1.04   | TGAGATAAGCTTATAGATCAA  | NM_024800:    | NM_024800:                           |
| 4751   | NEK2       | NIMA (never in mitosis gene a)-related kinase 2                        | 1.14   | AACATGAGATGTGACACTCTA  | NM_002497:    | NM_002497:                           |
| 4751   | NEK2       | NIMA (never in mitosis gene a)-related kinase 2                        | 2.45   | CAGGGCAATCCATACCGTTA   | NM_002497:    | NM_002497:                           |
| 4752   | NEK3       | NIMA (never in mitosis gene a)-related kinase 3                        | -0.73  | ACGATAGAGGTGGTCTGTAA   | NM_002498:    | NM_002498;NM_152720:                 |
| 4752   | NEK3       | NIMA (never in mitosis gene a)-related kinase 3                        | -0.13  | CAGAGATATCAAGTCCAGAA   | NM_002498:    | NM_002498;NM_152720:                 |
| 6787   | NEK4       | NIMA (never in mitosis gene a)-related kinase 4                        | -0.01  | CACAATCAGTAGCGTAAATAT  | NM_003157:    | NM_003157:                           |
| 6787   | NEK4       | NIMA (never in mitosis gene a)-related kinase 4                        | -0.73  | CAGACATATATAATGGGTGAA  | NM_003157:    | NM_003157:                           |
| 341676 | NEK5       | NIMA (never in mitosis gene a)-related kinase 5                        | -1.20  | CTGAGACCCGACCATCCATAA  | XM_292160:    | NM_199289:                           |
| 341676 | NEK5       | NIMA (never in mitosis gene a)-related kinase 5                        | -1.39  | CAGGCTGTTTATTGTAATGGA  | XM_292160:    | NM_199289:                           |
| 10783  | NEK6       | NIMA (never in mitosis gene a)-related kinase 6                        | -0.73  | ACCACGGAAGTCGAGAATTA   | NM_014397:    | NM_014397:                           |

|        |                                                   |                                                                         |        |                        |               |                                          |
|--------|---------------------------------------------------|-------------------------------------------------------------------------|--------|------------------------|---------------|------------------------------------------|
| 10783  | NEK6                                              | NIMA (never in mitosis gene a)-related kinase 6                         | -0.46  | ACCGGAGAGGATCCATGAGAA  | NM_014397:    | NM_014397:                               |
| 140609 | NEK7 (NIMA)                                       | NIMA (never in mitosis gene a)-related kinase 7                         | -4.91  | ACGACCGGATATGGGCTATAA  | NM_133494:    | NM_133494:                               |
| 140609 | NEK7 (NIMA)                                       | NIMA (never in mitosis gene a)-related kinase 7                         | -45.65 | CCGGATATGGGCTATAATAACA | NM_133494:    | NM_133494:                               |
| 284086 | NEK8                                              | NIMA (never in mitosis gene a)-related kinase 8                         | -4.94  | ACGGACAGTTGGGCAACCAATA | NM_178170:    | NM_178170:                               |
| 284086 | NEK8                                              | NIMA (never in mitosis gene a)-related kinase 8                         | -3.78  | CCAGAAGCTGGTGATCATCAA  | NM_178170:    | NM_178170:                               |
| 91754  | NEK9                                              | NIMA (never in mitosis gene a)-related kinase 9                         | 1.35   | CACGAACCAAGTGAAGTCTATA | NM_033116:    | NM_033116:                               |
| 91754  | NEK9                                              | NIMA (never in mitosis gene a)-related kinase 9                         | -6.88  | TACACTGGGTGAACATGCAA   | NM_033116:    | NM_033116:                               |
| 26012  | NELF                                              | nasal embryonic LHRH factor                                             | -0.55  | ACCCTCATGTGACCATTAATA  | NM_015537:    | NM_015537:                               |
| 26012  | NELF                                              | nasal embryonic LHRH factor                                             | 0.82   | ACGATGTACGATACCCCTCATA | NM_015537:    | NM_015537:                               |
| 29937  | NENF                                              | neuron derived neurotrophic factor                                      | 0.24   | ACCAAAGTGTACAAAGCCAAA  | NM_013349:    | NM_013349:                               |
| 29937  | NENF                                              | neuron derived neurotrophic factor                                      | 0.63   | CATGACCATGTTCACTTTTATA | NM_013349:    | NM_013349:                               |
| 4756   | NEO1                                              | neogenin homolog 1 (chicken)                                            | 0.04   | CAGCGCTATTACACCATTGAA  | NM_002499:    | NM_002499:                               |
| 4756   | NEO1                                              | neogenin homolog 1 (chicken)                                            | -1.09  | CAGGATTACGTGGGCAGACAA  | NM_002499:    | NM_002499:                               |
| 10276  | NET1                                              | neuroepithelial cell transforming gene 1                                | 0.42   | CTGGAGGATGCTATATTGATA  | NM_005863:    | NM_005863:                               |
| 10276  | NET1                                              | neuroepithelial cell transforming gene 1                                | 0.25   | TCGGTGTGGATTGATTGAAA   | NM_005863:    | NM_005863:                               |
| 81832  | NETO1                                             | neuropilin (NRP) and tolloid (TLL)-like 1                               | 1.50   | CAGGCTGTCCAGACACGATAA  | NM_138966:    | NM_153181.NM_138966:                     |
| 81832  | NETO1                                             | neuropilin (NRP) and tolloid (TLL)-like 1                               | -2.35  | CCGGGAATGCATCTACATCAT  | NM_138966:    | NM_138999.NM_153181.NM_138966:           |
| 81831  | NETO2                                             | neuropilin (NRP) and tolloid (TLL)-like 2                               | 0.30   | CAGGCAGCTATATAGTTTAA   | NM_018092:    | NM_018092:                               |
| 81831  | NETO2                                             | neuropilin (NRP) and tolloid (TLL)-like 2                               | 0.53   | AAGACCTTGATTTACCGTTAA  | NM_018092:    | NM_018092:                               |
| 4758   | NEU1                                              | sialidase 1 (lysosomal sialidase)                                       | -0.11  | ACCACCTGACTGACTATCAA   | NM_000434:    | NM_000434:                               |
| 4758   | NEU1                                              | sialidase 1 (lysosomal sialidase)                                       | -1.10  | CAGGCTAGTGAGCTGTAGAA   | NM_000434:    | NM_000434:                               |
| 9148   | NEURL                                             | neuralized-like (Drosophila)                                            | 0.50   | GTCGCTGTGATTGTGAATAA   | NM_004210:    | NM_004210:                               |
| 9148   | NEURL                                             | neuralized-like (Drosophila)                                            | 0.03   | TTGGTCCGCTGTGATTGAAA   | NM_004210:    | NM_004210:                               |
| 140825 | NEURL2                                            | neuralized-like 2 (Drosophila)                                          | 0.18   | AACCCCTCCTCGTGAACCCATA | NM_080749:    | NM_080749:                               |
| 140825 | NEURL2                                            | neuralized-like 2 (Drosophila)                                          | 0.28   | AAGTGATACAAAGGAGCATGG  | NM_080749:    | NM_080749:                               |
| 4760   | NEUROD1                                           | neurogenic differentiation 1                                            | -1.87  | CCCATGGTGGGTTGTCTATATA | NM_002500:    | NM_002500:                               |
| 4760   | NEUROD1                                           | neurogenic differentiation 1                                            | 0.20   | CAAGCTGTATATACATATTA   | NM_002500:    | NM_002500:                               |
| 4761   | NEUROD2                                           | neurogenic differentiation 2                                            | -2.14  | CAAGACAATTTGTAACTAGAA  | NM_006160:    | NM_006160:                               |
| 4761   | NEUROD2                                           | neurogenic differentiation 2                                            | 1.01   | CTCGGAGAATCTCTGTCTTAA  | NM_006160:    | NM_006160:                               |
| 58158  | NEUROD4                                           | neurogenic differentiation 4                                            | 0.26   | CACGAGGATAAATCTCTCTATT | NM_021191:    | NM_021191:                               |
| 58158  | NEUROD4                                           | neurogenic differentiation 4                                            | -3.40  | CAGGTACTTATGGGATGCTCA  | NM_021191:    | NM_021191:                               |
| 63974  | NEUROD6                                           | neurogenic differentiation 6                                            | 0.02   | CAGGTTTGTATCACAATGTA   | NM_022728:    | NM_022728:                               |
| 63974  | NEUROD6                                           | neurogenic differentiation 6                                            | -1.84  | TTGGTAACTATTCCTCTTCAA  | NM_022728:    | NM_022728:                               |
| 4762   | NEUROG1                                           | neurogenin 1                                                            | 1.30   | CAGACGCTCATGTAATAATAA  | NM_006161:    | NM_006161:                               |
| 4762   | NEUROG1                                           | neurogenin 1                                                            | -0.14  | CAGGCTGTGAGAGACTTTTAA  | NM_006161:    | NM_006161:                               |
| 91624  | NEXN                                              | nexilin (F actin binding protein)                                       | 1.86   | ATGGAGAAGACTATCAATATA  | NM_144573:    | NM_144573:                               |
| 91624  | NEXN                                              | nexilin (F actin binding protein)                                       | 0.05   | CTCCATTTACTCACAAAGTGA  | NM_144573:    | NM_144573:                               |
| 4763   | NF1                                               | neurofibromin 1 (neurofibromatosis, von Recklinghausen disease, Wa      | -1.69  | CAGGTGGCTGGGATCAATAA   | NM_000267:    | NM_000267:                               |
| 4763   | NF1                                               | neurofibromin 1 (neurofibromatosis, von Recklinghausen disease, Wa      | -0.25  | TACAGTAATGACATAACCCAA  | NM_000267:    | NM_000267:                               |
|        |                                                   |                                                                         |        |                        |               | NM_181826.NM_000268.NM_016418.NM_181835: |
|        |                                                   |                                                                         |        |                        |               | NM_181833.NM_181827.NM_181831.NM_181832: |
|        |                                                   |                                                                         |        |                        |               | NM_181829.NM_181825.NM_181834.NM_181830: |
|        |                                                   |                                                                         |        |                        |               | NM_181828:                               |
| 4771   | NF2                                               | neurofibromin 2 (bilateral acoustic neuroma)                            | -1.40  | CACCGTAGGATGTCACCCAT   | NM_000268:    | NM_181826.NM_000268.NM_016418.NM_181835: |
|        |                                                   |                                                                         |        |                        |               | NM_181833.NM_181827.NM_181831.NM_181832: |
|        |                                                   |                                                                         |        |                        |               | NM_181829.NM_181825.NM_181834.NM_181830: |
|        |                                                   |                                                                         |        |                        |               | NM_181828:                               |
| 4771   | NF2                                               | neurofibromin 2 (bilateral acoustic neuroma)                            | -0.68  | CCGGTCCGCGCTGCACCCGAA  | NM_000268:    | NM_138713.NM_138714.NM_173214.NM_173215: |
|        |                                                   |                                                                         |        |                        |               | NM_006599:                               |
| 10725  | NFAT5                                             | nuclear factor of activated T-cells 5, tonicity-responsive              | -1.56  | CAGCTGGTCTTTGAATGTAA   | NM_006599:    | NM_006599:                               |
| 10725  | NFAT5                                             | nuclear factor of activated T-cells 5, tonicity-responsive              | -0.97  | CAGGAGTGCCAGAAATCTTAA  | NM_006599:    | NM_138713.NM_138714.NM_173214.NM_173215: |
|        |                                                   |                                                                         |        |                        |               | NM_006599:                               |
| 4772   | NFATC1                                            | nuclear factor of activated T-cells, cytoplasmic, calcineurin-dependent | 0.77   | CACGGAAGAAACCACTGAA    | NM_006162:    | NM_172387.NM_172389.NM_172388.NM_006162: |
| 4772   | NFATC1                                            | nuclear factor of activated T-cells, cytoplasmic, calcineurin-dependent | 0.36   | AAGCATGGTTTATTCATTGAA  | NM_006162:    | NM_172387.NM_172389.NM_172388.NM_006162: |
| 4773   | NFATC2                                            | nuclear factor of activated T-cells, cytoplasmic, calcineurin-dependent | 0.09   | CTGCCATGGTTGAAAGACAA   | NM_012340:    | NM_173091.NM_012340:                     |
| 4773   | NFATC2                                            | nuclear factor of activated T-cells, cytoplasmic, calcineurin-dependent | -0.86  | BTGGTCTATGGCGCCAGCAA   | NM_012340:    | NM_173091.NM_012340:                     |
| 4775   | NFATC3                                            | nuclear factor of activated T-cells, cytoplasmic, calcineurin-dependent | 0.09   | TTGGATCTCAGTATCCTTTAA  | NM_004555:    | NM_004555.NM_173163.NM_173164.NM_173165: |
| 4775   | NFATC3                                            | nuclear factor of activated T-cells, cytoplasmic, calcineurin-dependent | 1.82   | TGGGATATCATGTTCAAATA   | NM_004555:    | NM_004555.NM_173163.NM_173164.NM_173165: |
| 4776   | NFATC4                                            | nuclear factor of activated T-cells, cytoplasmic, calcineurin-dependent | 1.19   | AAACAGCTTATACAATTCAA   | NM_004554:    | NM_004554:                               |
| 4776   | NFATC4                                            | nuclear factor of activated T-cells, cytoplasmic, calcineurin-dependent | -3.89  | CAGCAGCAAAGTCCAGCCAA   | NM_004554:    | NM_004554:                               |
| 4781   | NFIB                                              | nuclear factor I/B                                                      | 0.31   | ACAGAGGGCAAGTCAATTTA   | NM_005596:    | NM_005596:                               |
| 4781   | NFIB                                              | nuclear factor I/B                                                      | -1.65  | AAGTTAACTGTAATGACAT    | NM_005596:    | NM_005596:                               |
| 4790   | NFKB1                                             | nuclear factor of kappa light polypeptide gene enhancer in B-cells 1 (f | -2.79  | CTGGTATACTCTATGTGACA   | NM_003998:    | NM_003998:                               |
| 4790   | NFKB1                                             | nuclear factor of kappa light polypeptide gene enhancer in B-cells 1 (f | -1.51  | GACCCATCTATGACAGTAA    | NM_003998:    | NM_003998:                               |
| 4792   | NFKBIA                                            | nuclear factor of kappa light polypeptide gene enhancer in B-cells inh  | -2.59  | AAGGGTGTACTATATCCACA   | NM_020529:    | NM_020529:                               |
| 4792   | NFKBIA                                            | nuclear factor of kappa light polypeptide gene enhancer in B-cells inh  | 0.21   | CTGAAAGAACATGGACTGTGA  | NM_020529:    | NM_020529:                               |
| 4794   | NFKBIE                                            | nuclear factor of kappa light polypeptide gene enhancer in B-cells inh  | -0.50  | CTGAGTGAGAAAGAGACTGAAA | NM_004556:    | NM_004556:                               |
| 4794   | NFKBIE                                            | nuclear factor of kappa light polypeptide gene enhancer in B-cells inh  | -0.69  | CTGGCTGTACATCTGGACCAA  | NM_004556:    | NM_004556:                               |
| 64332  | NFKBIZ                                            | nuclear factor of kappa light polypeptide gene enhancer in B-cells inh  | -0.16  | TCCGACGTATCCTGAAAGGAAA | NM_001005474: | NM_001005474.NM_031419:                  |
| 64332  | NFKBIZ                                            | nuclear factor of kappa light polypeptide gene enhancer in B-cells inh  | 1.00   | CACCTAAGCTTTGTAGATAAA  | NM_001005474: | NM_001005474.NM_031419:                  |
| 4799   | NFX1                                              | nuclear transcription factor, X-box binding 1                           | 0.70   | AACGGTTGTGTGGACGGCATA  | NM_002504:    | NM_147134.NM_147133.NM_002504:           |
| 4799   | NFX1                                              | nuclear transcription factor, X-box binding 1                           | -1.17  | CACACAGTCTCTGAATTTAA   | NM_002504:    | NM_147134.NM_147133.NM_002504:           |
| 4803   | NGFB                                              | nerve growth factor, beta polypeptide                                   | 3.04   | TAAGGACTGCATGGTAATTTA  | NM_002506:    | NM_002506:                               |
| 4803   | NGFB                                              | nerve growth factor, beta polypeptide                                   | 2.33   | TGCATGGTAATTTATAGTTTA  | NM_002506:    | NM_002506:                               |
| 4804   | NGFR                                              | nerve growth factor receptor (TNFR superfamily, member 16)              | 1.97   | AACGTTAAGTGATGAACATTA  | NM_002507:    | NM_002507:                               |
| 4804   | NGFR                                              | nerve growth factor receptor (TNFR superfamily, member 16)              | 0.99   | ACGTTAAGTGATGAACATTA   | NM_002507:    | NM_002507:                               |
| 27018  | NGFRAP1                                           | nerve growth factor receptor (TNFRSF16) associated protein 1            | -5.63  | ATGGCAATATCCACAGGAA    | NM_014380:    | NM_014380.NM_206915:                     |
| 27018  | NGFRAP1                                           | nerve growth factor receptor (TNFRSF16) associated protein 1            | -0.77  | CTGGAAAGAAATCCCGGGAAA  | NM_014380:    | NM_014380:                               |
| 374354 | NHLRC2                                            | NHL repeat containing 2                                                 | 1.17   | CTGACTATCACTGTAATTTAA  | NM_198514:    | NM_198514:                               |
| 374354 | NHLRC2                                            | NHL repeat containing 2                                                 | -0.84  | AACCAACAATTTCACTACAAA  | NM_198514:    | NM_198514:                               |
| 4811   | NID1                                              | nidogen 1                                                               | -0.30  | CCCGGGCAATCTGGCTATTAA  | NM_002508:    | NM_002508:                               |
| 4811   | NID1                                              | nidogen 1                                                               | 1.49   | ACGGGCGAACCTGCTATGATA  | NM_002508:    | NM_002508:                               |
| 22795  | NID2 (nidogen/nidogen 2 (osteonidogen))           |                                                                         | 0.34   | CACGTATAATGCTGCCAACAA  | NM_007361:    | NM_007361:                               |
| 22795  | NID2 (nidogen/nidogen 2 (osteonidogen))           |                                                                         | 0.74   | AAAGCACATGTGATCAATATA  | NM_007361:    | NM_007361:                               |
| 10430  | NIFIE14                                           | seven transmembrane domain protein                                      | 1.30   | AACAGTATTTGGAAAGTTAA   | NM_032635:    | NM_032635:                               |
| 10430  | NIFIE14                                           | seven transmembrane domain protein                                      | -0.32  | CCAGATGAGCATAGACTCCAA  | NM_032635:    | NM_032635:                               |
| 123606 | NIPA1                                             | non imprinted in Prader-Willi/Angelman syndrome 1                       | 1.35   | CCGATGATCTCTCTATAATA   | NM_144599:    | NM_144599:                               |
| 123606 | NIPA1                                             | non imprinted in Prader-Willi/Angelman syndrome 1                       | 1.04   | CTCGATCATGGTGTGAATT    | NM_144599:    | NM_144599:                               |
| 11188  | NISCH                                             | nischarin                                                               | -0.90  | CTCGTCTCGATGACGTGCAA   | NM_007184:    | NM_007184:                               |
| 11188  | NISCH                                             | nischarin                                                               | 0.55   | CACGCTCTCATTATCTCGGA   | NM_007184:    | NM_007184:                               |
| 85407  | NKD1 (naked naked cuticle homolog 1 (Drosophila)) |                                                                         | 0.23   | CACACACGTAATTTAAGGACTA | NM_033119:    | NM_033119:                               |
| 85407  | NKD1 (naked naked cuticle homolog 1 (Drosophila)) |                                                                         | 2.29   | CTCGAAATCTCCGAGAAGATA  | NM_033119:    | NM_033119:                               |
| 85409  | NKD2 (naked naked cuticle homolog 2 (Drosophila)) |                                                                         | -3.45  | CACGGAGCGCAAGAACCACTA  | NM_033120:    | NM_033120:                               |
| 85409  | NKD2 (naked naked cuticle homolog 2 (Drosophila)) |                                                                         | -0.31  | CAGCCTCATGCACACCATCTA  | NM_033120:    | NM_033120:                               |
| 4820   | NKTR                                              | natural killer-tumor recognition sequence                               | 0.30   | CACGCTTAAACCGTAGACCAA  | NM_005385:    | NM_005385.NM_001012651:                  |
| 4820   | NKTR                                              | natural killer-tumor recognition sequence                               | -0.83  | CAGGATTTGGCAGTAAGAGATA | NM_005385:    | NM_005385.NM_001012651:                  |

|        |            |                                                                               |       |                        |            |                                 |
|--------|------------|-------------------------------------------------------------------------------|-------|------------------------|------------|---------------------------------|
| 26257  | NKX2-8     | NK2 transcription factor related, locus 8 (Drosophila)                        | 0.01  | CTGGCGTTTGAATACCGAAA   | NM_014360: | NM_014360:                      |
| 26257  | NKX2-8     | NK2 transcription factor related, locus 8 (Drosophila)                        | -0.59 | TTCTCGTAGTTCGAGAATAA   | NM_014360: | NM_014360:                      |
| 4824   | NKX3-1     | NK3 transcription factor related, locus 1 (Drosophila)                        | -0.04 | CCGGAGTACTAGCCAGCACAA  | NM_006167: | NM_006167:                      |
| 4824   | NKX3-1     | NK3 transcription factor related, locus 1 (Drosophila)                        | -0.53 | AACTGTGTTTATTGCGCTATA  | NM_006167: | NM_006167:                      |
| 54475  | NLE1       | notchless homolog 1 (Drosophila)                                              | 0.53  | CCAGGTTCATGACCAAAATA   | NM_018096: | NM_001014445:NM_018096:         |
| 54475  | NLE1       | notchless homolog 1 (Drosophila)                                              | 0.07  | AAGGACAAATGCCTCCGGATA  | NM_018096: | NM_001014445:NM_018096:         |
| 22871  | NLGN1      | neuroligin 1                                                                  | 0.03  | AAGAACATGACTGTCTCAAAA  | NM_014932: | NM_014932:                      |
| 22871  | NLGN1      | neuroligin 1                                                                  | 0.25  | GAGGAATATTATGGAATATA   | NM_014932: | NM_014932:                      |
| 57555  | NLGN2      | neuroligin 2                                                                  | 0.88  | AAAGATGAAGAGAAATTGTA   | NM_020795: | NM_020795:                      |
| 57555  | NLGN2      | neuroligin 2                                                                  | -1.99 | CCCGACAATCCCTTATCCCTA  | NM_020795: | NM_020795:                      |
| 54413  | NLGN3      | neuroligin 3                                                                  | 0.49  | ATGGAGTTTGCCTTTGTAAA   | NM_018977: | NM_018977:                      |
| 54413  | NLGN3      | neuroligin 3                                                                  | 0.12  | ACGCAGATGAGTCCCTCGGTAA | NM_018977: | NM_018977:                      |
| 57502  | NLGN4X     | neuroligin 4, X-linked                                                        | 0.92  | ATGGCCGGACACATATGTATA  | NM_020742: | NM_020742:NM_181332:            |
| 57502  | NLGN4X     | neuroligin 4, X-linked                                                        | 0.65  | ACGGTGAATATTATAGAAGAA  | NM_020742: | NM_020742:NM_181332:            |
| 22829  | NLGN4Y     | neuroligin 4, Y-linked                                                        | 0.69  | AAGCAATCTCTATATATAAA   | NM_014893: | NM_014893:                      |
| 22829  | NLGN4Y     | neuroligin 4, Y-linked                                                        | -0.02 | TCACCAATAATAAATATTTAA  | NM_014893: | NM_014893:                      |
| 51701  | NLK        | nemo-like kinase                                                              | -0.82 | CCGGATAGACCTATTGGATAT  | NM_016231: | NM_016231:                      |
| 51701  | NLK        | nemo-like kinase                                                              | -0.36 | TTGGTGTGTCTGGTCAGTAA   | NM_016231: | NM_016231:                      |
| 57486  | NLN        | neurolysin (metallopeptidase M3 family)                                       | 0.37  | ACCCACTAGAAGTAATTGTA   | NM_020726: | NM_020726:                      |
| 57486  | NLN        | neurolysin (metallopeptidase M3 family)                                       | 0.12  | TTGGGACTTTCATTTGAACAA  | NM_020726: | NM_020726:                      |
|        | NM_001469  |                                                                               | -1.25 | GAGGGTTAGCGTTAGCCTTAA  | NM_001469  | No hits found till 3 mismatches |
|        | NM_003031: |                                                                               | 0.69  | TGGCATTGGAACACTATTCAA  | XM_058628: |                                 |
|        | NM_003616  |                                                                               | -1.79 | CCGCGCCTAAGGTCTCTATTA  | NM_003616  | No hits found till 3 mismatches |
|        | NM_004409  |                                                                               | 1.41  | GAGCCTGAGGGCTAAATTTAA  | NM_004409  | No hits found till 3 mismatches |
|        | NM_005468: |                                                                               | 0.56  | CTCCGGTGCCTTATATTTACA  | NM_005468: | XM_379409:                      |
|        | NM_012475  |                                                                               | -0.05 | TGGCCTAGATCTGAATCGAT   | NM_012475  | No hits found till 3 mismatches |
|        | NM_014627  |                                                                               | 0.88  | ATGATTATCCCACTATCCGAA  | NM_014627  | No hits found till 3 mismatches |
|        | NM_017886  |                                                                               | 0.11  | TTACCTGTTACTACATTAA    | NM_017886  | No hits found till 3 mismatches |
|        | NM_030757: |                                                                               | -0.40 | ACCCGATGCACCTAGTCTGTA  | NM_030757: | XM_295270:                      |
|        | NM_030906  |                                                                               | 0.00  | CAGGATGGTAATAGGTTAAGA  | NM_030906  | No hits found till 3 mismatches |
|        | NM_183379: |                                                                               | -2.07 | CAGGTGAATTAACCTGTTTGA  | NM_183379: | NM_183379:                      |
|        | NM_183379: |                                                                               | 0.06  | ACAGGTCACCATCTAAACAA   | NM_183379: | NM_183379:                      |
| 4829   | NMBR       | (neuro) neuromedin B receptor                                                 | -1.36 | AGGGACATCGATTAAACCTAA  | NM_002511: | NM_002511:                      |
| 4829   | NMBR       | (neuro) neuromedin B receptor                                                 | 0.76  | CCCGCGGACAGTAACTTGC    | NM_002511: | NM_002511:                      |
| 4830   | NME1       | non-metastatic cells 1, protein (NM23A) expressed in                          | -0.32 | CAAGTTGGCGAAGCAATTATA  | NM_000269: | NM_198175:NM_000269:            |
| 4830   | NME1       | non-metastatic cells 1, protein (NM23A) expressed in                          | 1.77  | TAGGATTCATTGAGTTGGTAA  | NM_000269: | NM_198175:NM_000269:            |
| 4832   | NME3       | non-metastatic cells 3, protein expressed in                                  | -2.83 | ACGCACCTCTCCGGCCGTGAA  | NM_002513: | NM_002513:                      |
| 4832   | NME3       | non-metastatic cells 3, protein expressed in                                  | -6.69 | CTGCATCGAGGTTGGCAAGAA  | NM_002513: | NM_002513:                      |
| 4833   | NME4       | non-metastatic cells 4, protein expressed in                                  | -1.78 | ACCAACTACCTCCGTCAGCAA  | NM_005009: | NM_005009:                      |
| 4833   | NME4       | non-metastatic cells 4, protein expressed in                                  | 0.84  | CAGCACATGGGTGGTACACTA  | NM_005009: | NM_005009:                      |
| 8382   | NME5       | non-metastatic cells 5, protein expressed in (nucleoside-diphosphate )        | -0.83 | ATGATATTAGCTAGACATAAA  | NM_003551: | NM_003551:                      |
| 8382   | NME5       | non-metastatic cells 5, protein expressed in (nucleoside-diphosphate )        | 0.02  | CATGATATTAGCTAGACATAA  | NM_003551: | NM_003551:                      |
| 10201  | NME6       | non-metastatic cells 6, protein expressed in (nucleoside-diphosphate )        | -0.34 | CAGACTTCTCTAGACACTCTA  | NM_005793: | NM_005793:                      |
| 10201  | NME6       | non-metastatic cells 6, protein expressed in (nucleoside-diphosphate )        | 0.91  | CAGGATCTAGCCTCTATCTA   | NM_005793: | NM_005793:                      |
| 29922  | NME7       | (non-m non-metastatic cells 7, protein expressed in (nucleoside-diphosphate ) | -2.93 | CCCGCGATTTACGCCCTGGAA  | NM_013330: | NM_013330:NM_197972:            |
| 29922  | NME7       | (non-m non-metastatic cells 7, protein expressed in (nucleoside-diphosphate ) | -0.03 | TTATGTAGATCACCAGTCAA   | NM_013330: | NM_013330:NM_197972:            |
| 9111   | NMI        | (N-myc (i N-myc (and STAT) interactor                                         | 0.00  | ACCCGGATTAAGTAAATGTT   | NM_004688: | NM_004688:                      |
| 9111   | NMI        | (N-myc (i N-myc (and STAT) interactor                                         | 0.82  | TACCCTCTTTTATAAACTCAA  | NM_004688: | NM_004688:                      |
| 4836   | NMT1       | N-myristoyltransferase 1                                                      | 0.30  | ATGGAGTTAACGGGTGAATAA  | NM_021079: | NM_021079:                      |
| 4836   | NMT1       | N-myristoyltransferase 1                                                      | -1.00 | CACGTGAGAATCCCTGGCAAAA | NM_021079: | NM_021079:                      |
| 9397   | NMT2       | (N-myr N-myristoyltransferase 2                                               | 0.12  | CAGGGCATTGATAGTTGTAAT  | NM_004808: | NM_004808:                      |
| 9397   | NMT2       | (N-myr N-myristoyltransferase 2                                               | -0.70 | TAGAAGTTACAGAGTCATGTA  | NM_004808: | NM_004808:                      |
| 10874  | NMU        | (neuror) neuromedin U                                                         | -0.90 | GAGCAATGCTAGGAATACAA   | NM_006681: | NM_006681:                      |
| 10874  | NMU        | (neuror) neuromedin U                                                         | -1.32 | CAGAGTGGACGAAGAATTCCA  | NM_006681: | NM_006681:                      |
| 10316  | NMUR1      | neuromedin U receptor 1                                                       | 1.10  | ACCATCAAGCATACAGTCTA   | NM_006056: | NM_006056:                      |
| 10316  | NMUR1      | neuromedin U receptor 1                                                       | 0.52  | CTGCCTGGCCCTCAGTGCTCAA | NM_006056: | NM_006056:                      |
| 56923  | NMUR2      | neuromedin U receptor 2                                                       | 0.54  | CGCAATAAAGTATTATTAT    | NM_020167: | NM_020167:                      |
| 56923  | NMUR2      | neuromedin U receptor 2                                                       | 0.30  | TGCAATAAAGTATTATTAT    | NM_020167: | NM_020167:                      |
| 197358 | NOD3       | NOD3 protein                                                                  | 0.01  | CAGGATGATCTCAGAGGCCAT  | NM_178844: | NM_178844:                      |
| 197358 | NOD3       | NOD3 protein                                                                  | 0.03  | CTCCGGAGACTCAATCTTCAA  | NM_178844: | NM_178844:                      |
| 4838   | NODAL      | nodal homolog (mouse)                                                         | -0.87 | AAGGATCACTGATATGATTAA  | NM_018055: | NM_018055:                      |
| 4838   | NODAL      | nodal homolog (mouse)                                                         | 1.20  | AAGTTAAGGATCAGTGTATA   | NM_018055: | NM_018055:                      |
| 9241   | NOG        | noggin                                                                        | 1.94  | AAGGTCAGTATTATACGTTAA  | NM_005450: | NM_005450:                      |
| 9241   | NOG        | noggin                                                                        | 0.43  | TTCTGTAATGCACGTGTTAA   | NM_005450: | NM_005450:                      |
| 65083  | NOL6       | nucleolar protein family 6 (RNA-associated)                                   | -1.98 | CAGGAGATCCATCCACCTATT  | NM_022917: | NM_022917:NM_139235:            |
| 65083  | NOL6       | nucleolar protein family 6 (RNA-associated)                                   | -0.26 | CGCCGCCCTTGGACATTTTA   | NM_022917: | NM_022917:                      |
| 4841   | NONO       | non-POU domain containing, octamer-binding                                    | -0.08 | CCAAAGTGACCGCAACATCAA  | NM_007363: | NM_007363:                      |
| 4841   | NONO       | non-POU domain containing, octamer-binding                                    | -3.33 | CTGTTTGTATTGCTCTCAT    | NM_007363: | NM_007363:                      |
| 4842   | NOS1       | nitric oxide synthase 1 (neuronal)                                            | -1.83 | CAGGAATAGTTCACATCTAT   | NM_000620: | NM_000620:                      |
| 4842   | NOS1       | nitric oxide synthase 1 (neuronal)                                            | 1.62  | CAGCGGCAATTTGATATCCAA  | NM_000620: | NM_000620:                      |
| 4843   | NOS2A      | nitric oxide synthase 2A (inducible, hepatocytes)                             | -0.54 | ATCGAATTTGTCAACCAATAT  | NM_000625: | NM_153292:NM_000625:            |
| 4843   | NOS2A      | nitric oxide synthase 2A (inducible, hepatocytes)                             | -2.55 | CTGGCCGTCGCAACCTTCAA   | NM_000625: | NM_153292:NM_000625:            |
| 4846   | NOS3       | nitric oxide synthase 3 (endothelial cell)                                    | 1.03  | CAGGAAGAAGACCTTAAAGA   | M95296:    | NM_000603:                      |
| 4846   | NOS3       | nitric oxide synthase 3 (endothelial cell)                                    | 0.24  | CCGGGACTTCATCAACCAGTA  | M95296:    | NM_000603:                      |
| 4851   | NOTCH1     | Notch homolog 1, translocation-associated (Drosophila)                        | -0.05 | GCGGATTAATTTGCATCTGAA  | NM_017617: | NM_017617:                      |
| 4851   | NOTCH1     | Notch homolog 1, translocation-associated (Drosophila)                        | 1.49  | CGGCATGTGCGCAACCAATA   | NM_017617: | NM_017617:                      |
| 4853   | NOTCH2     | Notch homolog 2 (Drosophila)                                                  | 0.37  | CTGACTAAGCAGTATGAGGAA  | NM_024408: | NM_024408:                      |
| 4853   | NOTCH2     | Notch homolog 2 (Drosophila)                                                  | -1.21 | AAGGAAGGTAAGATGGATAA   | NM_024408: | NM_024408:                      |
| 4854   | NOTCH3     | Notch homolog 3 (Drosophila)                                                  | 0.21  | AAGGAATAGTTAACACTCAAA  | NM_000435: | NM_000435:                      |
| 4854   | NOTCH3     | Notch homolog 3 (Drosophila)                                                  | -2.16 | CACCTGACATGATGAATTA    | NM_000435: | NM_000435:                      |
| 4855   | NOTCH4     | Notch homolog 4 (Drosophila)                                                  | -0.42 | TCGCTATTAAAGACCCTAAA   | NM_004557: | NM_004557:                      |
| 4855   | NOTCH4     | Notch homolog 4 (Drosophila)                                                  | -4.21 | CAGATATGTAAGACCAGAAA   | NM_004557: | NM_004557:                      |
| 27035  | NOX1       | NADPH oxidase 1                                                               | -1.33 | TCCAGTGTGAACAGCAATTTA  | NM_007052: | NM_007052:NM_013954:            |
| 27035  | NOX1       | NADPH oxidase 1                                                               | -0.40 | CAGGTTTGAGCAGTCACTTTA  | NM_007052: | NM_007052:NM_013954:            |
| 50507  | NOX4       | NADPH oxidase 4                                                               | 1.35  | TCCATTGTCATCAACTCTCAA  | NM_016931: | NM_016931:                      |
| 50507  | NOX4       | NADPH oxidase 4                                                               | -1.26 | AACCAGGAGATTGTTGGATAA  | NM_016931: | NM_016931:                      |
| 4860   | NP         | nucleoside phosphorylase                                                      | 0.09  | TAGTTGTAGCAGAAAGGAAA   | NM_000270: | NM_000270:                      |
| 4860   | NP         | nucleoside phosphorylase                                                      | -0.95 | AAGGTCATCATGATTATGAA   | NM_000270: | NM_000270:                      |
| 4861   | NPAS1      | neuronal PAS domain protein 1                                                 | 0.46  | GCCCGTAGCCCTGAGAATTTAA | NM_002517: | NM_002517:                      |
| 4861   | NPAS1      | neuronal PAS domain protein 1                                                 | -7.13 | CAGCGTCTTCGACTACATCA   | NM_002517: | NM_002517:                      |
| 4862   | NPAS2      | neuronal PAS domain protein 2                                                 | 0.29  | TGGGACACAACTCAGCTTTAA  | NM_002518: | NM_002518:                      |
| 4862   | NPAS2      | neuronal PAS domain protein 2                                                 | -1.28 | CAGGACGGGACGGCAAGTCAA  | NM_002518: | NM_002518:                      |
| 64067  | NPAS3      | neuronal PAS domain protein 3                                                 | -1.37 | ACCCATCAATTTGACAAATGA  | NM_022123: | NM_022123:NM_173159:            |
| 64067  | NPAS3      | neuronal PAS domain protein 3                                                 | 0.64  | CGCGTGTGACAAACGACATGAA | NM_022123: | NM_022123:NM_173159:            |
| 266743 | NPAS4      | neuronal PAS domain protein 4                                                 | 0.70  | TTGAATAAGTCTGTGACTTTAA | NM_178864: | NM_178864:                      |
| 266743 | NPAS4      | neuronal PAS domain protein 4                                                 | -5.59 | ACCCATTACTGCCAATAACTA  | NM_178864: | NM_178864:                      |
| 2831   | NPBWR1     | neuropeptides B/W receptor 1                                                  | -1.11 | CACGCTGTGTGCTGCCATCAA  | NM_005285: | NM_005285:                      |
| 2831   | NPBWR1     | neuropeptides B/W receptor 1                                                  | -0.80 | CCGATGAAGACCGTCAACAA   | NM_005285: | NM_005285:                      |
| 2832   | NPBWR2     | neuropeptides B/W receptor 2                                                  | -0.04 | GACCAACGTGTTCTATCCTGAA | NM_005286: | NM_005286:                      |

|        |                                                               |                                                                          |                       |                        |            |                                                                                             |
|--------|---------------------------------------------------------------|--------------------------------------------------------------------------|-----------------------|------------------------|------------|---------------------------------------------------------------------------------------------|
| 2832   | NPBWR2                                                        | neuropeptides B/W receptor 2                                             | 0.49                  | GCGCTCATCCTTGTAATCCTA  | NM_005286: | NM_005286:                                                                                  |
| 4864   | NP1                                                           | Niemann-Pick disease, type C1                                            | -0.40                 | CCAGTTAGATGGGGCATGAAA  | NM_000271: | NM_000271:                                                                                  |
| 4864   | NP1                                                           | Niemann-Pick disease, type C1                                            | 1.09                  | CTGACAACTATCCCGAATA    | NM_000271: | NM_000271:                                                                                  |
| 29881  | NPCL1L1 (NP(NPC1 (Niemann-Pick disease, type C1, gene)-like 1 | -2.60                                                                    | CCGAGTATGGTGGACTCCAA  | NM_013389:             | NM_013389: |                                                                                             |
| 29881  | NPCL1L1 (NP(NPC1 (Niemann-Pick disease, type C1, gene)-like 1 | -6.33                                                                    | AAGCCTCATGACACTCTCCAA | NM_013389:             | NM_013389: |                                                                                             |
| 10577  | NP2                                                           | Niemann-Pick disease, type C2                                            | 0.45                  | CAGATCGTTTCTCATCTCTAA  | NM_006432: | NM_006432:                                                                                  |
| 10577  | NP2                                                           | Niemann-Pick disease, type C2                                            | -5.28                 | AAGGACAGTCTTACAGCGTCA  | NM_006432: | NM_006432:                                                                                  |
| 79716  | NPEPL1                                                        | aminopeptidase-like 1                                                    | -0.17                 | CAGAATTCACCTGAGGTTCAA  | NM_024663: | NM_024663:                                                                                  |
| 79716  | NPEPL1                                                        | aminopeptidase-like 1                                                    | -0.23                 | CTGATTTATAGGCAAGAGAAA  | NM_024663: | NM_024663:                                                                                  |
| 9520   | NPEPPS                                                        | aminopeptidase puromycin sensitive                                       | -0.10                 | CTGGGAATGGTTAAACACAAA  | NM_006310: | NM_006310:                                                                                  |
| 9520   | NPEPPS                                                        | aminopeptidase puromycin sensitive                                       | 0.28                  | GAGGATTTGGCAGTTGATAAA  | NM_006310: | NM_006310:                                                                                  |
| 8620   | NPFF                                                          | neuropeptide FF-amide peptide precursor                                  | -1.90                 | CAGGATTCCTGGAGGAATGAA  | NM_003717: | NM_003717:                                                                                  |
| 8620   | NPFF                                                          | neuropeptide FF-amide peptide precursor                                  | -0.56                 | CCCAGAGGTTTGGCAGAAATA  | NM_003717: | NM_003717:                                                                                  |
| 64106  | NPFFR1                                                        | neuropeptide FF receptor 1                                               | -4.82                 | CTGGTGGCCATTGCTGTGGAA  | NM_022146: | NM_022146:                                                                                  |
| 64106  | NPFFR1                                                        | neuropeptide FF receptor 1                                               | -2.06                 | CTGTTTCATCGTCTCAAGAA   | NM_022146: | NM_022146:                                                                                  |
| 10886  | NPFFR2                                                        | neuropeptide FF receptor 2                                               | 1.13                  | CCGGGAAGACTGGCCAAATCA  | NM_004885: | NM_004885:NM_053036:                                                                        |
| 10886  | NPFFR2                                                        | neuropeptide FF receptor 2                                               | -0.63                 | CTGGCCATAAGTATTACTA    | NM_004885: | NM_004885:NM_053036:                                                                        |
| 4867   | NPHP1                                                         | nephronophthisis 1 (juvenile)                                            | -0.06                 | CAGTAAAGATACCATTGTATA  | NM_000272: | NM_000272:                                                                                  |
| 4867   | NPHP1                                                         | nephronophthisis 1 (juvenile)                                            | 0.04                  | CTCCACGATTACGTGAATAAA  | NM_000272: | NM_000272:                                                                                  |
| 4868   | NPHS1                                                         | nephrosis 1, congenital, Finnish type (nephri)                           | 0.68                  | CTGGTTAGGTGAGCTCCATAA  | NM_004646: | NM_004646:                                                                                  |
| 4868   | NPHS1                                                         | nephrosis 1, congenital, Finnish type (nephri)                           | 0.95                  | TGGGCAAAACCAACATCTAAA  | NM_004646: | NM_004646:                                                                                  |
| 4869   | NPM1                                                          | nucleophosmin (nucleolar phosphoprotein B23, numatrin)                   | 0.42                  | CCGACAAAGATTACCTTTA    | NM_002520: | NM_002520:NM_001037738:NM_199185:                                                           |
| 4869   | NPM1                                                          | nucleophosmin (nucleolar phosphoprotein B23, numatrin)                   | 0.42                  | TACGAAGGCAGTCCAAATAAA  | NM_002520: | NM_002520:NM_001037738:NM_199185:                                                           |
| 255743 | NPNT                                                          | nephroectin                                                              | -1.17                 | CTGGTTAGACTAGAGTATAA   | NM_198278: | NM_003717:                                                                                  |
| 255743 | NPNT                                                          | nephroectin                                                              | -0.77                 | CTCATGTATATTGGAGGCAAA  | NM_198278: | NM_001033047:                                                                               |
| 4879   | NPPB                                                          | natriuretic peptide precursor B                                          | -0.49                 | TCCACGGTGAATAAAGTCAA   | NM_002521: | NM_002521:                                                                                  |
| 4879   | NPPB                                                          | natriuretic peptide precursor B                                          | 0.06                  | AAGATGGTTCTTACCCTTGA   | NM_002521: | NM_002521:                                                                                  |
| 4881   | NPR1                                                          | natriuretic peptide receptor A/guanylate cyclase A (atrionatriuretic pep | -3.83                 | AACGCATTAGCTGACACGAA   | NM_000906: | NM_000906:                                                                                  |
| 4881   | NPR1                                                          | natriuretic peptide receptor A/guanylate cyclase A (atrionatriuretic pep | -0.04                 | ACGCATTAGCTGACACGAAA   | NM_000906: | NM_000906:                                                                                  |
| 4882   | NPR2                                                          | natriuretic peptide receptor B/guanylate cyclase B (atrionatriuretic pep | -2.74                 | AAGGATCCCTAGATGAGCTA   | NM_000907: | NM_003995:NM_000907:                                                                        |
| 4882   | NPR2                                                          | natriuretic peptide receptor B/guanylate cyclase B (atrionatriuretic pep | 0.04                  | CAGGACAAATCCGACCCGGGAA | NM_000907: | NM_003995:NM_000907:                                                                        |
| 4883   | NPR3                                                          | natriuretic peptide receptor C/guanylate cyclase C (atrionatriuretic pep | -5.51                 | CCGAATTGATAGCATACAAA   | NM_000908: | NM_000908:                                                                                  |
| 4883   | NPR3                                                          | natriuretic peptide receptor C/guanylate cyclase C (atrionatriuretic pep | 0.42                  | GAGGATTACGTTAACATGTTT  | NM_000908: | NM_000908:                                                                                  |
| 27020  | NPTN                                                          | neuroplastin                                                             | -0.60                 | CAGGATATACAGCATATAAA   | NM_012428: | NM_017455:NM_012428:                                                                        |
| 27020  | NPTN                                                          | neuroplastin                                                             | -0.78                 | CTGGTACATAAAGATGAGTAA  | NM_012428: | NM_017455:NM_012428:                                                                        |
| 23467  | NPTXR                                                         | neuronal pentraxin receptor                                              | -0.39                 | AAGAGAGTGCAGAACTTAA    | NM_014293: | NM_014293:NM_058178:                                                                        |
| 23467  | NPTXR                                                         | neuronal pentraxin receptor                                              | -0.61                 | AACCTCATGCTGAGATTGTA   | NM_014293: | NM_014293:NM_058178:                                                                        |
| 4852   | NPY                                                           | neuropeptide Y                                                           | -2.88                 | CAGCCCATATTTTCATCGTGA  | NM_000905: | NM_000905:                                                                                  |
| 4852   | NPY                                                           | neuropeptide Y                                                           | 0.96                  | CTGCAATGTGGTATGGGAAA   | NM_000905: | NM_000905:                                                                                  |
| 4886   | NPY1R                                                         | neuropeptide Y receptor Y1                                               | -3.14                 | ACGACATCAGCTGATAATCAA  | NM_000909: | NM_000909:                                                                                  |
| 4886   | NPY1R                                                         | neuropeptide Y receptor Y1                                               | -0.34                 | TCCCACTGATTGTCACCTTAA  | NM_000909: | NM_000909:                                                                                  |
| 4887   | NPY2R (neum neuropeptide Y receptor Y2                        |                                                                          | -8.06                 | CCGGGAGTATCGCTGATTGA   | NM_000910: | NM_000910:                                                                                  |
| 4887   | NPY2R (neum neuropeptide Y receptor Y2                        |                                                                          | 0.01                  | TAGAATCCAATTAATGATTCA  | NM_000910: | NM_000910:                                                                                  |
| 4889   | NPY5R                                                         | neuropeptide Y receptor Y5                                               | 0.08                  | CACAGCTTGTGGAACCTCAA   | NM_006174: | NM_006174:                                                                                  |
| 4889   | NPY5R                                                         | neuropeptide Y receptor Y5                                               | 1.31                  | TTGGGCTCTATACATTTGTA   | NM_006174: | NM_006174:                                                                                  |
| 1728   | NQO1                                                          | NAD(P)H dehydrogenase, quinone 1                                         | 0.75                  | AAGATCTAATAAATAAATA    | NM_000903: | NM_000903:NM_001025433:NM_001025434:                                                        |
| 1728   | NQO1                                                          | NAD(P)H dehydrogenase, quinone 1                                         | 1.59                  | TCCACTGTTGGTATTATATA   | NM_000903: | NM_000903:NM_001025433:NM_001025434:                                                        |
| 190    | NR0B1                                                         | nuclear receptor subfamily 0, group B, member 1                          | -1.45                 | ATGCTCTGCAAAAGATATAA   | NM_000475: | NM_000475:                                                                                  |
| 190    | NR0B1                                                         | nuclear receptor subfamily 0, group B, member 1                          | -2.81                 | ATGGATGATATGATGCTGGAA  | NM_000475: | NM_000475:                                                                                  |
| 8431   | NR0B2                                                         | nuclear receptor subfamily 0, group B, member 2                          | 0.97                  | AAGGAATATGCTGCTGAAA    | NM_021969: | NM_021969:                                                                                  |
| 8431   | NR0B2                                                         | nuclear receptor subfamily 0, group B, member 2                          | 0.14                  | TCCTATCGACTTTATACAGAA  | NM_021969: | NM_021969:                                                                                  |
| 9572   | NR1D1                                                         | nuclear receptor subfamily 1, group D, member 1                          | -0.03                 | CAGCGTCATAACGAGGCCCTA  | NM_021724: | NM_021724:                                                                                  |
| 9572   | NR1D1                                                         | nuclear receptor subfamily 1, group D, member 1                          | -1.18                 | TGGCATGGTGTACTGTGTAA   | NM_021724: | NM_021724:                                                                                  |
| 9975   | NR1D2                                                         | nuclear receptor subfamily 1, group D, member 2                          | -0.48                 | CAGCATCTGTTTATGGTATTA  | NM_005126: | NM_005126:                                                                                  |
| 9975   | NR1D2                                                         | nuclear receptor subfamily 1, group D, member 2                          | 0.76                  | TACACACCTATTCAAGTTTAA  | NM_005126: | NM_005126:                                                                                  |
| 7376   | NR1H2                                                         | nuclear receptor subfamily 1, group H, member 2                          | -3.98                 | CTGGCGGAGCTGTAGACCTA   | NM_007121: | NM_007121:                                                                                  |
| 7376   | NR1H2                                                         | nuclear receptor subfamily 1, group H, member 2                          | -0.35                 | ATCGTGGACTTCTGCTAAGCAA | NM_007121: | NM_007121:                                                                                  |
| 10062  | NR1H3                                                         | nuclear receptor subfamily 1, group H, member 3                          | 0.28                  | CATGAATGAGCTGCAACTCAA  | NM_005693: | NM_005693:                                                                                  |
| 10062  | NR1H3                                                         | nuclear receptor subfamily 1, group H, member 3                          | 0.77                  | GAGATAGTTGACTTTGCTGAAA | NM_005693: | NM_005693:                                                                                  |
| 9971   | NR1H4                                                         | nuclear receptor subfamily 1, group H, member 4                          | 2.41                  | CTCATATTAATCTGATGTATA  | NM_005123: | NM_005123:                                                                                  |
| 9971   | NR1H4                                                         | nuclear receptor subfamily 1, group H, member 4                          | 0.85                  | TCCAGATAGACAATACATAAA  | NM_005123: | NM_005123:                                                                                  |
| 8856   | NR1I2                                                         | nuclear receptor subfamily 1, group I, member 2                          | 0.33                  | CAGGAGGGCCATGAAACGCAA  | NM_003889: | NM_003013:NM_003889:NM_022002:                                                              |
| 8856   | NR1I2                                                         | nuclear receptor subfamily 1, group I, member 2                          | -0.29                 | AACCTGGAGGTGAGACCCAAA  | NM_003889: | NM_003013:NM_003889:NM_022002:                                                              |
| 9970   | NR1I3                                                         | nuclear receptor subfamily 1, group I, member 3                          | 1.01                  | AACACTTTCATGGTACTGCAA  | NM_005122: | NM_005122:                                                                                  |
| 9970   | NR1I3                                                         | nuclear receptor subfamily 1, group I, member 3                          | -1.83                 | CACACACTCTCGCAGACATCAA | NM_005122: | NM_005122:                                                                                  |
| 7181   | NR2C1                                                         | nuclear receptor subfamily 2, group C, member 1                          | -0.14                 | TGGCGAGGCAGGAAATATA    | NM_003297: | NM_003297:                                                                                  |
| 7181   | NR2C1                                                         | nuclear receptor subfamily 2, group C, member 1                          | -1.66                 | CCTGCAGATTTAATCCTGCAA  | NM_003297: | NM_003297:                                                                                  |
| 7182   | NR2C2                                                         | nuclear receptor subfamily 2, group C, member 2                          | -0.69                 | TACCTTAGCTAAAGCACTTAA  | NM_003298: | NM_003298:                                                                                  |
| 7182   | NR2C2                                                         | nuclear receptor subfamily 2, group C, member 2                          | 0.11                  | TCCAGACAAATAGCAATTTAA  | NM_003298: | NM_003298:                                                                                  |
| 7101   | NR2E1                                                         | nuclear receptor subfamily 2, group E, member 1                          | -2.71                 | CTCTATACCTTATGGAATGTA  | NM_003269: | NM_003269:                                                                                  |
| 7101   | NR2E1                                                         | nuclear receptor subfamily 2, group E, member 1                          | -0.41                 | TCGCGTTAACATAGTGGCTGAA | NM_003269: | NM_003269:                                                                                  |
| 10002  | NR2E3                                                         | nuclear receptor subfamily 2, group E, member 3                          | 1.77                  | CACAATGTATTACATCGTAA   | NM_014249: | NM_014249:                                                                                  |
| 10002  | NR2E3                                                         | nuclear receptor subfamily 2, group E, member 3                          | -2.67                 | CACGGAGTTGGCTGCATGAA   | NM_014249: | NM_016346:NM_014249:                                                                        |
| 7025   | NR2F1                                                         | nuclear receptor subfamily 2, group F, member 1                          | 0.59                  | TCCGAGGAACCTTAACCTTACA | NM_005654: | NM_005654:                                                                                  |
| 7025   | NR2F1                                                         | nuclear receptor subfamily 2, group F, member 1                          | -9.67                 | CCGGCGTGAATATCCCGTAT   | NM_005654: | NM_005654:                                                                                  |
| 7026   | NR2F2                                                         | nuclear receptor subfamily 2, group F, member 2                          | -0.81                 | CCGCTTAGTCTTGAATTTGTA  | NM_021005: | NM_021005:                                                                                  |
| 7026   | NR2F2                                                         | nuclear receptor subfamily 2, group F, member 2                          | 0.03                  | GTGGAATTTATGGCAGCCAA   | NM_021005: | NM_021005:                                                                                  |
| 2063   | NR2F6                                                         | nuclear receptor subfamily 2, group F, member 6                          | -0.37                 | AAGGCAATAATAAAGACATT   | NM_005234: | NM_005234:                                                                                  |
| 2063   | NR2F6                                                         | nuclear receptor subfamily 2, group F, member 6                          | -0.02                 | ATGACTCAAGGCCAATAATAA  | NM_005234: | NM_005234:                                                                                  |
|        |                                                               |                                                                          |                       |                        |            | NM_001018076:NM_001018074:NM_001018075:NM_001018076:NM_001018077:NM_001020825:NM_001024094: |
| 2908   | NR3C1                                                         | nuclear receptor subfamily 3, group C, member 1 (glucocorticoid recej    | -0.50                 | AAGGACGGTCTGAAGGCCAA   | NM_000176: | NM_001018076:NM_001018074:NM_001018075:NM_001018076:NM_001018077:NM_001020825:NM_001024094: |
|        |                                                               |                                                                          |                       |                        |            | NM_001018076:NM_001018074:NM_001018075:NM_001018076:NM_001018077:NM_001020825:NM_001024094: |
| 2908   | NR3C1                                                         | nuclear receptor subfamily 3, group C, member 1 (glucocorticoid recej    | 0.76                  | GAGGATCATGACTACGCTCAA  | NM_000176: | NM_000901:                                                                                  |
| 4306   | NR3C2                                                         | nuclear receptor subfamily 3, group C, member 2                          | -1.09                 | CAACATTACCTGTCTTTCAA   | NM_000901: | NM_000901:                                                                                  |
| 4306   | NR3C2                                                         | nuclear receptor subfamily 3, group C, member 2                          | -0.27                 | CAGCAATTAATAGATCAACA   | NM_000901: | NM_000901:                                                                                  |
| 3164   | NR4A1                                                         | nuclear receptor subfamily 4, group A, member 1                          | 1.13                  | CTGATTAATATATTAAATATA  | NM_002135: | NM_002135:NM_173157:                                                                        |
| 3164   | NR4A1                                                         | nuclear receptor subfamily 4, group A, member 1                          | 0.73                  | CTCCTTCCACATGTACATAAA  | NM_002135: | NM_002135:NM_173157:                                                                        |
| 4929   | NR4A2                                                         | nuclear receptor subfamily 4, group A, member 2                          | 0.23                  | CAGACACTATGATGCTGTGTA  | NM_006186: | NM_173172:NM_173171:NM_173173:NM_006186:                                                    |
| 4929   | NR4A2                                                         | nuclear receptor subfamily 4, group A, member 2                          | -2.02                 | CTGGATTTAGAACATGGACTA  | NM_006186: | NM_173172:NM_173171:NM_173173:NM_006186:                                                    |
| 8013   | NR4A3                                                         | nuclear receptor subfamily 4, group A, member 3                          | 1.89                  | AAGAGTCATTCTAATATTGTA  | NM_006981: | NM_173200:NM_006981:NM_173198:                                                              |
| 8013   | NR4A3                                                         | nuclear receptor subfamily 4, group A, member 3                          | -0.08                 | ATGGCTGTTTGTCTCCATAAA  | NM_006981: | NM_173200:NM_006981:NM_173198:                                                              |
| 2516   | NR5A1                                                         | nuclear receptor subfamily 5, group A, member 1                          | 1.33                  | CTGGAATAAATTTCCGAATTA  | NM_004959: | NM_004959:                                                                                  |
| 2516   | NR5A1                                                         | nuclear receptor subfamily 5, group A, member 1                          | 0.36                  | AAGGATAACCGAGTTTGCTAA  | NM_004959: | NM_004959:                                                                                  |
| 2494   | NR5A2                                                         | nuclear receptor subfamily 5, group A, member 2                          | -1.26                 | ACGACAGGAGCTGATAAGCAA  | NM_003822: | NM_205860:NM_003822:                                                                        |
| 2494   | NR5A2                                                         | nuclear receptor subfamily 5, group A, member 2                          | -0.09                 | ACGCATGTTAATCTATGCAAAA | NM_003822: | NM_205860:NM_003822:                                                                        |

|        |        |                                                                 |        |                        |               |                                                                                                                                                                                                     |
|--------|--------|-----------------------------------------------------------------|--------|------------------------|---------------|-----------------------------------------------------------------------------------------------------------------------------------------------------------------------------------------------------|
| 2649   | NR6A1  | nuclear receptor subfamily 6, group A, member 1                 | 0.04   | AAGCGGAGCATTGCAACAAA   | NM_001489:    | NM_033334:NM_001489:NM_033335:                                                                                                                                                                      |
| 2649   | NR6A1  | nuclear receptor subfamily 6, group A, member 1                 | 0.38   | GAGGAGATGCTTGCATGAAA   | NM_001489:    | NM_033334:NM_001489:NM_033335:                                                                                                                                                                      |
| 4893   | NRAS   | neuroblastoma RAS viral (v-ras) oncogene homolog                | -0.23  | AACCGCAAACGCTGAAATCTA  | NM_002524:    | NM_002524:                                                                                                                                                                                          |
| 4893   | NRAS   | neuroblastoma RAS viral (v-ras) oncogene homolog                | 0.18   | CTGAGATACGCTGTGACTTA   | NM_002524:    | NM_002524:                                                                                                                                                                                          |
| 29982  | NRBF2  | nuclear receptor binding factor 2                               | 1.47   | CAAAGGGATAGCCATATGAAA  | NM_030759:    | NM_030759:                                                                                                                                                                                          |
| 29982  | NRBF2  | nuclear receptor binding factor 2                               | -0.23  | CACACTTTGCACTACTATAA   | NM_030759:    | NM_030759:                                                                                                                                                                                          |
| 29959  | NRBP1  | nuclear receptor binding protein 1                              | 0.39   | CGGTTGACTTCTCTGCTAGA   | NM_013392:    | NM_013392:                                                                                                                                                                                          |
| 29959  | NRBP1  | nuclear receptor binding protein 1                              | -11.72 | TGGTGAGGAGGGAGTCAAA    | NM_013392:    | NM_013392:                                                                                                                                                                                          |
| 340371 | NRBP2  | nuclear receptor binding protein 2                              | 1.12   | ATCTTAAATATCCAATACTA   | NM_178564:    | NM_178564:                                                                                                                                                                                          |
| 340371 | NRBP2  | nuclear receptor binding protein 2                              | 1.98   | AACGCATACAAATAAATTA    | NM_178564:    | NM_178564:                                                                                                                                                                                          |
| 4897   | NRCAM  | neuronal cell adhesion molecule                                 | -0.48  | AGGGTGTAAATATCCAGTTA   | NM_005010:    | NM_005010:NM_001037132:                                                                                                                                                                             |
| 4897   | NRCAM  | neuronal cell adhesion molecule                                 | 0.35   | CAGGCCTCAGTACAAGTTA    | NM_005010:    | NM_005010:NM_001037132:                                                                                                                                                                             |
| 4898   | NRD1   | nardilyysin (N-arginine dibasic convertase)                     | -1.61  | AAGGCTTTCGATTGCCGGAAA  | NM_002525:    | NM_002525:                                                                                                                                                                                          |
| 4898   | NRD1   | nardilyysin (N-arginine dibasic convertase)                     | -6.91  | CAGGGTGAAGCCACTTATTA   | NM_002525:    | NM_002525:                                                                                                                                                                                          |
| 3084   | NRG1   | neuregulin 1                                                    | 0.53   | TCGAGATACTGTGCAAGTAA   | NM_004495:    | NM_004495:                                                                                                                                                                                          |
| 3084   | NRG1   | neuregulin 1                                                    | 1.91   | TGGGAATGAATTGAATCGAAA  | NM_004495:    | NM_013957:NM_013964:NM_013958:NM_004495:<br>NM_013956:NM_013962:NM_013961:NM_013960:<br>NM_013985:NM_013983:NM_013984:NM_013981:<br>NM_004883:NM_013982:                                            |
| 9542   | NRG2   | neuregulin 2                                                    | 0.48   | ACCCGTGGTGGTGGAGGGCAA  | NM_013982:    | NM_013985:NM_013983:NM_013984:NM_013981:<br>NM_004883:NM_013982:                                                                                                                                    |
| 9542   | NRG2   | neuregulin 2                                                    | -0.58  | CCGAGACATTCGCATCAATA   | NM_013982:    | NM_004883:NM_013982:                                                                                                                                                                                |
| 10718  | NRG3   | neuregulin 3                                                    | 1.22   | CCAACGAAATACATCAATAAA  | NM_001010848: | NM_001010848:                                                                                                                                                                                       |
| 10718  | NRG3   | neuregulin 3                                                    | -2.61  | ACCGAGGACAGTCAAGCGAAA  | NM_001010848: | NM_001010848:                                                                                                                                                                                       |
| 4900   | NRGN   | neurogranin (protein kinase C substrate, RC3)                   | -0.53  | AAGCCGGACGACGACATTTCTA | NM_006176:    | NM_006176:                                                                                                                                                                                          |
| 4900   | NRGN   | neurogranin (protein kinase C substrate, RC3)                   | 1.48   | TGGTTGGAATGTGAACAATA   | NM_006176:    | NM_006176:                                                                                                                                                                                          |
| 8204   | NRIP1  | nuclear receptor interacting protein 1                          | 0.16   | AACCAACCAATACTATATTA   | NM_003489:    | NM_003489:                                                                                                                                                                                          |
| 8204   | NRIP1  | nuclear receptor interacting protein 1                          | 0.57   | AAGCGTGCTAACGATAAAGAA  | NM_003489:    | NM_003489:                                                                                                                                                                                          |
| 83714  | NRIP2  | nuclear receptor interacting protein 2                          | 0.07   | CTGCTTCCATTTGGAATAAA   | NM_031474:    | NM_031474:                                                                                                                                                                                          |
| 83714  | NRIP2  | nuclear receptor interacting protein 2                          | 0.08   | CAGCCAGAATTCATAACAACA  | NM_031474:    | NM_031474:                                                                                                                                                                                          |
| 56675  | NRIP3  | nuclear receptor interacting protein 3                          | 0.65   | TACCTATGCTTGAAGATTAGA  | NM_020645:    | NM_020645:                                                                                                                                                                                          |
| 56675  | NRIP3  | nuclear receptor interacting protein 3                          | -1.00  | CAGGCTGCCTATATAATCTCA  | NM_020645:    | NM_020645:                                                                                                                                                                                          |
| 203447 | NRK    | Nik related kinase                                              | 0.74   | ATCGAAATGTTAGGTAATCAT  | NM_198465:    | NM_198465:                                                                                                                                                                                          |
| 203447 | NRK    | Nik related kinase                                              | 1.46   | CAGGCTAATGATGTTGTAA    | NM_198465:    | NM_198465:                                                                                                                                                                                          |
| 4901   | NRL    | neural retina leucine zipper                                    | -0.25  | CTAGATAGATTAGGACCTCTA  | NM_006177:    | NM_006177:                                                                                                                                                                                          |
| 4901   | NRL    | neural retina leucine zipper                                    | 0.82   | ATCCAACAACAGATAGATTA   | NM_006177:    | NM_006177:                                                                                                                                                                                          |
| 8829   | NRP1   | neuropilin 1                                                    | 0.83   | ACGGTCATAGACAGACCATA   | NM_003873:    | NM_001024628:NM_001024629:NM_003873:                                                                                                                                                                |
| 8829   | NRP1   | neuropilin 1                                                    | -1.57  | CACGCGATTATCAGGATCTA   | NM_003873:    | NM_001024628:NM_001024629:NM_003873:<br>NM_201264:NM_201267:NM_201279:NM_003872:<br>NM_201266:NM_018534:                                                                                            |
| 8828   | NRP2   | neuropilin 2                                                    | -4.24  | CAGGCTCTGAAGATTGCTCAA  | NM_003872:    | NM_201264:NM_201267:NM_201279:NM_003872:<br>NM_201266:NM_018534:                                                                                                                                    |
| 8828   | NRP2   | neuropilin 2                                                    | -0.14  | CTCGTGATATTTGTAGGATAA  | NM_003872:    | NM_201266:NM_018534:                                                                                                                                                                                |
| 4902   | NRTN   | neurturin                                                       | -0.65  | CGCGATAACTGTACTGAGATA  | NM_004558:    | NM_004558:                                                                                                                                                                                          |
| 4902   | NRTN   | neurturin                                                       | -0.77  | TGGCAGGCGTTCAAAGTCAA   | NM_004558:    | NM_004558:                                                                                                                                                                                          |
| 9378   | NRXN1  | neurexin 1                                                      | 0.92   | CTGGCAGCACATATATCTTTA  | NM_004801:    | NM_138735:NM_004801:                                                                                                                                                                                |
| 9378   | NRXN1  | neurexin 1                                                      | -0.57  | AGCCAGGAACCTTAGACCTCAA | NM_004801:    | NM_004801:                                                                                                                                                                                          |
| 9379   | NRXN2  | neurexin 2                                                      | -0.72  | CGCCATAGTAAGCGACGGCAA  | NM_015080:    | NM_015080:NM_138732:NM_138734:                                                                                                                                                                      |
| 9379   | NRXN2  | neurexin 2                                                      | -1.68  | ACCCGTCATGGCAAGTTCAA   | NM_015080:    | NM_015080:NM_138732:                                                                                                                                                                                |
| 9369   | NRXN3  | neurexin 3                                                      | 1.45   | ACCAGTGTGCGGTGAACTTTA  | NM_138970:    | NM_004796:NM_138970:                                                                                                                                                                                |
| 9369   | NRXN3  | neurexin 3                                                      | 0.28   | CAGGATTAATAAGAGATATCA  | NM_138970:    | NM_004796:NM_138970:                                                                                                                                                                                |
| 64324  | NSD1   | nuclear receptor binding SET domain protein 1                   | -0.78  | AAGCGGCACAAACCTCGTAA   | NM_022455:    | NM_022455:NM_172349:                                                                                                                                                                                |
| 64324  | NSD1   | nuclear receptor binding SET domain protein 1                   | 1.23   | CAGTGAGAACTGTTAATAAA   | NM_022455:    | NM_022455:NM_172349:                                                                                                                                                                                |
| 8439   | NSMAF  | neutral sphingomyelinase (N-SMase) activation associated factor | -0.04  | CACGAGTGGATTGATCTAATA  | NM_003580:    | NM_003580:                                                                                                                                                                                          |
| 8439   | NSMAF  | neutral sphingomyelinase (N-SMase) activation associated factor | -0.21  | TAGCGTGTACTTTCTATAA    | NM_003580:    | NM_003580:                                                                                                                                                                                          |
| 197370 | NSMCE1 | non-SMC element 1 homolog (S. cerevisiae)                       | -0.93  | AACCTGGTTGATCAACTTAAA  | NM_145080:    | NM_145080:                                                                                                                                                                                          |
| 197370 | NSMCE1 | non-SMC element 1 homolog (S. cerevisiae)                       | 0.70   | CCGGCTTTGCGTCTCCACAAA  | NM_145080:    | NM_145080:                                                                                                                                                                                          |
| 387338 | NSUN4  | NOL1/NOP2/Sun domain family, member 4                           | -0.70  | TACGTATGCTGGCTTGATTA   | NM_199044:    | NM_199044:                                                                                                                                                                                          |
| 387338 | NSUN4  | NOL1/NOP2/Sun domain family, member 4                           | 1.00   | ATGAACATAAATGACCTTAA   | NM_199044:    | NM_199044:                                                                                                                                                                                          |
| 221078 | NSUN6  | NOL1/NOP2/Sun domain family, member 6                           | -0.34  | CAGAAAGCAGTTAATGGATTA  | NM_182543:    | NM_182543:                                                                                                                                                                                          |
| 221078 | NSUN6  | NOL1/NOP2/Sun domain family, member 6                           | 0.54   | CTCGTCACTAATTAATGGGAA  | NM_182543:    | NM_182543:                                                                                                                                                                                          |
| 4908   | NTF3   | neurotrophin 3                                                  | -1.70  | AACGGGCAACTCCCGCTCAA   | NM_002527:    | NM_002527:                                                                                                                                                                                          |
| 4908   | NTF3   | neurotrophin 3                                                  | -2.47  | CAAGCAGATGGTGGACGTTAA  | NM_002527:    | NM_002527:                                                                                                                                                                                          |
| 4909   | NTF5   | neurotrophin 5 (neurotrophin 4/5)                               | -0.36  | AATGATGATGATATAATAATA  | M86528:       | NM_006179:                                                                                                                                                                                          |
| 4913   | NTHL1  | nth endonuclease III-like 1 (E. coli)                           | 0.42   | CACGCTGGGCAAGCTCATCTA  | NM_002528:    | NM_002528:                                                                                                                                                                                          |
| 4913   | NTHL1  | nth endonuclease III-like 1 (E. coli)                           | -3.71  | CTGAGAGGAGCAAGGTGAAATA | NM_002528:    | NM_002528:                                                                                                                                                                                          |
| 9423   | NTN1   | netrin 1                                                        | -2.76  | CTCGCGGACATCGCTGCGAA   | NM_004822:    | NM_004822:                                                                                                                                                                                          |
| 9423   | NTN1   | netrin 1                                                        | 0.99   | AAGCTGAGATTAAACATGAAA  | NM_004822:    | NM_004822:                                                                                                                                                                                          |
| 4914   | NTRK1  | neurotrophic tyrosine kinase, receptor, type 1                  | -1.40  | CACATCATCGAGAACCACAAA  | NM_002529:    | NM_002529:NM_001012331:NM_001007792:                                                                                                                                                                |
| 4914   | NTRK1  | neurotrophic tyrosine kinase, receptor, type 1                  | 1.32   | CACGGAGGCAATCGACTGCAT  | NM_002529:    | NM_002529:NM_001012331:NM_001007792:                                                                                                                                                                |
| 4915   | NTRK2  | neurotrophic tyrosine kinase, receptor, type 2                  | 1.46   | ACCACGAACAGAAGTAATGAA  | NM_006180:    | NM_001007097:NM_006180:NM_001018064:NM_001018065:NM_001018066:<br>NM_001007097:NM_006180:NM_001018064:NM_001018066:NM_001018066:<br>NM_001012338:NM_001007156:NM_002530:<br>NM_001012338:NM_002530: |
| 4915   | NTRK2  | neurotrophic tyrosine kinase, receptor, type 2                  | -0.15  | CTGACGAGTTTGTCTAGGAAA  | NM_006180:    | NM_001012338:NM_001007156:NM_002530:<br>NM_001012338:NM_002530:                                                                                                                                     |
| 4916   | NTRK3  | neurotrophic tyrosine kinase, receptor, type 3                  | 0.00   | CACGGATAACTTTATCTTGTT  | NM_002530:    | NM_006183:                                                                                                                                                                                          |
| 4916   | NTRK3  | neurotrophic tyrosine kinase, receptor, type 3                  | -1.73  | CTGGTTGGAGCGAATCTGCTA  | NM_002530:    | NM_006183:                                                                                                                                                                                          |
| 4922   | NTS    | neurotensin                                                     | 0.18   | TTGAGTTGTTAAACAGTCAA   | NM_006183:    | NM_006183:                                                                                                                                                                                          |
| 4922   | NTS    | neurotensin                                                     | -0.33  | CAGGAAGATATCTTGATACT   | NM_006183:    | NM_006183:                                                                                                                                                                                          |
| 4923   | NTSR1  | neurotensin receptor 1 (high affinity)                          | -0.86  | AAGAAGTCCGCTAACGCTTAA  | NM_002531:    | NM_002531:                                                                                                                                                                                          |
| 4923   | NTSR1  | neurotensin receptor 1 (high affinity)                          | 1.34   | CTGGCTTAAGAGGTGCGCTA   | NM_002531:    | NM_002531:                                                                                                                                                                                          |
| 23620  | NTSR2  | neurotensin receptor 2                                          | 1.50   | COGGACCTGAATGTAATGCAA  | NM_012344:    | NM_012344:                                                                                                                                                                                          |
| 23620  | NTSR2  | neurotensin receptor 2                                          | 0.22   | TGATATGGAAGAAAGACCTTTA | NM_012344:    | NM_012344:                                                                                                                                                                                          |
| 9891   | NUAK1  | NUAK family, SNF1-like kinase, 1                                | 0.76   | CTTGAGTTGATGATCAATTA   | NM_014840:    | NM_014840:                                                                                                                                                                                          |
| 9891   | NUAK1  | NUAK family, SNF1-like kinase, 1                                | -0.86  | TAGGATTTACTGGCATGGTA   | NM_014840:    | NM_014840:                                                                                                                                                                                          |
| 81788  | NUAK2  | NUAK family, SNF1-like kinase, 2                                | 0.12   | CCGGTGGCTGTGATGGTGAAA  | NM_030952:    | NM_030952:                                                                                                                                                                                          |
| 81788  | NUAK2  | NUAK family, SNF1-like kinase, 2                                | -0.33  | CTGAACGAGAGGACTACTAAA  | NM_030952:    | NM_030952:                                                                                                                                                                                          |
| 84955  | NUDCD1 | NudC domain containing 1                                        | 0.20   | GAGCTAGTAATTGAGAGATAA  | NM_032869:    | NM_032869:                                                                                                                                                                                          |
| 84955  | NUDCD1 | NudC domain containing 1                                        | 2.20   | TGCGATGTTGACCTACGTAA   | NM_032869:    | NM_032869:                                                                                                                                                                                          |
| 53343  | NUDT9  | nudix (nucleoside diphosphate linked moiety X)-type motif 9     | 2.65   | CACCGTCAGATCCCATTATA   | NM_024047:    | NM_198038:NM_024047:NM_198039:                                                                                                                                                                      |
| 53343  | NUDT9  | nudix (nucleoside diphosphate linked moiety X)-type motif 9     | 0.55   | ATGATAATCTTATGCTAGAAA  | NM_024047:    | NM_198038:NM_024047:NM_198039:                                                                                                                                                                      |
| 9972   | NUP153 | nucleoporin 153kDa                                              | -2.01  | CGGTTGAAATTTGTAATTA    | NM_005124:    | NM_005124:                                                                                                                                                                                          |
| 9972   | NUP153 | nucleoporin 153kDa                                              | 0.73   | ATGGAACGCGTTGAAATTTGTA | NM_005124:    | NM_005124:                                                                                                                                                                                          |
| 23636  | NUP62  | nucleoporin 62kDa                                               | -0.46  | ACCGGCTTGGCTTGAATTTA   | NM_016553:    | NM_016553:NM_153719:NM_153718:NM_012346:                                                                                                                                                            |
| 23636  | NUP62  | nucleoporin 62kDa                                               | 0.24   | CGGCTTGGCTTGAATTTA     | NM_016553:    | NM_016553:NM_153719:NM_153718:NM_012346:                                                                                                                                                            |
| 4928   | NUP98  | nucleoporin 98kDa                                               | -3.01  | TGGGACTACTATTAATTTAA   | NM_005387:    | NM_139131:NM_016320:NM_005387:NM_139132:                                                                                                                                                            |
| 4928   | NUP98  | nucleoporin 98kDa                                               | -9.93  | CAGGTATTACTGCTATGAAA   | NM_005387:    | NM_139131:NM_016320:NM_005387:NM_139132:                                                                                                                                                            |

|        |         |                                                                         |       |                        |            |                                                                                  |
|--------|---------|-------------------------------------------------------------------------|-------|------------------------|------------|----------------------------------------------------------------------------------|
| 11097  | NUPL2   | nucleoporin like 2                                                      | 0.21  | CAGCATCATTGCAACAGATAA  | NM_007342: | NM_007342:                                                                       |
| 11097  | NUPL2   | nucleoporin like 2                                                      | -0.19 | CAGCAATAACTTACAGAGTTA  | NM_007342: | NM_007342:                                                                       |
| 64359  | NXN     | nucleoredoxin                                                           | 1.24  | AAGGTAATGGTTCATATCATA  | NM_022463: | NM_022463:                                                                       |
| 64359  | NXN     | nucleoredoxin                                                           | -0.09 | AACCGGCTGACGGAAATCCAA  | NM_022463: | NM_022463:                                                                       |
| 51667  | NYREN18 | NEDD8 ultimate buster-1                                                 | -0.83 | ATCCTCAGATGGTGGTGTAA   | NM_016118: | NM_016118:                                                                       |
| 51667  | NYREN18 | NEDD8 ultimate buster-1                                                 | 0.36  | TAGAGGCTTATGAGTATCTTA  | NM_016118: | NM_016118:                                                                       |
| 4938   | OAS1    | 2'-5'-oligoadenylate synthetase 1, 40/46kDa                             | -2.03 | CCCGCGGACCCCTACAGGAAA  | NM_002534: | NM_001032409:NM_002534:NM_016816:                                                |
| 4938   | OAS1    | 2'-5'-oligoadenylate synthetase 1, 40/46kDa                             | 1.11  | CCCTAAGAGTAATAATAAATA  | NM_002534: | NM_002534:                                                                       |
| 4939   | OAS2    | 2'-5'-oligoadenylate synthetase 2, 69/71kDa                             | -0.81 | CTCGTGTGTTCCATAACTCA   | NM_002535: | NM_016817:NM_002535:                                                             |
| 4939   | OAS2    | 2'-5'-oligoadenylate synthetase 2, 69/71kDa                             | 0.64  | ACGCTCTGAGCTTAAATGATA  | NM_002535: | NM_016817:NM_002535:                                                             |
| 8638   | OASL    | 2'-5'-oligoadenylate synthetase-like                                    | 0.64  | CAGCTGGAATTCGAAGGCCAA  | NM_003733: | NM_003733:NM_198213:                                                             |
| 8638   | OASL    | 2'-5'-oligoadenylate synthetase-like                                    | -0.69 | CAGGTGCTCCTTAGCCAAATA  | NM_003733: | NM_003733:NM_198213:                                                             |
| 4942   | OAT     | ornithine aminotransferase (gyrate atrophy)                             | -0.35 | TAACGTAACATAAATATGATA  | NM_000274: | NM_000274:                                                                       |
| 4942   | OAT     | ornithine aminotransferase (gyrate atrophy)                             | -0.37 | TTGCTTTGTAACGTAACATAA  | NM_000274: | NM_000274:                                                                       |
| 4948   | OCA2    | oculocutaneous albinism II (pink-eye dilution homolog, mouse)           | 0.25  | GACCTTGACTACACTCTA     | NM_000275: | NM_000275:                                                                       |
| 4948   | OCA2    | oculocutaneous albinism II (pink-eye dilution homolog, mouse)           | 0.21  | TGGAATGAGCCTTGACACTAA  | NM_000275: | NM_000275:                                                                       |
| 4952   | OCRL    | oculocerebrorenal syndrome of Lowe                                      | 0.54  | TAGGGTCATACCACAGGAAA   | NM_000276: | NM_000276:NM_001587:                                                             |
| 4952   | OCRL    | oculocerebrorenal syndrome of Lowe                                      | 1.75  | CTAGGTGTTGAACTTAGTTAA  | NM_000276: | NM_000276:NM_001587:                                                             |
| 4953   | ODC1    | (ornithi) ornithine decarboxylase 1                                     | 0.08  | AAGCATTGTAGCTTGACAA    | NM_002539: | NM_002539:                                                                       |
| 4953   | ODC1    | (ornithi) ornithine decarboxylase 1                                     | -0.16 | TAGCTGTTAAGTCAAGTTTA   | NM_002539: | NM_002539:                                                                       |
| 10178  | ODZ1    | odz, odd Oz/ten-m homolog 1 (Drosophila)                                | 0.75  | CTCTATGATTCTTACTATAA   | NM_014253: | NM_014253:                                                                       |
| 10178  | ODZ1    | odz, odd Oz/ten-m homolog 1 (Drosophila)                                | -3.60 | AAGGCTATAATCCGGCCTTAA  | NM_014253: | NM_014253:                                                                       |
| 57451  | ODZ2    | odz, odd Oz/ten-m homolog 2 (Drosophila)                                | 0.50  | CACCACATCCTCAATGTTAA   | XM_047995: | XM_047995:                                                                       |
| 57451  | ODZ2    | odz, odd Oz/ten-m homolog 2 (Drosophila)                                | 0.98  | CAGCATCTGGAGTTACGAAA   | XM_047995: | XM_047995:                                                                       |
| 55714  | ODZ3    | odz, odd Oz/ten-m homolog 3 (Drosophila)                                | -1.58 | CGGGCTGTGTCAAAAGATAA   | XM_371717: | XM_371717:                                                                       |
| 55714  | ODZ3    | odz, odd Oz/ten-m homolog 3 (Drosophila)                                | 0.01  | CCCAAAATTTGATTACAGAAA  | XM_371717: | XM_371717:                                                                       |
| 26011  | ODZ4    | odz, odd Oz/ten-m homolog 4 (Drosophila)                                | 1.37  | CCAGATCAACACAGTACTTAA  | XM_166254: | XM_166254:                                                                       |
| 26011  | ODZ4    | odz, odd Oz/ten-m homolog 4 (Drosophila)                                | -0.61 | CCGGCCGGCCTTAACTCAA    | XM_166254: | XM_166254:                                                                       |
| 8481   | OFD1    | oral-facial-digital syndrome 1                                          | -0.07 | TACCATCGGAGAGTCATTTAA  | NM_003611: | NM_003611:                                                                       |
| 8481   | OFD1    | oral-facial-digital syndrome 1                                          | -0.32 | CCAGTCTTTGGCAATAACAA   | NM_003611: | NM_003611:                                                                       |
| 4967   | OGDH    | oxoglutarate (alpha-ketoglutarate) dehydrogenase (lipoamide)            | -0.97 | TTGGCTTGACCCATAAACTAA  | NM_002541: | NM_002541:                                                                       |
| 4967   | OGDH    | oxoglutarate (alpha-ketoglutarate) dehydrogenase (lipoamide)            | 0.43  | CACCTTTCTTTCTCTTTAA    | NM_002541: | NM_002541:                                                                       |
| 11054  | OGFR    | (opioid) opioid growth factor receptor                                  | -7.45 | CAGAATGACAGGTCACGAAA   | NM_007346: | NM_007346:                                                                       |
| 11054  | OGFR    | (opioid) opioid growth factor receptor                                  | 0.11  | CACGCCAAACCTGAGTTTCTA  | NM_007346: | NM_007346:                                                                       |
| 79627  | OGFRL1  | opioid growth factor receptor-like 1                                    | 0.41  | TTCAAAGATATCCGATATCAA  | NM_024576: | NM_024576:                                                                       |
| 79627  | OGFRL1  | opioid growth factor receptor-like 1                                    | -0.60 | AAGAACTACTCGTATTTCTAA  | NM_024576: | NM_024576:                                                                       |
| 4968   | OGG1    | 8-oxoguanine DNA glycosylase                                            | 0.00  | CGGGACCTACACCTCAGGAAA  | NM_002542: | NM_002542:NM_016819:NM_016820:NM_016821:NM_016826:NM_016828:NM_016827:NM_016829: |
| 4968   | OGG1    | 8-oxoguanine DNA glycosylase                                            | -1.28 | CTGGTCTGCCTTCTGGACAA   | NM_002542: | NM_002542:NM_016819:NM_016820:NM_016821:NM_016826:NM_016828:NM_016827:NM_016829: |
| 8473   | OGT     | O-linked N-acetylglucosamine (GlcNAc) transferase (UDP-N-acetylglu      | 0.07  | AAGATTAATGTCTTCTATAAA  | NM_003605: | NM_003605:NM_181673:NM_181672:                                                   |
| 8473   | OGT     | O-linked N-acetylglucosamine (GlcNAc) transferase (UDP-N-acetylglu      | 0.31  | CAGGTAAGTATAAAGTATTCAA | NM_003605: | NM_003605:NM_181673:NM_181672:                                                   |
| 170392 | OIT3    | oncoprotein induced transcript 3                                        | 0.81  | AAGCTGGGTATAATATTTCAA  | NM_152635: | NM_152635:                                                                       |
| 170392 | OIT3    | oncoprotein induced transcript 3                                        | 0.84  | ATGGTGCAATCAGACCACAAA  | NM_152635: | NM_152635:                                                                       |
| 10439  | OLFM1   | olfactomedin 1                                                          | -1.17 | CCGGGACGGGATAAATATGCA  | NM_006334: | NM_006334:NM_058199:NM_014279:                                                   |
| 10439  | OLFM1   | olfactomedin 1                                                          | 1.35  | GCAGTTTAAAGGGCTAACTTAA | NM_006334: | NM_006334:                                                                       |
| 93145  | OLFM2   | olfactomedin 2                                                          | 1.35  | CAGGACCTTTGACATTTTGAAA | NM_058164: | NM_058164:                                                                       |
| 93145  | OLFM2   | olfactomedin 2                                                          | -0.60 | CACGGACGTGCCCTTCCACAAA | NM_058164: | NM_058164:                                                                       |
| 10562  | OLFM4   | olfactomedin 4                                                          | -2.84 | CAGAGTTAACTGACCACCAA   | NM_006418: | NM_006418:                                                                       |
| 10562  | OLFM4   | olfactomedin 4                                                          | -2.95 | TAGGATTTCTTGACAGGAAA   | NM_006418: | NM_006418:                                                                       |
| 169611 | OLFML2A | olfactomedin-like 2A                                                    | 1.01  | TCCAGTCAATTTAGAACAATA  | NM_182487: | NM_182487:                                                                       |
| 169611 | OLFML2A | olfactomedin-like 2A                                                    | 1.32  | CGGCCACTTCCAAACCTCTA   | NM_182487: | NM_182487:                                                                       |
| 25903  | OLFML2B | olfactomedin-like 2B                                                    | -0.01 | GCGGATTTACGTAACCAACTA  | NM_015441: | NM_015441:                                                                       |
| 25903  | OLFML2B | olfactomedin-like 2B                                                    | -2.04 | TTGTATAATATTGCAAATGTA  | NM_015441: | NM_015441:                                                                       |
| 116448 | OLIG1   | oligodendrocyte transcription factor 1                                  | 1.32  | CGGAATTTAACTGGCAGTTTA  | NM_138983: | NM_138983:                                                                       |
| 116448 | OLIG1   | oligodendrocyte transcription factor 1                                  | 1.70  | TCGATTTGTTCACAGCGTTAA  | NM_138983: | NM_138983:                                                                       |
| 10215  | OLIG2   | oligodendrocyte lineage transcription factor 2                          | 1.35  | AGCGTGTGATGGTCAATCCAA  | NM_005806: | NM_005806:                                                                       |
| 10215  | OLIG2   | oligodendrocyte lineage transcription factor 2                          | -2.20 | CTCGTGTATTGGGAGAATAT   | NM_005806: | NM_005806:                                                                       |
| 4973   | OLR1    | oxidised low density lipoprotein (lectin-like) receptor 1               | 0.95  | CAGAGGCCATTCGAAATCAA   | NM_002543: | NM_002543:                                                                       |
| 4973   | OLR1    | oxidised low density lipoprotein (lectin-like) receptor 1               | 0.63  | ATGCTATAATCCGAAACATA   | NM_002543: | NM_002543:                                                                       |
| 115209 | OMA1    | OMA1 homolog, zinc metallopeptidase (S. cerevisiae)                     | 0.11  | ACCGATATTCACTAATTTCT   | NM_145243: | NM_145243:                                                                       |
| 115209 | OMA1    | OMA1 homolog, zinc metallopeptidase (S. cerevisiae)                     | 0.11  | CAGATCAATGGGTATTGCTA   | NM_145243: | NM_145243:                                                                       |
| 4974   | OMG     | oligodendrocyte myelin glycoprotein                                     | -5.41 | CACCTCTGGATTTACCTCAA   | NM_002544: | NM_002544:                                                                       |
| 4974   | OMG     | oligodendrocyte myelin glycoprotein                                     | 1.29  | CAGGTGGTCATGTACCACAAA  | NM_002544: | NM_002544:                                                                       |
| 4975   | OMP     | (olfactor) olfactory marker protein                                     | -2.02 | CTGGAATGTGCTGGACAAA    | NM_006189: | NM_006189:                                                                       |
| 4975   | OMP     | (olfactor) olfactory marker protein                                     | 0.08  | CTGGATGCCATAGATTGGAA   | NM_006189: | NM_006189:                                                                       |
| 4978   | OPCML   | opioid binding protein/cell adhesion molecule-like                      | 1.11  | CTGGGACACTATCCTACTATA  | NM_002545: | NM_001012393:NM_002545:                                                          |
| 4978   | OPCML   | opioid binding protein/cell adhesion molecule-like                      | 2.67  | TAGGCCAAAGTAGCAAGCTAA  | NM_002545: | NM_001012393:NM_002545:                                                          |
| 4983   | OPHN1   | oligophrenin 1                                                          | 0.99  | TAGGGCCACAGTCCCTTTAAA  | NM_002547: | NM_002547:                                                                       |
| 4983   | OPHN1   | oligophrenin 1                                                          | 1.38  | GCCTTGGACTTAACTGAA     | NM_002547: | NM_002547:                                                                       |
| 5956   | OPN1LW  | opsin 1 (cone pigments), long-wave-sensitive (color blindness, protan)  | -4.50 | CAGCACTACAGCATTTGGAA   | NM_020061: | NM_020061:                                                                       |
| 2652   | OPN1MW  | opsin 1 (cone pigments), medium-wave-sensitive (color blindness, de     | 1.48  | CAGCATCATCGTCTCTGCTA   | NM_000513: | NM_000513:                                                                       |
| 2652   | OPN1MW  | opsin 1 (cone pigments), medium-wave-sensitive (color blindness, de     | 1.49  | CAGCGTTGTGAACAGGCTCTA  | NM_000513: | NM_000513:                                                                       |
| 611    | OPN1SW  | opsin 1 (cone pigments), short-wave-sensitive (color blindness, tritan) | -0.77 | CAAGAGTGTCTGATCTACAAA  | NM_001708: | NM_001708:                                                                       |
| 611    | OPN1SW  | opsin 1 (cone pigments), short-wave-sensitive (color blindness, tritan) | 0.19  | CGCCATGTACATGGTCAACAA  | NM_001708: | NM_001708:                                                                       |
| 23596  | OPN3    | opsin 3 (encephalopsin, panopsin)                                       | 2.17  | ACCGTCTTATGTAATATCAA   | NM_014322: | NM_001030012:NM_014322:NM_001030011:                                             |
| 23596  | OPN3    | opsin 3 (encephalopsin, panopsin)                                       | 0.44  | TACCCTGTTCTATGTAATATCA | NM_014322: | NM_001030012:NM_014322:NM_001030011:                                             |
| 94233  | OPN4    | opsin 4 (melanopsin)                                                    | -1.51 | ACGGTTGATGTTCCAGACCAT  | NM_033282: | NM_033282:NM_001030015:                                                          |
| 94233  | OPN4    | opsin 4 (melanopsin)                                                    | -1.50 | TGGCGTAGTTACATATCTGAA  | NM_033282: | NM_033282:NM_001030015:                                                          |
| 221391 | OPN5    | opsin 5                                                                 | 0.14  | CAGCCTGGATCGATATTGAAA  | NM_181744: | NM_181744:NM_001030051:                                                          |
| 221391 | OPN5    | opsin 5                                                                 | -3.10 | CAGCCTTTCCACATACTGGAA  | NM_181744: | NM_001030051:                                                                    |
| 221391 | OPN5    | opsin 5                                                                 | 0.82  | TAGGAGTATCCAAGTATCTTAA | NM_181744: | NM_181744:NM_001030051:                                                          |
| 221391 | OPN5    | opsin 5                                                                 | -3.14 | CACCGTAACCCACAGTCAGGAA | NM_181744: | NM_181744:NM_001030051:                                                          |
| 4985   | OPRD1   | opioid receptor, delta 1                                                | 1.32  | CAGCATCTTACAGCTCACCTA  | NM_000911: | NM_000911:                                                                       |
| 4985   | OPRD1   | opioid receptor, delta 1                                                | 1.30  | CGGCATCGTCCGCTACACTAA  | NM_000911: | NM_000911:                                                                       |
| 4986   | OPRK1   | opioid receptor, kappa 1                                                | 0.94  | CAGATGCTTTAGTTACTACAA  | NM_000912: | NM_000912:                                                                       |
| 4986   | OPRK1   | opioid receptor, kappa 1                                                | 0.65  | TAGGTTTAACTCAGATCACTA  | NM_000912: | NM_000912:                                                                       |
| 4987   | OPRL1   | opiate receptor-like 1                                                  | -0.97 | ATGGGACAGGTCAAAGCATTA  | NM_000913: | NM_000913:NM_182647:                                                             |
| 4987   | OPRL1   | opiate receptor-like 1                                                  | -1.21 | CTGGCTGGTATTTCTCGTAA   | NM_000913: | NM_000913:NM_182647:                                                             |
| 4988   | OPRM1   | opioid receptor, mu 1                                                   | -3.07 | TCCAGAGTGTGAATACCTTAA  | NM_000914: | NM_001008503:NM_000914:NM_001008504:NM_01008505:                                 |
| 4988   | OPRM1   | opioid receptor, mu 1                                                   | 0.83  | TTACCGTAGTAAACACATAAA  | NM_000914: | NM_000914:                                                                       |
| 10280  | OPRS1   | opioid receptor, sigma 1                                                | 0.27  | AGGGATATCCATGCTTATGTA  | NM_005866: | NM_005866:NM_147160:NM_147157:NM_147158:NM_147159:                               |
| 10280  | OPRS1   | opioid receptor, sigma 1                                                | -8.56 | CGGCTTAGGCTCACCACCTA   | NM_005866: | NM_005866:NM_147160:NM_147157:NM_147158:NM_147159:                               |

|        |         |                                                       |       |                       |               |                                                  |
|--------|---------|-------------------------------------------------------|-------|-----------------------|---------------|--------------------------------------------------|
| 10133  | OPTN    | optineurin                                            | -1.25 | CAGCGGAATATTCCGATTCA  | NM_021980:    | NM_001008212;NM_001008213;NM_001008211;M_021980; |
| 10133  | OPTN    | optineurin                                            | 0.67  | AAGCATGCTATCAGAAATCAA | NM_021980:    | NM_001008212;NM_001008213;NM_001008211;M_021980; |
| 341276 | OR10A2  | olfactory receptor, family 10, subfamily A, member 2  | 0.95  | CGGCCTAAATCAAATAATCA  | NM_001004460: | NM_001004460;                                    |
| 283297 | OR10A4  | olfactory receptor, family 10, subfamily A, member 4  | 0.95  | ACCATTTACTGGTTACTTTA  | XM_208604.1:  | NM_207186;                                       |
| 283297 | OR10A4  | olfactory receptor, family 10, subfamily A, member 4  | -2.09 | CTCAAGGAATAAAGAAGTGAA | XM_208604.1:  | NM_207186;                                       |
| 144124 | OR10A5  | olfactory receptor, family 10, subfamily A, member 5  | -0.04 | CCTGACATTTCTAACTATCTA | NM_178168:    | NM_178168;                                       |
| 144124 | OR10A5  | olfactory receptor, family 10, subfamily A, member 5  | -0.04 | GAAGTTGTTATCATTATCCTA | NM_178168:    | NM_178168;                                       |
| 121275 | OR10AD1 | olfactory receptor, family 10, subfamily AD, member 1 | 1.06  | AGTATTGTTCTTACATGAA   | NM_001004134: | NM_001004134;                                    |
| 121275 | OR10AD1 | olfactory receptor, family 10, subfamily AD, member 1 | -1.02 | CTGGTCTTTGGGCTGATCAA  | NM_001004134: | NM_001004134;                                    |
| 26539  | OR10H1  | olfactory receptor, family 10, subfamily H, member 1  | 2.09  | AAGAAGACCTCTTCCAGTAA  | NM_013940:    | NM_013940;                                       |
| 26539  | OR10H1  | olfactory receptor, family 10, subfamily H, member 1  | 1.05  | GACCTTCTCAGTAAACTCTA  | NM_013940:    | NM_013940;                                       |
| 26538  | OR10H2  | olfactory receptor, family 10, subfamily H, member 2  | 1.06  | CACCTGATGCCACCACCTA   | NM_013939:    | NM_013939;                                       |
| 26538  | OR10H2  | olfactory receptor, family 10, subfamily H, member 2  | 0.78  | TTGGCTGTGGAAATAATGTA  | NM_013939:    | NM_013939;                                       |
| 26532  | OR10H3  | olfactory receptor, family 10, subfamily H, member 3  | 0.94  | CAGAACCATTCTGAATTTAT  | NM_013938:    | NM_013938;                                       |
| 26532  | OR10H3  | olfactory receptor, family 10, subfamily H, member 3  | -0.49 | CCACTGCATTACAACATGCTA | NM_013938:    | NM_013938;                                       |
| 26476  | OR10J1  | olfactory receptor, family 10, subfamily J, member 1  | 0.00  | CTGATTGTAGCAATAACGGAA | NM_012351:    | NM_012351;                                       |
| 26476  | OR10J1  | olfactory receptor, family 10, subfamily J, member 1  | -0.87 | TGGCGTGTCTTGCACATA    | NM_012351:    | NM_012351;                                       |
| 26531  | OR11A1  | olfactory receptor, family 11, subfamily A, member 1  | 0.27  | AACGTTAGGCTGGTATAGAA  | NM_013937:    | NM_013937;                                       |
| 26531  | OR11A1  | olfactory receptor, family 11, subfamily A, member 1  | -0.52 | CCAGATGTTGTATAACTATTA | NM_013937:    | NM_013937;                                       |
| 26529  | OR12D2  | olfactory receptor, family 12, subfamily D, member 2  | 0.37  | ACCTGGATATCTGTTACTCTA | NM_013936:    | NM_013936;                                       |
| 26529  | OR12D2  | olfactory receptor, family 12, subfamily D, member 2  | -0.74 | CCGGATTTGGCCATCATGTA  | NM_013936:    | NM_013936;                                       |
| 81797  | OR12D3  | olfactory receptor, family 12, subfamily D, member 3  | -1.07 | CACAATCAAGCTAAACCTACA | NM_030959:    | NM_030959;                                       |
| 81797  | OR12D3  | olfactory receptor, family 12, subfamily D, member 3  | 0.83  | CCCAATAAACCAACCGGTAA  | NM_030959:    | NM_030959;                                       |
| 8383   | OR1A1   | olfactory receptor, family 1, subfamily A, member 1   | 0.85  | CACGGTTGTCTTTGTATTA   | NM_014565:    | NM_014565;                                       |
| 8383   | OR1A1   | olfactory receptor, family 1, subfamily A, member 1   | 0.01  | CGCAGTATCACTGTAATGTA  | NM_014565:    | NM_014565;                                       |
| 26189  | OR1A2   | olfactory receptor, family 1, subfamily A, member 2   | 0.98  | AGCATTAACTCTTTCATCTA  | NM_012352:    | NM_012352;                                       |
| 26189  | OR1A2   | olfactory receptor, family 1, subfamily A, member 2   | -0.57 | TGCAGTATAACTGTGATGTA  | NM_012352:    | NM_012352;                                       |
| 4991   | OR1D2   | olfactory receptor, family 1, subfamily D, member 2   | -3.90 | CACITTTGATGGTATACCTTA | NM_002548:    | NM_002548;                                       |
| 4991   | OR1D2   | olfactory receptor, family 1, subfamily D, member 2   | 0.29  | CTGGGAAGACTCTAGATAAA  | NM_002548:    | NM_002548;                                       |
| 8387   | OR1E1   | olfactory receptor, family 1, subfamily E, member 1   | -3.68 | CAGAGTATTATCAGAAAGAA  | NM_003553:    | NM_003553;                                       |
| 8387   | OR1E1   | olfactory receptor, family 1, subfamily E, member 1   | -0.19 | TCCCAAGTTGTACAGAAGAT  | NM_003553:    | NM_003553;                                       |
| 8388   | OR1E2   | olfactory receptor, family 1, subfamily E, member 2   | 0.71  | CCAAATGTACTCTTCTTGTA  | NM_003554:    | NM_003554;                                       |
| 8388   | OR1E2   | olfactory receptor, family 1, subfamily E, member 2   | -0.57 | CTGGAAAGGGTCAATTTGAAA | NM_003554:    | NM_003554;                                       |
| 4992   | OR1F1   | olfactory receptor, family 1, subfamily F, member 1   | -2.76 | ATGGGTGGTGGCAACCTGAA  | NM_012360:    | NM_012360;                                       |
| 4992   | OR1F1   | olfactory receptor, family 1, subfamily F, member 1   | 0.82  | CAGCACCATCATTGCTGTGTA | NM_012360:    | NM_012360;                                       |
| 8390   | OR1G1   | olfactory receptor, family 1, subfamily G, member 1   | -0.71 | CACAGTGCATCAGTATGATA  | NM_003555:    | NM_003555;                                       |
| 8390   | OR1G1   | olfactory receptor, family 1, subfamily G, member 1   | -1.52 | CCTGATTATCTTACACGAA   | NM_003555:    | NM_003555;                                       |
| 26219  | OR1J4   | olfactory receptor, family 1, subfamily J, member 4   | -0.09 | CAGGATCAATCCATCTTTAT  | XM_294533.1:  | NM_001004452;                                    |
| 26219  | OR1J4   | olfactory receptor, family 1, subfamily J, member 4   | -1.34 | CCCAAGATGTTATTAAGCAT  | XM_294533.1:  | NM_001004452;                                    |
| 127623 | OR2B11  | olfactory receptor, family 2, subfamily B, member 11  | 0.60  | ACCCTGTGAATGACACCATA  | NM_001004492: | NM_001004492;                                    |
| 81697  | OR2B2   | olfactory receptor, family 2, subfamily B, member 2   | 0.08  | CACCAGAAAGTAACTAGTAA  | NM_033057:    | NM_033057;                                       |
| 81697  | OR2B2   | olfactory receptor, family 2, subfamily B, member 2   | -0.68 | CTGGATTAGGGCTTAGCAA   | NM_033057:    | NM_033057;                                       |
| 4993   | OR2C1   | olfactory receptor, family 2, subfamily C, member 1   | -0.15 | AAGATCATCGTATCTCCTA   | NM_012368:    | NM_012368;                                       |
| 4993   | OR2C1   | olfactory receptor, family 2, subfamily C, member 1   | 0.67  | CAAGTTCAATCCCTGTTCTA  | NM_012368:    | NM_012368;                                       |
| 81472  | OR2C3   | olfactory receptor, family 2, subfamily C, member 3   | -0.61 | CCGGCAGATGGTATTAGAGAA | NM_198074:    | NM_198074;                                       |
| 81472  | OR2C3   | olfactory receptor, family 2, subfamily C, member 3   | 0.40  | TCCCTGGATAATAAAGTTTGA | NM_198074:    | NM_198074;                                       |
| 120776 | OR2D2   | olfactory receptor, family 2, subfamily D, member 2   | 1.15  | CAGCTGCTATTTATCGTATTA | NM_003700:    | NM_003700;                                       |
| 120776 | OR2D2   | olfactory receptor, family 2, subfamily D, member 2   | 0.40  | CAGCAATTATCACTTACATGA | NM_003700:    | NM_003700;                                       |
| 26211  | OR2F1   | olfactory receptor, family 2, subfamily F, member 1   | 0.84  | CAGAACAAGTTTATTGATCA  | NM_012369:    | NM_012369;                                       |
| 26211  | OR2F1   | olfactory receptor, family 2, subfamily F, member 1   | -1.85 | CTGGCAGAACTATTATGGAA  | NM_012369:    | NM_012369;                                       |
| 26716  | OR2H1   | olfactory receptor, family 2, subfamily H, member 1   | 2.20  | CCACATTAAGTGGCAATATA  | NM_030883:    | NM_030883;                                       |
| 26716  | OR2H1   | olfactory receptor, family 2, subfamily H, member 1   | -0.19 | TAGCTCCATAAGGCACACAAA | NM_030883:    | NM_030883;                                       |
| 7932   | OR2H2   | olfactory receptor, family 2, subfamily H, member 2   | -5.53 | CCTCTAACCTAGTGGCCAA   | NM_007160:    | NM_007160;                                       |
| 7932   | OR2H2   | olfactory receptor, family 2, subfamily H, member 2   | 0.66  | CTGGGTATTGGGCTAGTGGAA | NM_007160:    | NM_007160;                                       |
| 26707  | OR2J2   | olfactory receptor, family 2, subfamily J, member 2   | 2.22  | CAAGTTCGAAAGACTCTTTA  | NM_030905:    | NM_030905;                                       |
| 26707  | OR2J2   | olfactory receptor, family 2, subfamily J, member 2   | -0.53 | CACCGAGTCTTAATCCTCTAA | NM_030905:    | NM_030905;                                       |
| 284521 | OR2L13  | olfactory receptor, family 2, subfamily L, member 13  | 0.48  | CAAGTTGATCCCAACAGCTA  | NM_175911:    | NM_175911;                                       |
| 284521 | OR2L13  | olfactory receptor, family 2, subfamily L, member 13  | -1.40 | TAGGTACATTTAAGCAGTCAA | NM_175911:    | NM_175911;                                       |
| 391192 | OR2L3   | olfactory receptor, family 2, subfamily L, member 3   | -1.46 | TAGGATCTTCCCACCATCAA  | NM_001004687: | NM_001004687;                                    |
| 26245  | OR2M4   | olfactory receptor, family 2, subfamily M, member 4   | 0.27  | ACCCAAGATGATCTTCAGTCA | XM_371358:    | NM_017504;                                       |
| 26245  | OR2M4   | olfactory receptor, family 2, subfamily M, member 4   | 0.40  | CTCCTCATCTACATAGAGAAA | XM_371358:    | NM_017504;                                       |
| 56656  | OR2S2   | olfactory receptor, family 2, subfamily S, member 2   | -0.35 | CACCGTGGTATCGTCTTCTA  | NM_019897:    | NM_019897;                                       |
| 56656  | OR2S2   | olfactory receptor, family 2, subfamily S, member 2   | 1.90  | CGGGACCTTATTTCTCATGTA | NM_019897:    | NM_019897;                                       |
| 343172 | OR2T8   | olfactory receptor, family 2, subfamily T, member 8   | -0.51 | GTGGCCTTAAAGTGGTAAATA | NM_001005522: | NM_001005522;                                    |
| 343172 | OR2T8   | olfactory receptor, family 2, subfamily T, member 8   | -0.68 | ACCTTTATTTCAATCTCCTA  | NM_001005522: | NM_001005522;                                    |
| 26692  | OR2W1   | olfactory receptor, family 2, subfamily W, member 1   | 1.72  | CAAAGCAATATAGTCTTTA   | NM_030903:    | NM_030903;                                       |
| 26692  | OR2W1   | olfactory receptor, family 2, subfamily W, member 1   | -0.51 | CTGGAGTATTAGTTGGCCAA  | NM_030903:    | NM_030903;                                       |
| 4994   | OR3A1   | olfactory receptor, family 3, subfamily A, member 1   | -2.90 | AAGCTTTCAGACAAGGATAAA | NM_002550:    | NM_002550;                                       |
| 4994   | OR3A1   | olfactory receptor, family 3, subfamily A, member 1   | 1.28  | CAAGCTTTCAGACAAGGATAA | NM_002550:    | NM_002550;                                       |
| 4995   | OR3A2   | olfactory receptor, family 3, subfamily A, member 2   | -1.35 | AAGAGGTATCTTCAACTACAT | NM_002551:    | NM_002551;                                       |
| 4995   | OR3A2   | olfactory receptor, family 3, subfamily A, member 2   | 1.10  | CACGTGGCAGCTGCAGTTCTA | NM_002551:    | NM_002551;                                       |
| 8392   | OR3A3   | olfactory receptor, family 3, subfamily A, member 3   | 1.19  | CAGGGCGCTGTGTCAGCTA   | NM_012373:    | NM_012373;                                       |
| 8392   | OR3A3   | olfactory receptor, family 3, subfamily A, member 3   | -0.87 | CTGGGTTCAAGTGAATCTTCA | NM_012373:    | NM_012373;                                       |
| 219429 | OR4C11  | olfactory receptor, family 4, subfamily C, member 11  | 0.19  | TAGGTCCTTAAATCACTCTA  | NM_001004700: | NM_001004700;                                    |
| 219429 | OR4C11  | olfactory receptor, family 4, subfamily C, member 11  | 0.09  | CCCTATTGTTGATCATTTA   | NM_001004700: | NM_001004700;                                    |
| 256144 | OR4C3   | olfactory receptor, family 4, subfamily C, member 3   | -0.12 | CTCAGTGACCTGGAACTCTAT | NM_001004702: | NM_001004702;                                    |
| 256144 | OR4C3   | olfactory receptor, family 4, subfamily C, member 3   | -1.83 | CTCCTACATGTGATCCTGTA  | NM_001004702: | NM_001004702;                                    |
| 219432 | OR4C6   | olfactory receptor, family 4, subfamily C, member 6   | 0.04  | CACGGTGGTGTATTGTTCTT  | NM_001004704: | NM_001004704;                                    |
| 219432 | OR4C6   | olfactory receptor, family 4, subfamily C, member 6   | 1.07  | CTGAAGTCTTACAGCTCTAAA | NM_001004704: | NM_001004704;                                    |
| 26689  | OR4D1   | olfactory receptor, family 4, subfamily D, member 1   | 1.71  | CAGACCAAGAGCTCCAGAAA  | XM_292627.2:  | NM_012374;                                       |
| 26689  | OR4D1   | olfactory receptor, family 4, subfamily D, member 1   | -0.63 | CTCCGAAATCTAGCTCTCATA | XM_292627.2:  | NM_012374;                                       |
| 124538 | OR4D2   | olfactory receptor, family 4, subfamily D, member 2   | 2.52  | ACCAATTTGGCTAAATTAGTA | NM_001004707: | NM_001004707;                                    |
| 124538 | OR4D2   | olfactory receptor, family 4, subfamily D, member 2   | -6.04 | CTGGATGGCTTATGATTCTA  | NM_001004707: | NM_001004707;                                    |
| 79345  | OR51B2  | olfactory receptor, family 51, subfamily B, member 2  | 0.93  | ATCCTCTTCTCAATTTCTA   | NM_033180:    | NM_033180;                                       |
| 79345  | OR51B2  | olfactory receptor, family 51, subfamily B, member 2  | 0.37  | CTCCTATTTCTAAATTTCTAA | NM_033180:    | NM_033180;                                       |
| 79339  | OR51B4  | olfactory receptor, family 51, subfamily B, member 4  | -0.38 | CTGTGCTGATATCAGCTTTAA | NM_033179:    | NM_033179;                                       |
| 79339  | OR51B4  | olfactory receptor, family 51, subfamily B, member 4  | 0.73  | TTCTTATATACTAATCTTAA  | NM_033179:    | NM_033179;                                       |
| 143503 | OR51E1  | olfactory receptor, family 51, subfamily E, member 1  | 0.27  | CAGTTGATGCTTGTCTGTA   | NM_152430:    | NM_152430;                                       |
| 143503 | OR51E1  | olfactory receptor, family 51, subfamily E, member 1  | -0.19 | CTCATATCTGTTATTCTTAA  | NM_152430:    | NM_152430;                                       |
| 81285  | OR51E2  | olfactory receptor, family 51, subfamily E, member 2  | 0.70  | ACGGTGTGCTGATGTTCAA   | NM_030774:    | NM_030774;                                       |
| 81285  | OR51E2  | olfactory receptor, family 51, subfamily E, member 2  | -0.04 | TGGCTGGAATGTAACCTAAA  | NM_030774:    | NM_030774;                                       |
| 23538  | OR52A1  | olfactory receptor, family 52, subfamily A, member 1  | -0.31 | CACCAGCTGTGATTCAGATA  | NM_012375:    | NM_012375;                                       |
| 23538  | OR52A1  | olfactory receptor, family 52, subfamily A, member 1  | -0.88 | CAGAAGGAGGCTAGGTTAAA  | NM_012375:    | NM_012375;                                       |
| 143496 | OR52B4  | olfactory receptor, family 52, subfamily B, member 4  | 1.02  | ATGCATGTAATGACATTCGAA | NM_001005161: | NM_001005161;                                    |
| 143496 | OR52B4  | olfactory receptor, family 52, subfamily B, member 4  | 1.55  | TCCCATTTATGGGATCAA    | NM_001005161: | NM_001005161;                                    |
| 390067 | OR52H1  | olfactory receptor, family 52, subfamily H, member 1  | -7.01 | TACCACCCTTCTGACTCCCAA | NM_001005289: | NM_001005289;                                    |
| 390067 | OR52H1  | olfactory receptor, family 52, subfamily H, member 1  | 0.20  | CAGATCAGAGATAAGGTTATA | NM_001005289: | NM_001005289;                                    |

|        |           |                                                                  |       |                        |               |                                                              |
|--------|-----------|------------------------------------------------------------------|-------|------------------------|---------------|--------------------------------------------------------------|
| 387748 | OR56B1    | olfactory receptor, family 56, subfamily B, member 1             | -0.67 | AAGTCTTATTACTGTGCATA   | NM_001005180: | NM_001005180:                                                |
| 387748 | OR56B1    | olfactory receptor, family 56, subfamily B, member 1             | -4.58 | ACCCCTCTCGTATCCATCAA   | NM_001005180: | NM_001005180:                                                |
| 196335 | OR56B4    | olfactory receptor, family 56, subfamily B, member 4             | -0.09 | ATGGCAGTAGACAGATACATA  | NM_001005181: | NM_001005181:                                                |
| 196335 | OR56B4    | olfactory receptor, family 56, subfamily B, member 4             | -0.56 | CTCATCAATACCATTCAA     | NM_001005181: | NM_001005181:                                                |
| 10798  | OR511     | olfactory receptor, family 5, subfamily I, member 1              | 0.19  | CTGAGAAGTCTTAAGATCAA   | NM_006637:    | NM_006637:                                                   |
| 10798  | OR511     | olfactory receptor, family 5, subfamily I, member 1              | -1.67 | GCGGTGATGCTCTTGTCATA   | NM_006637:    | NM_006637:                                                   |
| 26338  | OR5L2     | olfactory receptor, family 5, subfamily L, member 2              | 1.15  | AACAGTGGAGATGTTGACAAA  | XM_372387:    | NM_001004739:                                                |
| 26338  | OR5L2     | olfactory receptor, family 5, subfamily L, member 2              | 0.06  | CACCACATCCTGAAGATACA   | XM_372387:    | NM_001004739:                                                |
| 120065 | OR5P2     | olfactory receptor, family 5, subfamily P, member 2              | 0.04  | CCACTGCTTTATTCAACCAAAA | NM_153444:    | NM_153444:                                                   |
| 120065 | OR5P2     | olfactory receptor, family 5, subfamily P, member 2              | 0.47  | CCAGCTACTCTTAGTAGTTTA  | NM_153444:    | NM_153444:                                                   |
| 120066 | OR5P3     | olfactory receptor, family 5, subfamily P, member 3              | 1.00  | ATGGGTAATATCAGCATAATT  | NM_153445:    | NM_153445:                                                   |
| 120066 | OR5P3     | olfactory receptor, family 5, subfamily P, member 3              | 0.12  | CTGCATCATCTTAGTGGGCAT  | NM_153445:    | NM_153445:                                                   |
| 81696  | OR5V1     | olfactory receptor, family 5, subfamily V, member 1              | 0.40  | AAGTTCTATGCAATCAATTA   | NM_030876:    | NM_030876:                                                   |
| 81696  | OR5V1     | olfactory receptor, family 5, subfamily V, member 1              | 1.18  | CACCATTCTTCTTGACTTA    | NM_030876:    | NM_030876:                                                   |
| 8590   | OR6A2     | olfactory receptor, family 6, subfamily A, member 2              | 1.57  | ACGTGGTATTCGACCAATATA  | NM_003696:    | NM_003696:                                                   |
| 8590   | OR6A2     | olfactory receptor, family 6, subfamily A, member 2              | -0.86 | TACGTGGTATTCGACCAATATA | NM_003696:    | NM_003696:                                                   |
| 389090 | OR6B2     | olfactory receptor, family 6, subfamily B, member 2              | -6.66 | TGGGTCAAACTTCACACTAA   | NM_001005853: | NM_001005853:                                                |
| 389090 | OR6B2     | olfactory receptor, family 6, subfamily B, member 2              | -0.62 | CACGCCAATAATTAACCCCTT  | NM_001005853: | NM_001005853:                                                |
| 150681 | OR6B3     | olfactory receptor, family 6, subfamily B, member 3              | 0.47  | CTGGAACCTCATCTCCAATA   | NM_173351:    | NM_173351:                                                   |
| 150681 | OR6B3     | olfactory receptor, family 6, subfamily B, member 3              | 0.19  | CCTGAGGAATAAGGAATTTAA  | NM_173351:    | NM_173351:                                                   |
| 89883  | OR6W1P    | olfactory receptor, family 6, subfamily W, member 1 pseudogene   | -4.44 | CTCCTGGTCCCTCATCTTGAT  | NM_033519:    | NR_002140:                                                   |
| 89883  | OR6W1P    | olfactory receptor, family 6, subfamily W, member 1 pseudogene   | 0.84  | CTGGAGCTCCTCACTCTTTT   | NM_033519:    | NR_002140:                                                   |
| 26333  | OR7A17    | olfactory receptor, family 7, subfamily A, member 17             | -0.59 | CCCTGAATTCCTGTCCACAAA  | NM_030901:    | NM_030901:                                                   |
| 26333  | OR7A17    | olfactory receptor, family 7, subfamily A, member 17             | -0.03 | CGGGCTAGGTGTGACCTTA    | NM_030901:    | NM_030901:                                                   |
| 26659  | OR7A5     | olfactory receptor, family 7, subfamily A, member 5              | 0.61  | AAGTTAGTGCCCATATATATA  | NM_017506:    | NM_017506:                                                   |
| 26659  | OR7A5     | olfactory receptor, family 7, subfamily A, member 5              | -1.24 | ACAGTCAGAGATGACCTTAAA  | NM_017506:    | NM_017506:                                                   |
| 26658  | OR7C2     | olfactory receptor, family 7, subfamily C, member 2              | 1.15  | CTGCAGTTACACCACCTTCTA  | NM_012377:    | NM_012377:                                                   |
| 26658  | OR7C2     | olfactory receptor, family 7, subfamily C, member 2              | -1.54 | CTGGTGAATATCCAACACAAA  | NM_012377:    | NM_012377:                                                   |
| 162998 | OR7D2     | olfactory receptor, family 7, subfamily D, member 2              | 0.74  | CAGCACGTTGATATACCTTTT  | NM_175883:    | NM_175883:                                                   |
| 162998 | OR7D2     | olfactory receptor, family 7, subfamily D, member 2              | 0.24  | ACCAATTACTGCAATAGTGAA  | NM_175883:    | NM_175883:                                                   |
| 125958 | OR7D4     | olfactory receptor, family 7, subfamily D, member 4              | -4.16 | CTGCTTAACACCTCCTCTCAA  | NM_001005191: | NM_001005191:                                                |
| 125958 | OR7D4     | olfactory receptor, family 7, subfamily D, member 4              | -0.36 | ACGGAGCAAAGACATCTCCTA  | NM_001005191: | NM_001005191:                                                |
| 125958 | OR7D4     | olfactory receptor, family 7, subfamily D, member 4              | -2.06 | CTCAGATTGCTCCTCCTTAA   | NM_001005191: | NM_001005191:                                                |
| 79315  | OR7E91P   | (olfactory receptor, family 7, subfamily E, member 91 pseudogene | 0.02  | AAGAAAGGGCAAGCACATTTA  | NM_145242:    | NR_002185:                                                   |
| 79315  | OR7E91P   | (olfactory receptor, family 7, subfamily E, member 91 pseudogene | 1.80  | TCCGCCAGCATACAAGCTTAA  | NM_145242:    | NR_002185:                                                   |
| 79315  | OR7E91P   | (olfactory receptor, family 7, subfamily E, member 91 pseudogene | -0.37 | AAGAAAGGGCAAGCACATTTA  | NM_145242:    | NR_002185:                                                   |
| 79315  | OR7E91P   | (olfactory receptor, family 7, subfamily E, member 91 pseudogene | 0.79  | TCCGCCAGCATACAAGCTTAA  | NM_145242:    | NR_002185:                                                   |
| 26493  | OR8B8     | olfactory receptor, family 8, subfamily B, member 8              | 0.65  | CAAGGTGTCTCCCTATTTCTA  | NM_012378:    | NM_012378:                                                   |
| 26493  | OR8B8     | olfactory receptor, family 8, subfamily B, member 8              | -0.56 | GAGCTTTGTCTTAAAGAAGAA  | NM_012378:    | NM_012378:                                                   |
| 283159 | OR8D1     | olfactory receptor, family 8, subfamily D, member 1              | 1.68  | AAAGAAGAATACATCCTTTA   | NM_001002917: | NM_001002917:                                                |
| 283159 | OR8D1     | olfactory receptor, family 8, subfamily D, member 1              | 0.77  | CAGTTTGTCTTAGATGGTTTA  | NM_001002917: | NM_001002917:                                                |
| 283160 | OR8D2     | olfactory receptor, family 8, subfamily D, member 2              | 1.78  | CAGGGCTGTGCCATAATGAT   | NM_001002918: | NM_001002918:                                                |
| 283160 | OR8D2     | olfactory receptor, family 8, subfamily D, member 2              | 1.35  | TGGGTCTATAACACTCATGTA  | NM_001002918: | NM_001002918:                                                |
| 219865 | OR8G5     | olfactory receptor, family 8, subfamily G, member 5              | -1.41 | CTGTTCTAGTACTTACATTTA  | NM_001005198: | NM_001005198:                                                |
| 219865 | OR8G5     | olfactory receptor, family 8, subfamily G, member 5              | -2.60 | CAAGGGATCAGTTTCCCTACAA | NM_001005198: | NM_001005198:                                                |
| 23594  | OR6L      | origin recognition complex, subunit 6 homolog-like (yeast)       | -0.17 | ATGCAAGATTCTAAAGCTGAA  | NM_014321:    | NM_014321:                                                   |
| 23594  | OR6L      | origin recognition complex, subunit 6 homolog-like (yeast)       | -0.15 | CAGGATTATGAAGAATGGAAA  | NM_014321:    | NM_014321:                                                   |
| 84418  | ORF1-FL49 | putative nuclear protein ORF1-FL49                               | 0.76  | CGCGCTGATGTTTCAATATA   | NM_032412:    | NM_032412:                                                   |
| 84418  | ORF1-FL49 | putative nuclear protein ORF1-FL49                               | 1.10  | CAGGTTCCAGCCCGACCGTTA  | NM_032412:    | NM_032412:                                                   |
| 5007   | OSBP      | oxysterol binding protein                                        | 0.41  | CCCGCTAATGAAGAAGTTTA   | NM_002556:    | NM_002556:                                                   |
| 5007   | OSBP      | oxysterol binding protein                                        | 0.28  | CGAAGGTTAGTGTATTCCCA   | NM_002556:    | NM_002556:                                                   |
| 126014 | OSCAR     | osteoclast-associated receptor                                   | -0.37 | AAGGTAGTAGTGAGACGTGAA  | NM_130771:    | NM_130771;NM_133168;NM_133169;NM_206817;NM_206818:           |
| 126014 | OSCAR     | osteoclast-associated receptor                                   | -0.25 | CCCAGCTTCATACCACCTTAA  | NM_130771:    | NM_206818:                                                   |
| 55644  | OSGEP     | O-sialoglycoprotein endopeptidase                                | 0.29  | CCAGGATGACTCAGCAATAAA  | NM_017807:    | NM_017807:                                                   |
| 55644  | OSGEP     | O-sialoglycoprotein endopeptidase                                | -0.87 | TAGCAAAGCTATAGACTCCAA  | NM_017807:    | NM_017807:                                                   |
| 64172  | OSGEP_L1  | (O-sialoglycoprotein endopeptidase-like 1                        | 0.17  | TAAAGTAGTATTAAAGTTAA   | NM_022353:    | NM_022353:                                                   |
| 64172  | OSGEP_L1  | (O-sialoglycoprotein endopeptidase-like 1                        | -5.05 | CAGAGAGACTTGTACTCTCAA  | NM_022353:    | NM_022353:                                                   |
| 5008   | OSM       | oncostatin M                                                     | -0.79 | TGGAGGACATGACTAATTTA   | NM_020530:    | NM_020530:                                                   |
| 5008   | OSM       | oncostatin M                                                     | -2.00 | CTGACGTAAAGTGGATATTTA  | NM_020530:    | NM_020530:                                                   |
| 9180   | OSMR      | oncostatin M receptor                                            | -0.51 | TAGCTTAATCTAATATATA    | NM_003999:    | NM_003999:                                                   |
| 9180   | OSMR      | oncostatin M receptor                                            | 0.53  | TAGACTTACCCTTGAACGGATA | NM_003999:    | NM_003999:                                                   |
| 5009   | OTC       | ornithine carbamoyltransferase                                   | 0.53  | TACGTCTTAACCTTGGCTTAA  | NM_000531:    | NM_000531:                                                   |
| 5009   | OTC       | ornithine carbamoyltransferase                                   | 0.76  | AGCATCCATCCCAATTAATCAA | NM_000531:    | NM_000531:                                                   |
| 158800 | Otex      | paired-like homeobox protein OTEX                                | -1.33 | CGGGTTGGTTAAGAATAAAA   | NM_139282:    | NM_139282:                                                   |
| 158800 | Otex      | paired-like homeobox protein OTEX                                | -5.30 | TGCACCTATGTTATCAATAAAA | NM_139282:    | NM_139282:                                                   |
| 9381   | OTOF      | otofelin                                                         | 0.69  | CAGGATTGAAGCTTTAGTGAA  | NM_004802:    | NM_194248;NM_004802;NM_194323;NM_194322:                     |
| 9381   | OTOF      | otofelin                                                         | -1.66 | CGGTACAAGTGGCTCATCAT   | NM_004802:    | NM_194248;NM_004802;NM_194323;NM_194322:                     |
| 5013   | OTX1      | orthodenticle homolog 1 (Drosophila)                             | 0.77  | CACCCAGGAACAGAACTTTA   | NM_014562:    | NM_014562:                                                   |
| 5013   | OTX1      | orthodenticle homolog 1 (Drosophila)                             | -0.24 | TCCGTTCCAGGACCACCTTAA  | NM_014562:    | NM_014562:                                                   |
| 341350 | OVCH1     | ovo-chymase 1                                                    | 0.90  | TACGAGGTGCAATTTGGTATA  | NM_183378:    | NM_183378:                                                   |
| 341350 | OVCH1     | ovo-chymase 1                                                    | -2.84 | CAGATTCAAGTGCATGTGTTA  | NM_183378:    | NM_183378:                                                   |
| 341277 | OVCH2     | ovo-chymase 2                                                    | -4.11 | CCACAGTTACCTGTCAATGTA  | NM_198185:    | NM_198185:                                                   |
| 341277 | OVCH2     | ovo-chymase 2                                                    | -0.12 | CCACATTTCTCCCAAGAGAAA  | NM_198185:    | NM_198185:                                                   |
| 5017   | OVOL1     | ovo-like 1 (Drosophila)                                          | -0.46 | AACCTTCCCTCAACTATTTAA  | NM_004561:    | NM_004561:                                                   |
| 5017   | OVOL1     | ovo-like 1 (Drosophila)                                          | -0.40 | CCAGTGGACATCAGAGTCAA   | NM_004561:    | NM_004561:                                                   |
| 165140 | OxER1     | oxoeicosanoid (OXE) receptor 1                                   | 1.13  | CCAGCTGATAGTCCAATCAT   | NM_148962:    | NM_148962:                                                   |
| 165140 | OxER1     | oxoeicosanoid (OXE) receptor 1                                   | -8.31 | COGGTGGAGGAGACAGGCAA   | NM_148962:    | NM_148962:                                                   |
| 27199  | OxGR1     | oxoglutarate (alpha-ketoglutarate) receptor 1                    | -0.84 | CACCAGTTCGGATGAACCTCAA | NM_080818:    | NM_080818:                                                   |
| 27199  | OxGR1     | oxoglutarate (alpha-ketoglutarate) receptor 1                    | -5.35 | CGCTACTGTGTGATCATTCA   | NM_080818:    | NM_080818:                                                   |
| 92106  | OxNAD1    | oxidoreductase NAD-binding domain containing 1                   | 0.42  | ATGCAGTTTGCATGTTACAAA  | NM_138381:    | NM_138381:                                                   |
| 92106  | OxNAD1    | oxidoreductase NAD-binding domain containing 1                   | -0.99 | TACCAGGCAACTCGTTTAA    | NM_138381:    | NM_138381:                                                   |
| 54995  | OxSM      | 3-oxoacyl-ACP synthase, mitochondrial                            | 0.13  | CAGCATTGATATAAATCCTAA  | NM_017897:    | NM_017897:                                                   |
| 54995  | OxSM      | 3-oxoacyl-ACP synthase, mitochondrial                            | -0.15 | CAGGTGATGATGATGATATA   | NM_017897:    | NM_017897:                                                   |
| 9943   | OxSR1     | oxidative-stress responsive 1                                    | -0.06 | CTGGAGTAGGACTAATCATATA | NM_005109:    | NM_005109:                                                   |
| 9943   | OxSR1     | oxidative-stress responsive 1                                    | -0.87 | TAGGACTAAGTATAGCACAAA  | NM_005109:    | NM_005109:                                                   |
| 5021   | OxTR      | oxytocin receptor                                                | -1.88 | ATGGATCAGCTAGCTGTCTA   | NM_000916:    | NM_000916:                                                   |
| 5021   | OxTR      | oxytocin receptor                                                | 0.49  | GACAATGATATGCAAGTGCAA  | NM_000916:    | NM_000916:                                                   |
| 5023   | P2RX1     | purinergic receptor P2X, ligand-gated ion channel, 1             | 0.15  | ACCATAGGTGACTAAATATAA  | NM_002558:    | NM_002558:                                                   |
| 5023   | P2RX1     | purinergic receptor P2X, ligand-gated ion channel, 1             | 0.57  | CCGCATGGTGTGGTGGCTGAA  | NM_002558:    | NM_002558:                                                   |
| 22953  | P2RX2     | purinergic receptor P2X, ligand-gated ion channel, 2             | 0.08  | CACAGGGTGTAAACCTTGAA   | NM_012226:    | NM_016318;NM_174873;NM_174872;NM_170682;NM_170683;NM_012226: |
| 22953  | P2RX2     | purinergic receptor P2X, ligand-gated ion channel, 2             | -2.63 | CACAACACTACTCAGTCCAATA | NM_012226:    | NM_170683;NM_012226:                                         |
| 5024   | P2RX3     | purinergic receptor P2X, ligand-gated ion channel, 3             | 0.01  | ACGGGAATGCTGGCAAGTTCA  | NM_002559:    | NM_002559:                                                   |
| 5024   | P2RX3     | purinergic receptor P2X, ligand-gated ion channel, 3             | -1.94 | CTGCACAGCGTTTCTGAGAAA  | NM_002559:    | NM_002559:                                                   |



|        |                                             |                                                                                                                                                                        |        |                        |            |                                                              |
|--------|---------------------------------------------|------------------------------------------------------------------------------------------------------------------------------------------------------------------------|--------|------------------------|------------|--------------------------------------------------------------|
| 5025   | P2RX4                                       | purinergic receptor P2X, ligand-gated ion channel, 4                                                                                                                   | 1.08   | CGGGACGTTGAGCACACGTA   | NM_002560: | NM_175568:NM_175567:NM_002560:                               |
| 5025   | P2RX4                                       | purinergic receptor P2X, ligand-gated ion channel, 4                                                                                                                   | -0.54  | TCGTGCATTTATGATGCTAAA  | NM_002560: | NM_175568:NM_175567:NM_002560:                               |
| 5026   | P2RX5                                       | purinergic receptor P2X, ligand-gated ion channel, 5                                                                                                                   | -0.25  | CCCTGTAGAGTTCCTAGATTA  | NM_002561: | NM_002561:NM_175080:                                         |
| 5026   | P2RX5                                       | purinergic receptor P2X, ligand-gated ion channel, 5                                                                                                                   | -1.47  | CGCTTTGACGTGATGGTGAA   | NM_002561: | NM_002561:NM_175080:                                         |
| 5027   | P2RX7                                       | purinergic receptor P2X, ligand-gated ion channel, 7                                                                                                                   | 1.32   | CTAGGATAATGTCCAACTAAA  | NM_002562: | NM_002562:NM_177427:                                         |
| 5027   | P2RX7                                       | purinergic receptor P2X, ligand-gated ion channel, 7                                                                                                                   | -0.02  | AAAGATCTACATGAATGCAAA  | NM_002562: | NM_002562:NM_177427:                                         |
| 9127   | P2RXL1                                      | purinergic receptor P2X-like 1, orphan receptor                                                                                                                        | 0.08   | CAGGGCTAAGTTGGTGATCAT  | NM_005446: | NM_005446:                                                   |
| 9127   | P2RXL1                                      | purinergic receptor P2X-like 1, orphan receptor                                                                                                                        | 0.11   | CTGCTGATGTGGATAGAGAA   | NM_005446: | NM_005446:                                                   |
| 5028   | P2RY1                                       | purinergic receptor P2Y, G-protein coupled, 1                                                                                                                          | 0.01   | AAGCCTGCATATATTATCGTA  | NM_002563: | NM_002563:                                                   |
| 5028   | P2RY1                                       | purinergic receptor P2Y, G-protein coupled, 1                                                                                                                          | -0.06  | ATCGATTTACCTGGTAATCAT  | NM_002563: | NM_002563:                                                   |
| 27334  | P2RY10                                      | purinergic receptor P2Y, G-protein coupled, 10                                                                                                                         | -1.10  | AAGTTGAATGATTTACCTTAA  | NM_014499: | NM_014499:NM_198333:                                         |
| 27334  | P2RY10                                      | purinergic receptor P2Y, G-protein coupled, 10                                                                                                                         | 1.75   | CTCCATCATATTAACATTTA   | NM_014499: | NM_014499:NM_198333:                                         |
| 5032   | P2RY11                                      | purinergic receptor P2Y, G-protein coupled, 11                                                                                                                         | -0.95  | ACCCCTAGGTGTGGCTGGAGAA | NM_002566: | NM_002566:                                                   |
| 5032   | P2RY11                                      | purinergic receptor P2Y, G-protein coupled, 11                                                                                                                         | 0.42   | CCCGCTGGCCCGCTACCTCTA  | NM_002566: | NM_002566:                                                   |
| 64805  | P2RY12                                      | purinergic receptor P2Y, G-protein coupled, 12                                                                                                                         | -2.99  | CAGGTCGAGATTACAAGAGCA  | NM_022788: | NM_022788:                                                   |
| 64805  | P2RY12                                      | purinergic receptor P2Y, G-protein coupled, 12                                                                                                                         | 0.67   | CCGGAGTAAATCAAACTTTAT  | NM_022788: | NM_022788:NM_176876:                                         |
| 53829  | P2RY13                                      | purinergic receptor P2Y, G-protein coupled, 13                                                                                                                         | 0.87   | AAGACTGACTGTAGACTGCAA  | NM_023914: | NM_176894:NM_023914:                                         |
| 53829  | P2RY13                                      | purinergic receptor P2Y, G-protein coupled, 13                                                                                                                         | 0.50   | CAACTGTTTATGCTAAAGAA   | NM_023914: | NM_176894:NM_023914:                                         |
| 9934   | P2RY14                                      | purinergic receptor P2Y, G-protein coupled, 14                                                                                                                         | 0.90   | ACCCATCAGTAATTTCTCTAA  | NM_014879: | NM_014879:                                                   |
| 9934   | P2RY14                                      | purinergic receptor P2Y, G-protein coupled, 14                                                                                                                         | -0.76  | TACAAAGACTTACGTCATTTA  | NM_014879: | NM_014879:                                                   |
| 5029   | P2RY2                                       | purinergic receptor P2Y, G-protein coupled, 2                                                                                                                          | -1.08  | CAGTGTGAGGCTGTAACCTAT  | NM_002564: | NM_176072:NM_176071:NM_002564:                               |
| 5029   | P2RY2                                       | purinergic receptor P2Y, G-protein coupled, 2                                                                                                                          | 0.69   | CTGGAATGGTACACCACATA   | NM_002564: | NM_176072:NM_176071:NM_002564:                               |
| 5030   | P2RY4                                       | pyrimidinergic receptor P2Y, G-protein coupled, 4                                                                                                                      | -6.45  | CAGATAGATTGTACACCGGAA  | NM_002565: | NM_002565:                                                   |
| 5030   | P2RY4                                       | pyrimidinergic receptor P2Y, G-protein coupled, 4                                                                                                                      | -0.31  | CCCAATAGTGATACCTGGTAA  | NM_002565: | NM_002565:                                                   |
| 10161  | P2RY5                                       | purinergic receptor P2Y, G-protein coupled, 5                                                                                                                          | 0.46   | CGAAATGAACTCAAACTTA    | NM_005767: | NM_005767:                                                   |
| 10161  | P2RY5                                       | purinergic receptor P2Y, G-protein coupled, 5                                                                                                                          | -0.12  | CTGCTCCTCAAAGTCCGAAA   | NM_005767: | NM_005767:                                                   |
| 5031   | P2RY6                                       | pyrimidinergic receptor P2Y, G-protein coupled, 6                                                                                                                      | 1.42   | CACGGCCGTGACACCCTAAA   | NM_176797: | NM_176797:NM_176796:NM_004154:NM_176798:                     |
| 5031   | P2RY6                                       | pyrimidinergic receptor P2Y, G-protein coupled, 6                                                                                                                      | 1.56   | CCACATGAGCTCCTACAGAAA  | NM_176797: | NM_176797:NM_176796:NM_004154:NM_176798:                     |
| 286530 | P2RY8                                       | purinergic receptor P2Y, G-protein coupled, 8                                                                                                                          | 0.18   | CTGGATTATTAAGCACCCCTAA | NM_178129: | NM_178129:                                                   |
| 286530 | P2RY8                                       | purinergic receptor P2Y, G-protein coupled, 8                                                                                                                          | -0.02  | GTCCGTCATCTTCATGATCAA  | NM_178129: | NM_178129:                                                   |
| 5033   | P4HA1                                       | procollagen-proline, 2-oxoglutarate 4-dioxygenase (proline 4-hydroxylase)                                                                                              | 0.41   | CAGGTTGGTAATATTGGCATT  | NM_000917: | NM_000917:NM_001017962:                                      |
| 5033   | P4HA1                                       | procollagen-proline, 2-oxoglutarate 4-dioxygenase (proline 4-hydroxylase)                                                                                              | 0.03   | GCAAAATCATCATATTGCATAA | NM_000917: | NM_000917:NM_001017962:                                      |
| 8974   | P4HA2                                       | procollagen-proline, 2-oxoglutarate 4-dioxygenase (proline 4-hydroxylase)                                                                                              | 0.05   | ATCGTGTGGCTACTTCTTTAA  | NM_004199: | NM_004199:                                                   |
| 8974   | P4HA2                                       | procollagen-proline, 2-oxoglutarate 4-dioxygenase (proline 4-hydroxylase)                                                                                              | -0.12  | GAGGATCAAGGAGATCGGCAAA | NM_004199: | NM_001017974:NM_004199:NM_001017973:                         |
| 283208 | P4HA3                                       | procollagen-proline, 2-oxoglutarate 4-dioxygenase (proline 4-hydroxylase)                                                                                              | 2.10   | CCGATGATGAGTGGTCACTTAT | NM_182904: | NM_182904:                                                   |
| 283208 | P4HA3                                       | procollagen-proline, 2-oxoglutarate 4-dioxygenase (proline 4-hydroxylase)                                                                                              | -4.81  | CAGAGTAGGATGCACAGTACA  | NM_182904: | NM_182904:                                                   |
| 5034   | P4HB                                        | procollagen-proline, 2-oxoglutarate 4-dioxygenase (proline 4-hydroxylase)                                                                                              | -29.74 | AAGATGAACTGTAATACGCAA  | NM_000918: | NM_000918:                                                   |
| 5034   | P4HB                                        | procollagen-proline, 2-oxoglutarate 4-dioxygenase (proline 4-hydroxylase)                                                                                              | -1.84  | CAGGACGCTCATGTTACAAA   | NM_000918: | NM_000918:                                                   |
| 63970  | P53AIP1                                     | p53-regulated apoptosis-inducing protein 1                                                                                                                             | 1.62   | ATGATTTGGTAAATAACAA    | NM_022112: | NM_022112:                                                   |
| 63970  | P53AIP1                                     | p53-regulated apoptosis-inducing protein 1                                                                                                                             | -0.78  | CAGGTGTGTGATAAATCTACTA | NM_022112: | NM_022112:                                                   |
| 26471  | P8                                          | p8 protein (candidate of metastasis 1)                                                                                                                                 | 1.01   | CGAGAGAACTGGTGACCCAA   | NM_012385: | NM_012385:                                                   |
| 26471  | P8                                          | p8 protein (candidate of metastasis 1)                                                                                                                                 | 0.09   | CTGGATGAATCTGACCTCTAT  | NM_012385: | NM_012385:                                                   |
| 5036   | PA2G4                                       | proliferation-associated 2G4, 38kDa                                                                                                                                    | 2.05   | ACGGAAGACTCTTTAAACGA   | NM_006191: | NM_006191:                                                   |
| 5036   | PA2G4                                       | proliferation-associated 2G4, 38kDa                                                                                                                                    | 0.02   | CCCCTCCCTCCACACACAAA   | NM_006191: | NM_006191:                                                   |
| 8106   | PABPN1                                      | poly(A) binding protein, nuclear 1                                                                                                                                     | 0.63   | CTGGGTGCAGGTACACCCAAA  | NM_004643: | NM_004643:                                                   |
| 8106   | PABPN1                                      | poly(A) binding protein, nuclear 1                                                                                                                                     | 1.19   | CGTGAGACTGCGAATATAAA   | NM_004643: | NM_004643:                                                   |
| 135138 | PACRG                                       | PARK2 co-regulated                                                                                                                                                     | 0.64   | TTCAGTTGATAGCAATAAAA   | NM_152410: | NM_152410:                                                   |
| 135138 | PACRG                                       | PARK2 co-regulated                                                                                                                                                     | 0.09   | ACAGCTCATTATCCGATAAAA  | NM_152410: | NM_152410:                                                   |
| 29993  | PACSN1                                      | protein kinase C and casein kinase substrate in neurons 1                                                                                                              | 0.18   | CAGCAGTACATCCATGTGTA   | NM_020804: | NM_020804:                                                   |
| 29993  | PACSN1                                      | protein kinase C and casein kinase substrate in neurons 1                                                                                                              | -1.08  | CGCCATAGAGTCCAGACATA   | NM_020804: | NM_020804:                                                   |
| 11252  | PACSN2 (pr)                                 | protein kinase C and casein kinase substrate in neurons 2                                                                                                              | -1.78  | CACCCTTAATGTCCCGAGCAA  | NM_007229: | NM_007229:                                                   |
| 11252  | PACSN2 (pr)                                 | protein kinase C and casein kinase substrate in neurons 2                                                                                                              | 0.01   | GAACTTTACATAGAACCTTA   | NM_007229: | NM_007229:                                                   |
| 29763  | PACSN3 (pr)                                 | protein kinase C and casein kinase substrate in neurons 3                                                                                                              | 0.65   | AAGGATATGCTGCTCACCTTA  | NM_016223: | NM_016223:                                                   |
| 29763  | PACSN3 (pr)                                 | protein kinase C and casein kinase substrate in neurons 3                                                                                                              | 0.00   | CAGAGSACATCAGCCGGAAA   | NM_016223: | NM_016223:                                                   |
| 5047   | PAEP                                        | progesterone-associated endometrial protein (placental protein 14, pre)                                                                                                | -0.08  | ATGGTACTTGTGGACTTGAA   | NM_002571: | NM_002571:NM_001018049:                                      |
| 5047   | PAEP                                        | progesterone-associated endometrial protein (placental protein 14, pre)                                                                                                | 1.68   | AAAGAAAGTTCAGATCAACTA  | NM_002571: | NM_002571:NM_001018049:                                      |
| 5050   | PAFAH1B3 (p)                                | platelet-activating factor acetylhydrolase, isoform Ib, gamma subunit 2                                                                                                | 0.03   | CCGATCCCCACAACTTAAA    | NM_002573: | NM_002573:                                                   |
| 5050   | PAFAH1B3 (p)                                | platelet-activating factor acetylhydrolase, isoform Ib, gamma subunit 2                                                                                                | -2.88  | TCCACCTACCTCCTAAGTGAA  | NM_002573: | NM_002573:                                                   |
| 5051   | PAFAH2                                      | platelet-activating factor acetylhydrolase 2, 40kDa                                                                                                                    | -0.13  | GAGAAGTAGTTTGGTCAAGCTA | NM_000437: | NM_000437:                                                   |
| 5051   | PAFAH2                                      | platelet-activating factor acetylhydrolase 2, 40kDa                                                                                                                    | 0.25   | CCGAGGACCTGTGTTCTTTA   | NM_000437: | NM_000437:                                                   |
| 55824  | PAG1                                        | phosphoprotein associated with glycosphingolipid microdomains 1                                                                                                        | -2.96  | TAGGTATGATCTCTAAAGTAA  | NM_018440: | NM_018440:                                                   |
| 55824  | PAG1                                        | phosphoprotein associated with glycosphingolipid microdomains 1                                                                                                        | -1.71  | CACGACCGAGTAACTAACAA   | NM_018440: | NM_018440:                                                   |
| 5053   | PAH                                         | phenylalanine hydroxylase                                                                                                                                              | 0.00   | TGGGCTTAATAATAACTGTA   | NM_000277: | NM_000277:                                                   |
| 5053   | PAH                                         | phenylalanine hydroxylase                                                                                                                                              | 0.94   | GTCCGATTTCAAGATTTAA    | NM_000277: | NM_000277:                                                   |
| 10606  | PAICS                                       | phosphoribosylaminoimidazole carboxylase, phosphoribosylaminoimidazole carboxylase, phosphoribosylaminoimidazole carboxylase, phosphoribosylaminoimidazole carboxylase | 0.87   | CCCAGGACTCTCAACAATAA   | NM_006452: | NM_006452:                                                   |
| 10606  | PAICS                                       | phosphoribosylaminoimidazole carboxylase, phosphoribosylaminoimidazole carboxylase, phosphoribosylaminoimidazole carboxylase, phosphoribosylaminoimidazole carboxylase | 0.00   | CTGACTAACAGGGACTATAA   | NM_006452: | NM_006452:                                                   |
| 5058   | PAK1                                        | p21/Cdc42/Rac1-activated kinase 1 (STE20 homolog, yeast)                                                                                                               | -1.10  | TCCACTGATTGCTGCAGCTAA  | NM_002576: | NM_002576:                                                   |
| 5058   | PAK1                                        | p21/Cdc42/Rac1-activated kinase 1 (STE20 homolog, yeast)                                                                                                               | 0.52   | TGAAAGAGAACTGCAACTGAA  | NM_002576: | NM_002576:                                                   |
| 5062   | PAK2                                        | p21 (CDKN1A)-activated kinase 2                                                                                                                                        | -4.50  | ACGAGTAATTGTGAAGCATAA  | NM_002577: | NM_002577:                                                   |
| 5062   | PAK2                                        | p21 (CDKN1A)-activated kinase 2                                                                                                                                        | 0.22   | CGCGAGCCGGATCATACGAAA  | NM_002577: | NM_002577:                                                   |
| 5063   | PAK3                                        | p21 (CDKN1A)-activated kinase 3                                                                                                                                        | 0.28   | CAAGAAGGAATTAATTTATA   | NM_002578: | NM_002578:                                                   |
| 5063   | PAK3                                        | p21 (CDKN1A)-activated kinase 3                                                                                                                                        | 0.79   | TTCAGTACTTTGTACAGGAA   | NM_002578: | NM_002578:                                                   |
| 10298  | PAK4 (p21(Ci p21(CDKN1A)-activated kinase 4 |                                                                                                                                                                        | -2.75  | CGGCGCCGAGCCGATGAGTAA  | NM_005884: | NM_001014831:NM_005884:NM_001014833:NM_001014835:            |
| 10298  | PAK4 (p21(Ci p21(CDKN1A)-activated kinase 4 |                                                                                                                                                                        | 0.73   | CTGGACAACCTCATCAAGATT  | NM_005884: | NM_001014831:NM_005884:NM_001014833:NM_001014835:            |
| 56924  | PAK6                                        | p21(CDKN1A)-activated kinase 6                                                                                                                                         | -0.23  | CGAAGGACCATGTTCCGCAA   | NM_020168: | NM_020168:                                                   |
| 56924  | PAK6                                        | p21(CDKN1A)-activated kinase 6                                                                                                                                         | 2.03   | CTGTGTTACCTTCAAGTTTA   | NM_020168: | NM_020168:                                                   |
| 57144  | PAK7                                        | p21(CDKN1A)-activated kinase 7                                                                                                                                         | -0.04  | ATGATCTGGATCCGTATTATA  | NM_177990: | NM_020341:NM_177990:                                         |
| 57144  | PAK7                                        | p21(CDKN1A)-activated kinase 7                                                                                                                                         | -0.17  | ATGGTGTGCAAGTTTCATTA   | NM_177990: | NM_020341:NM_177990:                                         |
| 5066   | PAM                                         | peptidylglycine alpha-amidating monoxygenase                                                                                                                           | 0.95   | TTGGAACATCGATCAGTTAAA  | NM_000919: | NM_138821:NM_138822:NM_138766:NM_000919:                     |
| 5066   | PAM                                         | peptidylglycine alpha-amidating monoxygenase                                                                                                                           | 1.08   | CCAGATATGTTGAGAACCCATA | NM_000919: | NM_138821:NM_138822:NM_138766:NM_000919:                     |
| 255967 | PAN3                                        | PABP1-dependent poly A-specific ribonuclease subunit PAN3                                                                                                              | 1.43   | TACCTATCTTTGATCACTGAA  | NM_175854: | NM_175854:                                                   |
| 255967 | PAN3                                        | PABP1-dependent poly A-specific ribonuclease subunit PAN3                                                                                                              | 0.01   | CCGGATACAGAAATCAAGTAA  | NM_175854: | NM_175854:                                                   |
| 53354  | PANK1                                       | pantothenate kinase 1                                                                                                                                                  | -1.35  | AACGCTGGTAAATTTGGTGT   | NM_138316: | NM_138316:NM_148977:NM_148978:                               |
| 53354  | PANK1                                       | pantothenate kinase 1                                                                                                                                                  | -1.20  | CCGAAGGATATTACAGCCGAA  | NM_138316: | NM_138316:NM_148977:NM_148978:                               |
| 80025  | PANK2                                       | pantothenate kinase 2 (Hallervorden-Spatz syndrome)                                                                                                                    | -1.81  | CAGAGCGACTTTGATCACCAT  | NM_024960: | NM_153640:NM_153639:NM_153641:NM_153637:NM_153638:NM_024960: |
| 80025  | PANK2                                       | pantothenate kinase 2 (Hallervorden-Spatz syndrome)                                                                                                                    | -0.95  | CTGTGTGTAACCTACTGTAA   | NM_024960: | NM_153640:NM_153639:NM_153641:NM_153637:NM_153638:NM_024960: |
| 79646  | PANK3                                       | pantothenate kinase 3                                                                                                                                                  | 1.60   | AAGCGAGAATCTGTAGTAAA   | NM_024594: | NM_024594:                                                   |
| 79646  | PANK3                                       | pantothenate kinase 3                                                                                                                                                  | 0.11   | TCCAAGGTGATGACACACAA   | NM_024594: | NM_024594:                                                   |
| 55229  | PANK4                                       | pantothenate kinase 4                                                                                                                                                  | 1.50   | CTGGGAGACTTTCATTTGGA   | NM_018216: | NM_018216:                                                   |
| 55229  | PANK4                                       | pantothenate kinase 4                                                                                                                                                  | -0.16  | TCGACATAGCCGGTCTGTAA   | NM_018216: | NM_018216:                                                   |

|        |               |                                                                       |       |                        |            |                                                                                                                                      |
|--------|---------------|-----------------------------------------------------------------------|-------|------------------------|------------|--------------------------------------------------------------------------------------------------------------------------------------|
| 196743 | PAOX          | polyamine oxidase (exo-N4-amino)                                      | 0.03  | CGGAGATGCTGGACACATAAA  | NM_207126: | NM_207129:NM_207127:NM_207128:NM_207125:<br>NM_207126:NM_152911:<br>NM_207129:NM_207127:NM_207128:NM_207125:<br>NM_207126:NM_152911: |
| 196743 | PAOX          | polyamine oxidase (exo-N4-amino)                                      | 0.21  | CGGACTGTGAGTCTGAGTTCA  | NM_207126: | NM_177453:                                                                                                                           |
| 5069   | PAPPA         | pregnancy-associated plasma protein A, pappalysin 1                   | -1.07 | CAGGGAGTGTCTTTGATAT    | NM_002581: | NM_002581:                                                                                                                           |
| 5069   | PAPPA         | pregnancy-associated plasma protein A, pappalysin 1                   | -2.42 | CTGGCCAATGCTAAATACTA   | NM_002581: | NM_002581:                                                                                                                           |
| 9061   | PAPSS1        | 3'-phosphoadenosine 5'-phosphosulfate synthase 1                      | -1.06 | ATGGACTACTAGACTCTGAA   | NM_005443: | NM_005443:                                                                                                                           |
| 9061   | PAPSS1        | 3'-phosphoadenosine 5'-phosphosulfate synthase 1                      | -0.56 | ATGGAGGATACCCTAAGCAA   | NM_005443: | NM_005443:                                                                                                                           |
| 9060   | PAPSS2        | 3'-phosphoadenosine 5'-phosphosulfate synthase 2                      | 0.52  | ATGGAAGTCTCGACAGATTA   | NM_004670: | NM_004670:<br>NM_001015880:NM_004670:                                                                                                |
| 9060   | PAPSS2        | 3'-phosphoadenosine 5'-phosphosulfate synthase 2                      | 1.12  | AACATTGTACCCCTATACTATA | NM_004670: | NM_001015880:NM_004670:                                                                                                              |
| 152559 | PAQR3 (prog)  | progesterin and adipoQ receptor family member III                     | 0.60  | CTAGATTTAAATAATCACTAA  | NM_177453: | NM_177453:                                                                                                                           |
| 152559 | PAQR3 (prog)  | progesterin and adipoQ receptor family member III                     | -0.40 | CAGTTGTTAAGCAATATATAA  | NM_177453: | NM_177453:                                                                                                                           |
| 124222 | PAQR4         | progesterin and adipoQ receptor family member IV                      | 0.57  | ACCCCTGGATGACATCAATAAA | NM_152341: | NM_152341:                                                                                                                           |
| 124222 | PAQR4         | progesterin and adipoQ receptor family member IV                      | -4.89 | CAGCACTGGACAGCCTTCAA   | NM_152341: | NM_152341:                                                                                                                           |
| 54852  | PAQR5         | progesterin and adipoQ receptor family member V                       | -0.30 | TCCAGTCAGTTATAGATCAA   | NM_017705: | NM_017705:                                                                                                                           |
| 54852  | PAQR5         | progesterin and adipoQ receptor family member V                       | 1.81  | TCCATATGCATAAAGAGTTAA  | NM_017705: | NM_017705:                                                                                                                           |
| 79957  | PAQR6         | progesterin and adipoQ receptor family member VI                      | 0.17  | CAGCAGCTATTTCGCTATAGA  | NM_024897: | NM_024897:NM_198406:                                                                                                                 |
| 79957  | PAQR6         | progesterin and adipoQ receptor family member VI                      | 0.26  | AGGGAAGAATCAACACGACTA  | NM_024897: | NM_024897:NM_198406:                                                                                                                 |
| 164091 | PAQR7         | progesterin and adipoQ receptor family member VII                     | 0.22  | CTGAATGGTCTTTGCTAAGAA  | NM_178422: | NM_178422:                                                                                                                           |
| 164091 | PAQR7         | progesterin and adipoQ receptor family member VII                     | 1.04  | TCCTTGGAAAGTCCAAACTCTA | NM_178422: | NM_178422:                                                                                                                           |
| 85315  | PAQR8         | progesterin and adipoQ receptor family member VIII                    | 0.35  | CTAGAAATGCTTATCAATCAA  | NM_133367: | NM_133367:                                                                                                                           |
| 85315  | PAQR8         | progesterin and adipoQ receptor family member VIII                    | 0.59  | AGGAAGCTTATTCATATAA    | NM_133367: | NM_133367:                                                                                                                           |
| 344838 | PAQR9         | progesterin and adipoQ receptor family member IX                      | 1.84  | CACACTCTTCGTGCACTTCTA  | NM_198504: | NM_198504:                                                                                                                           |
| 344838 | PAQR9         | progesterin and adipoQ receptor family member IX                      | 0.78  | CAGGGCTTAACTGCTAGAAA   | NM_198504: | NM_198504:                                                                                                                           |
| 23113  | PARC          | p53-associated parkin-like cytoplasmic protein                        | -8.58 | CAGATCCTTCCCTCCCTCAA   | NM_015089: | NM_015089:                                                                                                                           |
| 23113  | PARC          | p53-associated parkin-like cytoplasmic protein                        | -9.08 | CTGCTGCGCATGGTAAGCAA   | NM_015089: | NM_015089:                                                                                                                           |
| 50855  | PAR6A         | par-6 partitioning defective 6 homolog alpha (C.elegans)              | 0.51  | CCAGGTTTCCCTCAGTCATAGA | NM_016948: | NM_016948:NM_001037281:                                                                                                              |
| 50855  | PAR6A         | par-6 partitioning defective 6 homolog alpha (C.elegans)              | -1.90 | GACCGACATGATGGTTGCCAA  | NM_016948: | NM_016948:NM_001037281:                                                                                                              |
| 84552  | PAR6G         | par-6 partitioning defective 6 homolog gamma (C. elegans)             | 0.51  | TTCATATTGATACAATAA     | NM_032510: | NM_032510:                                                                                                                           |
| 84552  | PAR6G         | par-6 partitioning defective 6 homolog gamma (C. elegans)             | -0.27 | AACGCCTGTAGAGACACTCTA  | NM_032510: | NM_032510:                                                                                                                           |
| 11315  | PARK7         | Parkinson disease (autosomal recessive, early onset) 7                | 0.76  | CAGGCTGTAAACATATAACA   | NM_007262: | NM_007262:                                                                                                                           |
| 11315  | PARK7         | Parkinson disease (autosomal recessive, early onset) 7                | 0.58  | TGGGACGATCACTAGAGAAA   | NM_007262: | NM_007262:                                                                                                                           |
| 142    | PARP1         | poly (ADP-ribose) polymerase family, member 1                         | -1.52 | ACGGTGATCGGTAGCAACAAA  | NM_001618: | NM_001618:                                                                                                                           |
| 142    | PARP1         | poly (ADP-ribose) polymerase family, member 1                         | -0.22 | CCCGTGGCTGTGGTATGAAT   | NM_001618: | NM_001618:                                                                                                                           |
| 10038  | PARP2         | poly (ADP-ribose) polymerase family, member 2                         | -0.94 | AAGTACTATCTGATTCAGCTA  | NM_005484: | NM_005484:                                                                                                                           |
| 10038  | PARP2         | poly (ADP-ribose) polymerase family, member 2                         | -0.06 | CGGACGGGCGAGAGCATTAAA  | NM_005484: | NM_005484:                                                                                                                           |
| 10039  | PARP3         | poly (ADP-ribose) polymerase family, member 3                         | -0.71 | CAGCAAGGAGATGTTCAAGAAA | NM_005485: | NM_001003931:NM_005485:NM_001003935:                                                                                                 |
| 10039  | PARP3         | poly (ADP-ribose) polymerase family, member 3                         | 0.83  | CACCGAGAAGCTCCTCACTAA  | NM_005485: | NM_001003931:NM_005485:NM_001003935:                                                                                                 |
| 143    | PARP4         | poly (ADP-ribose) polymerase family, member 4                         | 0.05  | CGGCGTGGTTCCTATCTTAA   | NM_006437: | NM_006437:                                                                                                                           |
| 143    | PARP4         | poly (ADP-ribose) polymerase family, member 4                         | -0.56 | TAAGTTGGACAGATCATGTA   | NM_006437: | NM_006437:                                                                                                                           |
| 23178  | PASK          | PAS domain containing serine/threonine kinase                         | -0.64 | ATCCTGGTTGTAACGACAAA   | NM_015148: | NM_015148:                                                                                                                           |
| 23178  | PASK          | PAS domain containing serine/threonine kinase                         | 0.85  | CGCGTGACACTGTTGGTTA    | NM_015148: | NM_015148:                                                                                                                           |
| 160065 | PATE          | expressed in prostate and testis                                      | -0.22 | AAGCTGGAAAGAGTGTGAA    | NM_138294: | NM_138294:                                                                                                                           |
| 160065 | PATE          | expressed in prostate and testis                                      | 0.27  | AAGGAGAAAGGGTAGTTTAA   | NM_138294: | NM_138294:                                                                                                                           |
| 5074   | PAWR          | PRKC, apoptosis, WT1, regulator                                       | -0.41 | CAGAATGAAGCTGAAACTTA   | NM_002583: | NM_002583:                                                                                                                           |
| 5074   | PAWR          | PRKC, apoptosis, WT1, regulator                                       | -1.17 | CGAAGAGTGAATACACAAA    | NM_002583: | NM_002583:                                                                                                                           |
| 5076   | PAX2 (paired) | paired box gene 2                                                     | 1.68  | CCCGTAGTGCCTTTCGCTA    | NM_000278: | NM_003988:NM_003990:NM_000278:NM_003987:<br>NM_003989:                                                                               |
| 5076   | PAX2 (paired) | paired box gene 2                                                     | -0.69 | CACAGCTACAGCCCATTA     | NM_000278: | NM_003988:NM_003990:NM_000278:NM_003987:<br>NM_003989:                                                                               |
| 5077   | PAX3          | paired box gene 3 (Waardenburg syndrome 1)                            | -2.52 | TAGAGGGTACTGGAATCTCA   | NM_000438: | NM_000438:                                                                                                                           |
| 5077   | PAX3          | paired box gene 3 (Waardenburg syndrome 1)                            | -0.03 | CCGAGACAATTACTCAAGGA   | NM_000438: | NM_013942:NM_000438:NM_181460:NM_181459:<br>NM_181461:NM_181458:NM_181457:                                                           |
| 5080   | PAX6          | paired box gene 6 (aniridia, keratitis)                               | -0.80 | CCGAGAAGACTAGCAGCCAA   | NM_000280: | NM_000280:NM_001604:                                                                                                                 |
| 5080   | PAX6          | paired box gene 6 (aniridia, keratitis)                               | 0.21  | GACGCATGTATGATAAECTA   | NM_000280: | NM_000280:NM_001604:                                                                                                                 |
| 5081   | PAX7          | paired box gene 7                                                     | 1.75  | CAGGTTTGTGAGTTCGATTA   | NM_002584: | NM_002584:                                                                                                                           |
| 5081   | PAX7          | paired box gene 7                                                     | -2.02 | TAGCCGCGTGTCCAGAACTAA  | NM_002584: | NM_002584:NM_013945:<br>NM_003466:NM_013951:NM_013952:NM_013953:<br>NM_013992:                                                       |
| 7849   | PAX8 (paired) | paired box gene 8                                                     | 0.16  | TCCATTATTAACAACTCTA    | NM_013992: | NM_003466:NM_013951:NM_013952:NM_013953:<br>NM_013992:                                                                               |
| 7849   | PAX8 (paired) | paired box gene 8                                                     | -2.39 | ATGGTCCATTATTAACACAA   | NM_013992: | NM_013992:                                                                                                                           |
| 5083   | PAX9 (paired) | paired box gene 9                                                     | 0.54  | CGGCGTGGCAGCAAGTACAA   | NM_006194: | NM_006194:                                                                                                                           |
| 5083   | PAX9 (paired) | paired box gene 9                                                     | 0.41  | TCCGGCATCGCTGGCGTTCAA  | NM_006194: | NM_006194:                                                                                                                           |
| 55193  | PB1           | polybromo 1                                                           | -1.45 | CAGGCTTACATCGCACATACA  | NM_018165: | NM_181042:NM_181041:NM_018165:NM_018313:                                                                                             |
| 55193  | PB1           | polybromo 1                                                           | -1.30 | CGGAGTCTTTGATCTACAAA   | NM_018165: | NM_181042:NM_181041:NM_018165:NM_018313:                                                                                             |
| 10135  | PBEF1         | pre-B-cell colony enhancing factor 1                                  | 1.13  | CTGGAATGTCTAGGCCTGTA   | NM_005746: | NM_005746:                                                                                                                           |
| 10135  | PBEF1         | pre-B-cell colony enhancing factor 1                                  | 0.95  | AGGGCCGATTATCTTACATA   | NM_005746: | NM_005746:                                                                                                                           |
| 55872  | PBK           | PDZ binding kinase                                                    | 0.51  | AAGTGTGGCTGCGTAAATAA   | NM_018492: | NM_018492:                                                                                                                           |
| 55872  | PBK           | PDZ binding kinase                                                    | 0.01  | CTCATTCTCCTGGGCTGTA    | NM_018492: | NM_018492:                                                                                                                           |
| 5087   | PBX1          | pre-B-cell leukemia transcription factor 1                            | -5.66 | CAGACTGGAGGTGGAAGCAAT  | NM_002585: | NM_002585:                                                                                                                           |
| 5087   | PBX1          | pre-B-cell leukemia transcription factor 1                            | -3.08 | CAGGTTGGAGCCAACTGCAAA  | NM_002585: | NM_002585:                                                                                                                           |
| 5091   | PC            | pyruvate carboxylase                                                  | -4.49 | TGGGAAGTGATAGACATCAA   | NM_000920: | NM_000920:NM_022172:                                                                                                                 |
| 5091   | PC            | pyruvate carboxylase                                                  | -5.48 | CCGAGACAACGCTGCTTCAA   | NM_000920: | NM_000920:NM_022172:                                                                                                                 |
| 8850   | PCAF          | p300/CBP-associated factor                                            | -2.22 | CGGAGTGTACTCCGCTGCAA   | NM_003884: | NM_003884:                                                                                                                           |
| 8850   | PCAF          | p300/CBP-associated factor                                            | 1.36  | CAGCAATAATTTGCTAGCTA   | NM_003884: | NM_003884:                                                                                                                           |
| 5092   | PCBD1         | pterin-4 alpha-carbinolamine dehydratase/dimerization cofactor of hef | -1.25 | CTGGCCAGCTTCATCGAACAA  | NM_000281: | NM_000281:                                                                                                                           |
| 5092   | PCBD1         | pterin-4 alpha-carbinolamine dehydratase/dimerization cofactor of hef | 0.01  | ATGGTTAACGCTGTACACAAA  | NM_000281: | NM_000281:NM_001001939:                                                                                                              |
| 84105  | PCBD2         | pterin-4 alpha-carbinolamine dehydratase/dimerization cofactor of hef | 0.05  | CAAGCTATACTTGACCTTAA   | NM_032151: | NM_032151:                                                                                                                           |
| 84105  | PCBD2         | pterin-4 alpha-carbinolamine dehydratase/dimerization cofactor of hef | 0.20  | CAGCAGGATGGTGGGAATTA   | NM_032151: | NM_032151:                                                                                                                           |
| 5095   | PCCA (propio) | propionyl Coenzyme A carboxylase, alpha polypeptide                   | 0.06  | CTGGATAACTATGTTATCGA   | NM_000282: | NM_000282:                                                                                                                           |
| 5095   | PCCA (propio) | propionyl Coenzyme A carboxylase, alpha polypeptide                   | -0.89 | CAGGTTCTAGGTGATAAACAT  | NM_000282: | NM_000282:                                                                                                                           |
| 5096   | PCCB          | propionyl Coenzyme A carboxylase, beta polypeptide                    | -1.17 | CTCAGGATGCTGGATATTA    | NM_000532: | NM_000532:                                                                                                                           |
| 5096   | PCCB          | propionyl Coenzyme A carboxylase, beta polypeptide                    | -0.01 | CAGCACAAAGCGAGAAAGCTA  | NM_000532: | NM_000532:                                                                                                                           |
| 57575  | PCDH10        | protocadherin 10                                                      | 0.89  | CGGCTCAAGTCTTCCCTTAA   | NM_020815: | NM_020815:NM_032961:                                                                                                                 |
| 57575  | PCDH10        | protocadherin 10                                                      | 0.46  | TAGGATATTAGCTTATGTGTA  | NM_020815: | NM_020815:                                                                                                                           |
| 65217  | PCDH15        | protocadherin 15                                                      | -0.01 | ATGGATTAGTAGTATGCTTA   | NM_033056: | NM_033056:                                                                                                                           |
| 65217  | PCDH15        | protocadherin 15                                                      | 0.90  | ATCGCTATGTTCCAGAACAAA  | NM_033056: | NM_033056:                                                                                                                           |
| 27253  | PCDH17        | protocadherin 17                                                      | 0.10  | CAGACTGCTCCGCTGATTTA   | NM_014459: | NM_014459:                                                                                                                           |
| 27253  | PCDH17        | protocadherin 17                                                      | 1.87  | CCAACGTTAAACCTTATTTAA  | NM_014459: | NM_014459:                                                                                                                           |
| 54510  | PCDH18        | protocadherin 18                                                      | -2.65 | CGGAGAAATTTCTCTCACAA   | NM_019035: | NM_019035:                                                                                                                           |
| 54510  | PCDH18        | protocadherin 18                                                      | -2.52 | CTGGCCATAGTAGCAGGTTAA  | NM_019035: | NM_019035:                                                                                                                           |
| 64881  | PCDH20        | protocadherin 20                                                      | -0.27 | CAACTTGTGGTGTACTTTAA   | NM_022843: | NM_022843:                                                                                                                           |
| 64881  | PCDH20        | protocadherin 20                                                      | 1.44  | ACCTATTTAAACATATGATA   | NM_022843: | NM_022843:                                                                                                                           |
| 92211  | PCDH21        | protocadherin 21                                                      | 0.01  | CAGGTACAACCTTCTATGTGAA | NM_033100: | NM_033100:                                                                                                                           |
| 92211  | PCDH21        | protocadherin 21                                                      | -0.43 | CAGGTTGGTAGCAAGATCTT   | NM_033100: | NM_033100:                                                                                                                           |
| 5099   | PCDH7         | BH-protocadherin (brain-heart)                                        | 0.79  | CAGAATGTGCTACTAATGGA   | NM_002589: | NM_002589:                                                                                                                           |
| 5099   | PCDH7         | BH-protocadherin (brain-heart)                                        | 1.37  | CAGAGGTATGATAGTCAAT    | NM_002589: | NM_032456:NM_032457:NM_002589:                                                                                                       |

|        |                                                                                              |        |                        |               |                                                  |
|--------|----------------------------------------------------------------------------------------------|--------|------------------------|---------------|--------------------------------------------------|
| 5101   | PCDH9 (protcprotocadherin 9                                                                  | 0.28   | AAGGCGGTATATGACAACCAA  | NM_020403:    | NM_020403:NM_203487:                             |
| 5101   | PCDH9 (protcprotocadherin 9                                                                  | -0.26  | ACCGAGCTGGGTTACTACTTAA | NM_020403:    | NM_020403:NM_203487:                             |
| 9752   | PCDH9A9 protocadherin alpha 9                                                                | 0.66   | CACCTTGAATATAGCTTTATA  | NM_014005:    | NM_014005:                                       |
| 9752   | PCDH9A9 protocadherin alpha 9                                                                | 0.15   | CAGCCTTCATTTCAACTTATA  | NM_014005:    | NM_014005:                                       |
| 29930  | PCDHB1 protocadherin beta 1                                                                  | 0.66   | CTGGCCCTTGCCATATGAAA   | NM_013340:    | NM_013340:                                       |
| 29930  | PCDHB1 protocadherin beta 1                                                                  | 0.12   | ACCAAGCATTTCTAGAAAGGTA | NM_013340:    | NM_013340:                                       |
| 57717  | PCDHB16 protocadherin beta 16                                                                | 0.37   | AACGGTACGGTGATAATTA    | NM_020957:    | NM_020957:                                       |
| 57717  | PCDHB16 protocadherin beta 16                                                                | -0.31  | AAGCAAGAGCTGAAATAATA   | NM_020957:    | NM_020957:                                       |
| 26167  | PCDHB5 protocadherin beta 5                                                                  | -0.94  | GACCGGCAATTTGCTTCTATA  | NM_015669:    | NM_015669:                                       |
| 26167  | PCDHB5 protocadherin beta 5                                                                  | 0.65   | TCGAGGCAACTCCATTTATA   | NM_015669:    | NM_015669:                                       |
| 648    | PCGF4 polycomb group ring finger 4                                                           | -2.01  | CAGAGTTCGACCTACTTGTA   | NM_005180:    | NM_005180:                                       |
| 648    | PCGF4 polycomb group ring finger 4                                                           | 0.13   | CTCCTATGGACGTTAATTGAA  | NM_005180:    | NM_005180:                                       |
| 5105   | PK1 phosphoenolpyruvate carboxylase 1 (soluble)                                              | -2.10  | CACAGCGGCTGCAGAACATA   | NM_002591:    | NM_002591:                                       |
| 5105   | PK1 phosphoenolpyruvate carboxylase 1 (soluble)                                              | 0.86   | TGGACTTCAGTGAAGACCAA   | NM_002591:    | NM_002591:                                       |
| 5108   | PCM1 pericentriolar material 1                                                               | 0.05   | CAGGCTTTAACTAATTTGGA   | NM_006197:    | NM_006197:                                       |
| 5108   | PCM1 pericentriolar material 1                                                               | 1.94   | ACCGTATTCACTTAGATCAA   | NM_006197:    | NM_006197:                                       |
| 5110   | PCMT1 (prote protein-L-isoaspartate (D-aspartate) O-methyltransferase                        | 0.35   | TACGTGCTTTAACAGATAA    | NM_005389:    | NM_005389:                                       |
| 5110   | PCMT1 (prote protein-L-isoaspartate (D-aspartate) O-methyltransferase                        | -0.16  | CTACAAGATGGCAGCATCAAA  | NM_005389:    | NM_005389:                                       |
| 115294 | PCMTD1 protein-L-isoaspartate (D-aspartate) O-methyltransferase domain cont                  | 1.19   | TAGACGATTACTAAACTGTTA  | NM_052937:    | NM_052937:                                       |
| 115294 | PCMTD1 protein-L-isoaspartate (D-aspartate) O-methyltransferase domain cont                  | 1.68   | ACAATTATCTTAGACGATTA   | NM_052937:    | NM_052937:                                       |
| 55251  | PCMTD2 protein-L-isoaspartate (D-aspartate) O-methyltransferase domain cont                  | 1.47   | AACACAAATCATGCAATAAA   | NM_018257:    | NM_018257:                                       |
| 55251  | PCMTD2 protein-L-isoaspartate (D-aspartate) O-methyltransferase domain cont                  | 0.57   | CAAGTTTCAAGTTTATAGATA  | NM_018257:    | NM_018257:                                       |
| 5111   | PCNA proliferating cell nuclear antigen                                                      | -3.03  | AAGGATCTTAGGCTTCTTAA   | M15796:       | NM_002592:NM_182649:                             |
| 5111   | PCNA proliferating cell nuclear antigen                                                      | 0.30   | ATGGATTTAGATGTTGAACAA  | M15796:       | NM_002592:NM_182649:                             |
| 5119   | PCOLN3 procollagen (type III) N-endopeptidase                                                | 0.06   | ATGCTGTTGTAATAAACAAA   | NM_002768:    | NM_002768:                                       |
| 5119   | PCOLN3 procollagen (type III) N-endopeptidase                                                | 0.56   | TAGAATGCTGTTGTAATAAA   | NM_002768:    | NM_002768:                                       |
| 51586  | PCOAP PC2 (positive cofactor 2, multiprotein complex) glutamine/Q-rich-assor                 | -2.59  | CAGCATTAATAAATTCGAT    | NM_001003891: | NM_015889:NM_001003891:                          |
| 51586  | PCOAP PC2 (positive cofactor 2, multiprotein complex) glutamine/Q-rich-assor                 | -8.60  | CCCGTGACTACTCCTGCCCAA  | NM_001003891: | NM_001003891:                                    |
| 5122   | PCSK1 proprotein convertase subtilisin/kexin type 1                                          | -1.00  | AAGTAATTCATGGCATTGAA   | NM_000439:    | NM_000439:                                       |
| 5122   | PCSK1 proprotein convertase subtilisin/kexin type 1                                          | -1.04  | TAGCAGGATCTGTACAATA    | NM_000439:    | NM_000439:                                       |
| 27344  | PCSK1N proprotein convertase subtilisin/kexin type 1 inhibitor                               | 0.14   | CAGCAGCTCCAGGACCACTTA  | NM_013271:    | NM_013271:                                       |
| 27344  | PCSK1N proprotein convertase subtilisin/kexin type 1 inhibitor                               | 0.13   | CTGCTGCTGTGAAACGCCTA   | NM_013271:    | NM_013271:                                       |
| 5126   | PCSK2 proprotein convertase subtilisin/kexin type 2                                          | -1.11  | CACAGGTGTGGTGAATTTAT   | NM_002594:    | NM_002594:                                       |
| 5126   | PCSK2 proprotein convertase subtilisin/kexin type 2                                          | -1.10  | AAGTTTATGGTCAATCCGAAA  | NM_002594:    | NM_002594:                                       |
| 54760  | PCSK4 proprotein convertase subtilisin/kexin type 4                                          | 0.30   | ACCTCAGAGTTTGCATAATAA  | NM_017573:    | NM_017573:                                       |
| 54760  | PCSK4 proprotein convertase subtilisin/kexin type 4                                          | 0.07   | CCGCTGATCTACATCAGGGAA  | NM_017573:    | NM_017573:                                       |
| 5125   | PCSK5 proprotein convertase subtilisin/kexin type 5                                          | -1.60  | CTGATGGGCTCATACAGGATA  | NM_006200:    | NM_006200:                                       |
| 5125   | PCSK5 proprotein convertase subtilisin/kexin type 5                                          | 0.54   | CGGAATTCGTTTCAACGCCAA  | NM_006200:    | NM_006200:                                       |
| 5046   | PCSK6 proprotein convertase subtilisin/kexin type 6                                          | -0.16  | CCGAGATATCTATTTCTACAT  | NM_002570:    | NM_138319:NM_002570:                             |
| 5046   | PCSK6 proprotein convertase subtilisin/kexin type 6                                          | -0.33  | ACGGCGGGGTCATAAAGTTA   | NM_002570:    | NM_138319:NM_002570:NM_138323:NM_138320:         |
| 9159   | PCSK7 proprotein convertase subtilisin/kexin type 7                                          | -1.04  | TCGGAGGATTGTGACCACCTGA | NM_004716:    | NM_004716:                                       |
| 9159   | PCSK7 proprotein convertase subtilisin/kexin type 7                                          | -0.63  | ATGCCTTTCTATGTCAGAGAAA | NM_004716:    | NM_004716:                                       |
| 5127   | PCTK1 PCTAIRE protein kinase 1                                                               | 1.62   | CACCATAATCGCTGTATGAAA  | NM_006201:    | NM_033018:NM_006201:                             |
| 5127   | PCTK1 PCTAIRE protein kinase 1                                                               | 1.73   | CACGCCAACATCGTTAGCGCTA | NM_006201:    | NM_033018:NM_006201:                             |
| 5128   | PCTK2 PCTAIRE protein kinase 2                                                               | 0.88   | AGGCTTAATCTTTGGGTATA   | NM_002595:    | NM_002595:                                       |
| 5128   | PCTK2 PCTAIRE protein kinase 2                                                               | 1.44   | TAGGCTTAATCTTTGGGTATA  | NM_002595:    | NM_002595:                                       |
| 5129   | PCTK3 PCTAIRE protein kinase 3                                                               | -10.06 | CAGGTTGGATACGGATGGCAT  | NM_002596:    | NM_212502:NM_002596:                             |
| 5132   | PDC phosphudcin                                                                              | 0.89   | TCGAGTTATAGCATTTCTTA   | NM_002597:    | NM_002597:NM_022576:                             |
| 5132   | PDC phosphudcin                                                                              | 1.62   | AACAATCGAGTTATTAGCATT  | NM_002597:    | NM_002597:NM_022576:                             |
| 5133   | PDCD1 programmed cell death 1                                                                | 0.89   | ATCGGAGAGCTTCGTGCTAAA  | NM_005018:    | NM_005018:                                       |
| 5133   | PDCD1 programmed cell death 1                                                                | 1.62   | CCCATTCCTGAAATTTTATA   | NM_005018:    | NM_005018:                                       |
| 11235  | PDCD10 programmed cell death 10                                                              | -0.11  | ACGCTTAATGTGTCATTATA   | NM_007217:    | NM_007217:NM_145859:NM_145860:                   |
| 11235  | PDCD10 programmed cell death 10                                                              | 1.84   | TACGGATTACGATTCAGTTTA  | NM_007217:    | NM_007217:                                       |
| 27250  | PDCD4 programmed cell death 4 (neoplastic transformation inhibitor)                          | -0.03  | CACCATGAGCTGTATATGAA   | NM_014456:    | NM_145341:NM_014456:                             |
| 27250  | PDCD4 programmed cell death 4 (neoplastic transformation inhibitor)                          | 0.10   | CTCAACGCTGTGCTAATTTA   | NM_014456:    | NM_145341:NM_014456:                             |
| 10016  | PDCD6 programmed cell death 6                                                                | -1.47  | CACGGTGTGTGGAAGTACAT   | NM_013232:    | NM_013232:                                       |
| 10016  | PDCD6 programmed cell death 6                                                                | 1.70   | GACGGATATATTCAGACGTTA  | NM_013232:    | NM_013232:                                       |
| 10015  | PDCD6IP programmed cell death 6 interacting protein                                          | 0.14   | CCAGCTTTGTTGCAATTTATA  | AB037796:     | NM_013374:                                       |
| 10015  | PDCD6IP programmed cell death 6 interacting protein                                          | -0.02  | GAGGTACTTTACTAACATA    | AB037796:     | NM_013374:                                       |
| 9131   | PDCD8 programmed cell death 8 (apoptosis-inducing factor)                                    | -1.54  | AAGGTAGAACTGACACCACTA  | NM_004208:    | NM_004208:NM_145812:NM_145813:                   |
| 9131   | PDCD8 programmed cell death 8 (apoptosis-inducing factor)                                    | -1.70  | AGGCTACTGATTTGATCTGAA  | NM_004208:    | NM_004208:NM_145812:                             |
| 5082   | PDCL phosphudcin-like                                                                        | 1.49   | CAGGAAAGTATTTGATGCTA   | NM_005388:    | NM_005388:                                       |
| 5082   | PDCL phosphudcin-like                                                                        | 1.10   | CAAGTAGTTTATGGATTTAAA  | NM_005388:    | NM_005388:                                       |
| 10846  | PDE10A phosphodiesterase 10A                                                                 | -0.01  | CAGTATTACTATACAATGTA   | NM_006661:    | NM_006661:                                       |
| 10846  | PDE10A phosphodiesterase 10A                                                                 | 0.10   | TAGACTCTATTACACAATGAA  | NM_006661:    | NM_006661:                                       |
| 50940  | PDE11A phosphodiesterase 11A                                                                 | -0.45  | CAGGTTTACAATAGTAAAGAA  | NM_016953:    | NM_016953:                                       |
| 50940  | PDE11A phosphodiesterase 11A                                                                 | 1.05   | ATCGTATATATTTTCATCAA   | NM_016953:    | NM_016953:                                       |
| 5136   | PDE1A phosphodiesterase 1A, calmodulin-dependent                                             | 0.58   | ACAGAGTGCTATAACTATAA   | NM_005019:    | NM_005019:                                       |
| 5136   | PDE1A phosphodiesterase 1A, calmodulin-dependent                                             | 0.36   | ACACAGAGTGCTATAACTATA  | NM_005019:    | NM_005019:                                       |
| 5153   | PDE1B phosphodiesterase 1B, calmodulin-dependent                                             | 0.38   | CAGGTTCTTATGAGTCCAAA   | NM_000924:    | NM_000924:                                       |
| 5153   | PDE1B phosphodiesterase 1B, calmodulin-dependent                                             | 0.61   | ATCGTGTACAATGATCGTTCA  | NM_000924:    | NM_000924:                                       |
| 5137   | PDE1C phosphodiesterase 1C, calmodulin-dependent 70kDa                                       | 0.38   | AACAGATGATTCACAAGAGTA  | NM_005020:    | NM_005020:                                       |
| 5137   | PDE1C phosphodiesterase 1C, calmodulin-dependent 70kDa                                       | -1.35  | AAGGATCACTTAACTCGGA    | NM_005020:    | NM_005020:                                       |
| 5138   | PDE2A phosphodiesterase 2A, cGMP-stimulated                                                  | -0.28  | ACCGCTTTGATACATGAGAATA | NM_002599:    | NM_002599:                                       |
| 5138   | PDE2A phosphodiesterase 2A, cGMP-stimulated                                                  | -2.38  | ATCGCGGAGCTGATCTACAAA  | NM_002599:    | NM_002599:                                       |
| 5139   | PDE3A phosphodiesterase 3A, cGMP-inhibited                                                   | 0.15   | TACAGTAGGATACATTTGTTA  | NM_000921:    | NM_000921:                                       |
| 5139   | PDE3A phosphodiesterase 3A, cGMP-inhibited                                                   | -0.16  | AACGTATAATGTGACAGATGA  | NM_000921:    | NM_000921:                                       |
| 5140   | PDE3B phosphodiesterase 3B, cGMP-inhibited                                                   | -0.11  | CAGGTTATGATACCTTATTT   | NM_000922:    | NM_000922:                                       |
| 5140   | PDE3B phosphodiesterase 3B, cGMP-inhibited                                                   | -4.45  | CACAGAGTGAACAGCAACAAA  | NM_000922:    | NM_000922:                                       |
| 5141   | PDE4A phosphodiesterase 4A, cAMP-specific (phosphodiesterase E2 dunce 1)                     | 0.19   | TTCGATCTTGTCTCAATATA   | NM_006202:    | NM_006202:                                       |
| 5141   | PDE4A phosphodiesterase 4A, cAMP-specific (phosphodiesterase E2 dunce 1)                     | -0.01  | ATGGGAAGTGTGCTGATCTCTA | NM_006202:    | NM_006202:                                       |
| 5142   | PDE4B phosphodiesterase 4B, cAMP-specific (phosphodiesterase E4 dunce 1)                     | 0.11   | CAGGACATTTCTGATACCTTA  | NM_002600:    | NM_001037340:NM_002600:NM_001037339:NM_01037341: |
| 5142   | PDE4B phosphodiesterase 4B, cAMP-specific (phosphodiesterase E4 dunce 1)                     | -2.43  | CACCAAGTCTTGGAAATTTGA  | NM_002600:    | NM_001037340:NM_002600:NM_001037339:NM_01037341: |
| 5143   | PDE4C phosphodiesterase 4C, cAMP-specific (phosphodiesterase E1 dunce 1)                     | 1.41   | TCCTTCTTATCAAAATTTTA   | NM_000923:    | NM_000923:                                       |
| 5143   | PDE4C phosphodiesterase 4C, cAMP-specific (phosphodiesterase E1 dunce 1)                     | 0.01   | TAGGGAGACAATCAAGCTCTT  | NM_000923:    | NM_000923:                                       |
| 5144   | PDE4D phosphodiesterase 4D, cAMP-specific (phosphodiesterase E3 dunce 1)                     | 0.88   | TACTGTAATGTTAATTTGAAA  | NM_006203:    | NM_006203:                                       |
| 5144   | PDE4D phosphodiesterase 4D, cAMP-specific (phosphodiesterase E3 dunce 1)                     | -1.48  | TACCCACTAATGGCAACATA   | NM_006203:    | NM_006203:                                       |
| 8654   | PDE5A phosphodiesterase 5A, cGMP-specific                                                    | 0.19   | CAGAGATGGTGTGTTCTGCAA  | NM_001083:    | NM_003437:NM_001083:NM_033430:                   |
| 8654   | PDE5A phosphodiesterase 5A, cGMP-specific                                                    | -1.05  | TCGGATTTTACTGACCTCAA   | NM_001083:    | NM_003437:NM_001083:NM_033430:                   |
| 5145   | PDE6A phosphodiesterase 6A, cGMP-specific, rod, alpha                                        | 0.00   | CGGATCAACCAACATCGCAA   | NM_000440:    | NM_000440:                                       |
| 5145   | PDE6A phosphodiesterase 6A, cGMP-specific, rod, alpha                                        | -1.35  | CAGATGATTTATGAGCTCAAA  | NM_000440:    | NM_000440:                                       |
| 5158   | PDE6B phosphodiesterase 6B, cGMP-specific, rod, beta (congenital stationary night blindness) | -1.84  | CCGGGAAATTTGCTTCTACAA  | NM_000283:    | NM_000283:                                       |
| 5158   | PDE6B phosphodiesterase 6B, cGMP-specific, rod, beta (congenital stationary night blindness) | -2.03  | CACGCTGCTCATGACCGCCAAA | NM_000283:    | NM_000283:                                       |
| 5146   | PDE6C phosphodiesterase 6C, cGMP-specific, cone, alpha prime                                 | -2.47  | ACGGATTTGATTAATGTGGAA  | NM_006204:    | NM_006204:                                       |
| 5146   | PDE6C phosphodiesterase 6C, cGMP-specific, cone, alpha prime                                 | -2.15  | CACGGTTAGATCATATCTGAA  | NM_006204:    | NM_006204:                                       |
| 5148   | PDE6G phosphodiesterase 6G, cGMP-specific, rod, gamma                                        | -6.24  | CTCGCTGACCTCACCATGAA   | NM_002602:    | NM_002602:                                       |

|        |        |                                                                         |       |                        |               |                                                                                                                                                                                                                           |
|--------|--------|-------------------------------------------------------------------------|-------|------------------------|---------------|---------------------------------------------------------------------------------------------------------------------------------------------------------------------------------------------------------------------------|
| 5148   | PDE6G  | phosphodiesterase 6G, cGMP-specific, rod, gamma                         | -1.08 | GACGACATCCCTGGAATGGAA  | NM_002602:    | NM_002602:                                                                                                                                                                                                                |
| 5150   | PDE7A  | phosphodiesterase 7A                                                    | 0.02  | CCGAACATACAGCAATATGAA  | NM_002603:    | NM_002603:                                                                                                                                                                                                                |
| 5150   | PDE7A  | phosphodiesterase 7A                                                    | 0.35  | CCCGAACATACAGCAATATGAA | NM_002603:    | NM_002603:                                                                                                                                                                                                                |
| 27115  | PDE7B  | phosphodiesterase 7B                                                    | -0.08 | TTCAATGTACCCAACTTGAA   | NM_018945:    | NM_018945:                                                                                                                                                                                                                |
| 27115  | PDE7B  | phosphodiesterase 7B                                                    | 0.42  | CACCTCCACAAATAAGACTTA  | NM_018945:    | NM_018945:                                                                                                                                                                                                                |
| 5151   | PDE8A  | phosphodiesterase 8A                                                    | -1.21 | CCCGGATACATCCATGACAA   | NM_002605:    | NM_173455:NM_002605:NM_173456:NM_173457:NM_173454:                                                                                                                                                                        |
| 5151   | PDE8A  | phosphodiesterase 8A                                                    | 0.57  | ACGGAGATAATATACAACAAA  | NM_002605:    | NM_173455:NM_002605:NM_173456:NM_173457:NM_173454:                                                                                                                                                                        |
| 8622   | PDE8B  | phosphodiesterase 8B                                                    | 0.69  | TTGGAAGCCATTACGCATAAA  | NM_003719:    | NM_001029851:NM_003719:NM_001029852:NM_001029853:NM_001029854:                                                                                                                                                            |
| 8622   | PDE8B  | phosphodiesterase 8B                                                    | 2.25  | CAGGAAACGAGTATGTGTTTA  | NM_003719:    | NM_001029851:NM_003719:NM_001029852:NM_001029853:NM_001029854:                                                                                                                                                            |
| 5152   | PDE9A  | phosphodiesterase 9A                                                    | 0.24  | AACGGATATCCTGATCCTAAT  | NM_002606:    | NM_001001573:NM_001001567:NM_001001568:NM_001001569:NM_001001577:NM_001001585:NM_001001579:NM_002606:NM_001001581:NM_00101578:NM_001001574:NM_001001584:NM_001001583:NM_001001571:NM_001001575:NM_001001570:NM_001001572: |
| 5152   | PDE9A  | phosphodiesterase 9A                                                    | 0.14  | CGCGTGGAATTGGAAGGACTA  | NM_002606:    | NM_001001573:NM_001001567:NM_001001568:NM_001001569:NM_001001577:NM_001001585:NM_001001579:NM_002606:NM_001001581:NM_00101578:NM_001001574:NM_001001584:NM_001001583:NM_001001571:NM_001001575:NM_001001570:NM_001001572: |
| 5154   | PDGFA  | platelet-derived growth factor alpha polypeptide                        | 0.39  | CAGTGTGGAGCAGAACCCAA   | NM_002607:    | NM_002607:                                                                                                                                                                                                                |
| 5154   | PDGFA  | platelet-derived growth factor alpha polypeptide                        | -0.29 | AAAGAACTATGCGTCAACCAA  | NM_002607:    | NM_002607:                                                                                                                                                                                                                |
| 5155   | PDGFB  | platelet-derived growth factor beta polypeptide (simian sarcoma viral ( | 0.08  | CAGGGTATTAAATATGGTAT   | NM_002608:    | NM_033016:NM_002608:                                                                                                                                                                                                      |
| 5155   | PDGFB  | platelet-derived growth factor beta polypeptide (simian sarcoma viral ( | -0.09 | GCGGAAGAAGCCAACTTTAA   | NM_002608:    | NM_033016:NM_002608:                                                                                                                                                                                                      |
| 56034  | PDGFC  | platelet derived growth factor C                                        | -1.05 | AAGAACTATGTGCTATGAA    | NM_016205:    | NM_016205:                                                                                                                                                                                                                |
| 56034  | PDGFC  | platelet derived growth factor C                                        | 0.86  | CCGAGTGATGAACTATATTA   | NM_016205:    | NM_016205:                                                                                                                                                                                                                |
| 80310  | PDGFD  | platelet derived growth factor D                                        | 2.38  | AAGGTATATCATCAACTCTTA  | NM_025208:    | NM_033135:NM_025208:                                                                                                                                                                                                      |
| 80310  | PDGFD  | platelet derived growth factor D                                        | -0.32 | TACATCTTATGTTGATTATTA  | NM_025208:    | NM_033135:NM_025208:                                                                                                                                                                                                      |
| 5156   | PDGFRA | platelet-derived growth factor receptor, alpha polypeptide              | -1.18 | ACGCAGGAAGCCTACTATTTA  | NM_006206:    | NM_006206:                                                                                                                                                                                                                |
| 5156   | PDGFRA | platelet-derived growth factor receptor, alpha polypeptide              | 0.62  | CCCGAGACTCCTGTAAACCTTA | NM_006206:    | NM_006206:                                                                                                                                                                                                                |
| 5159   | PDGFRB | platelet-derived growth factor receptor, beta polypeptide               | -1.73 | ATCCATCAACGCTCTGTGAA   | NM_002609:    | NM_002609:                                                                                                                                                                                                                |
| 5159   | PDGFRB | platelet-derived growth factor receptor, beta polypeptide               | 0.88  | CCGAGCAACTTTGATCAACGA  | NM_002609:    | NM_002609:                                                                                                                                                                                                                |
| 5157   | PDGFRL | platelet-derived growth factor receptor-like                            | -4.29 | ACGCAGTCTATCATGATGCAA  | NM_006207:    | NM_006207:                                                                                                                                                                                                                |
| 5157   | PDGFRL | platelet-derived growth factor receptor-like                            | 0.21  | CTGGAGGATGTTACTGGCCAA  | NM_006207:    | NM_006207:                                                                                                                                                                                                                |
| 5160   | PDHA1  | pyruvate dehydrogenase (lipoamide) alpha 1                              | -0.48 | TTGCATGCAGTTTGTACATTA  | NM_000284:    | NM_000284:                                                                                                                                                                                                                |
| 5160   | PDHA1  | pyruvate dehydrogenase (lipoamide) alpha 1                              | 0.51  | AACCCAGTCAATGAAATGCAA  | NM_000284:    | NM_000284:                                                                                                                                                                                                                |
| 64714  | PDI2A  | protein disulfide isomerase family A, member 2                          | 0.03  | GAGCTGTGCATTGTGAATAAA  | NM_006849:    | NM_006849:                                                                                                                                                                                                                |
| 64714  | PDI2A  | protein disulfide isomerase family A, member 2                          | -1.33 | CTGCGCTTGGTCAACCTTGAA  | NM_006849:    | NM_006849:                                                                                                                                                                                                                |
| 2923   | PDI2A  | protein disulfide isomerase family A, member 3                          | -0.63 | TAGCTGCACTGTTTATGGAAA  | NM_005313:    | NM_005313:                                                                                                                                                                                                                |
| 2923   | PDI2A  | protein disulfide isomerase family A, member 3                          | 0.61  | CCCAATATCGTCATAGCCAA   | NM_005313:    | NM_005313:                                                                                                                                                                                                                |
| 9601   | PDI2A  | protein disulfide isomerase family A, member 4                          | 0.35  | TTGAGCAAGTTTATAGAAGAA  | NM_004911:    | NM_004911:                                                                                                                                                                                                                |
| 9601   | PDI2A  | protein disulfide isomerase family A, member 4                          | -1.02 | CAAGGTGTCAAACGATGCTAA  | NM_004911:    | NM_004911:                                                                                                                                                                                                                |
| 10954  | PDI2A  | protein disulfide isomerase family A, member 5                          | 0.34  | GAGGAGACACCATGAAAGACTA | NM_006810:    | NM_006810:                                                                                                                                                                                                                |
| 10954  | PDI2A  | protein disulfide isomerase family A, member 5                          | 1.24  | ACCGCAGAGAAATGGGATTTA  | NM_006810:    | NM_006810:                                                                                                                                                                                                                |
| 10130  | PDI2A  | protein disulfide isomerase family A, member 6                          | 0.88  | AAGATGAAATTTGCTCTGCTA  | NM_005742:    | NM_005742:                                                                                                                                                                                                                |
| 10130  | PDI2A  | protein disulfide isomerase family A, member 6                          | 0.93  | ACGGGATTAGAGGATTTCTTA  | NM_005742:    | NM_005742:                                                                                                                                                                                                                |
| 149420 | PDIK1L | PDLIM1 interacting kinase 1 like                                        | -3.47 | AAGCTAGACTTACCCCTTAA   | NM_152835:    | NM_152835:                                                                                                                                                                                                                |
| 149420 | PDIK1L | PDLIM1 interacting kinase 1 like                                        | -0.52 | CAGCCAAAGTACGATCAATA   | NM_152835:    | NM_152835:                                                                                                                                                                                                                |
| 204474 | PDLIT  | protein disulfide isomerase-like protein of the testis                  | -0.70 | CCCATCCGTCGAAATCCTAAA  | NM_174924:    | NM_174924:                                                                                                                                                                                                                |
| 204474 | PDLIT  | protein disulfide isomerase-like protein of the testis                  | 0.57  | TCCGAGTCATATGCTATCATA  | NM_174924:    | NM_174924:                                                                                                                                                                                                                |
| 5163   | PK1    | (pyruvate) pyruvate dehydrogenase kinase, isozyme 1                     | -0.16 | CCCGAACTAGAACTTGAAGAA  | NM_002610:    | NM_002610:                                                                                                                                                                                                                |
| 5163   | PK1    | (pyruvate) pyruvate dehydrogenase kinase, isozyme 1                     | 1.29  | TCGGTTTCTATAGGAAACTA   | NM_002610:    | NM_002610:                                                                                                                                                                                                                |
| 5164   | PK2    | (pyruvate) pyruvate dehydrogenase kinase, isozyme 2                     | -1.15 | AAGAACCTTTGATAGCCGAGA  | NM_002611:    | NM_002611:                                                                                                                                                                                                                |
| 5164   | PK2    | (pyruvate) pyruvate dehydrogenase kinase, isozyme 2                     | -1.15 | TAGTCTGTGATGTCCTCAA    | NM_002611:    | NM_002611:                                                                                                                                                                                                                |
| 5165   | PK3    | (pyruvate) pyruvate dehydrogenase kinase, isozyme 3                     | -0.12 | AACGTTGATAGTTGAAACTGA  | NM_005391:    | NM_005391:                                                                                                                                                                                                                |
| 5165   | PK3    | (pyruvate) pyruvate dehydrogenase kinase, isozyme 3                     | 2.75  | TTCAATAGCACTAACATCCAA  | NM_005391:    | NM_005391:                                                                                                                                                                                                                |
| 5166   | PK4    | pyruvate dehydrogenase kinase, isozyme 4                                | 1.44  | ACCCGTGTCAATTAACATTTA  | NM_002612:    | NM_002612:                                                                                                                                                                                                                |
| 5166   | PK4    | pyruvate dehydrogenase kinase, isozyme 4                                | 2.40  | AGGCTCTTTGTCACATCAAA   | NM_002612:    | NM_002612:                                                                                                                                                                                                                |
| 10611  | PDLIM5 | PDZ and LIM domain 5                                                    | -1.29 | CAGCAGGAAACGAACTCCGA   | NM_006457:    | NM_001011513:NM_006457:NM_001011514:                                                                                                                                                                                      |
| 10611  | PDLIM5 | PDZ and LIM domain 5                                                    | 0.55  | TCCGATGTGCGCCATGTTAA   | NM_006457:    | NM_001011513:NM_006457:NM_001011514:                                                                                                                                                                                      |
| 9260   | PDLIM7 | (PDZ PDZ and LIM domain 7 (enigma)                                      | 0.10  | ACCAGCGCTCTCCCTCAACAA  | NM_005451:    | NM_213636:NM_203353:NM_005451:                                                                                                                                                                                            |
| 9260   | PDLIM7 | (PDZ PDZ and LIM domain 7 (enigma)                                      | -0.04 | CACCTCCAGTGCCCAACATAAA | NM_005451:    | NM_203353:NM_203353:NM_005451:                                                                                                                                                                                            |
| 57546  | PDP2   | pyruvate dehydrogenase phosphatase isoenzyme 2                          | -0.20 | CAGGAGCATCATCTGAGGAGA  | NM_020786:    | NM_020786:                                                                                                                                                                                                                |
| 57546  | PDP2   | pyruvate dehydrogenase phosphatase isoenzyme 2                          | -3.19 | TAGACAGGACAGGTTAATTTA  | NM_020786:    | NM_020786:                                                                                                                                                                                                                |
| 5170   | PDPK1  | 3-phosphoinositide dependent protein kinase-1                           | -2.52 | AAGCGGTTAGGCTGTGAGGAA  | NM_002613:    | NM_031268:NM_496112:NM_002613:                                                                                                                                                                                            |
| 5170   | PDPK1  | 3-phosphoinositide dependent protein kinase-1                           | 0.08  | CACGCTAACAGGACGATTTA   | NM_002613:    | NM_031268:NM_002613:                                                                                                                                                                                                      |
| 10630  | PDPN   | podoplanin                                                              | -0.16 | ATCGAGGATCTGCCAACTTCA  | NM_001006624: | NM_006474:NM_001006624:NM_198389:NM_001006625:                                                                                                                                                                            |
| 10630  | PDPN   | podoplanin                                                              | 0.82  | CAGGAAGTCGATAGTCTCAAA  | NM_001006624: | NM_006474:NM_001006624:NM_198389:NM_001006625:                                                                                                                                                                            |
| 55066  | PDPN   | pyruvate dehydrogenase phosphatase regulatory subunit                   | 1.23  | ACCACATAGCCAGTGATTTAA  | NM_017990:    | NM_017990:                                                                                                                                                                                                                |
| 55066  | PDPN   | pyruvate dehydrogenase phosphatase regulatory subunit                   | 0.33  | ATCTCTATCTCCTTGATATA   | NM_017990:    | NM_017990:                                                                                                                                                                                                                |
| 8566   | PDXK   | pyridoxal (pyridoxine, vitamin B6) kinase                               | -1.24 | CCGGAGCTTCATCATGATGATT | NM_003681:    | NM_003681:                                                                                                                                                                                                                |
| 8566   | PDXK   | pyridoxal (pyridoxine, vitamin B6) kinase                               | 0.18  | TCGAGTGACTTTCTAACCCAA  | NM_003681:    | NM_003681:                                                                                                                                                                                                                |
| 8566   | PDXK   | pyridoxal (pyridoxine, vitamin B6) kinase                               | -0.12 | CACAGGTTATACGAGGGACAA  | NM_003681:    | NM_003681:                                                                                                                                                                                                                |
| 8566   | PDXK   | pyridoxal (pyridoxine, vitamin B6) kinase                               | 0.52  | GAGGCTGAACAACATGAATTA  | NM_003681:    | NM_003681:                                                                                                                                                                                                                |
| 23037  | PDZD2  | PDZ domain containing 2                                                 | -3.43 | TAGGTTATTGATCACCATGAA  | NM_015022:    | NM_178140:NM_015022:                                                                                                                                                                                                      |
| 23037  | PDZD2  | PDZ domain containing 2                                                 | 0.44  | AAGCTGTGCTTACACATGAA   | NM_015022:    | NM_178140:NM_015022:                                                                                                                                                                                                      |
| 79849  | PDZD3  | PDZ domain containing 3                                                 | -0.03 | ACCGTTGCATTTGTTATAGAA  | NM_024791:    | NM_024791:                                                                                                                                                                                                                |
| 79849  | PDZD3  | PDZ domain containing 3                                                 | 0.83  | TCGGGTGTTGCTGACAGTATT  | NM_024791:    | NM_024791:                                                                                                                                                                                                                |
| 118987 | PDZD8  | PDZ domain containing 8                                                 | -0.88 | ACCGATCTGCTAGAACCTTCA  | NM_173791:    | NM_173791:                                                                                                                                                                                                                |
| 118987 | PDZD8  | PDZ domain containing 8                                                 | 0.26  | CAACATGGTGTACTACTGTA   | NM_173791:    | NM_173791:                                                                                                                                                                                                                |
| 23024  | PDZRN3 | PDZ domain containing RING finger 3                                     | 0.30  | CCCGTGGTTAACGATTTAAT   | XM_041363:    | NM_015009:                                                                                                                                                                                                                |
| 23024  | PDZRN3 | PDZ domain containing RING finger 3                                     | -0.21 | CCCGGACGGCACTAGAGTATA  | XM_041363:    | NM_015009:                                                                                                                                                                                                                |
| 8682   | PEA15  | phosphoprotein enriched in astrocytes 15                                | -0.48 | AAGGTGATTGATTGTATTGCA  | NM_003768:    | NM_003768:                                                                                                                                                                                                                |
| 8682   | PEA15  | phosphoprotein enriched in astrocytes 15                                | 0.08  | CTGGTTAGACAGTACTCTTAA  | NM_003768:    | NM_003768:                                                                                                                                                                                                                |
| 5175   | PECAM1 | platelet/endothelial cell adhesion molecule (CD31 antigen)              | 1.11  | CCCAATACACTTACAAATTGA  | NM_000442:    | NM_000442:                                                                                                                                                                                                                |
| 5175   | PECAM1 | platelet/endothelial cell adhesion molecule (CD31 antigen)              | 0.00  | TACGATTGTGTCACAGACTCA  | NM_000442:    | NM_000442:                                                                                                                                                                                                                |
| 55825  | PECR   | peroxisomal trans-2-enoyl-CoA reductase                                 | 0.57  | ATGCTTATGGTAATATTGTA   | NM_018441:    | NM_018441:                                                                                                                                                                                                                |
| 55825  | PECR   | peroxisomal trans-2-enoyl-CoA reductase                                 | -0.56 | AAGCTTATAGTTGGTATGAAA  | NM_018441:    | NM_018441:                                                                                                                                                                                                                |
| 57161  | PELLI2 | (pellin) pellino homolog 2 (Drosophila)                                 | 0.01  | CTCGGTTACAATGGTCTTTA   | NM_021255:    | NM_021255:                                                                                                                                                                                                                |
| 57161  | PELLI2 | (pellin) pellino homolog 2 (Drosophila)                                 | 0.57  | CACGTGATATAACTGGTTATA  | NM_021255:    | NM_021255:                                                                                                                                                                                                                |

|        |         |                                                                          |       |                        |            |                                |
|--------|---------|--------------------------------------------------------------------------|-------|------------------------|------------|--------------------------------|
| 53918  | PELO    | pelota homolog (Drosophila)                                              | -0.54 | ACGTACTACCATCTTGATTA   | NM_015946: | NM_015946:                     |
| 53918  | PELO    | pelota homolog (Drosophila)                                              | 0.55  | CTGAAGAGGATTAATGATTGA  | NM_015946: | NM_015946:                     |
| 27043  | PELP1   | proline, glutamic acid and leucine rich protein 1                        | 1.55  | CGGGCTGTGGTCTCTCAA     | NM_014389: | NM_014389:                     |
| 27043  | PELP1   | proline, glutamic acid and leucine rich protein 1                        | 2.49  | CAAGGTGTATGCGATATTAGA  | NM_014389: | NM_014389:                     |
| 56652  | PEO1    | progressive external ophthalmoplegia 1                                   | -3.09 | CTGGCAGGCTAGTGTAGATA   | NM_021830: | NM_021830:                     |
| 56652  | PEO1    | progressive external ophthalmoplegia 1                                   | -2.61 | TAGGATAGCTGGAGCATAAA   | NM_021830: | NM_021830:                     |
| 5184   | PEPD    | peptidase D                                                              | -1.59 | CTGCTCTTAGTAGCAAGTAA   | NM_000285: | NM_000285:                     |
| 5184   | PEPD    | peptidase D                                                              | 0.18  | TGGCATTGTGATCAGACCAA   | NM_000285: | NM_000285:                     |
| 5187   | PER1    | period homolog 1 (Drosophila)                                            | -1.10 | CCAGGGGTCATGATGACCTA   | NM_002616: | NM_002616:                     |
| 5187   | PER1    | period homolog 1 (Drosophila)                                            | -1.00 | CCGGGACTCTCCACTGTTCAA  | NM_002616: | NM_002616:                     |
| 8864   | PER2    | period homolog 2 (Drosophila)                                            | 0.49  | TCGAAAGTGGACACACACAAA  | NM_003894: | NM_003894:                     |
| 8864   | PER2    | period homolog 2 (Drosophila)                                            | -1.40 | CAGCTGGTCCAGCTTCATCAA  | NM_003894: | NM_022817:NM_003894:           |
| 8863   | PER3    | period homolog 3 (Drosophila)                                            | -2.05 | CAGGATCATTGCGCACTCATA  | NM_016831: | NM_016831:                     |
| 8863   | PER3    | period homolog 3 (Drosophila)                                            | 0.65  | AAGGTGTATAATTGGATTCAA  | NM_016831: | NM_016831:                     |
| 64065  | PERP    | PERP, TP53 apoptosis effector                                            | 0.93  | CACGTGAACTTAACACTTTA   | NM_022121: | NM_022121:                     |
| 64065  | PERP    | PERP, TP53 apoptosis effector                                            | -0.14 | TAGAATGGACTCGGCTGTGTA  | NM_022121: | NM_022121:                     |
| 5189   | PEX1    | peroxisome biogenesis factor 1                                           | -0.09 | AAGGCAGATCCGGAGCCAAA   | NM_000466: | NM_000466:                     |
| 5189   | PEX1    | peroxisome biogenesis factor 1                                           | -0.97 | CTCATGGATACTTCCAGTTA   | NM_000466: | NM_000466:                     |
| 5192   | PEX10   | peroxisome biogenesis factor 10                                          | 0.84  | ACCGTAGGCATCTTTAATAAA  | NM_002617: | NM_002617:NM_153818:           |
| 5192   | PEX10   | peroxisome biogenesis factor 10                                          | -0.20 | AAGATTTAGTCTCAGGATTA   | NM_002617: | NM_002617:NM_153818:           |
| 5194   | PEX13   | peroxisome biogenesis factor 13                                          | 0.09  | TTGACTTGGAAATCTTAGTAA  | NM_002618: | NM_002618:                     |
| 5194   | PEX13   | peroxisome biogenesis factor 13                                          | -1.15 | TACCAACCCAACTAACTAA    | NM_002618: | NM_002618:                     |
| 5195   | PEX14   | peroxisomal biogenesis factor 14                                         | 0.83  | TAGGACTGTATAAATTTGTA   | NM_004565: | NM_004565:                     |
| 5195   | PEX14   | peroxisomal biogenesis factor 14                                         | 0.02  | CGAACTCAAGTCGAAATTA    | NM_004565: | NM_004565:                     |
| 5824   | PEX19   | peroxisomal biogenesis factor 19                                         | -0.45 | ATGGGTGGCTTCATGAATTA   | NM_002857: | NM_002857:                     |
| 5824   | PEX19   | peroxisomal biogenesis factor 19                                         | 1.40  | TCCTTGAGTATTTCAATGTA   | NM_002857: | NM_002857:                     |
| 8504   | PEX3    | peroxisomal biogenesis factor 3                                          | 1.01  | ATGGTGAATCCAGAACTAT    | NM_003630: | NM_003630:                     |
| 8504   | PEX3    | peroxisomal biogenesis factor 3                                          | 1.25  | TGGGTAATCACCTATACCTA   | NM_003630: | NM_003630:                     |
| 5830   | PEX5    | peroxisomal biogenesis factor 5                                          | -4.22 | CAGCTTCTGGGAGGTGTA     | NM_000319: | NM_000319:                     |
| 5830   | PEX5    | peroxisomal biogenesis factor 5                                          | 0.08  | TACGTCAGTACCTATGATA    | NM_000319: | NM_000319:                     |
| 51555  | PEX5L   | peroxisomal biogenesis factor 5-like                                     | -0.12 | ATGGGACGATGTTAAGTTCA   | NM_016559: | NM_016559:                     |
| 51555  | PEX5L   | peroxisomal biogenesis factor 5-like                                     | 0.64  | CTCGAAATAATGTTGATCAA   | NM_016559: | NM_016559:                     |
| 5190   | PEX6    | peroxisomal biogenesis factor 6                                          | -1.61 | CAGGATGTGTTGTTGATTGGA  | NM_000287: | NM_000287:                     |
| 5190   | PEX6    | peroxisomal biogenesis factor 6                                          | -4.39 | CCAGAGCTGATTAACATGTAT  | NM_000287: | NM_000287:                     |
| 5191   | PEX7    | peroxisomal biogenesis factor 7                                          | 1.65  | TAGTTATACGTATATAGATA   | NM_000288: | NM_000288:                     |
| 5191   | PEX7    | peroxisomal biogenesis factor 7                                          | 0.04  | AAGCTGACTCTCTCTTGAA    | NM_000288: | NM_000288:                     |
| 5196   | PF4     | platelet factor 4 (chemokine (C-X-C motif) ligand 4)                     | 0.32  | CTGATTTTGTGTTTCTCTTA   | NM_002619: | NM_002619:                     |
| 5196   | PF4     | platelet factor 4 (chemokine (C-X-C motif) ligand 4)                     | 1.08  | TACGTGTGTGATTTTGCTATA  | NM_002619: | NM_002619:                     |
| 5207   | PFKFB1  | 6-phosphofructo-2-kinase/fructose-2,6-biphosphatase 1                    | 1.51  | CTCCACAAGCTCACACAGATA  | NM_002625: | NM_002625:                     |
| 5207   | PFKFB1  | 6-phosphofructo-2-kinase/fructose-2,6-biphosphatase 1                    | 1.46  | CTCGAGACCAAGATAAATAT   | NM_002625: | NM_002625:                     |
| 5208   | PFKFB2  | 6-phosphofructo-2-kinase/fructose-2,6-biphosphatase 2                    | 0.08  | CCAGAGCAAGATAGTCTACTA  | NM_006212: | NM_001018053:NM_006212:        |
| 5208   | PFKFB2  | 6-phosphofructo-2-kinase/fructose-2,6-biphosphatase 2                    | -0.37 | CGGTGACAAGCCAATCAACA   | NM_006212: | NM_006212:                     |
| 5209   | PFKFB3  | 6-phosphofructo-2-kinase/fructose-2,6-biphosphatase 3                    | -1.71 | CAGGACTTGTGCTGATCA     | NM_004566: | NM_004566:                     |
| 5209   | PFKFB3  | 6-phosphofructo-2-kinase/fructose-2,6-biphosphatase 3                    | 2.44  | CTCCAATATCATGGAAGTTAA  | NM_004566: | NM_004566:                     |
| 5210   | PFKFB4  | 6-pf 6-phosphofructo-2-kinase/fructose-2,6-biphosphatase 4               | -0.55 | ACGGAGAGCGACCATCTTTAA  | NM_004567: | NM_004567:                     |
| 5210   | PFKFB4  | 6-pf 6-phosphofructo-2-kinase/fructose-2,6-biphosphatase 4               | -1.18 | CAGAAAGTGTCTGACTTGTGA  | NM_004567: | NM_004567:                     |
| 5211   | PFKL    | phosphofructokinase, liver                                               | 0.03  | CACGATGGCTCGAAGGCCTA   | NM_002626: | NM_002626:NM_001002021:        |
| 5211   | PFKL    | phosphofructokinase, liver                                               | 0.85  | CCGGACCTACTCGCACCTGAA  | NM_002626: | NM_002626:NM_001002021:        |
| 5213   | PFKM    | phosphofructokinase, muscle                                              | 1.17  | AACAGATCAGTGCCTAATATA  | NM_000289: | NM_000289:                     |
| 5213   | PFKM    | phosphofructokinase, muscle                                              | -1.36 | AAGGACTTTCGGGAACGAGAA  | NM_000289: | NM_000289:                     |
| 5214   | PFKP    | phosphofructokinase, platelet                                            | 0.22  | CAGCACTTATGCACGTATTA   | NM_002627: | NM_002627:                     |
| 5214   | PFKP    | phosphofructokinase, platelet                                            | -0.37 | CGCCTGAAGGCTGCTTGCA    | NM_002627: | NM_002627:                     |
| 5216   | PFN1    | profilin profilin 1                                                      | -2.54 | CGGGTGGAAACGCTACATCGA  | NM_005022: | NM_005022:                     |
| 5216   | PFN1    | profilin profilin 1                                                      | -2.48 | TAGCATGGATCTCGTACCAA   | NM_005022: | NM_005022:                     |
| 5217   | PFN2    | profilin 2                                                               | 0.27  | CAGCAGATGAAATAAATTTA   | NM_002628: | NM_002628:NM_053024:           |
| 5217   | PFN2    | profilin 2                                                               | 0.91  | CTGATTTAATATGCAATTTAA  | NM_002628: | NM_002628:NM_053024:           |
| 51659  | Pls2    | DNA replication complex GINS protein PSF2                                | -4.00 | CTCCTGTTAAATCATGCTTCA  | NM_016095: | NM_016095:                     |
| 51659  | Pls2    | DNA replication complex GINS protein PSF2                                | -2.17 | CTGGGATTAACCTGAAACAA   | NM_016095: | NM_016095:                     |
| 5218   | PFTK1   | PFTAIRE protein kinase 1                                                 | -2.34 | AAGGGACACCTTTCACAGCTA  | NM_012395: | NM_012395:                     |
| 5218   | PFTK1   | PFTAIRE protein kinase 1                                                 | -0.03 | CTGGTCTTGTCAACATCTTAA  | NM_012395: | NM_012395:                     |
| 5222   | PGA5    | (pepsin) pepsinogen 5, group 1 (pepsinogen A)                            | -0.20 | GCCCACTTATGATGTATCTAA  | NM_014224: | NM_014224:                     |
| 5222   | PGA5    | (pepsin) pepsinogen 5, group 1 (pepsinogen A)                            | -1.91 | CACCATCAATGGAGTCCAGTA  | NM_014224: | NM_014224:                     |
| 5224   | PGAM2   | phosphoglycerate mutase 2 (muscle)                                       | -0.62 | CCAGGGCATCATGGAGCTGAA  | NM_000290: | NM_000290:                     |
| 5224   | PGAM2   | phosphoglycerate mutase 2 (muscle)                                       | -0.31 | CTGTCACAGCTCAGTGTGAA   | NM_000290: | NM_000290:                     |
| 80055  | PGAP1   | GPI deacylase                                                            | 0.74  | TCCATGCATTATGCAACTTTA  | NM_024989: | NM_024989:                     |
| 80055  | PGAP1   | GPI deacylase                                                            | 0.54  | TTGGTGCAGCACATTTATATA  | NM_024989: | NM_024989:                     |
| 84547  | PGBD1   | piggyBac transposable element derived 1                                  | 0.76  | CCCAAGCTAAGTGAAGCTTTA  | NM_032507: | NM_032507:                     |
| 84547  | PGBD1   | piggyBac transposable element derived 1                                  | 0.25  | CTGGTTTGGTTTGAACCTTAT  | NM_032507: | NM_032507:                     |
| 5228   | PGF     | placental growth factor, vascular endothelial growth factor-related prot | 0.64  | ACCCGGCTCGTGTATTTATTA  | NM_002632: | NM_002632:                     |
| 5228   | PGF     | placental growth factor, vascular endothelial growth factor-related prot | 0.77  | TGCOCTCATTTTATGACCAA   | NM_002632: | NM_002632:                     |
| 5229   | PGGT1B  | protein geranylgeranyltransferase type I, beta subunit                   | -0.47 | CACCTCATATGACATTTGATA  | NM_005023: | NM_005023:                     |
| 5229   | PGGT1B  | protein geranylgeranyltransferase type I, beta subunit                   | 0.01  | CTGGTATTCCTTGAATCCA    | NM_005023: | NM_005023:                     |
| 5230   | PGK1    | phosphoglycerate kinase 1                                                | 0.72  | CACAATTAAGATTAGATCAA   | NM_000291: | NM_000291:                     |
| 5230   | PGK1    | phosphoglycerate kinase 1                                                | 1.20  | GAGGAACGGATCAGATGTCTA  | NM_000291: | NM_000291:                     |
| 5232   | PGK2    | phosphoglycerate kinase 2                                                | 0.64  | CAGCAACATGTAGTTAATATA  | NM_138733: | NM_138733:                     |
| 5232   | PGK2    | phosphoglycerate kinase 2                                                | -1.81 | CAGGCCATCAGGAACCTTTAA  | NM_138733: | NM_138733:                     |
| 8993   | PGLYRP1 | peptidoglycan recognition protein 1                                      | -2.32 | GAGGTCCAACATATGTGCTCAA | NM_005091: | NM_005091:                     |
| 8993   | PGLYRP1 | peptidoglycan recognition protein 1                                      | 0.91  | TGGCATCAGCTTCTGCGCAA   | NM_005091: | NM_005091:                     |
| 114770 | PGLYRP2 | peptidoglycan recognition protein 2                                      | 0.72  | CACCTGGCAATCTCGTGCTA   | NM_052890: | NM_052890:                     |
| 114770 | PGLYRP2 | peptidoglycan recognition protein 2                                      | 0.93  | CACGCTCATTCAGGAACCTA   | NM_052890: | NM_052890:                     |
| 114771 | PGLYRP3 | peptidoglycan recognition protein 3                                      | -0.40 | CAGACTGTGCTCGAAACATA   | NM_052891: | NM_052891:                     |
| 114771 | PGLYRP3 | peptidoglycan recognition protein 3                                      | -0.40 | CAGGATGGTGGCGGTATGAA   | NM_052891: | NM_052891:                     |
| 57115  | PGLYRP4 | peptidoglycan recognition protein 4                                      | 1.15  | TCAGCAGTGTCTGAAAATTTAA | NM_020393: | NM_020393:                     |
| 57115  | PGLYRP4 | peptidoglycan recognition protein 4                                      | -4.82 | CAGCGAAGTATGGCATCATTAA | NM_020393: | NM_020393:                     |
| 5239   | PGM5    | phosphoglucomutase 5                                                     | -1.56 | CAGACTGTACGAGAGAGCTA   | NM_021965: | NM_021965:                     |
| 5239   | PGM5    | phosphoglucomutase 5                                                     | -0.01 | CTCATTATTGCTGCCCGGAA   | NM_021965: | NM_021965:                     |
| 54858  | PGPEP1  | pyroglutamyl-peptidase 1                                                 | -0.09 | CTCCTTAGAGATAATAACTT   | NM_017712: | NM_017712:                     |
| 54858  | PGPEP1  | pyroglutamyl-peptidase 1                                                 | -6.88 | CAGAGGTCTGGTGGAAAGCAA  | NM_017712: | NM_017712:                     |
| 5241   | PGR     | progesterone receptor                                                    | 0.20  | CACAGCGTTTCTATCAACTTA  | NM_000926: | NM_000926:                     |
| 5241   | PGR     | progesterone receptor                                                    | -0.34 | CTGCCTCTCAATCAGCCCTTA  | NM_000926: | NM_000926:                     |
| 10857  | PGRMC1  | progesterone receptor membrane component 1                               | 0.52  | ATCACTAGTGACACTAATAAA  | NM_006667: | NM_006667:                     |
| 10857  | PGRMC1  | progesterone receptor membrane component 1                               | 0.72  | CAAACTGTAATTTGGTTAA    | NM_006667: | NM_006667:                     |
| 10424  | PGRMC2  | progesterone receptor membrane component 2                               | -0.55 | CAAGATAAATTAATCTACTA   | NM_006320: | NM_006320:                     |
| 10424  | PGRMC2  | progesterone receptor membrane component 2                               | -0.11 | CCGGCGGTCCATATGGAATA   | NM_006320: | NM_006320:                     |
| 54681  | PH-4    | hypoxia-inducible factor prolyl 4-hydroxylase                            | -1.05 | CAGGGCCATGGCATTAACTAA  | NM_017732: | NM_017732:                     |
| 54681  | PH-4    | hypoxia-inducible factor prolyl 4-hydroxylase                            | 2.46  | AACCAATGCAACTCACAGTAA  | NM_017732: | NM_017732:                     |
| 5245   | PHB     | (prohibiti)prohibitin                                                    | 1.34  | AAGGAAACAAATGTGTATAAA  | NM_002634: | NM_002634:                     |
| 5245   | PHB     | (prohibiti)prohibitin                                                    | 0.82  | TGGGAAGAAACAAATGTGTA   | NM_002634: | NM_002634:                     |
| 5245   | PHB     | (prohibiti)prohibitin                                                    | -1.57 | AGTGAAGAAATAAAGGTAAA   | NM_496437: | NM_497140:NM_002634:NM_496437: |

|        |                                                  |                                                                     |       |                        |            |                         |
|--------|--------------------------------------------------|---------------------------------------------------------------------|-------|------------------------|------------|-------------------------|
| 11331  | PHB2                                             | prohibitin 2                                                        | -2.77 | AACCCAGGAATTCTCAATAAA  | NM_007273: | NM_007273:              |
| 11331  | PHB2                                             | prohibitin 2                                                        | -2.25 | CACAGCTGGTGTAGAAGCCAA  | NM_007273: | NM_007273:              |
| 5251   | PHEX                                             | phosphate regulating endopeptidase homolog, X-linked (hypophosphase | -1.59 | CTGGCCCGTGGTGAATCTAA   | NM_000444: | NM_000444:              |
| 5251   | PHEX                                             | phosphate regulating endopeptidase homolog, X-linked (hypophosphase | 2.55  | CCGGAAGATATGCCAAGCTAT  | NM_000444: | NM_000444:              |
| 5252   | PHF1                                             | PHD finger protein 1                                                | 0.13  | ACTCTGTATGATTGAAATAAA  | NM_002636: | NM_024165:NM_002636:    |
| 5252   | PHF1                                             | PHD finger protein 1                                                | -1.81 | CCCGACTCTGTATGATTGAA   | NM_002636: | NM_024165:NM_002636:    |
| 55274  | PHF10                                            | PHD finger protein 10                                               | -3.69 | ATGGCAGTGTATGGAATGTAA  | NM_018288: | NM_133325:NM_018288:    |
| 55274  | PHF10                                            | PHD finger protein 10                                               | 0.79  | TCAGGGAAGACAGAAATCAA   | NM_018288: | NM_133325:NM_018288:    |
| 51131  | PHF11                                            | PHD finger protein 11                                               | -2.22 | ACAGCCCATGATAGCCCTTA   | NM_016119: | NM_016119:              |
| 51131  | PHF11                                            | PHD finger protein 11                                               | 2.26  | GAGATCTTATGTCAAGTCTTA  | NM_016119: | NM_016119:              |
| 57649  | PHF12                                            | PHD finger protein 12                                               | 0.67  | CACAATGGTCTCGTTCCTTA   | NM_020889: | NM_020889:NM_00103561:  |
| 57649  | PHF12                                            | PHD finger protein 12                                               | -3.73 | CAGGTTCTAGCAAGAGGAGAA  | NM_020889: | NM_020889:NM_00103561:  |
| 148479 | PHF13                                            | PHD finger protein 13                                               | -0.12 | ATGGCCCGTGTTCATAACTCA  | NM_153812: | NM_153812:              |
| 148479 | PHF13                                            | PHD finger protein 13                                               | -0.03 | CAGCTGGTGGTCTTAGGTTT   | NM_153812: | NM_153812:              |
| 9678   | PHF14 (PHD)                                      | PHD finger protein 14                                               | -2.74 | CAGAAGTACTGATCATACCA   | XM_376578: | NM_001007157:NM_014660: |
| 9678   | PHF14 (PHD)                                      | PHD finger protein 14                                               | -0.60 | AAGAAGTACTATCATCAGAAA  | XM_376578: | NM_001007157:NM_014660: |
| 23338  | PHF15                                            | PHD finger protein 15                                               | -0.63 | AACCCCTAACGAGCAATAGAA  | NM_015288: | NM_015288:              |
| 23338  | PHF15                                            | PHD finger protein 15                                               | -0.30 | ATGACAAGGATAATGTGCAA   | NM_015288: | NM_015288:              |
| 9767   | PHF16                                            | PHD finger protein 16                                               | -0.06 | ACCATGATTATCAGACACTAA  | NM_014735: | NM_014735:              |
| 9767   | PHF16                                            | PHD finger protein 16                                               | -1.46 | CACCAATAGGTGGTGAAGAA   | NM_014735: | NM_014735:              |
| 79960  | PHF17                                            | PHD finger protein 17                                               | 0.16  | ACCATTAAATTCATTAGTGT   | NM_024900: | NM_024900:              |
| 79960  | PHF17                                            | PHD finger protein 17                                               | 1.00  | CGCCAGAGCAAGAAATGATA   | NM_024900: | NM_024900:              |
| 26147  | PHF19                                            | PHD finger protein 19                                               | 1.30  | CAGCATTTCTATCATACCAGA  | XM_045308: | NM_015651:              |
| 26147  | PHF19                                            | PHD finger protein 19                                               | -0.10 | CCTCGTACTTCGAAAGATAA   | XM_045308: | NM_001009936:NM_015651: |
| 51230  | PHF20                                            | PHD finger protein 20                                               | 0.38  | ATGAATTATAGGCAAGTATA   | NM_016436: | NM_016436:              |
| 51230  | PHF20                                            | PHD finger protein 20                                               | 1.46  | AGGCACCTTTGGAATAGTTAA  | NM_016436: | NM_016436:              |
| 51105  | PHF20L1                                          | PHD finger protein 20-like 1                                        | -1.28 | ACGGAAATTTAGGDTATTTAA  | NM_016018: | NM_016018:              |
| 51105  | PHF20L1                                          | PHD finger protein 20-like 1                                        | -0.30 | CAGCTGAAGATTTGGAATACTA | NM_016018: | NM_016018:              |
| 51317  | PHF21A                                           | PHD finger protein 21A                                              | -0.20 | ACCATGCCAAGTGAATAATA   | NM_016621: | NM_016621:              |
| 51317  | PHF21A                                           | PHD finger protein 21A                                              | -5.22 | ACCGACAAGTCCAAATACA    | NM_016621: | NM_016621:              |
| 112885 | PHF21B                                           | PHD finger protein 21B                                              | 0.38  | TCGGGAGAAAATGTGCTGTA   | NM_138415: | NM_138415:              |
| 112885 | PHF21B                                           | PHD finger protein 21B                                              | 0.18  | TTGTGAGATATTTAATGTGAA  | NM_138415: | NM_138415:              |
| 57117  | PHF22                                            | PHD finger protein 22                                               | -5.99 | CAGGACCTAGTGAAGTACTA   | NM_020395: | NM_020395:              |
| 57117  | PHF22                                            | PHD finger protein 22                                               | 0.15  | TACGCCACTGTACCTTTAAA   | NM_020395: | NM_020395:              |
| 79142  | PHF23                                            | PHD finger protein 23                                               | 2.15  | AGCCTGGTGTGTTGAAATAAA  | NM_024297: | NM_024297:              |
| 79142  | PHF23                                            | PHD finger protein 23                                               | -0.31 | CAGCTCAAAGTGGAGTACTA   | NM_024297: | NM_024297:              |
| 84295  | PHF6                                             | PHD finger protein 6                                                | -0.05 | CTCTTTTCCATGTTATACAA   | NM_032458: | NM_001015877:NM_032458: |
| 84295  | PHF6                                             | PHD finger protein 6                                                | -1.09 | TAAGATATTCACACCTCTCAA  | NM_032458: | NM_032458:              |
| 51533  | PHF7                                             | PHD finger protein 7                                                | -2.90 | CGCAAGTGCATACAGAAATA   | NM_016483: | NM_173341:NM_016483:    |
| 21313  | PHF8                                             | PHD finger protein 8                                                | -3.78 | CTGTCTTATCTTATCTAGTAA  | NM_016483: | NM_173341:NM_016483:    |
| 21313  | PHF8                                             | PHD finger protein 8                                                | -1.51 | GAGGATTTCTATTACCTTTA   | NM_015107: | NM_015107:              |
| 21313  | PHF8                                             | PHD finger protein 8                                                | -2.25 | TCGGGCAACCAAGATAGCAAA  | NM_015107: | NM_015107:              |
| 26227  | PHGDH                                            | phosphoglycerate dehydrogenase                                      | -0.02 | CAGCAATAACCGTCTAATAAA  | NM_006623: | NM_006623:              |
| 26227  | PHGDH                                            | phosphoglycerate dehydrogenase                                      | -0.37 | CAGCACAGCTTCTGCTGAATGA | NM_006623: | NM_006623:              |
| 337867 | PHGDHL1                                          | phosphoglycerate dehydrogenase like 1                               | -0.10 | GAGGGTAAATGTTACTCACA   | NM_177967: | NM_177967:              |
| 337867 | PHGDHL1                                          | phosphoglycerate dehydrogenase like 1                               | -1.29 | TGCCATTACATTAGCATGTAT  | NM_177967: | NM_177967:              |
| 55023  | PHIP                                             | pleckstrin homology domain interacting protein                      | 1.58  | CAGCACGTTATTTGGCAATTA  | NM_017934: | NM_017934:              |
| 55023  | PHIP                                             | pleckstrin homology domain interacting protein                      | 0.41  | CACATGAGAATCAGAAATCAA  | NM_017934: | NM_017934:              |
| 5255   | PHKA1                                            | phosphorylase kinase, alpha 1 (muscle)                              | -0.90 | ATGGGAGTGCTTGGAACTTCA  | NM_002637: | NM_002637:              |
| 5255   | PHKA1                                            | phosphorylase kinase, alpha 1 (muscle)                              | 0.30  | CCCAATCGTCTGACTATGAA   | NM_002637: | NM_002637:              |
| 5256   | PHKA2                                            | phosphorylase kinase, alpha 2 (liver)                               | -3.96 | CGCCTAACAAAGTAGATGAA   | NM_000292: | NM_000292:              |
| 5256   | PHKA2                                            | phosphorylase kinase, alpha 2 (liver)                               | -0.27 | CGGATTTCTTAGTACATATA   | NM_000292: | NM_000292:              |
| 5257   | PHKB                                             | phosphorylase kinase, beta                                          | -2.70 | AGGGCTGTCTGGTTCAGTTA   | NM_000293: | NM_001031835:NM_000293: |
| 5257   | PHKB                                             | phosphorylase kinase, beta                                          | 1.15  | TCGATGGTCTTTGAAATGAA   | NM_000293: | NM_001031835:NM_000293: |
| 5260   | PHKG1                                            | phosphorylase kinase, gamma 1 (muscle)                              | -1.22 | CAAGAGCCTGCAAGCACTTAA  | NM_006213: | NM_006213:              |
| 5260   | PHKG1                                            | phosphorylase kinase, gamma 1 (muscle)                              | -0.19 | CGGGAGATGCTCATCCGAGA   | NM_006213: | NM_006213:              |
| 5261   | PHKG2 (phosphorylase kinase, gamma 2 (testis)    |                                                                     | 2.09  | CTGCATGCATGCAATGAAA    | NM_000294: | NM_000294:              |
| 5261   | PHKG2 (phosphorylase kinase, gamma 2 (testis)    |                                                                     | 2.32  | TACGGGCACTGGTAAAGAAA   | NM_000294: | NM_000294:              |
| 7262   | PHLDA2                                           | pleckstrin homology-like domain, family A, member 2                 | 0.43  | CGCGTCCGGACAGCATGAAA   | NM_003311: | NM_003311:              |
| 7262   | PHLDA2                                           | pleckstrin homology-like domain, family A, member 2                 | -4.79 | CTGGTTCTTTGTAGTCACATA  | NM_003311: | NM_003311:              |
| 162466 | PHOSPHO1 (phosphatase, orphan 1)                 |                                                                     | -2.14 | CGCCAACATGTGCAAGCACAA  | NM_178500: | NM_178500:              |
| 162466 | PHOSPHO1 (phosphatase, orphan 1)                 |                                                                     | 0.98  | TCGGTCCGGACAGCCAGTAA   | NM_178500: | NM_178500:              |
| 29085  | PHPT1                                            | phosphohistidine phosphatase 1                                      | 0.36  | CACGCCATTTCAACTGAGAAA  | NM_014172: | NM_014172:              |
| 29085  | PHPT1                                            | phosphohistidine phosphatase 1                                      | -1.58 | TCGGCCGACATGCAGAGCAA   | NM_014172: | NM_014172:              |
| 5264   | PHYH                                             | phytanoyl-CoA 2-hydroxylase                                         | -1.51 | TAGCGTGAATTTGCAAGATAT  | NM_006214: | NM_001037537:NM_006214: |
| 5264   | PHYH                                             | phytanoyl-CoA 2-hydroxylase                                         | 0.00  | TTGCCACTACTTGCAGTGAA   | NM_006214: | NM_001037537:NM_006214: |
| 55300  | PI4K2B                                           | phosphatidylinositol 4-kinase type 2 beta                           | 1.54  | ATGAACCTTTGCAAGATTTA   | NM_018323: | NM_018323:              |
| 55300  | PI4K2B                                           | phosphatidylinositol 4-kinase type 2 beta                           | 0.29  | CAGAGTACTGGCCCTGTTCAA  | NM_018323: | NM_018323:              |
| 55361  | PI4KII                                           | phosphatidylinositol 4-kinase type II                               | -0.08 | ACGCAAATGTATGAATAACAA  | NM_018425: | NM_018425:              |
| 55361  | PI4KII                                           | phosphatidylinositol 4-kinase type II                               | -1.96 | CGGCATCGGGCTACCACCAAA  | NM_018425: | NM_018425:              |
| 8554   | PIAS1                                            | protein inhibitor of activated STAT, 1                              | -1.14 | CGGATCATCTAGAGCTTTA    | NM_016166: | NM_016166:              |
| 8554   | PIAS1                                            | protein inhibitor of activated STAT, 1                              | -2.53 | ACGAGCAAAAGGGAATAAGGAA | NM_016166: | NM_016166:              |
| 27124  | PIB5PA                                           | phosphatidylinositol (4,5) bisphosphate 5-phosphatase, A            | 0.79  | CAGGTAACATTCAGTGAAGAA  | NM_014422: | NM_014422:NM_001002837: |
| 27124  | PIB5PA                                           | phosphatidylinositol (4,5) bisphosphate 5-phosphatase, A            | 0.30  | CTGGACTGGATCGGCTTATA   | NM_014422: | NM_014422:NM_001002837: |
| 8301   | PICALM                                           | phosphatidylinositol binding clathrin assembly protein              | -0.55 | AAGAAGGCTTGCATCTATA    | NM_007166: | NM_001008660:NM_007166: |
| 8301   | PICALM                                           | phosphatidylinositol binding clathrin assembly protein              | 0.44  | CACGTTGTCTTAACTTAAGCAA | NM_007166: | NM_001008660:NM_007166: |
| 9463   | PICK1                                            | protein interacting with PRKCA 1                                    | -0.28 | CGGTTGCAATGGCAGGTCAA   | NM_012407: | NM_012407:              |
| 9463   | PICK1                                            | protein interacting with PRKCA 1                                    | -1.62 | TCGCCCTACCATGAAGAAGTA  | NM_012407: | NM_012407:              |
| 10026  | PIGK                                             | phosphatidylinositol glycan, class K                                | 0.60  | GCAAACCTGGATAAATTTA    | NM_005482: | NM_005482:              |
| 10026  | PIGK                                             | phosphatidylinositol glycan, class K                                | 0.36  | ATGGCTCTAGCTAGTGTCAA   | NM_005482: | NM_005482:              |
| 5284   | PIGR (polymere polymeric immunoglobulin receptor |                                                                     | 0.68  | CAGGAAGAATACGCCCTGATA  | NM_002644: | NM_002644:              |
| 5284   | PIGR (polymere polymeric immunoglobulin receptor |                                                                     | -0.31 | TACAACCGTAAGGAAAGCAAA  | NM_002644: | NM_002644:              |
| 118788 | PIK3AP1                                          | phosphoinositide-3-kinase adaptor protein 1                         | -0.77 | ATGCTCAAGAGTCACATTTAAA | NM_152309: | NM_152309:              |
| 118788 | PIK3AP1                                          | phosphoinositide-3-kinase adaptor protein 1                         | -1.94 | CAGCAGGGTATTTAAGTGCTA  | NM_152309: | NM_152309:              |
| 5286   | PIK3C2A                                          | phosphoinositide-3-kinase, class 2, alpha polypeptide               | 0.68  | CAAGATGGTCCGAATCAAGGAA | NM_002645: | NM_002645:              |
| 5286   | PIK3C2A                                          | phosphoinositide-3-kinase, class 2, alpha polypeptide               | 2.23  | TACCCACTAATTTGCAATGGAA | NM_002645: | NM_002645:              |
| 5287   | PIK3C2B                                          | phosphoinositide-3-kinase, class 2, beta polypeptide                | -9.82 | AAGGTTGTCTTCTCCGCCAA   | NM_002646: | NM_002646:              |
| 5287   | PIK3C2B                                          | phosphoinositide-3-kinase, class 2, beta polypeptide                | -0.90 | CAGGGTGGTCCAGTCCGTCAA  | NM_002646: | NM_002646:              |
| 5288   | PIK3C2G                                          | phosphoinositide-3-kinase, class 2, gamma polypeptide               | 1.20  | CCAGATCAAGAAATTCGTAAA  | NM_004570: | NM_004570:              |
| 5288   | PIK3C2G                                          | phosphoinositide-3-kinase, class 2, gamma polypeptide               | 0.27  | CCCGTAGAAATGATAAATTTA  | NM_004570: | NM_004570:              |
| 5289   | PIK3C3                                           | phosphoinositide-3-kinase, class 3                                  | 0.17  | AACGGCAAGTGGAAATCGTGA  | NM_002647: | NM_002647:              |
| 5289   | PIK3C3                                           | phosphoinositide-3-kinase, class 3                                  | 2.20  | TCGGTTGGTGGATCTAATGAA  | NM_002647: | NM_002647:              |
| 5290   | PIK3CA                                           | phosphoinositide-3-kinase, catalytic, alpha polypeptide             | -2.79 | CTCTGAGTCAAGTATAGTATA  | NM_006218: | NM_006218:              |
| 5290   | PIK3CA                                           | phosphoinositide-3-kinase, catalytic, alpha polypeptide             | -1.53 | CTGAGTCAGTATAAGTATATA  | NM_006218: | NM_006218:              |
| 5291   | PIK3CB                                           | phosphoinositide-3-kinase, catalytic, beta polypeptide              | 0.03  | CCCTCGATAAGATTTAATGAA  | NM_006219: | NM_006219:              |
| 5291   | PIK3CB                                           | phosphoinositide-3-kinase, catalytic, beta polypeptide              | 1.14  | TGGGAAGTCAACATTTCTTA   | NM_006219: | NM_006219:              |
| 5293   | PIK3CD                                           | phosphoinositide-3-kinase, catalytic, delta polypeptide             | -5.49 | CGGTCACGCATGAAGGCCAAA  | NM_005026: | NM_005026:              |
| 5293   | PIK3CD                                           | phosphoinositide-3-kinase, catalytic, delta polypeptide             | -0.27 | CGCGTGATCGAAGAGCCAAA   | NM_005026: | NM_005026:              |
| 5294   | PIK3CG                                           | phosphoinositide-3-kinase, catalytic, gamma polypeptide             | -1.86 | ATCGAAGTTGCAAGAGACAAA  | NM_002649: | NM_002649:              |

|        |                                                                                    |                                                                 |       |                        |               |                                |
|--------|------------------------------------------------------------------------------------|-----------------------------------------------------------------|-------|------------------------|---------------|--------------------------------|
| 5294   | PIK3CG                                                                             | phosphoinositide-3-kinase, catalytic, gamma polypeptide         | 1.13  | CACCTTACTCTAACTCAA     | NM_002649:    | NM_002649:                     |
| 5295   | PIK3R1                                                                             | phosphoinositide-3-kinase, regulatory subunit 1 (p85 alpha)     | -4.50 | CAGCATTAAACCAGACCTTAT  | NM_181504:    | NM_181523;NM_181504;NM_181524: |
| 5295   | PIK3R1                                                                             | phosphoinositide-3-kinase, regulatory subunit 1 (p85 alpha)     | -4.09 | TAGCTGGTTATGAAGCTAGTAA | NM_181504:    | NM_181523;NM_181504;NM_181524: |
| 5296   | PIK3R2                                                                             | phosphoinositide-3-kinase, regulatory subunit 2 (p85 beta)      | -0.52 | CCGGAGTATGACCAGCTTTTA  | NM_005027:    | NM_005027:                     |
| 5296   | PIK3R2                                                                             | phosphoinositide-3-kinase, regulatory subunit 2 (p85 beta)      | 1.45  | TTGGTACGTGGGCAAGATCAA  | NM_005027:    | NM_005027:                     |
| 8503   | PIK3R3                                                                             | phosphoinositide-3-kinase, regulatory subunit 3 (p55, gamma)    | 2.00  | AGGGAGCAATAAAGTTAA     | NM_003629:    | NM_003629:                     |
| 8503   | PIK3R3                                                                             | phosphoinositide-3-kinase, regulatory subunit 3 (p55, gamma)    | 0.50  | GAGGATATCAATCGAGTACAA  | NM_003629:    | NM_003629:                     |
| 30849  | PIK3R4                                                                             | phosphoinositide-3-kinase, regulatory subunit 4, p150           | 0.42  | AAGCAGAATCTAGATCAGAA   | NM_014602:    | NM_014602:                     |
| 30849  | PIK3R4                                                                             | phosphoinositide-3-kinase, regulatory subunit 4, p150           | 0.15  | TAGAGGCAGAAAGATTACTTAA | NM_014602:    | NM_014602:                     |
| 23533  | PIK3R5                                                                             | phosphoinositide-3-kinase, regulatory subunit 5, p101           | 0.63  | ACGGGTGCTGCTGCAACTCTA  | NM_014308:    | NM_014308:                     |
| 23533  | PIK3R5                                                                             | phosphoinositide-3-kinase, regulatory subunit 5, p101           | -1.25 | ATCCGAGATCAAAGTGACAA   | NM_014308:    | NM_014308:                     |
| 5297   | PIK4CA                                                                             | phosphatidylinositol 4-kinase, catalytic, alpha polypeptide     | -1.29 | CATCTGGAACATGAAGACTAA  | NM_002650:    | NM_058004;NM_002650:           |
| 5297   | PIK4CA                                                                             | phosphatidylinositol 4-kinase, catalytic, alpha polypeptide     | -0.41 | CCAGTTTCATCGAACATGAA   | NM_002650:    | NM_058004;NM_002650:           |
| 5298   | PIK4CB                                                                             | phosphatidylinositol 4-kinase, catalytic, beta polypeptide      | 0.01  | CCGAGAGTATTGATAATTGAT  | NM_002651:    | NM_002651:                     |
| 5298   | PIK4CB                                                                             | phosphatidylinositol 4-kinase, catalytic, beta polypeptide      | 0.31  | TCGGTGATAGTGGCATGATT   | NM_002651:    | NM_002651:                     |
| 29992  | PILRA                                                                              | paired immunoglobulin-like type 2 receptor alpha                | 1.21  | GACCCTGTACTCTGTCTTAA   | NM_013439:    | NM_178272;NM_178273;NM_013439: |
| 29992  | PILRA                                                                              | paired immunoglobulin-like type 2 receptor alpha                | 0.21  | CAGCCGAGGAACCTCCAAA    | NM_013439:    | NM_178272;NM_013439:           |
| 29990  | PILRB                                                                              | paired immunoglobulin-like type 2 receptor beta                 | -0.06 | TACGTATTCTGGCCCTCA     | NM_013440:    | NM_013440:                     |
| 29990  | PILRB                                                                              | paired immunoglobulin-like type 2 receptor beta                 | 0.33  | TTGGTGTATCTCTCGAGTTA   | NM_013440:    | NM_175047;NM_013440:           |
| 5292   | PIM1                                                                               | pim-1 oncogene                                                  | -2.02 | AAACATCCTTTCGACCTCAA   | NM_002648:    | NM_002648:                     |
| 5292   | PIM1                                                                               | pim-1 oncogene                                                  | 1.52  | AAAGATTGATAGTGGATCTAAT | NM_002648:    | NM_002648:                     |
| 11040  | PIM2 (pim-2 c pim-2 oncogene                                                       |                                                                 | 0.32  | CAGGTATTACCAAGCTAATA   | NM_006875:    | NM_006875:                     |
| 11040  | PIM2 (pim-2 c pim-2 oncogene                                                       |                                                                 | -0.06 | CCGGATTGTCCAATTACTAA   | NM_006875:    | NM_006875:                     |
| 415116 | PIM3                                                                               | pim-3 oncogene                                                  | -0.07 | ATGAACATGTATAGTGGCTAA  | NM_001001852: | NM_001001852:                  |
| 415116 | PIM3                                                                               | pim-3 oncogene                                                  | -0.03 | CTGTCAGAAGATGAACATGTA  | NM_001001852: | NM_001001852:                  |
| 5300   | PIN1                                                                               | protein (peptidylprolyl cis/trans isomerase) NIMA-interacting 1 | 0.04  | CAGTATTTATTTGCCACAA    | NM_006221:    | NM_006221:                     |
| 5300   | PIN1                                                                               | protein (peptidylprolyl cis/trans isomerase) NIMA-interacting 1 | 0.39  | GACCAGCAGATTCCTCCATA   | NM_006221:    | NM_006221:                     |
| 65018  | PINK1                                                                              | PTEN induced putative kinase 1                                  | 1.41  | CCGACGCTGTCTCCGTGAT    | NM_032409:    | NM_032409:                     |
| 65018  | PINK1                                                                              | PTEN induced putative kinase 1                                  | 0.00  | GACCGTGTCTCCGTGATGAA   | NM_032409:    | NM_032409:                     |
| 8394   | PIPSK1A (phosphatidylinositol 4-phosphate 5-kinase, type I, alpha                  |                                                                 | -1.20 | CAGCTCTTGATGTAATCCA    | NM_003557:    | NM_003557:                     |
| 8394   | PIPSK1A (phosphatidylinositol 4-phosphate 5-kinase, type I, alpha                  |                                                                 | 0.02  | CCCTGCCCTTGATATATGTTA  | NM_003557:    | NM_003557:                     |
| 8395   | PIPSK1B                                                                            | phosphatidylinositol 4-phosphate 5-kinase, type I, beta         | -1.15 | AAGGCTCAACGTATAAGCGAA  | NM_003558:    | NM_003558;NM_001031687:        |
| 8395   | PIPSK1B                                                                            | phosphatidylinositol 4-phosphate 5-kinase, type I, beta         | 0.54  | CAGGCTTACACTCTATTCAA   | NM_003558:    | NM_003558;NM_001031687:        |
| 23396  | PIPSK1C                                                                            | phosphatidylinositol 4-phosphate 5-kinase, type I, gamma        | -1.08 | CCGGTCTGGTGCATGAACAA   | NM_012398:    | NM_012398:                     |
| 23396  | PIPSK1C                                                                            | phosphatidylinositol 4-phosphate 5-kinase, type I, gamma        | 1.29  | CGGCAAGACCTATTTATAATA  | NM_012398:    | NM_012398:                     |
| 5305   | PIPSK2A                                                                            | phosphatidylinositol 4-phosphate 5-kinase, type II, alpha       | -0.28 | ATGGAATTAAGTGCATGAA    | NM_005028:    | NM_005028:                     |
| 5305   | PIPSK2A                                                                            | phosphatidylinositol 4-phosphate 5-kinase, type II, alpha       | -0.31 | CTGCCGATGGTCTCCGTAA    | NM_005028:    | NM_005028:                     |
| 8396   | PIPSK2B                                                                            | phosphatidylinositol 4-phosphate 5-kinase, type II, beta        | -1.10 | CACGCCATACGATCAAAAGAA  | NM_003559:    | NM_003559:                     |
| 8396   | PIPSK2B                                                                            | phosphatidylinositol 4-phosphate 5-kinase, type II, beta        | -1.68 | CGCTTTAAGTTAAGGAGTA    | NM_003559:    | NM_003559;NM_138687:           |
| 79837  | PIPSK2C                                                                            | phosphatidylinositol 4-phosphate 5-kinase, type II, gamma       | -0.35 | CCGAGCAGTATGCTAAGCGA   | NM_024779:    | NM_024779:                     |
| 79837  | PIPSK2C                                                                            | phosphatidylinositol 4-phosphate 5-kinase, type II, gamma       | 0.27  | TTGATGTGATAATCTCATA    | NM_024779:    | NM_024779:                     |
| 138429 | PIPSK1L                                                                            | phosphatidylinositol 4-phosphate 5-kinase-like 1                | 0.16  | AAGTCTCCACGAGGATGAGA   | NM_173492:    | NM_173492:                     |
| 138429 | PIPSK1L                                                                            | phosphatidylinositol 4-phosphate 5-kinase-like 1                | 0.13  | AAGTGAAGTTCAGTACCACC   | NM_173492:    | NM_173492:                     |
| 9600   | PITPNM1                                                                            | phosphatidylinositol transfer protein, membrane-associated 1    | -0.77 | CAGCGGCAATACACACACAA   | NM_004910:    | NM_004910:                     |
| 9600   | PITPNM1                                                                            | phosphatidylinositol transfer protein, membrane-associated 1    | -0.31 | CCAGGCGAGTACAAGCAGAA   | NM_004910:    | NM_004910:                     |
| 57605  | PITPNM2                                                                            | phosphatidylinositol transfer protein, membrane-associated 2    | -1.32 | ACGGGAAGGTTGGACTCCAA   | NM_020845:    | NM_020845:                     |
| 57605  | PITPNM2                                                                            | phosphatidylinositol transfer protein, membrane-associated 2    | 2.17  | CTCGAGTTTCTCAACTGTCCA  | NM_020845:    | NM_020845:                     |
| 83394  | PITPNM3                                                                            | PITPNM family member 3                                          | -0.61 | CCGGGAAAGTGGCTTCGTAA   | NM_031220:    | NM_031220:                     |
| 83394  | PITPNM3                                                                            | PITPNM family member 3                                          | -4.73 | CACGAGGACATCTCTGTCTA   | NM_031220:    | NM_031220:                     |
| 10531  | PITRM1                                                                             | pitrylin metallopeptidase 1                                     | -0.46 | CCGGTGAATTACGTGGGTGAA  | NM_014889:    | NM_014889:                     |
| 10531  | PITRM1                                                                             | pitrylin metallopeptidase 1                                     | 1.56  | TCCGATTTGAACCCACATA    | NM_014889:    | NM_014889:                     |
| 5309   | PITX3                                                                              | paired-like homeodomain transcription factor 3                  | 0.77  | TTCAAAGATAAATGAAATAA   | NM_005029:    | NM_005029:                     |
| 5309   | PITX3                                                                              | paired-like homeodomain transcription factor 3                  | -0.02 | CAGCCTGCGGCTCAAAGCCAA  | NM_005029:    | NM_005029:                     |
| 64219  | PJAJ1                                                                              | praja 1                                                         | -1.81 | CCGGAGTCTGGTCACTGAA    | NM_022368:    | NM_145119;NM_01032396:         |
| 64219  | PJAJ1                                                                              | praja 1                                                         | -0.04 | CAGTATGATTAACAATAA     | NM_022368:    | NM_145119;NM_01032396:         |
| 9867   | PJAJ2                                                                              | praja 2, RING-H2 motif containing                               | 0.05  | CTGGCAAGTTCAGACTACTAA  | NM_014819:    | NM_014819:                     |
| 9867   | PJAJ2                                                                              | praja 2, RING-H2 motif containing                               | 0.10  | TTGGCAGATATGAGGCTTAA   | NM_014819:    | NM_014819:                     |
| 5310   | PKD1                                                                               | polycystic kidney disease 1 (autosomal dominant)                | -1.05 | CCCGTCCATTTGGGGTAGCAA  | NM_000296:    | NM_001009944;NM_000296:        |
| 5310   | PKD1                                                                               | polycystic kidney disease 1 (autosomal dominant)                | 0.02  | CTGGTCTCAGCCACGTACAA   | NM_000296:    | NM_001009944;NM_000296:        |
| 168507 | PKD1L1                                                                             | polycystic kidney disease 1 like 1                              | -0.48 | CAGGTTGACCTCAAAGCTTGA  | NM_138295:    | NM_138295:                     |
| 168507 | PKD1L1                                                                             | polycystic kidney disease 1 like 1                              | -0.08 | AACGAGTTTCATGGAACCGAA  | NM_138295:    | NM_138295:                     |
| 114780 | PKD1L2                                                                             | polycystic kidney disease 1-like 2                              | -1.68 | CAGGGCAAGCGCATGAGTAAA  | NM_052892:    | NM_182740;NM_052892:           |
| 114780 | PKD1L2                                                                             | polycystic kidney disease 1-like 2                              | 0.17  | CCGTTTGGTGAATGACACAA   | NM_052892:    | NM_182740;NM_052892:           |
| 342372 | PKD1L3 (poly polycystic kidney disease 1-like 3                                    |                                                                 | 0.31  | CAGCTGGATGATTGCAATTA   | NM_181536:    | NM_181536:                     |
| 342372 | PKD1L3 (poly polycystic kidney disease 1-like 3                                    |                                                                 | 0.06  | ACGGAGATGCCCATATGAAA   | NM_181536:    | NM_181536:                     |
| 5311   | PKD2                                                                               | polycystic kidney disease 2 (autosomal dominant)                | 0.00  | CTCGACAATCAGAATGTTAT   | NM_000297:    | NM_000297:                     |
| 5311   | PKD2                                                                               | polycystic kidney disease 2 (autosomal dominant)                | 0.49  | CCCTGTGACTGGTATTATTA   | NM_000297:    | NM_000297:                     |
| 9033   | PKD2L1                                                                             | polycystic kidney disease 2-like 1                              | -0.25 | CAGATTGATGCTGAGGCTCA   | NM_016112:    | NM_016112:                     |
| 9033   | PKD2L1                                                                             | polycystic kidney disease 2-like 1                              | 1.08  | CGCCTGGATCAAGATATTCAA  | NM_016112:    | NM_016112:                     |
| 27039  | PKD2L2 (poly polycystic kidney disease 2-like 2                                    |                                                                 | 1.05  | AAGTGAAGCTGACTATTCAA   | NM_014386:    | NM_014386:                     |
| 27039  | PKD2L2 (poly polycystic kidney disease 2-like 2                                    |                                                                 | 0.40  | TCCGTTGTTTAAAGACATA    | NM_014386:    | NM_014386:                     |
| 10343  | PKDREJ (polypolycystic kidney disease (polycystin) and REJ (sperm receptor for egg |                                                                 | 0.92  | GAGGTTGTATCAATTTGCAA   | NM_006071:    | NM_006071:                     |
| 10343  | PKDREJ (polypolycystic kidney disease (polycystin) and REJ (sperm receptor for egg |                                                                 | 1.75  | CGGGCCAAATACAATTTCAA   | NM_006071:    | NM_006071:                     |
| 5314   | PKHD1                                                                              | polycystic kidney and hepatic disease 1 (autosomal recessive)   | -5.23 | CACCGGCATATTGGAAGTGA   | NM_170724:    | NM_138694;NM_170724:           |
| 5314   | PKHD1                                                                              | polycystic kidney and hepatic disease 1 (autosomal recessive)   | -1.92 | CACGAGATAGCTGACTTTCAA  | NM_170724:    | NM_138694;NM_170724:           |
| 5569   | PKIA                                                                               | protein kinase (cAMP-dependent, catalytic) inhibitor alpha      | -0.27 | ATGATTATCATTAAGAAGCTAA | NM_181839:    | NM_006823;NM_181839:           |
| 5569   | PKIA                                                                               | protein kinase (cAMP-dependent, catalytic) inhibitor alpha      | 1.21  | TCACCTGATCATATGACGAAA  | NM_181839:    | NM_006823;NM_181839:           |
| 5570   | PKIB                                                                               | protein kinase (cAMP-dependent, catalytic) inhibitor beta       | -0.17 | CAGCATGTGTATATTAGATAA  | NM_181795:    | NM_181795;NM_181794;NM_032471: |
| 5570   | PKIB                                                                               | protein kinase (cAMP-dependent, catalytic) inhibitor beta       | -4.90 | CCGGAATGCTTACCAGACAT   | NM_181795:    | NM_181795;NM_181794;NM_032471: |
| 11142  | PKIG                                                                               | protein kinase (cAMP-dependent, catalytic) inhibitor gamma      | 0.70  | CCACAAGATGTTATTTATTA   | NM_181805:    | NM_181804;NM_007066;NM_181805: |
| 11142  | PKIG                                                                               | protein kinase (cAMP-dependent, catalytic) inhibitor gamma      | -0.17 | GAGCTCCATGCCAGATATAA   | NM_181805:    | NM_181804;NM_007066;NM_181805: |
| 5313   | PKLR                                                                               | pyruvate kinase, liver and RBC                                  | -0.87 | CGGGTGAATTTGGCAATTGAA  | NM_000298:    | NM_000298;NM_181871:           |
| 5313   | PKLR                                                                               | pyruvate kinase, liver and RBC                                  | -0.96 | GAGGCTTACTTGAGACTATAA  | NM_000298:    | NM_000298;NM_181871:           |
| 5315   | PKM2                                                                               | pyruvate kinase, muscle                                         | -1.84 | AACATCAAGATTATCAGCAAA  | NM_182471:    | NM_182470;NM_182471;NM_002654: |
| 5315   | PKM2                                                                               | pyruvate kinase, muscle                                         | -0.11 | CCGATCAGTGGAGCGTTGA    | NM_182471:    | NM_182470;NM_182471;NM_002654: |
| 9088   | PKMYT1                                                                             | protein kinase, membrane associated tyrosine/threonine 1        | -3.62 | CCGGCCAGAGTCTCTTCCCA   | NM_004203:    | NM_182687;NM_004203:           |
| 9088   | PKMYT1                                                                             | protein kinase, membrane associated tyrosine/threonine 1        | -1.96 | CTGGGAGGAAGTCCCGTCTA   | NM_004203:    | NM_182687;NM_004203:           |
| 5585   | PKN1                                                                               | protein kinase N1                                               | 0.10  | CAGGACAGTAAGACCAAGTT   | NM_002741:    | NM_213560;NM_002741:           |
| 5585   | PKN1                                                                               | protein kinase N1                                               | -9.25 | CCGCAAGGAGCTGAAGCTGAA  | NM_002741:    | NM_213560;NM_002741:           |
| 5586   | PKN2                                                                               | protein kinase N2                                               | 0.45  | AAAGTATGATATCTACGCAAA  | NM_006256:    | NM_006256:                     |
| 5586   | PKN2                                                                               | protein kinase N2                                               | -1.19 | CACGTCAAAGTATGATATCTA  | NM_006256:    | NM_006256:                     |
| 29941  | PKN3                                                                               | protein kinase N3                                               | 0.53  | AGGGAAATACTACGCCATCAA  | NM_013355:    | NM_013355:                     |
| 29941  | PKN3                                                                               | protein kinase N3                                               | 0.92  | CCGGGAAGTTCAAGTTTGA    | NM_013355:    | NM_013355:                     |
| 5317   | PKP1                                                                               | plakophilin 1 (ectodermal dysplasia/skin fragility syndrome)    | -0.22 | CTGGTGTAGAGAGGAATTA    | NM_000299:    | NM_000299;NM_001005337:        |
| 5317   | PKP1                                                                               | plakophilin 1 (ectodermal dysplasia/skin fragility syndrome)    | -1.15 | TCCGAGGGCCCTTATGAGAAA  | NM_000299:    | NM_000299;NM_001005337:        |
| 51365  | PLA1A                                                                              | phospholipase A1 member A                                       | 1.27  | GCAGCTTATTGAGACATTA    | NM_015900:    | NM_015900:                     |
| 51365  | PLA1A                                                                              | phospholipase A1 member A                                       | 0.12  | AAGATGGTCTGCTTACCTGAA  | NM_015900:    | NM_015900:                     |
| 8399   | PLA2G10                                                                            | phospholipase A2, group X                                       | 0.22  | AAGCGTCTCTCAGTAAGTAA   | NM_003561:    | NM_003561:                     |
| 8399   | PLA2G10                                                                            | phospholipase A2, group X                                       | 0.58  | CCCAACTGAGTACAACCTTA   | NM_003561:    | NM_003561:                     |

|        |                                                                 |                                                                         |        |                        |               |                                                                                      |
|--------|-----------------------------------------------------------------|-------------------------------------------------------------------------|--------|------------------------|---------------|--------------------------------------------------------------------------------------|
| 81579  | PLA2G12A                                                        | phospholipase A2, group XIIA                                            | -0.63  | AACCTAATATATCAAGGCAAA  | NM_030821:    | NM_030821:                                                                           |
| 81579  | PLA2G12A                                                        | phospholipase A2, group XIIA                                            | 0.09   | AAAGATATTTAACTAATATA   | NM_030821:    | NM_030821:                                                                           |
| 5319   | PLA2G1B                                                         | phospholipase A2, group IB (pancreas)                                   | 1.09   | TCCATATAACAAGGCACACAA  | NM_000928:    | NM_000928:                                                                           |
| 5319   | PLA2G1B                                                         | phospholipase A2, group IB (pancreas)                                   | 0.29   | CACACTGTACTCCGAATAAA   | NM_000928:    | NM_000928:                                                                           |
| 5320   | PLA2G2A                                                         | phospholipase A2, group IIA (platelets, synovial fluid)                 | -0.22  | CACCAAAATTTCTGAGCTACAA | NM_000300:    | NM_000300:                                                                           |
| 5320   | PLA2G2A                                                         | phospholipase A2, group IIA (platelets, synovial fluid)                 | 0.05   | AAACGTGGATGTGGCACCAAA  | NM_000300:    | NM_000300:                                                                           |
| 26279  | PLA2G2D                                                         | phospholipase A2, group IID                                             | 0.92   | CAGGGTAGGGAATCTCCATA   | NM_012400:    | NM_012400:                                                                           |
| 26279  | PLA2G2D                                                         | phospholipase A2, group IID                                             | 0.36   | CAGAAAGTACTCCCTCAGTAA  | NM_012400:    | NM_012400:                                                                           |
| 30814  | PLA2G2E (phospholipase A2, group IIE                            |                                                                         | -3.35  | AACCGCAAATATGCCCATAT   | NM_014589:    | NM_014589:                                                                           |
| 30814  | PLA2G2E (phospholipase A2, group IIE                            |                                                                         | 0.15   | CAAGTCCGCCCTCGAGTACAA  | NM_014589:    | NM_014589:                                                                           |
| 64600  | PLA2G2F                                                         | phospholipase A2, group IIF                                             | -3.00  | CACGCCAACTGCAGCATCTA   | NM_022819:    | NM_022819:                                                                           |
| 64600  | PLA2G2F                                                         | phospholipase A2, group IIF                                             | 1.39   | ATCGAGAACACACTGAGATA   | NM_022819:    | NM_022819:                                                                           |
| 50487  | PLA2G3                                                          | phospholipase A2, group III                                             | 0.86   | AGCCCTAAACCTAAATTCAAA  | NM_015715:    | NM_015715:                                                                           |
| 50487  | PLA2G3                                                          | phospholipase A2, group III                                             | -0.07  | CCAGCCCTAAACCTAAATTC   | NM_015715:    | NM_015715:                                                                           |
| 5322   | PLA2G5                                                          | phospholipase A2, group V                                               | -0.02  | AAGAGCCAAATGACTCTCTA   | NM_000929:    | NM_000929:                                                                           |
| 5322   | PLA2G5                                                          | phospholipase A2, group V                                               | 0.32   | CTGGTGTATGGGTATTAATA   | NM_000929:    | NM_000929:                                                                           |
| 7941   | PLA2G7                                                          | phospholipase A2, group VII (platelet-activating factor acetylhydrolase | -0.43  | AAGACTCTATTGATAGGGAA   | NM_005084:    | NM_005084:                                                                           |
| 7941   | PLA2G7                                                          | phospholipase A2, group VII (platelet-activating factor acetylhydrolase | 0.08   | TCAGGACACTTTATCTGCTA   | NM_005084:    | NM_005084:                                                                           |
| 22925  | PLA2R1                                                          | phospholipase A2 receptor 1, 180kDa                                     | -2.83  | AAGGAGGTACCGTGTAAAGTA  | NM_001007267: | NM_001007267:                                                                        |
| 22925  | PLA2R1                                                          | phospholipase A2 receptor 1, 180kDa                                     | -3.24  | AAGGTTGGCTCATAGAGAAA   | NM_001007267: | NM_001007267:                                                                        |
| 5327   | PLAT                                                            | plasminogen activator, tissue                                           | -0.61  | CAGCATATTTATAGCAATCCA  | NM_000930:    | NM_000930.NM_033011.NM_000931:                                                       |
| 5327   | PLAT                                                            | plasminogen activator, tissue                                           | -0.86  | CAGGAAAGACGGATTGCAATTA | NM_000930:    | NM_000930.NM_033011.NM_000931:                                                       |
| 5328   | PLAU                                                            | plasminogen activator, urokinase                                        | -2.41  | CGCATGACTCTGACTGGAAAT  | NM_002658:    | NM_002658:                                                                           |
| 5328   | PLAU                                                            | plasminogen activator, urokinase                                        | 2.64   | GAGCTGGTCTGATTGTGTTAA  | NM_002658:    | NM_002658:                                                                           |
| 5329   | PLAUR                                                           | plasminogen activator, urokinase receptor                               | -0.29  | ACCGAGGTTGTGTGGGGTTA   | NM_002659:    | NM_001005376.NM_002659.NM_001005377:                                                 |
| 5329   | PLAUR                                                           | plasminogen activator, urokinase receptor                               | -0.39  | ACCGGCACTCACGAACCGAAA  | NM_002659:    | NM_002659.NM_001005377:                                                              |
| 23236  | PLCB1                                                           | phospholipase C, beta 1 (phosphoinositide-specific)                     | 0.48   | TCGAGATTACATGGATGTTAA  | NM_015192:    | NM_182734.NM_015192:                                                                 |
| 23236  | PLCB1                                                           | phospholipase C, beta 1 (phosphoinositide-specific)                     | 0.02   | CAGAGATGATCCGGTCATATA  | NM_015192:    | NM_182734.NM_015192:                                                                 |
| 5330   | PLCB2                                                           | phospholipase C, beta 2                                                 | 0.13   | GGGGTGGCTGGGAACAGATA   | NM_004573:    | NM_004573:                                                                           |
| 5330   | PLCB2                                                           | phospholipase C, beta 2                                                 | -0.77  | CTCCATCACTCTGCTGGAA    | NM_004573:    | NM_004573:                                                                           |
| 5331   | PLCB3 (phospholipase C, beta 3 (phosphatidylinositol-specific)  |                                                                         | 0.87   | ACGCTTGTCAACTACATCGAA  | NM_000932:    | NM_000932:                                                                           |
| 5331   | PLCB3 (phospholipase C, beta 3 (phosphatidylinositol-specific)  |                                                                         | -1.07  | CACGCTTGTCAACTACATCGA  | NM_000932:    | NM_000932:                                                                           |
| 5332   | PLCB4                                                           | phospholipase C, beta 4                                                 | -3.85  | AACCCGGTAGTCTAGAACATA  | NM_000933:    | NM_000933.NM_182797:                                                                 |
| 5332   | PLCB4                                                           | phospholipase C, beta 4                                                 | 0.27   | CTGCGATTCCGGGATATTATA  | NM_000933:    | NM_000933.NM_182797:                                                                 |
| 5333   | PLCD1 (phospholipase C, delta 1                                 |                                                                         | 0.99   | TCGGTTAGGAATAACAAATGCA | NM_006225:    | NM_006225:                                                                           |
| 5333   | PLCD1 (phospholipase C, delta 1                                 |                                                                         | 0.06   | CCGCTTCTGGTGGAAAGATTA  | NM_006225:    | NM_006225:                                                                           |
| 113026 | PLCD3 (phospholipase C, delta 3                                 |                                                                         | 2.06   | TAGGTTTGAACCTGTTTATA   | NM_133373:    | NM_133373:                                                                           |
| 113026 | PLCD3 (phospholipase C, delta 3                                 |                                                                         | 0.38   | AAGCAAGGGTACCGCCACATA  | NM_133373:    | NM_133373:                                                                           |
| 84812  | PLCD4                                                           | phospholipase C, delta 4                                                | -3.57  | CTCATTCTCCTAACAAAGAA   | NM_032726:    | NM_032726:                                                                           |
| 84812  | PLCD4                                                           | phospholipase C, delta 4                                                | 0.97   | CAGATCTTGGCGTCTGCTCA   | NM_032726:    | NM_032726:                                                                           |
| 51196  | PLCE1                                                           | phospholipase C, epsilon 1                                              | -1.18  | AACCCAGGTGGAGATCTTTAA  | NM_016341:    | NM_016341:                                                                           |
| 51196  | PLCE1                                                           | phospholipase C, epsilon 1                                              | -1.32  | CGCGGTACAATTCOCAAGAA   | NM_016341:    | NM_016341:                                                                           |
| 5335   | PLCG1                                                           | phospholipase C, gamma 1                                                | 1.26   | CACCCCTTACCACCAAGATCAA | NM_002660:    | NM_002660.NM_182811:                                                                 |
| 5335   | PLCG1                                                           | phospholipase C, gamma 1                                                | -0.53  | CGGGACTTTGATCGCTATCAA  | NM_002660:    | NM_002660.NM_182811:                                                                 |
| 5336   | PLCG2 (phospholipase C, gamma 2 (phosphatidylinositol-specific) |                                                                         | 0.94   | CACGTGGAAGATTGACAGCAA  | NM_002661:    | NM_002661:                                                                           |
| 5336   | PLCG2 (phospholipase C, gamma 2 (phosphatidylinositol-specific) |                                                                         | 0.89   | GACGACGGTTGTGAATGATA   | NM_002661:    | NM_002661:                                                                           |
| 5334   | PLCL1                                                           | phospholipase C-like 1                                                  | 1.27   | CTCAGGAATATCGGCTTTAA   | NM_006226:    | NM_006226:                                                                           |
| 5334   | PLCL1                                                           | phospholipase C-like 1                                                  | -1.66  | AAGGATGTCGGTAGATTACAA  | NM_006226:    | NM_006226:                                                                           |
| 23228  | PLCL2                                                           | phospholipase C-like 2                                                  | -0.02  | CAGGATATATCGAGCTCTTA   | NM_015184:    | NM_015184:                                                                           |
| 23228  | PLCL2                                                           | phospholipase C-like 2                                                  | -0.44  | CAGTGTCAATGATATTTATA   | NM_015184:    | NM_015184:                                                                           |
| 23007  | PLCL3                                                           | phospholipase C-like 3                                                  | 1.37   | CACGGTCTAAATCTTACAGTA  | NM_042635:    | NM_042635:                                                                           |
| 23007  | PLCL3                                                           | phospholipase C-like 3                                                  | -3.71  | CCGAGCCAAATTCAGGCAAA   | NM_042635:    | NM_042635:                                                                           |
| 9651   | PLCL4                                                           | phospholipase C-like 4                                                  | 0.67   | ACCAATCGAAAGCGGTAGAA   | NM_371214:    | NM_371214:                                                                           |
| 9651   | PLCL4                                                           | phospholipase C-like 4                                                  | -5.71  | CCGGGAGAGAAAGACCATGAA  | NM_371214:    | NM_371214:                                                                           |
| 89869  | PLCZ1                                                           | phospholipase C, zeta 1                                                 | 0.42   | TTAGCTATGCATCGCAATAAA  | NM_033123:    | NM_033123:                                                                           |
| 89869  | PLCZ1                                                           | phospholipase C, zeta 1                                                 | 1.04   | CAGCAGACTCGTGTATTTAAA  | NM_033123:    | NM_033123:                                                                           |
| 5338   | PLD2 (phospholipase D2                                          |                                                                         | 0.38   | CGGGACCTCTCGAGACACAAA  | NM_002663:    | NM_002663:                                                                           |
| 5338   | PLD2 (phospholipase D2                                          |                                                                         | -1.67  | CAGCCTGTGACAGACACTAA   | NM_002663:    | NM_002663:                                                                           |
| 5339   | PLEC1                                                           | plectin 1, intermediate filament binding protein 500kDa                 | -0.68  | CACAGTGGAGAAGATCATCAA  | NM_000445:    | NM_201384.NM_201382.NM_201383.NM_201380:<br>NM_201379.NM_201381.NM_201378.NM_000445: |
| 5339   | PLEC1                                                           | plectin 1, intermediate filament binding protein 500kDa                 | 0.82   | CCAGACTAATATATTAATATA  | NM_000445:    | NM_201384.NM_201382.NM_201383.NM_201380:<br>NM_201379.NM_201381.NM_201378.NM_000445: |
| 5341   | PLEK                                                            | pleckstrin                                                              | -0.25  | ACCATTGACTTAGTGCCCTTA  | NM_002664:    | NM_002664:                                                                           |
| 5341   | PLEK                                                            | pleckstrin                                                              | 0.76   | GAGCATTTCTCTAACGTTTTT  | NM_002664:    | NM_002664:                                                                           |
| 23207  | PLEKHM2                                                         | pleckstrin homology domain containing, family M (with RUN domain) r     | 0.21   | CTGGAGTCTCAGAGTAGACAA  | NM_290944:    | NM_290944:                                                                           |
| 23207  | PLEKHM2                                                         | pleckstrin homology domain containing, family M (with RUN domain) r     | 0.00   | CCGATTGCTGTCTGCAGCTGAA | NM_290944:    | NM_290944:                                                                           |
| 80301  | PLEKHQ1                                                         | pleckstrin homology domain containing, family Q member 1                | 1.38   | CAAGGCTTTCCGATGAGGTA   | NM_025201:    | NM_025201:                                                                           |
| 80301  | PLEKHQ1                                                         | pleckstrin homology domain containing, family Q member 1                | 0.03   | AAGCTTACTGTAAATGATCAT  | NM_025201:    | NM_025201:                                                                           |
| 5340   | PLG                                                             | plasminogen                                                             | 0.96   | CAGGAAAGAAGTGTCACTGCT  | NM_000301:    | NM_000301:                                                                           |
| 5340   | PLG                                                             | plasminogen                                                             | -6.23  | CACCACCACACAGGAAAGAA   | NM_000301:    | NM_000301:                                                                           |
| 5346   | PLIN                                                            | perilipin                                                               | 1.49   | TGGCTTTTATGAACATTTAA   | NM_002666:    | NM_002666:                                                                           |
| 5346   | PLIN                                                            | perilipin                                                               | 0.88   | GGGGTTTCTCTCAACAATAA   | NM_002666:    | NM_002666:                                                                           |
| 5347   | PLK1                                                            | polo-like kinase 1 (Drosophila)                                         | -13.17 | CACCATATGAATTTGACAGAA  | NM_005030:    | NM_005030:                                                                           |
| 5347   | PLK1                                                            | polo-like kinase 1 (Drosophila)                                         | -17.57 | CCGGATCAAGAAGAAATGAATA | NM_005030:    | NM_005030:                                                                           |
| 10769  | PLK2                                                            | polo-like kinase 2 (Drosophila)                                         | 0.16   | CAGATGCTCTGAGCAATTTA   | NM_006622:    | NM_006622:                                                                           |
| 10769  | PLK2                                                            | polo-like kinase 2 (Drosophila)                                         | 0.04   | CAGATTGTGCTGAGCTGAAA   | NM_006622:    | NM_006622:                                                                           |
| 1263   | PLK3                                                            | polo-like kinase 3 (Drosophila)                                         | 1.06   | CAGAAGAGCTGTGCATACAA   | NM_004073:    | NM_004073:                                                                           |
| 1263   | PLK3                                                            | polo-like kinase 3 (Drosophila)                                         | -0.03  | CCGAAATCGTGTGCTTTGTA   | NM_004073:    | NM_004073:                                                                           |
| 10733  | PLK4                                                            | polo-like kinase 4 (Drosophila)                                         | -1.41  | CACCAATGGTCAAAACACTA   | NM_014264:    | NM_014264:                                                                           |
| 10733  | PLK4                                                            | polo-like kinase 4 (Drosophila)                                         | -2.90  | CTGGTAGTACTAGTTTACCTA  | NM_014264:    | NM_014264:                                                                           |
| 5351   | PLOD1                                                           | procollagen-lysine 1, 2-oxoglutarate 5-dioxygenase 1                    | 1.96   | AACTGGAGAGTTTCTATTAAA  | NM_000302:    | NM_000302:                                                                           |
| 5351   | PLOD1                                                           | procollagen-lysine 1, 2-oxoglutarate 5-dioxygenase 1                    | 0.34   | CAGAGGCGGGAACACACCTTTA | NM_000302:    | NM_000302:                                                                           |
| 5354   | PLP1                                                            | proteolipid protein 1 (Pelizaeus-Merzbacher disease, spastic parapleg   | 1.62   | TAAGGAGATGTAAGAGCTTTA  | NM_000533:    | NM_199478.NM_000533:                                                                 |
| 5354   | PLP1                                                            | proteolipid protein 1 (Pelizaeus-Merzbacher disease, spastic parapleg   | -0.19  | AAGGATCTTTCCACCACAGAA  | NM_000533:    | NM_199478.NM_000533:                                                                 |
| 5359   | PLSCR1                                                          | phospholipid scramblase 1                                               | 0.43   | ACGTAAGATTACAGAAACGAA  | NM_021105:    | NM_021105:                                                                           |
| 5359   | PLSCR1                                                          | phospholipid scramblase 1                                               | 0.77   | CACAAGATATTAATACCAA    | NM_021105:    | NM_021105:                                                                           |
| 5360   | PLTP (phospholipid transfer protein                             |                                                                         | -1.49  | AAGACGGGATTTGAAGCTGTA  | NM_006227:    | NM_006227.NM_182676:                                                                 |
| 5360   | PLTP (phospholipid transfer protein                             |                                                                         | 0.44   | CAGGTCGGAATCTATTCCAA   | NM_006227:    | NM_006227.NM_182676:                                                                 |
| 57125  | PLXDC1                                                          | plexin domain containing 1                                              | -1.04  | AGGCAGGACTTCGCTGATAAA  | NM_020405:    | NM_020405:                                                                           |
| 57125  | PLXDC1                                                          | plexin domain containing 1                                              | 0.82   | CAGCTAAATTTGATAATTTAA  | NM_020405:    | NM_020405:                                                                           |
| 84898  | PLXDC2                                                          | plexin domain containing 2                                              | -0.08  | ACAGACCACAATTAATATATA  | NM_032812:    | NM_032812:                                                                           |
| 84898  | PLXDC2                                                          | plexin domain containing 2                                              | 0.54   | CACAGTACATAGCACCTTTAA  | NM_032812:    | NM_032812:                                                                           |
| 5361   | PLXNA1                                                          | plexin A1                                                               | 0.24   | AAAGACGATTTGAAACAAGAAA | NM_032242:    | NM_032242:                                                                           |
| 5361   | PLXNA1                                                          | plexin A1                                                               | 1.81   | CACAGCTAGAATGATATATT   | NM_032242:    | NM_032242:                                                                           |
| 5362   | PLXNA2                                                          | plexin A2                                                               | -0.24  | CCGGACGCTCCATCAGCAGATA | NM_025179:    | NM_025179:                                                                           |
| 5362   | PLXNA2                                                          | plexin A2                                                               | 1.59   | CCGGATCAATATTTCCAGAGGA | NM_025179:    | NM_025179:                                                                           |
| 55558  | PLXNA3                                                          | plexin A3                                                               | 0.49   | CTGCCTATTTTGAATCGAA    | NM_017514:    | NM_017514:                                                                           |



|        |                                                                                            |                                                             |        |                        |            |                                                                                                                        |
|--------|--------------------------------------------------------------------------------------------|-------------------------------------------------------------|--------|------------------------|------------|------------------------------------------------------------------------------------------------------------------------|
| 55558  | PLXNA3                                                                                     | plexin A3                                                   | -0.23  | CGCGGAGACTCAGAGTTCTA   | NM_017514: | NM_017514:                                                                                                             |
| 91584  | PLXNA4B                                                                                    | plexin A4, B                                                | -7.45  | CAGCCGGAACTGACCAAGAA   | NM_181775: | NM_181775:                                                                                                             |
| 91584  | PLXNA4B                                                                                    | plexin A4, B                                                | -0.34  | TACCTGGAAATTCCTCTAAA   | NM_181775: | NM_181775:                                                                                                             |
| 5364   | PLXNB1                                                                                     | plexin B1                                                   | -0.04  | AACGGGGACAGTTCAAGTATA  | NM_002673: | NM_002673:                                                                                                             |
| 5364   | PLXNB1                                                                                     | plexin B1                                                   | -0.14  | CCGGTGGAAATTTATCCTTGA  | NM_002673: | NM_002673:                                                                                                             |
| 23654  | PLXNB2                                                                                     | plexin B2                                                   | 0.03   | ACGAGAGTATGAGAAGATCAA  | XM_371474: | XM_371474:                                                                                                             |
| 23654  | PLXNB2                                                                                     | plexin B2                                                   | -0.94  | CGCGAGCGAAGAGAGCTGAA   | XM_371474: | XM_371474:                                                                                                             |
| 5365   | PLXNB3                                                                                     | plexin B3                                                   | 0.00   | CACAGGTACTATGATCAGATT  | NM_005393: | NM_005393:                                                                                                             |
| 5365   | PLXNB3                                                                                     | plexin B3                                                   | -0.67  | CAGCGGGTCTTTCACCCCTA   | NM_005393: | NM_005393:                                                                                                             |
| 10154  | PLXNC1                                                                                     | plexin C1                                                   | 1.09   | GACGTCGTACATATTTGGAAA  | NM_005761: | NM_005761:                                                                                                             |
| 10154  | PLXNC1                                                                                     | plexin C1                                                   | -0.04  | TCGAGGAAGCAAGTTCAA     | NM_005761: | NM_005761:                                                                                                             |
| 23129  | PLXND1                                                                                     | plexin D1                                                   | -10.97 | CACGCTCGCAAGTTCTCAA    | NM_015103: | NM_015103:                                                                                                             |
| 23129  | PLXND1                                                                                     | plexin D1                                                   | -4.70  | CACGAGTACCGGGTCAAGATA  | NM_015103: | NM_015103:                                                                                                             |
| 5366   | PMAIP1                                                                                     | phorbol-12-myristate-13-acetate-induced protein 1           | -1.44  | TGGGCTATATACAGTCCTCAA  | NM_021127: | NM_021127:                                                                                                             |
| 5366   | PMAIP1                                                                                     | phorbol-12-myristate-13-acetate-induced protein 1           | 0.47   | TTGGTCACTACACAACGTAA   | NM_021127: | NM_021127:                                                                                                             |
| 5367   | PMCH                                                                                       | pro-melanin-concentrating hormone                           | -0.28  | ATCTCTCTTCCATATATTA    | NM_002674: | NM_002674:                                                                                                             |
| 5367   | PMCH                                                                                       | pro-melanin-concentrating hormone                           | 0.22   | TAGTGTAAATGTATCAGTAA   | NM_002674: | NM_002674:                                                                                                             |
|        |                                                                                            |                                                             |        |                        |            | NM_033250:NM_002675:NM_033249:NM_033244:<br>NM_033242:NM_033238:NM_033247:NM_033239:<br>NM_033246:NM_033240:NM_033245: |
| 5371   | PML                                                                                        | promyelocytic leukemia                                      | -1.60  | CAGGAGCAGGATAGTGCCCTT  | NM_002675: | NM_002675:                                                                                                             |
| 5371   | PML                                                                                        | promyelocytic leukemia                                      | -0.24  | CAGGGTTGTCGGCTCTGATTA  | NM_002675: | NM_002675:                                                                                                             |
| 5373   | PNM2                                                                                       | phosphomannomutase 2                                        | 0.89   | CACGTTCTTCTGAAACTGGG   | NM_000303: | NM_000303:                                                                                                             |
| 5373   | PNM2                                                                                       | phosphomannomutase 2                                        | 0.76   | CGGGATGTGACAGCTTACC    | NM_000303: | NM_000303:                                                                                                             |
| 23203  | PNMCA                                                                                      | peptidase (mitochondrial processing) alpha                  | -0.59  | TCGAGAAATGGTAGAAATCAT  | NM_015160: | NM_015160:                                                                                                             |
| 23203  | PNMCA                                                                                      | peptidase (mitochondrial processing) alpha                  | -0.81  | CTCACCAGAGTATTCATGAA   | NM_015160: | NM_015160:                                                                                                             |
| 9512   | PNPCB                                                                                      | peptidase (mitochondrial processing) beta                   | 0.82   | TACATTTATAATAGGAGTCCA  | NM_004279: | NM_004279:                                                                                                             |
| 9512   | PNPCB                                                                                      | peptidase (mitochondrial processing) beta                   | -0.09  | AAGAAATGGATGCGACTCTGTA | NM_004279: | NM_004279:                                                                                                             |
| 5378   | PMS1                                                                                       | PMS1 postmeiotic segregation increased 1 (S. cerevisiae)    | 0.99   | CAGCGAAATGGTTTCAAGATA  | NM_000534: | NM_000534:                                                                                                             |
| 5378   | PMS1                                                                                       | PMS1 postmeiotic segregation increased 1 (S. cerevisiae)    | 0.14   | TTGGAACGATACATAAGTCAA  | NM_000534: | NM_000534:                                                                                                             |
| 5395   | PMS2                                                                                       | PMS2 postmeiotic segregation increased 2 (S. cerevisiae)    | 0.06   | CAGACTCGTGAATGAGGCTCTA | NM_000535: | NM_000535:                                                                                                             |
| 5395   | PMS2                                                                                       | PMS2 postmeiotic segregation increased 2 (S. cerevisiae)    | -0.06  | CCGGATGTAATTTCCAGTGT   | NM_000535: | NM_000535:                                                                                                             |
| 10654  | PMVK                                                                                       | phosphomevalonate kinase                                    | 0.72   | CCCGATGTGGATCAATAATA   | NM_006556: | NM_006556:                                                                                                             |
| 10654  | PMVK                                                                                       | phosphomevalonate kinase                                    | -0.18  | TTGGCTGTGCTTGAAGCGGAA  | NM_006556: | NM_006556:                                                                                                             |
| 139728 | PNCK                                                                                       | pregnancy upregulated non-ubiquitously expressed CaM kinase | -3.33  | CTCGAAGATCATGGTCTCTGA  | NM_198452: | NM_198452:                                                                                                             |
| 139728 | PNCK                                                                                       | pregnancy upregulated non-ubiquitously expressed CaM kinase | 0.18   | TCGGTGTGTACAGCCCGAAA   | NM_198452: | NM_198452:                                                                                                             |
| 11284  | PNKP                                                                                       | polynucleotide kinase 3'-phosphatase                        | -0.70  | CACGTGAACGAGGACACGCTA  | NM_007254: | NM_007254:                                                                                                             |
| 11284  | PNKP                                                                                       | polynucleotide kinase 3'-phosphatase                        | 1.63   | CACGTGTGAGACACGCCCTGAA | NM_007254: | NM_007254:                                                                                                             |
| 5406   | PNLIP                                                                                      | pancreatic lipase                                           | -0.77  | AATGAATGACTTCTAATAAA   | NM_000936: | NM_000936:                                                                                                             |
| 5406   | PNLIP                                                                                      | pancreatic lipase                                           | 0.03   | TAGGAGACTACTGTTATTTGA  | NM_000936: | NM_000936:                                                                                                             |
| 5407   | PNLIPRP1                                                                                   | pancreatic lipase-related protein 1                         | -5.62  | CCCGATGGGTTTGGTCATAT   | NM_006229: | NM_006229:                                                                                                             |
| 5407   | PNLIPRP1                                                                                   | pancreatic lipase-related protein 1                         | 0.00   | CAAGTATTACTTGGAAAGCAT  | NM_006229: | NM_006229:                                                                                                             |
| 5408   | PNLIPRP2                                                                                   | pancreatic lipase-related protein 2                         | 1.18   | TGGGCTATTGGCGTAATAAA   | NM_005396: | NM_005396:                                                                                                             |
| 5408   | PNLIPRP2                                                                                   | pancreatic lipase-related protein 2                         | -0.11  | CTGGAACAAACGTTGGGATAAA | NM_005396: | NM_005396:                                                                                                             |
| 119548 | PNLIPRP3 (p. pancreatic lipase-related protein 3)                                          |                                                             | 1.14   | TAACAATATTATAATTTAA    | XM_058404: | NM_001011709:                                                                                                          |
| 119548 | PNLIPRP3 (p. pancreatic lipase-related protein 3)                                          |                                                             | 1.55   | AACAATATTATAATTTAA     | XM_058404: | NM_001011709:                                                                                                          |
| 5409   | PNMT                                                                                       | phenylethanolamine N-methyltransferase                      | -2.80  | AAGCCAACATGCCCTGCCTCAT | NM_002686: | NM_002686:                                                                                                             |
| 5409   | PNMT                                                                                       | phenylethanolamine N-methyltransferase                      | 0.29   | AAGGACATCACCATGACAGAT  | NM_002686: | NM_002686:                                                                                                             |
| 10957  | PNRC1                                                                                      | proline-rich nuclear receptor coactivator 1                 | -0.10  | CAGATTTCAAGTATGTGTGTA  | NM_006813: | NM_006813:                                                                                                             |
| 10957  | PNRC1                                                                                      | proline-rich nuclear receptor coactivator 1                 | 1.25   | TACACTGTATGAGCAACCAA   | NM_006813: | NM_006813:                                                                                                             |
| 55629  | PNRC2                                                                                      | proline-rich nuclear receptor coactivator 1                 | 0.25   | CCCAATGGCCCTGTTTATTA   | NM_017761: | NM_017761:                                                                                                             |
| 55629  | PNRC2                                                                                      | proline-rich nuclear receptor coactivator 2                 | 0.24   | ACAAGTTTATGTAGTACTTAA  | NM_017761: | NM_017761:                                                                                                             |
| 23509  | POFUT1                                                                                     | protein O-fucosyltransferase 1                              | 1.20   | TAGAAAGTAGAAGATGTAATA  | NM_015352: | NM_015352:                                                                                                             |
| 23509  | POFUT1                                                                                     | protein O-fucosyltransferase 1                              | -0.39  | ACAATGTGGCTGTTGATTA    | NM_015352: | NM_015352:                                                                                                             |
| 5422   | POLA (polym polymerase (DNA directed), alpha)                                              |                                                             | 0.27   | CTGGAGAACTTACTACCCGAT  | NM_016937: | NM_016937:                                                                                                             |
| 5422   | POLA (polym polymerase (DNA directed), alpha)                                              |                                                             | -0.19  | CTGCATGAAGCTACACCTCA   | NM_016937: | NM_016937:                                                                                                             |
| 5423   | POLB (polym polymerase (DNA directed), beta)                                               |                                                             | 1.08   | CAAGATATTGACTAAATGAA   | NM_002690: | NM_002690:                                                                                                             |
| 5423   | POLB (polym polymerase (DNA directed), beta)                                               |                                                             | 0.67   | TACGAGTTTCCATCAATTT    | NM_002690: | NM_002690:                                                                                                             |
| 5424   | POLD1 (polym polymerase (DNA directed), delta 1, catalytic subunit 125kDa)                 |                                                             | -1.42  | CGGAGAGCATGTTGGGTA     | NM_002691: | NM_002691:                                                                                                             |
| 5424   | POLD1 (polym polymerase (DNA directed), delta 1, catalytic subunit 125kDa)                 |                                                             | 0.27   | CGGACACGAGGAGAAATTAATA | NM_002691: | NM_002691:                                                                                                             |
| 5426   | POLE (polym polymerase (DNA directed), epsilon)                                            |                                                             | -0.59  | CGGCATCATCCTGTGACAAA   | NM_006231: | NM_006231:                                                                                                             |
| 5426   | POLE (polym polymerase (DNA directed), epsilon)                                            |                                                             | -0.02  | CGCCCTTCCATTGACCTGAA   | NM_006231: | NM_006231:                                                                                                             |
| 5428   | POLG (polym polymerase (DNA directed), gamma)                                              |                                                             | 0.80   | CACGAGCAAACTTCCGGGCAA  | NM_002693: | NM_002693:                                                                                                             |
| 5428   | POLG (polym polymerase (DNA directed), gamma)                                              |                                                             | 0.47   | CAGATGCGGGTCCACCTTAA   | NM_002693: | NM_002693:                                                                                                             |
| 5429   | POLH (polym polymerase (DNA directed), eta)                                                |                                                             | -0.41  | ATCCATTTAGGTGCTGAGTTA  | NM_006502: | NM_006502:                                                                                                             |
| 5429   | POLH (polym polymerase (DNA directed), eta)                                                |                                                             | 0.74   | CTGGTTGTGAGCATTCTGTGA  | NM_006502: | NM_006502:                                                                                                             |
| 11201  | POLI (polym polymerase (DNA directed), iota)                                               |                                                             | 0.90   | ACCGGGAACATCAGGCTTTAA  | NM_007195: | NM_007195:                                                                                                             |
| 11201  | POLI (polym polymerase (DNA directed), iota)                                               |                                                             | 1.40   | GCGGTTTATTAAGCTTCTTA   | NM_007195: | NM_007195:                                                                                                             |
| 51426  | POLK (polym polymerase (DNA directed), kappa)                                              |                                                             | -1.93  | CGGGTGACGACGGGTAGAAA   | NM_016218: | NM_016218:                                                                                                             |
| 51426  | POLK (polym polymerase (DNA directed), kappa)                                              |                                                             | -0.96  | TAGGATGGGACTTAATGATA   | NM_016218: | NM_016218:                                                                                                             |
| 27343  | POLL (polym polymerase (DNA directed), lambda)                                             |                                                             | -1.26  | CAAGAGGAGAATGGTCAGCAA  | NM_013274: | NM_013274:                                                                                                             |
| 27343  | POLL (polym polymerase (DNA directed), lambda)                                             |                                                             | -3.38  | CACCGGCTGTCACACTTCAA   | NM_013274: | NM_013274:                                                                                                             |
| 27343  | POLM (polym polymerase (DNA directed), mu)                                                 |                                                             | -1.36  | CCGAAATGCCAGAAAGAGAA   | NM_013284: | NM_013284:                                                                                                             |
| 27343  | POLM (polym polymerase (DNA directed), mu)                                                 |                                                             | 0.39   | CGGGAAGGACTGCCAACCTTA  | NM_013284: | NM_013284:                                                                                                             |
| 353497 | POLN (polym polymerase (DNA directed), nu)                                                 |                                                             | -3.94  | CAGGAGGCACATCAACAATTT  | NM_181808: | NM_181808:                                                                                                             |
| 353497 | POLN (polym polymerase (DNA directed), nu)                                                 |                                                             | -0.63  | TTGGCATTCTTACACATTTA   | NM_181808: | NM_181808:                                                                                                             |
| 10721  | POLQ (polym polymerase (DNA directed), theta)                                              |                                                             | 0.86   | AACCAGAATGTTTATATGAAA  | NM_006596: | NM_006596:                                                                                                             |
| 10721  | POLQ (polym polymerase (DNA directed), theta)                                              |                                                             | 0.92   | ACGGCCCTCTTATAGATAAAA  | NM_006596: | NM_006596:                                                                                                             |
| 9533   | POLR1C (polym polymerase (RNA) I polypeptide C, 30kDa)                                     |                                                             | 0.15   | CCCGGTTCCGAGATCATTATA  | NM_004875: | NM_004875:                                                                                                             |
| 9533   | POLR1C (polym polymerase (RNA) I polypeptide C, 30kDa)                                     |                                                             | -0.07  | GTGCAGGAAATCCAAAGTAAA  | NM_004875: | NM_004875:                                                                                                             |
| 5432   | POLR2C (polym polymerase (RNA) II (DNA directed) polypeptide C, 33kDa)                     |                                                             | -1.41  | AAGTGGTCTATGATGATTA    | NM_002694: | NM_002694:                                                                                                             |
| 5432   | POLR2C (polym polymerase (RNA) II (DNA directed) polypeptide C, 33kDa)                     |                                                             | -3.17  | CAGAGTATGTCGTAACCCATA  | NM_002694: | NM_002694:                                                                                                             |
| 5443   | POMC (proopiomelanocortin (adrenocorticotropin/ beta-lipotropin/ alpha-melanotropin) gene) |                                                             | 0.84   | TGCTGTAGTTAGGAAATAAA   | NM_000939: | NM_000939:                                                                                                             |
| 5443   | POMC (proopiomelanocortin (adrenocorticotropin/ beta-lipotropin/ alpha-melanotropin) gene) |                                                             | -1.61  | CTGCTGTAGTTAGGAAATAA   | NM_000939: | NM_000939:                                                                                                             |
| 22932  | POMZP3 (POM121 homolog, rat) and ZP3 fusion                                                |                                                             | 0.32   | CCACGGGATCGTGGGACTTTA  | NM_012230: | NM_012230:                                                                                                             |
| 22932  | POMZP3 (POM121 homolog, rat) and ZP3 fusion                                                |                                                             | -0.28  | CAAGTCGACAGCCAAACGAAA  | NM_012230: | NM_012230:                                                                                                             |
| 5444   | PON1 (para: paraoxonase 1)                                                                 |                                                             | 0.77   | CAGAATGAATCCCAATATGA   | NM_000446: | NM_000446:                                                                                                             |
| 5444   | PON1 (para: paraoxonase 1)                                                                 |                                                             | 0.22   | ATGTCATTTGTCAGATATTA   | NM_000446: | NM_000446:                                                                                                             |
| 5445   | PON2 (para: paraoxonase 2)                                                                 |                                                             | -0.74  | ATGATGGCATGTGTAGTTAA   | NM_000305: | NM_000305:                                                                                                             |
| 5445   | PON2 (para: paraoxonase 2)                                                                 |                                                             | 0.25   | CATGAAGTGGGATAACTTAA   | NM_000305: | NM_000305:                                                                                                             |
| 5447   | POR (P450 (cytochrome) oxidoreductase)                                                     |                                                             | -2.50  | CGGCTGAAGAGCTACGAGAA   | NM_000941: | NM_000941:                                                                                                             |
| 5447   | POR (P450 (cytochrome) oxidoreductase)                                                     |                                                             | 0.70   | GAGGAACATCATCGTGTCTA   | NM_000941: | NM_000941:                                                                                                             |
| 10631  | POSTN (periostin, osteoblast specific factor)                                              |                                                             | 0.72   | CTGCTTATTGTTAACCCCTATA | NM_006475: | NM_006475:                                                                                                             |
| 10631  | POSTN (periostin, osteoblast specific factor)                                              |                                                             | 0.66   | ACCAAGATTCATCAACTCAA   | NM_006475: | NM_006475:                                                                                                             |
| 5449   | POU1F1 (POU domain, class 1, transcription factor 1 (Pit1, growth hormone factor 1))       |                                                             | 0.33   | AGCCAAATATTAACAGTAA    | NM_000306: | NM_000306:                                                                                                             |
| 5449   | POU1F1 (POU domain, class 1, transcription factor 1 (Pit1, growth hormone factor 1))       |                                                             | 0.97   | TAGGAGCTTTGTACAATGAAA  | NM_000306: | NM_000306:                                                                                                             |
| 5451   | POU2F1 (POU domain, class 2, transcription factor 1)                                       |                                                             | 0.37   | TTGAGAACTTTCAACCAA     | NM_002697: | NM_002697:                                                                                                             |
| 5451   | POU2F1 (POU domain, class 2, transcription factor 1)                                       |                                                             | -5.38  | CAGCAGAATCTCAACCTGCAA  | NM_002697: | NM_002697:                                                                                                             |
| 5456   | POU3F4 (POU domain, class 3, transcription factor 4)                                       |                                                             | 0.53   | TCTAGTATTTCTAATATTTTA  | NM_000307: | NM_000307:                                                                                                             |
| 5456   | POU3F4 (POU domain, class 3, transcription factor 4)                                       |                                                             | 0.58   | TCGCCAAACAATTCACAAACA  | NM_000307: | NM_000307:                                                                                                             |

|        |              |                                                                        |       |                        |            |                                                         |
|--------|--------------|------------------------------------------------------------------------|-------|------------------------|------------|---------------------------------------------------------|
| 56342  | PPAN         | peter pan homolog (Drosophila)                                         | 0.00  | TTCCGCCACTATAGCATCAAA  | NM_020230: | NM_020230:                                              |
| 56342  | PPAN         | peter pan homolog (Drosophila)                                         | 1.18  | CCCTCGGTTTCCTTTTCATAAA | NM_020230: | NM_020230:                                              |
| 8611   | PPAP2A       | phosphatidic acid phosphatase type 2A                                  | 0.04  | AACCTGTCTGTCTTACTGTAA  | NM_176895: | NM_176895:NM_003711:                                    |
| 8611   | PPAP2A       | phosphatidic acid phosphatase type 2A                                  | 0.31  | CTGACATTGCCAAGATTGCAA  | NM_176895: | NM_176895:NM_003711:                                    |
| 8613   | PPAP2B       | phosphatidic acid phosphatase type 2B                                  | -0.13 | AGCGATCGTCCGGAGAGCAA   | AF480883:  | NM_003713:NM_177414:                                    |
| 8613   | PPAP2B       | phosphatidic acid phosphatase type 2B                                  | 0.01  | CAGCACATTTTCAGAAGAAAT  | AF480883:  | NM_003713:NM_177414:                                    |
| 8612   | PPAP2C       | phosphatidic acid phosphatase type 2C                                  | 0.81  | CGGGTCAACTGCTCGGTCTA   | NM_177543: | NM_177543:NM_177526:NM_003712:                          |
| 8612   | PPAP2C       | phosphatidic acid phosphatase type 2C                                  | -2.15 | TGCGTGGACTTCAACAACCTA  | NM_177543: | NM_177543:NM_177526:NM_003712:                          |
| 5465   | PPARA        | peroxisome proliferative activated receptor, alpha                     | 0.27  | AGGAAGGGTTGTGGCAAAATA  | NM_005036: | NM_001001930:NM_005036:NM_001001929:NM_01001928:        |
| 5465   | PPARA        | peroxisome proliferative activated receptor, alpha                     | 2.39  | CGTGAGAAAGTCAACAACCTA  | NM_005036: | NM_001001928:                                           |
| 5469   | PPARBP       | PPAR binding protein                                                   | -3.20 | AAGTTTAAGGGCAATAACCAA  | NM_004774: | NM_004774:                                              |
| 5469   | PPARBP       | PPAR binding protein                                                   | -0.89 | CAGTGTTCCTGCTAAATCTA   | NM_004774: | NM_004774:                                              |
| 5467   | PPARD        | peroxisome proliferative activated receptor, delta                     | 0.80  | ACTGACGAAACCTTAAATAAA  | NM_006238: | NM_006238:                                              |
| 5467   | PPARD        | peroxisome proliferative activated receptor, delta                     | 0.77  | CACGACTGACGAAACCTTAA   | NM_006238: | NM_006238:                                              |
| 5468   | PPARG        | peroxisome proliferative activated receptor, gamma                     | -1.10 | CAGCGACTTGGCAATATTTAT  | NM_005037: | NM_005037:NM_015869:NM_138711:NM_138712:                |
| 5468   | PPARG        | peroxisome proliferative activated receptor, gamma                     | -0.47 | CGGAGAACAACTCAGATTGAA  | NM_005037: | NM_005037:NM_015869:NM_138711:NM_138712:                |
| 10891  | PPARGC1A     | peroxisome proliferative activated receptor, gamma, coactivator 1, alp | 0.18  | TAGAATAGCCATGTACTATAA  | NM_013261: | NM_013261:                                              |
| 10891  | PPARGC1A     | peroxisome proliferative activated receptor, gamma, coactivator 1, alp | -0.09 | CTGGAAGACATGATACACCTA  | NM_013261: | NM_013261:                                              |
| 133522 | PPARGC1B     | peroxisome proliferative activated receptor, gamma, coactivator 1, bet | -1.00 | TCCCTTCAACCAGACATCAA   | NM_133263: | NM_133263:                                              |
| 133522 | PPARGC1B     | peroxisome proliferative activated receptor, gamma, coactivator 1, bet | -5.63 | AAGCATAGTCTAGGCAAAAGAA | NM_133263: | NM_133263:                                              |
| 5471   | PPAT         | phosphoribosyl pyrophosphate amidotransferase                          | 0.68  | AAGTCCAAAGTATCATCTTATA | NM_002703: | NM_002703:                                              |
| 5471   | PPAT         | phosphoribosyl pyrophosphate amidotransferase                          | 0.17  | TACCAAGTGGGATAACTGAA   | NM_002703: | NM_002703:                                              |
| 5473   | PPBP         | pro-platelet basic protein (chemokine (C-X-C motif) ligand 7)          | -0.96 | AACCTCTAATCTTGCCTAA    | NM_002704: | NM_002704:                                              |
| 5473   | PPBP         | pro-platelet basic protein (chemokine (C-X-C motif) ligand 7)          | -0.65 | AAGCGTGTTCACCCCTCTA    | NM_002704: | NM_002704:                                              |
| 5475   | PPEF1        | protein phosphatase, EF-hand calcium binding domain 1                  | 0.13  | CAGCATTAGTACTACATATT   | NM_006240: | NM_006240:NM_152224:NM_152225:NM_152226:NM_152223:      |
| 5475   | PPEF1        | protein phosphatase, EF-hand calcium binding domain 1                  | 0.29  | CCCAATCGGTACAATCGTGTGA | NM_006240: | NM_006240:NM_152224:NM_152225:NM_152226:NM_152223:      |
| 5470   | PPEF2 (prote | protein phosphatase, EF-hand calcium binding domain 2                  | 1.31  | CACATGAATATCGACATTACA  | NM_006239: | NM_152933:NM_006239:NM_152934:                          |
| 5470   | PPEF2 (prote | protein phosphatase, EF-hand calcium binding domain 2                  | -0.22 | CTGGCAGGAGCATGGCGCTTAA | NM_006239: | NM_152933:NM_006239:NM_152934:                          |
| 8500   | PPF1A1       | protein tyrosine phosphatase, receptor type, I polypeptide (PTPRF), in | -0.59 | AACGGCTATTTAATATGTTA   | NM_177423: | NM_177423:                                              |
| 8500   | PPF1A1       | protein tyrosine phosphatase, receptor type, I polypeptide (PTPRF), in | 0.68  | CACGAGGTTGGTCATGAAAGA  | NM_177423: | NM_003626:NM_177423:                                    |
| 8499   | PPF1A2       | protein tyrosine phosphatase, receptor type, I polypeptide (PTPRF), in | -0.78 | AACGTTTGGGTGACTCATGAA  | NM_003625: | NM_003625:                                              |
| 8499   | PPF1A2       | protein tyrosine phosphatase, receptor type, I polypeptide (PTPRF), in | -0.73 | TACCAGCTGGATTGAGTTAA   | NM_003625: | NM_003625:                                              |
| 8541   | PPF1A3       | protein tyrosine phosphatase, receptor type, I polypeptide (PTPRF), in | -0.76 | ACGGCTAACATATGACCGGAA  | NM_003660: | NM_003660:                                              |
| 8541   | PPF1A3       | protein tyrosine phosphatase, receptor type, I polypeptide (PTPRF), in | 0.70  | CACGGTAAAGAAAGACTGTTT  | NM_003660: | NM_003660:                                              |
| 8497   | PPF1A4 (prot | protein tyrosine phosphatase, receptor type, I polypeptide (PTPRF), in | -1.54 | CAGGATAGTGGTCCATTTCA   | AK126624:  | NM_015053:                                              |
| 8497   | PPF1A4 (prot | protein tyrosine phosphatase, receptor type, I polypeptide (PTPRF), in | 0.61  | TGGTGTGTACGTCCCAATAA   | AK126624:  | NM_015053:                                              |
| 5476   | PPGB         | protective protein for beta-galactosidase (galactosialidosis)          | -0.39 | CGGCCCTGGTTAGTGAAGTA   | NM_000308: | NM_000308:                                              |
| 5476   | PPGB         | protective protein for beta-galactosidase (galactosialidosis)          | 1.45  | ATACGAGATCCTATTATATAA  | NM_000308: | NM_000308:                                              |
| 5479   | PPIB         | peptidylprolyl isomerase B (cyclophilin B)                             | 0.77  | AACGCAAAATCCATCGGTGA   | NM_000942: | NM_000942:                                              |
| 5479   | PPIB         | peptidylprolyl isomerase B (cyclophilin B)                             | 1.41  | GTGGTGTGGCCAAAGTTCTA   | NM_000942: | NM_000942:                                              |
| 23759  | PPIL2        | peptidylprolyl isomerase (cyclophilin)-like 2                          | -0.18 | CAGGACAGCCCTATTATACA   | NM_014337: | NM_014337:                                              |
| 23759  | PPIL2        | peptidylprolyl isomerase (cyclophilin)-like 2                          | -0.61 | AAGGAGGAGATCCGCAATGAT  | NM_014337: | NM_148175:NM_148176:NM_014337:                          |
| 122769 | PPIL5        | peptidylprolyl isomerase (cyclophilin)-like 5                          | 0.60  | CACGACCAATATACATAATA   | NM_152329: | NM_152329:                                              |
| 122769 | PPIL5        | peptidylprolyl isomerase (cyclophilin)-like 5                          | -0.07 | ATGTGTATAGTTACTCATTTA  | NM_152329: | NM_152329:NM_203466:NM_203467:                          |
| 5494   | PPM1A        | protein phosphatase 1A (formerly 2C), magnesium-dependent, alpha i     | 0.70  | AAGCGTATTCAAACCATAA    | NM_021003: | NM_177952:NM_021003:                                    |
| 5494   | PPM1A        | protein phosphatase 1A (formerly 2C), magnesium-dependent, alpha i     | 0.12  | TTCATGAGTATTGACGGTAA   | NM_021003: | NM_177952:NM_021003:                                    |
| 5495   | PPM1B        | protein phosphatase 1B (formerly 2C), magnesium-dependent, beta is     | -0.61 | CACCTAAGCATATCTACTTTA  | NM_002706: | NM_001033557:NM_001033556:NM_002706:NM_177968:          |
| 5495   | PPM1B        | protein phosphatase 1B (formerly 2C), magnesium-dependent, beta is     | 1.21  | CGAGATAACATGAGTATTGTA  | NM_002706: | NM_001033557:NM_177969:NM_001033556:NM_02706:NM_177968: |
| 8493   | PPM1D        | protein phosphatase 1D magnesium-dependent, delta isoform              | -0.32 | ACGGTCTTCTAGCACATCA    | NM_003620: | NM_003620:                                              |
| 8493   | PPM1D        | protein phosphatase 1D magnesium-dependent, delta isoform              | 0.66  | CTCGCGCTGCTGGAAGATAA   | NM_003620: | NM_003620:                                              |
| 22843  | PPM1E        | protein phosphatase 1E (PP2C domain containing)                        | -0.06 | CCCATTTAGGTCTGACTATAA  | NM_014906: | NM_014906:                                              |
| 22843  | PPM1E        | protein phosphatase 1E (PP2C domain containing)                        | 0.92  | GAGGCGGTTTATAGTCAGAAA  | NM_014906: | NM_014906:                                              |
| 9647   | PPM1F        | protein phosphatase 1F (PP2C domain containing)                        | 0.61  | ATGTTGGCCCAACAACATGA   | NM_014634: | NM_014634:                                              |
| 9647   | PPM1F        | protein phosphatase 1F (PP2C domain containing)                        | -5.19 | CACCTGGTGTCTGATTCATA   | NM_014634: | NM_014634:                                              |
| 5496   | PPM1G        | protein phosphatase 1G (formerly 2C), magnesium-dependent, gamm        | -8.92 | CAGGACCTGAGGACTCAACTA  | NM_002707: | NM_177983:NM_002707:                                    |
| 5496   | PPM1G        | protein phosphatase 1G (formerly 2C), magnesium-dependent, gamm        | -2.50 | CCAGAGGATGAAGTAGAACTA  | NM_002707: | NM_177983:NM_002707:                                    |
| 151742 | PPM1L        | protein phosphatase 1 (formerly 2C)-like                               | 0.31  | CAGGACTACGAGAAGACAAA   | NM_139245: | NM_139245:                                              |
| 151742 | PPM1L        | protein phosphatase 1 (formerly 2C)-like                               | -0.59 | CTGGTGGTCTAGGCTCTATAA  | NM_139245: | NM_139245:                                              |
| 132160 | PPM1M        | protein phosphatase 1M (PP2C domain containing)                        | -0.12 | CAGAGTACTTTACAACCTAA   | NM_144641: | NM_144641:                                              |
| 132160 | PPM1M        | protein phosphatase 1M (PP2C domain containing)                        | 0.77  | CCCAGAGACTCGGATTATCAA  | NM_144641: | NM_144641:                                              |
| 54704  | PPM2C        | protein phosphatase 2C, magnesium-dependent, catalytic subunit         | 0.25  | ACCATTAAAGCCACAGGATA   | NM_018444: | NM_018444:                                              |
| 54704  | PPM2C        | protein phosphatase 2C, magnesium-dependent, catalytic subunit         | 0.59  | CAAGATAGTATATTATACA    | NM_018444: | NM_018444:                                              |
| 51400  | PPME1        | protein phosphatase methyltransferase 1                                | -1.73 | AACATCGAGCTCTGTGTA     | NM_016147: | NM_016147:                                              |
| 51400  | PPME1        | protein phosphatase methyltransferase 1                                | 0.04  | AGGCGATACATCTGAGTTCAA  | NM_016147: | NM_016147:                                              |
| 5498   | PPOX         | protoporphyrinogen oxidase                                             | -0.10 | CTGCTTGGTCCATCTACACAA  | NM_000309: | NM_000309:                                              |
| 5498   | PPOX         | protoporphyrinogen oxidase                                             | -3.04 | CAGGAAGCAGCTGCTACACAA  | NM_000309: | NM_000309:                                              |
| 5499   | PPP1CA       | protein phosphatase 1, catalytic subunit, alpha isoform                | -0.09 | AAGAGACGCTACAACATCAA   | NM_002708: | NM_002708:NM_206873:NM_001008709:                       |
| 5499   | PPP1CA       | protein phosphatase 1, catalytic subunit, alpha isoform                | -5.11 | CCGCAATTCGCCAAAGCCAA   | NM_002708: | NM_002708:NM_206873:NM_001008709:                       |
| 5500   | PPP1CB       | protein phosphatase 1, catalytic subunit, beta isoform                 | -0.69 | TACGAGGATGTCGCCAGGAA   | NM_002709: | NM_002709:NM_206876:                                    |
| 5500   | PPP1CB       | protein phosphatase 1, catalytic subunit, beta isoform                 | -1.23 | TAGGAATAGTCCGGCTGAA    | NM_002709: | NM_002709:NM_206876:NM_206877:                          |
| 5501   | PPP1CC       | protein phosphatase 1, catalytic subunit, gamma isoform                | 1.01  | AACATCGACAGCATTTCCAA   | NM_002710: | NM_002710:                                              |
| 5501   | PPP1CC       | protein phosphatase 1, catalytic subunit, gamma isoform                | -0.85 | CTGGTTATAACAGCAATGAA   | NM_002710: | NM_002710:                                              |
| 5514   | PPP1R10      | protein phosphatase 1, regulatory subunit 10                           | -1.88 | CCGAGCTGCTGAGAAAGATA   | NM_002714: | NM_002714:                                              |
| 5514   | PPP1R10      | protein phosphatase 1, regulatory subunit 10                           | -2.92 | CCGAAGGACCGTCACTACATA  | NM_002714: | NM_002714:                                              |
| 6992   | PPP1R11      | protein phosphatase 1, regulatory (inhibitor) subunit 11               | -2.71 | AACATGAGTGAAGCAACCTTA  | NM_021959: | NM_021959:NM_170781:                                    |
| 6992   | PPP1R11      | protein phosphatase 1, regulatory (inhibitor) subunit 11               | 0.50  | CGCCCTAACTTTGCTGCTAA   | NM_021959: | NM_021959:NM_170781:                                    |
| 4659   | PPP1R12A     | protein phosphatase 1, regulatory (inhibitor) subunit 12A              | 1.08  | ATAGTACTCAACCATAATTA   | NM_002480: | NM_002480:                                              |
| 4659   | PPP1R12A     | protein phosphatase 1, regulatory (inhibitor) subunit 12A              | -0.29 | CAGAATTAACCCGTGAGTTAA  | NM_002480: | NM_002480:                                              |
| 4660   | PPP1R12B     | protein phosphatase 1, regulatory (inhibitor) subunit 12B              | -0.25 | CAGGGTGTTCCTCTAAAGAA   | NM_002481: | NM_032105:NM_002481:NM_032103:NM_032104:                |
| 4660   | PPP1R12B     | protein phosphatase 1, regulatory (inhibitor) subunit 12B              | -3.76 | CGGGAGGTAGTAACTACAAA   | NM_002481: | NM_032105:NM_002481:NM_032103:NM_032104:                |
| 54776  | PPP1R12C     | protein phosphatase 1, regulatory (inhibitor) subunit 12C              | -2.27 | CAGCGGACCTCAACCCAGAA   | NM_017607: | NM_017607:                                              |
| 54776  | PPP1R12C     | protein phosphatase 1, regulatory (inhibitor) subunit 12C              | -7.15 | CAGGAGGACCTCGGAACCAA   | NM_017607: | NM_017607:                                              |
| 23368  | PPP1R13B     | protein phosphatase 1, regulatory (inhibitor) subunit 13B              | -0.40 | CGCGATGATGCCGATGATTT   | NM_015316: | NM_015316:                                              |
| 23368  | PPP1R13B     | protein phosphatase 1, regulatory (inhibitor) subunit 13B              | 0.04  | CGGGTGGAGAGTCCGTTTAA   | NM_015316: | NM_015316:                                              |
| 94274  | PPP1R14A     | protein phosphatase 1, regulatory (inhibitor) subunit 14A              | 0.73  | CCCGATGAGATCAACATTGAT  | NM_033256: | NM_033256:                                              |
| 94274  | PPP1R14A     | protein phosphatase 1, regulatory (inhibitor) subunit 14A              | 1.59  | TTGTATTTAATGGTTCGTAA   | NM_033256: | NM_033256:                                              |
| 81706  | PPP1R14C     | protein phosphatase 1, regulatory (inhibitor) subunit 14C              | -2.26 | AAGAGCTGCTTCCGGATAA    | NM_030949: | NM_030949:                                              |
| 81706  | PPP1R14C     | protein phosphatase 1, regulatory (inhibitor) subunit 14C              | -0.58 | TAAAGTTGATGAACCCCTAA   | NM_030949: | NM_030949:                                              |
| 54866  | PPP1R14D     | protein phosphatase 1, regulatory (inhibitor) subunit 14D              | 0.40  | CAGGAGCTCTCCAGGATCAA   | NM_017726: | NM_017726:                                              |
| 54866  | PPP1R14D     | protein phosphatase 1, regulatory (inhibitor) subunit 14D              | -0.60 | CGCCTGACAGTGAAGATGTA   | NM_017726: | NM_017726:                                              |

|        |              |                                                                          |       |                        |            |                                                                                                              |
|--------|--------------|--------------------------------------------------------------------------|-------|------------------------|------------|--------------------------------------------------------------------------------------------------------------|
| 23645  | PPP1R15A     | protein phosphatase 1, regulatory (inhibitor) subunit 15A                | 0.20  | CCAGTTGTTGATCTTATGCAA  | NM_014330: | NM_014330:                                                                                                   |
| 23645  | PPP1R15A     | protein phosphatase 1, regulatory (inhibitor) subunit 15A                | 0.05  | TGGGTTTATATAAGGAATAAA  | NM_014330: | NM_014330:                                                                                                   |
| 84919  | PPP1R15B     | protein phosphatase 1, regulatory (inhibitor) subunit 15B                | 1.02  | AAGTGCTAATTTGGAGCCAA   | NM_032833: | NM_032833:                                                                                                   |
| 84919  | PPP1R15B     | protein phosphatase 1, regulatory (inhibitor) subunit 15B                | -2.13 | CAGGGTTACTACCTCAGTTTA  | NM_032833: | NM_032833:                                                                                                   |
| 26051  | PPP1R16B     | protein phosphatase 1, regulatory (inhibitor) subunit 16B                | 0.51  | ACGGGCGAGAGTAGCAGTGAA  | NM_015568: | NM_015568:                                                                                                   |
| 26051  | PPP1R16B     | protein phosphatase 1, regulatory (inhibitor) subunit 16B                | -3.32 | TCGCAGATCTTTGATATCGTA  | NM_015568: | NM_015568:                                                                                                   |
| 5502   | PPP1R1A (pr  | protein phosphatase 1, regulatory (inhibitor) subunit 1A                 | -3.91 | AAGGATCACACCCACAATGAA  | NM_006741: | NM_006741:                                                                                                   |
| 5502   | PPP1R1A (pr  | protein phosphatase 1, regulatory (inhibitor) subunit 1A                 | -0.73 | TTGCCAGATACATACCTAAA   | NM_006741: | NM_006741:                                                                                                   |
| 84152  | PPP1R1B      | protein phosphatase 1, regulatory (inhibitor) subunit 1B (dopamine an    | -1.70 | ATAAATCTTTGTAATAACAA   | NM_181505: | NM_181505:                                                                                                   |
| 84152  | PPP1R1B      | protein phosphatase 1, regulatory (inhibitor) subunit 1B (dopamine an    | 1.29  | CAGCTTGTTTGAAGCCCTTGA  | NM_181505: | NM_181505:                                                                                                   |
| 151242 | PPP1R1C (pr  | protein phosphatase 1, regulatory (inhibitor) subunit 1C                 | -0.01 | CTCGATCTGGAATACAGCTA   | XM_087137: | XM_087137:                                                                                                   |
| 151242 | PPP1R1C (pr  | protein phosphatase 1, regulatory (inhibitor) subunit 1C                 | 0.16  | TTGGAACCTGGTTAGTACCTAA | XM_087137: | XM_087137:                                                                                                   |
| 5504   | PPP1R2       | protein phosphatase 1, regulatory (inhibitor) subunit 2                  | 0.41  | CACATACAGTACTGTAATAAA  | NM_006241: | NM_006241:                                                                                                   |
| 5504   | PPP1R2       | protein phosphatase 1, regulatory (inhibitor) subunit 2                  | -2.98 | TACCACATGATTAGAACAA    | NM_006241: | NM_006241:                                                                                                   |
| 80316  | PPP1R2P9     | protein phosphatase 1, regulatory (inhibitor) subunit 2 pseudogene 9     | 0.64  | ACGTACAGAGATTACGATTTA  | NM_025210: | NR_002191:                                                                                                   |
| 80316  | PPP1R2P9     | protein phosphatase 1, regulatory (inhibitor) subunit 2 pseudogene 9     | -0.78 | CTGGAGGGCGGTGGACGGCTA  | NM_025210: | NR_002191:                                                                                                   |
| 5506   | PPP1R3A      | protein phosphatase 1, regulatory (inhibitor) subunit 3A (glycogen and   | -0.74 | CACATCAGTATAGGCCATCAA  | NM_002711: | NM_002711:                                                                                                   |
| 5506   | PPP1R3A      | protein phosphatase 1, regulatory (inhibitor) subunit 3A (glycogen and   | -0.44 | TCAGGTGGGATTAATCTGAA   | NM_002711: | NM_002711:                                                                                                   |
| 79660  | PPP1R3B      | protein phosphatase 1, regulatory (inhibitor) subunit 3B                 | 0.91  | CACCAAGTCTTATACGTTA    | NM_024607: | NM_024607:                                                                                                   |
| 79660  | PPP1R3B      | protein phosphatase 1, regulatory (inhibitor) subunit 3B                 | 0.55  | CCCGTAGATAGCATTCAA     | NM_024607: | NM_024607:                                                                                                   |
| 5507   | PPP1R3C      | protein phosphatase 1, regulatory (inhibitor) subunit 3C                 | -0.52 | TACGATGAATTCACGACGA    | NM_005398: | NM_005398:                                                                                                   |
| 5507   | PPP1R3C      | protein phosphatase 1, regulatory (inhibitor) subunit 3C                 | -0.31 | TCGGGAGAATCAAGATCTTAA  | NM_005398: | NM_005398:                                                                                                   |
| 5509   | PPP1R3D      | protein phosphatase 1, regulatory subunit 3D                             | 2.41  | CAGGTACCCACCAACTTTATA  | NM_006242: | NM_006242:                                                                                                   |
| 5509   | PPP1R3D      | protein phosphatase 1, regulatory subunit 3D                             | 1.03  | CTGAGTTAGGCAATCCTTAA   | NM_006242: | NM_006242:                                                                                                   |
| 89801  | PPP1R3F      | protein phosphatase 1, regulatory (inhibitor) subunit 3F                 | -0.12 | CGGGTGTGTCGCGTCTGTA    | NM_033215: | NM_033215:                                                                                                   |
| 89801  | PPP1R3F      | protein phosphatase 1, regulatory (inhibitor) subunit 3F                 | -1.37 | AACATGGATGATAACACCTTT  | NM_033215: | NM_033215:                                                                                                   |
| 5510   | PPP1R7       | protein phosphatase 1, regulatory subunit 7                              | 0.60  | CACAAACCAATGGCAATAAA   | NM_002712: | NM_002712:                                                                                                   |
| 5510   | PPP1R7       | protein phosphatase 1, regulatory subunit 7                              | 1.33  | TCAGATGCCGTTGCAATTTAA  | NM_002712: | NM_002712:                                                                                                   |
| 5511   | PPP1R8       | protein phosphatase 1, regulatory (inhibitor) subunit 8                  | -2.73 | CAGCCCGAGGAATCAAGAAA   | NM_002713: | NM_002713:NM_138558:                                                                                         |
| 5511   | PPP1R8       | protein phosphatase 1, regulatory (inhibitor) subunit 8                  | 0.29  | TACAAATAAAGATGCCGTAAA  | NM_002713: | NM_014110:NM_002713:NM_138558:                                                                               |
| 55607  | PPP1R9A      | protein phosphatase 1, regulatory (inhibitor) subunit 9A                 | 0.65  | CTCCAATGTCAACAGAAATTA  | XM_374491: | XM_374491:XM_371933:                                                                                         |
| 55607  | PPP1R9A      | protein phosphatase 1, regulatory (inhibitor) subunit 9A                 | 1.30  | GAGGTAATATTTATCCTCTA   | XM_374491: | XM_374491:XM_371933:                                                                                         |
| 84687  | PPP1R9B      | protein phosphatase 1, regulatory subunit 9B, spinophilin                | 1.26  | CACCTCGAAGCTGGTCAGCAA  | NM_032595: | NM_032595:                                                                                                   |
| 84687  | PPP1R9B      | protein phosphatase 1, regulatory subunit 9B, spinophilin                | -0.11 | CCCGGAGGTGGCGAAGATTA   | NM_032595: | NM_032595:                                                                                                   |
| 5515   | PPP2CA       | protein phosphatase 2 (formerly 2A), catalytic subunit, alpha isoform    | 0.80  | ATGGAACCTGACGATACCTCA  | NM_002715: | NM_002715:                                                                                                   |
| 5515   | PPP2CA       | protein phosphatase 2 (formerly 2A), catalytic subunit, alpha isoform    | -2.62 | CACAAATCATTTGGAGCTTAA  | NM_002715: | NM_002715:                                                                                                   |
| 5516   | PPP2CB       | protein phosphatase 2 (formerly 2A), catalytic subunit, beta isoform     | 0.00  | CCGACAAATTAACCAAGTATA  | NM_004156: | NM_004156:NM_001009552:                                                                                      |
| 5516   | PPP2CB       | protein phosphatase 2 (formerly 2A), catalytic subunit, beta isoform     | 1.43  | TGGGATCTGCTTGGCAATTA   | NM_004156: | NM_004156:NM_001009552:                                                                                      |
| 5518   | PPP2R1A      | protein phosphatase 2 (formerly 2A), regulatory subunit A (PR 65), alp   | 1.68  | ACGGGTGGAACATCTCTTAA   | NM_014225: | NM_014225:                                                                                                   |
| 5518   | PPP2R1A      | protein phosphatase 2 (formerly 2A), regulatory subunit A (PR 65), alp   | 0.01  | CTGGTGTCCGATGCCAACCAA  | NM_014225: | NM_014225:                                                                                                   |
| 5519   | PPP2R1B      | protein phosphatase 2 (formerly 2A), regulatory subunit A (PR 65), bet   | -5.66 | CAGAAGTTAGCAAGATGAA    | NM_002716: | NM_002716:NM_181699:                                                                                         |
| 5519   | PPP2R1B      | protein phosphatase 2 (formerly 2A), regulatory subunit A (PR 65), bet   | -4.88 | CAGGAATAACTACTAAGCAA   | NM_002716: | NM_002716:NM_181699:                                                                                         |
| 5520   | PPP2R2A      | protein phosphatase 2 (formerly 2A), regulatory subunit B (PR 52), alp   | -1.47 | ATGGAAGGTATAGAGATCCTA  | NM_002717: | NM_002717:                                                                                                   |
| 5520   | PPP2R2A      | protein phosphatase 2 (formerly 2A), regulatory subunit B (PR 52), alp   | -0.34 | CTGCAGATGATTTGCGGATTA  | NM_002717: | NM_002717:                                                                                                   |
| 5521   | PPP2R2B      | protein phosphatase 2 (formerly 2A), regulatory subunit B (PR 52), bet   | -0.16 | CAGGAAATGATTGGAATAGAA  | NM_004576: | NM_181678:NM_181677:NM_181674:NM_181675:<br>NM_181676:NM_004576:<br>NM_181678:NM_181677:NM_181674:NM_181675: |
| 5521   | PPP2R2B      | protein phosphatase 2 (formerly 2A), regulatory subunit B (PR 52), bet   | -2.66 | CAGGACTACTGACCGTCAA    | NM_004576: | NM_181678:NM_004576:                                                                                         |
| 5522   | PPP2R2C      | protein phosphatase 2 (formerly 2A), regulatory subunit B (PR 52), gai   | 1.95  | ACCGCTCAATCTTCTCGGAAA  | NM_020416: | NM_181676:NM_020416:                                                                                         |
| 5522   | PPP2R2C      | protein phosphatase 2 (formerly 2A), regulatory subunit B (PR 52), gai   | -1.49 | CCGGACTACCTTACAGTCAA   | NM_020416: | NM_181676:NM_020416:                                                                                         |
| 55844  | PPP2R2D      | protein phosphatase 2, regulatory subunit B, delta isoform               | -0.74 | CAGAGACTACCTGCGGTGAA   | BC047379:  | NM_018461:NM_001003656:                                                                                      |
| 55844  | PPP2R2D      | protein phosphatase 2, regulatory subunit B, delta isoform               | 0.42  | TAGGTGGTTACCAACACAGAA  | BC047379:  | NM_018461:NM_001003656:                                                                                      |
| 5523   | PPP2R3A      | protein phosphatase 2 (formerly 2A), regulatory subunit B', alpha        | -0.27 | ACCTGTAGTAATCATGACAAA  | NM_181897: | NM_002718:NM_181897:                                                                                         |
| 5523   | PPP2R3A      | protein phosphatase 2 (formerly 2A), regulatory subunit B', alpha        | -2.23 | CAGGAGGATTTCACTCCCTCA  | NM_181897: | NM_002718:NM_181897:                                                                                         |
| 28227  | PPP2R3B      | protein phosphatase 2 (formerly 2A), regulatory subunit B', beta         | 0.04  | CACGTGTCTCTGTCACGTGAA  | NM_199326: | NM_199326:                                                                                                   |
| 28227  | PPP2R3B      | protein phosphatase 2 (formerly 2A), regulatory subunit B', beta         | -0.04 | CTGGCCTGAGTGAGCAGTAA   | NM_199326: | NM_199326:                                                                                                   |
| 5524   | PPP2R4       | protein phosphatase 2A, regulatory subunit B' (PR 53)                    | -0.74 | CTCCGGTGGATGACCAATA    | NM_178003: | NM_178000:NM_178001:NM_021131:NM_178003:<br>NM_178002:<br>NM_178000:NM_178001:NM_021131:NM_178003:           |
| 5524   | PPP2R4       | protein phosphatase 2A, regulatory subunit B' (PR 53)                    | -4.99 | CTGAGGTGGCTGTTACTCTAA  | NM_178003: | NM_178002:                                                                                                   |
| 5525   | PPP2R5A      | protein phosphatase 2, regulatory subunit B (B56), alpha isoform         | 0.01  | CAGCTATTTCTGATATAGTAA  | NM_006243: | NM_006243:                                                                                                   |
| 5525   | PPP2R5A      | protein phosphatase 2, regulatory subunit B (B56), alpha isoform         | -0.78 | CTGTATCATGGCCATAGTATA  | NM_006243: | NM_006243:                                                                                                   |
| 5526   | PPP2R5B      | protein phosphatase 2, regulatory subunit B (B56), beta isoform          | 0.04  | CCGATGATCTCAGTGAATAT   | NM_006244: | NM_006244:                                                                                                   |
| 5526   | PPP2R5B      | protein phosphatase 2, regulatory subunit B (B56), beta isoform          | 2.33  | CCGGTTCATCTATGAATTGCGA | NM_006244: | NM_006244:                                                                                                   |
| 5527   | PPP2R5C      | protein phosphatase 2, regulatory subunit B (B56), gamma isoform         | 0.13  | AACGAGTCTGTTAAGTGAAA   | NM_002719: | NM_178586:NM_178587:NM_178588:NM_002719:                                                                     |
| 5527   | PPP2R5C      | protein phosphatase 2, regulatory subunit B (B56), gamma isoform         | -2.92 | CCCATTTGGAACAAGTAAGAAA | NM_002719: | NM_178588:                                                                                                   |
| 5529   | PPP2R5E (pr  | protein phosphatase 2, regulatory subunit B (B56), epsilon isoform       | -0.43 | CACCCGGATGCAAACTCTAAT  | NM_006246: | NM_006246:                                                                                                   |
| 5529   | PPP2R5E (pr  | protein phosphatase 2, regulatory subunit B (B56), epsilon isoform       | 1.61  | CCGGTGATATGCAATAGGAA   | NM_006246: | NM_006246:                                                                                                   |
| 5530   | PPP3CA       | protein phosphatase 3 (formerly 2B), catalytic subunit, alpha isoform (i | -0.27 | TAGGATATAGCATAACCCAAA  | NM_000944: | NM_000944:                                                                                                   |
| 5530   | PPP3CA       | protein phosphatase 3 (formerly 2B), catalytic subunit, alpha isoform (i | -5.36 | TGGCCTGTATGGGACTGTAA   | NM_000944: | NM_000944:                                                                                                   |
| 5532   | PPP3CB       | protein phosphatase 3 (formerly 2B), catalytic subunit, beta isoform (c  | 0.00  | AAGGTTTGGATAGGATCAAT   | NM_021132: | NM_021132:                                                                                                   |
| 5532   | PPP3CB       | protein phosphatase 3 (formerly 2B), catalytic subunit, beta isoform (c  | -1.70 | TAGGAGATTAGATAGATTCAA  | NM_021132: | NM_021132:                                                                                                   |
| 5533   | PPP3CC       | protein phosphatase 3 (formerly 2B), catalytic subunit, gamma isoform    | 0.51  | CAGGCTTTCCATCACTTATTA  | NM_005605: | NM_005605:                                                                                                   |
| 5533   | PPP3CC       | protein phosphatase 3 (formerly 2B), catalytic subunit, gamma isoform    | -0.11 | CCGAGGGTGCTCTTATTCTTA  | NM_005605: | NM_005605:                                                                                                   |
| 5534   | PPP3R1       | protein phosphatase 3 (formerly 2B), regulatory subunit B, 19kDa, alp    | -0.37 | ATCCTTTAGTACAGCAGTAA   | NM_000945: | NM_000945:                                                                                                   |
| 5534   | PPP3R1       | protein phosphatase 3 (formerly 2B), regulatory subunit B, 19kDa, alp    | 0.42  | GCCTATATAATTGGTAAGTGA  | NM_000945: | NM_000945:                                                                                                   |
| 5531   | PPP4C        | protein phosphatase 4 (formerly X), catalytic subunit                    | 0.00  | CGGCAATCGACCGAAGCAA    | NM_002720: | NM_002720:                                                                                                   |
| 5531   | PPP4C        | protein phosphatase 4 (formerly X), catalytic subunit                    | -0.14 | TCGCCAGATCACGAGGTCTA   | NM_002720: | NM_002720:                                                                                                   |
| 9989   | PPP4R1       | protein phosphatase 4, regulatory subunit 1                              | 2.02  | CAGGCGTGTGATGATCAGTAT  | NM_005134: | NM_005134:                                                                                                   |
| 9989   | PPP4R1       | protein phosphatase 4, regulatory subunit 1                              | 2.20  | TGGGAGTGCAGCTCTTTAA    | NM_005134: | NM_005134:                                                                                                   |
| 5536   | PPP5C        | protein phosphatase 5, catalytic subunit                                 | -2.83 | CCCGTTGGCCCGATGCATCAA  | NM_006247: | NM_006247:                                                                                                   |
| 5536   | PPP5C        | protein phosphatase 5, catalytic subunit                                 | -1.91 | CTCGTGGAAACACACTCAA    | NM_006247: | NM_006247:                                                                                                   |
| 5537   | PPP6C (prote | protein phosphatase 6, catalytic subunit                                 | 1.89  | CACAAATGAGTTTGTCAATAT  | NM_002721: | NM_002721:                                                                                                   |
| 5537   | PPP6C (prote | protein phosphatase 6, catalytic subunit                                 | -1.80 | CAGCAGCAAGTTGTTATTCA   | NM_002721: | NM_002721:                                                                                                   |
| 23082  | PPRC1        | peroxisome proliferative activated receptor, gamma, coactivator-relate   | -1.15 | AAGGGTGGTCTTCAATGGAAA  | NM_015062: | NM_015062:                                                                                                   |
| 23082  | PPRC1        | peroxisome proliferative activated receptor, gamma, coactivator-relate   | -0.41 | CAGACTAATAAACATCACTAA  | NM_015062: | NM_015062:                                                                                                   |
| 5538   | PPT1         | palmitoyl-protein thioesterase 1 (ceroid-lipofuscinosis, neuronal 1, inf | 0.91  | AACGTAATCTACCATTCTCTA  | NM_000310: | NM_000310:                                                                                                   |
| 5538   | PPT1         | palmitoyl-protein thioesterase 1 (ceroid-lipofuscinosis, neuronal 1, inf | 0.21  | AACCCACATTAGAGTGTCTAA  | NM_000310: | NM_000310:                                                                                                   |
| 160760 | PPTC7        | PTC7 protein phosphatase homolog (S. cerevisiae)                         | 0.66  | AAAGGGATGGTCAAGTCTAA   | NM_139283: | NM_139283:                                                                                                   |
| 160760 | PPTC7        | PTC7 protein phosphatase homolog (S. cerevisiae)                         | -1.33 | CACAATTGACGTATGATGAA   | NM_139283: | NM_139283:                                                                                                   |
| 160760 | PPTC7        | PTC7 protein phosphatase homolog (S. cerevisiae)                         | -3.03 | TAGCGTAACATGATACATCTA  | AK001795:  | NM_139283:                                                                                                   |
| 5540   | PPYR1        | pancreatic polypeptide receptor 1                                        | -1.43 | CAGGCTCTCCACTTAGCTAA   | NM_005972: | NM_005972:                                                                                                   |
| 5540   | PPYR1        | pancreatic polypeptide receptor 1                                        | 0.49  | CTGAGAGGCGTCATCCCTCAA  | NM_005972: | NM_005972:                                                                                                   |
| 84106  | PRAM1        | PML-RARA regulated adaptor molecule 1                                    | -2.93 | CCGGAGGATCAAAAGCAAGTT  | NM_032152: | NM_032152:                                                                                                   |
| 84106  | PRAM1        | PML-RARA regulated adaptor molecule 1                                    | -0.10 | CCGCAAGTTCTCACAGCCTGA  | NM_032152: | NM_032152:                                                                                                   |
| 5544   | PRB3         | proline-rich protein BstNI subfamily 3                                   | -1.46 | AAGAAGGTGGTCAATAGCTCA  | NM_006249: | NM_006249:                                                                                                   |
| 5544   | PRB3         | proline-rich protein BstNI subfamily 3                                   | -1.73 | CAAGAAGGTAACAAACCTCAA  | NM_006249: | NM_006249:                                                                                                   |
| 5545   | PRB4         | proline-rich protein BstNI subfamily 4                                   | -1.10 | TCAGCTGAGAGTTCAAGTGAA  | NM_002723: | NM_002723:                                                                                                   |

|        |          |                                                                        |        |                        |            |                                      |
|--------|----------|------------------------------------------------------------------------|--------|------------------------|------------|--------------------------------------|
| 5545   | PRB4     | proline-rich protein BstNI subfamily 4                                 | 1.21   | CAGGAAGAATCTCTCTCCTA   | NM_002723: | NM_002723:                           |
| 5546   | PRCC     | papillary renal cell carcinoma (translocation-associated)              | 0.38   | AGGGATGTCTGTTGAAATAAA  | NM_005973: | NM_199416:NM_005973:                 |
| 5546   | PRCC     | papillary renal cell carcinoma (translocation-associated)              | -0.87  | CAGGGATGTCTGTTGAAATAAA | NM_005973: | NM_199416:NM_005973:                 |
| 5547   | PRCP     | prolylcarboxypeptidase (angiotensinase C)                              | -0.18  | ATGGCATAATTGACTGCTGAA  | NM_005040: | NM_199418:NM_005040:                 |
| 5547   | PRCP     | prolylcarboxypeptidase (angiotensinase C)                              | -5.56  | CAGGTCTGGGATGCCATTAA   | NM_005040: | NM_199418:NM_005040:                 |
| 56981  | PRDM11   | PR domain containing 11                                                | -2.39  | ACGCTACAGTCAGTGTGCAA   | NM_020229: | NM_020229:                           |
| 56981  | PRDM11   | PR domain containing 11                                                | -1.99  | CAGGTTCTGGATAACCCAGAA  | NM_020229: | NM_020229:                           |
| 7799   | PRDM2    | PR domain containing 2, with ZNF domain                                | 0.61   | CAGATGATGTCTACAGCTAA   | NM_015866: | NM_015866:NM_001007257:              |
| 7799   | PRDM2    | PR domain containing 2, with ZNF domain                                | 0.00   | CCCGGTTGATTGAGATCCAAA  | NM_015866: | NM_015866:NM_001007257:              |
| 56978  | PRDM8    | PR domain containing 8                                                 | -1.12  | CGCGCGGCAAGCACAGTTAA   | NM_020226: | NM_020226:                           |
| 56978  | PRDM8    | PR domain containing 8                                                 | -0.08  | CTCGCATAATTGACTCGGAAA  | NM_020226: | NM_020226:                           |
| 7001   | PRDX2    | peroxiredoxin 2                                                        | 1.35   | TGGCGCCTTCAAGAGGTTGAA  | NM_005809: | NM_005809:NM_181737:NM_181738:       |
| 7001   | PRDX2    | peroxiredoxin 2                                                        | -0.03  | TTGGTTCCGGCCGGGCATAAA  | NM_005809: | NM_005809:NM_181737:NM_181738:       |
| 10549  | PRDX4    | peroxiredoxin 4                                                        | -0.15  | AACCTGGTAGTGAACAATAA   | NM_006406: | NM_006406:                           |
| 10549  | PRDX4    | peroxiredoxin 4                                                        | 0.65   | AAGCAAAGCGAAGATTCCAA   | NM_006406: | NM_006406:                           |
| 25824  | PRDX5    | peroxiredoxin 5                                                        | -0.60  | CACCTCGACCTGGCACCCTAA  | NM_012094: | NM_181652:NM_012094:NM_181651:       |
| 25824  | PRDX5    | peroxiredoxin 5                                                        | 1.37   | CTGAGTGTAAATGATGCCCTT  | NM_012094: | NM_012094:                           |
| 9588   | PRDX6    | peroxiredoxin 6                                                        | 1.13   | GTGGCAGAAGTGAAGTTCAA   | NM_004905: | NM_004905:                           |
| 9588   | PRDX6    | peroxiredoxin 6                                                        | 2.29   | TCCGATGATGTGATACATGAAA | NM_004905: | NM_004905:                           |
| 5550   | PREP     | prolyl endopeptidase                                                   | -0.55  | AAGGCGATGTTGGGATAAATA  | NM_002726: | NM_002726:                           |
| 5550   | PREP     | prolyl endopeptidase                                                   | 0.00   | TCCCAAGGCGTACTATTAA    | NM_002726: | NM_002726:                           |
| 9581   | PREPL    | prolyl endopeptidase-like                                              | -1.22  | CAGGAGCATTTGTGTAATTCTA | NM_006036: | NM_006036:                           |
| 9581   | PREPL    | prolyl endopeptidase-like                                              | 0.05   | AAGGATCTTCAGCGTGTAAA   | NM_006036: | NM_006036:                           |
| 5551   | PRF1     | perforin 1 (pore forming protein)                                      | 0.67   | CACCGTGTGGACAATAACAA   | NM_005041: | NM_005041:                           |
| 5551   | PRF1     | perforin 1 (pore forming protein)                                      | -0.71  | CACCGTGTGGAGTCCCGCTCTA | NM_005041: | NM_005041:                           |
| 5554   | PRH1     | proline-rich protein HaellI subfamily 1                                | -0.94  | TGGCATCATGCTCAACTCA    | NM_006250: | NM_006250:                           |
| 85441  | PRIC285  | peroxisomal proliferator-activated receptor A interacting complex 285  | 0.50   | ATGTGATTAGATATTAATTTA  | NM_033405: | NM_033405:NM_01037335:               |
| 85441  | PRIC285  | peroxisomal proliferator-activated receptor A interacting complex 285  | 0.38   | CCCTACTCGTCCGAAATCAA   | NM_033405: | NM_033405:NM_01037335:               |
| 144165 | PRICKLE1 | prickle-like 1 (Drosophila)                                            | 0.05   | CCCATGTAATGAGAAGCTCAA  | NM_153026: | NM_153026:                           |
| 144165 | PRICKLE1 | prickle-like 1 (Drosophila)                                            | 0.34   | CAGTGTAGATTAACATTTGA   | NM_153026: | NM_153026:                           |
| 5557   | PRIM1    | primase, polypeptide 1, 49kDa                                          | -0.37  | CTGAATCTGATGTCAAACATA  | NM_000946: | NM_000946:                           |
| 5557   | PRIM1    | primase, polypeptide 1, 49kDa                                          | 0.40   | CTGGATAGTTGAGTATTTGA   | NM_000946: | NM_000946:                           |
| 5562   | PRKAA1   | protein kinase, AMP-activated, alpha 1 catalytic subunit               | 0.02   | CCCACGATATCTGTACACAA   | NM_006251: | NM_006251:NM_206907:                 |
| 5562   | PRKAA1   | protein kinase, AMP-activated, alpha 1 catalytic subunit               | -1.42  | TGGGATCAGTTGAAACACTAT  | NM_006251: | NM_006251:NM_206907:                 |
| 5562   | PRKAA2   | protein kinase, AMP-activated, alpha 2 catalytic subunit               | -0.11  | ACGACTAAGCCCAATCTTTA   | NM_006252: | NM_006252:                           |
| 5563   | PRKAA2   | protein kinase, AMP-activated, alpha 2 catalytic subunit               | -0.13  | CGGATTCGGATTATCTAATA   | NM_006252: | NM_006252:                           |
| 5564   | PRKAB1   | protein kinase, AMP-activated, beta 1 non-catalytic subunit            | -0.02  | CACGCTAGAAAGTCACATGAA  | NM_006253: | NM_006253:                           |
| 5564   | PRKAB1   | protein kinase, AMP-activated, beta 1 non-catalytic subunit            | -8.68  | CTGGCTATGGAACATAATACA  | NM_006253: | NM_006253:                           |
| 5565   | PRKAB2   | protein kinase, AMP-activated, beta 2 non-catalytic subunit            | 0.76   | ACCCAAGTACTACTATTATA   | NM_005399: | NM_005399:                           |
| 5565   | PRKAB2   | protein kinase, AMP-activated, beta 2 non-catalytic subunit            | 0.66   | TCGAATATTAGTTGGAGTTAA  | NM_005399: | NM_005399:                           |
| 5566   | PRKACA   | protein kinase, cAMP-dependent, catalytic, alpha                       | 0.68   | CAAGGACAACCTCAAACTTATA | NM_002730: | NM_002730:NM_207518:                 |
| 5566   | PRKACA   | protein kinase, cAMP-dependent, catalytic, alpha                       | -0.73  | CAGAAGGTGGTGAAGTGAATA  | NM_002730: | NM_002730:NM_207518:                 |
| 5567   | PRKACB   | protein kinase, cAMP-dependent, catalytic, beta                        | 0.01   | CAGCCTGTGTAGTGTGACAAA  | NM_182948: | NM_182948:NM_002731:                 |
| 5567   | PRKACB   | protein kinase, cAMP-dependent, catalytic, beta                        | -3.70  | CTGACCAATCAAGTACACTAA  | NM_182948: | NM_182948:NM_002731:                 |
| 5568   | PRKACG   | protein kinase, cAMP-dependent, catalytic, gamma                       | 0.54   | AACCAGCTGGATCGCCACTCTA | NM_002732: | NM_002732:                           |
| 5568   | PRKACG   | protein kinase, cAMP-dependent, catalytic, gamma                       | -4.95  | TGGATCGCCACTATGAGAAA   | NM_002732: | NM_002732:                           |
| 5571   | PRKAG1   | protein kinase, AMP-activated, gamma 1 non-catalytic subunit           | -0.40  | CCCTAAGATAATGAGCAACA   | NM_002733: | NM_002733:NM_212461:                 |
| 5571   | PRKAG1   | protein kinase, AMP-activated, gamma 1 non-catalytic subunit           | -0.22  | CTTGCCCTGATTAACCCCTAA  | NM_002733: | NM_002733:NM_212461:                 |
| 51422  | PRKAG2   | protein kinase, AMP-activated, gamma 2 non-catalytic subunit           | 0.03   | AAGCAGCGCCTCAAGCGTTA   | NM_016203: | NM_016203:                           |
| 51422  | PRKAG2   | protein kinase, AMP-activated, gamma 2 non-catalytic subunit           | -3.92  | CGGAAAGCATCTCCCTCGAA   | NM_016203: | NM_016203:                           |
| 53632  | PRKAG3   | protein kinase, AMP-activated, gamma 3 non-catalytic subunit           | 0.28   | CAGATCTAGAGATTGAACAA   | NM_017431: | NM_017431:                           |
| 53632  | PRKAG3   | protein kinase, AMP-activated, gamma 3 non-catalytic subunit           | -1.41  | TAGCCTGTTTGAAGCTGCTA   | NM_017431: | NM_017431:                           |
| 5573   | PRKARI1  | protein kinase, cAMP-dependent, regulatory, type I, alpha (tissue spec | 0.19   | ATGAAATAAATTAATCTCTA   | NM_002734: | NM_002734:NM_212471:NM_212472:       |
| 5573   | PRKARI1  | protein kinase, cAMP-dependent, regulatory, type I, alpha (tissue spec | 0.47   | CAAAATTTGGTGTAGTATTTAA | NM_002734: | NM_002734:NM_212471:NM_212472:       |
| 5575   | PRKARI1B | protein kinase, cAMP-dependent, regulatory, type I, beta               | 0.12   | CAAGGAAGCAATTCAGCGTTA  | NM_002735: | NM_002735:                           |
| 5575   | PRKARI1B | protein kinase, cAMP-dependent, regulatory, type I, beta               | -10.67 | CAGGAGTTGAGGCGGAAGAA   | NM_002735: | NM_002735:                           |
| 5576   | PRKAR2A  | protein kinase, cAMP-dependent, regulatory, type II, alpha             | 0.14   | AACGGCATGTCTCCCAACAA   | NM_004157: | NM_004157:                           |
| 5576   | PRKAR2A  | protein kinase, cAMP-dependent, regulatory, type II, alpha             | -0.03  | AACCTGAAGTTCAGCACTAAA  | NM_004157: | NM_004157:                           |
| 5577   | PRKAR2B  | protein kinase, cAMP-dependent, regulatory, type II, beta              | 0.17   | ACGAAATGATGATTTGTTGAA  | NM_002736: | NM_002736:                           |
| 5577   | PRKAR2B  | protein kinase, cAMP-dependent, regulatory, type II, beta              | -2.16  | CACGCCATTTGGGACTGTCAA  | NM_002736: | NM_002736:                           |
| 5578   | PRKCA    | protein kinase C, alpha                                                | 0.59   | CAAGAGCGTCTTGGAACTCAA  | NM_002737: | NM_002737:                           |
| 5578   | PRKCA    | protein kinase C, alpha                                                | -0.03  | CAGCTGGTATTGCTAACATA   | NM_002737: | NM_002737:                           |
| 5579   | PRKCB1   | protein kinase C, beta 1                                               | -0.11  | CAAGAGCTAAGTAGATGTGTA  | NM_002738: | NM_002738:                           |
| 5579   | PRKCB1   | protein kinase C, beta 1                                               | 0.03   | CGGATGAAACCTGACCCGATTT | NM_002738: | NM_212535:NM_002738:                 |
| 23613  | PRKCBP1  | protein kinase C binding protein 1                                     | -0.36  | AGCGAAGTGTACATAGATTTA  | NM_183048: | NM_183047:NM_183048:NM_012408:       |
| 23613  | PRKCBP1  | protein kinase C binding protein 1                                     | -0.79  | CACCATTTGAACAGTTATCTGA | NM_183048: | NM_183047:NM_183048:NM_012408:       |
| 5580   | PRKCD    | protein kinase C, delta                                                | -0.03  | CAGCAGCAAGTGCACACATCAA | NM_006254: | NM_006254:NM_212539:                 |
| 5580   | PRKCD    | protein kinase C, delta                                                | -0.92  | CAGGTTTATTGTGTGCTAA    | NM_006254: | NM_006254:NM_212539:                 |
| 112464 | PRKCDBP  | protein kinase C, delta binding protein                                | -0.65  | AAGGAGCGAATCCATCATCCA  | NM_145040: | NM_145040:                           |
| 112464 | PRKCDBP  | protein kinase C, delta binding protein                                | -1.53  | CACGCCCTAATAAGGAGGGA   | NM_145040: | NM_145040:                           |
| 5581   | PRKCE    | protein kinase C, epsilon                                              | 0.03   | CACGAAACACCCGATCCCTTA  | NM_005400: | NM_005400:                           |
| 5581   | PRKCE    | protein kinase C, epsilon                                              | -2.47  | CCGACCATGTTGATGTTTCAA  | NM_005400: | NM_005400:                           |
| 5582   | PRKCG    | protein kinase C, gamma                                                | 0.55   | AACGGTGAAGCCACGCTAAA   | NM_002739: | NM_002739:                           |
| 5582   | PRKCG    | protein kinase C, gamma                                                | 0.54   | GACCTTTGTGTTCAACCTGAA  | NM_002739: | NM_002739:                           |
| 5583   | PRKCH    | protein kinase C, eta                                                  | 1.13   | CGCCGTGTGCTCACTCACTGAA | NM_006255: | NM_006255:                           |
| 5583   | PRKCH    | protein kinase C, eta                                                  | 0.21   | GACCCAGATTTGTGGCTTATA  | NM_006255: | NM_006255:                           |
| 5584   | PRKCI    | protein kinase C, iota                                                 | -0.11  | ACGCCGTGGGAAAGCTTTA    | NM_002740: | NM_002740:                           |
| 5584   | PRKCI    | protein kinase C, iota                                                 | -1.56  | CACCCAAATCTCTCTGTGTA   | NM_002740: | NM_002740:                           |
| 5588   | PRKCO    | protein kinase C, theta                                                | 0.13   | CGCCAGCAAGTAACTACTAA   | NM_006257: | NM_006257:                           |
| 5588   | PRKCO    | protein kinase C, theta                                                | -5.80  | CGGGCAGATGTATATCCAGAA  | NM_006257: | NM_006257:                           |
| 5589   | PRKCSH   | protein kinase C substrate 80K-H                                       | 0.35   | ACCTGTGACCTCAATCAATA   | NM_002743: | NM_001001329:NM_002743:              |
| 5589   | PRKCSH   | protein kinase C substrate 80K-H                                       | -1.86  | CTGCACCAACTGCGCTATAA   | NM_002743: | NM_001001329:NM_002743:              |
| 5590   | PRKCZ    | protein kinase C, zeta                                                 | -0.10  | CGGAAGCATGACAGCATTTAAA | NM_002744: | NM_001033582:NM_002744:NM_001033581: |
| 5590   | PRKCZ    | protein kinase C, zeta                                                 | 0.79   | GACCAAAATTCAGCCATGAAA  | NM_002744: | NM_001033582:NM_002744:NM_001033581: |
| 5587   | PRKD1    | protein kinase D1                                                      | 0.03   | CAGGAAGCGGATCTTATTGAA  | NM_002742: | NM_002742:                           |
| 5587   | PRKD1    | protein kinase D1                                                      | 0.01   | CCTCAGTATATTTAACTCAA   | NM_002742: | NM_002742:                           |
| 25865  | PRKD2    | protein kinase D2                                                      | -5.93  | CACGACCAACAGATACTATAA  | NM_016457: | NM_016457:                           |
| 25865  | PRKD2    | protein kinase D2                                                      | -0.44  | TTGGTGGTTCATACAGCAA    | NM_016457: | NM_016457:                           |
| 23683  | PRKD3    | protein kinase D3                                                      | -1.32  | CACGATATGTGACTGCTCAA   | NM_005813: | NM_005813:                           |
| 23683  | PRKD3    | protein kinase D3                                                      | -2.52  | CGGAGAGTGTACCATTGAA    | NM_005813: | NM_005813:                           |
| 5591   | PRKDC    | protein kinase, DNA-activated, catalytic polypeptide                   | 0.49   | CTCGTGTATTACAGAAGGAAA  | NM_006904: | NM_006904:                           |
| 5591   | PRKDC    | protein kinase, DNA-activated, catalytic polypeptide                   | 1.21   | GACCTGTGACAGTACTTTAA   | NM_006904: | NM_006904:                           |
| 5592   | PRKG1    | protein kinase, cGMP-dependent, type I                                 | 0.21   | CGGTGTATATACCATACAAA   | NM_006258: | NM_006258:                           |
| 5592   | PRKG1    | protein kinase, cGMP-dependent, type I                                 | 0.21   | GAGGTTCTGTTGAAGTCTTA   | NM_006258: | NM_006258:                           |
| 5593   | PRKG2    | protein kinase, cGMP-dependent, type II                                | 0.80   | GACCTACAATTTGATTTCAA   | NM_006259: | NM_006259:                           |
| 5593   | PRKG2    | protein kinase, cGMP-dependent, type II                                | 0.94   | TTGAGTACTACTAACGTTAA   | NM_006259: | NM_006259:                           |
| 8575   | PRKRA    | protein kinase, interferon-inducible double stranded RNA dependent a   | 0.89   | ATGATTGATGTTAAATTTCA   | NM_003690: | NM_003690:                           |
| 8575   | PRKRA    | protein kinase, interferon-inducible double stranded RNA dependent a   | 0.69   | TAAGTATGATTGATTGTTAA   | NM_003690: | NM_003690:                           |
| 5612   | PRKRIR   | protein-kinase, interferon-inducible double stranded RNA dependent i   | 0.23   | AAGGTGATGTAGACCCTTAA   | NM_004705: | NM_004705:                           |

|        |         |                                                                       |       |                        |            |            |
|--------|---------|-----------------------------------------------------------------------|-------|------------------------|------------|------------|
| 5612   | PRKRIR  | protein-kinase, interferon-inducible double stranded RNA dependent i  | -0.52 | CTGGACAGTTACAGAAATTA   | NM_004705: | NM_004705: |
| 5613   | PRKX    | protein kinase, X-linked                                              | -0.88 | CGGATGGGATTCACTTAAGAA  | NM_005044: | NM_005044: |
| 5613   | PRKX    | protein kinase, X-linked                                              | 0.56  | TTGGAATACTTAAGAGAAATA  | NM_005044: | NM_005044: |
| 5616   | PRKY    | protein kinase, Y-linked                                              | 0.23  | CCAGAGTTCCGCTACAGATAA  | NM_002760: | NM_002760: |
| 5616   | PRKY    | protein kinase, Y-linked                                              | 1.60  | TTGGATACAGTAAGAGAAATA  | NM_002760: | NM_002760: |
| 5617   | PRL     | prolactin                                                             | 0.00  | CCGGAGGCTATCTATCCAA    | NM_000948: | NM_000948: |
| 5617   | PRL     | prolactin                                                             | -4.15 | CAGCATATTCGGATCCTGGAA  | NM_000948: | NM_000948: |
| 2834   | PRLHR   | prolactin releasing hormone receptor                                  | 0.09  | CACCTATCAGTGGAGCTCAA   | NM_004248: | NM_004248: |
| 2834   | PRLHR   | prolactin releasing hormone receptor                                  | -0.76 | CGCCATGAGTTCCGGCTGCTA  | NM_004248: | NM_004248: |
| 5618   | PRLR    | prolactin receptor                                                    | 0.30  | CGGGGACTCCTGAGAACATA   | NM_000949: | NM_000949: |
| 5618   | PRLR    | prolactin receptor                                                    | 0.80  | CTCCTGTATGAAATTCGATTA  | NM_000949: | NM_000949: |
| 3275   | PRMT2   | protein arginine methyltransferase 2                                  | 0.26  | ACCGTCAAATTTCTGATCTA   | NM_001535: | NM_001535: |
| 3275   | PRMT2   | protein arginine methyltransferase 2                                  | -0.21 | AACGGGATGAGAAATGGAAA   | NM_001535: | NM_001535: |
| 10196  | PRMT3   | protein arginine methyltransferase 3                                  | 0.16  | CAGATTATGTCGAAAGGTTA   | NM_005788: | NM_005788: |
| 10196  | PRMT3   | protein arginine methyltransferase 3                                  | -0.35 | TTGGAGTTGATCAATCTGA    | NM_005788: | NM_005788: |
| 55170  | PRMT6   | protein arginine methyltransferase 6                                  | 1.45  | ATAGCCTAACATTTATTGTAA  | NM_018137: | NM_018137: |
| 55170  | PRMT6   | protein arginine methyltransferase 6                                  | -0.08 | CACACCTTATCTAAGCTGAA   | NM_018137: | NM_018137: |
| 54496  | PRMT7   | protein arginine methyltransferase 7                                  | 0.87  | ACGGCCGGAATTTAACA      | NM_019023: | NM_019023: |
| 54496  | PRMT7   | protein arginine methyltransferase 7                                  | 0.74  | AACGGCCGGAATTTAACA     | NM_019023: | NM_019023: |
| 56341  | PRMT8   | protein arginine methyltransferase 8                                  | -0.41 | CAGATGTTAAGCAGCTATGAA  | NM_019854: | NM_019854: |
| 56341  | PRMT8   | protein arginine methyltransferase 8                                  | 1.30  | CGCGTGTGCTAGAAATATA    | NM_019854: | NM_019854: |
| 23627  | PRND    | prion protein 2 (dublet)                                              | 0.92  | CACAATATGAGTAATGTTTAA  | NM_012409: | NM_012409: |
| 23627  | PRND    | prion protein 2 (dublet)                                              | 0.34  | CCAGGAGTGTGTAACATA     | NM_012409: | NM_012409: |
| 5624   | PROC    | protein C (inactivator of coagulation factors Va and VIIIa)           | 0.45  | TGCCTTATGAATGAATCTTA   | NM_000312: | NM_000312: |
| 5624   | PROC    | protein C (inactivator of coagulation factors Va and VIIIa)           | 0.07  | CAGCAAGAGCACCACCGACAA  | NM_000312: | NM_000312: |
| 147011 | PROCA1  | proline-rich cyclin A1-interacting protein                            | 0.98  | CAGGGTGGTCAGGGTGCAGAA  | NM_152465: | NM_152465: |
| 147011 | PROCA1  | proline-rich cyclin A1-interacting protein                            | 0.08  | CAGACGTGAGCCGATCATTAA  | NM_152465: | NM_152465: |
| 10544  | PROCR   | protein C receptor, endothelial (EPCR)                                | 0.03  | CAGGTGACGCGGATGTTAAT   | NM_006404: | NM_006404: |
| 10544  | PROCR   | protein C receptor, endothelial (EPCR)                                | 0.21  | TTGGATGGGACGCTGATATA   | NM_006404: | NM_006404: |
| 5625   | PRODH   | proline dehydrogenase (oxidase) 1                                     | -1.47 | CTGCTGATGTTTCCAGGAAA   | NM_016335: | NM_016335: |
| 5625   | PRODH   | proline dehydrogenase (oxidase) 1                                     | 0.69  | AGGAATATAGGGCACACTTA   | NM_016335: | NM_016335: |
| 84432  | PROK1   | prokineticin 1                                                        | -3.40 | CGCTGCTCCATGGACTTGA    | NM_032414: | NM_032414: |
| 84432  | PROK1   | prokineticin 1                                                        | 0.01  | CTCCATGGACTTGAAGAACAT  | NM_032414: | NM_032414: |
| 60675  | PROK2   | prokineticin 2                                                        | 1.11  | CGGTATTAAGTTGTAATTTAA  | NM_021935: | NM_021935: |
| 60675  | PROK2   | prokineticin 2                                                        | 1.17  | TAGCCACATCTACCTGTAAA   | NM_021935: | NM_021935: |
| 10887  | PROKR1  | prokineticin receptor 1                                               | 1.10  | CAGGACGTTCTTTGCTGCCAA  | NM_138964: | NM_138964: |
| 10887  | PROKR1  | prokineticin receptor 1                                               | -0.88 | CGCTACAAGAACTGCGCAA    | NM_138964: | NM_138964: |
| 128674 | PROKR2  | prokineticin receptor 2                                               | -1.50 | CGGACCTCTCTGCGACGCCAA  | NM_144773: | NM_144773: |
| 128674 | PROKR2  | prokineticin receptor 2                                               | -0.10 | TGGGTTACTTTGCAACAGAA   | NM_144773: | NM_144773: |
| 8842   | PROM1   | prominin 1                                                            | -0.17 | ACCTTTGAGTTTGGCCCTAA   | NM_006017: | NM_006017: |
| 8842   | PROM1   | prominin 1                                                            | 0.07  | CACGTTATAGTCCATGGTCCA  | NM_006017: | NM_006017: |
| 5626   | PROP1   | (prop) prophet of Pit1, paired-like homeodomain transcription factor  | 0.95  | CTACCAGTTAGAAATTTAA    | NM_006261: | NM_006261: |
| 5626   | PROP1   | (prop) prophet of Pit1, paired-like homeodomain transcription factor  | 0.92  | CCGACAGACTAAGCAACGGAA  | NM_006261: | NM_006261: |
| 5627   | PROS1   | protein S (alpha)                                                     | -1.09 | ATGGAGGTCCTAATGCCTTA   | NM_000313: | NM_000313: |
| 5627   | PROS1   | protein S (alpha)                                                     | 0.44  | ATGGTGGCTATTAATAATGA   | NM_000313: | NM_000313: |
| 8858   | PROZ    | protein Z, vitamin K-dependent plasma glycoprotein                    | 1.36  | CATGAGATACGTTAAATAATA  | NM_003891: | NM_003891: |
| 8858   | PROZ    | protein Z, vitamin K-dependent plasma glycoprotein                    | 0.75  | ACAGATCATGAACATACTGAA  | NM_003891: | NM_003891: |
| 134285 | PRP2    | proline-rich protein PRP2                                             | -1.35 | CAGGACAGACACGCTCAGCAA  | NM_173490: | NM_173490: |
| 134285 | PRP2    | proline-rich protein PRP2                                             | 0.50  | GAGACTGGAATCTATATATA   | NM_173490: | NM_173490: |
| 27339  | PRPF19  | PRP19/PSO4 pre-mRNA processing factor 19 homolog (S. cerevisiae)      | -2.93 | CACGCCAAGTTTCATCGCTTCA | NM_014502: | NM_014502: |
| 27339  | PRPF19  | PRP19/PSO4 pre-mRNA processing factor 19 homolog (S. cerevisiae)      | -5.55 | CAGATCTACATCTGCAACA    | NM_014502: | NM_014502: |
| 26121  | PRPF31  | PRP31 pre-mRNA processing factor 31 homolog (yeast)                   | -0.31 | CGGATAAGTACTCAAGAGAA   | NM_015629: | NM_015629: |
| 26121  | PRPF31  | PRP31 pre-mRNA processing factor 31 homolog (yeast)                   | -0.79 | CGAGCTGAACATCATCCATA   | NM_015629: | NM_015629: |
| 8899   | PRPF4B  | PRP4 pre-mRNA processing factor 4 homolog B (yeast)                   | -0.18 | GAGCCGATCTGCAAGAGAAA   | NM_003913: | NM_003913: |
| 8899   | PRPF4B  | PRP4 pre-mRNA processing factor 4 homolog B (yeast)                   | 0.21  | TGCTGTGATGATAACCTTGA   | NM_003913: | NM_003913: |
| 10594  | PRPF8   | PRP8 pre-mRNA processing factor 8 homolog (yeast)                     | -6.72 | ATGGCTTGTCTACCTGAATA   | NM_006445: | NM_006445: |
| 10594  | PRPF8   | PRP8 pre-mRNA processing factor 8 homolog (yeast)                     | -5.90 | CGAAAGTCATATAAGATGAA   | NM_006445: | NM_006445: |
| 5631   | PRPS1   | phosphoribosyl pyrophosphate synthetase 1                             | -0.03 | TTGATTAATTAAGATTTAA    | NM_002764: | NM_002764: |
| 5631   | PRPS1   | phosphoribosyl pyrophosphate synthetase 1                             | -1.86 | AACATGCTTCTGCTATGTTAA  | NM_002764: | NM_002764: |
| 221823 | PRPS1L1 | phosphoribosyl pyrophosphate synthetase 1-like 1                      | 0.81  | AACAGAATAACTTCTAGGTTA  | NM_175886: | NM_175886: |
| 221823 | PRPS1L1 | phosphoribosyl pyrophosphate synthetase 1-like 1                      | -7.90 | CCAGCCATTTTCTCGCATCAA  | NM_175886: | NM_175886: |
| 5634   | PRPS2   | phosphoribosyl pyrophosphate synthetase 2                             | -0.12 | TCAGCTAAGATTAATTTAA    | NM_002765: | NM_002765: |
| 5634   | PRPS2   | phosphoribosyl pyrophosphate synthetase 2                             | -2.63 | TAGACATATCAGAGCAGTGA   | NM_002765: | NM_002765: |
| 5636   | PRPSAP2 | phosphoribosyl pyrophosphate synthetase-associated protein 2          | 0.95  | CTGGTCAACTCATCTTATTA   | NM_002767: | NM_002767: |
| 5636   | PRPSAP2 | phosphoribosyl pyrophosphate synthetase-associated protein 2          | 0.21  | AAGAGCATCATTTGGCGTGATA | NM_002767: | NM_002767: |
| 5644   | PRSS1   | protease, serine, 1 (trypsin 1)                                       | -1.56 | CAGGAGACTCTGAACAATGA   | NM_002769: | NM_002769: |
| 5644   | PRSS1   | protease, serine, 1 (trypsin 1)                                       | 1.12  | CTGAACAATGACATCATGTTA  | NM_002769: | NM_002769: |
| 8492   | PRSS12  | protease, serine, 12 (neurotrypsin, motopsin)                         | -0.29 | CTCAGTGTAGTGGAAATGATA  | NM_003619: | NM_003619: |
| 8492   | PRSS12  | protease, serine, 12 (neurotrypsin, motopsin)                         | -0.06 | AAGCGGATCATTGGTGGAAA   | NM_003619: | NM_003619: |
| 9361   | PRSS15  | protease, serine, 15                                                  | 0.11  | TAGAAGCTATTAATGATTAA   | NM_004793: | NM_004793: |
| 9361   | PRSS15  | protease, serine, 15                                                  | -1.44 | CGGGGACATCATTGCCTTGAA  | NM_004793: | NM_004793: |
| 10279  | PRSS16  | protease, serine, 16 (thymus)                                         | 0.18  | CTGTTCTTCTCAAAGATCAA   | NM_005865: | NM_005865: |
| 10279  | PRSS16  | protease, serine, 16 (thymus)                                         | -1.03 | CAGAGAGTTATGGAATATATA  | NM_005865: | NM_005865: |
| 5645   | PRSS2   | protease, serine, 2 (trypsin 2)                                       | -3.32 | CAGCCGACTCTGGACAATGA   | NM_002770: | NM_002770: |
| 10942  | PRSS21  | protease, serine, 21 (testisin)                                       | -2.95 | CCACTTTGAGTGGATCCAGAA  | NM_006799: | NM_006799: |
| 10942  | PRSS21  | protease, serine, 21 (testisin)                                       | -1.76 | ACCCCTGGCCTGTAACAAGAA  | NM_006799: | NM_006799: |
| 64063  | PRSS22  | protease, serine, 22                                                  | 1.67  | CCAAATTCATCAATTAATTTA  | NM_022119: | NM_022119: |
| 64063  | PRSS22  | protease, serine, 22                                                  | 2.11  | TCCTCAATTTCAATAAATTA   | NM_022119: | NM_022119: |
| 11098  | PRSS23  | protease, serine, 23                                                  | 0.89  | CTGCATTGAGCAATTTGTAA   | NM_007173: | NM_007173: |
| 11098  | PRSS23  | protease, serine, 23                                                  | 1.10  | AACAGTTTGGCCACACTAAA   | NM_007173: | NM_007173: |
| 83886  | PRSS27  | protease, serine 27                                                   | -2.29 | AAGTCCCTTCCAAATTAACA   | NM_031948: | NM_031948: |
| 83886  | PRSS27  | protease, serine 27                                                   | 0.14  | AACCCAAAACATCAAGAATG   | NM_031948: | NM_031948: |
| 5646   | PRSS3   | protease, serine, 3 (mesotrypsin)                                     | -1.20 | CAGGGACACTCTGGACAATGA  | NM_002771: | NM_002771: |
| 5646   | PRSS3   | protease, serine, 3 (mesotrypsin)                                     | 1.21  | CTGGGAGACACAACATCAAA   | NM_002771: | NM_002771: |
| 260429 | PRSS33  | protease, serine, 33                                                  | -0.12 | TACAAGTTTGTGACTTAATA   | NM_152891: | NM_152891: |
| 260429 | PRSS33  | protease, serine, 33                                                  | -1.09 | ACGCAGTGTGGGCAACCCAA   | NM_152891: | NM_152891: |
| 167681 | PRSS35  | protease, serine, 35                                                  | -3.71 | CGTAGTGAGATCACTTCATA   | NM_153362: | NM_153362: |
| 167681 | PRSS35  | protease, serine, 35                                                  | 0.46  | TACGGCTAACAGAGACCTGAA  | NM_153362: | NM_153362: |
| 146547 | PRSS36  | protease, serine, 36                                                  | -5.66 | CCAGCCGGCTGGAACCTCAA   | NM_173502: | NM_173502: |
| 146547 | PRSS36  | protease, serine, 36                                                  | -0.62 | CTCGTGGGCTGGCTGTTCAA   | NM_173502: | NM_173502: |
| 5651   | PRSS7   | protease, serine, 7 (enterokinase)                                    | -0.22 | TAGCGCATTTCTTAAACTAAA  | NM_002772: | NM_002772: |
| 5651   | PRSS7   | protease, serine, 7 (enterokinase)                                    | 1.83  | TACGAATTTCCAAACAGCTA   | NM_002772: | NM_002772: |
| 5652   | PRSS8   | protease, serine, 8 (proctasin)                                       | -0.15 | AAGCAAGGTGACAGAACTCCA  | NM_002773: | NM_002773: |
| 5652   | PRSS8   | protease, serine, 8 (proctasin)                                       | -6.30 | ACCCATCACCCTTCCCGCTA   | NM_002773: | NM_002773: |
| 56952  | PRTFDC1 | phosphoribosyl transferase domain containing 1                        | -2.13 | CTCGAAACTAAGCAAGTATA   | NM_020200: | NM_020200: |
| 56952  | PRTFDC1 | phosphoribosyl transferase domain containing 1                        | -1.37 | CGGGAAATGACGCTATTAATA  | NM_020200: | NM_020200: |
| 5657   | PRTN3   | proteinase 3 (serine proteinase, neutrophil, Wegener granulomatosis i | 2.19  | TCAGGTGTTTCTGAACAACATA | NM_002777: | NM_002777: |
| 5657   | PRTN3   | proteinase 3 (serine proteinase, neutrophil, Wegener granulomatosis i | 0.76  | GAGCGGACTTTTGGACAGAA   | NM_002777: | NM_002777: |
| 57716  | PRX     | perixin                                                               | -1.28 | CCCGCGTGGAAATGAGGAA    | NM_020956: | NM_020956: |

|        |              |                                                                      |        |                         |            |                                          |
|--------|--------------|----------------------------------------------------------------------|--------|-------------------------|------------|------------------------------------------|
| 57716  | PRX          | periaxin                                                             | -1.69  | AGGGATGGAATTTGGCTTCAA   | NM_020956: | NM_020956:NM_181882:                     |
| 5660   | PSAP         | prosaposin (variant Gaucher disease and variant metachromatic leuko  | -4.43  | CTGCCGTAAGTGAACCTGCTA   | NM_002778: | NM_002778:                               |
| 5660   | PSAP         | prosaposin (variant Gaucher disease and variant metachromatic leuko  | -0.05  | CAAGCTGATGAGCAACAACAA   | NM_002778: | NM_002778:                               |
| 9266   | PSCD2        | pleckstrin homology, Sec7 and coiled-coil domains 2 (cytohesin-2)    | 1.37   | ACCGAAGCTGTTTGAACCTTTA  | NM_004228: | NM_017457:NM_004228:                     |
| 9266   | PSCD2        | pleckstrin homology, Sec7 and coiled-coil domains 2 (cytohesin-2)    | -0.41  | CTCACTGTTCTTTGAATTTAA   | NM_004228: | NM_017457:NM_004228:                     |
| 9265   | PSCD3        | pleckstrin homology, Sec7 and coiled-coil domains 3                  | 0.34   | AAGCCITTAAGCGAGTCTTAT   | NM_004227: | NM_004227:                               |
| 9265   | PSCD3        | pleckstrin homology, Sec7 and coiled-coil domains 3                  | 0.04   | AAGGAGTCGCCAGATGATCAA   | NM_004227: | NM_004227:                               |
| 5663   | PSEN1        | presenilin 1 (Alzheimer disease 3)                                   | -4.48  | CAGCTCTATTACTCCTCAA     | NM_000021: | NM_007318:NM_000021:NM_007319:           |
| 5663   | PSEN1        | presenilin 1 (Alzheimer disease 3)                                   | 0.05   | CAGGCATATCTCATTATGATT   | NM_000021: | NM_007318:NM_000021:NM_007319:           |
| 5664   | PSEN2        | presenilin 2 (Alzheimer disease 4)                                   | -3.59  | AAGCAAGCTATTGGAGCTGAA   | NM_000447: | NM_012486:NM_000447:                     |
| 5664   | PSEN2        | presenilin 2 (Alzheimer disease 4)                                   | -3.98  | CAGGAGAGAAATGAGCCATA    | NM_000447: | NM_012486:NM_000447:                     |
| 55851  | PSENE1       | presenilin enhancer 2 homolog (C. elegans)                           | 1.42   | CACAGAACAAGAGCCAAATCAA  | NM_172341: | NM_172341:                               |
| 55851  | PSENE1       | presenilin enhancer 2 homolog (C. elegans)                           | -4.74  | CTCGCCCAAGAAGACTACAA    | NM_172341: | NM_172341:                               |
| 5681   | PSKH1 (prote | protein serine kinase H1                                             | -5.31  | CCCGATTAGGCTCGAGTGCTA   | NM_006742: | NM_006742:                               |
| 5681   | PSKH1 (prote | protein serine kinase H1                                             | -1.12  | CCGCTCCACACGCTCCAATAA   | NM_006742: | NM_006742:                               |
| 85481  | PSKH2 (prote | protein serine kinase H2                                             | -0.56  | AAGGACTTTATAGCAAACATA   | NM_033126: | NM_033126:                               |
| 85481  | PSKH2 (prote | protein serine kinase H2                                             | -0.26  | GAGGATCAAGTTTACATGGTA   | NM_033126: | NM_033126:                               |
| 5682   | PSMA1        | proteasome (prosome, macropain) subunit, alpha type, 1               | -3.38  | ATGGAGTGTAAATTTAATGAA   | NM_002786: | NM_148976:NM_002786:                     |
| 5682   | PSMA1        | proteasome (prosome, macropain) subunit, alpha type, 1               | -8.30  | CACAGTTGGTCTGAAATCAAA   | NM_002786: | NM_148976:NM_002786:                     |
| 5683   | PSMA2        | proteasome (prosome, macropain) subunit, alpha type, 2               | 2.14   | GAGATACATTATGTAATAATA   | NM_002787: | NM_002787:                               |
| 5683   | PSMA2        | proteasome (prosome, macropain) subunit, alpha type, 2               | -4.58  | AAGGATTACTTGGCTGCCATA   | NM_002787: | NM_002787:                               |
| 5684   | PSMA3        | proteasome (prosome, macropain) subunit, alpha type, 3               | -10.36 | CCAGTCCAATGTAACATATTTA  | NM_002788: | NM_152132:NM_002788:                     |
| 5684   | PSMA3        | proteasome (prosome, macropain) subunit, alpha type, 3               | -2.72  | TCAGATGATGATAATATGTAA   | NM_002788: | NM_152132:NM_002788:                     |
| 5685   | PSMA4        | proteasome (prosome, macropain) subunit, alpha type, 4               | -6.00  | AACGATGATGTTACCCCTTCA   | NM_002789: | NM_002789:                               |
| 5685   | PSMA4        | proteasome (prosome, macropain) subunit, alpha type, 4               | -5.51  | ACAGGCTGTGTGATATCAAA    | NM_002789: | NM_002789:                               |
| 5686   | PSMA5        | proteasome (prosome, macropain) subunit, alpha type, 5               | -0.81  | AAGAAGTTTACCACAAGTCTA   | NM_002790: | NM_002790:                               |
| 5686   | PSMA5        | proteasome (prosome, macropain) subunit, alpha type, 5               | 0.19   | ATGTAAGACTTTAATGTATA    | NM_002790: | NM_002790:                               |
| 5687   | PSMA6        | proteasome (prosome, macropain) subunit, alpha type, 6               | -1.74  | CCAGGATGTTGTTTAAAGTA    | NM_002791: | NM_002791:                               |
| 5687   | PSMA6        | proteasome (prosome, macropain) subunit, alpha type, 6               | -10.09 | ACCGAAGTGGTTAGGACTCTA   | NM_002791: | NM_002791:                               |
| 5688   | PSMA7        | proteasome (prosome, macropain) subunit, alpha type, 7               | -2.45  | CACACTGAGTCTCTACAATA    | NM_002792: | NM_152255:NM_002792:                     |
| 5688   | PSMA7        | proteasome (prosome, macropain) subunit, alpha type, 7               | -0.54  | ATGATGAGTCTCGATGTGTA    | NM_002792: | NM_152255:NM_002792:                     |
| 143471 | PSMA8        | proteasome (prosome, macropain) subunit, alpha type, 8               | 0.31   | ACGGAAAGGATTTAATCCAAA   | NM_144662: | NM_001025096:NM_001025097:NM_144662:     |
| 143471 | PSMA8        | proteasome (prosome, macropain) subunit, alpha type, 8               | -2.48  | AGCTTCAAGTTAGCAATAATA   | NM_144662: | NM_001025096:NM_001025097:NM_144662:     |
| 5699   | PSMB10       | proteasome (prosome, macropain) subunit, beta type, 10               | -2.24  | CTGGGAGAAGATCCACTTCA    | NM_002801: | NM_002801:                               |
| 5699   | PSMB10       | proteasome (prosome, macropain) subunit, beta type, 10               | -2.31  | CACACGGATGGTGGCTGCCAA   | NM_002801: | NM_002801:                               |
| 5690   | PSMB2        | proteasome (prosome, macropain) subunit, beta type, 2                | 1.39   | GTGACTATGGATAAATTTGAA   | NM_002794: | NM_002794:                               |
| 5690   | PSMB2        | proteasome (prosome, macropain) subunit, beta type, 2                | -1.45  | CAGCAATATTGTCCAGATGAA   | NM_002794: | NM_002794:                               |
| 5691   | PSMB3        | proteasome (prosome, macropain) subunit, beta type, 3                | -2.49  | AACGGTTGGCCCTTACTACA    | NM_002795: | NM_002795:                               |
| 5691   | PSMB3        | proteasome (prosome, macropain) subunit, beta type, 3                | 0.00   | AAGGAAGTGGCGCAGATCAAA   | NM_002795: | NM_002795:                               |
| 5692   | PSMB4        | proteasome (prosome, macropain) subunit, beta type, 4                | -3.42  | CACATGATCAGTGGCTTTGAA   | NM_002796: | NM_002796:                               |
| 5692   | PSMB4        | proteasome (prosome, macropain) subunit, beta type, 4                | 0.56   | ACCATTGTCTACAGAGACCAA   | NM_002796: | NM_002796:                               |
| 5694   | PSMB6        | proteasome (prosome, macropain) subunit, beta type, 6                | -4.85  | CTCCGGAGCTCTACATCTA     | NM_002798: | NM_002798:                               |
| 5694   | PSMB6        | proteasome (prosome, macropain) subunit, beta type, 6                | 0.08   | CTGGGATTTAGTATGCAATA    | NM_002798: | NM_002798:                               |
| 5695   | PSMB7        | proteasome (prosome, macropain) subunit, beta type, 7                | -3.46  | CCGCCATACACAGTGCCCAA    | NM_002799: | NM_002799:                               |
| 5695   | PSMB7        | proteasome (prosome, macropain) subunit, beta type, 7                | 0.03   | CTGGTCTACAGCAAGAACAA    | NM_002799: | NM_002799:                               |
| 5696   | PSMB8        | proteasome (prosome, macropain) subunit, beta type, 8 (large multifu | 1.72   | CAGGGACCTAAGCCACGTAA    | NM_004159: | NM_004159:NM_148919:                     |
| 5696   | PSMB8        | proteasome (prosome, macropain) subunit, beta type, 8 (large multifu | -1.16  | CGGCCTAATCTTAGCCCTGAA   | NM_004159: | NM_004159:NM_148919:                     |
| 5698   | PSMB9        | proteasome (prosome, macropain) subunit, beta type, 9 (large multifu | 1.38   | CAGCACCTTTATCTATGGTTA   | NM_002800: | NM_002800:NM_148954:                     |
| 5698   | PSMB9        | proteasome (prosome, macropain) subunit, beta type, 9 (large multifu | -10.71 | AAGGAGTCCAGGTATATGGAA   | NM_002800: | NM_002800:NM_148954:                     |
| 5702   | PSMC3        | proteasome (prosome, macropain) 26S subunit, ATPase, 3               | -1.09  | ACGGTGAAGTGGCAATATAA    | NM_002804: | NM_002804:                               |
| 5702   | PSMC3        | proteasome (prosome, macropain) 26S subunit, ATPase, 3               | -1.57  | TAAGTAAATGCGCCACAAA     | NM_002804: | NM_002804:                               |
| 29893  | PSMC3IP      | PSMC3 interacting protein                                            | 0.26   | CAGAAGAATAATCCAGGATTA   | NM_013290: | NM_016556:NM_013290:                     |
| 29893  | PSMC3IP      | PSMC3 interacting protein                                            | -0.24  | CAGGATGTGTTCCGGGAACCTA  | NM_013290: | NM_016556:NM_013290:                     |
| 5704   | PSMC4        | proteasome (prosome, macropain) 26S subunit, ATPase, 4               | -7.11  | CAGAATGTCAATGTCGAAGTGA  | NM_006503: | NM_006503:NM_153001:                     |
| 5704   | PSMC4        | proteasome (prosome, macropain) 26S subunit, ATPase, 4               | -6.07  | CAGGATTTGGTCTTCAATAA    | NM_006503: | NM_006503:NM_153001:                     |
| 5705   | PSMC5        | proteasome (prosome, macropain) 26S subunit, ATPase, 5               | -6.14  | TTGGTCAAGTACATCTGCTGAA  | NM_002805: | NM_002805:                               |
| 5705   | PSMC5        | proteasome (prosome, macropain) 26S subunit, ATPase, 5               | -7.63  | AAGGTACATCTGGAAGGTAAA   | NM_002805: | NM_002805:                               |
| 10213  | PSMD14       | proteasome (prosome, macropain) 26S subunit, non-ATPase, 14          | -0.61  | TTGGTACTGCTGATTTTAAA    | NM_005805: | NM_005805:                               |
| 10213  | PSMD14       | proteasome (prosome, macropain) 26S subunit, non-ATPase, 14          | -4.16  | ACAGACATTATTACTCCATTA   | NM_005805: | NM_005805:                               |
| 5708   | PSMD2        | proteasome (prosome, macropain) 26S subunit, non-ATPase, 2           | -5.10  | TGGGTGTGTTCCGAAAGTTTA   | NM_002808: | NM_002808:                               |
| 5708   | PSMD2        | proteasome (prosome, macropain) 26S subunit, non-ATPase, 2           | -0.17  | CTCCGGAGGGCTGACCTTTTA   | NM_002808: | NM_002808:                               |
| 5713   | PSMD7        | proteasome (prosome, macropain) 26S subunit, non-ATPase, 7 (MovC     | -0.95  | TACCTTCAAGATACAAATTA    | NM_002811: | NM_002811:                               |
| 5713   | PSMD7        | proteasome (prosome, macropain) 26S subunit, non-ATPase, 7 (MovC     | 0.28   | TTCCGTTATGGTCACTATTGA   | NM_002811: | NM_002811:                               |
| 5723   | PSPH         | phosphoserine phosphatase                                            | -1.67  | CCGGATAAGGGAGCTGGTAA    | NM_004577: | NM_004577:                               |
| 5723   | PSPH         | phosphoserine phosphatase                                            | 1.32   | TGCCAATAGGCTGAAATCTTA   | NM_004577: | NM_004577:                               |
| 9051   | PSTPIP1      | proline-serine-threonine phosphatase interacting protein 1           | 0.09   | ACGGGGCGCTACGATTTATA    | NM_003978: | NM_003978:                               |
| 9051   | PSTPIP1      | proline-serine-threonine phosphatase interacting protein 1           | 0.36   | CCGGTGACCATTCTCCGCCAA   | NM_003978: | NM_003978:                               |
| 9050   | PSTPIP2      | proline-serine-threonine phosphatase interacting protein 2           | 0.00   | CCACGTTATGTCAAGCAATGAA  | NM_024430: | NM_024430:                               |
| 9050   | PSTPIP2      | proline-serine-threonine phosphatase interacting protein 2           | -1.56  | CCGGTAGTGTCTCTGTGATA    | NM_024430: | NM_024430:                               |
| 5724   | PTAFR        | platelet-activating factor receptor                                  | -2.37  | ACCACGATACGGCTCACTGAA   | NM_000952: | NM_000952:                               |
| 5724   | PTAFR        | platelet-activating factor receptor                                  | 0.73   | CACGGTCTTGGCGGTGTTCAT   | NM_000952: | NM_000952:                               |
| 375743 | PTAR1        | protein prenyltransferase alpha subunit repeat containing 1          | -2.44  | CTGAAATGACTTAGCAAGCAA   | XM_372117: | XM_372117:                               |
| 375743 | PTAR1        | protein prenyltransferase alpha subunit repeat containing 1          | 1.21   | CACAGGTCATTGATCAAGTA    | XM_372117: | XM_372117:                               |
| 5725   | PTBP1        | polypyrimidine tract binding protein 1                               | 0.14   | CACGCACATTCGGTTGCCTTA   | NM_175847: | NM_175847:NM_031990:NM_002819:NM_031991: |
| 5725   | PTBP1        | polypyrimidine tract binding protein 1                               | 0.36   | ATGGTATGAGTGAATCTAAA    | NM_175847: | NM_175847:NM_031990:NM_002819:NM_031991: |
| 5727   | PTCH         | patched homolog (Drosophila)                                         | 1.33   | ACAGCATACCTCTAGGTAAA    | NM_000264: | NM_000264:                               |
| 5727   | PTCH         | patched homolog (Drosophila)                                         | -1.48  | TCCACAGAACTCCACTCAA     | NM_000264: | NM_000264:                               |
| 8643   | PTCH2 (patc  | l patched homolog 2 (Drosophila)                                     | -3.41  | CTGGCGATGATGACAGTGGAA   | NM_003738: | NM_003738:                               |
| 8643   | PTCH2 (patc  | l patched homolog 2 (Drosophila)                                     | -0.62  | CCGCACCTGGCTGCACATTA    | NM_003738: | NM_003738:                               |
| 139411 | PTCHD1       | patched domain containing 1                                          | 0.85   | TOCCGGTTTGAGAGCTATTTA   | NM_173495: | NM_173495:                               |
| 139411 | PTCHD1       | patched domain containing 1                                          | -1.04  | AAGGATTTCAAGAAGCTAAA    | NM_173495: | NM_173495:                               |
| 23210  | PTDSR        | phosphatidyserine receptor                                           | -1.11  | AAGGAAATATCGGAACCAAGAA  | NM_015167: | NM_015167:                               |
| 23210  | PTDSR        | phosphatidyserine receptor                                           | 0.00   | CTGCTTCTAAGGATGATTA     | NM_015167: | NM_015167:                               |
| 5728   | PTEN         | phosphatase and tensin homolog (mutated in multiple advanced cance   | 1.20   | AAGATTTAGATGCACTTATT    | NM_000314: | NM_000314:                               |
| 5728   | PTEN         | phosphatase and tensin homolog (mutated in multiple advanced cance   | 3.03   | CAATTTGAGATTCTACAGTAA   | NM_000314: | NM_000314:                               |
| 5729   | PTGDR        | prostaglandin D2 receptor (DP)                                       | -13.62 | CCAGTATCTGAGATAATATA    | NM_000953: | NM_000953:                               |
| 5729   | PTGDR        | prostaglandin D2 receptor (DP)                                       | 0.48   | CCGGTGAGCAATCCACTAA     | NM_000953: | NM_000953:                               |
| 5731   | PTGER1       | prostaglandin E receptor 1 (subtype EP1), 42kDa                      | 0.15   | AACCAGAGGCCCAACGACTAA   | NM_000955: | NM_000955:                               |
| 5731   | PTGER1       | prostaglandin E receptor 1 (subtype EP1), 42kDa                      | 1.18   | CTGACCCACTTCTAAGCACAA   | NM_000955: | NM_000955:                               |
| 5732   | PTGER2       | prostaglandin E receptor 2 (subtype EP2), 53kDa                      | -2.49  | TACTACCGTTATACACATATA   | NM_000956: | NM_000956:                               |
| 5732   | PTGER2       | prostaglandin E receptor 2 (subtype EP2), 53kDa                      | 0.52   | TCCGATTTCAATGAAGACACA   | NM_000956: | NM_000956:                               |
| 5733   | PTGER3       | prostaglandin E receptor 3 (subtype EP3)                             | 1.00   | AAGCATAATTTGTTGTACAA    | NM_000957: | NM_198713:NM_198712:NM_000957:NM_198714: |
| 5733   | PTGER3       | prostaglandin E receptor 3 (subtype EP3)                             | -0.06  | AAGGACCGATTGTAGGACACTAA | NM_000957: | NM_198713:NM_198712:NM_000957:NM_198714: |
| 5733   | PTGER3       | prostaglandin E receptor 3 (subtype EP3)                             | -1.13  | AAGCATAATTTGTTGTACAA    | NM_000957: | NM_198713:NM_198712:NM_000957:NM_198714: |

|        |        |                                                                                       |        |                        |            |                                          |
|--------|--------|---------------------------------------------------------------------------------------|--------|------------------------|------------|------------------------------------------|
| 5733   | PTGER3 | prostaglandin E receptor 3 (subtype EP3)                                              | 0.51   | CGGCTATAGAGTATTCCTATAA | NM_000957: | NM_198713:NM_198712:NM_000957:NM_198714: |
| 5734   | PTGER4 | prostaglandin E receptor 4 (subtype EP4)                                              | -0.36  | ACCCATAATTGAAGTGTATAA  | NM_000958: | NM_198717:NM_198716:                     |
| 5734   | PTGER4 | prostaglandin E receptor 4 (subtype EP4)                                              | 0.08   | AGGCTCTATTCCTAACTAACTA | NM_000958: | NM_000958:                               |
| 9536   | PTGES  | prostaglandin E synthase                                                              | 1.09   | TTGGGTGACCAGCCACTCAAAA | NM_004878: | NM_000958:                               |
| 9536   | PTGES  | prostaglandin E synthase                                                              | 0.15   | CGGGCTAAGAATCGACAGCTTT | NM_004878: | NM_004878:NM_198797:                     |
| 10728  | PTGES3 | prostaglandin E synthase 3 (cytosolic)                                                | -3.08  | CAGCTTAGGGAAGAGAATAA   | NM_006601: | NM_004878:NM_198797:                     |
| 10728  | PTGES3 | prostaglandin E synthase 3 (cytosolic)                                                | -0.03  | CAGATAGCTGTATTTGCCCTA  | NM_006601: | NM_006601:                               |
| 5737   | PTGFR  | prostaglandin F receptor (FP)                                                         | -1.37  | AACCCAAAGAGTAGACATCAA  | NM_000959: | NM_000959:                               |
| 5737   | PTGFR  | prostaglandin F receptor (FP)                                                         | -0.18  | ATGGGAGGTAGACACAATAAA  | NM_000959: | NM_000959:                               |
| 5739   | PTGIR  | prostaglandin I2 (prostacyclin) receptor (IP)                                         | -3.14  | CCCAGGCTCTGAAATAAATAA  | NM_000960: | NM_000960:                               |
| 5739   | PTGIR  | prostaglandin I2 (prostacyclin) receptor (IP)                                         | 0.06   | CCCATCCATCTCATTTGCTCAA | NM_000960: | NM_000960:                               |
| 5740   | PTGIS  | prostaglandin I2 (prostacyclin) synthase                                              | 1.16   | CTGTTTATTGAGACCCTTTAA  | NM_000961: | NM_000961:                               |
| 5740   | PTGIS  | prostaglandin I2 (prostacyclin) synthase                                              | 0.04   | GCGGTCAACGAGCATCAACAAA | NM_000961: | NM_000961:                               |
| 5742   | PTGS1  | prostaglandin-endoperoxide synthase 1 (prostaglandin G/H synthase & cyclooxygenase 1) | 0.86   | AACGATGAAATAAGATATATA  | M59979:    | NM_000963:                               |
| 5742   | PTGS1  | prostaglandin-endoperoxide synthase 1 (prostaglandin G/H synthase & cyclooxygenase 1) | -1.27  | CACGCCATTTGGTGGAGGCTA  | M59979:    | NM_000963:                               |
| 5743   | PTGS2  | prostaglandin-endoperoxide synthase 2 (prostaglandin G/H synthase & cyclooxygenase 2) | -1.35  | ACGCTTTATGCTGAAGCCCTA  | NM_000963: | NM_000963:                               |
| 5743   | PTGS2  | prostaglandin-endoperoxide synthase 2 (prostaglandin G/H synthase & cyclooxygenase 2) | -1.77  | CCCGAGTACAGAAAGTATCA   | NM_000963: | NM_000963:                               |
| 5741   | PTH    | parathyroid hormone                                                                   | 1.44   | ATGAAGTATTTCTCACTCAA   | NM_000315: | NM_000315:                               |
| 5741   | PTH    | parathyroid hormone                                                                   | 1.28   | AATGATTAACATAAAGCTAAA  | NM_000315: | NM_000315:                               |
| 5744   | PTHLH  | parathyroid hormone-like hormone                                                      | 0.52   | CTCCTAGACTTTGGGATCAAAA | NM_002820: | NM_002820:NM_198964:                     |
| 5744   | PTHLH  | parathyroid hormone-like hormone                                                      | 1.31   | CTAGGGTAATGCGTAGGAAA   | NM_002820: | NM_002820:NM_198964:                     |
| 5745   | PTHRI  | parathyroid hormone receptor 1                                                        | -0.36  | CAGCATAATGGAATCAGACAAA | NM_000316: | NM_000316:                               |
| 5745   | PTHRI  | parathyroid hormone receptor 1                                                        | -10.67 | CGCCGTGAGCATCTCGCTCAA  | NM_000316: | NM_000316:                               |
| 5746   | PTHRI2 | parathyroid hormone receptor 2                                                        | 0.57   | AAGGTGTACTTAATAATAGT   | NM_005048: | NM_005048:                               |
| 5746   | PTHRI2 | parathyroid hormone receptor 2                                                        | 1.34   | TGGCATGTGGGATCAATTA    | NM_005048: | NM_005048:                               |
| 5747   | PTK2   | PTK2 protein tyrosine kinase 2                                                        | -0.45  | AACAATTTATGTTACACTTAA  | NM_005607: | NM_153831:NM_005607:                     |
| 5747   | PTK2   | PTK2 protein tyrosine kinase 2                                                        | -0.96  | CACCTGGTACTGGTATGGAA   | NM_005607: | NM_153831:NM_005607:                     |
| 2185   | PTK2B  | PTK2B protein tyrosine kinase 2 beta                                                  | -1.66  | AAGCTGATCGGCATCATTGAA  | NM_173176: | NM_173174:NM_173176:NM_173175:NM_004103: |
| 2185   | PTK2B  | PTK2B protein tyrosine kinase 2 beta                                                  | 0.54   | CAGGAGAACCTAAAGCCCAAA  | NM_173176: | NM_173174:NM_173176:NM_173175:NM_004103: |
| 5753   | PTK6   | PTK6 protein tyrosine kinase 6                                                        | 0.28   | CGGGTCCAGGTGGCCATTAA   | NM_005975: | NM_005975:                               |
| 5753   | PTK6   | PTK6 protein tyrosine kinase 6                                                        | 0.04   | CGGGTTAGCCAGGCTTATCAA  | NM_005975: | NM_005975:                               |
| 5754   | PTK7   | PTK7 protein tyrosine kinase 7                                                        | -0.03  | ACGGTTCGAGGCTTCAAGAA   | NM_152883: | NM_152882:NM_152883:NM_152880:NM_002821: |
| 5754   | PTK7   | PTK7 protein tyrosine kinase 7                                                        | 0.03   | ATGGGACATGGTACCGTGTGA  | NM_152883: | NM_152882:NM_152883:NM_152880:NM_002821: |
| 5756   | PTK9   | PTK9 protein tyrosine kinase 9                                                        | 0.03   | ACGGCATCCAAAGCAAGTAAA  | NM_002822: | NM_002822:                               |
| 5756   | PTK9   | PTK9 protein tyrosine kinase 9                                                        | 1.14   | TCCAAAGCAAGTGAAGATGTTA | NM_002822: | NM_002822:                               |
| 11344  | PTK9L  | PTK9L protein tyrosine kinase 9-like (A6-related protein)                             | -1.58  | AAGACAGAGATCAGTGGGAAA  | NM_007284: | NM_007284:                               |
| 11344  | PTK9L  | PTK9L protein tyrosine kinase 9-like (A6-related protein)                             | -1.70  | TTGGATGGTGAATGCTGTA    | NM_007284: | NM_007284:                               |
| 5757   | PTMA   | prothymosin, alpha (gene sequence 28)                                                 | -0.43  | TTGATGTATGTGAAACAAT    | NM_002823: | NM_002823:                               |
| 5764   | PTN    | pleiotrophin (heparin binding growth factor 8, neurite growth-promoting factor 2)     | 1.01   | TACATGATAAATGATAGCAA   | NM_002825: | NM_002825:                               |
| 5764   | PTN    | pleiotrophin (heparin binding growth factor 8, neurite growth-promoting factor 2)     | -1.07  | TACCGTAGGCTTTGTATTCAA  | NM_002825: | NM_002825:                               |
| 53635  | PTOV1  | prostate tumor overexpressed gene 1                                                   | -6.59  | CTGGAGCAGGAGCAACAGCAA  | NM_017432: | NM_017432:                               |
| 53635  | PTOV1  | prostate tumor overexpressed gene 1                                                   | -7.57  | CGGGCTGTCATTGCCAACCA   | NM_017432: | NM_017432:                               |
| 7803   | PTP4A1 | protein tyrosine phosphatase type IVA, member 1                                       | 1.05   | ACGCCCTTAACACAGCTCTATA | NM_003463: | NM_003463:                               |
| 7803   | PTP4A1 | protein tyrosine phosphatase type IVA, member 1                                       | 0.56   | CCCTTTGATCAGCTTAATCTA  | NM_003463: | NM_003463:                               |
| 8073   | PTP4A2 | protein tyrosine phosphatase type IVA, member 2                                       | -0.80  | AACAGCATACCTGCTAAGCTA  | NM_003479: | NM_003479:                               |
| 8073   | PTP4A2 | protein tyrosine phosphatase type IVA, member 2                                       | 0.78   | CAGAGAATGCTGGTAGCTTAA  | NM_003479: | NM_003479:                               |
| 11156  | PTP4A3 | protein tyrosine phosphatase type IVA, member 3                                       | -0.93  | CACCCAAGTATTTGCAACAATA | NM_007079: | NM_007079:                               |
| 11156  | PTP4A3 | protein tyrosine phosphatase type IVA, member 3                                       | 0.03   | CGCGGAGCCATCAACAGCAA   | NM_007079: | NM_007079:                               |
| 138639 | PTPDC1 | protein tyrosine phosphatase domain containing 1                                      | 0.91   | CGGAATGTTGAGTGCCTTCAA  | NM_152422: | NM_152422:NM_177995:                     |
| 138639 | PTPDC1 | protein tyrosine phosphatase domain containing 1                                      | -0.01  | TACGTAGATACCAGAGCCCAA  | NM_152422: | NM_152422:NM_177995:                     |
| 9200   | PTPLA  | (prote) protein tyrosine phosphatase-like (proline instead of catalytic arginine)     | 1.52   | ACCCTTGCCATACTTCATTA   | NM_014241: | NM_014241:                               |
| 9200   | PTPLA  | (prote) protein tyrosine phosphatase-like (proline instead of catalytic arginine)     | 0.87   | CACCTTTAATTTGGAATTGTA  | NM_014241: | NM_014241:                               |
| 201562 | PTPLB  | (prote) protein tyrosine phosphatase-like (proline instead of catalytic arginine)     | -1.80  | CACGGCGTACCTGGTCATCTA  | NM_198402: | NM_198402:                               |
| 201562 | PTPLB  | (prote) protein tyrosine phosphatase-like (proline instead of catalytic arginine)     | -2.69  | CAGCCAAAGAAATGTTGGTA   | NM_198402: | NM_198402:                               |
| 5770   | PTPN1  | protein tyrosine phosphatase, non-receptor type 1                                     | 1.47   | CACGCTGATTTAATAAGAA    | NM_002827: | NM_002827:                               |
| 5770   | PTPN1  | protein tyrosine phosphatase, non-receptor type 1                                     | -4.51  | CAGGCATGCCGGGTAGGTA    | NM_002827: | NM_002827:                               |
| 5781   | PTPN11 | protein tyrosine phosphatase, non-receptor type 11 (Noonan syndrome)                  | -0.51  | CAGAAGCAGTACCGATTTA    | NM_002834: | NM_002834:                               |
| 5781   | PTPN11 | protein tyrosine phosphatase, non-receptor type 11 (Noonan syndrome)                  | -1.45  | CGCTCATGACTATACGCTAA   | NM_002834: | NM_002834:                               |
| 5782   | PTPN12 | protein tyrosine phosphatase, non-receptor type 12                                    | -0.07  | AAGCTTAATGAGGAAATATCA  | NM_002835: | NM_002835:                               |
| 5782   | PTPN12 | protein tyrosine phosphatase, non-receptor type 12                                    | -5.91  | TTGAGGTTATCAGAGATCAA   | NM_002835: | NM_002835:                               |
| 5783   | PTPN13 | protein tyrosine phosphatase, non-receptor type 13 (APO-1/CD95 (Fas))                 | 0.55   | CGGCTATTTCTACTAAGAAA   | NM_006264: | NM_00685:NM_00684:NM_00683:NM_006264:    |
| 5783   | PTPN13 | protein tyrosine phosphatase, non-receptor type 13 (APO-1/CD95 (Fas))                 | -0.72  | TCCAGGTACATTAAGATGAA   | NM_006264: | NM_00685:NM_00684:NM_00683:NM_006264:    |
| 5784   | PTPN14 | protein tyrosine phosphatase, non-receptor type 14                                    | -0.08  | AAGGGCGATTACGATGCAT    | NM_005401: | NM_005401:                               |
| 5784   | PTPN14 | protein tyrosine phosphatase, non-receptor type 14                                    | 0.18   | CGGTGTGGCATTTACAATATA  | NM_005401: | NM_005401:                               |
| 26469  | PTPN18 | protein tyrosine phosphatase, non-receptor type 18 (brain-derived)                    | 0.02   | CAGGCAGACATCAGTCCACAT  | NM_014369: | NM_014369:                               |
| 26469  | PTPN18 | protein tyrosine phosphatase, non-receptor type 18 (brain-derived)                    | 0.23   | CCCAATGACTGTAGATTCAA   | NM_014369: | NM_014369:                               |
| 5771   | PTPN2  | protein tyrosine phosphatase, non-receptor type 2                                     | 0.36   | AACTGTATTATCAGCTGCAA   | NM_002828: | NM_002828:                               |
| 5771   | PTPN2  | protein tyrosine phosphatase, non-receptor type 2                                     | -0.78  | CGCTGTACTTGGAAATCGA    | NM_002828: | NM_002828:NM_080422:NM_080423:           |
| 11099  | PTPN21 | protein tyrosine phosphatase, non-receptor type 21                                    | 0.06   | GAGGAGCACTTCAATTTCAA   | NM_007039: | NM_007039:                               |
| 11099  | PTPN21 | protein tyrosine phosphatase, non-receptor type 21                                    | -1.14  | GTGCATAGATTTCTATCTTAA  | NM_007039: | NM_007039:                               |
| 26191  | PTPN22 | protein tyrosine phosphatase, non-receptor type 22 (lymphoid)                         | 0.27   | CGGGCTGAGAAGTCCCTGAT   | NM_012411: | NM_012411:NM_015967:                     |
| 26191  | PTPN22 | protein tyrosine phosphatase, non-receptor type 22 (lymphoid)                         | -2.40  | TGGATGTACGTTGTACCAA    | NM_012411: | NM_012411:NM_015967:                     |
| 25930  | PTPN23 | protein tyrosine phosphatase, non-receptor type 23                                    | 0.51   | AACCTGTACAGTCCATGCAA   | NM_015466: | NM_015466:                               |
| 25930  | PTPN23 | protein tyrosine phosphatase, non-receptor type 23                                    | -0.04  | CGCCAGATCCTTACGCTCAA   | NM_015466: | NM_015466:                               |
| 5774   | PTPN3  | protein tyrosine phosphatase, non-receptor type 3                                     | 1.84   | CAGGTATTGAGGATGATTA    | NM_002829: | NM_002829:                               |
| 5774   | PTPN3  | protein tyrosine phosphatase, non-receptor type 3                                     | -0.23  | CGGGTATTATTGAGGAGAAA   | NM_002829: | NM_002829:                               |
| 5775   | PTPN4  | protein tyrosine phosphatase, non-receptor type 4 (megakaryocyte)                     | 1.89   | CTCCGAACAATAATGAAATAA  | NM_002830: | NM_002830:                               |
| 5775   | PTPN4  | protein tyrosine phosphatase, non-receptor type 4 (megakaryocyte)                     | 1.99   | TCCGCTCATCAACACAGCTAA  | NM_002830: | NM_002830:                               |
| 84867  | PTPN5  | protein tyrosine phosphatase, non-receptor type 5 (striatum-enriched)                 | 0.12   | ATCGAGGAGATGAACGAGAAA  | NM_032781: | NM_032781:                               |
| 84867  | PTPN5  | protein tyrosine phosphatase, non-receptor type 5 (striatum-enriched)                 | -5.84  | CACCAACATCGAGGAGATGAA  | NM_032781: | NM_032781:                               |
| 5777   | PTPN6  | protein tyrosine phosphatase, non-receptor type 6                                     | -2.36  | CGGGAAGAAATGCGTCCCTAA  | NM_002831: | NM_002831:                               |
| 5777   | PTPN6  | protein tyrosine phosphatase, non-receptor type 6                                     | 1.75   | TAGGCGCTGATGAGAAGCCTA  | NM_002831: | NM_002831:NM_080549:NM_080548:           |
| 5778   | PTPN7  | protein tyrosine phosphatase, non-receptor type 7                                     | -5.50  | CAGGTCTACCTCAGGACTGAA  | NM_002832: | NM_002832:NM_080588:NM_080589:NM_002832: |
| 5778   | PTPN7  | protein tyrosine phosphatase, non-receptor type 7                                     | -7.55  | TTGCAATTTATGACAGACAAA  | NM_002832: | NM_002832:NM_080588:NM_080589:NM_002832: |
| 5780   | PTPN9  | protein tyrosine phosphatase, non-receptor type 9                                     | 1.74   | ACCAAAGTACAGTGAAGCTAA  | NM_002833: | NM_002833:                               |
| 5780   | PTPN9  | protein tyrosine phosphatase, non-receptor type 9                                     | -0.08  | AGGAACGGAGGAAATAATA    | NM_002833: | NM_002833:                               |
| 140885 | PTPNS1 | protein tyrosine phosphatase, non-receptor type substrate 1                           | -1.59  | CGCCTGTAATTAAGTGAAGAA  | NM_080792: | NM_080792:                               |
| 140885 | PTPNS1 | protein tyrosine phosphatase, non-receptor type substrate 1                           | -1.27  | CTCGCTGGGACGCTGTA      | NM_080792: | NM_080792:                               |
| 5786   | PTPRA  | protein tyrosine phosphatase, receptor type, A                                        | 0.25   | CAGAGTATCAATCCAGTTAA   | NM_002836: | NM_002836:NM_002836:NM_080840:           |
| 5786   | PTPRA  | protein tyrosine phosphatase, receptor type, A                                        | -4.58  | CGGAGAAATGGCAGACGACAA  | NM_002836: | NM_002836:NM_002836:NM_080840:           |
| 5787   | PTPRB  | protein tyrosine phosphatase, receptor type, B                                        | -0.48  | CCGGAGATGTGGTAACACT    | NM_002837: | NM_002837:                               |
| 5787   | PTPRB  | protein tyrosine phosphatase, receptor type, B                                        | -0.23  | CGGTGCACTTATCAAGTTA    | NM_002837: | NM_002837:                               |

|        |                                                                                     |                                                                              |       |                         |               |                                          |
|--------|-------------------------------------------------------------------------------------|------------------------------------------------------------------------------|-------|-------------------------|---------------|------------------------------------------|
| 5788   | PTPRC                                                                               | protein tyrosine phosphatase, receptor type, C                               | 0.45  | AACGGTATGTTGACATTCCT    | NM_002838:    | NM_002838:NM_080921:NM_080922:           |
| 5788   | PTPRC                                                                               | protein tyrosine phosphatase, receptor type, C                               | -0.31 | AAGAATTGCGAATTCGGGTGA   | NM_002838:    | NM_002838:NM_080921:NM_080922:           |
| 5789   | PTPRD                                                                               | protein tyrosine phosphatase, receptor type, D                               | -1.91 | ACGGCCAGTCCCGAACAGTAA   | NM_002839:    | NM_130391:NM_130392:NM_002839:NM_130393: |
| 5789   | PTPRD                                                                               | protein tyrosine phosphatase, receptor type, D                               | -0.14 | CTGGGTGCTATTGAAGCAATA   | NM_002839:    | NM_130391:NM_130392:NM_002839:NM_130393: |
| 5791   | PTPRE                                                                               | protein tyrosine phosphatase, receptor type, E                               | 1.31  | ACCACGGGCAATTAACCTTTA   | NM_006504:    | NM_130435:NM_006504:                     |
| 5791   | PTPRE                                                                               | protein tyrosine phosphatase, receptor type, E                               | 0.72  | CGAGTGATCCTTTCCATGAA    | NM_006504:    | NM_130435:NM_006504:                     |
| 5792   | PTPRF                                                                               | protein tyrosine phosphatase, receptor type, F                               | 0.67  | CAGCGCTATCTAGATAGGTAA   | NM_002840:    | NM_130440:NM_002840:                     |
| 5792   | PTPRF                                                                               | protein tyrosine phosphatase, receptor type, F                               | -2.91 | CATCGTGTGGCAAGGTTAA     | NM_002840:    | NM_130440:NM_002840:                     |
| 5793   | PTPRG                                                                               | protein tyrosine phosphatase, receptor type, G                               | -1.69 | AGGGTGAAGTTAAGACCTTTA   | NM_002841:    | NM_002841:                               |
| 5793   | PTPRG                                                                               | protein tyrosine phosphatase, receptor type, G                               | 0.14  | TCGGTGAGCTTATCTTAATA    | NM_002841:    | NM_002841:                               |
| 5794   | PTPRH                                                                               | protein tyrosine phosphatase, receptor type, H                               | -2.80 | CGGGACGTTGTACAATTTC     | NM_002842:    | NM_002842:                               |
| 5794   | PTPRH                                                                               | protein tyrosine phosphatase, receptor type, H                               | 0.30  | CGGGTCATTGTATACGTGTT    | NM_002842:    | NM_002842:                               |
| 5795   | PTPRJ                                                                               | protein tyrosine phosphatase, receptor type, J                               | 0.09  | TCGGAGTATGTCTACCATTTA   | NM_002843:    | NM_002843:                               |
| 5795   | PTPRJ                                                                               | protein tyrosine phosphatase, receptor type, J                               | -1.20 | TCGGGTAGAATAACCCACAA    | NM_002843:    | NM_002843:                               |
| 5796   | PTPRK                                                                               | protein tyrosine phosphatase, receptor type, K                               | -0.09 | CGGGTTAAATGCTATAAATA    | NM_002844:    | NM_002844:                               |
| 5796   | PTPRK                                                                               | protein tyrosine phosphatase, receptor type, K                               | -2.12 | CTGGAGATTAGTGATGATTA    | NM_002844:    | NM_002844:                               |
| 5797   | PTPRM                                                                               | protein tyrosine phosphatase, receptor type, M                               | -1.07 | AAGGTCAAATGCTGCAAAATA   | NM_002845:    | NM_002845:                               |
| 5797   | PTPRM                                                                               | protein tyrosine phosphatase, receptor type, M                               | 0.10  | CACATCCGTAGTTATGCTAAA   | NM_002845:    | NM_002845:                               |
| 5798   | PTPRN                                                                               | protein tyrosine phosphatase, receptor type, N                               | -0.21 | CACCTTCACTGAGTTACGAA    | NM_002846:    | NM_002846:                               |
| 5798   | PTPRN                                                                               | protein tyrosine phosphatase, receptor type, N                               | 1.11  | CAGGTCTGGCTGGCACCCAA    | NM_002846:    | NM_002846:                               |
| 5799   | PTPRN2                                                                              | protein tyrosine phosphatase, receptor type, N polypeptide 2                 | -2.80 | AAGGTGCTAAGAGATTGATA    | NM_002847:    | NM_002847:NM_130843:NM_130842:           |
| 5799   | PTPRN2                                                                              | protein tyrosine phosphatase, receptor type, N polypeptide 2                 | 0.76  | CAGCGCAGTTTATGACAGTTAAA | NM_002847:    | NM_002847:NM_130843:NM_130842:           |
| 5801   | PTPRR                                                                               | protein tyrosine phosphatase, receptor type, R                               | -2.06 | CGCCACCAGATTGCTCAATCA   | NM_002849:    | NM_002849:                               |
| 5801   | PTPRR                                                                               | protein tyrosine phosphatase, receptor type, R                               | 0.37  | TCGCCTATTGGAAGAAGAAA    | NM_002849:    | NM_002849:                               |
| 5802   | PTPRS                                                                               | protein tyrosine phosphatase, receptor type, S                               | -3.43 | CACGCATCAGGGCTGCACAA    | NM_002850:    | NM_130854:NM_002850:                     |
| 5802   | PTPRS                                                                               | protein tyrosine phosphatase, receptor type, S                               | -1.62 | CGGTCTACTACACCATTGGAA   | NM_002850:    | NM_130853:NM_130855:NM_130854:NM_002850: |
| 148713 | PTPRV                                                                               | protein tyrosine phosphatase, receptor type, V (pseudogene)                  | -2.27 | AACGGTGAAGCAGTATATCTA   | XM_086287:    | XM_086287:                               |
| 148713 | PTPRV                                                                               | protein tyrosine phosphatase, receptor type, V (pseudogene)                  | -2.06 | AAGGTGGCAGTCATGTCCTAA   | XM_086287:    | XM_086287:                               |
| 5803   | PTPRZ1                                                                              | protein tyrosine phosphatase, receptor-type, Z polypeptide 1                 | -0.91 | ACGCTGGAATTTGGTAGTGAA   | NM_002851:    | NM_002851:                               |
| 5803   | PTPRZ1                                                                              | protein tyrosine phosphatase, receptor-type, Z polypeptide 1                 | -0.10 | TAGCCATATACCAATACCTAA   | NM_002851:    | NM_002851:                               |
| 5805   | PTS                                                                                 | 6-pyruvoyltransferase                                                        | -0.24 | TAGGTGAATCTTAAAGAAATA   | NM_000317:    | NM_000317:                               |
| 5805   | PTS                                                                                 | 6-pyruvoyltransferase                                                        | 1.07  | TTGAGTAGGTGAATCTTAA     | NM_000317:    | NM_000317:                               |
| 9232   | PTTG1                                                                               | pituitary tumor-transforming 1                                               | -3.35 | AAGACCTGCAATAATCCAGAA   | NM_004219:    | NM_004219:                               |
| 9232   | PTTG1                                                                               | pituitary tumor-transforming 1                                               | 0.21  | CAGAATGGCTACTGTGATCTA   | NM_004219:    | NM_004219:                               |
| 754    | PTTG1IP                                                                             | pituitary tumor-transforming 1 interacting protein                           | -0.04 | AACCCGTATGCTAGATTGAA    | NM_004339:    | NM_004339:                               |
| 754    | PTTG1IP                                                                             | pituitary tumor-transforming 1 interacting protein                           | -0.59 | CACAGTCTGATAAGGACCTTAA  | NM_004339:    | NM_004339:                               |
| 10744  | PTTG2 (pituitary tumor-transforming 2)                                              | pituitary tumor-transforming 2                                               | -0.64 | AAGCTGGAGTCTAGACCTTCA   | NM_006607:    | NM_006607:                               |
| 10744  | PTTG2 (pituitary tumor-transforming 2)                                              | pituitary tumor-transforming 2                                               | 0.64  | TACGTTGATAAGGAATTGGA    | NM_006607:    | NM_006607:                               |
| 5817   | PVR                                                                                 | poliovirus receptor                                                          | -1.40 | ACGGGTGACCTCATACATCAA   | NM_006505:    | NM_006505:                               |
| 5817   | PVR                                                                                 | poliovirus receptor                                                          | -0.24 | CAACACAACITTAATCTGCAA   | NM_006505:    | NM_006505:                               |
| 5818   | PVRL1                                                                               | poliovirus receptor-related 1 (herpesvirus entry mediator C; nectin)         | 0.32  | ACAGATCAGTCTGTCAATAAA   | NM_203286:    | NM_203286:                               |
| 5818   | PVRL1                                                                               | poliovirus receptor-related 1 (herpesvirus entry mediator C; nectin)         | -0.07 | AGGGTGTGTGTCAGAAATCTA   | NM_203286:    | NM_203286:                               |
| 5819   | PVRL2                                                                               | poliovirus receptor-related 2 (herpesvirus entry mediator B)                 | -3.18 | CAGGTCTCTTTGTCGAGAAA    | NM_002856:    | NM_002856:                               |
| 5819   | PVRL2                                                                               | poliovirus receptor-related 2 (herpesvirus entry mediator B)                 | -0.19 | CTGGACGACACTGGAGTGGAA   | NM_002856:    | NM_002856:                               |
| 25945  | PVRL3                                                                               | poliovirus receptor-related 3                                                | -0.74 | AAGGTGTTAATCTCAAATGTA   | NM_015480:    | NM_015480:                               |
| 25945  | PVRL3                                                                               | poliovirus receptor-related 3                                                | -0.97 | CACATGTAGATGGTCCGTAA    | NM_015480:    | NM_015480:                               |
| 81607  | PVRL4                                                                               | poliovirus receptor-related 4                                                | -3.72 | CAGAGCAGTATTAATGATGCA   | NM_030916:    | NM_030916:                               |
| 81607  | PVRL4                                                                               | poliovirus receptor-related 4                                                | -0.29 | CCCTGATAGTCTCAAGGACAA   | NM_030916:    | NM_030916:                               |
| 7837   | PXDN                                                                                | peroxidase homolog (Drosophila)                                              | -0.12 | CAGGAGTGGAAATGATACATT   | XM_056455:    | XM_056455:                               |
| 7837   | PXDN                                                                                | peroxidase homolog (Drosophila)                                              | 1.61  | AACAACCGGATTACACATTTA   | XM_056455:    | XM_056455:                               |
| 137902 | PXNDL                                                                               | peroxidase homolog-like (Drosophila)                                         | 1.58  | AAGAATATCATGGAATATTTA   | NM_144651:    | NM_144651:                               |
| 137902 | PXNDL                                                                               | peroxidase homolog-like (Drosophila)                                         | -0.41 | CAAGACTGCTGCGAGATAAA    | NM_144651:    | NM_144651:                               |
| 54899  | PXK                                                                                 | PX domain containing serine/threonine kinase                                 | -0.56 | CTGGCAGATTGTTGAAGATA    | NM_017771:    | NM_017771:                               |
| 54899  | PXK                                                                                 | PX domain containing serine/threonine kinase                                 | 2.28  | TAAGTCCCTACAAGTTAAA     | NM_017771:    | NM_017771:                               |
| 5828   | PXMP3                                                                               | peroxisomal membrane protein 3, 35kDa (Zellweger syndrome)                   | 0.02  | ACCATTTAGTATCCTTTATA    | NM_000318:    | NM_000318:                               |
| 5828   | PXMP3                                                                               | peroxisomal membrane protein 3, 35kDa (Zellweger syndrome)                   | 0.66  | CCTAATAGTGACAATACATTA   | NM_000318:    | NM_000318:                               |
| 5829   | PXN                                                                                 | paxillin                                                                     | 0.22  | CGACTGAAACTGGAACCCCTT   | NM_002859:    | NM_002859:                               |
| 5829   | PXN                                                                                 | paxillin                                                                     | 0.36  | TCCGACTTTGATGATTTCTA    | NM_002859:    | NM_002859:                               |
| 29108  | PYCARD                                                                              | PYD and CARD domain containing                                               | -0.72 | CAGCTTCTACCTGGAGACCTA   | NM_013258:    | NM_013258:NM_145182:                     |
| 29108  | PYCARD                                                                              | PYD and CARD domain containing                                               | 1.61  | CGGAGGGTCCACAAACGTTGA   | NM_013258:    | NM_145183:NM_013258:NM_145182:           |
| 5834   | PYGB                                                                                | phosphorylase, glycogen; brain                                               | 0.98  | TCCTAGTTTCTGTAAGGAAA    | NM_002862:    | NM_002862:                               |
| 5834   | PYGB                                                                                | phosphorylase, glycogen; brain                                               | -2.21 | CAGGTTGAAAGTGATCTTCT    | NM_002862:    | NM_002862:                               |
| 5836   | PYGL (phosphorylase, glycogen; liver (Hers disease, glycogen storage disease))      | phosphorylase, glycogen; liver (Hers disease, glycogen storage disease)      | -0.05 | AACGTGGAACCTCTAGATCTA   | NM_002863:    | NM_002863:                               |
| 5836   | PYGL (phosphorylase, glycogen; liver (Hers disease, glycogen storage disease))      | phosphorylase, glycogen; liver (Hers disease, glycogen storage disease)      | -0.56 | CTCCAGTGACCGAACAATTA    | NM_002863:    | NM_002863:                               |
| 5837   | PYGM (phosphorylase, glycogen; muscle (McArdle syndrome, glycogen storage disease)) | phosphorylase, glycogen; muscle (McArdle syndrome, glycogen storage disease) | -2.12 | CAAGTTGAAGTTTCTGCTCTA   | NM_005609:    | NM_005609:                               |
| 5837   | PYGM (phosphorylase, glycogen; muscle (McArdle syndrome, glycogen storage disease)) | phosphorylase, glycogen; muscle (McArdle syndrome, glycogen storage disease) | -0.08 | TCGGGATGTTGGCCAAAGTGAA  | NM_005609:    | NM_005609:                               |
| 26108  | PYGO1                                                                               | pygopus homolog 1 (Drosophila)                                               | 0.18  | ACGCAGAATAAGCCACGACAA   | NM_015617:    | NM_015617:                               |
| 26108  | PYGO1                                                                               | pygopus homolog 1 (Drosophila)                                               | -0.31 | TGAAACAATGCGAGTAAATCA   | NM_015617:    | NM_015617:                               |
| 90780  | PYGO2                                                                               | pygopus homolog 2 (Drosophila)                                               | 0.25  | CAGCCATCTGTTGGACATTA    | NM_138300:    | NM_138300:                               |
| 90780  | PYGO2                                                                               | pygopus homolog 2 (Drosophila)                                               | 0.13  | ACGTATCTTCTCATACCAAA    | NM_138300:    | NM_138300:                               |
| 5858   | PZP                                                                                 | pregnancy-zone protein                                                       | 0.05  | CAGACTTGGGATGGACACAAA   | NM_002864:    | NM_002864:                               |
| 5858   | PZP                                                                                 | pregnancy-zone protein                                                       | 0.35  | TACCAGTATCTCGGTTAATA    | NM_002864:    | NM_002864:                               |
| 5859   | QARS                                                                                | glutamyl-tRNA synthetase                                                     | -0.06 | CACGTGGTGGATGCAGCATTA   | NM_005051:    | NM_005051:                               |
| 5859   | QARS                                                                                | glutamyl-tRNA synthetase                                                     | -3.74 | CACCATGAATCTACTAAAGCA   | NM_005051:    | NM_005051:                               |
| 5860   | QDPR                                                                                | quinoid dihydropteridine reductase                                           | -0.37 | CAGTCAGAGATGAGTACTACTA  | NM_000320:    | NM_000320:                               |
| 5860   | QDPR                                                                                | quinoid dihydropteridine reductase                                           | 0.15  | ACCTTAGAATTCCTAGTTGA    | NM_000320:    | NM_000320:                               |
| 54870  | QRICH1                                                                              | glutamine-rich 1                                                             | 0.06  | CGGAAATATTGAAGTCTTAA    | NM_017730:    | NM_017730:                               |
| 54870  | QRICH1                                                                              | glutamine-rich 1                                                             | 0.56  | ACGGCTCAAACCTGCCATATA   | NM_017730:    | NM_017730:NM_198880:                     |
| 5768   | QSCN6                                                                               | quiescin Q6                                                                  | -3.00 | CTGCTTGGTCTTGGCCCTCAA   | NM_002826:    | NM_002826:NM_001004128:                  |
| 5768   | QSCN6                                                                               | quiescin Q6                                                                  | -0.47 | CAGGTCTCTTATACCGCTTA    | NM_002826:    | NM_002826:NM_001004128:                  |
| 10890  | RAB10 (RAB10)                                                                       | RAB10, member RAS oncogene family                                            | 0.46  | CAAAATCGGTTTCATATCTTA   | NM_016131:    | NM_016131:                               |
| 10890  | RAB10 (RAB10)                                                                       | RAB10, member RAS oncogene family                                            | 0.74  | CTGATGTAACCTGCTAGGTA    | NM_016131:    | NM_016131:                               |
| 8766   | RAB11A                                                                              | RAB11A, member RAS oncogene family                                           | -3.93 | AAGAGCGATATCGAGCTATA    | NM_004663:    | NM_004663:                               |
| 8766   | RAB11A                                                                              | RAB11A, member RAS oncogene family                                           | -2.88 | TAGGCATTGATAGATCTGAA    | NM_004663:    | NM_004663:                               |
| 9230   | RAB11B                                                                              | RAB11B, member RAS oncogene family                                           | 1.65  | CGCATCACCTCCGGCTACTA    | NM_004218:    | NM_004218:                               |
| 9230   | RAB11B                                                                              | RAB11B, member RAS oncogene family                                           | -2.25 | CGCATCGTGTCCACAGAAACA   | NM_004218:    | NM_004218:                               |
| 80223  | RAB11FIP1                                                                           | RAB11 family interacting protein 1 (class I)                                 | -0.91 | CACAGAGTTGGGAATTCACAA   | NM_001002233: | NM_001002233:NM_001002814:               |
| 80223  | RAB11FIP1                                                                           | RAB11 family interacting protein 1 (class I)                                 | 0.41  | CAGGTTAATGATTAACAATTA   | NM_001002233: | NM_001002233:NM_025151:NM_001002814:     |
| 5872   | RAB13                                                                               | RAB13, member RAS oncogene family                                            | 0.89  | ATGGTCTTCTGGTATTAATA    | NM_002870:    | NM_002870:                               |
| 5872   | RAB13                                                                               | RAB13, member RAS oncogene family                                            | 0.24  | CAGGCCAAACATAAATGTAAA   | NM_002870:    | NM_002870:                               |
| 51552  | RAB14                                                                               | RAB14, member RAS oncogene family                                            | 1.09  | CACGTTAATAGAGGTAGTACA   | NM_016322:    | NM_016322:                               |
| 51552  | RAB14                                                                               | RAB14, member RAS oncogene family                                            | 0.30  | TGCATTGATCCGCTATCTTAA   | NM_016322:    | NM_016322:                               |
| 64284  | RAB17                                                                               | RAB17, member RAS oncogene family                                            | 0.17  | CAGCCTCTGGACAGAGAGGAA   | NM_022449:    | NM_022449:                               |
| 64284  | RAB17                                                                               | RAB17, member RAS oncogene family                                            | -4.29 | CAGGAAGGATCCCTCTCCAA    | NM_022449:    | NM_022449:                               |
| 22931  | RAB18                                                                               | RAB18, member RAS oncogene family                                            | 0.55  | ACCAACTGTACAGACTAATA    | NM_021252:    | NM_021252:                               |
| 22931  | RAB18                                                                               | RAB18, member RAS oncogene family                                            | -0.07 | CCAGGCCAAATTTATAACTAAA  | NM_021252:    | NM_021252:                               |



|        |                                                 |                                         |       |                        |            |                                          |
|--------|-------------------------------------------------|-----------------------------------------|-------|------------------------|------------|------------------------------------------|
| 5861   | RAB1A                                           | RAB1A, member RAS oncogene family       | -0.35 | AACTATAGAGTTAGACGGGAA  | NM_004161: | NM_004161:                               |
| 5861   | RAB1A                                           | RAB1A, member RAS oncogene family       | 1.00  | CTGCAGGAAATAGATCGTTAT  | NM_004161: | NM_004161:                               |
| 389721 | rab1c                                           | small GTP-binding protein               | -0.06 | CGGATATGACTGCCTGTTTA   | XM_372086: | XM_497021:                               |
| 389721 | rab1c                                           | small GTP-binding protein               | -3.79 | TGGCTTCCTGGGTATATGA    | XM_372086: | XM_497021:                               |
| 5862   | RAB2                                            | RAB2, member RAS oncogene family        | 0.20  | ACGATATTACCGGAGAGATA   | NM_002865: | NM_002865:                               |
| 5862   | RAB2                                            | RAB2, member RAS oncogene family        | -0.12 | ATCCGTCAAATTCCTGTATA   | NM_002865: | NM_002865:                               |
| 55647  | RAB20                                           | RAB20, member RAS oncogene family       | -2.13 | CAGCAGAAATGTTGGAGTGGAA | NM_017817: | NM_017817:                               |
| 55647  | RAB20                                           | RAB20, member RAS oncogene family       | 0.95  | CGACGTGTTTCATTATACAAA  | NM_017817: | NM_017817:                               |
| 23011  | RAB21                                           | RAB21, member RAS oncogene family       | -0.08 | CAGGCCCGTAAGTCTACTA    | NM_014999: | NM_014999:                               |
| 23011  | RAB21                                           | RAB21, member RAS oncogene family       | 0.20  | CGAGAACAAGTTTAAACGACAA | NM_014999: | NM_014999:                               |
| 57403  | RAB22A                                          | RAB22A, member RAS oncogene family      | 0.81  | AAGGCCTATCAGCCAATTTAA  | NM_020673: | NM_020673:                               |
| 57403  | RAB22A                                          | RAB22A, member RAS oncogene family      | -0.63 | CAGGTTTAAATTTGAGGTCTA  | NM_020673: | NM_020673:                               |
| 51715  | RAB23                                           | RAB23, member RAS oncogene family       | 0.02  | AAGGTTTAAAGTTAAGATCTA  | NM_016277: | NM_016277:NM_183227:                     |
| 51715  | RAB23                                           | RAB23, member RAS oncogene family       | 1.00  | CAGAATTTATATGTTTATTA   | NM_016277: | NM_016277:NM_183227:                     |
| 53917  | RAB24 (RAB: RAB24, member RAS oncogene family   |                                         | -5.18 | CCCAGCCGAGAACGGAGCTTAA | NM_130781: | NM_130781:NM_001031677:                  |
| 53917  | RAB24 (RAB: RAB24, member RAS oncogene family   |                                         | 0.84  | CGGACTGTGACATTAGGTAT   | NM_130781: | NM_130781:NM_001031677:                  |
| 57111  | RAB25                                           | RAB25, member RAS oncogene family       | 0.67  | AGGTTGAGGGCATTAGGCAAA  | NM_020387: | NM_020387:                               |
| 57111  | RAB25                                           | RAB25, member RAS oncogene family       | 0.02  | GAGCTCTATGACCATGCTGAA  | NM_020387: | NM_020387:                               |
| 25837  | RAB26                                           | RAB26, member RAS oncogene family       | -0.55 | CGCAGTGTACCACATGCCTA   | NM_014353: | NM_014353:                               |
| 25837  | RAB26                                           | RAB26, member RAS oncogene family       | -2.10 | TCCGGCTGCATGATTACGTTA  | NM_014353: | NM_014353:                               |
| 5873   | RAB27A                                          | RAB27A, member RAS oncogene family      | 0.55  | AAGATAGATGTTCAATTGAA   | NM_004580: | NM_183234:NM_183235:NM_183236:NM_004580: |
| 5873   | RAB27A                                          | RAB27A, member RAS oncogene family      | 0.91  | CACCATAATTTAAATAAGAA   | NM_004580: | NM_183234:NM_183235:NM_183236:NM_004580: |
| 5874   | RAB27B (RAI: RAB27B, member RAS oncogene family |                                         | 1.37  | ACCGAATGGATCTTCAGGGGAA | NM_004163: | NM_004163:                               |
| 5874   | RAB27B (RAI: RAB27B, member RAS oncogene family |                                         | 1.16  | TAAGCTGTACTAGAATGAATA  | NM_004163: | NM_004163:                               |
| 9364   | RAB28                                           | RAB28, member RAS oncogene family       | -2.36 | CAGCGTATTGTCCAGGGCAGAA | NM_004249: | NM_004249:                               |
| 9364   | RAB28                                           | RAB28, member RAS oncogene family       | -0.56 | CAGGGCAGAAAATGTAAGTA   | NM_004249: | NM_004249:                               |
| 84932  | RAB2B                                           | RAB2B, member RAS oncogene family       | -0.98 | AGGGTCTCTTATCTCCCTA    | NM_032846: | NM_032846:                               |
| 84932  | RAB2B                                           | RAB2B, member RAS oncogene family       | -1.62 | CAGCGGAACCTCTGTCGACATA | NM_032846: | NM_032846:                               |
| 27314  | RAB30 (RAB: RAB30, member RAS oncogene family   |                                         | 0.70  | AAGAGAGATTTCCGGTCCATTA | NM_014488: | NM_014488:                               |
| 27314  | RAB30 (RAB: RAB30, member RAS oncogene family   |                                         | 0.29  | TCGGTCCATTACCCAGAGTTA  | NM_014488: | NM_014488:                               |
| 11031  | RAB31                                           | RAB31, member RAS oncogene family       | 0.86  | AAGGAATACGGTGAATCCATA  | NM_006868: | NM_006868:                               |
| 11031  | RAB31                                           | RAB31, member RAS oncogene family       | 0.07  | CAGGATTCACATAAACATTTG  | NM_006868: | NM_006868:                               |
| 10981  | RAB32 (RAB: RAB32, member RAS oncogene family   |                                         | 0.95  | CACCAAAGCTTTCCTAATGAA  | NM_006834: | NM_006834:                               |
| 10981  | RAB32 (RAB: RAB32, member RAS oncogene family   |                                         | -2.65 | CTCTGCAAAAGGATAACATAAA | NM_006834: | NM_006834:                               |
| 9363   | RAB33A                                          | RAB33A, member RAS oncogene family      | 1.06  | AACGATATAAATACAAGATA   | NM_004794: | NM_004794:                               |
| 9363   | RAB33A                                          | RAB33A, member RAS oncogene family      | -1.07 | AAGCATGGTGCAGCATTACTA  | NM_004794: | NM_004794:                               |
| 83452  | RAB33B                                          | RAB33B, member RAS oncogene family      | 0.42  | AAGGTTTAAAGCACACCTAAT  | NM_031296: | NM_031296:                               |
| 83452  | RAB33B                                          | RAB33B, member RAS oncogene family      | 0.95  | CCGAGTTGGTTCCTACTAAA   | NM_031296: | NM_031296:                               |
| 83871  | RAB34                                           | RAB34, member RAS oncogene family       | -3.24 | CCGCGTATCTGAGGAACCTAT  | NM_031934: | NM_031934:                               |
| 83871  | RAB34                                           | RAB34, member RAS oncogene family       | 1.12  | CCGGTATTGTAGGAACCATTA  | NM_031934: | NM_031934:                               |
| 11021  | RAB35                                           | RAB35, member RAS oncogene family       | 1.54  | AGGTTGTCCTGCAAAITCAA   | NM_006861: | NM_006861:                               |
| 11021  | RAB35                                           | RAB35, member RAS oncogene family       | 2.00  | CAGTTTCGTGCCGTTATTTAA  | NM_006861: | NM_006861:                               |
| 9609   | RAB36 (RAB: RAB36, member RAS oncogene family   |                                         | -0.99 | AGGCACTGTGGTGTCCCATTA  | NM_004914: | NM_004914:                               |
| 9609   | RAB36 (RAB: RAB36, member RAS oncogene family   |                                         | -0.05 | CAGCTCAGCGATTGCCAAATA  | NM_004914: | NM_004914:                               |
| 326624 | RAB37                                           | RAB37, member RAS oncogene family       | 0.74  | AAGCGCGATATGAGCAGCGAA  | NM_175738: | NM_175738:NM_00106637:NM_00106638:       |
| 326624 | RAB37                                           | RAB37, member RAS oncogene family       | 1.03  | CGAGTTTAAACCAATGCAATA  | NM_175738: | NM_175738:NM_00106637:                   |
| 23682  | RAB38                                           | RAB38, member RAS oncogene family       | 1.15  | ATGATTTGGACTCCAAAGTTAA | NM_022337: | NM_022337:                               |
| 23682  | RAB38                                           | RAB38, member RAS oncogene family       | -1.45 | CTCCAAGTTAAGTCTCCCTAA  | NM_022337: | NM_022337:                               |
| 54734  | RAB39 (RAB: RAB39, member RAS oncogene family   |                                         | -0.01 | CAGGAGCGGTTCCAGATCAATA | NM_017516: | NM_017516:                               |
| 54734  | RAB39 (RAB: RAB39, member RAS oncogene family   |                                         | -0.31 | TAGCTTCAACACGTCGAATTA  | NM_017516: | NM_017516:                               |
| 116442 | RAB39B (RAI: RAB39B, member RAS oncogene family |                                         | 0.81  | AAAGATTATGAGCTCTACTTA  | NM_171998: | NM_171998:                               |
| 116442 | RAB39B (RAI: RAB39B, member RAS oncogene family |                                         | 0.07  | CAGGAGGCACTGTAACCCCTTA | NM_171998: | NM_171998:                               |
| 5864   | RAB3A (RAB: RAB3A, member RAS oncogene family   |                                         | 0.32  | CCCGTCAACCTATTATTATTA  | NM_002866: | NM_002866:                               |
| 5864   | RAB3A (RAB: RAB3A, member RAS oncogene family   |                                         | -0.02 | CCGGACCATCACCCCGCATA   | NM_002866: | NM_002866:                               |
| 5865   | RAB3B (RAB: RAB3B, member RAS oncogene family   |                                         | -2.27 | CGGACCATCACACAGCCCTA   | NM_002867: | NM_002867:                               |
| 5865   | RAB3B (RAB: RAB3B, member RAS oncogene family   |                                         | 1.14  | CGGGTGCAGAATCACTTTACA  | NM_002867: | NM_002867:                               |
| 115827 | RAB3C (RAB: RAB3C, member RAS oncogene family   |                                         | -1.02 | ATCGAGTCAAGATTTGGTCAA  | NM_138453: | NM_138453:                               |
| 115827 | RAB3C (RAB: RAB3C, member RAS oncogene family   |                                         | 1.48  | TACAAGATTTGGTCAACTCAA  | NM_138453: | NM_138453:                               |
| 9545   | RAB3D                                           | RAB3D, member RAS oncogene family       | -0.59 | CAGGCCCTGTTTGGCTGTTTA  | NM_004283: | NM_004283:                               |
| 9545   | RAB3D                                           | RAB3D, member RAS oncogene family       | 0.02  | TCCGTGGTGCCTCTAGCTTA   | NM_004283: | NM_004283:                               |
| 142684 | RAB40A                                          | RAB40A, member RAS oncogene family      | 1.76  | CAGAAGAGCAAAAGATAATA   | NM_080879: | NM_080879:                               |
| 142684 | RAB40A                                          | RAB40A, member RAS oncogene family      | -0.17 | TCCGATTTGAGATTCAAGAAA  | NM_080879: | NM_080879:                               |
| 10966  | RAB40B                                          | RAB40B, member RAS oncogene family      | 1.33  | CCGTCCGACTTCGAAATTTCTA | NM_006822: | NM_006822:                               |
| 10966  | RAB40B                                          | RAB40B, member RAS oncogene family      | 0.50  | TCGGGAAATGCTGCTGGCGAA  | NM_006822: | NM_006822:                               |
| 57799  | RAB40C                                          | RAB40C, member RAS oncogene family      | -4.27 | CAGTAACGGGATCGACTACAA  | NM_021168: | NM_021168:                               |
| 57799  | RAB40C                                          | RAB40C, member RAS oncogene family      | 1.18  | TCCGGAAATCTTGGTCCGAAA  | NM_021168: | NM_021168:                               |
| 347517 | RAB41 (RAB: RAB41, member RAS homolog family    |                                         | -3.83 | AAGATTGATTTGGATAACAAA  | XM_293398: | NM_001032726:                            |
| 347517 | RAB41 (RAB: RAB41, member RAS homolog family    |                                         | 0.70  | GTGTTGTCTATGACATTACA   | XM_293398: | NM_001032726:                            |
| 339122 | RAB43                                           | RAB43, member RAS oncogene family       | -1.54 | CCGGCCCTTCGGCTTCTTCTA  | XM_290714: | NM_198490:                               |
| 339122 | RAB43                                           | RAB43, member RAS oncogene family       | 0.19  | GCAGTACGATTTCCGTGTCAA  | XM_290714: | NM_198490:                               |
| 5867   | RAB4A                                           | RAB4A, member RAS oncogene family       | -0.35 | AACCTACAATGCCGTTACTAA  | NM_004578: | NM_004578:                               |
| 5867   | RAB4A                                           | RAB4A, member RAS oncogene family       | 0.47  | CACCGTTAGATGTGTATGTAA  | NM_004578: | NM_004578:                               |
| 53916  | RAB4B                                           | RAB4B, member RAS oncogene family       | -2.64 | CGCACTATCCTCAACAAAGAT  | NM_016154: | NM_016154:                               |
| 5868   | RAB5A                                           | RAB5A, member RAS oncogene family       | 0.68  | ATCAGTGTAGTAACTATAA    | NM_004162: | NM_004162:                               |
| 5868   | RAB5A                                           | RAB5A, member RAS oncogene family       | -2.06 | CAAGGCCGACCTAGCAATAAA  | NM_004162: | NM_004162:                               |
| 5869   | RAB5B (RAB: RAB5B, member RAS oncogene family   |                                         | 0.23  | CAGAATGCGGACTGCTGATTTA | NM_002868: | NM_002868:                               |
| 5869   | RAB5B (RAB: RAB5B, member RAS oncogene family   |                                         | 0.32  | TAGGTACAAGACAGCGACTTA  | NM_002868: | NM_002868:                               |
| 5878   | RAB5C                                           | RAB5C, member RAS oncogene family       | 0.18  | CACCATGATTTTCCATATAA   | NM_004583: | NM_201434:NM_004583:                     |
| 5878   | RAB5C                                           | RAB5C, member RAS oncogene family       | 0.12  | CCCAGCTGGAATCCACTCTAA  | NM_004583: | NM_201434:NM_004583:                     |
| 5870   | RAB6A                                           | RAB6A, member RAS oncogene family       | -2.30 | CCCCTATTGTCACTCTGTA    | NM_002869: | NM_002869:NM_198996:                     |
| 5870   | RAB6A                                           | RAB6A, member RAS oncogene family       | 0.01  | TACGGTCTTCTTTGAGGTCAA  | NM_002869: | NM_002869:NM_198996:                     |
| 51560  | RAB6B (RAB: RAB6B, member RAS oncogene family   |                                         | -0.33 | CAGGATCACATCACTCTTAA   | NM_016577: | NM_016577:                               |
| 51560  | RAB6B (RAB: RAB6B, member RAS oncogene family   |                                         | -2.12 | CGGCTGTACTTAAACAACATA  | NM_016577: | NM_016577:                               |
| 84084  | RAB6C                                           | RAB6C, member RAS oncogene family       | 1.18  | AGCAGAAATAACGATATCTAA  | NM_032144: | NM_032144:                               |
| 84084  | RAB6C                                           | RAB6C, member RAS oncogene family       | 0.92  | CAGGTAAGCATACATAGTAGA  | NM_032144: | NM_032144:                               |
| 23085  | RAB6IP2                                         | RAB6 interacting protein 2              | 0.68  | CAGGAACCTAACCCAAATCTA  | NM_015064: | NM_178037:NM_178038:NM_178039:NM_178040: |
| 23085  | RAB6IP2                                         | RAB6 interacting protein 2              | -0.02 | TAGAAGTAAATTAAGTTGTA   | NM_015064: | NM_178037:NM_178038:NM_178039:NM_178040: |
| 7879   | RAB7                                            | RAB7, member RAS oncogene family        | -0.03 | CAGTAGGCGCTTCAACACAAT  | NM_004637: | NM_004637:                               |
| 7879   | RAB7                                            | RAB7, member RAS oncogene family        | -1.49 | TAGATCAGCATCTACTACAA   | NM_004637: | NM_004637:                               |
| 338382 | RAB7B                                           | RAB7B, member RAS oncogene family       | -1.30 | CAGCATCCTCTCGAAGATTAT  | NM_177403: | NM_177403:                               |
| 338382 | RAB7B                                           | RAB7B, member RAS oncogene family       | -0.47 | TCGAGGTACCAGGACATCTTA  | NM_177403: | NM_177403:                               |
| 8934   | RAB7L1                                          | RAB7, member RAS oncogene family-like 1 | 0.16  | AACTTCTAACGTCATAATTTAA | NM_003929: | NM_003929:                               |
| 8934   | RAB7L1                                          | RAB7, member RAS oncogene family-like 1 | -1.02 | TAGGCACTTAGTCATAGGAAA  | NM_003929: | NM_003929:                               |
| 4218   | RAB8A                                           | RAB8A, member RAS oncogene family       | -2.06 | ATGCTCTGTTACATCGATAA   | NM_005370: | NM_005370:                               |
| 4218   | RAB8A                                           | RAB8A, member RAS oncogene family       | 0.50  | TCGCCAGAGATATCAAAAGCAA | NM_005370: | NM_005370:                               |

|        |          |                                                                                  |       |                        |               |                                                                                      |
|--------|----------|----------------------------------------------------------------------------------|-------|------------------------|---------------|--------------------------------------------------------------------------------------|
| 51762  | RAB8B    | RAB8B, member RAS oncogene family                                                | 0.57  | CAGCACAATCTTAGACTCATA  | NM_016530:    | NM_016530:                                                                           |
| 51762  | RAB8B    | RAB8B, member RAS oncogene family                                                | 0.35  | CAGCAGAGGTTAATAATACTAA | NM_016530:    | NM_016530:                                                                           |
| 9367   | RAB9A    | RAB9A, member RAS oncogene family                                                | 0.75  | CAGCAGTGATCATCTACTAA   | NM_004251:    | NM_004251:                                                                           |
| 9367   | RAB9A    | RAB9A, member RAS oncogene family                                                | 1.84  | GACCAAGACTTTAATATAAA   | NM_004251:    | NM_004251:                                                                           |
| 51209  | RAB9B    | RAB9B, member RAS oncogene family                                                | 0.60  | CAGGGTCTTCGGTCTTTAAA   | NM_016370:    | NM_016370:                                                                           |
| 51209  | RAB9B    | RAB9B, member RAS oncogene family                                                | 1.89  | CTGGCAGAAAGAAATTTATTA  | NM_016370:    | NM_016370:                                                                           |
| 10244  | RABEPK   | Rab9 effector protein with kelch motifs                                          | -0.80 | AAGCAACATGGTACACCTTGA  | NM_005833:    | NM_005833:                                                                           |
| 10244  | RABEPK   | Rab9 effector protein with kelch motifs                                          | 1.14  | ATTGATATAAGTGACATGAAA  | NM_005833:    | NM_005833:                                                                           |
| 5875   | RABGGTA  | (R Rab geranylgeranyltransferase, alpha subunit                                  | -1.57 | CAGGCCAGTGATAATGCCATA  | NM_004581:    | NM_182836:NM_004581:                                                                 |
| 5875   | RABGGTA  | (R Rab geranylgeranyltransferase, alpha subunit                                  | -2.10 | CAGGCCAGTGCCAGAAAGAAAT | NM_004581:    | NM_182836:NM_004581:                                                                 |
| 5876   | RABGGTB  | Rab geranylgeranyltransferase, beta subunit                                      | -2.72 | CCGGAGAAAGTTACCAGATGTA | NM_004582:    | NM_004582:                                                                           |
| 5876   | RABGGTB  | Rab geranylgeranyltransferase, beta subunit                                      | 0.59  | ACGCTGTATGACAGTATTAAT  | NM_004582:    | NM_004582:                                                                           |
| 11158  | RABL2B   | (RAI RAB, member of RAS oncogene family-like 2B                                  | 0.08  | AAGGACCATCCTTGTGGACTT  | NM_007081:    | NM_007081:NM_001003789:                                                              |
| 11158  | RABL2B   | (RAI RAB, member of RAS oncogene family-like 2B                                  | -0.98 | CACGGTAGATGGAAGGACCAT  | NM_007081:    | NM_007081:NM_001003789:                                                              |
| 285282 | RABL3    | RAB, member of RAS oncogene family-like 3                                        | -1.06 | CGGACTAATAGCCAGAGTTAA  | NM_173825:    | NM_173825:                                                                           |
| 285282 | RABL3    | RAB, member of RAS oncogene family-like 3                                        | -1.65 | TCCCTTAGCTATAATCAGAAA  | NM_173825:    | NM_173825:                                                                           |
| 11020  | RABL4    | RAB, member of RAS oncogene family-like 4                                        | -4.60 | AGGAATGGATTTGGTGTGAA   | NM_006860:    | NM_006860:                                                                           |
| 11020  | RABL4    | RAB, member of RAS oncogene family-like 4                                        | 1.44  | TGGGAGAGTCCCAATGTCTTA  | NM_006860:    | NM_006860:                                                                           |
| 64792  | RABL5    | RAB, member RAS oncogene family-like 5                                           | -0.40 | CAGCCCAATGATACAACAGTA  | NM_022777:    | NM_022777:                                                                           |
| 64792  | RABL5    | RAB, member RAS oncogene family-like 5                                           | -0.75 | CCGGATGGAAATCATAAAGTA  | NM_022777:    | NM_022777:                                                                           |
| 5879   | RAC1     | ras-related C3 botulinum toxin substrate 1 (rho family, small GTP bindi          | -0.79 | AAGTTGGTATTATCAGGAAA   | NM_006908:    | NM_018890:NM_198829:NM_006908:                                                       |
| 5879   | RAC1     | ras-related C3 botulinum toxin substrate 1 (rho family, small GTP bindi          | -0.33 | ACGATGTTGTGACAACTTAA   | NM_006908:    | NM_018890:NM_198829:NM_006908:                                                       |
| 5880   | RAC2     | ras-related C3 botulinum toxin substrate 2 (rho family, small GTP bindi          | 1.30  | CTCAACTGCTTAAGCAGAAA   | NM_002872:    | NM_002872:                                                                           |
| 5880   | RAC2     | ras-related C3 botulinum toxin substrate 2 (rho family, small GTP bindi          | -0.62 | AAGGATTTGACTCGGTGAAA   | NM_002872:    | NM_002872:                                                                           |
| 5881   | RAC3     | (ras-rel ras-related C3 botulinum toxin substrate 3 (rho family, small GTP bindi | -0.64 | CCGGGAGATGGCTCTGTGAA   | NM_005052:    | NM_005052:                                                                           |
| 5881   | RAC3     | (ras-rel ras-related C3 botulinum toxin substrate 3 (rho family, small GTP bindi | 0.19  | CGCGCCATGACAGCCATCAA   | NM_005052:    | NM_005052:                                                                           |
| 29127  | RACGAP1  | Rac GTPase activating protein 1                                                  | -9.84 | CTGAATGTATCTCCAGCTAT   | NM_013277:    | NM_013277:                                                                           |
| 29127  | RACGAP1  | Rac GTPase activating protein 1                                                  | 0.02  | CTGGTAGATAGAAAGACTAAA  | NM_013277:    | NM_013277:                                                                           |
| 5810   | RAD1     | RAD1 homolog (S. pombe)                                                          | -0.54 | CAGCACAATGTTAATAATAA   | NM_002853:    | NM_001033673:NM_133377:NM_002853:                                                    |
| 5810   | RAD1     | RAD1 homolog (S. pombe)                                                          | -2.31 | CAGTATATGATTAGAAATGAA  | NM_002853:    | NM_001033673:NM_133377:NM_002853:                                                    |
| 5884   | RAD17    | RAD17 homolog (S. pombe)                                                         | 2.18  | CAGTGGTTTCTAATAATAATAA | NM_002873:    | NM_133340:NM_133344:NM_133343:NM_002873:<br>NM_133341:NM_133338:NM_133339:NM_133342: |
| 5884   | RAD17    | RAD17 homolog (S. pombe)                                                         | 1.77  | CTCAGTGGAGATAATAATCA   | NM_002873:    | NM_133340:NM_133344:NM_133343:NM_002873:<br>NM_133341:NM_133338:NM_133339:NM_133342: |
| 56852  | RAD18    | RAD18 homolog (S. cerevisiae)                                                    | 0.28  | ATGGTTGTGGCCGAGGTTAA   | NM_020165:    | NM_020165:                                                                           |
| 56852  | RAD18    | RAD18 homolog (S. cerevisiae)                                                    | -1.29 | CCCGAGGTTAATGATGTTGT   | NM_020165:    | NM_020165:                                                                           |
| 5885   | RAD21    | RAD21 homolog (S. pombe)                                                         | -1.38 | ATCGATGAGCCCAATTATTGA  | NM_006265:    | NM_006265:                                                                           |
| 5885   | RAD21    | RAD21 homolog (S. pombe)                                                         | -2.08 | CTGGGAGTAGTTCGAATCTAT  | NM_006265:    | NM_006265:                                                                           |
| 5886   | RAD23A   | RAD23 homolog A (S. cerevisiae)                                                  | 0.76  | AAGGTGCTAAGGAGAGATA    | NM_005053:    | NM_005053:                                                                           |
| 5886   | RAD23A   | RAD23 homolog A (S. cerevisiae)                                                  | -2.67 | CAGGCCTATTTCCGGTGTGAA  | NM_005053:    | NM_005053:                                                                           |
| 5887   | RAD23B   | RAD23 homolog B (S. cerevisiae)                                                  | 0.78  | CTGGGATGACTGGGGCTCATA  | NM_002874:    | NM_002874:NM_496632:                                                                 |
| 5887   | RAD23B   | RAD23 homolog B (S. cerevisiae)                                                  | 1.20  | TAGGTGCTAATTACTGTTTA   | NM_002874:    | NM_002874:                                                                           |
| 10111  | RAD50    | RAD50 homolog (S. cerevisiae)                                                    | 0.59  | CAGAAAGTGATAATAAGAAA   | NM_005732:    | NM_005732:NM_133482:                                                                 |
| 10111  | RAD50    | RAD50 homolog (S. cerevisiae)                                                    | -1.06 | CAGGAACAGATTCACATCTA   | NM_005732:    | NM_005732:NM_133482:                                                                 |
| 5888   | RAD51    | RAD51 homolog (RecA homolog, E. coli) (S. cerevisiae)                            | -2.80 | AAGGAAATGAGGAAGCCAAA   | NM_002875:    | NM_002875:NM_133487:                                                                 |
| 5888   | RAD51    | RAD51 homolog (RecA homolog, E. coli) (S. cerevisiae)                            | -0.12 | CACCTTAAATTAATGGTAAA   | NM_002875:    | NM_002875:NM_133487:                                                                 |
| 10635  | RAD51AP1 | RAD51 associated protein 1                                                       | -1.47 | AAGGATGGCTTTAGATGACAA  | NM_006479:    | NM_006479:                                                                           |
| 10635  | RAD51AP1 | RAD51 associated protein 1                                                       | -0.17 | CACCTTAACTTTAACTGTTCA  | NM_006479:    | NM_006479:                                                                           |
| 5889   | RAD51C   | RAD51 homolog C (S. cerevisiae)                                                  | 0.80  | AAGAGAATGCTCCACAATAA   | NM_002876:    | NM_002876:NM_058216:NM_058217:                                                       |
| 5889   | RAD51C   | RAD51 homolog C (S. cerevisiae)                                                  | 1.28  | CTGCAATTTATCAGAAGAGAA  | NM_002876:    | NM_002876:NM_058216:NM_058217:                                                       |
| 5890   | RAD51L1  | RAD51-like 1 (S. cerevisiae)                                                     | 1.11  | CAGAGAGAAGACAGATCTTCA  | NM_002877:    | NM_002877:NM_133510:NM_133509:                                                       |
| 5890   | RAD51L1  | RAD51-like 1 (S. cerevisiae)                                                     | 0.63  | CCCGCATGGGTAGCAAGAAA   | NM_002877:    | NM_002877:NM_133510:NM_133509:                                                       |
| 5892   | RAD51L3  | RAD51-like 3 (S. cerevisiae)                                                     | -1.58 | CTGGAAGAGGTAGCTCAGAAA  | NM_002878:    | NM_002878:NM_133627:NM_133628:NM_133629:<br>NM_133630:                               |
| 5892   | RAD51L3  | RAD51-like 3 (S. cerevisiae)                                                     | 1.84  | CTGGGTGAAAATAAGCTTATA  | NM_002878:    | NM_002878:NM_133627:NM_133628:NM_133629:<br>NM_133630:                               |
| 5893   | RAD52    | (RAD) RAD52 homolog (S. cerevisiae)                                              | 0.64  | AAGGAAGAAAATAATCATCTA  | NM_002879:    | NM_002879:NM_134423:NM_134422:NM_134424:                                             |
| 5893   | RAD52    | (RAD) RAD52 homolog (S. cerevisiae)                                              | 0.50  | CAGGAGTGACTCAAGAATTA   | NM_002879:    | NM_002879:NM_134423:NM_134422:NM_134424:                                             |
| 25788  | RAD54B   | RAD54 homolog B (S. cerevisiae)                                                  | 0.83  | ACCACAAGAAATTAATAATAA  | NM_012415:    | NM_134434:NM_012415:                                                                 |
| 25788  | RAD54B   | RAD54 homolog B (S. cerevisiae)                                                  | 1.15  | CTGGATCAAAATTAAGAATATA | NM_012415:    | NM_134434:NM_012415:                                                                 |
| 8438   | RAD54L   | RAD54-like (S. cerevisiae)                                                       | -0.77 | AAGCATTTATTCGAAGCATTT  | NM_003579:    | NM_003579:                                                                           |
| 8438   | RAD54L   | RAD54-like (S. cerevisiae)                                                       | 0.71  | ATGGAGGATCTAAGGATGAAA  | NM_003579:    | NM_003579:                                                                           |
| 5883   | RAD9A    | RAD9 homolog A (S. pombe)                                                        | -1.90 | CAGGCTCACCTCCTAAGGAAA  | NM_004584:    | NM_004584:                                                                           |
| 5883   | RAD9A    | RAD9 homolog A (S. pombe)                                                        | -0.16 | TGGCGCTGACTTGGAAITCTA  | NM_004584:    | NM_004584:                                                                           |
| 135250 | RAE1E    | retinoic acid early transcript 1E                                                | 0.89  | ATGCTCCTTTGTGACATCAA   | NM_139165:    | NM_139165:                                                                           |
| 135250 | RAE1E    | retinoic acid early transcript 1E                                                | 0.42  | AGCGCAGGCTCTTCTTGAATA  | NM_139165:    | NM_139165:                                                                           |
| 353091 | RAE1TG   | (retir) retinoic acid early transcript 1G                                        | -0.86 | TCGGTGACTTACCTATCAT    | NM_001001788: | NM_001001788:                                                                        |
| 353091 | RAE1TG   | (retir) retinoic acid early transcript 1G                                        | -0.02 | TGCGTTGATACAATAAATAA   | NM_001001788: | NM_001001788:                                                                        |
| 154064 | RAE1TL   | (retir) retinoic acid early transcript 1L                                        | 1.07  | AAGGATGCTCTTGAGCAGAAA  | NM_130900:    | NM_130900:                                                                           |
| 5894   | RAF1     | v-raf-1 murine leukemia viral oncogene homolog 1                                 | -0.04 | CAGATCTTAGTAAGCTATATA  | NM_002880:    | NM_002880:                                                                           |
| 5894   | RAF1     | v-raf-1 murine leukemia viral oncogene homolog 1                                 | 1.11  | CTCAGGTTTAAAGATTGTTTAA | NM_002880:    | NM_002880:                                                                           |
| 5896   | RAG1     | recombination activating gene 1                                                  | 1.10  | TGGGTCTTGCAATACATCAAA  | NM_000448:    | NM_000448:                                                                           |
| 5896   | RAG1     | recombination activating gene 1                                                  | 2.41  | CAGCTAAATTCACATAATCAT  | NM_000448:    | NM_000448:                                                                           |
| 5897   | RAG2     | (recom) recombination activating gene 2                                          | 1.53  | TCCAATGAATCCCTCCGTAA   | NM_000536:    | NM_000536:                                                                           |
| 5897   | RAG2     | (recom) recombination activating gene 2                                          | -0.43 | CAACACTGGGTACCATTCTA   | NM_000536:    | NM_000536:                                                                           |
| 5891   | RAGE     | renal tumor antigen                                                              | -0.30 | AAAGAATAAGCTGTCTGTTAA  | NM_014226:    | NM_014226:                                                                           |
| 5891   | RAGE     | renal tumor antigen                                                              | -0.25 | CCGGTGTGTGTTCACGAGA    | NM_014226:    | NM_014226:                                                                           |
| 10743  | RAI1     | retinoic acid induced 1                                                          | -3.73 | CAGGGTCAACAGCAACTCGAA  | NM_030665:    | NM_030665:                                                                           |
| 10743  | RAI1     | retinoic acid induced 1                                                          | -0.77 | TTGCATATTCACGAAGAGAA   | NM_030665:    | NM_030665:                                                                           |
| 5898   | RALA     | v-ral simian leukemia viral oncogene homolog A (ras related)                     | -0.43 | CCCATGTGCTGGTGGAGAAA   | NM_005402:    | NM_005402:                                                                           |
| 5898   | RALA     | v-ral simian leukemia viral oncogene homolog A (ras related)                     | 1.91  | CGCGGTGCAGATTCCTCTTAA  | NM_005402:    | NM_005402:                                                                           |
| 5899   | RALB     | (v-ral si v-ral simian leukemia viral oncogene homolog B (ras related); GTP bin  | 0.43  | AAGAATTTGCATAGCATCTTA  | NM_002881:    | NM_002881:                                                                           |
| 5899   | RALB     | (v-ral si v-ral simian leukemia viral oncogene homolog B (ras related); GTP bin  | -0.24 | CACAGAGATGGTAGAAATTAT  | NM_002881:    | NM_002881:                                                                           |
| 10267  | RAMP1    | (rece) receptor (calcitonin) activity modifying protein 1                        | -2.93 | CAGGGACGTCACCTGACTTA   | NM_005855:    | NM_005855:                                                                           |
| 10267  | RAMP1    | (rece) receptor (calcitonin) activity modifying protein 1                        | -2.90 | CAGGTTCTTCCGGCAGTGCA   | NM_005855:    | NM_005855:                                                                           |
| 10266  | RAMP2    | (rece) receptor (calcitonin) activity modifying protein 2                        | 0.10  | TGGAATCATTATAAGGATCAA  | NM_005854:    | NM_005854:                                                                           |
| 10266  | RAMP2    | (rece) receptor (calcitonin) activity modifying protein 2                        | -0.42 | CACAAGTTCGTAAATCTTCAA  | NM_005854:    | NM_005854:                                                                           |
| 10268  | RAMP3    | (rece) receptor (calcitonin) activity modifying protein 3                        | -0.40 | ATGCTGTTTCTTAGCAGAGAA  | NM_005856:    | NM_005856:                                                                           |
| 10268  | RAMP3    | (rece) receptor (calcitonin) activity modifying protein 3                        | -0.47 | CTGCACCGAGATGGAGGCCAA  | NM_005856:    | NM_005856:                                                                           |
| 5901   | RAN      | RAN, member RAS oncogene family                                                  | 1.35  | ATGGTGTGATACATATCAA    | NM_006325:    | NM_006325:                                                                           |
| 5901   | RAN      | RAN, member RAS oncogene family                                                  | 1.77  | TTGGGAATTCCTGCTGTAAA   | NM_006325:    | NM_006325:                                                                           |
| 57610  | RANBP10  | RAN binding protein 10                                                           | 0.49  | CAAGTTGGTGATAGCTTATTA  | NM_020850:    | NM_020850:                                                                           |
| 57610  | RANBP10  | RAN binding protein 10                                                           | -0.47 | GAGGATGGAGAGAGAATCTTA  | NM_020850:    | NM_020850:                                                                           |
| 5903   | RANBP2   | RAN binding protein 2                                                            | -2.60 | CCGCGCAAAATGTTTCTGTTT  | NM_006267:    | NM_006267:                                                                           |
| 5903   | RANBP2   | RAN binding protein 2                                                            | -0.29 | CAGGTGGGAACAGGATTTAAA  | NM_006267:    | NM_006267:                                                                           |

|        |                                                  |                                                            |       |                        |            |                                          |
|--------|--------------------------------------------------|------------------------------------------------------------|-------|------------------------|------------|------------------------------------------|
| 3843   | RANBP5                                           | RAN binding protein 5                                      | -0.38 | CACGAGGCAATTAACATGAA   | NM_002271: | NM_002271:                               |
| 3843   | RANBP5                                           | RAN binding protein 5                                      | -0.01 | CAGGATACCTGGCCACTCAA   | NM_002271: | NM_002271:                               |
| 10048  | RANBP9                                           | RAN binding protein 9                                      | 0.48  | AAGCAATGAGTGAACGCTAA   | NM_005493: | NM_005493:                               |
| 10048  | RANBP9                                           | RAN binding protein 9                                      | -1.91 | CAGGTGGGATAAGCATTTCAT  | NM_005493: | NM_005493:                               |
| 5906   | RAP1A                                            | RAP1A, member of RAS oncogene family                       | -3.48 | CAGGGCCAGAATTAGCAAGA   | NM_002884: | NM_001010935:NM_002884:                  |
| 5908   | RAP1B                                            | RAP1B, member of RAS oncogene family                       | 1.17  | CAGTATAATGCTTAGATTAA   | NM_015646: | NM_001010942:NM_015646:                  |
| 5908   | RAP1B                                            | RAP1B, member of RAS oncogene family                       | -0.07 | GACGAGTACTGTGGATGTGAA  | NM_015646: | NM_001010942:NM_015646:                  |
| 5911   | RAP2A                                            | RAP2A, member of RAS oncogene family                       | -1.38 | CAGAGATAATTGCCTATACCTA | NM_021033: | NM_021033:                               |
| 5911   | RAP2A                                            | RAP2A, member of RAS oncogene family                       | 0.77  | CCAGTGTATTCCGTCAGTAA   | NM_021033: | NM_021033:                               |
| 5912   | RAP2B                                            | RAP2B, member of RAS oncogene family                       | 0.13  | CTCACTTAAGTTTGATATCAA  | NM_002886: | NM_002886:                               |
| 5912   | RAP2B                                            | RAP2B, member of RAS oncogene family                       | 1.39  | TACGGTTCTTTCGTAGAACAA  | NM_002886: | NM_002886:                               |
| 57826  | RAP2C (RAP; RAP2C, member of RAS oncogene family |                                                            | -0.14 | AAGAAGCATGTTGCTATTAGA  | NM_021183: | NM_021183:                               |
| 57826  | RAP2C (RAP; RAP2C, member of RAS oncogene family |                                                            | -2.96 | ATGGGTCAGCATGACCATTAA  | NM_021183: | NM_021183:                               |
| 51720  | RAP80                                            | receptor associated protein 80                             | -1.35 | CAGTATTGACTCGGAGACAAA  | NM_016290: | NM_016290:                               |
| 51720  | RAP80                                            | receptor associated protein 80                             | -0.35 | CACGTCGTGACTTAAATGAAT  | NM_016290: | NM_016290:                               |
| 2889   | RAPGEF1                                          | Rap guanine nucleotide exchange factor (GEF) 1             | -1.29 | CAGGAAAGATTTGGTGTGTA   | NM_005312: | NM_005312:NM_198679:                     |
| 2889   | RAPGEF1                                          | Rap guanine nucleotide exchange factor (GEF) 1             | -1.68 | CAGGGTTACATTTGTAATATAT | NM_005312: | NM_005312:NM_198679:                     |
| 51195  | RAPGEFL1                                         | Rap guanine nucleotide exchange factor (GEF)-like 1        | -1.48 | ACCCAAGCTCTGGAATTGTA   | NM_016339: | NM_016339:                               |
| 51195  | RAPGEFL1                                         | Rap guanine nucleotide exchange factor (GEF)-like 1        | -2.18 | ACGGTGAACCTAAAGATTCCA  | NM_016339: | NM_016339:                               |
| 5913   | RAPSN                                            | receptor-associated protein of the synapse, 43kD           | -1.75 | CAGGTCAAGGACTACGAGAAA  | NM_005055: | NM_032645:NM_005055:                     |
| 5913   | RAPSN                                            | receptor-associated protein of the synapse, 43kD           | -7.21 | CAGGTCCTATGCCAGGTCAA   | NM_005055: | NM_032645:NM_005055:                     |
| 5914   | RARA                                             | retinoic acid receptor, alpha                              | 1.00  | TGGATAAAGAAATAAGTCTCA  | NM_000964: | NM_001033603:NM_001024809:NM_000964:     |
| 5914   | RARA                                             | retinoic acid receptor, alpha                              | -1.46 | CCACATCTTTCATCACCAGCAA | NM_000964: | NM_001033603:NM_001024809:NM_000964:     |
| 5915   | RARB                                             | retinoic acid receptor, beta                               | 1.01  | CTGCCAGTTTCAAGTAAATCAA | NM_000965: | NM_016152:NM_000965:                     |
| 5915   | RARB                                             | retinoic acid receptor, beta                               | -0.06 | ATGGAATAGTCAAGACATCAA  | NM_000965: | NM_016152:NM_000965:                     |
| 5916   | RARG                                             | retinoic acid receptor, gamma                              | -0.35 | CAGTTTGTATTTAGTGCCAA   | NM_000966: | NM_000966:                               |
| 5916   | RARG                                             | retinoic acid receptor, gamma                              | -1.88 | ATGCTCGTGCAATGACAA     | NM_000966: | NM_000966:                               |
| 5918   | RARRES1                                          | retinoic acid receptor responder (tazarotene induced) 1    | 1.71  | CCGCGCGTGATTAATCCAAA   | NM_002888: | NM_002888:NM_206963:                     |
| 5918   | RARRES1                                          | retinoic acid receptor responder (tazarotene induced) 1    | 0.66  | CCAGCAACACCTCAATGTAA   | NM_002888: | NM_002888:NM_206963:                     |
| 5919   | RARRES2                                          | retinoic acid receptor responder (tazarotene induced) 2    | -2.47 | CTGGAAGAACCAGGAGTCAAA  | NM_002889: | NM_002889:                               |
| 5919   | RARRES2                                          | retinoic acid receptor responder (tazarotene induced) 2    | 0.24  | CAGGGAGAGAACCCGTTCTA   | NM_002889: | NM_002889:                               |
| 5920   | RARRES3                                          | retinoic acid receptor responder (tazarotene induced) 3    | 0.96  | TTGCGATTAGGAGATACCAA   | NM_004585: | NM_004585:                               |
| 5920   | RARRES3                                          | retinoic acid receptor responder (tazarotene induced) 3    | 0.58  | CCCCTGTAAACAGGTGGAAA   | NM_004585: | NM_004585:                               |
| 5917   | RARS                                             | arginyl-tRNA synthetase                                    | 1.31  | TCCCGCCAAAGAGTTAAATAAA | NM_002887: | NM_002887:                               |
| 5917   | RARS                                             | arginyl-tRNA synthetase                                    | 1.35  | CTGCATATCCAGATTTGGAAA  | NM_002887: | NM_002887:                               |
| 57038  | RARSL                                            | arginyl-tRNA synthetase-like                               | 2.45  | TAAGACAACCTAAGAACTCAA  | NM_020320: | NM_020320:                               |
| 57038  | RARSL                                            | arginyl-tRNA synthetase-like                               | 0.11  | TAGATCGAATGGACAAAGTATA | NM_020320: | NM_020320:                               |
| 5921   | RASA1                                            | RAS p21 protein activator (GTPase activating protein) 1    | 1.50  | ACGGACCTGCCCCTGATTTA   | NM_002890: | NM_022650:NM_002890:                     |
| 5921   | RASA1                                            | RAS p21 protein activator (GTPase activating protein) 1    | 0.00  | CAGCTCCCATATACCATTTAA  | NM_002890: | NM_022650:NM_002890:                     |
| 10156  | RAS4A                                            | RAS p21 protein activator 4                                | 0.70  | ACGGGAGACCTCGATCGTGAA  | NM_006989: | NM_006989:                               |
| 10156  | RAS4A                                            | RAS p21 protein activator 4                                | 0.90  | CCAGAACCTTTATAAAGAGA   | NM_006989: | NM_006989:                               |
| 51655  | RASD1                                            | RAS, dexamethasone-induced 1                               | 1.02  | CGCGTGGGCACACAACTCAA   | NM_016084: | NM_016084:                               |
| 51655  | RASD1                                            | RAS, dexamethasone-induced 1                               | 0.53  | AGGGTGGATTTATCTTCTCAA  | NM_016084: | NM_016084:                               |
| 23551  | RASD2                                            | RASD family, member 2                                      | 0.31  | ATGGATCTCCGTGACACTAT   | NM_014310: | NM_014310:                               |
| 23551  | RASD2                                            | RASD family, member 2                                      | 0.75  | TCCGTGTACTACTAATATAAA  | NM_014310: | NM_014310:                               |
| 158158 | RASEF                                            | RAS and EF-hand domain containing                          | 0.01  | CAGCCATATGAACATGTTATA  | NM_152573: | NM_152573:                               |
| 158158 | RASEF                                            | RAS and EF-hand domain containing                          | -0.22 | CGGAAAGCTACATGACAGTAA  | NM_152573: | NM_152573:                               |
| 5923   | RASGRF1                                          | Ras protein-specific guanine nucleotide-releasing factor 1 | 0.33  | CCCAACCTAAATCCCAACAA   | NM_002891: | NM_153815:NM_002891:                     |
| 5923   | RASGRF1                                          | Ras protein-specific guanine nucleotide-releasing factor 1 | -1.57 | CGGGCGAAGCTCTCCCTGAA   | NM_002891: | NM_153815:NM_002891:                     |
| 115727 | RASGRP4 (R RAS guanyl releasing protein 4        |                                                            | -0.13 | CCAGGTGAAGGTAGAATGTAA  | NM_052949: | NM_052949:NM_170602:NM_170603:NM_170604: |
| 115727 | RASGRP4 (R RAS guanyl releasing protein 4        |                                                            | -1.02 | CGCGGGAAGCATGAACAGAAA  | NM_052949: | NM_052949:NM_170602:NM_170603:NM_170604: |
| 11186  | RASSF1                                           | Ras association (RalGDS/AF-6) domain family 1              | 0.45  | CTGGCCAGGTTTCATACCTTA  | NM_007182: | NM_170714:NM_170715:NM_170717:           |
| 11186  | RASSF1                                           | Ras association (RalGDS/AF-6) domain family 1              | 0.71  | TTGGCTCAATAAAGATTTCAA  | NM_007182: | NM_170716:NM_007182:NM_170712:NM_170713: |
| 283349 | RASSF3                                           | Ras association (RalGDS/AF-6) domain family 3              | -1.20 | CAAGTTGAAGATGACCTTGAA  | NM_178169: | NM_178169:                               |
| 283349 | RASSF3                                           | Ras association (RalGDS/AF-6) domain family 3              | 0.12  | CTGCCAAGTTTGCATTTTATA  | NM_178169: | NM_178169:                               |
| 83937  | RASSF4                                           | Ras association (RalGDS/AF-6) domain family 4              | -0.08 | ATGGAAGATTTGAGGAAATGAA | NM_032023: | NM_178145:NM_032023:                     |
| 83937  | RASSF4                                           | Ras association (RalGDS/AF-6) domain family 4              | 0.87  | TCCGTGGATGGCAGATTTAAA  | NM_032023: | NM_178145:NM_032023:                     |
| 83593  | RASSF5                                           | Ras association (RalGDS/AF-6) domain family 5              | -0.58 | AAGCAGGTAATGCTCATAAA   | NM_031437: | NM_182664:NM_182663:NM_182665:NM_031437: |
| 83593  | RASSF5                                           | Ras association (RalGDS/AF-6) domain family 5              | 0.83  | CAGATTTATTTGATATTATAA  | NM_031437: | NM_182664:NM_182663:NM_182665:NM_031437: |
| 30062  | RAX                                              | retina and anterior neural fold homeobox                   | 0.68  | CCAGTAAACCTAACAGGGGAA  | NM_013435: | NM_013435:                               |
| 30062  | RAX                                              | retina and anterior neural fold homeobox                   | 0.03  | CAGGTGAAGCTCTAAACTTAA  | NM_013435: | NM_013435:                               |
| 5925   | RB1                                              | retinoblastoma 1 (including osteosarcoma)                  | -1.30 | AAGTTCAACTACGCGTGTA    | NM_000321: | NM_000321:                               |
| 5925   | RB1                                              | retinoblastoma 1 (including osteosarcoma)                  | -0.79 | CAGGTTGTTGTCGAAATGGGA  | NM_000321: | NM_000321:                               |
| 9821   | RB1CC1                                           | RB1-inducible coiled-coil 1                                | -0.67 | ACGCAATCAGTTGATGATTA   | NM_014781: | NM_014781:                               |
| 9821   | RB1CC1                                           | RB1-inducible coiled-coil 1                                | 1.24  | CTGGGACGGATACAAATCCAA  | NM_014781: | NM_014781:                               |
| 57786  | RBAK                                             | RB-associated KRAB repressor                               | -0.01 | CAGAACATTTCTGTGGTACAA  | NM_021163: | NM_021163:                               |
| 57786  | RBAK                                             | RB-associated KRAB repressor                               | -1.03 | CTGAGAGTTCGTTCTCGTAA   | NM_021163: | NM_021163:                               |
| 5928   | RBBP4                                            | retinoblastoma binding protein 4                           | -0.08 | ACCGATAATGCTATTAGCCCA  | NM_005610: | NM_005610:                               |
| 5928   | RBBP4                                            | retinoblastoma binding protein 4                           | 0.97  | CAGCTATCCCTCTATATAATA  | NM_005610: | NM_005610:                               |
| 5929   | RBBP5                                            | retinoblastoma binding protein 5                           | 0.97  | ACGGCAGATCGAATAATCAGA  | NM_005057: | NM_005057:                               |
| 5929   | RBBP5                                            | retinoblastoma binding protein 5                           | 0.94  | TCCATTTAAACCGAAACTCTA  | NM_005057: | NM_005057:                               |
| 5930   | RBBP6                                            | retinoblastoma binding protein 6                           | -0.01 | CCAGTTAAGTCACTTCTGTA   | NM_006910: | NM_006910:NM_018703:                     |
| 5930   | RBBP6                                            | retinoblastoma binding protein 6                           | 0.61  | ATAGTGGTTCTCGTATTCAA   | NM_006910: | NM_006910:NM_018703:                     |
| 5931   | RBBP7                                            | retinoblastoma binding protein 7                           | -1.93 | CCGACGCAAGATGGCGAGTAA  | NM_002893: | NM_002893:                               |
| 5931   | RBBP7                                            | retinoblastoma binding protein 7                           | 1.34  | GCGGATAAGACCGTAGCTTTA  | NM_002893: | NM_002893:                               |
| 64080  | RBKS                                             | ribokinase                                                 | 0.30  | AACACAGTCACTTACCCTTA   | NM_022128: | NM_022128:                               |
| 64080  | RBKS                                             | ribokinase                                                 | 1.53  | CAGGTGGTAACTATTACCTTA  | NM_022128: | NM_022128:                               |
| 5933   | RBL1                                             | retinoblastoma-like 1 (p107)                               | -0.16 | ACAGGCTAATGTGGAGTATAA  | NM_002895: | NM_002895:NM_183404:                     |
| 5933   | RBL1                                             | retinoblastoma-like 1 (p107)                               | -0.04 | CACCAAGTGACCAACTTATAA  | NM_002895: | NM_002895:NM_183404:                     |
| 5934   | RBL2                                             | retinoblastoma-like 2 (p130)                               | 0.02  | ACCCTATATTAGGAAACTTTA  | NM_005611: | NM_005611:                               |
| 5934   | RBL2                                             | retinoblastoma-like 2 (p130)                               | 0.50  | CAGTGTCTCACTGTAAGAAA   | NM_005611: | NM_005611:                               |
| 8241   | RBM10                                            | RNA binding motif protein 10                               | -1.27 | ACCACTCACTATCGACGGCAA  | NM_005676: | NM_005676:NM_152856:                     |
| 8241   | RBM10                                            | RNA binding motif protein 10                               | -0.11 | CTCCAACCTGGCGGCTATCAA  | NM_005676: | NM_005676:NM_152856:                     |
| 10432  | RBM14                                            | RNA binding motif protein 14                               | -1.19 | CAGCCTATTCGGGCTCCTATA  | NM_006328: | NM_006328:                               |
| 10432  | RBM14                                            | RNA binding motif protein 14                               | -1.55 | CGGCAAGAAGTGAAGGGCAA   | NM_006328: | NM_006328:                               |
| 221662 | RBM24                                            | RNA binding motif protein 24                               | -3.95 | AACGATATATTGCTAGTTTCA  | NM_153020: | NM_153020:                               |
| 221662 | RBM24                                            | RNA binding motif protein 24                               | 0.19  | AAGTTAATGATAATGTGGTT   | NM_153020: | NM_153020:                               |
| 5936   | RBM4                                             | RNA binding motif protein 4                                | 0.04  | ACCGAGCAATATAATGAGCAA  | NM_002896: | NM_002896:                               |
| 5936   | RBM4                                             | RNA binding motif protein 4                                | -1.59 | CTCAGGAACCGTGACCTTAA   | NM_002896: | NM_002896:                               |
| 10181  | RBM5                                             | RNA binding motif protein 5                                | 0.62  | CCAACCTCGAATACTACTATA  | NM_005778: | NM_005778:                               |
| 10181  | RBM5                                             | RNA binding motif protein 5                                | -0.74 | CAGGATATTACTATGATCCGA  | NM_005778: | NM_005778:                               |
| 9939   | RBM8A                                            | RNA binding motif protein 8A                               | -1.51 | ACACGACAAATTCGCAAGAATA | NM_005105: | NM_005105:                               |
| 9939   | RBM8A                                            | RNA binding motif protein 8A                               | -0.08 | CAGGTCTAGGTTAAGGATTA   | NM_005105: | NM_005105:                               |

|        |                |                                                                         |       |                        |               |                                      |
|--------|----------------|-------------------------------------------------------------------------|-------|------------------------|---------------|--------------------------------------|
| 23543  | RBM9           | RNA binding motif protein 9                                             | -6.37 | AACGGTATAAAGAGATCAA    | NM_014309:    | NM_014309.NM_001031695:              |
| 23543  | RBM9           | RNA binding motif protein 9                                             | -3.83 | ACGGCTGCTTTGAAAGTTTA   | NM_014309:    | NM_014309.NM_001031695:              |
| 5950   | RBP4 (retinol) | retinol binding protein 4, plasma                                       | -0.34 | CTGGATCGTGACACAGACTA   | NM_006744:    | NM_006744:                           |
| 5950   | RBP4 (retinol) | retinol binding protein 4, plasma                                       | -0.21 | CCCTGCCAAGTTCAAGATGAA  | NM_006744:    | NM_006744:                           |
| 11317  | RBPSUHL        | recombining binding protein suppressor of hairless (Drosophila)-like    | -0.43 | CAGGTCCTTCCGGAATATTA   | NM_014276:    | NM_014276:                           |
| 11317  | RBPSUHL        | recombining binding protein suppressor of hairless (Drosophila)-like    | -0.09 | CCCATGATCATCCGTAAGTA   | NM_014276:    | NM_014276:                           |
| 9978   | RBX1           | ring-box 1                                                              | -1.12 | AAGAAGCGCTTTGAAGTGAAA  | NM_014248:    | NM_014248:                           |
| 9978   | RBX1           | ring-box 1                                                              | 0.07  | CTGCTGTACCTAATTACAAA   | NM_014248:    | NM_014248:                           |
| 149041 | RC3H1          | ring finger and CCOH-type zinc finger domains 1                         | 1.55  | CAGCAAACCTGAAACCGACTAA | NM_086409:    | NM_172071:                           |
| 149041 | RC3H1          | ring finger and CCOH-type zinc finger domains 1                         | -0.09 | CTGCAAGCAATTCAGATTTAAA | NM_086409:    | NM_172071:                           |
| 25898  | RCHY1          | ring finger and CHY zinc finger domain containing 1                     | 3.18  | TTCAAGGAAGACACAAGTGTA  | NM_015436:    | NM_015436.NM_001008925.NM_001009922: |
| 25898  | RCHY1          | ring finger and CHY zinc finger domain containing 1                     | 1.75  | TTGAGAATATTATTGGCGATA  | NM_015436:    | NM_015436.NM_001008925.NM_001009922: |
| 27297  | RCP9           | calcitonin gene-related peptide-receptor component protein              | 0.37  | CAGAGATTTACTCTAAGTTAA  | NM_014478:    | NM_014478:                           |
| 27297  | RCP9           | calcitonin gene-related peptide-receptor component protein              | -0.69 | CGGCGTTTCATGAAGTCAGA   | NM_014478:    | NM_014478:                           |
| 157506 | RDH10 (retin)  | retinol dehydrogenase 10 (all-trans)                                    | 1.03  | TGGAGACCTAATTATCCTAAA  | NM_172037:    | NM_172037:                           |
| 157506 | RDH10 (retin)  | retinol dehydrogenase 10 (all-trans)                                    | -0.03 | CGAATCAGGAAAGAAATTTGA  | NM_172037:    | NM_172037:                           |
| 51109  | RDH11          | retinol dehydrogenase 11 (all-trans and 9-cis)                          | 0.71  | GACCATTAAGCTATATGTTTA  | NM_016026:    | NM_016026:                           |
| 51109  | RDH11          | retinol dehydrogenase 11 (all-trans and 9-cis)                          | -1.43 | TAGCCCTTTAAGGATTAACATA | NM_016026:    | NM_016026:                           |
| 145226 | RDH12          | retinol dehydrogenase 12 (all-trans and 9-cis)                          | 0.49  | CACCATCACTGCCTATTTCTA  | NM_152443:    | NM_152443:                           |
| 145226 | RDH12          | retinol dehydrogenase 12 (all-trans and 9-cis)                          | 0.11  | AAGGAGAAGGCCAACCCCTAAA | NM_152443:    | NM_152443:                           |
| 112724 | RDH13 (retin)  | retinol dehydrogenase 13 (all-trans and 9-cis)                          | -1.04 | AAGTACTTCGATGGACTCAA   | NM_138412:    | NM_138412:                           |
| 112724 | RDH13 (retin)  | retinol dehydrogenase 13 (all-trans and 9-cis)                          | 0.04  | ACGAGGAAGTATAACACCCAAA | NM_138412:    | NM_138412:                           |
| 57665  | RDH14          | retinol dehydrogenase 14 (all-trans and 9-cis)                          | -0.61 | CAAGCATGGATGACATATTA   | NM_020905:    | NM_020905:                           |
| 57665  | RDH14          | retinol dehydrogenase 14 (all-trans and 9-cis)                          | -0.30 | CTGCGTGGTGTGTGCACACAAA | NM_020905:    | NM_020905:                           |
| 5959   | RDH5           | retinol dehydrogenase 5 (11-cis and 9-cis)                              | 0.33  | GTGGGTGGAGATGCACGTTAA  | NM_002905:    | NM_002905:                           |
| 5959   | RDH5           | retinol dehydrogenase 5 (11-cis and 9-cis)                              | -1.48 | CAGCAATGCCTTTGTCTTCAT  | NM_002905:    | NM_002905:                           |
| 50700  | RDH8           | retinol dehydrogenase 8 (all-trans)                                     | 0.29  | CACACCAGCAATGTATGTATA  | NM_015725:    | NM_015725:                           |
| 50700  | RDH8           | retinol dehydrogenase 8 (all-trans)                                     | -0.60 | CAGCTGTCTCTGGGAAAGCAA  | NM_015725:    | NM_015725:                           |
| 195814 | RDHE2          | retinal short chain dehydrogenase reductase isoform 1                   | 1.69  | TAGGCAGTATCCTAGACCAA   | NM_138969:    | NM_138969:                           |
| 195814 | RDHE2          | retinal short chain dehydrogenase reductase isoform 1                   | -0.52 | TCGGCGATGTTCCATCCTAAA  | NM_138969:    | NM_138969:                           |
| 5961   | RDS            | retinal degeneration, slow                                              | -0.57 | CACGGATTAGTCCACCCTTA   | NM_000322:    | NM_000322:                           |
| 5961   | RDS            | retinal degeneration, slow                                              | 0.03  | GAGGAGCGATGTGATGAATA   | NM_000322:    | NM_000322:                           |
| 5962   | RDX (radixin)  | radixin                                                                 | -0.02 | GAGGAAGAACGTGTAACCGAA  | NM_002906:    | NM_002906:                           |
| 5962   | RDX (radixin)  | radixin                                                                 | 0.21  | TGGCGAGCAGATGTTCAATTA  | NM_002906:    | NM_002906:                           |
| 9401   | RECQL4         | RecQ protein-like 4                                                     | -5.07 | CGGGAGTACCCGACTCTGAAA  | NM_004260:    | NM_004260:                           |
| 9401   | RECQL4         | RecQ protein-like 4                                                     | 0.45  | CCTCGATTCCATTATCATTTTA | NM_004260:    | NM_004260:                           |
| 65055  | REEP1          | receptor accessory protein 1                                            | -1.90 | CCGAGAATTAACAGAAACGAA  | NM_022912:    | NM_022912:                           |
| 65055  | REEP1          | receptor accessory protein 1                                            | -4.84 | AAGCCTGTAAAGTGACATGTA  | NM_022912:    | NM_022912:                           |
| 51308  | REEP2          | receptor accessory protein 2                                            | -0.11 | AACGCTGTCCACAAAGGAGAAA | NM_016606:    | NM_016606:                           |
| 51308  | REEP2          | receptor accessory protein 2                                            | -2.97 | CACGTGAAGGAGAAAGAGAAA  | NM_016606:    | NM_016606:                           |
| 221035 | REEP3          | receptor accessory protein 3                                            | -0.37 | CAAGGACATAATGTAAAGATA  | NM_001001330: | NM_001001330:                        |
| 221035 | REEP3          | receptor accessory protein 3                                            | -1.68 | TTCCAAATTTGACTACTAAA   | NM_001001330: | NM_001001330:                        |
| 80346  | REEP4          | receptor accessory protein 4                                            | 0.28  | CAGGATGCAACCCACAATGTA  | NM_025232:    | NM_025232:                           |
| 80346  | REEP4          | receptor accessory protein 4                                            | -0.11 | CCCTTCTACTATGAGATCAA   | NM_025232:    | NM_025232:                           |
| 7905   | REEP5          | receptor accessory protein 5                                            | 0.83  | CCAAATCGTTATAGAGAGCAA  | NM_005669:    | NM_005669:                           |
| 7905   | REEP5          | receptor accessory protein 5                                            | -0.75 | CTGCACATGACTACATAGTAA  | NM_005669:    | NM_005669:                           |
| 92840  | REEP6          | receptor accessory protein 6                                            | 0.30  | CGGAATAACCGAGAACGTCAAA | NM_138393:    | NM_138393:                           |
| 92840  | REEP6          | receptor accessory protein 6                                            | 0.84  | CTGCTAGGAGGCTCCCAATAAA | NM_138393:    | NM_138393:                           |
| 5068   | REG3A          | regenerating islet-derived 3 alpha                                      | 1.28  | AAGGCTTTAAAGGCAATAAAA  | NM_002580:    | NM_002580.NM_138937.NM_138938:       |
| 5068   | REG3A          | regenerating islet-derived 3 alpha                                      | 1.90  | CTGGAAGAGAATATTCGCTTA  | NM_002580:    | NM_002580.NM_138937.NM_138938:       |
| 5966   | REL            | v-rel reticuloendotheliosis viral oncogene homolog (avian)              | 0.31  | CCCGTATATAGAGATAATTGA  | NM_002908:    | NM_002908:                           |
| 5966   | REL            | v-rel reticuloendotheliosis viral oncogene homolog (avian)              | 0.21  | CCGGTGGCTATAAACCCTGATA | NM_002908:    | NM_002908:                           |
| 5970   | RELA           | v-rel reticuloendotheliosis viral oncogene homolog A, nuclear factor of | -0.04 | ATGGAGTACCCGTGAGGCTATA | NM_021975:    | NM_021975:                           |
| 5970   | RELA           | v-rel reticuloendotheliosis viral oncogene homolog A, nuclear factor of | 1.19  | CCGGATTGAGGAGAAACGTTAA | NM_021975:    | NM_021975:                           |
| 5971   | RELB           | v-rel reticuloendotheliosis viral oncogene homolog B, nuclear factor of | 0.26  | CCAGTATTGCCATTGTGTCCAA | NM_006509:    | NM_006509:                           |
| 5971   | RELB           | v-rel reticuloendotheliosis viral oncogene homolog B, nuclear factor of | 0.89  | CGGATTTCCGCAATTAACAAA  | NM_006509:    | NM_006509:                           |
| 5649   | RELN           | reelin                                                                  | 0.02  | TAGGGTGAACCAAGCTATAAA  | NM_005045:    | NM_005045.NM_173054:                 |
| 5649   | RELN           | reelin                                                                  | -2.73 | AAGGAACGCTTTGCAGCTGAA  | NM_005045:    | NM_005045.NM_173054:                 |
| 28954  | REM1           | RAS (RAD and GEM)-like GTP-binding 1                                    | 1.77  | CAGTGCATATGTCATCGTATA  | NM_014012:    | NM_014012:                           |
| 28954  | REM1           | RAS (RAD and GEM)-like GTP-binding 1                                    | -1.48 | CGCTGTGGTGTTCGACTGTAA  | NM_014012:    | NM_014012:                           |
| 5972   | REN            | renin                                                                   | 0.32  | CAGGAATCCTACAGTAGTAAA  | NM_000537:    | NM_000537:                           |
| 5972   | REN            | renin                                                                   | -1.86 | CAGCGCGGACTATGTATTTCA  | NM_000537:    | NM_000537:                           |
| 85004  | REERG          | RAS-like, estrogen-regulated, growth inhibitor                          | -0.20 | CTAGTAGAAGATGTAGAAATTA | NM_032918:    | NM_032918:                           |
| 85004  | REERG          | RAS-like, estrogen-regulated, growth inhibitor                          | 1.02  | CTGGTTTATGTTAAGCTATT   | NM_032918:    | NM_032918:                           |
| 5979   | RET            | ret proto-oncogene (multiple endocrine neoplasia and medullary thyr     | 1.12  | CAGGTCGGTATCCAGTTAAA   | NM_20975:     | NM_020630.NM_020975:                 |
| 5979   | RET            | ret proto-oncogene (multiple endocrine neoplasia and medullary thyr     | 0.90  | CCCAATGTCATCAAATTTGTA  | NM_20975:     | NM_020630.NM_020975:                 |
| 56729  | RETN           | resistin                                                                | -1.58 | CCCTAATATTTAGGCAATAA   | NM_020415:    | NM_020415:                           |
| 56729  | RETN           | resistin                                                                | -2.01 | CTCCATGGGAAGCCATCAA    | NM_020415:    | NM_020415:                           |
| 51455  | REV1L          | REV1-like (yeast)                                                       | 1.15  | AGGAGATATGTCAGTATTGAA  | NM_016316:    | NM_01037872.NM_016316:               |
| 51455  | REV1L          | REV1-like (yeast)                                                       | -4.03 | CAGCGCATCGTGGCCAAAGAA  | NM_016316:    | NM_01037872.NM_016316:               |
| 5980   | REV3L          | REV3-like, catalytic subunit of DNA polymerase zeta (yeast)             | 0.14  | ATGAGTATGGATCATAACAAA  | NM_002912:    | NM_002912:                           |
| 5980   | REV3L          | REV3-like, catalytic subunit of DNA polymerase zeta (yeast)             | 0.19  | CGGGATGATGTCAAACTGCAAA | NM_002912:    | NM_002912:                           |
| 5982   | RFC2           | replication factor C (activator 1) 2, 40kDa                             | -1.98 | AACCATGGAAATCTACTCTAAA | NM_002914:    | NM_002914.NM_181471:                 |
| 5982   | RFC2           | replication factor C (activator 1) 2, 40kDa                             | 0.26  | GAGGAGAACCATGGAAATCTA  | NM_002914:    | NM_002914.NM_181471:                 |
| 5984   | RFC4           | replication factor C (activator 1) 4, 37kDa                             | 0.25  | CAGAAGTCTATTATCACAGAAA | NM_002916:    | NM_002916.NM_181573:                 |
| 5984   | RFC4           | replication factor C (activator 1) 4, 37kDa                             | 0.57  | CGAATTCGTCTTATCTGTAAA  | NM_002916:    | NM_002916.NM_181573:                 |
| 117584 | RFLL           | ring finger and FYVE-like domain containing 1                           | -0.77 | TTGGTGAAGAAATGAAATACAA | NM_057178:    | NM_001017368.NM_057178:              |
| 117584 | RFLL           | ring finger and FYVE-like domain containing 1                           | 0.13  | ATCGGTTTCTTCAGTGCCTTA  | NM_057178:    | NM_001017368.NM_057178:              |
| 55312  | RFK            | riboflavin kinase                                                       | 0.72  | ACGATGTAATTTAATGCTAAA  | NM_018339:    | NM_018339:                           |
| 55312  | RFK            | riboflavin kinase                                                       | -0.07 | CACGATGTAATTTAATGCTAAA | NM_018339:    | NM_018339:                           |
| 5987   | RFP            | ret finger protein                                                      | 0.08  | CATGCAATGTTGAAATGTTAA  | NM_030950:    | NM_030950.NM_006510:                 |
| 5987   | RFP            | ret finger protein                                                      | -1.39 | TTGATCATGAGACACTCGAAA  | NM_030950:    | NM_030950.NM_006510:                 |
| 5988   | RFPL1          | ret finger protein-like 1                                               | -0.02 | TAGTTTATAAATGAGCTCTA   | NM_021026:    | NM_021026:                           |
| 5988   | RFPL1          | ret finger protein-like 1                                               | 0.88  | ACAATTCATGATTATACTTAA  | NM_021026:    | NM_021026:                           |
| 10739  | RFPL2          | ret finger protein-like 2                                               | 1.05  | CAAGTTCAAATTAATGATTA   | NM_006605:    | NM_006605:                           |
| 10739  | RFPL2          | ret finger protein-like 2                                               | 1.64  | CTGCAAGTTCAAATTAATGTA  | NM_006605:    | NM_006605:                           |
| 10738  | RFPL3 (ret fir | ret finger protein-like 3                                               | -0.03 | ATGGACATTTCTAATCTA     | NM_006604:    | NM_006604:                           |
| 10738  | RFPL3 (ret fir | ret finger protein-like 3                                               | 0.93  | TAAGTTCAAATCAATGTTTAA  | NM_006604:    | NM_006604:                           |
| 55159  | RFWD3          | ring finger and WD repeat domain 3                                      | 0.89  | AGGGACGTTATGTGAATCTTA  | NM_018124:    | NM_018124:                           |
| 55159  | RFWD3          | ring finger and WD repeat domain 3                                      | 0.22  | CTGAGTTGCTGCTGACTTAA   | NM_018124:    | NM_018124:                           |
| 5989   | RFX1           | regulatory factor X, 1 (influences HLA class II expression)             | 0.53  | CCGTGGGAAACTGTTAATCTA  | NM_002918:    | NM_002918:                           |
| 5989   | RFX1           | regulatory factor X, 1 (influences HLA class II expression)             | 1.77  | CACCGTTGGCATGGCAACACA  | NM_002918:    | NM_002918:                           |
| 5990   | RFX2           | regulatory factor X, 2 (influences HLA class II expression)             | -2.18 | CGCATTTCTAACGAAATGCA   | NM_000635:    | NM_000635.NM_134433:                 |
| 5990   | RFX2           | regulatory factor X, 2 (influences HLA class II expression)             | 0.52  | CTCACAGTTAACGGATTTGTA  | NM_000635:    | NM_000635.NM_134433:                 |
| 8625   | RFXANK         | regulatory factor X-associated ankyrin-containing protein               | 0.72  | AACAGGGGCTACACAGACAT   | NM_003721:    | NM_003721.NM_134440:                 |
| 8625   | RFXANK         | regulatory factor X-associated ankyrin-containing protein               | 0.17  | AACTGGTGTCTCAGTCTCTT   | NM_003721:    | NM_003721.NM_134440:                 |
| 57529  | RGAG1          | retrotransposon gag domain containing 1                                 | -7.33 | AAGGCCATACCAACAAGTAA   | NM_020769:    | NM_020769:                           |
| 57529  | RGAG1          | retrotransposon gag domain containing 1                                 | -4.79 | CAGGCATATATGACTCCCTTA  | NM_020769:    | NM_020769:                           |
| 5863   | RGL2           | rai guanine nucleotide dissociation stimulator-like 2                   | 0.50  | ATCCTGAATGGTGGCAATTAT  | NM_004761:    | NM_004761:                           |

|        |               |                                                                        |       |                         |            |                                          |
|--------|---------------|------------------------------------------------------------------------|-------|-------------------------|------------|------------------------------------------|
| 5863   | RGL2          | ral guanine nucleotide dissociation stimulator-like 2                  | 1.05  | CGGAACTTCTCTCAGTTTA     | NM_004761: | NM_004761:                               |
| 5995   | RGR (retinal) | retinal G protein coupled receptor                                     | -5.10 | AACCATCACCCCTAATAATATA  | NM_002921: | NM_002921:NM_01012722:NM_01012720:       |
| 5995   | RGR (retinal) | retinal G protein coupled receptor                                     | 0.50  | CACCATCAATGCCATCAACTATA | NM_002921: | NM_002921:NM_01012722:NM_01012720:       |
| 8786   | RGS11         | regulator of G-protein signalling 11                                   | 1.18  | AGCGTCCAGCACACAAATAAA   | NM_003834: | NM_183337:NM_003834:                     |
| 8786   | RGS11         | regulator of G-protein signalling 11                                   | 0.34  | CCCAAGTTCCTGAACTCTGA    | NM_003834: | NM_183337:NM_003834:                     |
| 6002   | RGS12         | regulator of G-protein signalling 12                                   | 0.28  | TAGGCAAGTCTAATCTTATTA   | NM_198430: | NM_198227:NM_198230:NM_002926:NM_198229: |
| 6002   | RGS12         | regulator of G-protein signalling 12                                   | -6.33 | CAGGACTTTGGCACCCGAGAA   | NM_198430: | NM_198430:                               |
| 6003   | RGS13         | regulator of G-protein signalling 13                                   | -0.69 | CCAGAGTGCCATCGAAGGTAA   | NM_144766: | NM_198587:NM_198227:NM_198230:NM_002926: |
| 6003   | RGS13         | regulator of G-protein signalling 13                                   | -0.22 | CACAGTGACGAGAAATTTCAA   | NM_144766: | NM_198229:NM_198430:                     |
| 10636  | RGS14 (regul) | regulator of G-protein signalling 14                                   | 0.57  | ACCACATAGACTATACGTGA    | NM_006480: | NM_144766:NM_002927:                     |
| 10636  | RGS14 (regul) | regulator of G-protein signalling 14                                   | -1.31 | CCCAGTGAACATCGACCGTCA   | NM_006480: | NM_006480:                               |
| 6004   | RGS16         | regulator of G-protein signalling 16                                   | 0.81  | CAGCATGTTATATCTTATAA    | NM_002928: | NM_006480:                               |
| 6004   | RGS16         | regulator of G-protein signalling 16                                   | -0.65 | TGGGAGATTTTATACCTCAA    | NM_002928: | NM_002928:                               |
| 26575  | RGS17         | regulator of G-protein signalling 17                                   | -0.48 | AGGGCTGAGATGGGAATAAAA   | NM_012419: | NM_012419:                               |
| 26575  | RGS17         | regulator of G-protein signalling 17                                   | 0.11  | TAGGATGATATATGAGGATA    | NM_012419: | NM_012419:                               |
| 10287  | RGS19         | regulator of G-protein signalling 19                                   | 1.50  | TTATATGTTGATGAACCTTAA   | NM_005873: | NM_005873:                               |
| 10287  | RGS19         | regulator of G-protein signalling 19                                   | 0.00  | GCGGGAGGGCATCAACAAGAA   | NM_005873: | NM_005873:                               |
| 5997   | RGS2          | regulator of G-protein signalling 2, 24kDa                             | 0.76  | CTCATGTCATGAAATGTAA     | NM_002923: | NM_002923:                               |
| 5997   | RGS2          | regulator of G-protein signalling 2, 24kDa                             | -0.41 | CTCACTGTGTACAGAAGCGAA   | NM_002923: | NM_002923:                               |
| 8601   | RGS20         | regulator of G-protein signalling 20                                   | -1.22 | CTGCTATATATACCATGTA     | NM_003702: | NM_170587:NM_003702:                     |
| 8601   | RGS20         | regulator of G-protein signalling 20                                   | 0.79  | CACATATCGATGATGCTCAA    | NM_003702: | NM_170587:NM_003702:                     |
| 5998   | RGS3          | regulator of G-protein signalling 3                                    | 0.71  | CGCGTTGACCAAGTTCCTTAA   | NM_130795: | NM_144488:NM_021106:NM_130795:NM_144489: |
| 5998   | RGS3          | regulator of G-protein signalling 3                                    | -0.22 | CAGACGGATAGACATACGGAA   | NM_130795: | NM_134427:                               |
| 5999   | RGS4          | regulator of G-protein signalling 4                                    | -0.29 | CTGAGACTAATGAGAGGAAA    | NM_005613: | NM_005613:                               |
| 5999   | RGS4          | regulator of G-protein signalling 4                                    | 0.31  | GTACGTGTTATTTATTATATA   | NM_005613: | NM_005613:                               |
| 8490   | RGS5          | regulator of G-protein signalling 5                                    | -0.19 | ACAGGCTAAGGCATAGACAAA   | NM_003617: | NM_003617:                               |
| 8490   | RGS5          | regulator of G-protein signalling 5                                    | 0.52  | AACGAGAGCAATGACTATTTA   | NM_003617: | NM_003617:                               |
| 9628   | RGS6          | regulator of G-protein signalling 6                                    | 0.53  | ATCGACAGACATTTGTTGAAA   | NM_004296: | NM_004296:                               |
| 9628   | RGS6          | regulator of G-protein signalling 6                                    | -0.51 | CACGACTCATCTTGAGATTA    | NM_004296: | NM_004296:                               |
| 6000   | RGS7 (regula) | regulator of G-protein signalling 7                                    | -4.09 | ACGGATCATCTTGATGATGA    | NM_002924: | NM_002924:                               |
| 6000   | RGS7 (regula) | regulator of G-protein signalling 7                                    | 0.33  | AAGTATATATCAATAAGTATA   | NM_002924: | NM_002924:                               |
| 85397  | RGS8          | regulator of G-protein signalling 8                                    | -0.09 | AAGATCATATTTCAATGTGAA   | NM_033345: | NM_033345:                               |
| 85397  | RGS8          | regulator of G-protein signalling 8                                    | -1.20 | ACAGCTATTCTCCAGACAAA    | NM_033345: | NM_033345:                               |
| 8787   | RGS9          | regulator of G-protein signalling 9                                    | 1.04  | CTGACACCAAGTTTCAAAATTA  | NM_003835: | NM_003835:                               |
| 8787   | RGS9          | regulator of G-protein signalling 9                                    | 1.73  | CAAAATAGGTTTGAACGTGA    | NM_003835: | NM_003835:                               |
| 6005   | RHAG          | Rh-associated glycoprotein                                             | 0.11  | TTGCAACGAGCTCAAATGCTA   | NM_000324: | NM_000324:                               |
| 6005   | RHAG          | Rh-associated glycoprotein                                             | -1.66 | CAGTGAGTAAATACAGAGTAA   | NM_000324: | NM_000324:                               |
| 25807  | RHBDD3        | rhomboid domain containing 3                                           | 0.11  | CTAGTACGTGTTAGAATAAA    | NM_012265: | NM_012265:                               |
| 25807  | RHBDD3        | rhomboid domain containing 3                                           | -1.37 | CCCAGCTCCTACTCTGTCTA    | NM_012265: | NM_012265:                               |
| 64285  | RHBDP1        | rhomboid 5 homolog 1 (Drosophila)                                      | -0.02 | CCAGCTCATGTGGCCAAATAA   | NM_022450: | NM_022450:                               |
| 64285  | RHBDP1        | rhomboid 5 homolog 1 (Drosophila)                                      | 0.10  | CGGGCTTTTATATACTACTT    | NM_022450: | NM_022450:                               |
| 6010   | RHO           | rhodopsin (opsin 2, rod pigment) (retinitis pigmentosa 4, autosomal dc | -1.24 | CACGCTCAAGCCGAGGTCAAA   | NM_000539: | NM_000539:                               |
| 6010   | RHO           | rhodopsin (opsin 2, rod pigment) (retinitis pigmentosa 4, autosomal dc | 0.10  | CTCGTGTGGAATCGACTACTA   | NM_000539: | NM_000539:                               |
| 387    | RHOA          | ras homolog gene family, member A                                      | -1.01 | TAGGCTGAAGTAACTTTATAA   | NM_001664: | NM_001664:                               |
| 387    | RHOA          | ras homolog gene family, member A                                      | -2.14 | TACCTTAGTACTCTGTGATA    | NM_001664: | NM_001664:                               |
| 388    | RHOB          | ras homolog gene family, member B                                      | 0.74  | CACAATTGTTTCATTGTTTGA   | NM_004040: | NM_004040:                               |
| 388    | RHOB          | ras homolog gene family, member B                                      | 1.29  | CCCAGTGGTACTTCTACTAAA   | NM_004040: | NM_004040:                               |
| 389    | RHOC          | ras homolog gene family, member C                                      | 0.11  | CACCATGGCTGCAATCCGAAA   | NM_175744: | NM_175744:                               |
| 389    | RHOC          | ras homolog gene family, member C                                      | -1.42 | CCCTACTGTCTTTGAGAATA    | NM_175744: | NM_175744:                               |
| 57381  | RHOJ          | ras homolog gene family, member J                                      | 0.04  | CCCATTATAAGAGACATGA     | NM_020663: | NM_020663:                               |
| 57381  | RHOJ          | ras homolog gene family, member J                                      | 0.05  | ACCAAATTAGCCTAAGACAAA   | NM_020663: | NM_020663:                               |
| 58480  | RHOU          | ras homolog gene family, member U                                      | -0.25 | ACCCAGTTACTTATGATTTAA   | NM_021205: | NM_021205:                               |
| 58480  | RHOU          | ras homolog gene family, member U                                      | -1.55 | CCCAGGTATTACACAAGCCAA   | NM_021205: | NM_021205:                               |
| 9743   | RICS          | Rho GTPase-activating protein                                          | -0.11 | ACCGCTGTAAGTCTTATGATA   | NM_014715: | NM_014715:                               |
| 9743   | RICS          | Rho GTPase-activating protein                                          | 0.05  | CCCGCTCAGATTATCATGTCA   | NM_014715: | NM_014715:                               |
| 6015   | RING1         | ring finger protein 1                                                  | -1.20 | CAGCCAATAAGAGGACACAAA   | NM_002931: | NM_002931:                               |
| 6015   | RING1         | ring finger protein 1                                                  | -1.61 | CTGGAGCTGGTGAATGAGAAA   | NM_002931: | NM_002931:                               |
| 83732  | RIOK1         | RIO kinase 1 (yeast)                                                   | 1.65  | GCACAACAAGATAAATTTCTA   | NM_031480: | NM_031480:NM_153005:                     |
| 83732  | RIOK1         | RIO kinase 1 (yeast)                                                   | -0.73 | TACCATGTCCAGAACCAATAA   | NM_031480: | NM_031480:NM_153005:                     |
| 55781  | RIOK2         | RIO kinase 2 (yeast)                                                   | 0.97  | AACGCGATTATCATAAACATA   | NM_018343: | NM_018343:                               |
| 55781  | RIOK2         | RIO kinase 2 (yeast)                                                   | -0.24 | CGCGGTTGAAATGGGCATGAA   | NM_018343: | NM_018343:                               |
| 8780   | RIOK3         | RIO kinase 3 (yeast)                                                   | -0.14 | ATGCGGCGAGTTATATCATGAA  | NM_003831: | NM_003831:NM_145906:                     |
| 8780   | RIOK3         | RIO kinase 3 (yeast)                                                   | -2.62 | CTGCGTGTATTAGTACAGAAA   | NM_003831: | NM_003831:NM_145906:                     |
| 8737   | RIPK1         | receptor (TNFRSF)-interacting serine-threonine kinase 1                | -0.56 | CGGACATTTCTGGCATTGAA    | NM_003804: | NM_003804:                               |
| 8737   | RIPK1         | receptor (TNFRSF)-interacting serine-threonine kinase 1                | -0.07 | TACCCTAGTCTGACGGATAA    | NM_003804: | NM_003804:                               |
| 8767   | RIPK2         | receptor-interacting serine-threonine kinase 2                         | 1.58  | ACGTATGATCTCTAATAGA     | NM_003821: | NM_003821:                               |
| 8767   | RIPK2         | receptor-interacting serine-threonine kinase 2                         | 0.03  | CACAAGGACATCGACCTGTTA   | NM_003821: | NM_003821:                               |
| 11035  | RIPK3         | receptor-interacting serine-threonine kinase 3                         | 0.48  | ACCGCTCGTTAACATATACAA   | NM_006871: | NM_006871:                               |
| 11035  | RIPK3         | receptor-interacting serine-threonine kinase 3                         | -0.03 | CAGCCTGATGTCGTGGCTCAA   | NM_006871: | NM_006871:                               |
| 54101  | RIPK4         | receptor-interacting serine-threonine kinase 4                         | -0.66 | AAGCCTGATGACGAAGTGA     | NM_020639: | NM_020639:                               |
| 54101  | RIPK4         | receptor-interacting serine-threonine kinase 4                         | -0.22 | CACACCGAGTATGAAGATAAA   | NM_020639: | NM_020639:                               |
| 25778  | RIPK5         | receptor-interacting protein kinase 5                                  | 1.44  | TAGAGCTTGTGATGTTAAA     | NM_015375: | NM_015375:                               |
| 25778  | RIPK5         | receptor-interacting protein kinase 5                                  | 0.71  | TTGCTTCATCGTAAACCTAAA   | NM_015375: | NM_199462:NM_015375:                     |
| 25907  | RIS1          | Ras-induced senescence 1                                               | -2.33 | GCCGGTGTGCTTGGCTGTGA    | NM_015444: | NM_015444:                               |
| 25907  | RIS1          | Ras-induced senescence 1                                               | -2.42 | CCGCTGCATTTCTGCTGCCTA   | NM_015444: | NM_015444:                               |
| 51320  | RKHD2         | ring finger and KH domain containing 2                                 | 0.20  | TAGGCTAAGTGTATTGATAA    | NM_016626: | NM_016626:                               |
| 51320  | RKHD2         | ring finger and KH domain containing 2                                 | 1.45  | CCGCGCAAGAATGATATCCAA   | NM_016626: | NM_016626:                               |
| 84206  | RKHD3         | ring finger and KH domain containing 3                                 | 0.93  | CCACTGTTTATGTATATGTA    | NM_032246: | NM_032246:                               |
| 84206  | RKHD3         | ring finger and KH domain containing 3                                 | 0.81  | CACAACGGAACAATAACAAAT   | NM_032246: | NM_032246:                               |
| 6017   | RLBP1         | retinaldehyde binding protein 1                                        | -0.41 | TACGACTTAGAGTCTGTGAAA   | NM_000326: | NM_000326:                               |
| 6017   | RLBP1         | retinaldehyde binding protein 1                                        | -0.03 | TTGTGTAAGTGTGATTTCAA    | NM_000326: | NM_000326:                               |
| 117579 | RLN3          | relaxin 3                                                              | -1.63 | CCGGATGCAGATGCTGATGAA   | NM_080864: | NM_080864:                               |
| 117579 | RLN3          | relaxin 3                                                              | -1.92 | CCCGGTGGAGACGATCAGACA   | NM_080864: | NM_080864:                               |
| 51289  | RLN3R1        | relaxin 3 receptor 1                                                   | -0.09 | CACGATAGCCACCATGAATAA   | NM_016568: | NM_016568:                               |
| 51289  | RLN3R1        | relaxin 3 receptor 1                                                   | -1.76 | CTGGCGAAGTCCCTCTATCAA   | NM_016568: | NM_016568:                               |
| 339403 | RLN3R2        | relaxin 3 receptor 2                                                   | -0.31 | CCGATGCCTGTCAAAATCTCA   | NM_181885: | NM_181885:                               |
| 339403 | RLN3R2        | relaxin 3 receptor 2                                                   | 1.37  | CAGGCGGTGGTCCGCAAGCAA   | NM_181885: | NM_181885:                               |
| 6041   | RNASEL        | ribonuclease L (2',5'-oligoadenylate synthetase-dependent)             | 0.13  | CACCTGGACATGTCAATATAA   | NM_021133: | NM_021133:                               |
| 6041   | RNASEL        | ribonuclease L (2',5'-oligoadenylate synthetase-dependent)             | 0.02  | CCAGACTACACTAGTCCATAA   | NM_021133: | NM_021133:                               |
| 9921   | RNF10         | ring finger protein 10                                                 | -1.99 | CAGGATTGAGATAGAGGAGAA   | NM_014868: | NM_014868:                               |
| 9921   | RNF10         | ring finger protein 10                                                 | -0.01 | TTCGATGAAGAAACACCGGAA   | NM_014868: | NM_014868:                               |
| 7844   | RNF103        | ring finger protein 103                                                | 1.66  | CTAGCAAGACTTTTCAAGATA   | NM_005667: | NM_005667:                               |
| 7844   | RNF103        | ring finger protein 103                                                | 0.48  | AAGCGATTTGGTCTTCATA     | NM_005667: | NM_005667:                               |
| 26994  | RNF11         | ring finger protein 11                                                 | 1.39  | TAGATTATCAGGTTCTGTTAA   | NM_014372: | NM_014372:                               |
| 26994  | RNF11         | ring finger protein 11                                                 | 1.50  | ATGAAAGACTTAAAGATGAA    | NM_014372: | NM_014372:                               |

|        |              |                                            |       |                        |            |                                          |
|--------|--------------|--------------------------------------------|-------|------------------------|------------|------------------------------------------|
| 54778  | RNF111       | ring finger protein 111                    | -0.46 | AAGAGCATACCTATGATTA    | NM_017610: | NM_017610:                               |
| 54778  | RNF111       | ring finger protein 111                    | -0.04 | CCAAGCCTTGATAATTGAA    | NM_017610: | NM_017610:                               |
| 7737   | RNF113A      | ring finger protein 113A                   | -3.76 | TAGGTTCCCAATAATCTTAA   | NM_006978: | NM_006978:                               |
| 7737   | RNF113A      | ring finger protein 113A                   | 2.59  | AGCGAAAGAATTGATTGTAA   | NM_006978: | NM_006978:                               |
| 140432 | RNF113B      | ring finger protein 113B                   | -4.74 | AAGATCACATGCTACAACATA  | NM_178861: | NM_178861:                               |
| 140432 | RNF113B      | ring finger protein 113B                   | 0.01  | AACGGGAAGAAATCCTCTTA   | NM_178861: | NM_178861:                               |
| 51132  | RNF12        | ring finger protein 12                     | 0.04  | TAGCACAAGTTAAATTTACAA  | NM_016120: | NM_183353:NM_016120:                     |
| 51132  | RNF12        | ring finger protein 12                     | 1.36  | CAGACAAAACCTGGTTTCATA  | NM_016120: | NM_183353:NM_016120:                     |
| 55298  | RNF121       | ring finger protein 121                    | 1.35  | TAACCTTATTATCAAGATCAA  | NM_018320: | NM_018320:NM_194453:                     |
| 55298  | RNF121       | ring finger protein 121                    | 1.79  | TGGTCTTAACTTATTATTCAA  | NM_018320: | NM_018320:NM_194453:                     |
| 79845  | RNF122       | ring finger protein 122                    | 0.51  | CTAGTCTTACTTAAATTTGA   | NM_024787: | NM_024787:                               |
| 79845  | RNF122       | ring finger protein 122                    | 0.37  | AGGGCTAGTCTTACTTAA     | NM_024787: | NM_024787:                               |
| 63891  | RNF123       | ring finger protein 123                    | 0.00  | CAGGGCCACAGTGAGCATTAA  | NM_022064: | NM_022064:                               |
| 63891  | RNF123       | ring finger protein 123                    | -0.67 | CTCGCTACTATTGGGATGAA   | NM_022064: | NM_022064:                               |
| 54941  | RNF125       | ring finger protein 125                    | -1.45 | ATGGTTAGGCACGATAACTAA  | NM_017831: | NM_017831:                               |
| 54941  | RNF125       | ring finger protein 125                    | 0.56  | CTCGGTTGCAAAATAGATAA   | NM_017831: | NM_017831:                               |
| 55658  | RNF126       | ring finger protein 126                    | -0.58 | TACACTACTTCAAAAGAGAAA  | NM_017876: | NM_194460:NM_017876:                     |
| 55658  | RNF126       | ring finger protein 126                    | -0.01 | CGGATTATATCTGTCCAAGA   | NM_017876: | NM_194460:NM_017876:                     |
| 11342  | RNF13        | ring finger protein 13                     | 0.28  | CAGAACTAATGATGTATTGAA  | NM_007282: | NM_183382:NM_183383:NM_183384:NM_183381: |
| 11342  | RNF13        | ring finger protein 13                     | 0.36  | TTGGAATGAAAGTATAGCCAA  | NM_007282: | NM_007282:                               |
| 55819  | RNF130       | ring finger protein 130                    | 1.49  | TCCGAGAACAGGAGAAATCAA  | NM_018434: | NM_018434:                               |
| 55819  | RNF130       | ring finger protein 130                    | 0.06  | CAAGCTGTAAACCGAAGATCA  | NM_018434: | NM_018434:                               |
| 168433 | RNF133       | ring finger protein 133                    | 0.10  | AACGCTATAAGCCATATGACA  | NM_139175: | NM_139175:                               |
| 168433 | RNF133       | ring finger protein 133                    | -4.34 | ACCGGAGATGGCAGCGATTAA  | NM_139175: | NM_139175:                               |
| 84282  | RNF135       | ring finger protein 135                    | -2.14 | CTCCTGGGAGATAACCTCTAA  | NM_032322: | NM_032322:NM_197939:                     |
| 84282  | RNF135       | ring finger protein 135                    | 0.00  | CAAGCTGAGGAGACTAAGTTA  | NM_032322: | NM_032322:NM_197939:                     |
| 379013 | RNF138P1 (ri | ring finger protein 138 pseudogene 1       | 0.43  | AAGGTGTACCACGGTTGTAAA  | NM_022731: | NR_001575:                               |
| 11236  | RNF139       | ring finger protein 139                    | 1.00  | TCGGTTTACTGTGATGTGCTA  | NM_007218: | NM_007218:                               |
| 11236  | RNF139       | ring finger protein 139                    | 1.38  | AAGGGAGCCGCTTACAAGAAA  | NM_007218: | NM_007218:                               |
| 9604   | RNF14        | ring finger protein 14                     | -0.35 | CGGGATATTTAGGGTACTATT  | NM_004290: | NM_004290:NM_183398:NM_183399:NM_183400: |
| 9604   | RNF14        | ring finger protein 14                     | 0.53  | AGCAGAGTTATTTGCCCGTTA  | NM_004290: | NM_183401:                               |
| 50862  | RNF141       | ring finger protein 141                    | 0.63  | CTCGATTCCCTTATATCTAAT  | NM_016422: | NM_016422:                               |
| 50862  | RNF141       | ring finger protein 141                    | -1.14 | CACGTATAAATGTGCAATAAA  | NM_016422: | NM_016422:                               |
| 9781   | RNF144       | ring finger protein 144                    | 1.13  | CAGGAATAACTGTCCAATAA   | NM_014746: | NM_014746:                               |
| 9781   | RNF144       | ring finger protein 144                    | 2.91  | GTGGAGAAAGTGATTTCTTAA  | NM_014746: | NM_014746:                               |
| 81847  | RNF146       | ring finger protein 146                    | 0.63  | TGGCATAAGACCATTACTAAA  | NM_030963: | NM_030963:                               |
| 81847  | RNF146       | ring finger protein 146                    | 1.33  | CTGATGGACAGTGACAGTAA   | NM_030963: | NM_030963:                               |
| 284996 | RNF149       | ring finger protein 149                    | 0.74  | TAGAGTTTAAAGCAGATTAA   | NM_173647: | NM_173647:                               |
| 284996 | RNF149       | ring finger protein 149                    | -0.57 | CCCATCTGTAGTGTATGTGAA  | NM_173647: | NM_173647:                               |
| 57484  | RNF150       | ring finger protein 150                    | -1.28 | CCGGAACGGCTTCCCTGAGAAA | XM_371709: | NM_020724:                               |
| 146310 | RNF151       | ring finger protein 151                    | -5.43 | TCGGTGGCTAGCCAGACAAA   | XM_370927: | XM_370927:                               |
| 146310 | RNF151       | ring finger protein 151                    | 0.45  | AAGGTTGCCACATGAATAAA   | XM_370927: | XM_370927:                               |
| 114804 | RNF157 (ring | ring finger protein 157                    | 0.58  | TCGGGTAGCCATCACCATCTA  | XM_290732: | NM_052916:                               |
| 114804 | RNF157 (ring | ring finger protein 157                    | -0.71 | AAGCGTGAAGCACTGGACAAA  | XM_290732: | NM_052916:                               |
| 115992 | RNF166       | ring finger protein 166                    | -1.48 | CAGTTACTCTCATATTGCAAA  | NM_178841: | NM_178841:                               |
| 115992 | RNF166       | ring finger protein 166                    | -0.15 | CTGGTGAAGCACTGTGGAAA   | NM_178841: | NM_178841:                               |
| 26001  | RNF167       | ring finger protein 167                    | 0.10  | CTGGATCCCGCTGTATTTTAA  | NM_015528: | NM_015528:                               |
| 26001  | RNF167       | ring finger protein 167                    | -1.89 | ATGGTGTGGAATAGTAGGAAA  | NM_015528: | NM_015528:                               |
| 81790  | RNF170       | ring finger protein 170                    | 1.33  | ATACCTCGATATCATATCTTA  | NM_030954: | NM_030954:                               |
| 81790  | RNF170       | ring finger protein 170                    | 1.44  | CAGCAGTACCTATATGATAA   | NM_030954: | NM_030954:                               |
| 221687 | RNF182       | ring finger protein 182                    | -0.21 | AAACCCATTACTAATGATTTAA | NM_152737: | NM_152737:                               |
| 221687 | RNF182       | ring finger protein 182                    | 0.99  | AAGACTTTGTGTGTAGTCTA   | NM_152737: | NM_152737:                               |
| 138065 | RNF183       | ring finger protein 183                    | 1.63  | AAGTGTCTGTATTCTAATAA   | NM_145051: | NM_145051:                               |
| 138065 | RNF183       | ring finger protein 183                    | -0.17 | GAGCTTCAATCTGTGGGTTAA  | NM_145051: | NM_145051:                               |
| 91445  | RNF185       | ring finger protein 185                    | -1.54 | CTGAATCTTATTGAGGGACTA  | NM_152267: | NM_152267:                               |
| 91445  | RNF185       | ring finger protein 185                    | 0.09  | ACCACCATCCTCAGAAGCCAA  | NM_152267: | NM_152267:                               |
| 54546  | RNF186       | ring finger protein 186                    | 1.20  | TAGAATGAAGCTGGAATTTCCA | NM_019062: | NM_019062:                               |
| 54546  | RNF186       | ring finger protein 186                    | 1.68  | TGCAGTATTGATGCCATTGTA  | NM_019062: | NM_019062:                               |
| 25897  | RNF19        | ring finger protein 19                     | 1.94  | AACCTCAATGATAGCAGTTAA  | NM_015435: | NM_015435:NM_183419:                     |
| 25897  | RNF19        | ring finger protein 19                     | 3.17  | CAGGCTTTAGTAATAACTTT   | NM_015435: | NM_015435:NM_183419:                     |
| 6045   | RNF2         | ring finger protein 2                      | -0.11 | GAGAGTTATTTGTGACTATAA  | NM_007212: | NM_007212:                               |
| 6045   | RNF2         | ring finger protein 2                      | 0.69  | TTGGTTGCCACATCAGTTTA   | NM_007212: | NM_007212:                               |
| 56254  | RNF20        | ring finger protein 20                     | 1.12  | CAGGAACCTTATTCATTAACCA | NM_019592: | NM_019592:                               |
| 56254  | RNF20        | ring finger protein 20                     | 0.84  | ACGGGTGAATCCAAAGGTTA   | NM_019592: | NM_019592:                               |
| 11237  | RNF24        | ring finger protein 24                     | -0.09 | ACCTGCTATCAAATCATCTAA  | NM_007219: | NM_007219:                               |
| 11237  | RNF24        | ring finger protein 24                     | -0.90 | CTGGGGTTTGGCTCAAGAAA   | NM_007219: | NM_007219:                               |
| 64320  | RNF25        | ring finger protein 25                     | 0.19  | CAAGGAGCCCATGGACCTAAA  | NM_022453: | NM_022453:                               |
| 64320  | RNF25        | ring finger protein 25                     | 1.51  | TGGGGAAACCCAGAAAGCTA   | NM_022453: | NM_022453:                               |
| 79102  | RNF26        | ring finger protein 26                     | -0.38 | CACATGGGTCCAAATACAGAAA | NM_032015: | NM_032015:                               |
| 79102  | RNF26        | ring finger protein 26                     | 1.61  | TCGGATGATCTTAAACCTTTG  | NM_032015: | NM_032015:                               |
| 55072  | RNF31        | ring finger protein 31                     | 1.17  | CAGGACAATAACGCTCATGTTT | NM_017999: | NM_017999:                               |
| 55072  | RNF31        | ring finger protein 31                     | -1.34 | ACGCATGAAACGCCAGAATA   | NM_017999: | NM_017999:                               |
| 140545 | RNF32        | ring finger protein 32                     | -0.05 | TTCAAGTGTATTCAACATCAA  | NM_030936: | NM_030936:                               |
| 140545 | RNF32        | ring finger protein 32                     | -0.04 | CCGCTAATAGTCTGCTCTAAA  | NM_030936: | NM_030936:                               |
| 80196  | RNF34        | ring finger protein 34                     | 0.49  | CACITTTATAGTCATGATAT   | NM_025126: | NM_025126:NM_194271:                     |
| 80196  | RNF34        | ring finger protein 34                     | 0.51  | CGGCACAGGTACAAGTGAAA   | NM_025126: | NM_025126:NM_194271:                     |
| 140691 | RNF36        | ring finger protein 36                     | 0.22  | ATGAGTCATAATATTATACAA  | NM_080745: | NM_080745:NM_182985:                     |
| 140691 | RNF36        | ring finger protein 36                     | 0.12  | AAGGAACCAAACTGATCTAAA  | NM_080745: | NM_080745:NM_182985:                     |
| 152006 | RNF38        | ring finger protein 38                     | -3.85 | GAGAGGGTTGTGGTAATAAAA  | NM_022781: | NM_194331:NM_194332:NM_194339:NM_194330: |
| 152006 | RNF38        | ring finger protein 38                     | 0.50  | ACGTGTGATGAGATCCTATA   | NM_022781: | NM_022781:NM_194328:                     |
| 80352  | RNF39        | ring finger protein 39                     | 0.65  | TTGACGAGTATTAATAGCAA   | NM_025236: | NM_025236:NM_170769:NM_170770:           |
| 80352  | RNF39        | ring finger protein 39                     | 0.09  | CCCAACATCCAAAGTCATCTAA | NM_025236: | NM_025236:NM_170769:                     |
| 9810   | RNF40        | ring finger protein 40                     | -3.45 | AAGCGGAAGCTTCGAGAAGTA  | NM_014771: | NM_014771:NM_194352:                     |
| 9810   | RNF40        | ring finger protein 40                     | -0.56 | GCGCATCGAGTTTGAGCAGAA  | NM_014771: | NM_014771:NM_194352:                     |
| 54894  | RNF43        | ring finger protein 43                     | -0.65 | CAGGCACACTGTTAAGAATAA  | NM_017763: | NM_017763:                               |
| 54894  | RNF43        | ring finger protein 43                     | 1.23  | CAGGCATTATCCCATTTGGAAA | NM_017763: | NM_017763:                               |
| 6049   | RNF6         | ring finger protein (C3H2C3 type) 6        | -1.77 | AGGGTCTAACATAGCAACAAA  | NM_005977: | NM_183043:NM_005977:NM_183044:           |
| 6049   | RNF6         | ring finger protein (C3H2C3 type) 6        | 1.05  | CGGGATAGTATTGCAAAATAGA | NM_005977: | NM_183043:NM_005977:NM_183044:           |
| 9616   | RNF7         | ring finger protein 7                      | 0.58  | CCAGTGAACAGGGTAAATAAA  | NM_014245: | NM_014245:NM_183063:NM_183237:           |
| 9616   | RNF7         | ring finger protein 7                      | 1.35  | GGCCAGATGATATAATTTTAA  | NM_014245: | NM_014245:NM_183063:NM_183237:           |
| 8732   | RNGTT        | RNA guanylyltransferase and 5'-phosphatase | -0.04 | CAGGGTTGTAAGTTGTACTA   | NM_003800: | NM_003800:                               |
| 8732   | RNGTT        | RNA guanylyltransferase and 5'-phosphatase | -0.69 | CGGGATTTCTATATGGACATA  | NM_003800: | NM_003800:                               |
| 6051   | RNPEP        | arginyl aminopeptidase (aminopeptidase B)  | -1.50 | CACCAGGAAGATTCTGGAAA   | NM_020216: | NM_020216:                               |

|        |             |                                                                     |        |                        |            |                                          |
|--------|-------------|---------------------------------------------------------------------|--------|------------------------|------------|------------------------------------------|
| 6051   | RNPEP       | arginyl aminopeptidase (aminopeptidase B)                           | -2.98  | CTGGACATGAAGGCCATTGAA  | NM_020216: | NM_020216:                               |
| 57140  | RNPEPL1     | arginyl aminopeptidase (aminopeptidase B)-like 1                    | 0.36   | CGGGCAGGGCTGGGAATTGCA  | NM_018226: | NM_018226:                               |
| 57140  | RNPEPL1     | arginyl aminopeptidase (aminopeptidase B)-like 1                    | -4.67  | CCGAGCCTATGTGGAGAAGTA  | NM_018226: | NM_018226:                               |
| 10073  | RNUT1       | RNA, U transporter 1                                                | 1.26   | CAGATCCACAATGTAATAATA  | NM_005701: | NM_005701:                               |
| 10073  | RNUT1       | RNA, U transporter 1                                                | 0.01   | CAGGCGAAACTAACACGAAA   | NM_005701: | NM_005701:                               |
| 6091   | ROBO1       | roundabout, axon guidance receptor, homolog 1 (Drosophila)          | -2.93  | CTGGCTTTATCGACACCGCAA  | NM_002941: | NM_133631.NM_002941:                     |
| 6091   | ROBO1       | roundabout, axon guidance receptor, homolog 1 (Drosophila)          | -0.04  | ATGACACATGACGCCAGATAA  | NM_002941: | NM_133631.NM_002941:                     |
| 6092   | ROBO2       | roundabout, axon guidance receptor, homolog 2 (Drosophila)          | 1.46   | CACATTCAAAGCAATAATCAA  | XM_031246: | NM_002942:                               |
| 6092   | ROBO2       | roundabout, axon guidance receptor, homolog 2 (Drosophila)          | 0.06   | CACGAGCTTGGCAGTAAATAA  | XM_031246: | NM_002942:                               |
| 64221  | ROBO3       | roundabout, axon guidance receptor, homolog 3 (Drosophila)          | -0.64  | CCGGAGCAGCAGATATTACAA  | NM_022370: | NM_022370:                               |
| 64221  | ROBO3       | roundabout, axon guidance receptor, homolog 3 (Drosophila)          | -0.10  | CCACCTGAGACTTGTTTATAA  | NM_022370: | NM_022370:                               |
| 54538  | ROBO4       | roundabout homolog 4, magic roundabout (Drosophila)                 | -3.53  | CTCCTGTAGATTACTCCTGAA  | NM_019055: | NM_019055:                               |
| 54538  | ROBO4       | roundabout homolog 4, magic roundabout (Drosophila)                 | -1.20  | CACCTCAGGAAGTGACTCTAA  | NM_019055: | NM_019055:                               |
| 6093   | ROCK1       | Rho-associated, coiled-coil containing protein kinase 1             | 0.63   | AACGGTTAGAACAAGAGGTAA  | NM_005406: | NM_005406:                               |
| 6093   | ROCK1       | Rho-associated, coiled-coil containing protein kinase 1             | 0.06   | CAAGCTCGAATTCACCTTTA   | NM_005406: | NM_005406:                               |
| 9475   | ROCK2       | Rho-associated, coiled-coil containing protein kinase 2             | -0.08  | AAGCTACATGGAGCTTAAA    | NM_004850: | NM_004850:                               |
| 9475   | ROCK2       | Rho-associated, coiled-coil containing protein kinase 2             | -12.17 | ATGCACTTGATAAAGCCATA   | NM_004850: | NM_004850:                               |
| 9991   | ROD1        | ROD1 regulator of differentiation 1 (S. pombe)                      | -0.43  | AAGTCTGACCCTGTAGGAAA   | NM_005156: | NM_005156:                               |
| 9991   | ROD1        | ROD1 regulator of differentiation 1 (S. pombe)                      | -0.50  | CAGCCTTAATGTGAAATATAA  | NM_005156: | NM_005156:                               |
| 6094   | ROM1        | retinal outer segment membrane protein 1                            | -1.28  | CAGAGCAATGTGAAAGGCCTA  | NM_000327: | NM_000327:                               |
| 6094   | ROM1        | retinal outer segment membrane protein 1                            | 0.14   | CTGGAGGCTGATTTGATATA   | NM_000327: | NM_000327:                               |
| 54763  | ROPN1       | ropporin, rhophilin associated protein 1                            | 0.55   | TACACACTAATAAACAAITTA  | NM_017578: | NM_017578:                               |
| 54763  | ROPN1       | ropporin, rhophilin associated protein 1                            | 0.16   | AGGATAGCAATTTATCTCAA   | NM_017578: | NM_017578:                               |
| 4919   | ROR1        | receptor tyrosine kinase-like orphan receptor 1                     | 0.37   | CCCAGTGAGTAATCTCAGTAA  | NM_005012: | NM_005012:                               |
| 4919   | ROR1        | receptor tyrosine kinase-like orphan receptor 1                     | -2.61  | CCGTACTGCGATGAAACTTCA  | NM_005012: | NM_005012:                               |
| 4920   | ROR2        | receptor tyrosine kinase-like orphan receptor 2                     | -6.00  | CCGGTTGGGAAAGTCTACAA   | NM_004560: | NM_004560:                               |
| 4920   | ROR2        | receptor tyrosine kinase-like orphan receptor 2                     | 0.15   | CTGGTCTTACCGAGAATAA    | NM_004560: | NM_004560:                               |
| 6095   | RORA        | RAR-related orphan receptor A                                       | -2.27  | CACCGAGAAGATGGAATACTA  | NM_002943: | NM_002943.NM_134262.NM_134261.NM_134260: |
| 6095   | RORA        | RAR-related orphan receptor A                                       | -0.36  | CCGACGCTCTCAAACTCCTTA  | NM_002943: | NM_002943.NM_134262.NM_134261.NM_134260: |
| 6096   | RORB        | RAR-related orphan receptor B                                       | -0.26  | CAGGCTCTCTTCTATGATTTA  | NM_006914: | NM_006914:                               |
| 6096   | RORB        | RAR-related orphan receptor B                                       | 0.16   | CCTGTTGATTGTTCAAATATA  | NM_006914: | NM_006914:                               |
| 6097   | RORC        | RAR-related orphan receptor C                                       | -0.03  | CGGGTTCATCTGAGTAAACAT  | NM_005060: | NM_001001523.NM_005060:                  |
| 6097   | RORC        | RAR-related orphan receptor C                                       | -0.19  | AAGGAGCTCTTCAGCACTGAA  | NM_005060: | NM_001001523.NM_005060:                  |
| 6098   | ROS1        | v-ros UR2 sarcoma virus oncogene homolog 1 (avian)                  | 0.06   | AAGTAATGCTCTAACTTTA    | NM_002944: | NM_002944:                               |
| 6098   | ROS1        | v-ros UR2 sarcoma virus oncogene homolog 1 (avian)                  | 1.20   | ACCGAGAAGGGTTAAACTATA  | NM_002944: | NM_002944:                               |
| 6101   | RP1         | retinitis pigmentosa 1 (autosomal dominant)                         | 0.03   | ATGGTGTGGATCAGACTCTTA  | NM_006269: | NM_006269:                               |
| 6101   | RP1         | retinitis pigmentosa 1 (autosomal dominant)                         | 0.44   | AGGCTATTGCTCATCATTCAA  | NM_006269: | NM_006269:                               |
| 26095  | RP11-142I17 | protein tyrosine phosphatase, non-receptor type 20B                 | -0.02  | CCCACCTAACACTTAAACATA  | NM_015605: | NM_015605:                               |
| 26095  | RP11-142I17 | protein tyrosine phosphatase, non-receptor type 20B                 | 1.09   | CTGGTGACAAGCTATACCTAA  | NM_015605: | NM_015605:                               |
| 340156 | RP11-145H9  | hypothetical protein LOC340156                                      | 0.46   | TTGGTGTGATAAAGAAATTTA  | XM_373109: | NM_001012418:                            |
| 340156 | RP11-145H9  | hypothetical protein LOC340156                                      | 1.53   | AAGAATAAACATCGAACCTTAT | NM_373109: | NM_001012418:                            |
| 84061  | RP11-217H1  | implantation-associated protein                                     | -4.25  | CAGTGTGCTGTTGCAAGCAA   | NM_032121: | NM_032121:                               |
| 84061  | RP11-217H1  | implantation-associated protein                                     | 1.17   | ACCGAGAATTAAGTCCGTTAT  | NM_032121: | NM_032121:                               |
| 139596 | RP11-311P8  | hypothetical protein MGC23937 similar to CG4798                     | -0.36  | CCCATAATGCTCCATTCATA   | NM_145052: | NM_145052:                               |
| 139596 | RP11-311P8  | hypothetical protein MGC23937 similar to CG4798                     | 0.46   | ACCGAATTCACCAATGAAGTA  | NM_145052: | NM_145052:                               |
| 8227   | RP13-297E1E | DNA segment on chromosome X and Y (unique) 155 expressed sequ       | 0.22   | CGGGATGAACTCATGTACAAA  | NM_005088: | NM_005088:                               |
| 8227   | RP13-297E1E | DNA segment on chromosome X and Y (unique) 155 expressed sequ       | 1.10   | TACAAGTCCCTTAAGATCAAA  | NM_005088: | NM_005088:                               |
| 6102   | RP2         | retinitis pigmentosa 2 (X-linked recessive)                         | 0.06   | CATCCTGTTATGATTATATA   | NM_006915: | NM_006915:                               |
| 6102   | RP2         | retinitis pigmentosa 2 (X-linked recessive)                         | 0.01   | TCCTTAGTTAAGCTAAATTA   | NM_006915: | NM_006915:                               |
| 391013 | RP3-340N1.3 | similar to Group IIC secretory phospholipase A2 precursor (Phosphat | -0.60  | CCAGCCTGTGTTGAACAGCTA  | XM_372769: | XM_372769:                               |
| 391013 | RP3-340N1.3 | similar to Group IIC secretory phospholipase A2 precursor (Phosphat | -0.20  | AAGTGCTTCTCTCATATTA    | XM_372769: | XM_372769:                               |
| 80020  | RP5-119A7   | hypothetical protein FLJ23322                                       | -3.21  | CAGTCCTGATAGCAACAAA    | NM_024955: | NM_024955:                               |
| 80020  | RP5-119A7   | hypothetical protein FLJ23322                                       | -4.88  | TCGAGCTAGCTACGAATCCAA  | NM_024955: | NM_024955:                               |
| 51765  | RP6-213H19  | Mst3 and SOK1-related kinase                                        | 1.24   | CAGCAAGTCGTTGCTATTTAA  | NM_016542: | NM_016542:                               |
| 51765  | RP6-213H19  | Mst3 and SOK1-related kinase                                        | 0.24   | CCAAACCTACGCTCAAGATTA  | NM_016542: | NM_016542:                               |
| 6117   | RPA1        | replication protein A1, 70kDa                                       | -0.74  | CAGGAATATGTGCTAAGTCA   | NM_002945: | NM_002945:                               |
| 6117   | RPA1        | replication protein A1, 70kDa                                       | 0.62   | CGTGTGACGATCCCATGTTA   | NM_002945: | NM_002945:                               |
| 6118   | RPA2        | replication protein A2, 32kDa                                       | 2.43   | AACAGTGGATTCGAAAGCTAT  | NM_002946: | NM_002946:                               |
| 6118   | RPA2        | replication protein A2, 32kDa                                       | 0.12   | TACCAGGAGAGTACTTACATA  | NM_002946: | NM_002946:                               |
| 6119   | RPA3        | replication protein A3, 14kDa                                       | -1.90  | AAGGGAGTAAATCGACCTCTA  | NM_002947: | NM_002947:                               |
| 6119   | RPA3        | replication protein A3, 14kDa                                       | -2.29  | TCGCTGATTGGTCCGAGAAA   | NM_002947: | NM_002947:                               |
| 29935  | RPA4        | replication protein A4, 34kDa                                       | -4.96  | AACGGTCAATGCACACATGAT  | NM_013347: | NM_013347:                               |
| 29935  | RPA4        | replication protein A4, 34kDa                                       | -1.29  | ACGGTGAATGATAAATTGACA  | NM_013347: | NM_013347:                               |
| 6121   | RPE65       | retinal pigment epithelium-specific protein 65kDa                   | 0.89   | TACGTAACCTGCTCAAGATTA  | NM_000329: | NM_000329:                               |
| 6121   | RPE65       | retinal pigment epithelium-specific protein 65kDa                   | 0.68   | AGGACTACTCATGAAATTTAA  | NM_000329: | NM_000329:                               |
| 6103   | RPGR        | retinitis pigmentosa GTPase regulator                               | 0.64   | ATGAGCTGAATCCAAGTAA    | NM_000328: | NM_001034853.NM_001023582.NM_000328:     |
| 6103   | RPGR        | retinitis pigmentosa GTPase regulator                               | 0.75   | CACAGCTTTGATAACAGATAT  | NM_000328: | NM_001034853.NM_001023582.NM_000328:     |
| 57096  | RPGRIP1     | retinitis pigmentosa GTPase regulator interacting protein 1         | -0.36  | CACCTTTCATTTGCAAGGTA   | NM_020366: | NM_020366:                               |
| 57096  | RPGRIP1     | retinitis pigmentosa GTPase regulator interacting protein 1         | 0.13   | TTCATAGGTGATGGCTTTAAA  | NM_020366: | NM_020366:                               |
| 6134   | RPL10       | ribosomal protein L10                                               | -0.93  | CAGAACACAGTTGCAACTCA   | NM_006013: | NM_006013:                               |
| 6134   | RPL10       | ribosomal protein L10                                               | 0.54   | TGGCCTTATGTCAGTTGCTCA  | NM_006013: | NM_006013:                               |
| 6137   | RPL13       | ribosomal protein L13                                               | 0.81   | CAAGCCCTGGATAATGCTTTA  | NM_000977: | NM_033251.NM_000977:                     |
| 6137   | RPL13       | ribosomal protein L13                                               | 1.91   | TTGGTTAGTGACTGATGTAAA  | NM_000977: | NM_033251.NM_000977:                     |
| 6155   | RPL27       | (ribos) ribosomal protein L27                                       | -2.44  | ATGCGCAAGAGATCAAAAGATA | NM_000988: | NM_000988:                               |
| 6155   | RPL27       | (ribos) ribosomal protein L27                                       | -2.53  | CACAAGTACTCTGTGGATAT   | NM_000988: | XM_499470.NM_000988.NM_498236:           |
| 11224  | RPL35       | (ribos) ribosomal protein L35                                       | -4.90  | CCGGTTCTCACAGTATTTAA   | NM_007209: | NM_007209:                               |
| 25873  | RPL36       | ribosomal protein L36                                               | 0.28   | CTGCCCTCTCCCTGAAATATA  | NM_015414: | NM_033643.NM_015414:                     |
| 6169   | RPL38       | (ribos) ribosomal protein L38                                       | -3.14  | AACGTGAAGTTTAAAGTTCGA  | NM_000999: | NM_000999.NM_001035258:                  |
| 6169   | RPL38       | (ribos) ribosomal protein L38                                       | -2.89  | TAAGGACAACCTGAAAGTTAA  | NM_000999: | NM_000999.NM_001035258:                  |
| 6124   | RPL4        | ribosomal protein L4                                                | 2.16   | CAGGAGTGAGAAACATGAAA   | NM_000968: | NM_000968:                               |
| 6124   | RPL4        | ribosomal protein L4                                                | -0.68  | ACAGGCAATGAGAAACATGAA  | NM_000968: | NM_000968:                               |
| 6181   | RPLP2       | ribosomal protein, large, P2                                        | -1.99  | CAAGTTATCAGTGAGCTGAA   | NM_001004: | NM_001004.NM_498057:                     |
| 6181   | RPLP2       | ribosomal protein, large, P2                                        | -5.46  | AAGGAGGAGTCTGAAGAGTCA  | NM_001004: | NM_001004:                               |
| 10557  | RPP38       | ribonuclease P/MRP 38kDa subunit                                    | -2.11  | CTCCAAAGTAACTTTCGATATA | NM_006414: | NM_183005.NM_006414:                     |
| 10557  | RPP38       | ribonuclease P/MRP 38kDa subunit                                    | -0.32  | ACGCTTGAGGACAGGCTTAAA  | NM_006414: | NM_183005.NM_006414:                     |
| 6223   | RPS19       | ribosomal protein S19                                               | -1.06  | AACAAGAAGCATAGAACAAA   | NM_001022: | NM_001022:                               |
| 6223   | RPS19       | ribosomal protein S19                                               | -4.45  | CTGGTTTAAATAAATTCGCTCA | NM_001022: | NM_001022:                               |
| 6195   | RPS6KA1     | ribosomal protein S6 kinase, 90kDa, polypeptide 1                   | 0.39   | CCCAACATCATCACTCTGAAA  | NM_002953: | NM_001006665.NM_002953:                  |
| 6195   | RPS6KA1     | ribosomal protein S6 kinase, 90kDa, polypeptide 1                   | -0.06  | TGCCACGTAAGTCTGAAAGTAA | NM_002953: | NM_001006665.NM_002953:                  |
| 6196   | RPS6KA2     | ribosomal protein S6 kinase, 90kDa, polypeptide 2                   | 0.04   | CCGAGTGAGATCGAAGATGGA  | NM_021135: | NM_021135.NM_001006932:                  |
| 6196   | RPS6KA2     | ribosomal protein S6 kinase, 90kDa, polypeptide 2                   | -0.45  | CCGAGGCTCTGAAAGCTGCAA  | NM_021135: | NM_021135.NM_001006932:                  |
| 6197   | RPS6KA3     | ribosomal protein S6 kinase, 90kDa, polypeptide 3                   | 0.31   | AGCGCTGAGAATGGACAGCAA  | NM_004586: | NM_004586:                               |
| 6197   | RPS6KA3     | ribosomal protein S6 kinase, 90kDa, polypeptide 3                   | 0.57   | TCGAAACATATCACTCTAAA   | NM_004586: | NM_004586:                               |
| 8986   | RPS6KA4     | ribosomal protein S6 kinase, 90kDa, polypeptide 4                   | -0.36  | CAGGCTGTGCTTGGACTTTTA  | NM_003942: | NM_003942.NM_001006944:                  |
| 8986   | RPS6KA4     | ribosomal protein S6 kinase, 90kDa, polypeptide 4                   | -0.72  | CGCCACCTTCATGGCAATTTAA | NM_003942: | NM_003942.NM_001006944:                  |
| 9252   | RPS6KA5     | ribosomal protein S6 kinase, 90kDa, polypeptide 5                   | 0.19   | AAGCCAGTCAATTCGAGATGAA | NM_004755: | NM_004755.NM_182398:                     |
| 9252   | RPS6KA5     | ribosomal protein S6 kinase, 90kDa, polypeptide 5                   | 0.17   | CTGGATCTTACGTAATTTCA   | NM_004755: | NM_182398:                               |

|        |                                                                               |                                                   |       |                        |               |                                                                |
|--------|-------------------------------------------------------------------------------|---------------------------------------------------|-------|------------------------|---------------|----------------------------------------------------------------|
| 27330  | RPS6KA6                                                                       | ribosomal protein S6 kinase, 90kDa, polypeptide 6 | -0.25 | CAGCGGTACTGCTGAACAA    | NM_014496:    | NM_014496:                                                     |
| 27330  | RPS6KA6                                                                       | ribosomal protein S6 kinase, 90kDa, polypeptide 6 | 0.35  | GGCAGAGTAATGGTCTTAAA   | NM_014496:    | NM_014496:                                                     |
| 6198   | RPS6KB1                                                                       | ribosomal protein S6 kinase, 70kDa, polypeptide 1 | -0.44 | AAGAAGGGTATCCTTTTCA    | NM_003161:    | NM_003161:                                                     |
| 6198   | RPS6KB1                                                                       | ribosomal protein S6 kinase, 70kDa, polypeptide 1 | 0.48  | CAGAGAGTCAATGCTATTACA  | NM_003161:    | NM_003161:                                                     |
| 6199   | RPS6KB2                                                                       | ribosomal protein S6 kinase, 70kDa, polypeptide 2 | -0.40 | ACCAGGAGAAACCGGAAGAAA  | NM_003952:    | NM_001007071:NM_003952:                                        |
| 6199   | RPS6KB2                                                                       | ribosomal protein S6 kinase, 70kDa, polypeptide 2 | -3.16 | CGGGCTGAGCGGAACATTCTA  | NM_003952:    | NM_001007071:NM_003952:                                        |
| 26750  | RPS6KC1                                                                       | ribosomal protein S6 kinase, 52kDa, polypeptide 1 | 0.18  | CAGGATGGTTTATATGATTA   | NM_012424:    | NM_012424:                                                     |
| 26750  | RPS6KC1                                                                       | ribosomal protein S6 kinase, 52kDa, polypeptide 1 | -0.01 | CGGGTGTGTTTACGGAAGAAA  | NM_012424:    | NM_012424:                                                     |
| 83694  | RPS6KL1                                                                       | ribosomal protein S6 kinase-like 1                | -0.98 | CGGGATGTTAGTGAGGACTAT  | NM_031464:    | NM_031464:                                                     |
| 83694  | RPS6KL1                                                                       | ribosomal protein S6 kinase-like 1                | 0.03  | CTGAATTTGATGGAAAGGAA   | NM_031464:    | NM_031464:                                                     |
| 3921   | RPSA                                                                          | ribosomal protein SA                              | 1.24  | TCGACATGAGTTGTACTTCTA  | NM_002295:    | NM_002295:NM_001012321:                                        |
| 3921   | RPSA                                                                          | ribosomal protein SA                              | -0.66 | TACCTGGGATGGCATATCAAA  | NM_002295:    | NM_002295:NM_001012321:                                        |
| 6237   | RRAS (relater related RAS viral (r-ras) oncogene homolog                      |                                                   | 0.31  | CGGGTCACTGCTGTATATAA   | NM_006270:    | NM_006270:                                                     |
| 6237   | RRAS (relater related RAS viral (r-ras) oncogene homolog                      |                                                   | -1.77 | CTGGCCAAACTGCGTCTCAA   | NM_006270:    | NM_006270:                                                     |
| 22800  | RRAS2 related RAS viral (r-ras) oncogene homolog 2                            |                                                   | 0.45  | AACAGTTAGCACGGCAGCTTA  | NM_012250:    | NM_012250:                                                     |
| 22800  | RRAS2 related RAS viral (r-ras) oncogene homolog 2                            |                                                   | 0.13  | CTGAAGCTACAGGTTGTGAAA  | NM_012250:    | NM_012250:                                                     |
| 6238   | RRBP1 ribosome binding protein 1 homolog 180kDa (dog)                         |                                                   | 1.01  | AAGAGATTGATAGAGAGCTAA  | NM_004587:    | NM_004587:                                                     |
| 6238   | RRBP1 ribosome binding protein 1 homolog 180kDa (dog)                         |                                                   | 1.25  | ATGGATATTTACGACACTCAA  | NM_004587:    | NM_004587:                                                     |
| 10692  | RRH (retinal retinal pigment epithelium-derived rhodopsin homolog             |                                                   | 0.75  | CACAATGCAATTATTATTA    | NM_006583:    | NM_006583:                                                     |
| 10692  | RRH (retinal retinal pigment epithelium-derived rhodopsin homolog             |                                                   | -1.31 | CAGACATGGATCATTGTCTCTA | NM_006583:    | NM_006583:                                                     |
| 6240   | RRM1 ribonucleotide reductase M1 polypeptide                                  |                                                   | -8.92 | CTGGTGGTCTCTAGAAAGCAA  | NM_001033:    | NM_001033:                                                     |
| 6240   | RRM1 ribonucleotide reductase M1 polypeptide                                  |                                                   | -4.24 | AACGGATATTTAGAAATCAA   | NM_001033:    | NM_001033:                                                     |
| 6241   | RRM2 ribonucleotide reductase M2 polypeptide                                  |                                                   | 0.61  | CGGGATTAATAGCTTGATTA   | NM_001034:    | NM_001034:                                                     |
| 6241   | RRM2 ribonucleotide reductase M2 polypeptide                                  |                                                   | 0.58  | CGGGATTAACAGCTCCTTTA   | NM_001034:    | NM_001034:                                                     |
| 50484  | RRM2B ribonucleotide reductase M2 B (TP53 inducible)                          |                                                   | -1.24 | AACCAGGAGGTTATCATGGTA  | NM_015713:    | NM_015713:                                                     |
| 50484  | RRM2B ribonucleotide reductase M2 B (TP53 inducible)                          |                                                   | -0.45 | GAGCAGTTACAGTGATCATAA  | NM_015713:    | NM_015713:                                                     |
| 6248   | RSC1A1 regulatory solute carrier protein, family 1, member 1                  |                                                   | 0.08  | ATCCAATTCATATGGTTAA    | NM_006511:    | NM_006511:                                                     |
| 6248   | RSC1A1 regulatory solute carrier protein, family 1, member 1                  |                                                   | -0.32 | CTCAATCAGACTTCTGAGCAA  | NM_006511:    | NM_006511:                                                     |
| 84870  | RSPQ3 R-spondin 3 homolog (Xenopus laevis)                                    |                                                   | 1.32  | CTCGATATCCAGATATAAATA  | NM_032784:    | NM_032784:                                                     |
| 84870  | RSPQ3 R-spondin 3 homolog (Xenopus laevis)                                    |                                                   | 0.66  | AAGGGAAGCACTTACGGTTTA  | NM_032784:    | NM_032784:                                                     |
| 89970  | RSPRY1 ring finger and SPRY domain containing 1                               |                                                   | 0.04  | CCTGATATCTGAAAGCTCAA   | NM_133368:    | NM_133368:                                                     |
| 89970  | RSPRY1 ring finger and SPRY domain containing 1                               |                                                   | 0.74  | GCCTATTGTGCTGTAAGAAA   | NM_133368:    | NM_133368:                                                     |
| 6251   | RSU1 Ras suppressor protein 1                                                 |                                                   | -1.88 | CACCGAGATATGCTAATTTAA  | NM_012425:    | NM_012425:NM_012425:                                           |
| 6251   | RSU1 Ras suppressor protein 1                                                 |                                                   | 1.46  | CAGCAGAAAGCAATAGTAAA   | NM_012425:    | NM_012425:NM_012425:                                           |
| 83546  | RTBDN retbindin                                                               |                                                   | -1.06 | AACCTCGGGAATGATGGATTA  | NM_031429:    | NM_031429:                                                     |
| 83546  | RTBDN retbindin                                                               |                                                   | -0.27 | CACCTTGGAGCTCTTATCTCA  | NM_031429:    | NM_031429:                                                     |
| 27156  | RTDR1 rhabdoid tumor deletion region gene 1                                   |                                                   | -1.14 | CAACAGTATGGTGGCATAAAA  | NM_014433:    | NM_014433:                                                     |
| 27156  | RTDR1 rhabdoid tumor deletion region gene 1                                   |                                                   | 0.18  | CACAGTATCACTGAAAGGAAA  | NM_014433:    | NM_014433:                                                     |
| 51750  | RTEL1 regulator of telomere elongation helicase 1                             |                                                   | -0.21 | AAGCAGCAAGCCGACATCATA  | NM_016434:    | NM_016434:NM_032957:                                           |
| 51750  | RTEL1 regulator of telomere elongation helicase 1                             |                                                   | -0.73 | CCAGTACAGCTTTCAGACCAA  | NM_016434:    | NM_016434:NM_032957:                                           |
| 84816  | RTN4IP1 reticulon 4 interacting protein 1                                     |                                                   | 2.02  | ACGAGGAAGAGCTGTAATTA   | NM_032730:    | NM_032730:                                                     |
| 84816  | RTN4IP1 reticulon 4 interacting protein 1                                     |                                                   | 0.56  | CACGAGGAAGAGCTGTAATTA  | NM_032730:    | NM_032730:                                                     |
| 65078  | RTN4R reticulon 4 receptor                                                    |                                                   | -1.25 | CGGGTATATAGAGATATGCA   | NM_023004:    | NM_023004:                                                     |
| 65078  | RTN4R reticulon 4 receptor                                                    |                                                   | 0.31  | CAGCTGGACCTCAGCGATAAT  | NM_023004:    | NM_023004:                                                     |
| 146760 | RTN4RL1 reticulon 4 receptor-like 1                                           |                                                   | 0.48  | CAGAACGCTGAATCCAATTA   | NM_178568:    | NM_178568:                                                     |
| 146760 | RTN4RL1 reticulon 4 receptor-like 1                                           |                                                   | 1.02  | ACCTGCCATGTGGATTATAA   | NM_178568:    | NM_178568:                                                     |
| 349667 | RTN4RL2 reticulon 4 receptor-like 2                                           |                                                   | 0.54  | CACCTGTGGCTCTTCCCAA    | NM_178570:    | NM_178570:                                                     |
| 349667 | RTN4RL2 reticulon 4 receptor-like 2                                           |                                                   | 0.00  | CACCATCCTCACTGTTCAAA   | NM_178570:    | NM_178570:                                                     |
| 132112 | RTP1 receptor transporter protein 1                                           |                                                   | -0.67 | AAGACAGGATATCTCCATAA   | NM_153708:    | NM_153708:                                                     |
| 132112 | RTP1 receptor transporter protein 1                                           |                                                   | 0.81  | TTGGCAAGATCATTGGTTTA   | NM_153708:    | NM_153708:                                                     |
| 344892 | RTP2 receptor transporter protein 2                                           |                                                   | -1.32 | TAGGGTGTGCTACTTACCATA  | NM_001004312: | NM_001004312:                                                  |
| 344892 | RTP2 receptor transporter protein 2                                           |                                                   | -0.92 | CGGAATGAGAGGATGTCATTA  | NM_001004312: | NM_001004312:                                                  |
| 83597  | RTP3 receptor transporter protein 3                                           |                                                   | 0.03  | AAGCAATGTTTTCAGGAGTTA  | NM_031440:    | NM_031440:                                                     |
| 83597  | RTP3 receptor transporter protein 3                                           |                                                   | 0.49  | CAAGGTGGAGGAGTATGTTAA  | NM_031440:    | NM_031440:                                                     |
| 64108  | RTPA receptor transporter protein 4                                           |                                                   | 1.30  | CATAATGGATTAGTAATAAA   | NM_022147:    | NM_022147:                                                     |
| 64108  | RTPA receptor transporter protein 4                                           |                                                   | 1.38  | AACGAGCAACCTGAAAGCTA   | NM_022147:    | NM_022147:                                                     |
| 25914  | RTTN rotatin                                                                  |                                                   | -0.99 | GTGGAAGTTACTGACAGGAA   | M55632:       | NM_173630:                                                     |
| 861    | RUNX1 runt-related transcription factor 1 (acute myeloid leukemia 1; aml1 onc |                                                   | 0.91  | CAGGAAAGTTAAGGTATCAAT  | NM_001754:    | NM_001001890:NM_001754:                                        |
| 861    | RUNX1 runt-related transcription factor 1 (acute myeloid leukemia 1; aml1 onc |                                                   | 0.58  | CTCCCTTTTATGTTAATCAAA  | NM_001754:    | NM_001001890:NM_001754:                                        |
| 860    | RUNX2 runt-related transcription factor 2                                     |                                                   | -0.07 | CAGCAGCTTATAAATCCAAA   | NM_004348:    | NM_001015051:NM_001024630:NM_004348:                           |
| 860    | RUNX2 runt-related transcription factor 2                                     |                                                   | -2.35 | CAGCAGCACTCCATATCTCTA  | NM_004348:    | NM_001015051:NM_001024630:NM_004348:                           |
| 6256   | RXRA retinoid X receptor, alpha                                               |                                                   | -0.67 | TCGGTACGATGTTCTCTGAAA  | NM_002957:    | NM_002957:                                                     |
| 6256   | RXRA retinoid X receptor, alpha                                               |                                                   | 0.86  | TTGGTGAAGCAAGTACATAA   | NM_002957:    | NM_002957:                                                     |
| 6257   | RXRB retinoid X receptor, beta                                                |                                                   | 0.14  | AGGGATCTGCTGATATCCCA   | NM_021976:    | NM_021976:                                                     |
| 6257   | RXRB retinoid X receptor, beta                                                |                                                   | 0.07  | GAGGCAACTCATTCTGTTAA   | NM_021976:    | NM_021976:                                                     |
| 6258   | RXRG retinoid X receptor, gamma                                               |                                                   | -0.63 | CAGGGTGAATGAATGCTGA    | NM_006917:    | NM_006917:                                                     |
| 6258   | RXRG retinoid X receptor, gamma                                               |                                                   | -1.67 | CGGATCTGCTGTTAAACATA   | NM_006917:    | NM_006917:                                                     |
| 23429  | RYBP RING1 and YY1 binding protein                                            |                                                   | 0.58  | TAGCTTGAGTAAACTGTTCTA  | NM_012234:    | NM_012234:                                                     |
| 23429  | RYBP RING1 and YY1 binding protein                                            |                                                   | 0.66  | TAGCTGCATTTGCAATGGAA   | NM_012234:    | NM_012234:                                                     |
| 6259   | RYK RYK receptor-like tyrosine kinase                                         |                                                   | 0.02  | CGTCTTGTATGACAGAACTTTA | NM_002958:    | NM_001005861:NM_002958:                                        |
| 6259   | RYK RYK receptor-like tyrosine kinase                                         |                                                   | -1.39 | CTGATCGGTCTGTATGCGAGAA | NM_002958:    | NM_001005861:NM_002958:                                        |
| 6261   | RYR1 ryanodine receptor 1 (skeletal)                                          |                                                   | 0.81  | CGAAGCGGATGAGAACGAAA   | NM_000540:    | NM_000540:                                                     |
| 6261   | RYR1 ryanodine receptor 1 (skeletal)                                          |                                                   | 0.18  | CTGGAAATGGACGATAGAGAA  | NM_000540:    | NM_000540:                                                     |
| 6262   | RYR2 ryanodine receptor 2 (cardiac)                                           |                                                   | -1.82 | AAGAGTTGTCTATGATGAGAA  | NM_001035:    | NM_001035:                                                     |
| 6262   | RYR2 ryanodine receptor 2 (cardiac)                                           |                                                   | 0.94  | GAGGATGAAGTACGAGATATA  | NM_001035:    | NM_001035:                                                     |
| 6263   | RYR3 (ryanoc ryanodine receptor 3                                             |                                                   | -0.29 | ACGAGAAGATGAGAGACTAA   | NM_001036:    | NM_001036:                                                     |
| 6263   | RYR3 (ryanoc ryanodine receptor 3                                             |                                                   | 1.05  | CACGACTGATTAACGATGTAA  | NM_001036:    | NM_001036:                                                     |
| 6284   | S100A13 (S11S100 calcium binding protein A13                                  |                                                   | 2.04  | AACGCACTCTTCCCAAATAA   | XM_371380:    | NM_001024211:NM_005979:NM_001024210:NM_001024213:NM_001024212: |
| 6284   | S100A13 (S11S100 calcium binding protein A13                                  |                                                   | 0.43  | CAGGAAAGAAAGAACCTGAA   | XM_371380:    | NM_001024211:NM_005979:NM_001024210:NM_001024213:NM_001024212: |
| 6289   | SAA2 (serum serum amyloid A2                                                  |                                                   | -4.43 | AAGCTGAGATATGGCATATAA  | NM_030754:    | NM_030754:                                                     |
| 6289   | SAA2 (serum serum amyloid A2                                                  |                                                   | -0.01 | ATGGCATATAATAGGCATCTA  | NM_030754:    | NM_030754:                                                     |
| 55811  | SAC testicular soluble adenylyl cyclase                                       |                                                   | 1.74  | ACCGTGGCAATCATTTTCTAA  | NM_018417:    | NM_018417:                                                     |
| 55811  | SAC testicular soluble adenylyl cyclase                                       |                                                   | -2.40 | CTGGCACAACCTTTACCGGCAA | NM_018417:    | NM_018417:                                                     |
| 22908  | SACM1L SAC1 suppressor of actin mutations 1-like (yeast)                      |                                                   | 0.69  | AACGGTATGTAAGGTAGTATA  | NM_014016:    | NM_014016:                                                     |
| 22908  | SACM1L SAC1 suppressor of actin mutations 1-like (yeast)                      |                                                   | 0.76  | AAGGACCAACTTAAACGTTAA  | NM_014016:    | NM_014016:                                                     |
| 26278  | SACS spastic ataxia of Charlevoix-Saguenay (sacsin)                           |                                                   | -0.47 | CGGACAGACTTACTCTCAA    | NM_014363:    | NM_014363:                                                     |
| 26278  | SACS spastic ataxia of Charlevoix-Saguenay (sacsin)                           |                                                   | 1.35  | CGCAAGACTGTTTATGAAA    | NM_014363:    | NM_014363:                                                     |
| 6294   | SAFB scaffold attachment factor B                                             |                                                   | -4.29 | ACGGACTGTAGTAATGAGTAA  | NM_002967:    | NM_002967:                                                     |
| 6294   | SAFB scaffold attachment factor B                                             |                                                   | -0.09 | CTGGCATATTTAGTCTGAATA  | NM_002967:    | NM_002967:                                                     |
| 6295   | SAG S-antigen; retina and pineal gland (arrestin)                             |                                                   | 0.20  | CGCCATAATCTGAAAGATGCA  | NM_000541:    | NM_000541:                                                     |
| 6295   | SAG S-antigen; retina and pineal gland (arrestin)                             |                                                   | 0.09  | CTCGAGTGATTTACGTCAA    | NM_000541:    | NM_000541:                                                     |
| 6299   | SALL1 sal-like 1 (Drosophila)                                                 |                                                   | -0.62 | AAGGAGATCGTACAGGTTAA   | NM_002968:    | NM_002968:                                                     |
| 6299   | SALL1 sal-like 1 (Drosophila)                                                 |                                                   | -2.03 | CACGACTAAAGGCAATCTTAA  | NM_002968:    | NM_002968:                                                     |
| 6297   | SALL2 sal-like 2 (Drosophila)                                                 |                                                   | -2.39 | AAGCTGGGCACTGTTACCAA   | NM_005407:    | NM_005407:                                                     |
| 6297   | SALL2 sal-like 2 (Drosophila)                                                 |                                                   | -0.61 | CCCGGAAATGCTCGGCGAAA   | NM_005407:    | NM_005407:                                                     |
| 10284  | SAP18 Sin3A-associated protein, 18kDa                                         |                                                   | 0.49  | AGCCACGGGATGTTATGAAAT  | NM_005870:    | NM_005870:                                                     |
| 10284  | SAP18 Sin3A-associated protein, 18kDa                                         |                                                   | 0.02  | AACGGCCATATAGGATTGTTAA | NM_005870:    | NM_005870:                                                     |



|        |                                                                                     |       |                        |            |                                                    |
|--------|-------------------------------------------------------------------------------------|-------|------------------------|------------|----------------------------------------------------|
| 8819   | SAP30 (Sin3/ Sin3A-associated protein, 30kDa)                                       | -1.09 | CCAGAGGTTGATTTATACCAA  | NM_003864: | NM_003864:                                         |
| 8819   | SAP30 (Sin3/ Sin3A-associated protein, 30kDa)                                       | 0.36  | GACGTGGGAATTGAGACTAATA | NM_003864: | NM_003864:                                         |
| 23098  | SARM1 sterile alpha and TIR motif containing 1                                      | -1.03 | AGCGGTGTGGCGACTAACAA   | NM_015077: | NM_015077:                                         |
| 23098  | SARM1 sterile alpha and TIR motif containing 1                                      | -0.43 | CTGCTATTAATCCACATTAA   | NM_015077: | NM_015077:                                         |
| 6303   | SAT spermidine/spermine N1-acetyltransferase                                        | 1.48  | CAAGGTGGTGTGATCTTAATA  | NM_002970: | NM_002970:                                         |
| 6303   | SAT spermidine/spermine N1-acetyltransferase                                        | 1.52  | CTCCTTGAATATCTTTCGATA  | NM_002970: | NM_002970:                                         |
| 6304   | SATB1 (speci special AT-rich sequence binding protein 1 (binds to nuclear matrix/sc | -0.03 | TCCAAGCAATTCATACTATAA  | NM_002971: | NM_002971:                                         |
| 6304   | SATB1 (speci special AT-rich sequence binding protein 1 (binds to nuclear matrix/sc | 1.46  | ACCGAATATACCAGGACGAA   | NM_002971: | NM_002971:                                         |
| 6305   | SBF1 SET binding factor 1                                                           | 0.36  | CAGCGCCGAGCTCTCCGTAA   | NM_002972: | NM_002972:                                         |
| 6305   | SBF1 SET binding factor 1                                                           | 0.11  | CGCGTGGTGTGGCCCTGTTA   | NM_002972: | NM_002972:                                         |
| 388228 | SBK1 SH3-binding domain kinase 1                                                    | -3.13 | ACGGGAGGTGAGCATCACCAA  | XM_370948: | NM_001024401:                                      |
| 388228 | SBK1 SH3-binding domain kinase 1                                                    | -2.99 | CAGCGACGTCCACCAAGCACTA | XM_370948: | NM_001024401:                                      |
| 6309   | SC5DL sterol-C5-desaturase (ERG3 delta-5-desaturase homolog, fungal)-like           | 1.17  | ATCGATATCCACATGATTTAA  | NM_006918: | NM_006918;NM_001024956:                            |
| 6309   | SC5DL sterol-C5-desaturase (ERG3 delta-5-desaturase homolog, fungal)-like           | 0.98  | AACGTTGGTATGATATGATA   | NM_006918: | NM_006918;NM_001024956:                            |
| 22937  | SCAP SREBP cleavage-activating protein                                              | -1.36 | CTGGCCGACGCTCTCAGCTA   | NM_012235: | NM_012235:                                         |
| 22937  | SCAP SREBP cleavage-activating protein                                              | 1.47  | CCTGACTGTAATAATATTTAA  | NM_012235: | NM_012235:                                         |
| 51435  | SCARA3 scavenger receptor class A, member 3                                         | -0.84 | CACCATCTTCCACCAACATCAA | NM_016240: | NM_182826;NM_016240:                               |
| 51435  | SCARA3 scavenger receptor class A, member 3                                         | -0.55 | CCAGAGGAAGAGACCATGAAA  | NM_016240: | NM_182826;NM_016240:                               |
| 286133 | SCARA5 scavenger receptor class A, member 5 (putative)                              | -0.07 | AAGGTTTGCAATTTAAGTTAA  | NM_173833: | NM_173833:                                         |
| 286133 | SCARA5 scavenger receptor class A, member 5 (putative)                              | -2.04 | CTGGCCATACACGCTGTTCAA  | NM_173833: | NM_173833:                                         |
| 949    | SCARB1 scavenger receptor class B, member 1                                         | -1.04 | CGGATCCATGAAGCTAATGTA  | NM_005505: | NM_005505:                                         |
| 949    | SCARB1 scavenger receptor class B, member 1                                         | -1.54 | TAGGAGAGGCTGCTCAACAA   | NM_005505: | NM_005505:                                         |
| 950    | SCARB2 scavenger receptor class B, member 2                                         | 0.24  | AAGACAGTACCTTAACCTTA   | NM_005506: | NM_005506:                                         |
| 950    | SCARB2 scavenger receptor class B, member 2                                         | 0.35  | CTGGTCTAATCTAATCAGTA   | NM_005506: | NM_005506:                                         |
| 8578   | SCARF1 scavenger receptor class F, member 1                                         | 0.21  | AACCTACATGTTGCTGATAA   | NM_003693: | NM_145350;NM_145349;NM_145352;NM_003693:           |
| 8578   | SCARF1 scavenger receptor class F, member 1                                         | 0.95  | TAGATTGAATTTGATAAAGTA  | NM_003693: | NM_145351;NM_145350;NM_145349;NM_145352;NM_003693: |
| 91179  | SCARF2 scavenger receptor class F, member 2                                         | -2.11 | CGGCTTAAAGACCGCCTCTTA  | NM_153334: | NM_153334;NM_182895:                               |
| 91179  | SCARF2 scavenger receptor class F, member 2                                         | 0.74  | CGGAGGCAGAAACTACCCAA   | NM_153334: | NM_153334;NM_182895:                               |
| 374875 | SCDR10 short-chain dehydrogenase/reductase 10                                       | 1.24  | TCGCTGGCTCATCGAGGTAAA  | NM_198705: | NM_198533;NM_198704;NM_198705;NM_198706:           |
| 374875 | SCDR10 short-chain dehydrogenase/reductase 10                                       | -3.90 | CGCCTATTATGGGATGACAA   | NM_198705: | NM_198533;NM_198705;NM_198706;NM_198708:           |
| 29106  | SCG3 secretogranin III                                                              | -1.22 | AAGAGTGGATTGGATCATAAA  | NM_013243: | NM_013243:                                         |
| 29106  | SCG3 secretogranin III                                                              | 2.38  | ATGGTGAATATGGAAACAATA  | NM_013243: | NM_013243:                                         |
| 7356   | SCGB1A1 secretoglobulin, family 1A, member 1 (uteroglobulin)                        | -3.14 | AAAGCCAGAGAAAGCATCAT   | NM_003357: | NM_003357:                                         |
| 7356   | SCGB1A1 secretoglobulin, family 1A, member 1 (uteroglobulin)                        | -1.83 | AATGAGGCTGCCATGGAACCT  | NM_003357: | NM_003357:                                         |
| 6336   | SCN10A sodium channel, voltage-gated, type X, alpha                                 | -0.02 | CGCTCCATGGCACTCTCTAA   | NM_006514: | NM_006514:                                         |
| 6336   | SCN10A sodium channel, voltage-gated, type X, alpha                                 | -3.94 | CACAGGCGAATGTGTCATGAA  | NM_006514: | NM_006514:                                         |
| 11280  | SCN11A sodium channel, voltage-gated, type XI, alpha                                | -2.25 | CACGCTACCTCATAGCTCAA   | NM_014139: | NM_014139:                                         |
| 11280  | SCN11A sodium channel, voltage-gated, type XI, alpha                                | -1.43 | CAGGAGGAGCTTGGTATACTA  | NM_014139: | NM_014139:                                         |
| 6323   | SCN1A sodium channel, voltage-gated, type I, alpha                                  | 0.81  | AAGCTTCTTTACGTACAATA   | NM_006920: | NM_006920:                                         |
| 6323   | SCN1A sodium channel, voltage-gated, type I, alpha                                  | 0.32  | ACGCATCAATCGGTGTTGAT   | NM_006920: | NM_006920:                                         |
| 6324   | SCN1B sodium channel, voltage-gated, type I, beta                                   | -1.09 | ACCGCCATGCATGATGGGTAA  | NM_001037: | NM_001037:                                         |
| 6324   | SCN1B sodium channel, voltage-gated, type I, beta                                   | -1.10 | CAGAGATGATTTACTGCTACA  | NM_001037: | NM_001037:                                         |
| 6326   | SCN2A2 sodium channel, voltage-gated, type II, alpha 2                              | -0.28 | CTCGTATGATAGTGTGACCAA  | NM_021007: | NM_021007:                                         |
| 6326   | SCN2A2 sodium channel, voltage-gated, type II, alpha 2                              | -0.20 | CACGCTGTTAGCTTAACTGCAA | NM_021007: | NM_021007:                                         |
| 6327   | SCN2B (sodi. sodium channel, voltage-gated, type II, beta)                          | 0.60  | CTCCATCTGTTTATGAGAAAT  | NM_004588: | NM_004588:                                         |
| 6327   | SCN2B (sodi. sodium channel, voltage-gated, type II, beta)                          | -0.20 | CGCGTGGAGTTCTCAGGGAA   | NM_004588: | NM_004588:                                         |
| 6328   | SCN3A sodium channel, voltage-gated, type III, alpha                                | 0.18  | CTCCATAATAAATATATAA    | NM_006922: | NM_006922:                                         |
| 6328   | SCN3A sodium channel, voltage-gated, type III, alpha                                | 0.93  | TTGGATTTATGAGGTCATAA   | NM_006922: | NM_006922:                                         |
| 55800  | SCN3B sodium channel, voltage-gated, type III, beta                                 | -0.86 | CCCAATAGCTGCTGATCTCAA  | NM_018400: | NM_018400:                                         |
| 55800  | SCN3B sodium channel, voltage-gated, type III, beta                                 | -1.24 | CCAGACCGTTAACACATTTAA  | NM_018400: | NM_018400:                                         |
| 6329   | SCN4A sodium channel, voltage-gated, type IV, alpha                                 | -1.31 | CTGGCTCAATGTCAAGGTCAA  | NM_000334: | NM_000334:                                         |
| 6329   | SCN4A sodium channel, voltage-gated, type IV, alpha                                 | 0.49  | CAAGATTGCCTGGACTGCAA   | NM_000334: | NM_000334:                                         |
| 6331   | SCN5A sodium channel, voltage-gated, type V, alpha (long QT syndrome 3)             | 0.04  | TCCTGTAAGAGTATTAACAAA  | NM_000335: | NM_198056;NM_000335:                               |
| 6331   | SCN5A sodium channel, voltage-gated, type V, alpha (long QT syndrome 3)             | -0.52 | CTGGACCAAGGTGAAAGTCAA  | NM_000335: | NM_198056;NM_000335:                               |
| 6332   | SCN7A sodium channel, voltage-gated, type VII, alpha                                | -0.12 | CGGATGGTAAATTAAGCTTTGA | NM_002976: | NM_002976:                                         |
| 6332   | SCN7A sodium channel, voltage-gated, type VII, alpha                                | 1.72  | AGAGATGTTTCATGCTACTAAA | NM_002976: | NM_002976:                                         |
| 6334   | SCN8A sodium channel, voltage-gated, type VIII, alpha                               | 0.02  | AACAACCAACTAATTGACTAA  | NM_014191: | NM_014191:                                         |
| 6334   | SCN8A sodium channel, voltage-gated, type VIII, alpha                               | 1.68  | TCGCAAGTGAAGATGTTGTTA  | NM_014191: | NM_014191:                                         |
| 6335   | SCN9A sodium channel, voltage-gated, type IX, alpha                                 | 1.59  | ATGATCTTTAAGAATCGTAA   | NM_002977: | NM_002977:                                         |
| 6335   | SCN9A sodium channel, voltage-gated, type IX, alpha                                 | 1.50  | TCGGATAGTGAATACAGCAAA  | NM_002977: | NM_002977:                                         |
| 6337   | SCNN1A sodium channel, nonvoltage-gated 1 alpha                                     | -0.52 | CCCGATGTATGAAACTGCTA   | NM_001038: | NM_001038:                                         |
| 6337   | SCNN1A sodium channel, nonvoltage-gated 1 alpha                                     | 1.50  | TACAGTACCAGGAAATTTAA   | NM_001038: | NM_001038:                                         |
| 6338   | SCNN1B sodium channel, nonvoltage-gated 1, beta (Liddle syndrome)                   | 0.19  | CTGCAATGACACCCAGTACAA  | NM_000336: | NM_000336:                                         |
| 6338   | SCNN1B sodium channel, nonvoltage-gated 1, beta (Liddle syndrome)                   | -0.52 | TGGCCCAACCTGGAAGTCAA   | NM_000336: | NM_000336:                                         |
| 6339   | SCNN1D sodium channel, nonvoltage-gated 1, delta                                    | -1.30 | CACACTTGGGCTGCTGTAAA   | NM_002978: | NM_002978:                                         |
| 6339   | SCNN1D sodium channel, nonvoltage-gated 1, delta                                    | -2.03 | CTGCAGGAGGACGAGGAGCAA  | NM_002978: | NM_002978:                                         |
| 6340   | SCNN1G sodium channel, nonvoltage-gated 1, gamma                                    | -1.23 | ATCCGGGACCTGAACTATTA   | NM_001039: | NM_001039:                                         |
| 6340   | SCNN1G sodium channel, nonvoltage-gated 1, gamma                                    | -0.46 | CAAGGCCGGCAAGTAAACAAA  | NM_001039: | NM_001039:                                         |
| 9997   | SCO2 SCO cytochrome oxidase deficient homolog 2 (yeast)                             | -0.28 | CGGCCTTCCACGATTACTA    | NM_005138: | NM_005138:                                         |
| 9997   | SCO2 SCO cytochrome oxidase deficient homolog 2 (yeast)                             | 0.98  | CCCGAGCGGACGACGTTGAA   | NM_005138: | NM_005138:                                         |
| 59342  | SCPEP1 serine carboxypeptidase 1                                                    | -0.02 | CTGGGAATACAGGTACCCAA   | NM_021626: | NM_021626:                                         |
| 59342  | SCPEP1 serine carboxypeptidase 1                                                    | 1.20  | AAGCAATGATGTGATTTATA   | NM_021626: | NM_021626:                                         |
| 6343   | SCT (secretin secretin)                                                             | 0.84  | GTGGTACTTGGCACCATAAAA  | NM_021920: | NM_021920:                                         |
| 6343   | SCT (secretin secretin)                                                             | 0.47  | ACCAATAAAGGAGGAATCAGA  | NM_021920: | NM_021920:                                         |
| 6344   | SCTR secretin receptor                                                              | -4.44 | CGGATGCTCACCAGCAGAAA   | NM_002980: | NM_002980:                                         |
| 6344   | SCTR secretin receptor                                                              | 0.56  | CTCCTTCTCTGAAAGAAA     | NM_002980: | NM_002980:                                         |
| 80274  | SCUBE1 (sigr signal peptide, CUB domain, EGF-like 1                                 | -1.55 | CCCGCTTTGACCTTGCCCAA   | NM_173050: | NM_173050:                                         |
| 80274  | SCUBE1 (sigr signal peptide, CUB domain, EGF-like 1                                 | -4.81 | CACGTGTGGTTGCCACAGAA   | NM_173050: | NM_173050:                                         |
| 222663 | SCUBE3 signal peptide, CUB domain, EGF-like 3                                       | 0.35  | CACCTGTCCACACCTAATAA   | NM_152753: | NM_152753:                                         |
| 222663 | SCUBE3 signal peptide, CUB domain, EGF-like 3                                       | 0.94  | CCCGTGAGATGTAAGAAACA   | NM_152753: | NM_152753:                                         |
| 9255   | SCYE1 small inducible cytokine subfamily E, member 1 (endothelial monocyte          | -0.50 | ACTGGTCAATTAATAATAA    | NM_004757: | NM_004757:                                         |
| 9255   | SCYE1 small inducible cytokine subfamily E, member 1 (endothelial monocyte          | 0.01  | CACATAGATAACTAAGTAGAT  | NM_004757: | NM_004757:                                         |
| 57410  | SCYL1 SCY1-like 1 (S. cerevisiae)                                                   | -0.51 | ACAGATGTATTTATTGTACAA  | NM_020680: | NM_020680:                                         |
| 57410  | SCYL1 SCY1-like 1 (S. cerevisiae)                                                   | -0.58 | CTCACTGTAGATCCTGAGAAA  | NM_020680: | NM_020680:                                         |
| 55681  | SCYL2 SCY1-like 2 (S. cerevisiae)                                                   | 1.48  | ATGCGTTATTAACCATCTTAA  | NM_017988: | NM_017988:                                         |
| 55681  | SCYL2 SCY1-like 2 (S. cerevisiae)                                                   | 0.48  | AGGGTTACAGAAATAAACATA  | NM_017988: | NM_017988:                                         |
| 57147  | SCYL3 SCY1-like 3 (S. cerevisiae)                                                   | -1.94 | AAGCTCTATTATGAATAACA   | NM_020423: | NM_181093;NM_020423:                               |
| 57147  | SCYL3 SCY1-like 3 (S. cerevisiae)                                                   | -1.18 | CAGGACAAATCCGGAAGTAAA  | NM_020423: | NM_020423:                                         |
| 6382   | SDC1 syndecan 1                                                                     | 0.00  | CAGGAGAAATCTTAGCCTGA   | NM_002997: | NM_002997;NM_001006946:                            |
| 6382   | SDC1 syndecan 1                                                                     | -3.26 | CAGGCGCTCTGGACAGGAAA   | NM_002997: | NM_002997;NM_001006946:                            |
| 6383   | SDC2 syndecan 2 (heparan sulfate proteoglycan 1, cell surface-associated, 1         | 0.30  | AAGTACGAGTAGAGGTTTAA   | NM_002998: | NM_002998:                                         |
| 6383   | SDC2 syndecan 2 (heparan sulfate proteoglycan 1, cell surface-associated, 1         | 1.59  | ATGAATAGACATAAATTTGAA  | NM_002998: | NM_002998:                                         |
| 6385   | SDC4 syndecan 4 (amphiglycan, ryudocan)                                             | 1.48  | CAGAAGAGACATGTTCTCTTA  | NM_002999: | NM_002999:                                         |
| 6385   | SDC4 syndecan 4 (amphiglycan, ryudocan)                                             | 0.71  | CCAGCTCTGATTACCTTTGAA  | NM_002999: | NM_002999:                                         |

|        |           |                                                                           |       |                        |            |                                                               |
|--------|-----------|---------------------------------------------------------------------------|-------|------------------------|------------|---------------------------------------------------------------|
| 6386   | SDCBP     | syndecan binding protein (syntenin)                                       | 1.81  | TGGGATGGTCTTGAAGATATT  | NM_005625: | NM_005625:NM_001007068:NM_001007067:NM_01007069:NM_001007070: |
| 6386   | SDCBP     | syndecan binding protein (syntenin)                                       | 1.28  | TTGACTCTTAAGATTATGTAA  | NM_005625: | NM_005625:NM_001007068:NM_001007067:NM_01007069:NM_001007070: |
| 6389   | SDHA      | succinate dehydrogenase complex, subunit A, flavoprotein (Fp)             | -2.02 | AAGAGGGCATCTGCTAAAGTT  | NM_004168: | NM_004168:                                                    |
| 6389   | SDHA      | succinate dehydrogenase complex, subunit A, flavoprotein (Fp)             | -1.07 | AACCAGTATTTTGGGAGTA    | NM_004168: | NM_004168:                                                    |
| 6390   | SDHB      | succinate dehydrogenase complex, subunit B, iron sulfur (Ip)              | -4.55 | CAGCTCAGAGCTGCAACATAA  | NM_003000: | NM_003000:                                                    |
| 6390   | SDHB      | succinate dehydrogenase complex, subunit B, iron sulfur (Ip)              | -0.01 | CATGCTAAACATGATTATAA   | NM_003000: | NM_003000:                                                    |
| 6391   | SDHC      | succinate dehydrogenase complex, subunit C, integral membrane prot        | 0.53  | CACAGTGTATTGAAAGAA     | NM_003001: | NM_003001:NM_001035511:NM_001035512:NM_01035513:              |
| 6391   | SDHC      | succinate dehydrogenase complex, subunit C, integral membrane prot        | -0.02 | CTGGTAGACCATAATAGTGGGA | NM_003001: | NM_003001:NM_001035511:NM_001035512:NM_01035513:              |
| 121214 | SDR-O     | orphan short-chain dehydrogenase / reductase                              | -0.91 | CAGAGTCAGAGATGTCATCAA  | NM_148897: | NM_148897:                                                    |
| 121214 | SDR-O     | orphan short-chain dehydrogenase / reductase                              | 0.85  | GAGGATATTTCGGATCTAT    | NM_148897: | NM_148897:                                                    |
| 23478  | SEC11L1   | SEC11-like 1 (S. cerevisiae)                                              | -3.04 | CCGTCATACCTCCTCTATTA   | NM_014300: | NM_014300:                                                    |
| 23478  | SEC11L1   | SEC11-like 1 (S. cerevisiae)                                              | -1.61 | CACGAGTTGAAACCGTCATA   | NM_014300: | NM_014300:                                                    |
| 157708 | SEC11L2   | SEC11-like 2 (S. cerevisiae)                                              | -0.13 | CAGCTTCCATCATCTTTAA    | XM_088367: | XM_088367:                                                    |
| 157708 | SEC11L2   | SEC11-like 2 (S. cerevisiae)                                              | 0.31  | CTGCATTGCTTGGAAAGGGAA  | XM_088367: | XM_088367:                                                    |
| 6400   | SEL1L     | sel-1 suppressor of lin-12-like (C. elegans)                              | -2.22 | ACGGCACAAGGAGCAATTGAA  | NM_005065: | NM_005065:                                                    |
| 6400   | SEL1L     | sel-1 suppressor of lin-12-like (C. elegans)                              | -0.05 | CAGGATATTCACCTTGGGAAA  | NM_005065: | NM_005065:                                                    |
| 6401   | SELE      | selectin E (endothelial adhesion molecule 1)                              | -1.80 | CAGTTGAAATGCACCACTCAA  | NM_000450: | NM_000450:                                                    |
| 6401   | SELE      | selectin E (endothelial adhesion molecule 1)                              | -0.69 | CGGAAAGTATTTCAAGCCTAA  | NM_000450: | NM_000450:                                                    |
| 6402   | SELL      | selectin L (lymphocyte adhesion molecule 1)                               | -0.35 | CACGATATTATTAGTAAGAAA  | NM_000655: | NM_000655:                                                    |
| 6402   | SELL      | selectin L (lymphocyte adhesion molecule 1)                               | -0.03 | CTGGAATCTGGTCAATCCTA   | NM_000655: | NM_000655:                                                    |
| 6403   | SELP      | selectin P (granule membrane protein 140kDa, antigen CD62)                | 0.13  | CCGATATAGTTCGGTGTGATA  | NM_003005: | NM_003005:                                                    |
| 6403   | SELP      | selectin P (granule membrane protein 140kDa, antigen CD62)                | 0.35  | CTGGGCTGATAATGAACCTAA  | NM_003005: | NM_003005:                                                    |
| 6404   | SELPLG    | selectin P ligand                                                         | -1.11 | ACGGAGGCACAGACCACTCAA  | NM_003006: | NM_003006:                                                    |
| 6404   | SELPLG    | selectin P ligand                                                         | -0.76 | ATGGAGTACAGACCACTCAA   | NM_003006: | NM_003006:                                                    |
| 55829  | SELS      | selenoprotein S                                                           | 0.20  | AGGCCTCTAGATGATTAGCAA  | NM_018445: | NM_018445:                                                    |
| 55829  | SELS      | selenoprotein S                                                           | -1.75 | AACCTTAAACCTCGATTCAA   | NM_018445: | NM_018445:                                                    |
| 56920  | SEMA3G    | sema domain, immunoglobulin domain (Ig), short basic domain, secre        | -0.29 | CCCTGCCCTATTGAAACTCAA  | NM_020163: | NM_020163:                                                    |
| 56920  | SEMA3G    | sema domain, immunoglobulin domain (Ig), short basic domain, secre        | -0.64 | CAGGCTTCACTTTGTAAACCA  | NM_020163: | NM_020163:                                                    |
| 10507  | SEMA4D    | sema domain, immunoglobulin domain (Ig), transmembrane domain (T          | -0.02 | ACGGATAGCAAGAGTGGCAA   | NM_006378: | NM_006378:                                                    |
| 10507  | SEMA4D    | sema domain, immunoglobulin domain (Ig), transmembrane domain (T          | -0.57 | CCGGCAGATCTCGGCAACCAA  | NM_006378: | NM_006378:                                                    |
| 80031  | SEMA6D    | sema domain, transmembrane domain (TM), and cytoplasmic domain,           | 0.48  | CAGGTTGAGTACCTAGAATA   | NM_020858: | NM_153616:NM_024966:NM_153617:NM_153618:NM_153619:NM_020858:  |
| 80031  | SEMA6D    | sema domain, transmembrane domain (TM), and cytoplasmic domain,           | 0.06  | TACAGACATAATAACAATCAA  | NM_020858: | NM_153616:NM_024966:NM_153617:NM_153618:NM_153619:NM_020858:  |
| 29843  | SENP1     | SUMO1/sentrin specific peptidase 1                                        | 0.25  | TCGATTTGGACTATGAATCAA  | NM_014554: | NM_014554:                                                    |
| 29843  | SENP1     | SUMO1/sentrin specific peptidase 1                                        | 0.30  | TCGCCTGACCATTACACGCAA  | NM_014554: | NM_014554:                                                    |
| 59343  | SENP2     | SUMO1/sentrin/SMT3 specific peptidase 2                                   | -0.09 | AAGAACAACGGTAACATAA    | NM_021627: | NM_021627:                                                    |
| 59343  | SENP2     | SUMO1/sentrin/SMT3 specific peptidase 2                                   | 0.61  | CCACACAAGAACAACGCTAA   | NM_021627: | NM_021627:                                                    |
| 26168  | SENP3     | SUMO1/sentrin/SMT3 specific peptidase 3                                   | -1.56 | CAGGCAGGCGGTAAGAAA     | NM_015670: | NM_015670:                                                    |
| 26168  | SENP3     | SUMO1/sentrin/SMT3 specific peptidase 3                                   | 1.21  | GACGAATTCCTCAAAAGCTAT  | NM_015670: | NM_015670:                                                    |
| 205564 | SENP5     | SUMO1/sentrin specific peptidase 5                                        | 0.38  | CAGAATCTGTTCTAATACCA   | NM_152699: | NM_152699:                                                    |
| 205564 | SENP5     | SUMO1/sentrin specific peptidase 5                                        | 0.30  | GTGCTGATTGCCACACTAAA   | NM_152699: | NM_152699:                                                    |
| 26054  | SENP6     | SUMO1/sentrin specific peptidase 6                                        | -1.04 | AAGGCGTATGTTAAGTAAA    | NM_015571: | NM_015571:                                                    |
| 26054  | SENP6     | SUMO1/sentrin specific peptidase 6                                        | -1.30 | CAGAACAAATGTGCAATAGTA  | NM_015571: | NM_015571:                                                    |
| 57337  | SENP7     | SUMO1/sentrin specific peptidase 7                                        | 0.24  | GTGGCATTATATGATTAAA    | NM_020654: | NM_020654:                                                    |
| 57337  | SENP7     | SUMO1/sentrin specific peptidase 7                                        | 0.51  | ACCGTGAGACAACTAATGAAA  | NM_020654: | NM_020654:                                                    |
| 123228 | SENP8     | SUMO/sentrin specific peptidase family member 8                           | -1.37 | CCAGCTATCTATAATGTTT    | NM_145204: | NM_145204:                                                    |
| 123228 | SENP8     | SUMO/sentrin specific peptidase family member 8                           | 0.53  | TCCTTATCCACATTGGCTTA   | NM_145204: | NM_145204:                                                    |
| 57190  | SEPN1     | selenoprotein N, 1                                                        | 0.19  | CCCAACATGCCCTGTAATAAA  | NM_020451: | NM_206926:NM_020451:                                          |
| 57190  | SEPN1     | selenoprotein N, 1                                                        | -0.01 | TACACGCACCTTCTCACTTAA  | NM_020451: | NM_206926:NM_020451:                                          |
| 10801  | SEPT9     | sepin 9                                                                   | -2.92 | ACGCACGATATTGAGGAGAAA  | NM_006640: | NM_006640:                                                    |
| 10801  | SEPT9     | sepin 9                                                                   | -1.20 | CACGCAGTATTGAGGAGAAA   | NM_006640: | NM_006640:                                                    |
| 5265   | SERPINA1  | serpin peptidase inhibitor, clade A (alpha-1 antiproteinase, antitrypsin) | 0.88  | CCCGAGGTCAAGTTCACAAA   | NM_000295: | NM_001002236:NM_001002235:NM_000295:                          |
| 5265   | SERPINA1  | serpin peptidase inhibitor, clade A (alpha-1 antiproteinase, antitrypsin) | -3.31 | CACCCACGATATCATCACCAA  | NM_000295: | NM_001002236:NM_001002235:NM_000295:                          |
| 51156  | SERPINA10 | serpin peptidase inhibitor, clade A (alpha-1 antiproteinase, antitrypsin) | -0.30 | ACCATGTTGAGCTAGGTTAA   | NM_016186: | NM_016186:                                                    |
| 51156  | SERPINA10 | serpin peptidase inhibitor, clade A (alpha-1 antiproteinase, antitrypsin) | 0.73  | TAGGTTGTTCTCAAAATAA    | NM_016186: | NM_016186:                                                    |
| 256394 | SERPINA11 | serpin peptidase inhibitor, clade A (alpha-1 antiproteinase, antitrypsin) | 0.77  | CAGAATTGACCTGACAAATAT  | XM_170754: | XM_170754:                                                    |
| 256394 | SERPINA11 | serpin peptidase inhibitor, clade A (alpha-1 antiproteinase, antitrypsin) | -0.74 | CACCAACATACTCAACTTGA   | XM_170754: | XM_170754:                                                    |
| 145264 | SERPINA12 | serpin peptidase inhibitor, clade A (alpha-1 antiproteinase, antitrypsin) | -0.05 | CTCGTCGTCAGATAGACAAA   | NM_173850: | NM_173850:                                                    |
| 145264 | SERPINA12 | serpin peptidase inhibitor, clade A (alpha-1 antiproteinase, antitrypsin) | -2.98 | ATCAATGACTTTATCAGTCAA  | NM_173850: | NM_173850:                                                    |
| 388007 | SERPINA13 | serpin peptidase inhibitor, clade A (alpha-1 antiproteinase, antitrypsin) | -5.69 | AAGGATAGTAAATGGTGATCAA | NM_207378: | NM_207378:                                                    |
| 388007 | SERPINA13 | serpin peptidase inhibitor, clade A (alpha-1 antiproteinase, antitrypsin) | 1.00  | TCGTCGATGATTGGTTGAA    | NM_207378: | NM_207378:                                                    |
| 390502 | SERPINA2  | serpin peptidase inhibitor, clade A (alpha-1 antiproteinase, antitrypsin) | 0.24  | CACGGCAAGTGGAAAGATAA   | XM_372532: | XM_372532:                                                    |
| 390502 | SERPINA2  | serpin peptidase inhibitor, clade A (alpha-1 antiproteinase, antitrypsin) | -1.78 | CGGCAGTAGCCTGTTGTTAA   | XM_372532: | XM_372532:                                                    |
| 12     | SERPINA3  | serpin peptidase inhibitor, clade A (alpha-1 antiproteinase, antitrypsin) | -1.08 | AAGGACCATTTGCGTTTCAA   | NM_001085: | NM_001085:                                                    |
| 12     | SERPINA3  | serpin peptidase inhibitor, clade A (alpha-1 antiproteinase, antitrypsin) | -0.33 | AAGGCTGTGCTTGTATTTT    | NM_001085: | NM_001085:                                                    |
| 5267   | SERPINA4  | serpin peptidase inhibitor, clade A (alpha-1 antiproteinase, antitrypsin) | -4.25 | CAGGCTGGTGTACCCAGTAA   | NM_006215: | NM_006215:                                                    |
| 5267   | SERPINA4  | serpin peptidase inhibitor, clade A (alpha-1 antiproteinase, antitrypsin) | 0.10  | AAGGATGACACCCGAAGTCCA  | NM_006215: | NM_006215:                                                    |
| 5104   | SERPINA5  | serpin peptidase inhibitor, clade A (alpha-1 antiproteinase, antitrypsin) | -0.50 | AAGGTGGAATGGCCCTTTA    | NM_000624: | NM_000624:                                                    |
| 5104   | SERPINA5  | serpin peptidase inhibitor, clade A (alpha-1 antiproteinase, antitrypsin) | -2.85 | CACCCAGCATGGTAGTGCAA   | NM_000624: | NM_000624:                                                    |
| 866    | SERPINA6  | serpin peptidase inhibitor, clade A (alpha-1 antiproteinase, antitrypsin) | -3.32 | CACCTAAACCTGACCTCAA    | NM_001756: | NM_001756:                                                    |
| 866    | SERPINA6  | serpin peptidase inhibitor, clade A (alpha-1 antiproteinase, antitrypsin) | 0.46  | CAACAGTATGTCAGAATAA    | NM_001756: | NM_001756:                                                    |
| 6906   | SERPINA7  | serpin peptidase inhibitor, clade A (alpha-1 antiproteinase, antitrypsin) | 1.37  | TAGGGAAGTTGTAACCCAA    | NM_000354: | NM_000354:                                                    |
| 6906   | SERPINA7  | serpin peptidase inhibitor, clade A (alpha-1 antiproteinase, antitrypsin) | 1.53  | ACCTATTATCCAATTGATA    | NM_000354: | NM_000354:                                                    |
| 327657 | SERPINA9  | serpin peptidase inhibitor, clade A (alpha-1 antiproteinase, antitrypsin) | 0.35  | CCCTGAATATACAGAAGAAA   | NM_175739: | NM_175739:                                                    |
| 327657 | SERPINA9  | serpin peptidase inhibitor, clade A (alpha-1 antiproteinase, antitrypsin) | 0.17  | AAGGTTGATGACATAATCCAA  | NM_175739: | NM_175739:                                                    |
| 1992   | SERPINB1  | serpin peptidase inhibitor, clade B (ovalbumin), member 1                 | 1.58  | TTGGCATAATTCCTCAGGTA   | NM_030666: | NM_030666:                                                    |
| 1992   | SERPINB1  | serpin peptidase inhibitor, clade B (ovalbumin), member 1                 | 1.55  | CTCGATTTCATGAAGTTAAT   | NM_030666: | NM_030666:                                                    |
| 5273   | SERPINB10 | serpin peptidase inhibitor, clade B (ovalbumin), member 10                | -2.88 | CAGGAATGTCTCAGCAAGAA   | NM_005024: | NM_005024:                                                    |
| 5273   | SERPINB10 | serpin peptidase inhibitor, clade B (ovalbumin), member 10                | 1.56  | AACGATGACTACTACTTAA    | NM_005024: | NM_005024:                                                    |
| 89778  | SERPINB11 | serpin peptidase inhibitor, clade B (ovalbumin), member 11                | -1.71 | CACGATCCTATTCTGTGGCAA  | NM_080475: | NM_080475:                                                    |
| 89778  | SERPINB11 | serpin peptidase inhibitor, clade B (ovalbumin), member 11                | 0.21  | CAGATCAAACCTGAAATTTA   | NM_080475: | NM_080475:                                                    |
| 89778  | SERPINB12 | serpin peptidase inhibitor, clade B (ovalbumin), member 12                | -1.39 | TTGGTGGAGTTTAAATGCAA   | NM_080474: | NM_080474:                                                    |
| 89778  | SERPINB12 | serpin peptidase inhibitor, clade B (ovalbumin), member 12                | -1.37 | ACGATCTGGGTGGAGTTTAA   | NM_080474: | NM_080474:                                                    |
| 5275   | SERPINB13 | serpin peptidase inhibitor, clade B (ovalbumin), member 13                | 0.24  | TTGGAAGCTCTGAAATGATA   | NM_012397: | NM_012397:                                                    |
| 5275   | SERPINB13 | serpin peptidase inhibitor, clade B (ovalbumin), member 13                | 1.01  | ACCGATTACTCATATGATT    | NM_012397: | NM_012397:                                                    |
| 5055   | SERPINB2  | serpin peptidase inhibitor, clade B (ovalbumin), member 2                 | -0.17 | AACCTATGACAACTCAACAA   | NM_002575: | NM_002575:                                                    |
| 5055   | SERPINB2  | serpin peptidase inhibitor, clade B (ovalbumin), member 2                 | -2.35 | CAGAAGGGTAGTTATCTGAT   | NM_002575: | NM_002575:                                                    |
| 6317   | SERPINB3  | serpin peptidase inhibitor, clade B (ovalbumin), member 3                 | -1.11 | TCGGATCATCACTACTTCAA   | NM_006919: | NM_006919:                                                    |
| 6317   | SERPINB3  | serpin peptidase inhibitor, clade B (ovalbumin), member 3                 | -0.52 | TAGGATTCGATCATCACTAA   | NM_006919: | NM_006919:                                                    |
| 6318   | SERPINB4  | serpin peptidase inhibitor, clade B (ovalbumin), member 4                 | -0.18 | TGGAATATCATCTCCTTCAA   | NM_002974: | NM_002974:                                                    |
| 6318   | SERPINB4  | serpin peptidase inhibitor, clade B (ovalbumin), member 4                 | 0.27  | ACCGCTGATGATGATGTCGAA  | NM_002974: | NM_002974:                                                    |
| 5268   | SERPINB5  | serpin peptidase inhibitor, clade B (ovalbumin), member 5                 | -0.02 | GCCTTGATCTGTCAACAAA    | NM_002639: | NM_002639:                                                    |
| 5268   | SERPINB5  | serpin peptidase inhibitor, clade B (ovalbumin), member 5                 | 0.61  | TTCTTGACATGCAATGTTAA   | NM_002639: | NM_002639:                                                    |
| 5269   | SERPINB6  | serpin peptidase inhibitor, clade B (ovalbumin), member 6                 | 0.02  | CCGGGTTTAACTAGAGGAA    | NM_004568: | NM_004568:                                                    |

|        |          |                                                                          |        |                         |            |                                   |
|--------|----------|--------------------------------------------------------------------------|--------|-------------------------|------------|-----------------------------------|
| 5269   | SERPINB6 | serpin peptidase inhibitor, clade B (ovalbumin), member 6                | -1.78  | CACCGAGGAGAGACTGTTTAA   | NM_004568: | NM_004568:                        |
| 8710   | SERPINB7 | serpin peptidase inhibitor, clade B (ovalbumin), member 7                | -1.18  | ATCGCAGATATTCTAGCTTCA   | NM_003784: | NM_003784:                        |
| 8710   | SERPINB7 | serpin peptidase inhibitor, clade B (ovalbumin), member 7                | -0.96  | CACGCTCATTTCTATCATCTT   | NM_003784: | NM_003784:                        |
| 5271   | SERPINB8 | serpin peptidase inhibitor, clade B (ovalbumin), member 8                | 0.14   | TTAGACAGCTTTGAGTAATTTAA | NM_002640: | NM_002640:NM_198833:              |
| 5271   | SERPINB8 | serpin peptidase inhibitor, clade B (ovalbumin), member 8                | -0.08  | ACCCTGAGTCCCTTAACATA    | NM_002640: | NM_002640:NM_198833:              |
| 5272   | SERPINB9 | serpin peptidase inhibitor, clade B (ovalbumin), member 9                | 0.67   | TCCTATGTAATGAGCTAGAAA   | NM_004155: | NM_004155:                        |
| 5272   | SERPINB9 | serpin peptidase inhibitor, clade B (ovalbumin), member 9                | -1.04  | CACCTGCGAATACATTCCTTAA  | NM_004155: | NM_004155:                        |
| 462    | SERPINC1 | serpin peptidase inhibitor, clade C (antithrombin), member 1             | 0.80   | CCAAACCTTGTGTTAAGTAAA   | NM_000488: | NM_000488:                        |
| 462    | SERPINC1 | serpin peptidase inhibitor, clade C (antithrombin), member 1             | -0.01  | ACCGATGTCATCCCTCGGAA    | NM_000488: | NM_000488:                        |
| 3053   | SERPIND1 | serpin peptidase inhibitor, clade D (heparin cofactor), member 1         | 1.49   | TGGGCTAATGTTGGGGCTTAA   | NM_000185: | NM_000185:                        |
| 3053   | SERPIND1 | serpin peptidase inhibitor, clade D (heparin cofactor), member 1         | -1.91  | CCCAAGGAGGGTACACAACATA  | NM_000185: | NM_000185:                        |
| 5054   | SERPINE1 | serpin peptidase inhibitor, clade E (nexin, plasminogen activator inhibi | -0.09  | TTGATGGAATTTGACCATACA   | NM_000602: | NM_000602:                        |
| 5054   | SERPINE1 | serpin peptidase inhibitor, clade E (nexin, plasminogen activator inhibi | 0.55   | TTGAGGACCTTTAGGTCAAA    | NM_000602: | NM_000602:                        |
| 5270   | SERPINE2 | serpin peptidase inhibitor, clade E (nexin, plasminogen activator inhibi | -1.35  | CAGGATGGCTGGAAACACTGTA  | NM_006216: | NM_006216:                        |
| 5270   | SERPINE2 | serpin peptidase inhibitor, clade E (nexin, plasminogen activator inhibi | 0.18   | CTGGAGGATTTGGAGGGAAA    | NM_006216: | NM_006216:                        |
| 5176   | SERPINF1 | serpin peptidase inhibitor, clade F (alpha-2 antiplasmin, pigment epith  | -0.06  | CTGCTGGACGGCTGGATTAGAA  | NM_002615: | NM_002615:                        |
| 5176   | SERPINF1 | serpin peptidase inhibitor, clade F (alpha-2 antiplasmin, pigment epith  | -0.02  | TCGGAGTTCATTCATGACATA   | NM_002615: | NM_002615:                        |
| 5345   | SERPINF2 | serpin peptidase inhibitor, clade F (alpha-2 antiplasmin, pigment epith  | 1.83   | AAGCTGTATCGAAACACCAA    | NM_000934: | NM_000934:                        |
| 5345   | SERPINF2 | serpin peptidase inhibitor, clade F (alpha-2 antiplasmin, pigment epith  | 1.51   | ACCCACCCACTTTGAATGGAA   | NM_000934: | NM_000934:                        |
| 710    | SERPING1 | serpin peptidase inhibitor, clade G (C1 inhibitor), member 1, (angioed   | 0.69   | TCACGACTCTATAAATAAAA    | NM_000062: | NM_000062:NM_001032295:           |
| 710    | SERPING1 | serpin peptidase inhibitor, clade G (C1 inhibitor), member 1, (angioed   | -0.12  | AACCTGAAACATCGTCTTGAA   | NM_000062: | NM_000062:NM_001032295:           |
| 871    | SERPINH1 | serpin peptidase inhibitor, clade H (heat shock protein 47), member 1    | 0.07   | CAAGCACTTATTGTACATTT    | NM_001235: | NM_001235:                        |
| 871    | SERPINH1 | serpin peptidase inhibitor, clade H (heat shock protein 47), member 1    | -8.80  | CCCAACCTCCCAACTATAAA    | NM_001235: | NM_001235:                        |
| 5274   | SERPINI1 | serpin peptidase inhibitor, clade I (neuroserpin), member 1              | 0.68   | AACAATATGTAAATTATAA     | NM_005025: | NM_005025:                        |
| 5274   | SERPINI1 | serpin peptidase inhibitor, clade I (neuroserpin), member 1              | 0.08   | CAAGTTATTGTGACCACTCCA   | NM_005025: | NM_005025:                        |
| 5276   | SERPINI2 | serpin peptidase inhibitor, clade I (pancpin), member 2                  | 0.51   | CTGGCTCAAGCCAAATTATA    | NM_006217: | NM_006217:                        |
| 5276   | SERPINI2 | serpin peptidase inhibitor, clade I (pancpin), member 2                  | -0.69  | CTCCCTAGATTTAAAGTAGAA   | NM_006217: | NM_006217:                        |
| 91404  | SESTD1   | SEC14 and spectrin domains 1                                             | -0.36  | ATCCCGCATGTTGCAACATA    | NM_178123: | NM_178123:                        |
| 91404  | SESTD1   | SEC14 and spectrin domains 1                                             | 0.08   | CAGCGTGGATTTAATGGCTCA   | NM_178123: | NM_178123:                        |
| 6418   | SET      | SET translocation (myeloid leukemia-associated)                          | -0.42  | CAGGAATCTGGTCCAAATAA    | NM_003011: | NM_003011:                        |
| 6418   | SET      | SET translocation (myeloid leukemia-associated)                          | -2.31  | CAGCATAGTAGTCTACTACT    | NM_003011: | NM_003011:                        |
| 9739   | SETD1A   | SET domain containing 1A                                                 | -2.47  | CAGCGTATTATGAAAGCTGGA   | XM_049380: | NM_014712:                        |
| 9739   | SETD1A   | SET domain containing 1A                                                 | -2.48  | CACGCTAACTGCTACGCCAA    | XM_049380: | NM_014712:                        |
| 23067  | SETD1B   | SET domain containing 1B                                                 | 0.08   | CTGAATGATAACATCCGTGAA   | XM_037523: | XM_037523:                        |
| 23067  | SETD1B   | SET domain containing 1B                                                 | -0.35  | CAGGATTTCTGTTTAACTCCA   | XM_037523: | XM_037523:                        |
| 29072  | SETD2    | SET domain containing 2                                                  | -1.10  | CCCAAGTCTGATAAATTTAAA   | NM_012271: | NM_012271:NM_014159:              |
| 29072  | SETD2    | SET domain containing 2                                                  | -2.50  | CGGCTAATGGTTAGAATTGAA   | NM_012271: | NM_012271:NM_014159:              |
| 55209  | SETD5    | SET domain containing 5                                                  | 0.40   | AACGCGCTGAAACAACACCTA   | XM_371614: | XM_371614:                        |
| 55209  | SETD5    | SET domain containing 5                                                  | 0.17   | CACCTACATTTAGCAAGGAA    | XM_371614: | XM_371614:                        |
| 80854  | SETD7    | SET domain containing (lysine methyltransferase) 7                       | -1.34  | CACCTGGACGATGACGGATTA   | NM_030648: | NM_030648:                        |
| 80854  | SETD7    | SET domain containing (lysine methyltransferase) 7                       | 0.34   | CAGGGAGTTTACACTTACGAA   | NM_030648: | NM_030648:                        |
| 387893 | SETD8    | SET domain containing (lysine methyltransferase) 8                       | -2.21  | AAGAATAGATGAATGATTGA    | NM_020382: | NM_020382:                        |
| 387893 | SETD8    | SET domain containing (lysine methyltransferase) 8                       | -2.72  | CTGCAGTCTGAAGAAAGGAAA   | NM_020382: | NM_020382:                        |
| 9869   | SETDB1   | SET domain, bifurcated 1                                                 | 0.02   | ACCCATGGGATTGCAATTTAAA  | NM_012432: | NM_012432:                        |
| 9869   | SETDB1   | SET domain, bifurcated 1                                                 | 0.13   | ACCCGAGGCTTGGCTCTTAAA   | NM_012432: | NM_012432:                        |
| 83852  | SETDB2   | SET domain, bifurcated 2                                                 | 1.13   | CCGAGGACATCGAACTCTAA    | NM_031915: | NM_031915:                        |
| 83852  | SETDB2   | SET domain, bifurcated 2                                                 | -3.88  | ACGGGAGAGATGAGAATACTA   | NM_031915: | NM_031915:                        |
| 6419   | SETMAR   | (SE SET domain and mariner transposase fusion gene                       | 0.04   | TTGACCCCTACTTATATAGGAA  | NM_006515: | NM_006515:                        |
| 6419   | SETMAR   | (SE SET domain and mariner transposase fusion gene                       | -0.04  | ATGTTTTATATGGGAGGTAA    | NM_006515: | NM_006515:                        |
| 124925 | SEZ6     | (seizur seizure related 6 homolog (mouse)                                | -0.20  | TGGCGTGAATAACAAAGTCAA   | NM_178860: | NM_178860:                        |
| 124925 | SEZ6     | (seizur seizure related 6 homolog (mouse)                                | -2.42  | TAGCTGGACACAAGCATCAA    | NM_178860: | NM_178860:                        |
| 23544  | SEZ6L    | (seizu seizure related 6 homolog (mouse)-like                            | -0.25  | CCCGTGTGAAAGTTAATCAA    | NM_021115: | NM_021115:                        |
| 23544  | SEZ6L    | (seizu seizure related 6 homolog (mouse)-like                            | -0.78  | ACGGATCTCTTAGATATCCA    | NM_021115: | NM_021115:                        |
| 26470  | SEZ6L2   | seizure related 6 homolog (mouse)-like 2                                 | 0.52   | CCGAGTTCTGTGAATAACAA    | NM_012410: | NM_012410:                        |
| 26470  | SEZ6L2   | seizure related 6 homolog (mouse)-like 2                                 | -0.09  | GGGCTCGTATGCACTTCAA     | NM_012410: | NM_012410:                        |
| 10291  | SF3A1    | splicing factor 3a, subunit 1, 120kDa                                    | -1.26  | CAGCATGTAGTAGCTGCTCTA   | NM_005877: | NM_001005409:NM_005877:           |
| 10291  | SF3A1    | splicing factor 3a, subunit 1, 120kDa                                    | -10.28 | CAGGATAAGACGGAATGGAAA   | NM_005877: | NM_001005409:NM_005877:           |
| 2810   | SFN      | (stratifin) stratifin                                                    | 0.16   | ACCATGTTCTCTCAATAAAA    | NM_006142: | NM_006142:                        |
| 2810   | SFN      | (stratifin) stratifin                                                    | -3.79  | CCGGGAGAGGTTGGAGACTGA   | NM_006142: | NM_006142:                        |
| 6422   | SFRP1    | secreted frizzled-related protein 1                                      | -0.04  | AAGGGCCATTTGATTAGGAA    | NM_003012: | NM_003012:                        |
| 6422   | SFRP1    | secreted frizzled-related protein 1                                      | 0.32   | CAGCCTGCAGGGAATAACATA   | NM_003012: | NM_003012:                        |
| 6424   | SFRP4    | secreted frizzled-related protein 4                                      | 0.57   | CACCTGAGAATAATTTGACA    | NM_003014: | NM_003014:                        |
| 6424   | SFRP4    | secreted frizzled-related protein 4                                      | 0.55   | CCCGATCGGTGCAAGTGTAAA   | NM_003014: | NM_003014:                        |
| 6425   | SFRP5    | secreted frizzled-related protein 5                                      | -2.73  | CCGCTGGACAGAAGAATAAA    | NM_003015: | NM_003015:                        |
| 6425   | SFRP5    | secreted frizzled-related protein 5                                      | -3.06  | CTGCGAGGAGTACGACTACTA   | NM_003015: | NM_003015:                        |
| 6434   | SFRS10   | splicing factor, arginine/serine-rich 10 (transformer 2 homolog, Drosop  | -1.26  | CCCGATCTGAATCTAGGCTCA   | NM_004593: | NM_004593:                        |
| 6434   | SFRS10   | splicing factor, arginine/serine-rich 10 (transformer 2 homolog, Drosop  | 0.04   | CGGACTACTATAGCAGATCA    | NM_004593: | NM_004593:                        |
| 9169   | SFRS2IP  | splicing factor, arginine/serine-rich 2, interacting protein             | -0.16  | AAGGAGGTGATCCATTGGAAA   | NM_004719: | NM_004719:                        |
| 9169   | SFRS2IP  | splicing factor, arginine/serine-rich 2, interacting protein             | -3.14  | CTGGACAGGATTTAGCCTAA    | NM_004719: | NM_004719:                        |
| 8683   | SFRS9    | splicing factor, arginine/serine-rich 9                                  | -2.47  | CAGGGCCATTTAGCAGTAAA    | NM_003769: | NM_003769:                        |
| 8683   | SFRS9    | splicing factor, arginine/serine-rich 9                                  | -1.25  | TTGCTACTATGGAGATCAA     | NM_003769: | NM_003769:                        |
| 6441   | SFTPD    | surfactant, pulmonary-associated protein D                               | 0.03   | AGGAGTTTGGCCAGAAGTCAA   | NM_003019: | NM_003019:                        |
| 6441   | SFTPD    | surfactant, pulmonary-associated protein D                               | -3.45  | CTACCTGGAGACGAAATGAA    | NM_003019: | NM_003019:                        |
| 94097  | SFXN5    | sideroflexin 5                                                           | 0.245  | CAGGCTGTAATTTAGGATA     | NM_144579: | NM_144579:                        |
| 94097  | SFXN5    | sideroflexin 5                                                           | -6.87  | CAGCCGGACAGTGGTGTACAA   | NM_144579: | NM_144579:                        |
| 6442   | SGCA     | sarcoglycan, alpha (50kDa dystrophin-associated glycoprotein)            | -0.02  | AAGGACATTCAGAATAAATAT   | NM_000023: | NM_000023:                        |
| 6442   | SGCA     | sarcoglycan, alpha (50kDa dystrophin-associated glycoprotein)            | -4.94  | CAGGCTCAAAACAAGCAGGGA   | NM_000023: | NM_000023:                        |
| 6443   | SGCB     | sarcoglycan, beta (43kDa dystrophin-associated glycoprotein)             | 0.02   | CACITTTGAATTTGACATATA   | NM_000232: | NM_000232:                        |
| 6443   | SGCB     | sarcoglycan, beta (43kDa dystrophin-associated glycoprotein)             | -0.92  | ATGCAGATTTCTAGTGATTA    | NM_000232: | NM_000232:                        |
| 6445   | SGCG     | sarcoglycan, gamma (35kDa dystrophin-associated glycoprotein)            | 1.03   | CAAGATGTAGTTAAAGGAATA   | NM_000231: | NM_000231:                        |
| 6445   | SGCG     | sarcoglycan, gamma (35kDa dystrophin-associated glycoprotein)            | -0.26  | CCGTTGGAGTAAATGTATGA    | NM_000231: | NM_000231:                        |
| 6446   | SGK      | serum/glucocorticoid regulated kinase                                    | -0.02  | CACAGCTGAAATGTACGACAA   | NM_005627: | NM_005627:                        |
| 6446   | SGK      | serum/glucocorticoid regulated kinase                                    | -0.71  | CTGGGCTGTGATGACGAATAT   | NM_005627: | NM_005627:                        |
| 10110  | SGK2     | serum/glucocorticoid regulated kinase 2                                  | -2.91  | CAGGGCCAAATGGGAACATCAA  | NM_016276: | NM_016276:NM_170693:              |
| 10110  | SGK2     | serum/glucocorticoid regulated kinase 2                                  | 0.03   | TGGGTACGTGACTTCCCTAAA   | NM_016276: | NM_016276:NM_170693:              |
| 23678  | SGK3     | serum/glucocorticoid regulated kinase family, member 3                   | 0.94   | ACCAACTAATCTACATGCTTA   | NM_013257: | NM_170709:NM_001033578:NM_013257: |
| 23678  | SGK3     | serum/glucocorticoid regulated kinase family, member 3                   | 0.51   | CCACAGCGAGACCCCTAGTTAA  | NM_013257: | NM_170709:NM_001033578:NM_013257: |
| 8879   | SGPL1    | sphingosine-1-phosphate lyase 1                                          | 0.23   | TGGGTGTGAGGATATACCTAAA  | NM_003901: | NM_003901:                        |
| 8879   | SGPL1    | sphingosine-1-phosphate lyase 1                                          | 0.65   | CAGGCAGGAGGCGTTTACATA   | NM_003901: | NM_003901:                        |
| 81537  | SGPP1    | sphingosine-1-phosphate phosphatase 1                                    | 2.17   | AGAGTTTAACTTTCCATATAA   | NM_030791: | NM_030791:                        |
| 81537  | SGPP1    | sphingosine-1-phosphate phosphatase 1                                    | 0.72   | ATCGGTATATTACTATGAAA    | NM_030791: | NM_030791:                        |
| 6448   | SGSH     | N-sulfoglucosamine sulfohydrolase (sulfamidase)                          | -5.44  | CCGCTCGTGACAACTCTCAA    | NM_000199: | NM_000199:                        |
| 6448   | SGSH     | N-sulfoglucosamine sulfohydrolase (sulfamidase)                          | 0.75   | CCGGCACTGCTGAACCCCTTA   | NM_000199: | NM_000199:                        |
| 6449   | SGTA     | small glutamine-rich tetrapeptide repeat (TPR)-containing, alpha         | -1.88  | AACGAGCAGATGAAAGTGAAA   | NM_003021: | NM_003021:                        |
| 6449   | SGTA     | small glutamine-rich tetrapeptide repeat (TPR)-containing, alpha         | 0.93   | CAGACCTTTCTGAAACGAGA    | NM_003021: | NM_003021:                        |
| 4068   | SH2D1A   | SH2 domain protein 1A, Duncan's disease (lymphoproliferative syndro      | 0.96   | CTGGAAATCTGGATTGTGTA    | NM_002351: | NM_002351:                        |
| 4068   | SH2D1A   | SH2 domain protein 1A, Duncan's disease (lymphoproliferative syndro      | -1.24  | CACCTGCTTTGTTGGACGAGAA  | NM_002351: | NM_002351:                        |
| 10045  | SH2D3A   | SH2 domain containing 3A                                                 | 0.23   | CACCTCTGTTGCGCCCTTAA    | NM_005490: | NM_005490:                        |
| 10045  | SH2D3A   | SH2 domain containing 3A                                                 | -2.01  | AAGGAAGTGGAGCAACAGTCA   | NM_005490: | NM_005490:                        |

|        |          |                                                                           |       |                         |            |                                      |
|--------|----------|---------------------------------------------------------------------------|-------|-------------------------|------------|--------------------------------------|
| 10044  | SH2D3C   | SH2 domain containing 3C                                                  | 0.33  | CCACACCAATGCTGAAGTCAA   | NM_005489: | NM_170600.NM_005489:                 |
| 10044  | SH2D3C   | SH2 domain containing 3C                                                  | -3.51 | CAGGCGAGAGCTACACACACA   | NM_005489: | NM_170600.NM_005489:                 |
| 6452   | SH3BP2   | SH3-domain binding protein 2                                              | 0.26  | TAGGAAGTAACGATCTGCAA    | NM_003023: | NM_003023:                           |
| 6452   | SH3BP2   | SH3-domain binding protein 2                                              | 0.99  | TAGCACCTTATGTGAGGAAA    | NM_003023: | NM_003023:                           |
| 23677  | SH3BP4   | SH3-domain binding protein 4                                              | 0.00  | CAGCTCGTGGCAATCACATA    | NM_014521: | NM_014521:                           |
| 23677  | SH3BP4   | SH3-domain binding protein 4                                              | -1.35 | CAGGCAGAATGTACAGTAATA   | NM_014521: | NM_014521:                           |
| 6455   | SH3GL1   | SH3-domain GRB2-like 1                                                    | -2.80 | ACGCCCTAAGCGGGATATAA    | NM_003025: | NM_003025:                           |
| 6455   | SH3GL1   | SH3-domain GRB2-like 1                                                    | -0.32 | ACGGTCCAGGGCAAACTGAAA   | NM_003025: | NM_003025:                           |
| 30011  | SH3KBP1  | SH3-domain kinase binding protein 1                                       | 1.40  | CTCTGAGATCTCAATGCGAAA   | NM_031892: | NM_031892.NM_001024666:              |
| 30011  | SH3KBP1  | SH3-domain kinase binding protein 1                                       | 0.72  | TAGCTTATATATGACGGTATA   | NM_031892: | NM_031892.NM_001024666:              |
| 81858  | SHARPIN  | SHANK-associated RH domain interactor                                     | -0.17 | AGGCTGCAGGTCACACTTGAA   | NM_030974: | NM_030974:                           |
| 81858  | SHARPIN  | SHANK-associated RH domain interactor                                     | -4.29 | CAGGCTGCAGGTCACACTTGA   | NM_030974: | NM_030974:                           |
| 6462   | SHBG     | sex hormone-binding globulin                                              | -2.37 | CAGGCAGAATCAATCTCCGA    | NM_001040: | NM_001040:                           |
| 6462   | SHBG     | sex hormone-binding globulin                                              | 0.11  | AAGCTGTGATGTAGAATCAA    | NM_001040: | NM_001040:                           |
| 6464   | SHC1     | SHC (Src homology 2 domain containing) transforming protein 1             | 0.68  | AAAGTTGGAGCGGTAACCTAA   | NM_003029: | NM_003029:                           |
| 6464   | SHC1     | SHC (Src homology 2 domain containing) transforming protein 1             | -1.10 | AGCGAAGTGTGTCTACAGCAA   | NM_003029: | NM_183001.NM_003029:                 |
| 6469   | SHH      | sonic hedgehog homolog (Drosophila)                                       | -0.60 | CCCGTGGGCAATGGCGGTCAA   | NM_000193: | NM_000193:                           |
| 6469   | SHH      | sonic hedgehog homolog (Drosophila)                                       | 1.04  | CCAGGGCACCATTCTCATCAA   | NM_000193: | NM_000193:                           |
| 8036   | SHOC2    | soc-2 suppressor of clear homolog (C. elegans)                            | 0.05  | CCCATGGTCTTGAAAACCTTA   | NM_000193: | NM_000193:                           |
| 8036   | SHOC2    | soc-2 suppressor of clear homolog (C. elegans)                            | 0.99  | TACCTTCGTTTAACTGATA     | NM_007373: | NM_007373:                           |
| 257218 | SHPRH    | SNF2 histone linker PHD RING helicase                                     | 0.43  | AAGAGCTTTCATGTACATTTA   | NM_173082: | NM_173082:                           |
| 257218 | SHPRH    | SNF2 histone linker PHD RING helicase                                     | 1.14  | TGGGAGGTGTTAACTCAGAA    | NM_173082: | NM_173082:                           |
| 6476   | SI       | (sucrase-isomaltase (alpha-glucosidase))                                  | 1.56  | CTAACGTATAACGGAAATAAA   | NM_001041: | NM_001041:                           |
| 6476   | SI       | (sucrase-isomaltase (alpha-glucosidase))                                  | -0.45 | ATGCTTCTTATGACACAATAA   | NM_001041: | NM_001041:                           |
| 6477   | SIAH1    | seven in absentia homolog 1 (Drosophila)                                  | 1.20  | CCCATTAATCAGTTCATTAGA   | NM_003031: | NM_001006610.NM_003031:              |
| 6478   | SIAH2    | seven in absentia homolog 2 (Drosophila)                                  | 0.03  | TGGGTGGATTGCTAGGAAA     | NM_005067: | NM_005067:                           |
| 6478   | SIAH2    | seven in absentia homolog 2 (Drosophila)                                  | 0.66  | ACCCGAGGTGCTTATCTTAAA   | NM_005067: | NM_005067:                           |
| 89790  | SIGLEC10 | sialic acid binding Ig-like lectin 10                                     | 1.25  | GGCGGATTAGCAGAAAGTCAA   | NM_033130: | NM_033130:                           |
| 89790  | SIGLEC10 | sialic acid binding Ig-like lectin 10                                     | -0.03 | CCGAGCTGTGAGACATTTAAA   | NM_033130: | NM_033130:                           |
| 114132 | SIGLEC11 | (sialic acid binding Ig-like lectin 11)                                   | 0.23  | CCCGTGTGATGCCATGCTCTT   | NM_052884: | NM_052884:                           |
| 114132 | SIGLEC11 | (sialic acid binding Ig-like lectin 11)                                   | 0.03  | CCCATTAATGGAGCACGAAA    | NM_052884: | NM_052884:                           |
| 89858  | SIGLEC12 | sialic acid binding Ig-like lectin 12                                     | -0.17 | ATGGAACACATATATGACAA    | NM_033329: | NM_033329:                           |
| 89858  | SIGLEC12 | sialic acid binding Ig-like lectin 12                                     | 0.86  | CGGAGACTGATTCCTTTAGAA   | NM_033329: | NM_053003.NM_033329:                 |
| 8778   | SIGLEC5  | sialic acid binding Ig-like lectin 5                                      | -1.84 | CAGGAACGCGATACGCCCTAGA  | NM_003830: | NM_003830:                           |
| 8778   | SIGLEC5  | sialic acid binding Ig-like lectin 5                                      | -0.77 | AAAGGTTTGTGGAAACATTAA   | NM_003830: | NM_003830:                           |
| 946    | SIGLEC6  | sialic acid binding Ig-like lectin 6                                      | 0.49  | CCAGAACTATAATAACATAA    | NM_198846: | NM_198846.NM_198846.NM_001245:       |
| 946    | SIGLEC6  | sialic acid binding Ig-like lectin 6                                      | -1.15 | ACCGAGTGACATAAACACAGA   | NM_198846: | NM_198846.NM_198846.NM_001245:       |
| 27036  | SIGLEC7  | sialic acid binding Ig-like lectin 7                                      | -0.91 | CTGGAGGAGTCTGACCCCTGTA  | NM_014385: | NM_016543.NM_014385:                 |
| 27036  | SIGLEC7  | sialic acid binding Ig-like lectin 7                                      | 0.19  | TAGTGAGATTGTAACGTGAAA   | NM_014385: | NM_016543.NM_014385:                 |
| 27181  | SIGLEC8  | sialic acid binding Ig-like lectin 8                                      | 0.83  | TGCCCTGTATCATATAATTTA   | NM_014442: | NM_014442:                           |
| 27181  | SIGLEC8  | sialic acid binding Ig-like lectin 8                                      | 0.11  | CCGCAACCCAGCTTGCATTTGAA | NM_014442: | NM_014442:                           |
| 27180  | SIGLEC9  | sialic acid binding Ig-like lectin 9                                      | -1.75 | CACACAGGCTTGTAGAGTCAA   | NM_014441: | NM_014441:                           |
| 27180  | SIGLEC9  | sialic acid binding Ig-like lectin 9                                      | 0.18  | TCAAAGTATCTCAAACCTGAA   | NM_014441: | NM_014441:                           |
| 6492   | SIM1     | (single-minded homolog 1 (Drosophila))                                    | 0.37  | TCACCTGGTATCCATTATAA    | NM_005068: | NM_005068:                           |
| 6492   | SIM1     | (single-minded homolog 1 (Drosophila))                                    | 0.93  | CACACTAACTTCTTAAAGCAA   | NM_005068: | NM_005068:                           |
| 6493   | SIM2     | single-minded homolog 2 (Drosophila)                                      | -1.22 | CCGTGATTCCTTAAAGGTTGA   | NM_005069: | NM_005069:                           |
| 6493   | SIM2     | single-minded homolog 2 (Drosophila)                                      | 0.03  | CCGGAAATGCGCACGACCTTA   | NM_005069: | NM_005069:                           |
| 25942  | SIN3A    | SIN3 homolog A, transcription regulator (yeast)                           | -4.29 | CTGGTCACTGAGCACACTCTA   | NM_015477: | NM_015477:                           |
| 25942  | SIN3A    | SIN3 homolog A, transcription regulator (yeast)                           | -1.24 | GAGCGTGAAGCAAGCGCTCTA   | NM_015477: | NM_015477:                           |
| 8487   | SIP1     | survival of motor neuron protein interacting protein 1                    | -0.20 | CCAGATGTTGGTAGAGTCCAA   | NM_003616: | NM_003616.NM_001009183.NM_001009182: |
| 6494   | SIP1A    | signal-induced proliferation-associated gene 1                            | -3.26 | CAGGCGGAGTCTGAGAGTGCA   | NM_006747: | NM_153253.NM_006747:                 |
| 6494   | SIP1A    | signal-induced proliferation-associated gene 1                            | -0.20 | CCGGAAGCGCCACATTTGGCAA  | NM_006747: | NM_153253.NM_006747:                 |
| 10326  | SIRPB1   | signal-regulatory protein beta 1                                          | -1.53 | CTGCTCAATGTCACTTCTATTA  | NM_006065: | NM_006065:                           |
| 10326  | SIRPB1   | signal-regulatory protein beta 1                                          | 0.04  | CAACCTCAGAGTAAATCCCTTA  | NM_006065: | NM_006065:                           |
| 128646 | SIRPD    | signal-regulatory protein delta                                           | 1.02  | CAGGCGCAACCCGAAATTTAA   | NM_178460: | NM_178460:                           |
| 128646 | SIRPD    | signal-regulatory protein delta                                           | -2.65 | CCGSAATTAATCTCAAAATTT   | NM_178460: | NM_178460:                           |
| 55423  | SIRPG    | signal-regulatory protein gamma                                           | 0.63  | CGCCTTGAGACTGACCGTAAA   | NM_018556: | NM_018556:                           |
| 55423  | SIRPG    | signal-regulatory protein gamma                                           | -0.32 | CTGGTGAACATATCTGACCAA   | NM_018556: | NM_018556:                           |
| 23411  | SIRT1    | sirtuin (silent mating type information regulation 2 homolog) 1 (S. cere) | 0.00  | ATAGCTGTTCCTTATGCATAA   | NM_012238: | NM_012238:                           |
| 23411  | SIRT1    | sirtuin (silent mating type information regulation 2 homolog) 1 (S. cere) | 0.52  | CAGGATTAATGTTATTTACGTT  | NM_012238: | NM_012238:                           |
| 22933  | SIRT2    | sirtuin (silent mating type information regulation 2 homolog) 2 (S. cere) | 0.84  | AGGCATGGACTTTGACTCCAA   | NM_012237: | NM_030593.NM_012237:                 |
| 22933  | SIRT2    | sirtuin (silent mating type information regulation 2 homolog) 2 (S. cere) | -2.31 | CAGCGGCTTCTTCTCCCTGTA   | NM_012237: | NM_030593.NM_012237:                 |
| 23410  | SIRT3    | sirtuin (silent mating type information regulation 2 homolog) 3 (S. cere) | 0.98  | TTCACGATGAAATACATTTA    | NM_012239: | NM_001017524.NM_012239:              |
| 23410  | SIRT3    | sirtuin (silent mating type information regulation 2 homolog) 3 (S. cere) | 0.15  | CTGTGCTAGTTGAAACGGCAA   | NM_012239: | NM_001017524.NM_012239:              |
| 23409  | SIRT4    | sirtuin (silent mating type information regulation 2 homolog) 4 (S. cere) | 0.01  | CACCTGGGAGAAACTCGGAAA   | NM_012240: | NM_012240:                           |
| 23409  | SIRT4    | sirtuin (silent mating type information regulation 2 homolog) 4 (S. cere) | 0.56  | CCAGCGGACTGGGGAGAGAAA   | NM_012240: | NM_012240:                           |
| 23408  | SIRT5    | sirtuin (silent mating type information regulation 2 homolog) 5 (S. cere) | -0.19 | CTGGAAAGTAAATTCATATTA   | NM_012241: | NM_012241:                           |
| 23408  | SIRT5    | sirtuin (silent mating type information regulation 2 homolog) 5 (S. cere) | -0.10 | CTGGAGATCCATGGTAGCTTA   | NM_012241: | NM_012241.NM_031244:                 |
| 51548  | SIRT6    | sirtuin (silent mating type information regulation 2 homolog) 6 (S. cere) | 0.14  | CTCCCTGGTCTCCAGCTTAAA   | NM_016539: | NM_016539:                           |
| 51548  | SIRT6    | sirtuin (silent mating type information regulation 2 homolog) 6 (S. cere) | -0.75 | CCGGCTGTGACACCGTGGCTAA  | NM_016539: | NM_016539:                           |
| 51547  | SIRT7    | sirtuin (silent mating type information regulation 2 homolog) 7 (S. cere) | -0.86 | CTCACCTGTTTCTACTACTA    | NM_016538: | NM_016538:                           |
| 51547  | SIRT7    | sirtuin (silent mating type information regulation 2 homolog) 7 (S. cere) | 0.69  | CACCTTTCTGTGAGAACGGAA   | NM_016538: | NM_016538:                           |
| 10572  | SIVA     | CD27-binding (Siva) protein                                               | 0.16  | TCCTAATGACAGAAATGAATA   | NM_006427: | NM_021709.NM_006427:                 |
| 10572  | SIVA     | CD27-binding (Siva) protein                                               | 0.53  | CAGAATGAATAAACCTCTTTA   | NM_006427: | NM_021709.NM_006427:                 |
| 6496   | SIX3     | sine oculis homeobox homolog 3 (Drosophila)                               | 1.61  | CTGCATGACGATTTATTTGTA   | NM_005413: | NM_005413:                           |
| 6496   | SIX3     | sine oculis homeobox homolog 3 (Drosophila)                               | 0.65  | CCCAACCATACACATACAAA    | NM_005413: | NM_005413:                           |
| 6497   | SKI      | v-ski sarcoma viral oncogene homolog (avian)                              | -0.32 | CCGACTTTATGAGCAGTCAA    | NM_003036: | NM_003036:                           |
| 6497   | SKI      | v-ski sarcoma viral oncogene homolog (avian)                              | 0.76  | GCGAGTGTGTTGTAACCATGTA  | NM_003036: | NM_003036:                           |
| 6498   | SKIL     | SKI-like                                                                  | 0.64  | AGGCAAGTAAAGTCCATACAA   | NM_005414: | NM_005414:                           |
| 6498   | SKIL     | SKI-like                                                                  | -0.03 | CGCGGGCAGAGATTAATTTAA   | NM_005414: | NM_005414:                           |
| 51763  | SKIP     | skeletal muscle and kidney enriched inositol phosphatase                  | -1.19 | CAGCCAAGTGTCTCCACATA    | NM_016532: | NM_130766.NM_016532:                 |
| 51763  | SKIP     | skeletal muscle and kidney enriched inositol phosphatase                  | -1.91 | CTGGAATTAGCCGCTTAAATA   | NM_016532: | NM_130766.NM_016532:                 |
| 80309  | SPHK1    | (sphingosine kinase type 1) interacting protein                           | -2.55 | CTGAAATCTGGACACCTTAA    | XM_051221: | NM_030623:                           |
| 80309  | SPHK1    | (sphingosine kinase type 1) interacting protein                           | 1.25  | GGCAAGTATGCTACAAATTTA   | XM_051221: | NM_030623:                           |
| 6500   | SKP1A    | S-phase kinase-associated protein 1A (p19A)                               | 0.49  | AAAGTTGGCAATGTAATAATA   | NM_006930: | NM_006930.NM_006930:                 |
| 6500   | SKP1A    | S-phase kinase-associated protein 1A (p19A)                               | 1.10  | AGGCTACTTTAGAGCAACTTA   | NM_006930: | NM_006930:                           |
| 6502   | SKP2     | S-phase kinase-associated protein 2 (p45)                                 | 0.19  | AAGTGATAGTGTCACTGCTAAA  | NM_005983: | NM_032637.NM_005983:                 |
| 6502   | SKP2     | S-phase kinase-associated protein 2 (p45)                                 | -0.41 | ACCCCTCAACTGTTAAAGGAA   | NM_005983: | NM_005983:                           |
| 6503   | SLA      | Src-like-adapter                                                          | 0.56  | CCCGTACTTTTATTTAAGAA    | NM_006748: | NM_006748:                           |
| 6503   | SLA      | Src-like-adapter                                                          | -3.22 | CTGGATCGGGTAGGTAAGAAT   | NM_006748: | NM_006748:                           |
| 84174  | SLA2     | Src-like-adapter 2                                                        | -0.01 | CAGGTCTCAATTAAGATTTT    | NM_032214: | NM_175077.NM_032214:                 |
| 84174  | SLA2     | Src-like-adapter 2                                                        | 0.95  | CATCAACAGGTTCTGAATTTA   | NM_032214: | NM_175077.NM_032214:                 |
| 6504   | SLAMF1   | signaling lymphocytic activation molecule family member 1                 | 0.81  | AACAATTTCCATCAGCTGTA    | NM_003037: | NM_003037:                           |
| 6504   | SLAMF1   | signaling lymphocytic activation molecule family member 1                 | -1.44 | CAGAGTCTGTCCAGGAAACAA   | NM_003037: | NM_003037:                           |
| 114836 | SLAMF6   | SLAM family member 6                                                      | 0.48  | CACAATTTACTCCACAAATTTA  | NM_052931: | NM_052931:                           |
| 114836 | SLAMF6   | SLAM family member 6                                                      | 0.21  | CAGGGAATGATGTTTACAAA    | NM_052931: | NM_052931:                           |
| 57823  | SLAMF7   | SLAM family member 7                                                      | 0.46  | CACATAAGAACAATCCTAAA    | NM_021181: | NM_021181:                           |
| 57823  | SLAMF7   | SLAM family member 7                                                      | 0.46  | AACAGATATTGTGAGATTCAA   | NM_021181: | NM_021181:                           |
| 56833  | SLAMF8   | SLAM family member 8                                                      | -1.39 | ACCATGGACTTTGGTATGGAA   | NM_020125: | NM_020125:                           |

|        |          |                                                                            |       |                        |            |                                                  |
|--------|----------|----------------------------------------------------------------------------|-------|------------------------|------------|--------------------------------------------------|
| 56833  | SLAMF8   | SLAM family member 8                                                       | -0.22 | CACCTGGGAATCAGTAGTCAA  | NM_020125: | NM_020125:                                       |
| 89886  | SLAMF9   | SLAM family member 9                                                       | -2.47 | CTGGCTGGCAATAAAGTCAA   | NM_033438: | NM_033438:                                       |
| 89886  | SLAMF9   | SLAM family member 9                                                       | -2.50 | TCAGGGCTTTACCAAGCTCAA  | NM_033438: | NM_033438:                                       |
| 6554   | SLC10A1  | solute carrier family 10 (sodium/bile acid cotransporter family), memb     | -0.62 | CACAAGTGGCTAGAAATTA    | NM_003049: | NM_003049:                                       |
| 6554   | SLC10A1  | solute carrier family 10 (sodium/bile acid cotransporter family), memb     | 1.73  | AGGGATCGTCTCAAATCCAA   | NM_003049: | NM_003049:                                       |
| 6555   | SLC10A2  | solute carrier family 10 (sodium/bile acid cotransporter family), memb     | 1.37  | GCCTCTGAGATCATATTAA    | NM_000452: | NM_000452:                                       |
| 6555   | SLC10A2  | solute carrier family 10 (sodium/bile acid cotransporter family), memb     | -0.15 | CTCCTACACATTCCCATCAA   | NM_000452: | NM_000452:                                       |
| 8273   | SLC10A3  | solute carrier family 10 (sodium/bile acid cotransporter family), memb     | -0.19 | CATGGTGTAAATGCAGGACAA  | NM_019848: | NM_019848:                                       |
| 8273   | SLC10A3  | solute carrier family 10 (sodium/bile acid cotransporter family), memb     | -0.32 | GCGGAGAGACTTCTGCATCAA  | NM_019848: | NM_019848:                                       |
| 201780 | SLC10A4  | solute carrier family 10 (sodium/bile acid cotransporter family), memb     | -6.72 | ACCAACGCTTGTCACAAATTA  | NM_152679: | NM_152679:                                       |
| 201780 | SLC10A4  | solute carrier family 10 (sodium/bile acid cotransporter family), memb     | -0.80 | ACCGCTGAGACTTCTCTCAA   | NM_152679: | NM_152679:                                       |
| 347051 | SLC10A5  | solute carrier family 10 (sodium/bile acid cotransporter family), memb     | 0.09  | ATCAATTTGGAATAGTCATCAA | XM_376781: | NM_001010893:                                    |
| 347051 | SLC10A5  | solute carrier family 10 (sodium/bile acid cotransporter family), memb     | 0.02  | ATGCGTGTCAATTCATATA    | XM_376781: | NM_001010893:                                    |
| 345274 | SLC10A6  | solute carrier family 10 (sodium/bile acid cotransporter family), memb     | -0.96 | TTGCAGCATACAGACGTACA   | NM_197965: | NM_197965:                                       |
| 345274 | SLC10A6  | solute carrier family 10 (sodium/bile acid cotransporter family), memb     | 0.83  | CAGCTGATAGATGGATTCTT   | NM_197965: | NM_197965:                                       |
| 6557   | SLC12A1  | solute carrier family 12 (sodium/potassium/chloride transporters), men     | -0.14 | CTGGTATTGGATATAAGAAA   | NM_000338: | NM_000338:                                       |
| 6557   | SLC12A1  | solute carrier family 12 (sodium/potassium/chloride transporters), men     | 0.15  | ACCAATGCACATCCGGATTATA | NM_000338: | NM_000338:                                       |
| 6558   | SLC12A2  | solute carrier family 12 (sodium/potassium/chloride transporters), men     | -1.20 | CAGAGTATTCATTGGTGGAAA  | NM_001046: | NM_001046:                                       |
| 6558   | SLC12A2  | solute carrier family 12 (sodium/potassium/chloride transporters), men     | -0.37 | CAGGATTTACACCCTAATTT   | NM_001046: | NM_001046:                                       |
| 6559   | SLC12A3  | solute carrier family 12 (sodium/chloride transporters), member 3          | -3.97 | CAGGATGGACCAGAGAGAAA   | NM_000339: | NM_000339:                                       |
| 6559   | SLC12A3  | solute carrier family 12 (sodium/chloride transporters), member 3          | -0.18 | CAAGAAGCCATAGACATCTA   | NM_000339: | NM_000339:                                       |
| 84561  | SLC12A8  | solute carrier family 12 (potassium/chloride transporters), member 8       | -0.17 | CAAGCATAAAGTGTATCTCTA  | NM_024628: | NM_024628:                                       |
| 84561  | SLC12A8  | solute carrier family 12 (potassium/chloride transporters), member 8       | -0.42 | CTCGAGGTGTCAAATGGATA   | NM_024628: | NM_024628:                                       |
| 56996  | SLC12A9  | solute carrier family 12 (potassium/chloride transporters), member 9       | -0.25 | CTGGTGTGATCGGAATCTAT   | NM_020246: | NM_020246:                                       |
| 56996  | SLC12A9  | solute carrier family 12 (potassium/chloride transporters), member 9       | 0.57  | CCGACTGGTGTGATCGGAAT   | NM_020246: | NM_020246:                                       |
| 64849  | SLC13A3  | solute carrier family 13 (sodium-dependent dicarboxylate transporter),     | 0.49  | CAGATGAATCATGATTCTCTA  | NM_022829: | NM_022829:NM_001011554:                          |
| 64849  | SLC13A3  | solute carrier family 13 (sodium-dependent dicarboxylate transporter),     | 0.75  | CCGAGTATTACTTTTGATTA   | NM_022829: | NM_022829:NM_001011554:                          |
| 6572   | SLC18A3  | solute carrier family 18 (vesicular acetylcholine), member 3               | 0.22  | TACGGAGAGCGAAGACGTGAA  | NM_003055: | NM_003055:                                       |
| 6572   | SLC18A3  | solute carrier family 18 (vesicular acetylcholine), member 3               | -2.62 | CTGCTTGTAGGACCCGCCAA   | NM_003055: | NM_003055:                                       |
| 10560  | SLC19A2  | solute carrier family 19 (thiamine transporter), member 2                  | -0.16 | CTGCCITTTTCTTAAAGTATA  | NM_006996: | NM_006996:                                       |
| 10560  | SLC19A2  | solute carrier family 19 (thiamine transporter), member 2                  | 0.01  | AAGGTGTACGTATCATTTCTA  | NM_006996: | NM_006996:                                       |
| 6505   | SLC1A1   | solute carrier family 1 (neuronal/epithelial high affinity glutamate trans | -0.38 | ACGACCTACATCTGAAATCTA  | NM_004170: | NM_004170:                                       |
| 6505   | SLC1A1   | solute carrier family 1 (neuronal/epithelial high affinity glutamate trans | -1.15 | GAGGACTGTCTTAACATAGTAA | NM_004170: | NM_004170:                                       |
| 6509   | SLC1A4   | solute carrier family 1 (glutamate/neutral amino acid transporter), men    | 0.28  | CAGCCTTAGGTAAGCAACTTA  | NM_003038: | NM_003038:                                       |
| 6509   | SLC1A4   | solute carrier family 1 (glutamate/neutral amino acid transporter), men    | 0.97  | CCGCACATTTGCAAGTTGAAA  | NM_003038: | NM_003038:                                       |
| 6510   | SLC1A5   | solute carrier family 1 (neutral amino acid transporter), member 5         | -0.99 | CACCGTGCCGCTGATGATGAA  | NM_005628: | NM_005628:                                       |
| 6510   | SLC1A5   | solute carrier family 1 (neutral amino acid transporter), member 5         | 1.87  | CAGCCTTTGCTCATACTCTA   | NM_005628: | NM_005628:                                       |
| 6574   | SLC20A1  | solute carrier family 20 (phosphate transporter), member 1                 | 0.00  | CAAGCCGTCAGCAACCAATA   | NM_005415: | NM_005415:                                       |
| 6574   | SLC20A1  | solute carrier family 20 (phosphate transporter), member 1                 | -1.50 | CAGCTCGTTTTCTGTGCCGTA  | NM_005415: | NM_005415:                                       |
| 6575   | SLC20A2  | solute carrier family 20 (phosphate transporter), member 2                 | 0.84  | TGCTAGAAAGTCAATATTGAA  | NM_006749: | NM_006749:                                       |
| 6575   | SLC20A2  | solute carrier family 20 (phosphate transporter), member 2                 | 0.39  | TGCGATTACTTATATATAAAA  | NM_006749: | NM_006749:                                       |
| 51310  | SLC22A17 | solute carrier family 22 (organic cation transporter), member 17           | 0.52  | AACATCCTCTTTTCTTTTTC   | NM_020372: | NM_016609:NM_020372:                             |
| 51310  | SLC22A17 | solute carrier family 22 (organic cation transporter), member 17           | 0.73  | AAGGCTGCCATCCACCCTTTC  | NM_020372: | NM_016609:NM_020372:                             |
| 5002   | SLC22A18 | solute carrier family 22 (organic cation transporter), member 18           | 0.10  | CAGACACAGACTGGCAATAAA  | NM_002555: | NM_183233:NM_002555:                             |
| 5002   | SLC22A18 | solute carrier family 22 (organic cation transporter), member 18           | 1.42  | CACGTCGAGGTGCTATCAAT   | NM_002555: | NM_183233:NM_002555:                             |
| 10864  | SLC22A7  | solute carrier family 22 (organic anion transporter), member 7             | 0.47  | CAGAGGCTGAAATCAATAAA   | NM_006672: | NM_006672:NM_153320:                             |
| 10864  | SLC22A7  | solute carrier family 22 (organic anion transporter), member 7             | -0.08 | CTCAATGAGTACTGAATATA   | NM_006672: | NM_006672:NM_153320:                             |
| 9187   | SLC24A1  | solute carrier family 24 (sodium/potassium/calcium exchanger), memb        | 0.82  | CTCAGCAGATTATGATGGTAAA | NM_004727: | NM_004727:                                       |
| 9187   | SLC24A1  | solute carrier family 24 (sodium/potassium/calcium exchanger), memb        | 0.02  | CACAATGGGCATGGATCAGAAA | NM_004727: | NM_004727:                                       |
| 25769  | SLC24A2  | solute carrier family 24 (sodium/potassium/calcium exchanger), memb        | 0.01  | AAGCGGAGTCTGAGAAATAGTA | NM_020344: | NM_020344:                                       |
| 25769  | SLC24A2  | solute carrier family 24 (sodium/potassium/calcium exchanger), memb        | -0.19 | AAGATTCTGGATTACTCCCA   | NM_020344: | NM_020344:                                       |
| 57419  | SLC24A3  | solute carrier family 24 (sodium/potassium/calcium exchanger), memb        | 2.06  | CAGAGCTAAGACACACTTATT  | NM_020689: | NM_020689:                                       |
| 57419  | SLC24A3  | solute carrier family 24 (sodium/potassium/calcium exchanger), memb        | -0.48 | CACCATGCTGTTCACTTGTA   | NM_020689: | NM_020689:                                       |
| 123041 | SLC24A4  | solute carrier family 24 (sodium/potassium/calcium exchanger), memb        | 0.27  | TCCGATTTGATGCACTTTGAAA | NM_153646: | NM_153646:NM_153646:NM_153648:                   |
| 123041 | SLC24A4  | solute carrier family 24 (sodium/potassium/calcium exchanger), memb        | -0.18 | TCCAGTTATATATAGCCCAA   | NM_153646: | NM_153646:NM_153646:NM_153648:                   |
| 283652 | SLC24A5  | solute carrier family 24, member 5                                         | -5.10 | TGCGCTGGTTTTGCTATCTA   | NM_205850: | NM_205850:                                       |
| 283652 | SLC24A5  | solute carrier family 24, member 5                                         | -3.26 | ATGGATATCCGCAATTCACATA | NM_205850: | NM_205850:                                       |
| 80024  | SLC24A6  | solute carrier family 24 (sodium/potassium/calcium exchanger), memb        | 0.92  | CGGCTTATGTTCCGCAATAA   | NM_024959: | NM_024959:                                       |
| 80024  | SLC24A6  | solute carrier family 24 (sodium/potassium/calcium exchanger), memb        | 1.22  | CGGGTATCTTCAATACCAA    | NM_024959: | NM_024959:                                       |
| 6576   | SLC25A1  | solute carrier family 25 (mitochondrial carrier; citrate transporter), men | -0.07 | AAACACTCCTCTGGATGTGAT  | NM_005984: | NM_005984:                                       |
| 6576   | SLC25A1  | solute carrier family 25 (mitochondrial carrier; citrate transporter), men | -1.07 | AAAGCCCATGAAACCCCTCGAT | NM_005984: | NM_005984:                                       |
| 8402   | SLC25A11 | solute carrier family 25 (mitochondrial carrier; oxoglutarate carrier), me | -0.77 | TTGATTGATGACACCAGCAA   | NM_003562: | NM_003562:                                       |
| 8402   | SLC25A11 | solute carrier family 25 (mitochondrial carrier; oxoglutarate carrier), me | -0.81 | CGGGCTGGACGCTGTGTTCAA  | NM_003562: | NM_003562:                                       |
| 8604   | SLC25A12 | solute carrier family 25 (mitochondrial carrier, Aralar), member 12        | -0.75 | TCCGAAATTTAAGTCTCCTA   | NM_003705: | NM_003705:                                       |
| 8604   | SLC25A12 | solute carrier family 25 (mitochondrial carrier, Aralar), member 12        | -0.62 | CCGAGTCTGCTTACAGATTCA  | NM_003705: | NM_003705:                                       |
| 10165  | SLC25A13 | solute carrier family 25, member 13 (citrin)                               | -1.23 | CAGTATCTACCTCAAGGCCATA | NM_014251: | NM_014251:                                       |
| 10165  | SLC25A13 | solute carrier family 25, member 13 (citrin)                               | 0.28  | TAGCAGATTTATATAGCCCAA  | NM_014251: | NM_014251:                                       |
| 9016   | SLC25A14 | solute carrier family 25 (mitochondrial carrier, brain), member 14         | -0.58 | ACCAGTCTATGATATTACTAA  | NM_003951: | NM_022810:NM_003951:                             |
| 9016   | SLC25A14 | solute carrier family 25 (mitochondrial carrier, brain), member 14         | 1.29  | ACCGATGTTCTAAGATTCCGA  | NM_003951: | NM_022810:NM_003951:                             |
| 10166  | SLC25A15 | solute carrier family 25 (mitochondrial carrier; ornithine transporter) m  | 0.56  | AGGCCGTCCATTAGAGATTATA | NM_014252: | NM_014252:                                       |
| 10166  | SLC25A15 | solute carrier family 25 (mitochondrial carrier; ornithine transporter) m  | -0.06 | ATAGGCCTGGATCGAAGTAAA  | NM_014252: | NM_014252:                                       |
| 8034   | SLC25A16 | solute carrier family 25 (mitochondrial carrier; Graves disease autoant    | -0.61 | CAGGTCAATGACACAGATTAA  | NM_152707: | NM_152707:                                       |
| 8034   | SLC25A16 | solute carrier family 25 (mitochondrial carrier; Graves disease autoant    | 0.79  | AGGGTGGTTATATATGCAATA  | NM_152707: | NM_152707:                                       |
| 10478  | SLC25A17 | solute carrier family 25 (mitochondrial carrier; peroxisomal membrane      | 1.35  | ACCCAAATGATTCTCTTATAA  | NM_006358: | NM_006358:                                       |
| 10478  | SLC25A17 | solute carrier family 25 (mitochondrial carrier; peroxisomal membrane      | -3.21 | CTGACCTGTGTGCACCTTAA   | NM_006358: | NM_006358:                                       |
| 60386  | SLC25A19 | solute carrier family 25 (mitochondrial deoxynucleotide carrier), memb     | 1.77  | ACCTATTTAATAGACATTAAA  | NM_021734: | NM_021734:                                       |
| 60386  | SLC25A19 | solute carrier family 25 (mitochondrial deoxynucleotide carrier), memb     | 0.29  | AACCTATTTAATAGACATTAAA | NM_021734: | NM_021734:                                       |
| 83884  | SLC25A2  | solute carrier family 25 (mitochondrial carrier; ornithine transporter) m  | 0.24  | CCCTATGTACCTAATCTGAATA | NM_031947: | NM_031947:                                       |
| 83884  | SLC25A2  | solute carrier family 25 (mitochondrial carrier; ornithine transporter) m  | 1.00  | TACCCTAAATCTTAACTTTAT  | NM_031947: | NM_031947:                                       |
| 788    | SLC25A20 | solute carrier family 25 (carnitine/acylcarnitine translocase), member 2   | -1.73 | AAGGAGTAGTAAAGCAGAACTA | NM_000387: | NM_000387:                                       |
| 788    | SLC25A20 | solute carrier family 25 (carnitine/acylcarnitine translocase), member 2   | -1.92 | CAGCTAGTGAATGATTTTCAA  | NM_000387: | NM_000387:                                       |
| 79085  | SLC25A23 | solute carrier family 25 (mitochondrial carrier; phosphate carrier), men   | -8.66 | CGGCTTCTCATGACATGAAA   | NM_024103: | NM_024103:                                       |
| 79085  | SLC25A23 | solute carrier family 25 (mitochondrial carrier; phosphate carrier), men   | -6.86 | CGGACGAGGTTCTCAAAGCAA  | NM_024103: | NM_024103:                                       |
| 29957  | SLC25A24 | solute carrier family 25 (mitochondrial carrier; phosphate carrier), men   | 0.55  | CGGAGGTTGAAAGATGATATA  | NM_013386: | NM_013386:NM_213651:                             |
| 29957  | SLC25A24 | solute carrier family 25 (mitochondrial carrier; phosphate carrier), men   | -0.74 | CTGACTATTTCTGAACAACAAA | NM_013386: | NM_013386:NM_213651:                             |
| 114789 | SLC25A25 | solute carrier family 25 (mitochondrial carrier; phosphate carrier), men   | 0.74  | GACGTTAGAAGTTGCAATTA   | NM_052901: | NM_052901:NM_001006641:NM_001006643:NM_01006642: |
| 114789 | SLC25A25 | solute carrier family 25 (mitochondrial carrier; phosphate carrier), men   | 0.85  | CAGAGTTATGCTCAACTATT   | NM_052901: | NM_052901:NM_001006641:NM_001006643:NM_01006642: |
| 9481   | SLC25A27 | solute carrier family 25, member 27                                        | 1.41  | ATGAATCAACACAGAGATAAA  | NM_004277: | NM_004277:                                       |
| 9481   | SLC25A27 | solute carrier family 25, member 27                                        | 0.88  | CTCAGGTTTATCAAGTTTAT   | NM_004277: | NM_004277:                                       |
| 123096 | SLC25A29 | solute carrier family 25, member 29                                        | 0.04  | CTCAGGCTGCTGCTCCATAAA  | NM_152333: | NM_152333:                                       |
| 123096 | SLC25A29 | solute carrier family 25, member 29                                        | -0.78 | CACCGTTATCTGGAACCTGA   | NM_152333: | NM_152333:                                       |
| 83447  | SLC25A31 | solute carrier family 25 (mitochondrial carrier; adenine nucleotide tran   | 0.68  | ATGGTATGACATATTTCTTAA  | NM_031291: | NM_031291:                                       |
| 83447  | SLC25A31 | solute carrier family 25 (mitochondrial carrier; adenine nucleotide tran   | 1.07  | TGGGAGAGTAAATTAAGAAA   | NM_031291: | NM_031291:                                       |
| 81034  | SLC25A32 | solute carrier family 25, member 32                                        | -4.05 | ATGAGTCAATGAGACATCTA   | NM_030780: | NM_030780:                                       |
| 81034  | SLC25A32 | solute carrier family 25, member 32                                        | 2.39  | TGGATCTAGATCCCAATAAAA  | NM_030780: | NM_030780:                                       |
| 55186  | SLC25A36 | solute carrier family 25, member 36                                        | 0.42  | AACCAATGAAATAGCGTCTAA  | NM_018155: | NM_018155:                                       |
| 55186  | SLC25A36 | solute carrier family 25, member 36                                        | -0.28 | TGGCTTTGGTAAATGTGAAA   | NM_018155: | NM_018155:                                       |

|        |              |                                                                          |       |                        |               |                                   |
|--------|--------------|--------------------------------------------------------------------------|-------|------------------------|---------------|-----------------------------------|
| 291    | SLC25A4      | solute carrier family 25 (mitochondrial carrier; adenine nucleotide tran | 0.18  | CTGAATGTGAAACATCAATAA  | NM_001151:    | NM_001151:                        |
| 291    | SLC25A4      | solute carrier family 25 (mitochondrial carrier; adenine nucleotide tran | -0.78 | CAGATCCATTGTGTGGTTTAA  | NM_001151:    | NM_001151:                        |
| 292    | SLC25A5      | solute carrier family 25 (mitochondrial carrier; adenine nucleotide tran | 0.94  | ATGTTGATTTATAACACAAA   | NM_001152:    | NM_001152:                        |
| 292    | SLC25A5      | solute carrier family 25 (mitochondrial carrier; adenine nucleotide tran | -1.57 | CGGAAGATTGCTCGTGATGAA  | NM_001152:    | NM_001152:                        |
| 293    | SLC25A6      | solute carrier family 25 (mitochondrial carrier; adenine nucleotide tran | 0.76  | AACCAAGAGAACCACCGTAGAA | NM_001636:    | NM_001636:                        |
| 293    | SLC25A6      | solute carrier family 25 (mitochondrial carrier; adenine nucleotide tran | 0.89  | AACAGAGGACGCAGAGGTCAAA | NM_001636:    | NM_001636:                        |
| 1836   | SLC26A2      | solute carrier family 26 (sulfate transporter), member 2                 | 0.43  | ACCAATCTATGTAATAGGCTA  | NM_000112:    | NM_000112:                        |
| 1836   | SLC26A2      | solute carrier family 26 (sulfate transporter), member 2                 | -0.58 | CTGGTATGCCTCTACACAATA  | NM_000112:    | NM_000112:                        |
| 1811   | SLC26A3      | solute carrier family 26, member 3                                       | -0.11 | ATGCATAGGTTTAGCAGTATA  | NM_000111:    | NM_000111:                        |
| 1811   | SLC26A3      | solute carrier family 26, member 3                                       | 0.21  | TTGGCTTTAGTCCACTTCGAA  | NM_000111:    | NM_000111:                        |
| 5172   | SLC26A4      | solute carrier family 26, member 4                                       | 1.25  | AAGAGTGAATGTAATAGTCTT  | NM_000441:    | NM_000441:                        |
| 5172   | SLC26A4      | solute carrier family 26, member 4                                       | 0.35  | TCACGAATGATTAATCATAAA  | NM_000441:    | NM_000441:                        |
| 6513   | SLC2A1       | solute carrier family 2 (facilitated glucose transporter), member 1      | 0.19  | CAGGCTTGAATCGCATTATT   | NM_006516:    | NM_006516:                        |
| 6513   | SLC2A1       | solute carrier family 2 (facilitated glucose transporter), member 1      | 0.21  | CAGACACTAAGTTATAGTATA  | NM_006516:    | NM_006516:                        |
| 6514   | SLC2A2       | solute carrier family 2 (facilitated glucose transporter), member 2      | 0.30  | CAGGCTTGAATCGCATTATT   | NM_000340:    | NM_000340:                        |
| 6514   | SLC2A2       | solute carrier family 2 (facilitated glucose transporter), member 2      | 1.27  | CAGACTTTAGCTTACAGTCAA  | NM_000340:    | NM_000340:                        |
| 6517   | SLC2A4       | solute carrier family 2 (facilitated glucose transporter), member 4      | -3.81 | CACCTTGGACTCTCCACAAA   | NM_001042:    | NM_001042:                        |
| 6517   | SLC2A4       | solute carrier family 2 (facilitated glucose transporter), member 4      | -0.21 | ACGCTGCTGCTCCTATGAAA   | NM_001042:    | NM_001042:                        |
| 347734 | SLC35B2      | solute carrier family 35, member B2                                      | -0.06 | CAGCTTTATGCTACTCGCTA   | NM_178148:    | NM_178148:                        |
| 347734 | SLC35B2      | solute carrier family 35, member B2                                      | 1.30  | CCCGATGTGGCAGGCCCTGAAA | NM_178148:    | NM_178148:                        |
| 51006  | SLC35C2      | solute carrier family 35, member C2                                      | 0.17  | CTCGCTGACACAATGACCAAA  | NM_015945:    | NM_173073;NM_015945;NM_173179:    |
| 51006  | SLC35C2      | solute carrier family 35, member C2                                      | -0.39 | CAGGAAATAAATGAAATGTTTA | NM_015945:    | NM_173073;NM_015945;NM_173179:    |
| 54407  | SLC38A2      | solute carrier family 38, member 2                                       | -0.99 | CTCATCAGCGATAATGTCTAAA | NM_018976:    | NM_018976:                        |
| 54407  | SLC38A2      | solute carrier family 38, member 2                                       | -0.12 | TACGAACATGTTGAGTCAGAA  | NM_018976:    | NM_018976:                        |
| 25800  | SLC39A6      | solute carrier family 39 (zinc transporter), member 6                    | -0.23 | CTGGTTGATATGGTACCTGAA  | NM_012319:    | NM_012319:                        |
| 25800  | SLC39A6      | solute carrier family 39 (zinc transporter), member 6                    | -0.16 | AAGGCTTATCAAGTGGTTTAA  | NM_012319:    | NM_012319:                        |
| 6519   | SLC3A1       | solute carrier family 3 (cystine, dibasic and neutral amino acid transpo | 0.52  | CCGGCAGACCATGGACCAATA  | NM_000341:    | NM_000341:                        |
| 6519   | SLC3A1       | solute carrier family 3 (cystine, dibasic and neutral amino acid transpo | -1.17 | CCCGACACCGGTCCACACAATA | NM_000341:    | NM_000341:                        |
| 30061  | SLC40A1      | solute carrier family 40 (iron-regulated transporter), member 1          | -1.01 | AACGTTTATATGCACTTTCA   | NM_014585:    | NM_014585:                        |
| 30061  | SLC40A1      | solute carrier family 40 (iron-regulated transporter), member 1          | 1.55  | CAGATCTTATCTGCTAGATA   | NM_014585:    | NM_014585:                        |
| 51151  | SLC45A2      | solute carrier family 45, member 2                                       | -0.62 | ATGACGGCCTTCTGTCCAAA   | NM_016180:    | NM_001012509;NM_016180:           |
| 51151  | SLC45A2      | solute carrier family 45, member 2                                       | 0.53  | TGCGAGGGCAATGACATTAAA  | NM_016180:    | NM_001012509;NM_016180:           |
| 6521   | SLC4A1       | solute carrier family 4, anion exchanger, member 1 (erythrocyte memt     | -1.84 | CCGCTTCTGCTTCTGTTCAA   | NM_000342:    | NM_000342:                        |
| 6521   | SLC4A1       | solute carrier family 4, anion exchanger, member 1 (erythrocyte memt     | -5.54 | CAGGATACCTACACCACGAAA  | NM_000342:    | NM_000342:                        |
| 57282  | SLC4A10 (sol | solute carrier family 4, sodium bicarbonate transporter-like, member 1   | -0.20 | TAGCTTAGCATTAGTGACTTA  | NM_022058:    | NM_022058:                        |
| 57282  | SLC4A10 (sol | solute carrier family 4, sodium bicarbonate transporter-like, member 1   | 0.44  | CACAGGCATCGTGGTCAATAA  | NM_022058:    | NM_022058:                        |
| 8671   | SLC4A4       | solute carrier family 4, sodium bicarbonate cotransporter, member 4      | 1.51  | CTGTGATATATCCTAACTATA  | NM_003759:    | NM_003759:                        |
| 8671   | SLC4A4       | solute carrier family 4, sodium bicarbonate cotransporter, member 4      | 0.41  | TAACGTGGTATTAAAGGTAA   | NM_003759:    | NM_003759:                        |
| 9497   | SLC4A7       | solute carrier family 4, sodium bicarbonate cotransporter, member 7      | 1.86  | ATAGAGTAAATGTTAATGTA   | NM_003615:    | NM_003615:                        |
| 9497   | SLC4A7       | solute carrier family 4, sodium bicarbonate cotransporter, member 7      | -0.74 | CCGTGGAGACTATGATTTTAA  | NM_003615:    | NM_003615:                        |
| 9498   | SLC4A8       | solute carrier family 4, sodium bicarbonate cotransporter, member 8      | 1.93  | GACGCTATCTTAAAGTTTAT   | NM_004858:    | NM_004858:                        |
| 9498   | SLC4A8       | solute carrier family 4, sodium bicarbonate cotransporter, member 8      | -1.53 | AGCGCTATTTAAACAGGAA    | NM_004858:    | NM_004858:                        |
| 83697  | SLC4A9       | solute carrier family 4, sodium bicarbonate cotransporter, member 9      | -1.80 | TAGGTTGAAGCTGTTTGTAT   | NM_031467:    | NM_031467:                        |
| 83697  | SLC4A9       | solute carrier family 4, sodium bicarbonate cotransporter, member 9      | -0.19 | CAGCAGCTTCACTTCACTAA   | NM_031467:    | NM_031467:                        |
| 6523   | SLC5A1       | solute carrier family 5 (sodium/glucose cotransporter), member 1         | -0.55 | GAGGACAGTTTGAACGCTAA   | NM_000343:    | NM_000343:                        |
| 6523   | SLC5A1       | solute carrier family 5 (sodium/glucose cotransporter), member 1         | 0.03  | AAGGAGACCATTGAAATGAAA  | NM_000343:    | NM_000343:                        |
| 6528   | SLC5A5       | solute carrier family 5 (sodium iodide symporter), member 5              | 0.03  | CTGGATTGCCTGTATGCAAAA  | NM_000453:    | NM_000453:                        |
| 6528   | SLC5A5       | solute carrier family 5 (sodium iodide symporter), member 5              | -3.79 | CAGCTTCTATGCCATCTCCTA  | NM_000453:    | NM_000453:                        |
| 6529   | SLC6A1       | solute carrier family 6 (neurotransmitter transporter, GABA), member 1   | 1.91  | CGGGCGTTATGTAAGTTCTTA  | NM_003042:    | NM_003042:                        |
| 6529   | SLC6A1       | solute carrier family 6 (neurotransmitter transporter, GABA), member 1   | 0.70  | CACGTAAGGCTCATTTTGATA  | NM_003042:    | NM_003042:                        |
| 6538   | SLC6A11      | solute carrier family 6 (neurotransmitter transporter, GABA), member 1   | -0.02 | CCACCGGATGGTACAGTTTAA  | NM_014229:    | NM_014229:                        |
| 6538   | SLC6A11      | solute carrier family 6 (neurotransmitter transporter, GABA), member 1   | -0.71 | CCGGCCACCGTCCGCTATTTAA | NM_014229:    | NM_014229:                        |
| 6539   | SLC6A12      | solute carrier family 6 (neurotransmitter transporter, betaine/GABA), m  | -3.72 | CAGGCCAGTGTCTCCCACTTA  | NM_003044:    | NM_003044:                        |
| 6539   | SLC6A12      | solute carrier family 6 (neurotransmitter transporter, betaine/GABA), m  | 0.92  | AAGCCGATTTGCTAACTGA    | NM_003044:    | NM_003044:                        |
| 6540   | SLC6A13      | solute carrier family 6 (neurotransmitter transporter, GABA), member 1   | 0.26  | CTCATCTTCACTTCACTTAA   | NM_016615:    | NM_016615:                        |
| 6540   | SLC6A13      | solute carrier family 6 (neurotransmitter transporter, GABA), member 1   | -0.39 | TCCGCTGACCTACAACAAGAA  | NM_016615:    | NM_016615:                        |
| 11254  | SLC6A14      | solute carrier family 6 (amino acid transporter), member 14              | -0.27 | CAGGTGATAACTTGCACTACTA | NM_007231:    | NM_007231:                        |
| 11254  | SLC6A14      | solute carrier family 6 (amino acid transporter), member 14              | 0.32  | CCGGAATGAGATCTCATTGAA  | NM_007231:    | NM_007231:                        |
| 55117  | SLC6A15      | solute carrier family 6, member 15                                       | -1.45 | CCCAATGGACGGTATGGAATA  | NM_182767:    | NM_182767:                        |
| 55117  | SLC6A15      | solute carrier family 6, member 15                                       | 0.92  | CCAGCAGATTTACTACTATA   | NM_182767:    | NM_182767:                        |
| 28968  | SLC6A16      | solute carrier family 6, member 16                                       | 0.35  | CACCAGCTAACACCCAGTAAA  | NM_014037:    | NM_014037:                        |
| 28968  | SLC6A16      | solute carrier family 6, member 16                                       | 0.76  | ATCGTCTGTTGCGTATTTGAA  | NM_014037:    | NM_014037:                        |
| 388662 | SLC6A17      | solute carrier family 6, member 17                                       | 0.89  | CTGGATTATGGAACCAAGAA   | XM_371280:    | XM_371280;NM_001010898:           |
| 388662 | SLC6A17      | solute carrier family 6, member 17                                       | -0.96 | GTGGTCGGAATGCTGAGAAA   | XM_371280:    | XM_371280;NM_001010898:           |
| 348932 | SLC6A18      | solute carrier family 6, member 18                                       | -4.66 | GTGGTGTGCTTTATGTTTAT   | NM_182632:    | NM_182632:                        |
| 348932 | SLC6A18      | solute carrier family 6, member 18                                       | 1.48  | CAGCCTCATCAACGACTTTGA  | NM_182632:    | NM_182632:                        |
| 340024 | SLC6A19      | solute carrier family 6 (neutral amino acid transporter), member 19      | 0.35  | CAGGTTCAATAAGGACATCGA  | NM_001003841: | NM_001003841:                     |
| 340024 | SLC6A19      | solute carrier family 6 (neutral amino acid transporter), member 19      | -1.74 | CTGGTGTATGTCACATCAT    | NM_001003841: | NM_001003841:                     |
| 6530   | SLC6A2       | solute carrier family 6 (neurotransmitter transporter, noradrenalin), me | -0.23 | GCCTATCACTCATCTATAA    | NM_001043:    | NM_001043:                        |
| 6530   | SLC6A2       | solute carrier family 6 (neurotransmitter transporter, noradrenalin), me | -0.03 | CCGCCGTTTCTGCATAACCAA  | NM_001043:    | NM_001043:                        |
| 54716  | SLC6A20      | solute carrier family 6 (proline IMINO transporter), member 20           | 0.38  | TGCAATATATGGAAGGTTTA   | NM_020208:    | NM_020208;NM_022405:              |
| 54716  | SLC6A20      | solute carrier family 6 (proline IMINO transporter), member 20           | -1.09 | CCCGTGGATGCAATCTTCTTA  | NM_020208:    | NM_020208;NM_022405:              |
| 6531   | SLC6A3       | solute carrier family 6 (neurotransmitter transporter, dopamine), memt   | -4.08 | CAGCATCGTGTGGTCCCTTAA  | NM_001044:    | NM_001044:                        |
| 6531   | SLC6A3       | solute carrier family 6 (neurotransmitter transporter, dopamine), memt   | -2.78 | TAGTTGAAATTCATGCCTCAA  | NM_001044:    | NM_001044:                        |
| 6532   | SLC6A4       | solute carrier family 6 (neurotransmitter transporter, serotonin), memb  | 1.81  | TCACCTTCAATGAATACGTTAA | NM_001045:    | NM_001045:                        |
| 6532   | SLC6A4       | solute carrier family 6 (neurotransmitter transporter, serotonin), memb  | -1.73 | CCGCTTGAATGCTGTGTAACA  | NM_001045:    | NM_001045:                        |
| 6533   | SLC6A6       | solute carrier family 6 (neurotransmitter transporter, taurine), member  | -0.60 | TCAGACCAAACTTAGACCAA   | NM_003043:    | NM_003043:                        |
| 6533   | SLC6A6       | solute carrier family 6 (neurotransmitter transporter, taurine), member  | -1.00 | CACCCATCTTAAAGTGGTATA  | NM_003043:    | NM_003043:                        |
| 6534   | SLC6A7       | solute carrier family 6 (neurotransmitter transporter, L-proline), memb  | -1.16 | CACGTTTCCACGAAACATCTA  | NM_014228:    | NM_014228:                        |
| 6534   | SLC6A7       | solute carrier family 6 (neurotransmitter transporter, L-proline), memb  | -0.44 | CCTGGTATATAGCATGCTCAA  | NM_014228:    | NM_014228:                        |
| 6535   | SLC6A8       | solute carrier family 6 (neurotransmitter transporter, creatine), membe  | -0.21 | AAGGTGAATGCCAGTCTAAA   | NM_005629:    | NM_005629:                        |
| 6535   | SLC6A8       | solute carrier family 6 (neurotransmitter transporter, creatine), membe  | 0.69  | GAGAGTATATAGATCTCTA    | NM_005629:    | NM_005629:                        |
| 6536   | SLC6A9       | solute carrier family 6 (neurotransmitter transporter, glycine), member  | -1.07 | CACCATGCTTCTCAACAA     | NM_006934:    | NM_006934;NM_001024845;NM_201649: |
| 6536   | SLC6A9       | solute carrier family 6 (neurotransmitter transporter, glycine), member  | -0.97 | AGCGCATGACTACTCACTAA   | NM_006934:    | NM_006934;NM_001024845;NM_201649: |
| 6541   | SLC7A1       | solute carrier family 7 (cationic amino acid transporter, y+ system), me | 0.80  | AGGGTTGGTTATTTATCAAA   | NM_003045:    | NM_003045:                        |
| 6541   | SLC7A1       | solute carrier family 7 (cationic amino acid transporter, y+ system), me | 0.01  | ACGCTTATGACTCCTAATGTA  | NM_003045:    | NM_003045:                        |
| 56301  | SLC7A10      | solute carrier family 7 (neutral amino acid transporter, y+ system) me   | -0.85 | CAGCTTCACTCAGAGCCTAT   | NM_019849:    | NM_019849:                        |
| 56301  | SLC7A10      | solute carrier family 7 (neutral amino acid transporter, y+ system) me   | -0.03 | CACGTTCCACCAAGATGCGCTA | NM_019849:    | NM_019849:                        |
| 23657  | SLC7A11      | solute carrier family 7 (cationic amino acid transporter, y+ system) me  | -0.71 | CACACCTTAATATCATTTCAA  | NM_014331:    | NM_014331:                        |
| 23657  | SLC7A11      | solute carrier family 7 (cationic amino acid transporter, y+ system) me  | -0.27 | AACCACCTGTTTCACTAATAA  | NM_014331:    | NM_014331:                        |
| 157724 | SLC7A13      | solute carrier family 7 (cationic amino acid transporter, y+ system) me  | 4.92  | AAGTTTAAACATATGATAGAA  | NM_138817:    | NM_138817:                        |
| 157724 | SLC7A13      | solute carrier family 7 (cationic amino acid transporter, y+ system) me  | 0.20  | CGGGTCAATATGCTGTATAT   | NM_138817:    | NM_138817:                        |
| 6542   | SLC7A2       | solute carrier family 7 (cationic amino acid transporter, y+ system), mc | -0.23 | CAGCATCTTGGTGAACATTTA  | NM_003046:    | NM_003046;NM_001008539:           |
| 6542   | SLC7A2       | solute carrier family 7 (cationic amino acid transporter, y+ system), mc | -1.86 | CAGGGTAACTCGAAGAGTGA   | NM_003046:    | NM_003046;NM_001008539:           |
| 84889  | SLC7A3       | solute carrier family 7 (cationic amino acid transporter, y+ system), me | -0.01 | TGGCATATCTCTACAGCTAT   | NM_032803:    | NM_032803:                        |
| 84889  | SLC7A3       | solute carrier family 7 (cationic amino acid transporter, y+ system), me | 1.10  | TAGCTGCTTACCAACTTTAAA  | NM_032803:    | NM_032803:                        |
| 6545   | SLC7A4       | solute carrier family 7 (cationic amino acid transporter, y+ system), me | 0.02  | CAGAGCCTTCTGTTTATGAT   | NM_004173:    | NM_004173:                        |
| 6545   | SLC7A4       | solute carrier family 7 (cationic amino acid transporter, y+ system), me | -0.74 | AGGGCTGAACCTCACACACTA  | NM_004173:    | NM_004173:                        |
| 8140   | SLC7A5       | solute carrier family 7 (cationic amino acid transporter, y+ system), me | -1.23 | ACGCACGACGCTGACGCTCTTA | NM_003486:    | NM_003486:                        |

|        |          |                                                                          |       |                        |            |                                          |
|--------|----------|--------------------------------------------------------------------------|-------|------------------------|------------|------------------------------------------|
| 8140   | SLC7A5   | solute carrier family 7 (cationic amino acid transporter, y+ system), me | 0.40  | AAGGGTGTGTGTCCTCAATCTA | NM_003486: | NM_003486:                               |
| 9057   | SLC7A6   | solute carrier family 7 (cationic amino acid transporter, y+ system), me | -1.09 | CAATAGGCTGATTTGATTTAA  | NM_003983: | NM_003983:                               |
| 9057   | SLC7A6   | solute carrier family 7 (cationic amino acid transporter, y+ system), me | -5.65 | CAGGATCTGGGCCAACCTCAA  | NM_003983: | NM_003983:                               |
| 9056   | SLC7A7   | solute carrier family 7 (cationic amino acid transporter, y+ system), me | -0.54 | CAGGTGCTGGATGACAATAAA  | NM_003982: | NM_003982:                               |
| 9056   | SLC7A7   | solute carrier family 7 (cationic amino acid transporter, y+ system), me | -2.45 | TAGAGAGACATGAAACTATCA  | NM_003982: | NM_003982:                               |
| 23428  | SLC7A8   | solute carrier family 7 (cationic amino acid transporter, y+ system), me | 0.97  | CCCGAATCTGCTGCTGTTAAA  | NM_012244: | NM_012244:NM_182728:                     |
| 23428  | SLC7A8   | solute carrier family 7 (cationic amino acid transporter, y+ system), me | -0.17 | CAGGCGTTGAGGAAACATATT  | NM_012244: | NM_012244:NM_182728:                     |
| 11136  | SLC7A9   | solute carrier family 7 (cationic amino acid transporter, y+ system), me | 0.80  | TGACATAAAGCTGTTAGTCAA  | NM_014270: | NM_014270:                               |
| 11136  | SLC7A9   | solute carrier family 7 (cationic amino acid transporter, y+ system), me | 0.36  | TGGTATCATAGCAACGATTTA  | NM_014270: | NM_014270:                               |
| 6548   | SLC9A1   | solute carrier family 9 (sodium/hydrogen exchanger), member 1 (anti      | 0.06  | CAGACCAATCTTGTATTTCTAA | NM_003047: | NM_003047:                               |
| 6548   | SLC9A1   | solute carrier family 9 (sodium/hydrogen exchanger), member 1 (anti      | 1.00  | CCGGTTTAAAGAAATATGT    | NM_003047: | NM_003047:                               |
| 6549   | SLC9A2   | solute carrier family 9 (sodium/hydrogen exchanger), member 2            | -0.43 | CAGGTGATCTATGCTGATCTA  | NM_003048: | NM_003048:                               |
| 6549   | SLC9A2   | solute carrier family 9 (sodium/hydrogen exchanger), member 2            | 1.42  | ATGGGTAGCAATCGTATTATT  | NM_003048: | NM_003048:                               |
| 6550   | SLC9A3   | solute carrier family 9 (sodium/hydrogen exchanger), member 3            | -1.25 | CACCACCATCATCGTAGTGT   | NM_004174: | NM_004174:                               |
| 6550   | SLC9A3   | solute carrier family 9 (sodium/hydrogen exchanger), member 3            | 1.02  | TGGCAGAAATTCACCATCAA   | NM_004174: | NM_004174:                               |
| 9368   | SLC9A3R1 | solute carrier family 9 (sodium/hydrogen exchanger), member 3 regul      | -1.54 | AGCGAGGAGCTGAATTCACAA  | NM_004252: | NM_004252:                               |
| 9368   | SLC9A3R1 | solute carrier family 9 (sodium/hydrogen exchanger), member 3 regul      | -0.44 | CACCAGAAACGGCAGCAGCAA  | NM_004252: | NM_004252:                               |
| 9351   | SLC9A3R2 | solute carrier family 9 (sodium/hydrogen exchanger), member 3 regul      | 0.15  | CCGAGACAGATGAACACTTCA  | NM_004785: | NM_004785:                               |
| 9351   | SLC9A3R2 | solute carrier family 9 (sodium/hydrogen exchanger), member 3 regul      | 1.01  | CGCGCTAAATAATTGCAAT    | NM_004785: | NM_004785:                               |
| 389015 | SLC9A4   | solute carrier family 9 (sodium/hydrogen exchanger), member 4            | -2.97 | TACGGCTTATTTCAATTGA    | AL833048:  | NM_001011552:                            |
| 389015 | SLC9A4   | solute carrier family 9 (sodium/hydrogen exchanger), member 4            | -8.03 | ACAAGCGTGATTAATCAGTAA  | AL833048:  | NM_001011552:                            |
| 6553   | SLC9A5   | solute carrier family 9 (sodium/hydrogen exchanger), member 5            | -0.39 | CTGGGCTTAAGCTAAACCTT   | NM_004594: | NM_004594:                               |
| 6553   | SLC9A5   | solute carrier family 9 (sodium/hydrogen exchanger), member 5            | -1.41 | AAGCAAGAGCATCATTCTTAT  | NM_004594: | NM_004594:                               |
| 10479  | SLC9A6   | solute carrier family 9 (sodium/hydrogen exchanger), member 6            | 0.39  | AAGCTTACTAATCTCACTTA   | NM_006359: | NM_006359:                               |
| 10479  | SLC9A6   | solute carrier family 9 (sodium/hydrogen exchanger), member 6            | 0.76  | CCGGTAAATTTGTAGATAAT   | NM_006359: | NM_006359:                               |
| 84679  | SLC9A7   | solute carrier family 9 (sodium/hydrogen exchanger), member 7            | 0.12  | TCCGAGAGGACCAGAAATGAA  | NM_032591: | NM_032591:                               |
| 84679  | SLC9A7   | solute carrier family 9 (sodium/hydrogen exchanger), member 7            | 0.23  | CAACGTGACTAAGTTTACC    | NM_032591: | NM_032591:                               |
| 23315  | SLC9A8   | solute carrier family 9 (sodium/hydrogen exchanger), member 8            | 0.38  | TTGGTCCACTTGGTAAACAA   | NM_015266: | NM_015266:                               |
| 23315  | SLC9A8   | solute carrier family 9 (sodium/hydrogen exchanger), member 8            | -0.69 | CAGAGTCCGCTTAGTCCAGAA  | NM_015266: | NM_015266:                               |
| 285193 | SLC9A9   | solute carrier family 9 (sodium/hydrogen exchanger), member 9            | -0.43 | CCACTGTTGTTAGGCTTAA    | NM_173653: | NM_173653:                               |
| 285193 | SLC9A9   | solute carrier family 9 (sodium/hydrogen exchanger), member 9            | 0.11  | AAGGAATGCCAGCTATTTA    | NM_173653: | NM_173653:                               |
| 10599  | SLCO1B1  | solute carrier organic anion transporter family, member 1B1              | -1.04 | TAGCTACATATTTGGTGTAA   | NM_006446: | NM_006446:                               |
| 10599  | SLCO1B1  | solute carrier organic anion transporter family, member 1B1              | 2.35  | TGGGCTTGTCTCAATGTAA    | NM_006446: | NM_006446:                               |
| 28234  | SLCO1B3  | solute carrier organic anion transporter family, member 1B3              | -0.79 | TTCATCTATGTTGCAATCAA   | NM_019844: | NM_019844:                               |
| 28234  | SLCO1B3  | solute carrier organic anion transporter family, member 1B3              | -2.23 | TAGCTATGCCCTTATGGTTAA  | NM_019844: | NM_019844:                               |
| 6585   | SLIT1    | slit homolog 1 (Drosophila)                                              | -0.67 | CCGGATCTGAACCCATGCTAA  | NM_003061: | NM_003061:                               |
| 6585   | SLIT1    | slit homolog 1 (Drosophila)                                              | -0.30 | CACGGCAGAACTCGGATGAA   | NM_003061: | NM_003061:                               |
| 9353   | SLIT2    | slit homolog 2 (Drosophila)                                              | 0.09  | ACGAATGACCTGAGCAATAA   | NM_004787: | NM_004787:                               |
| 9353   | SLIT2    | slit homolog 2 (Drosophila)                                              | 0.38  | CACCGAGAGACTGATTTAAA   | NM_004787: | NM_004787:                               |
| 6586   | SLIT3    | slit homolog 3 (Drosophila)                                              | -1.60 | CACCCAGTACAAGAACTGAA   | NM_003062: | NM_003062:                               |
| 6586   | SLIT3    | slit homolog 3 (Drosophila)                                              | -0.33 | CCAGACTAGATTTGAGTGAAA  | NM_003062: | NM_003062:                               |
| 84189  | SLITRK6  | SLIT and NTRK-like family, member 6                                      | 0.21  | CTGGAACCTGACAAATATAAA  | NM_032229: | NM_032229:                               |
| 84189  | SLITRK6  | SLIT and NTRK-like family, member 6                                      | -0.03 | AGGGTCAAATATGAAATACAA  | NM_032229: | NM_032229:                               |
| 9748   | SLK      | STE20-like kinase (yeast)                                                | -0.41 | CCAGATCAGACCCGTGATAAA  | NM_014720: | NM_014720:                               |
| 9748   | SLK      | STE20-like kinase (yeast)                                                | -6.42 | TAGCATCTTGTGATCCACCA   | NM_014720: | NM_014720:                               |
| 57152  | SLURP1   | secreted LY6/PLAUR domain containing 1                                   | -1.03 | CAGGACCATTCACCCGTCGAA  | NM_020427: | NM_020427:                               |
| 57152  | SLURP1   | secreted LY6/PLAUR domain containing 1                                   | -7.20 | CAGGGCGGAAGGTGCTCCTCA  | NM_020427: | NM_020427:                               |
| 4086   | SMAD1    | SMAD, mothers against DPP homolog 1 (Drosophila)                         | -0.02 | CAGGACTTTGTTGACAGTTAA  | NM_005900: | NM_001003688:NM_005900:                  |
| 4086   | SMAD1    | SMAD, mothers against DPP homolog 1 (Drosophila)                         | 0.19  | CACACACACCTTGGTAACATA  | NM_005900: | NM_001003688:NM_005900:                  |
| 4087   | SMAD2    | SMAD, mothers against DPP homolog 2 (Drosophila)                         | -0.20 | CAGGTAATGTATCATGATCCA  | NM_005901: | NM_001003652:NM_005901:                  |
| 4087   | SMAD2    | SMAD, mothers against DPP homolog 2 (Drosophila)                         | -1.95 | CTAGAAATCACTCCCAATTA   | NM_005901: | NM_001003652:NM_005901:                  |
| 4088   | SMAD3    | SMAD, mothers against DPP homolog 3 (Drosophila)                         | -1.98 | AAGGAGCACCTTGACAGACTT  | NM_005902: | NM_005902:                               |
| 4088   | SMAD3    | SMAD, mothers against DPP homolog 3 (Drosophila)                         | -1.20 | ATCAAGGGATTTCTATGGAA   | NM_005902: | NM_005902:                               |
| 4089   | SMAD4    | SMAD, mothers against DPP homolog 4 (Drosophila)                         | -0.79 | AAGCAGCGTCACTTACCTTAA  | NM_005359: | NM_005359:                               |
| 4089   | SMAD4    | SMAD, mothers against DPP homolog 4 (Drosophila)                         | -0.77 | CCCTGTTAAACAGATGTTGA   | NM_005359: | NM_005359:                               |
| 4090   | SMAD5    | SMAD, mothers against DPP homolog 5 (Drosophila)                         | 0.02  | AACATCTGATGTACCAATTTA  | NM_005903: | NM_005903:NM_001001419:NM_001001420:     |
| 4090   | SMAD5    | SMAD, mothers against DPP homolog 5 (Drosophila)                         | 0.40  | CTGAGGTGAAATCCAGAGTAA  | NM_005903: | NM_005903:NM_001001419:NM_001001420:     |
| 4091   | SMAD6    | SMAD, mothers against DPP homolog 6 (Drosophila)                         | 0.23  | TACCAGTCACTCGATAATAAA  | NM_005585: | NM_005585:                               |
| 4091   | SMAD6    | SMAD, mothers against DPP homolog 6 (Drosophila)                         | -0.24 | AAGACGCACTTTGGCTTATAA  | NM_005585: | NM_005585:                               |
| 4092   | SMAD7    | SMAD, mothers against DPP homolog 7 (Drosophila)                         | -2.45 | AAGGAGTTTATGTTCCATTTA  | NM_005904: | NM_005904:                               |
| 4092   | SMAD7    | SMAD, mothers against DPP homolog 7 (Drosophila)                         | 0.21  | CAGGCAATCTCCGGAAGTCAA  | NM_005904: | NM_005904:                               |
| 6595   | SMARCA2  | SWI/SNF related, matrix associated, actin dependent regulator of chrc    | 0.50  | AGGCGTCTACATAAGGTGTTA  | NM_003070: | NM_139045:NM_003070:                     |
| 6595   | SMARCA2  | SWI/SNF related, matrix associated, actin dependent regulator of chrc    | 0.01  | CACCGCATAGCTCATAGGATA  | NM_003070: | NM_139045:NM_003070:                     |
| 6596   | SMARCA3  | SWI/SNF related, matrix associated, actin dependent regulator of chrc    | 0.82  | AACAATGTGAATGGAATACAA  | NM_003071: | NM_003071:NM_139048:                     |
| 6596   | SMARCA3  | SWI/SNF related, matrix associated, actin dependent regulator of chrc    | 0.96  | ACGGGAGTAAATTAATAAT    | NM_003071: | NM_003071:NM_139048:                     |
| 6597   | SMARCA4  | SWI/SNF related, matrix associated, actin dependent regulator of chrc    | -0.11 | CCCGTGGACTCAAGAAAGATA  | NM_003072: | NM_003072:                               |
| 6597   | SMARCA4  | SWI/SNF related, matrix associated, actin dependent regulator of chrc    | 0.62  | CCGCGTCAACAACAGATGAAA  | NM_003072: | NM_003072:                               |
| 56916  | SMARCAD1 | SWI/SNF-related, matrix-associated actin-dependent regulator of chro     | 0.48  | CAGCATAGTACCTCAGATTA   | NM_020159: | NM_020159:                               |
| 56916  | SMARCAD1 | SWI/SNF-related, matrix-associated actin-dependent regulator of chro     | 0.78  | AAGGGTATAGAGTGTGTTA    | NM_020159: | NM_020159:                               |
| 50485  | SMARCAL1 | SWI/SNF related, matrix associated, actin dependent regulator of chrc    | -0.62 | CAGCTTGGACCTTCTTAGCAA  | NM_014140: | NM_014140:                               |
| 50485  | SMARCAL1 | SWI/SNF related, matrix associated, actin dependent regulator of chrc    | 0.86  | TTGAGTTAGTGGTAGGTCAA   | NM_014140: | NM_014140:                               |
| 6604   | SMARCD3  | SWI/SNF related, matrix associated, actin dependent regulator of chrc    | -3.53 | CAGTCGACTCTTACTTAGCAA  | NM_003078: | NM_003078:NM_001003801:NM_001003802:     |
| 6604   | SMARCD3  | SWI/SNF related, matrix associated, actin dependent regulator of chrc    | -0.98 | CTCAAGGTGATGACAGATGTA  | NM_003078: | NM_003078:NM_001003801:NM_001003802:     |
| 8243   | SMC1L1   | SMC1 structural maintenance of chromosomes 1-like 1 (yeast)              | -1.10 | CACCATGCACCTTAAATCCA   | NM_006306: | NM_006306:                               |
| 8243   | SMC1L1   | SMC1 structural maintenance of chromosomes 1-like 1 (yeast)              | 0.60  | CGGCGTATGATGAAATCAAT   | NM_006306: | NM_006306:                               |
| 10592  | SMC2L1   | SMC2 structural maintenance of chromosomes 2-like 1 (yeast)              | -0.06 | CAGGTGTTTATGGTGGTAGA   | NM_006444: | NM_006444:                               |
| 10592  | SMC2L1   | SMC2 structural maintenance of chromosomes 2-like 1 (yeast)              | -0.19 | CTGAACGCTGATACACATATA  | NM_006444: | NM_006444:                               |
| 23347  | SMCHD1   | structural maintenance of chromosomes flexible hinge domain contain      | 0.18  | CCCGTCTGCTCAATGTTAAA   | XM_113962: | XM_113962:                               |
| 23347  | SMCHD1   | structural maintenance of chromosomes flexible hinge domain contain      | -0.01 | AGGACCAATTAATCTCAGTCTA | XM_113962: | XM_113962:                               |
| 8242   | SMCX     | Smcy homolog, X-linked (mouse)                                           | -0.32 | CCGAGAGAGGCTAGAGCCAAA  | NM_004187: | NM_004187:                               |
| 8242   | SMCX     | Smcy homolog, X-linked (mouse)                                           | -0.11 | CCAGAGAAGCTAGACCTGAA   | NM_004187: | NM_004187:                               |
| 8284   | SMCY     | Smcy homolog, Y-linked (mouse)                                           | 0.31  | CAGGTTAGAAACCTTGAGAAT  | NM_004653: | NM_004653:                               |
| 8284   | SMCY     | Smcy homolog, Y-linked (mouse)                                           | 1.00  | CCAGAGACGTTGGATCTCAA   | NM_004653: | NM_004653:                               |
| 23049  | SMG1     | PI-3-kinase-related kinase SMG-1                                         | -2.40 | ATCGATGTTGCCAGACTACTA  | NM_014006: | NM_015092:                               |
| 23049  | SMG1     | PI-3-kinase-related kinase SMG-1                                         | 0.40  | CACCATGGTATTACAGGTTCA  | NM_014006: | NM_015092:                               |
| 6608   | SMO      | smoothened homolog (Drosophila)                                          | -2.91 | CCGGGACTATGCTATGTCA    | NM_005631: | NM_005631:                               |
| 6608   | SMO      | smoothened homolog (Drosophila)                                          | 1.17  | CTGGGGAACCTGAATCGCTA   | NM_005631: | NM_005631:                               |
| 54498  | SMOX     | spermine oxidase                                                         | -0.74 | CGGCGACGATAAACCAAGTCAA | NM_019025: | NM_175842:NM_175840:NM_175839:NM_019025: |
| 54498  | SMOX     | spermine oxidase                                                         | -1.06 | ACCACAGATCTTTCTGGAA    | NM_019025: | NM_175842:NM_175840:NM_175839:NM_019025: |
| 6609   | SMPD1    | sphingomyelin phosphodiesterase 1, acid lysosomal (acid sphingomye       | 0.47  | CTGGTTAGCTGGATATGGGA   | NM_000543: | NM_001007593:NM_000543:                  |
| 6609   | SMPD1    | sphingomyelin phosphodiesterase 1, acid lysosomal (acid sphingomye       | 1.15  | TGGAATTAATCCGAAATGTA   | NM_000543: | NM_001007593:NM_000543:                  |
| 23583  | SMUG1    | single-strand-selective monofunctional uracil-DNA glycosylase 1          | -2.44 | AAGCATGGGACATGAAATTA   | NM_014311: | NM_014311:                               |
| 23583  | SMUG1    | single-strand-selective monofunctional uracil-DNA glycosylase 1          | -1.52 | CTCGAAGTCAATCTTGGCCAA  | NM_014311: | NM_014311:                               |
| 57154  | SMURF1   | SMAD specific E3 ubiquitin protein ligase 1                              | 0.36  | AACCTCGATGATGTAATCGA   | NM_020429: | NM_181349:NM_020429:                     |
| 57154  | SMURF1   | SMAD specific E3 ubiquitin protein ligase 1                              | -0.14 | AAGGATAACCTCGATGATGTA  | NM_020429: | NM_181349:NM_020429:                     |
| 64750  | SMURF2   | SMAD specific E3 ubiquitin protein ligase 2                              | -1.29 | CACCCATGAAAGCTATGAAA   | NM_022739: | NM_022739:                               |
| 64750  | SMURF2   | SMAD specific E3 ubiquitin protein ligase 2                              | 1.46  | CCGGATCTTCAACAGTTTA    | NM_022739: | NM_022739:                               |

|        |         |                                                                         |       |                         |            |                                                                                    |
|--------|---------|-------------------------------------------------------------------------|-------|-------------------------|------------|------------------------------------------------------------------------------------|
| 150572 | SMYD1   | SET and MYND domain containing 1                                        | -1.34 | CAACTGACTGTCATATTTAA    | NM_198274: | NM_198274:                                                                         |
| 150572 | SMYD1   | SET and MYND domain containing 1                                        | -3.16 | CGGGATGATCTGCAAGCCTA    | NM_198274: | NM_198274:                                                                         |
| 56950  | SMYD2   | SET and MYND domain containing 2                                        | -0.02 | GAGGTAGTCTGAATCTTGA     | NM_020197: | NM_020197:                                                                         |
| 56950  | SMYD2   | SET and MYND domain containing 2                                        | -2.46 | CGGAGGGCCAAAGCACTATA    | NM_020197: | NM_020197:                                                                         |
| 10322  | SMYD5   | SMYD family member 5                                                    | 0.54  | AACATTAAGGCTTCCAGAAA    | NM_006062: | NM_006062:                                                                         |
| 10322  | SMYD5   | SMYD family member 5                                                    | -2.16 | CTGGCCTTATGGAGTATGGAA   | NM_006062: | NM_006062:                                                                         |
| 6615   | SNAI1   | snail homolog 1 (Drosophila)                                            | 0.44  | AAGCAGTAAATTTATATTA     | NM_005985: | NM_005985:                                                                         |
| 6615   | SNAI1   | snail homolog 1 (Drosophila)                                            | 0.48  | CGAATGTCCCTGCTCCACAA    | NM_005985: | NM_005985:                                                                         |
| 6591   | SNAI2   | snail homolog 2 (Drosophila)                                            | -2.39 | CACACTGAGTGACGCAATCAA   | NM_003068: | NM_003068:                                                                         |
| 6591   | SNAI2   | snail homolog 2 (Drosophila)                                            | 0.28  | CGAAGCCAAATGACAATAAA    | NM_003068: | NM_003068:                                                                         |
| 8773   | SNAP23  | synaptosomal-associated protein, 23kDa                                  | 0.51  | CTGGCAAGGCTTATAAGACAA   | NM_003825: | NM_003825:                                                                         |
| 8773   | SNAP23  | synaptosomal-associated protein, 23kDa                                  | -1.49 | CAGGCGCTATTAACATCATACA  | NM_003825: | NM_130798:NM_003825:                                                               |
| 6616   | SNAP25  | synaptosomal-associated protein, 25kDa                                  | -0.34 | AAGGTTGTACATAGTGGTCAT   | NM_003081: | NM_003081:                                                                         |
| 6616   | SNAP25  | synaptosomal-associated protein, 25kDa                                  | -1.54 | AAGATTAAGTTATACCAGCAA   | NM_003081: | NM_130811:NM_003081:                                                               |
| 9342   | SNAP29  | synaptosomal-associated protein, 29kDa                                  | -0.38 | CAGAAGTACGACAGCAACCTA   | NM_004782: | NM_004782:                                                                         |
| 9342   | SNAP29  | synaptosomal-associated protein, 29kDa                                  | 1.90  | CAGACCTAAGCTAATTTATTA   | NM_004782: | NM_004782:                                                                         |
| 6622   | SNCA    | synuclein, alpha (non A4 component of amyloid precursor)                | 0.57  | CATGCTTATAAGCAACATGAA   | NM_000345: | NM_000345:NM_000345:                                                               |
| 6622   | SNCA    | synuclein, alpha (non A4 component of amyloid precursor)                | 1.33  | CCAGCTCATGACATTTCTCAA   | NM_000345: | NM_007308:NM_000345:                                                               |
| 27044  | SND1    | staphylococcal nuclease domain containing 1                             | -0.01 | ATCCACCGTGTTCAGATATA    | NM_014390: | NM_014390:                                                                         |
| 27044  | SND1    | staphylococcal nuclease domain containing 1                             | 0.03  | CAGGCTGAACCTGTGGGCTA    | NM_014390: | NM_014390:                                                                         |
| 25992  | SNED1   | sushi, nidogen and EGF-like domains 1                                   | 1.17  | CACCTAGGCTTCAGCCCTAAA   | XM_059482: | XM_059482:                                                                         |
| 25992  | SNED1   | sushi, nidogen and EGF-like domains 1                                   | 0.64  | CAGGTAGTAACACGATCTTA    | XM_059482: | XM_059482:                                                                         |
| 150094 | SNF1LK  | SNF1-like kinase                                                        | 0.10  | AGCGAAATAAGCAATACGTTA   | NM_173354: | NM_173354:                                                                         |
| 23235  | SNF1LK2 | SNF1-like kinase 2                                                      | 0.13  | CGAAGGATTTGGTCTCTAGA    | NM_015191: | NM_015191:                                                                         |
| 54861  | SNRK    | SNF related kinase                                                      | 0.26  | ACCACTGAATTTGGAACGGATA  | NM_017719: | NM_017719:                                                                         |
| 54861  | SNRK    | SNF related kinase                                                      | 0.63  | CACCACCTGAATTTGGAACGGAT | NM_017719: | NM_017719:                                                                         |
| 6625   | SNRP70  | small nuclear ribonucleoprotein 70kDa polypeptide (RNP antigen)         | -0.80 | AAGATTTGAGCGGCGACAGCAA  | NM_003089: | NM_003089:NM_01009820:                                                             |
| 6625   | SNRP70  | small nuclear ribonucleoprotein 70kDa polypeptide (RNP antigen)         | -3.36 | CCGAGAGAGGTTTGGAGGTGTA  | NM_003089: | NM_003089:NM_01009820:                                                             |
| 6627   | SNRPA1  | (sm:small nuclear ribonucleoprotein polypeptide A'                      | -6.61 | AGCCTGTTTTGGTTAGCAAAA   | NM_003090: | NM_003090:                                                                         |
| 6627   | SNRPA1  | (sm:small nuclear ribonucleoprotein polypeptide A'                      | -9.89 | CAGCATTGTTGAAATGCTTAA   | NM_003090: | NM_003090:                                                                         |
| 6632   | SNRPD1  | small nuclear ribonucleoprotein D1 polypeptide 16kDa                    | 1.15  | CAGAGCTGCTTATTTAGTATA   | NM_006938: | NM_006938:                                                                         |
| 6632   | SNRPD1  | small nuclear ribonucleoprotein D1 polypeptide 16kDa                    | 1.35  | TAGGCTAAACTTAAACAATATA  | NM_006938: | NM_006938:                                                                         |
| 6634   | SNRPD3  | small nuclear ribonucleoprotein D3 polypeptide 18kDa                    | 0.77  | AAGGACTTTGTTCAATTTGA    | NM_004175: | NM_004175:                                                                         |
| 6634   | SNRPD3  | small nuclear ribonucleoprotein D3 polypeptide 18kDa                    | -0.49 | ACCCATGTTAAAGAGCATGAA   | NM_004175: | NM_004175:                                                                         |
| 6637   | SNRPG   | small nuclear ribonucleoprotein polypeptide G                           | 1.03  | AAGAACTTTAATAATGCGAA    | NM_003096: | NM_003096:                                                                         |
| 6637   | SNRPG   | small nuclear ribonucleoprotein polypeptide G                           | 1.06  | CTGGTTGACATTTGATTTCAA   | NM_003096: | NM_003096:                                                                         |
| 22938  | SNW1    | SNW domain containing 1                                                 | 0.91  | CCGGATGAAGGAGCTATTTAAA  | NM_012245: | NM_012245:                                                                         |
| 22938  | SNW1    | SNW domain containing 1                                                 | -5.80 | CTGGATATGGGACGAAGAAA    | NM_012245: | NM_012245:                                                                         |
| 6642   | SNX1    | sorting nexin 1                                                         | 1.89  | CTGGGTGACTCAATATGAAA    | NM_003099: | NM_003099:NM_148955:NM_152826:                                                     |
| 6642   | SNX1    | sorting nexin 1                                                         | -0.36 | CGGGTGGTCAAGAACATCA     | NM_003099: | NM_003099:NM_148955:NM_152826:                                                     |
| 23161  | SNX13   | sorting nexin 13                                                        | 0.62  | ACGGGTGCCAATATAATTGAT   | NM_015132: | NM_015132:                                                                         |
| 23161  | SNX13   | sorting nexin 13                                                        | 0.50  | GAGCTTATGATCAGTAAATA    | NM_015132: | NM_015132:                                                                         |
| 9784   | SNX17   | sorting nexin 17                                                        | -0.12 | CTGGCCTCGATGCCAAATTA    | NM_014748: | NM_014748:                                                                         |
| 9784   | SNX17   | sorting nexin 17                                                        | 0.75  | CAGCGAGACTTCAACAGTTT    | NM_014748: | NM_014748:                                                                         |
| 8723   | SNX4    | (sorting sorting nexin 4                                                | 1.92  | CTCGTTATTTCTAATGATGTA   | NM_003794: | NM_003794:                                                                         |
| 8723   | SNX4    | (sorting sorting nexin 4                                                | -0.86 | CCCATCCTTTGTAGAGACAAA   | NM_003794: | NM_003794:                                                                         |
| 58533  | SNX6    | sorting nexin 6                                                         | 0.50  | CCGCGGACTTAAAGCAATAAAA  | NM_021249: | NM_152233:NM_021249:                                                               |
| 58533  | SNX6    | sorting nexin 6                                                         | -0.02 | TCGCCAGTAGTTATATTTACAA  | NM_021249: | NM_152233:NM_021249:                                                               |
| 51429  | SNX9    | sorting nexin 9                                                         | -0.15 | TACCCAGTGCAGATAATTTAA   | NM_016224: | NM_016224:                                                                         |
| 51429  | SNX9    | sorting nexin 9                                                         | -0.02 | CCCATCATTGTTGGAAGATTAT  | NM_016224: | NM_016224:                                                                         |
| 8651   | SOCS1   | suppressor of cytokine signaling 1                                      | -1.49 | CTGGTTGTTGAGCAGCTTAA    | NM_003745: | NM_003745:                                                                         |
| 8651   | SOCS1   | suppressor of cytokine signaling 1                                      | -0.48 | CCCGCCGTGCACCGCATTA     | NM_003745: | NM_003745:                                                                         |
| 8835   | SOCS2   | suppressor of cytokine signaling 2                                      | 1.22  | TAGGCATCTACCCCTTTGAAA   | NM_003877: | NM_003877:                                                                         |
| 8835   | SOCS2   | suppressor of cytokine signaling 2                                      | -0.06 | AAGAGGTAGCTAGGTTTAA     | NM_003877: | NM_003877:                                                                         |
| 9021   | SOCS3   | suppressor of cytokine signaling 3                                      | 0.25  | AAACATTTCAAGTATTTATA    | NM_003955: | NM_003955:                                                                         |
| 9021   | SOCS3   | suppressor of cytokine signaling 3                                      | 0.62  | TTGCACATTTTATATTTATA    | NM_003955: | NM_003955:                                                                         |
| 122809 | SOCS4   | suppressor of cytokine signaling 4                                      | -0.04 | TAGGTGATCTGTTAACTCGA    | NM_080867: | NM_199421:NM_080867:                                                               |
| 122809 | SOCS4   | suppressor of cytokine signaling 4                                      | 0.26  | CAGTAAGATATTGGACACAAA   | NM_080867: | NM_199421:NM_080867:                                                               |
| 9655   | SOCS5   | suppressor of cytokine signaling 5                                      | 0.62  | TCCAATGACATATTATAGTAA   | NM_014011: | NM_014011:NM_144949:                                                               |
| 9655   | SOCS5   | suppressor of cytokine signaling 5                                      | -1.34 | CAGAGTTAATGAACAGTCTAA   | NM_014011: | NM_014011:NM_144949:                                                               |
| 9306   | SOCS6   | suppressor of cytokine signaling 6                                      | -0.61 | CGGGTACAAAATGGCATAACA   | NM_004232: | NM_004232:                                                                         |
| 9306   | SOCS6   | suppressor of cytokine signaling 6                                      | 0.93  | TTGATCTAATTGAGCATTTCAA  | NM_004232: | NM_004232:                                                                         |
| 30837  | SOCS7   | suppressor of cytokine signaling 7                                      | -0.58 | ACCAAAATTAAGCTACCATGAA  | NM_014598: | NM_014598:                                                                         |
| 30837  | SOCS7   | suppressor of cytokine signaling 7                                      | 0.93  | CCGAAAGTTCTACTACTATGA   | NM_014598: | NM_014598:                                                                         |
| 6647   | SOD1    | superoxide dismutase 1, soluble (amyotrophic lateral sclerosis 1 (adult | -0.95 | ATGGCACTTATTATGAGGCTA   | NM_000454: | NM_000454:                                                                         |
| 6647   | SOD1    | superoxide dismutase 1, soluble (amyotrophic lateral sclerosis 1 (adult | 1.02  | CCAGTGAGGCTCCACTTTA     | NM_000454: | NM_000454:                                                                         |
| 6648   | SOD2    | superoxide dismutase 2, mitochondrial                                   | 1.50  | ATCGTTATGCTGATGTTA      | NM_000636: | NM_000636:                                                                         |
| 6648   | SOD2    | superoxide dismutase 2, mitochondrial                                   | 0.88  | CTAAATACAATTTGCTATTTA   | NM_000636: | NM_000636:                                                                         |
| 6649   | SOD3    | superoxide dismutase 3, extracellular                                   | 0.10  | AACCTTTGTTACAGATTTAA    | NM_003102: | NM_003102:                                                                         |
| 6649   | SOD3    | superoxide dismutase 3, extracellular                                   | 1.29  | CTCCTTCACTCTTTAATAAT    | NM_003102: | NM_003102:                                                                         |
| 6650   | SOLH    | small optic lobes homolog (Drosophila)                                  | -2.01 | CAGGAGGCTCCTGGTACTCT    | NM_005632: | NM_005632:                                                                         |
| 6650   | SOLH    | small optic lobes homolog (Drosophila)                                  | -2.01 | ACGGGTGCTCCTCGCCAGAA    | NM_005632: | NM_005632:                                                                         |
| 10580  | SORBS1  | sorbin and SH3 domain containing 1                                      | -1.66 | ACCCGGCAACACGAAAGCAAA   | NM_006434: | NM_006434:NM_015385:NM_001034954:NM_001034955:NM_001034956:NM_024991:NM_001034957: |
| 10580  | SORBS1  | sorbin and SH3 domain containing 1                                      | 1.17  | CAGGATTCAGTCCCTACTA     | NM_006434: | NM_006434:NM_024991:NM_001034957:                                                  |
| 114815 | SORCS1  | sortilin-related VPS10 domain containing receptor 1                     | -0.72 | CCGGCTGAACCTCATACATCA   | NM_052918: | NM_001013031:NM_052918:                                                            |
| 114815 | SORCS1  | sortilin-related VPS10 domain containing receptor 1                     | -0.12 | CAGGAAGGTGGTTCCAAATA    | NM_052918: | NM_001013031:NM_052918:                                                            |
| 57537  | SORCS2  | (sor sortilin-related VPS10 domain containing receptor 2                | -2.61 | CACCCGCTCCTGTTGAGTAA    | NM_020777: | NM_020777:                                                                         |
| 57537  | SORCS2  | (sor sortilin-related VPS10 domain containing receptor 2                | 1.91  | CCAGCTCATCGCAATTTCTA    | NM_020777: | NM_020777:                                                                         |
| 22986  | SORCS3  | sortilin-related VPS10 domain containing receptor 3                     | 0.56  | CACAACCTCCTTAAAGTCAA    | NM_014978: | NM_014978:                                                                         |
| 22986  | SORCS3  | sortilin-related VPS10 domain containing receptor 3                     | -3.77 | AAGGCACTCAGTGGATCTTAA   | NM_014978: | NM_014978:                                                                         |
| 6652   | SORD    | sorbitol dehydrogenase                                                  | -0.10 | CTGGTAAGATTTAGACCTAAA   | NM_003104: | NM_003104:                                                                         |
| 6652   | SORD    | sorbitol dehydrogenase                                                  | -1.19 | CACCTCCAGTTTAGAACGCAA   | NM_003104: | NM_003104:                                                                         |
| 6653   | SORL1   | sortilin-related receptor, L(DLR class) A repeats-containing            | -0.88 | TACGGACAGGTTAGTCTGAA    | NM_003105: | NM_003105:                                                                         |
| 6653   | SORL1   | sortilin-related receptor, L(DLR class) A repeats-containing            | 0.94  | CTGGGATTTACGGAGCAATA    | NM_003105: | NM_003105:                                                                         |
| 6272   | SORT1   | sortilin 1                                                              | 1.46  | CAGCAGAGAATTGACTAGATA   | NM_002959: | NM_002959:                                                                         |
| 6272   | SORT1   | sortilin 1                                                              | -0.74 | CCCACGTCAGTTACACATTTAA  | NM_002959: | NM_002959:                                                                         |
| 6654   | SOS1    | son of sevenless homolog 1 (Drosophila)                                 | 0.49  | ACGAGTAGAATACAGATCAAA   | NM_005633: | NM_005633:                                                                         |
| 6654   | SOS1    | son of sevenless homolog 1 (Drosophila)                                 | 1.13  | TGGGTTGAATCCATCACTAAA   | NM_005633: | NM_005633:                                                                         |
| 50964  | SOST    | sclerosteosis                                                           | -1.63 | ATGAATCATGACCGAAAGAAA   | NM_025237: | NM_025237:                                                                         |
| 50964  | SOST    | sclerosteosis                                                           | -0.04 | GACAATGTTAATTTGCTTTA    | NM_025237: | NM_025237:                                                                         |
| 6659   | SOX4    | SRY (sex determining region Y)-box 4                                    | -4.27 | AAGGACACGACGAGAGTTTAA   | NM_003107: | NM_003107:                                                                         |
| 6659   | SOX4    | SRY (sex determining region Y)-box 4                                    | -0.51 | CACGGTCAAAGTAAATGGAT    | NM_003107: | NM_003107:                                                                         |
| 6662   | SOX9    | SRY (sex determining region Y)-box 9 (campomelic dysplasia, autosor     | -5.47 | CAGCCACTGACAGACCTTAA    | NM_000346: | NM_000346:                                                                         |
| 6662   | SOX9    | SRY (sex determining region Y)-box 9 (campomelic dysplasia, autosor     | 0.24  | ATGGAGTAAACAATAGTCTA    | NM_000346: | NM_000346:                                                                         |
| 6667   | SP1     | (Sp1 trar Sp1 transcription factor                                      | -1.72 | CAGCAAGTTCTGACAGGACTA   | NM_138473: | NM_138473:                                                                         |
| 6667   | SP1     | (Sp1 trar Sp1 transcription factor                                      | -0.11 | CTAGGACGCAATAAATTTATA   | NM_138473: | NM_138473:                                                                         |
| 3431   | SP110   | SP110 nuclear body protein                                              | -0.02 | CCCAGACACTCATAGATTTAA   | NM_004509: | NM_080424:NM_004509:                                                               |



|        |         |                                                                              |       |                        |            |                                   |
|--------|---------|------------------------------------------------------------------------------|-------|------------------------|------------|-----------------------------------|
| 3431   | SP110   | SP110 nuclear body protein                                                   | 0.02  | AAGGAAAGGCTGATTACGGAA  | NM_004509: | NM_080424:NM_004509:              |
| 11262  | SP140   | SP140 nuclear body protein                                                   | 1.03  | CAGTGCTAGTGAACATAGAAA  | NM_007237: | NM_007237:                        |
| 11262  | SP140   | SP140 nuclear body protein                                                   | -3.37 | AACAGCAATGCCTGTCATGAA  | NM_007237: | NM_007237:                        |
| 6670   | SP3     | Sp3 transcription factor                                                     | 0.47  | CGGGTTTCTCCTGATATTAA   | NM_003111: | NM_001017371:NM_003111:           |
| 6670   | SP3     | Sp3 transcription factor                                                     | -2.23 | CTGCCGGAGATGATACCTTGA  | NM_003111: | NM_001017371:NM_003111:           |
| 10615  | SPAG5   | sperm associated antigen 5                                                   | 0.27  | CCAAATTAGCTCTACTCCTAA  | NM_006461: | NM_006461:                        |
| 10615  | SPAG5   | sperm associated antigen 5                                                   | -0.11 | TCCCGACAACCTCACAGAGAAA | NM_006461: | NM_006461:                        |
| 6677   | SPAM1   | sperm adhesion molecule 1 (PH-20 hyaluronidase, zona pellucida bin           | -1.36 | CTGGGTGCTTCTGGAATTGTA  | NM_003117: | NM_003117:NM_153189:              |
| 6677   | SPAM1   | sperm adhesion molecule 1 (PH-20 hyaluronidase, zona pellucida bin           | 0.39  | ACCGGGCAAGGTGTACAATA   | NM_003117: | NM_003117:NM_153189:              |
| 6678   | SPARC   | secreted protein, acidic, cysteine-rich (osteonectin)                        | 0.07  | ACCCAAGCATGACATCTTTA   | NM_003118: | NM_003118:                        |
| 6678   | SPARC   | secreted protein, acidic, cysteine-rich (osteonectin)                        | 1.30  | CAAGGTGCTAACATAGATTTA  | NM_003118: | NM_003118:                        |
| 8404   | SPARCL1 | SPARC-like 1 (mast9, hevjin)                                                 | -0.51 | ACCCTAATAAAGATGCCATAA  | NM_004684: | NM_004684:                        |
| 8404   | SPARCL1 | SPARC-like 1 (mast9, hevjin)                                                 | -0.90 | CTGCATTGACTTATGAGATAA  | NM_004684: | NM_004684:                        |
| 6683   | SPAST   | spastin                                                                      | 0.81  | TCAGGTTAATACATCTTAAA   | NM_014946: | NM_014946:NM_199436:              |
| 6683   | SPAST   | spastin                                                                      | 0.22  | AACGTTATTGATCTGGATA    | NM_014946: | NM_014946:NM_199436:              |
| 64847  | SPATA20 | spermatogenesis associated 20                                                | -0.56 | CTCACCTAGAATAAAGCTTAA  | NM_022827: | NM_022827:                        |
| 64847  | SPATA20 | spermatogenesis associated 20                                                | -5.89 | CGCCTGATGCGGACCTGCTA   | NM_022827: | NM_022827:                        |
| 147841 | SPBC24  | spindle pole body component 24 homolog (S. cerevisiae)                       | 0.36  | CCCAGCTGCCCTTATAGTTAA  | NM_182513: | NM_182513:                        |
| 147841 | SPBC24  | spindle pole body component 24 homolog (S. cerevisiae)                       | 0.07  | CTCAACTTACCACCAAGTTA   | NM_182513: | NM_182513:                        |
| 57405  | SPBC25  | spindle pole body component 25 homolog (S. cerevisiae)                       | 0.01  | CCAGGGTTTAAATTAACATA   | NM_020675: | NM_020675:                        |
| 57405  | SPBC25  | spindle pole body component 25 homolog (S. cerevisiae)                       | 0.68  | CTCGTCATTTCATTAGGTATA  | NM_020675: | NM_020675:                        |
| 23013  | SPEN    | spen homolog, transcriptional regulator (Drosophila)                         | -0.35 | TACGATCAGGATTAATAGATA  | NM_015001: | NM_015001:                        |
| 23013  | SPEN    | spen homolog, transcriptional regulator (Drosophila)                         | -4.29 | CCCGTGGATGTGTTCAACTT   | NM_015001: | NM_015001:                        |
| 51062  | SPG3A   | spastic paraplegia 3A (autosomal dominant)                                   | 1.22  | ACAGCAGAAGCTAACAAATTTA | NM_015915: | NM_015915:NM_181598:              |
| 51062  | SPG3A   | spastic paraplegia 3A (autosomal dominant)                                   | 0.89  | CCGGAGAGCTAGATATTTAA   | NM_015915: | NM_015915:NM_181598:              |
| 8877   | SPHK1   | sphingosine kinase 1                                                         | 2.02  | CACGAACCAATCCAAATAAA   | NM_021972: | NM_021972:NM_182965:              |
| 8877   | SPHK1   | sphingosine kinase 1                                                         | -3.69 | CGGCTGCTGTCCACCATGAA   | NM_021972: | NM_021972:NM_182965:              |
| 56848  | SPHK2   | sphir sphingosine kinase 2                                                   | -2.52 | CAGGATTGCGCTCGCTTTCAT  | NM_020126: | NM_020126:                        |
| 56848  | SPHK2   | sphir sphingosine kinase 2                                                   | -0.25 | CGAGGGTATGGCCTGATCAA   | NM_020126: | NM_020126:                        |
| 6690   | SPINK1  | serine peptidase inhibitor, Kazal type 1                                     | 0.03  | CTGGCCTTATTGTGAATAAA   | NM_003122: | NM_003122:                        |
| 6690   | SPINK1  | serine peptidase inhibitor, Kazal type 1                                     | -0.80 | CTGGCCTTGTGAGAACCAA    | NM_003122: | NM_003122:                        |
| 6692   | SPINT1  | serine peptidase inhibitor, Kunlitz type 1                                   | -1.77 | CTGGCCAGGCATAGACTTTGAA | NM_003710: | NM_181642:NM_001032367:NM_003710: |
| 6692   | SPINT1  | serine peptidase inhibitor, Kunlitz type 1                                   | -1.83 | CGGGAAGAGAGTGCACTTCTA  | NM_003710: | NM_181642:NM_001032367:NM_003710: |
| 23626  | SPO11   | SPO11 meiotic protein covalently bound to DSB-like (S. cerevisiae)           | 0.02  | CAGAGTGACTACTCAACAAA   | NM_012444: | NM_198265:NM_012444:              |
| 23626  | SPO11   | SPO11 meiotic protein covalently bound to DSB-like (S. cerevisiae)           | 0.16  | TACATATATTATCTACTGCAA  | NM_012444: | NM_198265:NM_012444:              |
| 6696   | SPP1    | secreted phosphoprotein 1 (osteopontin, bone sialoprotein 1, early T-ly      | 1.71  | ACGGTTTCCAGCAATTAATA   | NM_000582: | NM_000582:                        |
| 6696   | SPP1    | secreted phosphoprotein 1 (osteopontin, bone sialoprotein 1, early T-ly      | -0.11 | CAGCGTATCTTGGAAGTTCT   | NM_000582: | NM_000582:                        |
| 6697   | SPR     | sepiapt sepiapterin reductase (7,8-dihydrobiopterin:NADP+ oxidoreductase)    | 1.11  | AAGGAAAGGCTGCTCGTGATA  | NM_003124: | NM_003124:                        |
| 6697   | SPR     | sepiapt sepiapterin reductase (7,8-dihydrobiopterin:NADP+ oxidoreductase)    | -0.14 | AAGCTGCGAGCTTACTGGA    | NM_003124: | NM_003124:                        |
| 10252  | SPRY1   | sprouty homolog 1, antagonist of FGF signaling (Drosophila)                  | 1.18  | ACGAAGAAAGTACATATGTTA  | NM_005841: | NM_005841:NM_199327:              |
| 10252  | SPRY1   | sprouty homolog 1, antagonist of FGF signaling (Drosophila)                  | -0.07 | TAGATTCCGCTTACAATGTA   | NM_005841: | NM_005841:NM_199327:              |
| 10253  | SPRY2   | sprouty homolog 2 (Drosophila)                                               | 0.20  | CCCATGTATTGCATAAGCTAA  | NM_005842: | NM_005842:                        |
| 10253  | SPRY2   | sprouty homolog 2 (Drosophila)                                               | -0.88 | CAGAGCCATCCGAACACCAA   | NM_005842: | NM_005842:                        |
| 84926  | SPRYD3  | SPRY domain containing 3                                                     | 1.19  | CCGGTTTGTCTCATGAACAA   | NM_032840: | NM_032840:                        |
| 84926  | SPRYD3  | SPRY domain containing 3                                                     | -0.02 | CCAGTTGGGTCAAAAGTGCAA  | NM_032840: | NM_032840:                        |
| 283377 | SPRYD4  | (SPI)SPRY domain containing 4                                                | 0.29  | TACCAGATGGCTGAAGAGTAA  | NM_207344: | NM_207344:                        |
| 283377 | SPRYD4  | (SPI)SPRY domain containing 4                                                | 0.10  | AAAGCTAGGCATACAGCCAAA  | NM_207344: | NM_207344:                        |
| 80176  | SPSB1   | spl/ryanodine receptor domain and SOCS box containing 1                      | -0.53 | ATGTTGATAAATAGTCAGTAA  | NM_025106: | NM_025106:                        |
| 80176  | SPSB1   | spl/ryanodine receptor domain and SOCS box containing 1                      | 0.45  | CAGGTACAATAGATGACTTTA  | NM_025106: | NM_025106:                        |
| 84727  | SPSB2   | spl/ryanodine receptor domain and SOCS box containing 2                      | 3.09  | ATAGTAAGAGATGTTGTATA   | NM_032641: | NM_032641:                        |
| 84727  | SPSB2   | spl/ryanodine receptor domain and SOCS box containing 2                      | 0.73  | CAAGGCTATGACAGCTGTGTA  | NM_032641: | NM_032641:                        |
| 90864  | SPSB3   | spl/ryanodine receptor domain and SOCS box containing 3                      | 0.25  | AAATGTAGAGTTGATGCTCAA  | NM_080861: | NM_080861:                        |
| 90864  | SPSB3   | spl/ryanodine receptor domain and SOCS box containing 3                      | -0.62 | CAAGTAGACCTCTCCCGCTA   | NM_080861: | NM_080861:                        |
| 92369  | SPSB4   | spl/ryanodine receptor domain and SOCS box containing 4                      | -0.01 | ATGAAGAGGCTTCTAATAAA   | NM_080862: | NM_080862:                        |
| 92369  | SPSB4   | spl/ryanodine receptor domain and SOCS box containing 4                      | -1.12 | AAGCTTATTGAGCAATTA     | NM_080862: | NM_080862:                        |
| 6709   | SPTAN1  | spectrin, alpha, non-erythrocytic 1 (alpha-fodrin)                           | 0.04  | CACGGTGGATCCGAACAGAGA  | NM_003127: | NM_003127:                        |
| 6709   | SPTAN1  | spectrin, alpha, non-erythrocytic 1 (alpha-fodrin)                           | -1.48 | CGGGCTCGTACGTGAAGAAA   | NM_003127: | NM_003127:                        |
| 6710   | SPTB    | spectrin, beta, erythrocytic (includes spherocytosis, clinical type 1)       | -1.26 | CAGGATGCTCCTATGATGAA   | NM_000347: | NM_001024858:NM_000347:           |
| 6710   | SPTB    | spectrin, beta, erythrocytic (includes spherocytosis, clinical type 1)       | 1.94  | CACCTCTGGATCAACGACAAA  | NM_000347: | NM_001024858:NM_000347:           |
| 10558  | SPTLC1  | serine palmitoyltransferase, long chain base subunit 1                       | 1.16  | TCCTAAGTAGCAATAATTTA   | NM_006415: | NM_006415:                        |
| 10558  | SPTLC1  | serine palmitoyltransferase, long chain base subunit 1                       | -1.15 | CGGGTTTCAATGATGAGTAA   | NM_006415: | NM_006415:                        |
| 6713   | SQLE    | (squalene) squalene epoxidase                                                | 2.41  | ATGCTTAAATTTGCAATTTAA  | NM_003129: | NM_003129:                        |
| 6713   | SQLE    | (squalene) squalene epoxidase                                                | 2.38  | TAGTACCATACCACCTATAAA  | NM_003129: | NM_003129:                        |
| 58472  | SQRDL   | sulfide quinone reductase-like (yeast)                                       | -0.10 | AAAGAGTTCCTGATGGGTTA   | NM_021199: | NM_021199:                        |
| 58472  | SQRDL   | sulfide quinone reductase-like (yeast)                                       | -0.10 | CACGAAGGACTTGGAAACCTAT | NM_021199: | NM_021199:                        |
| 8878   | SQSTM1  | sequestosome 1                                                               | -0.23 | AACAATCTAATAAATGGCAT   | NM_003900: | NM_003900:                        |
| 8878   | SQSTM1  | sequestosome 1                                                               | -2.14 | TAGGGTCAAGAACCCATTTA   | NM_003900: | NM_003900:                        |
| 6714   | SRC     | v-src sarcoma (Schmidt-Ruppin A-2) viral oncogene homolog (avian)            | 0.23  | AAGCAGTGCCTGCTTATGAAA  | NM_005417: | NM_005417:NM_198291:              |
| 6714   | SRC     | v-src sarcoma (Schmidt-Ruppin A-2) viral oncogene homolog (avian)            | 0.30  | CGGCTTGGGCTGATGTTTGA   | NM_005417: | NM_005417:NM_198291:              |
| 136853 | SRCRB4D | scavenger receptor cysteine rich domain containing, group B (4 doma          | -1.26 | CAAGGAAGATGTTAACCGATA  | NM_080744: | NM_080744:                        |
| 136853 | SRCRB4D | scavenger receptor cysteine rich domain containing, group B (4 doma          | 0.04  | AAGATCCTTCTCCTCCTCAA   | NM_080744: | NM_080744:                        |
| 6715   | SRD5A1  | (ster) steroid-5-alpha-reductase, alpha polypeptide 1 (3-oxo-5 alpha-steroid | 0.03  | GAGGCTTATTGAAATACGTAA  | NM_001047: | NM_001047:                        |
| 6715   | SRD5A1  | (ster) steroid-5-alpha-reductase, alpha polypeptide 1 (3-oxo-5 alpha-steroid | -4.76 | CTCCGAAATTTGAAAGAGTAT  | NM_001047: | NM_001047:                        |
| 6715   | SRD5A1  | (ster) steroid-5-alpha-reductase, alpha polypeptide 1 (3-oxo-5 alpha-steroid | 1.59  | GAGGCTTATTGAAATACGTAA  | NM_001047: | NM_001047:                        |
| 6715   | SRD5A1  | (ster) steroid-5-alpha-reductase, alpha polypeptide 1 (3-oxo-5 alpha-steroid | -3.32 | CTCCGAAATTTGAAAGAGTAT  | NM_001047: | NM_001047:                        |
| 6716   | SRD5A2  | steroid-5-alpha-reductase, alpha polypeptide 2 (3-oxo-5 alpha-steroid        | 0.00  | CACCAGATGCTCACACAATA   | NM_000348: | NM_000348:                        |
| 6716   | SRD5A2  | steroid-5-alpha-reductase, alpha polypeptide 2 (3-oxo-5 alpha-steroid        | -0.03 | ATCCAAATAATGAGTAGTGA   | NM_000348: | NM_000348:                        |
| 6716   | SRD5A2  | steroid-5-alpha-reductase, alpha polypeptide 2 (3-oxo-5 alpha-steroid        | 0.09  | CACCAGATGCTCACACAATA   | NM_000348: | NM_000348:                        |
| 6716   | SRD5A2  | steroid-5-alpha-reductase, alpha polypeptide 2 (3-oxo-5 alpha-steroid        | 0.49  | ATCCAAATAATGAGTAGTGA   | NM_000348: | NM_000348:                        |
| 6720   | SREBF1  | sterol regulatory element binding transcription factor 1                     | -1.62 | ACCCTACTGATGAAGATGTA   | NM_004176: | NM_001005291:NM_004176:           |
| 6720   | SREBF1  | sterol regulatory element binding transcription factor 1                     | -1.04 | TGGGAGAAGCTGCCTATCAA   | NM_004176: | NM_001005291:NM_004176:           |
| 6721   | SREBF2  | sterol regulatory element binding transcription factor 2                     | -0.32 | CGGCAGTGTCTGCTATCGA    | NM_004599: | NM_004599:                        |
| 6721   | SREBF2  | sterol regulatory element binding transcription factor 2                     | 0.73  | CTGCAATTTGTGAGTAATCAA  | NM_004599: | NM_004599:                        |
| 6722   | SRF     | (serum) serum response factor (c-fos serum response element-binding transc   | -2.15 | CAAGTAGGAGTTCATCGACAAA | NM_003131: | NM_003131:                        |
| 6722   | SRF     | (serum) serum response factor (c-fos serum response element-binding transc   | -3.55 | CTGGATTGTTTCCAGGAGAAA  | NM_003131: | NM_003131:                        |
| 6717   | SRI     | sorcin                                                                       | 0.98  | AGGATTCACCTAGAAATTTA   | NM_003130: | NM_198901:NM_003130:              |
| 6717   | SRI     | sorcin                                                                       | -3.98 | CAGGCTGTGAATCAATTGCA   | NM_003130: | NM_198901:NM_003130:              |
| 6725   | SRMS    | src-related kinase lacking C-terminal regulatory tyrosine and N-termin       | 0.30  | CAGACCAACCTGGTACTTTA   | NM_080823: | NM_080823:                        |
| 6725   | SRMS    | src-related kinase lacking C-terminal regulatory tyrosine and N-termin       | -0.78 | CGGGTCTCCATGGCAGCTGA   | NM_080823: | NM_080823:                        |
| 6726   | SRP9    | signal recognition particle 9kDa                                             | 0.21  | CACGTTGGTCTCAAAATATA   | NM_003133: | NM_003133:                        |
| 6726   | SRP9    | signal recognition particle 9kDa                                             | 0.51  | TAGAAGCACGATATTTGATA   | NM_003133: | NM_003133:                        |
| 6732   | SRPK1   | SFRS protein kinase 1                                                        | 0.06  | CAGACTTGTACACCTATAA    | NM_003137: | NM_003137:                        |
| 6732   | SRPK1   | SFRS protein kinase 1                                                        | 0.60  | TACCATGTGATCCGAAAGTTA  | NM_003137: | NM_003137:                        |
| 6733   | SRPK2   | SFRS protein kinase 2                                                        | 0.16  | AACGGTACTCTACTTCTTA    | NM_182692: | NM_182691:NM_182692:              |
| 6733   | SRPK2   | SFRS protein kinase 2                                                        | 0.51  | CGGTTATCATGTTTATAGAAA  | NM_182692: | NM_182691:NM_182692:              |
| 6734   | SRPR    | signal recognition particle receptor ('docking protein')                     | 0.88  | CACGGTGACTCCACAGTAAA   | NM_003139: | NM_003139:                        |
| 6734   | SRPR    | signal recognition particle receptor ('docking protein')                     | 1.26  | CAGAGAAATAAGTAATTTATA  | NM_003139: | NM_003139:                        |
| 58477  | SRPRB   | signal recognition particle receptor, B subunit                              | -1.00 | CCAGATAAATGAACTGGAAA   | NM_021203: | NM_021203:                        |
| 58477  | SRPRB   | signal recognition particle receptor, B subunit                              | -0.87 | CAAGATGGTGTGAAACATTT   | NM_021203: | NM_021203:                        |

|        |                                                                  |                                                                             |            |                         |            |                                |
|--------|------------------------------------------------------------------|-----------------------------------------------------------------------------|------------|-------------------------|------------|--------------------------------|
| 27286  | SRPX2                                                            | sushi-repeat-containing protein, X-linked 2                                 | -0.12      | GAAGATTAACGCTCAACGTCAA  | NM_014467: | NM_014467:                     |
| 27286  | SRPX2                                                            | sushi-repeat-containing protein, X-linked 2                                 | -1.68      | CCCGATTGGTGTATACATTAA   | NM_014467: | NM_014467:                     |
| 6760   | SS18                                                             | synovial sarcoma translocation, chromosome 18                               | 0.93       | CCGAGGTGCATTCTAGATGAA   | NM_005637: | NM_005637;NM_001007559:        |
| 6760   | SS18                                                             | synovial sarcoma translocation, chromosome 18                               | -2.48      | ATCAGGGAACCTTAGTAAGTAA  | NM_005637: | NM_005637;NM_001007559:        |
| 6742   | SSBP1                                                            | single-stranded DNA binding protein 1                                       | 0.52       | AGCCTAAGATTAGACTGTAA    | NM_003143: | NM_003143:                     |
| 6742   | SSBP1                                                            | single-stranded DNA binding protein 1                                       | 0.23       | TCGGTTAGATCGTCAGGAAA    | NM_003143: | NM_003143:                     |
| 54434  | SSH1                                                             | slingshot homolog 1 (Drosophila)                                            | 0.44       | CTCGGAGAACCTAAACAACAA   | NM_018984: | NM_018984:                     |
| 54434  | SSH1                                                             | slingshot homolog 1 (Drosophila)                                            | 0.67       | AAAGAGATTTCGTAATGAATTA  | NM_018984: | NM_018984:                     |
| 85464  | SSH2                                                             | slingshot homolog 2 (Drosophila)                                            | 0.06       | CAGATTAGTCTAGCATGAAA    | NM_033389: | NM_033389:                     |
| 85464  | SSH2                                                             | slingshot homolog 2 (Drosophila)                                            | 1.32       | TTGAGGATGAATTAACCTTAA   | NM_033389: | NM_033389:                     |
| 54961  | SSH3                                                             | slingshot homolog 3 (Drosophila)                                            | -2.40      | CAGGCCAGAGATAGTCTTCTT   | NM_017857: | NM_018276;NM_017857:           |
| 54961  | SSH3                                                             | slingshot homolog 3 (Drosophila)                                            | -2.47      | TCCACGAGTCTTCACATGAA    | NM_017857: | NM_018276;NM_017857:           |
| 8082   | SSPN                                                             | sarcospan (Kras oncogene-associated gene)                                   | -1.19      | AAGCGTTAAGTCGGTAAGCTA   | NM_005086: | NM_005086:                     |
| 8082   | SSPN                                                             | sarcospan (Kras oncogene-associated gene)                                   | 0.18       | ATACACCTTAACTAATCATGAA  | NM_005086: | NM_005086:                     |
| 6745   | SSR1                                                             | signal sequence receptor, alpha (translocon-associated protein alpha)       | -9.79      | AAAGATTGAACGGCAATGTA    | NM_003144: | NM_003144:                     |
| 6745   | SSR1                                                             | signal sequence receptor, alpha (translocon-associated protein alpha)       | 0.23       | CAGATAGAAGTATTTGTATAA   | NM_003144: | NM_003144:                     |
| 6746   | SSR2                                                             | signal sequence receptor, beta (translocon-associated protein beta)         | -0.45      | CAAAGGATCTTAAATGCAA     | NM_003145: | NM_003145:                     |
| 6746   | SSR2                                                             | signal sequence receptor, beta (translocon-associated protein beta)         | 1.76       | CACCTCGGCAACAATTACTTA   | NM_003145: | NM_003145:                     |
| 6747   | SSR3                                                             | signal sequence receptor, gamma (translocon-associated protein gamma)       | 0.52       | TACAGTTAGGTAACACTTTA    | NM_007107: | NM_007107:                     |
| 6747   | SSR3                                                             | signal sequence receptor, gamma (translocon-associated protein gamma)       | 1.09       | CGAGCTGTTATTTATTTATTA   | NM_007107: | NM_007107:                     |
| 6748   | SSR4                                                             | signal sequence receptor, delta (translocon-associated protein delta)       | -0.61      | CAGGAAGGCTCAGAGGAATAA   | NM_006280: | NM_006280:                     |
| 6748   | SSR4                                                             | signal sequence receptor, delta (translocon-associated protein delta)       | -2.13      | ATGCAAGAACAGGTCAGAAA    | NM_006280: | NM_006280:                     |
| 6750   | SST                                                              | somatostatin                                                                | -3.38      | ACGGAGAAATGATGCCCTGGAA  | NM_001048: | NM_001048:                     |
| 6750   | SST                                                              | somatostatin                                                                | -0.23      | CCCTTGCAATAGAACTGAAA    | NM_001048: | NM_001048:                     |
| 6751   | SSTR1                                                            | somatostatin receptor 1                                                     | 0.32       | CACGAACCTATTAAACAACCTA  | NM_001049: | NM_001049:                     |
| 6751   | SSTR1                                                            | somatostatin receptor 1                                                     | 0.84       | CGCGCTGGTGGTGCCTATTAA   | NM_001049: | NM_001049:                     |
| 6752   | SSTR2 (soms somatostatin receptor 2)                             |                                                                             | -14.48     | AGGGTTCATCATCTACACTTT   | NM_001050: | NM_001050:                     |
| 6752   | SSTR2 (soms somatostatin receptor 2)                             |                                                                             | 0.57       | CTACCTGTTTATTATCATCAA   | NM_001050: | NM_001050:                     |
| 6753   | SSTR3 (soms somatostatin receptor 3)                             |                                                                             | 0.82       | CACCAACGCTACATCCTCAA    | NM_001051: | NM_001051:                     |
| 6753   | SSTR3 (soms somatostatin receptor 3)                             |                                                                             | -0.28      | CAGCAGATGCGCATCAGCTA    | NM_001051: | NM_001051:                     |
| 6754   | SSTR4 (soms somatostatin receptor 4)                             |                                                                             | 0.38       | CAGCCTTGATGCCACCGTCAA   | NM_001052: | NM_001052:                     |
| 6754   | SSTR4 (soms somatostatin receptor 4)                             |                                                                             | 0.39       | CAGCGTGGCAAGCTCATCAA    | NM_001052: | NM_001052:                     |
| 6755   | SSTR5 (soms somatostatin receptor 5)                             |                                                                             | -0.59      | CGGGAACAGCGTGCATCTA     | NM_001053: | NM_001053:                     |
| 6755   | SSTR5 (soms somatostatin receptor 5)                             |                                                                             | 0.62       | CGGGCTATGCGAGACCAGCAA   | NM_001053: | NM_001053:                     |
| 29101  | SSU72                                                            | Ssu72 RNA polymerase II CTD phosphatase homolog (yeast)                     | -2.04      | ACGGCAGATGAAAGCAATCAA   | NM_014188: | NM_014188:                     |
| 29101  | SSU72                                                            | Ssu72 RNA polymerase II CTD phosphatase homolog (yeast)                     | -1.37      | ACGGTAGCATTACCAAAATAA   | NM_014188: | NM_014188:                     |
| 6757   | SSX2                                                             | synovial sarcoma, X breakpoint 2                                            | -0.19      | TTGGTCGATTACAGTTGTCAA   | NM_003147: | NM_003147:                     |
| 6767   | ST13                                                             | suppression of tumorigenicity 13 (colon carcinoma) (Hsp70 interacting)      | 0.63       | TACCACATTTCTGAATCATATA  | NM_003932: | NM_003932:                     |
| 6767   | ST13                                                             | suppression of tumorigenicity 13 (colon carcinoma) (Hsp70 interacting)      | 1.19       | TAACTAATTAATTTCTAATA    | NM_003932: | NM_003932:                     |
| 6768   | ST14                                                             | suppression of tumorigenicity 14 (colon carcinoma)                          | -0.10      | AACGTCGTCAGTGTACCCAAA   | NM_021978: | NM_021978:                     |
| 6768   | ST14                                                             | suppression of tumorigenicity 14 (colon carcinoma)                          | -2.71      | CCAGTTCGTCGTCACCCAGCAA  | NM_021978: | NM_021978:                     |
| 23166  | STAB1                                                            | stabilin 1                                                                  | 0.40       | TAGGAACAATGGTCACTGTGA   | NM_015136: | NM_015136:                     |
| 23166  | STAB1                                                            | stabilin 1                                                                  | -0.33      | CACGCCAACTGTAGCCAGGTA   | NM_015136: | NM_015136:                     |
| 55576  | STAB2                                                            | stabilin 2                                                                  | -0.14      | TACGACTTTGGCAACAACAA    | NM_017564: | NM_017564:                     |
| 55576  | STAB2                                                            | stabilin 2                                                                  | 0.96       | TAGGAACGTAAAGTCCCTTAA   | NM_017564: | NM_017564:                     |
| 10274  | STAG1                                                            | stromal antigen 1                                                           | 0.60       | CACGTAGAATCAGATGTCTA    | NM_005862: | NM_005862:                     |
| 10274  | STAG1                                                            | stromal antigen 1                                                           | -0.91      | CAGGATTCGAGGACTGTGTA    | NM_005862: | NM_005862:                     |
| 10617  | STAMPB                                                           | STAM binding protein                                                        | -1.61      | CAGAAATTTGGAAAGCCATTTA  | NM_006463: | NM_201647;NM_006463;NM_213622: |
| 10617  | STAMPB                                                           | STAM binding protein                                                        | -0.79      | CAACTGTAACCTCAGAAATTTAA | NM_006463: | NM_201647;NM_006463;NM_213622: |
| 57559  | STAMPBPL1                                                        | STAM binding protein-like 1                                                 | NM_020799: | CCCAAATACTATGGCCAGATA   | NM_020799: | NM_020799:                     |
| 57559  | STAMPBPL1                                                        | STAM binding protein-like 1                                                 | -2.04      | ACCGTCAACATCAGACACCTA   | NM_020799: | NM_020799:                     |
| 6770   | STAR                                                             | steroidogenic acute regulator                                               | 1.34       | CAGTCAGAAATAAAGATCATA   | NM_000349: | NM_001007243;NM_000349:        |
| 6770   | STAR                                                             | steroidogenic acute regulator                                               | 0.00       | CTGGCAGTACATGTGCACAAA   | NM_000349: | NM_001007243;NM_000349:        |
| 6772   | STAT1                                                            | signal transducer and activator of transcription 1, 91kDa                   | 0.36       | CAGAAAGAGCTTGACAGTAAA   | NM_007315: | NM_139266;NM_007315:           |
| 6772   | STAT1                                                            | signal transducer and activator of transcription 1, 91kDa                   | 0.00       | CCAGATGCTATGATCATTTA    | NM_007315: | NM_139266;NM_007315:           |
| 6773   | STAT2                                                            | signal transducer and activator of transcription 2, 113kDa                  | -0.15      | AACGTTACAGTGTTTCAGGAA   | NM_005419: | NM_005419:                     |
| 6773   | STAT2                                                            | signal transducer and activator of transcription 2, 113kDa                  | 0.30       | TAGGCCGATTAACCTACCTAA   | NM_005419: | NM_005419:                     |
| 6774   | STAT3                                                            | signal transducer and activator of transcription 3 (acute-phase response)   | -0.82      | CAGCCTCTGCGAGAATTTCAA   | NM_003150: | NM_139276;NM_003150;NM_213662: |
| 6774   | STAT3                                                            | signal transducer and activator of transcription 3 (acute-phase response)   | -0.26      | CAGGTGGTGAATTTATATATAA  | NM_003150: | NM_139276;NM_003150;NM_213662: |
| 6775   | STAT4 (signa signal transducer and activator of transcription 4) |                                                                             | -0.82      | CAGCCTCGAATTCGAAGAGAAA  | NM_003151: | NM_003151:                     |
| 6775   | STAT4 (signa signal transducer and activator of transcription 4) |                                                                             | -1.26      | TTGGTACAACGTGCAACCAA    | NM_003151: | NM_003151:                     |
| 6776   | STAT5A                                                           | signal transducer and activator of transcription 5A                         | 0.27       | AACCTTGTGACAAAAGAGGTA   | NM_003152: | NM_003152:                     |
| 6776   | STAT5A                                                           | signal transducer and activator of transcription 5A                         | -0.47      | CGGCACATCTGTCAATGAA     | NM_003152: | NM_003152:                     |
| 6777   | STAT5B                                                           | signal transducer and activator of transcription 5B                         | 0.04       | GCCACCCTAATTTGACATCAA   | NM_012448: | NM_012448:                     |
| 6777   | STAT5B                                                           | signal transducer and activator of transcription 5B                         | -0.86      | CCGCTTGGGAGACTTGAATTA   | NM_012448: | NM_012448:                     |
| 6778   | STAT6                                                            | signal transducer and activator of transcription 6, interleukin-4 inducible | -0.04      | ACGGATAGGCAAGCAATACA    | NM_003153: | NM_003153:                     |
| 6778   | STAT6                                                            | signal transducer and activator of transcription 6, interleukin-4 inducible | -1.64      | CAGGATGGCTCTCCACAGATA   | NM_003153: | NM_003153:                     |
| 6781   | STC1                                                             | stanniocalcin 1                                                             | -0.10      | AACGACTAACCTATGTATGAA   | NM_003155: | NM_003155:                     |
| 6781   | STC1                                                             | stanniocalcin 1                                                             | 1.51       | CTGCTTAAACAAGCAGTATA    | NM_003155: | NM_003155:                     |
| 8614   | STC2                                                             | stanniocalcin 2                                                             | -2.78      | CCGACGGGAGGTTAATACCAA   | NM_003714: | NM_003714:                     |
| 8614   | STC2                                                             | stanniocalcin 2                                                             | -1.67      | CTGGTGAATTCGCACTTACA    | NM_003714: | NM_003714:                     |
| 79689  | STEAP4                                                           | STEAP family member 4                                                       | -0.05      | ACCATGATGAATTCAGTGAA    | NM_024636: | NM_024636:                     |
| 79689  | STEAP4                                                           | STEAP family member 4                                                       | -1.10      | CACAATGGTGACCACCTGATA   | NM_024636: | NM_024636:                     |
| 6793   | STK10                                                            | serine/threonine kinase 10                                                  | -3.24      | CACGGAATFAGAGAACCTGGA   | NM_005990: | NM_005990:                     |
| 6793   | STK10                                                            | serine/threonine kinase 10                                                  | -1.41      | CAGCTCAAATGATGAAGAAA    | NM_005990: | NM_005990:                     |
| 6794   | STK11                                                            | serine/threonine kinase 11                                                  | 0.82       | CAGGAGTGTGCGGTCAATATT   | NM_000455: | NM_000455:                     |
| 6794   | STK11                                                            | serine/threonine kinase 11                                                  | -0.16      | GAAGGCGCTCAAGATCCTCAA   | NM_000455: | NM_000455:                     |
| 114790 | STK11IP                                                          | serine/threonine kinase 11 interacting protein                              | -2.84      | AAAGTTGTTTCCAACCTATAA   | NM_052902: | NM_052902:                     |
| 114790 | STK11IP                                                          | serine/threonine kinase 11 interacting protein                              | -1.27      | CTGTGGTCTTCTGAACTTAA    | NM_052902: | NM_052902:                     |
| 8576   | STK16                                                            | serine/threonine kinase 16                                                  | 0.39       | CACATAGTCTTCTGACTCCAA   | NM_003691: | NM_001008910;NM_003691:        |
| 8576   | STK16                                                            | serine/threonine kinase 16                                                  | -2.83      | CAGGAGAAATGTTAACAAGAA   | NM_003691: | NM_001008910;NM_003691:        |
| 9263   | STK17A                                                           | serine/threonine kinase 17a (apoptosis-inducing)                            | -0.06      | AACCAGGATATTTAACAGGTA   | NM_004760: | NM_004760:                     |
| 9263   | STK17A                                                           | serine/threonine kinase 17a (apoptosis-inducing)                            | 1.49       | TCCATTGTAACCGAAGAGTTA   | NM_004760: | NM_004760:                     |
| 9262   | STK17B                                                           | serine/threonine kinase 17b (apoptosis-inducing)                            | 2.22       | AGCATATATGTTTAACTCA     | NM_004226: | NM_004226:                     |
| 9262   | STK17B                                                           | serine/threonine kinase 17b (apoptosis-inducing)                            | 1.34       | CATGTTAATGAAATAATTCAA   | NM_004226: | NM_004226:                     |
| 8859   | STK19                                                            | serine/threonine kinase 19                                                  | -0.29      | CCCGGAGACCTTTGGAGTTAA   | NM_004197: | NM_032454;NM_004197:           |
| 8859   | STK19                                                            | serine/threonine kinase 19                                                  | 0.00       | CTGTTATTACTCTGCTTTGAA   | NM_004197: | NM_032454;NM_004197:           |
| 26576  | STK23                                                            | serine/threonine kinase 23                                                  | 0.37       | AAGATGAGGCGCAACCGGAAA   | NM_014370: | NM_014370:                     |
| 26576  | STK23                                                            | serine/threonine kinase 23                                                  | -2.42      | AAGCGCTTTTGGGCCCTCAA    | NM_014370: | NM_014370:                     |
| 8428   | STK24                                                            | serine/threonine kinase 24 (STE20 homolog, yeast)                           | 0.34       | CCCAACGACGTTGGAAGGAAA   | NM_003576: | NM_001032296;NM_003576:        |
| 8428   | STK24                                                            | serine/threonine kinase 24 (STE20 homolog, yeast)                           | -0.02      | CTGGAGGGAGCAGCAACCTAA   | NM_003576: | NM_003576:                     |
| 10494  | STK25                                                            | serine/threonine kinase 25 (STE20 homolog, yeast)                           | -4.53      | AAGGCATCGATAACACACAA    | NM_006374: | NM_006374:                     |
| 10494  | STK25                                                            | serine/threonine kinase 25 (STE20 homolog, yeast)                           | -2.24      | CACCAAGCTATGGATCATCAT   | NM_006374: | NM_006374:                     |
| 6788   | STK3                                                             | serine/threonine kinase 3 (STE20 homolog, yeast)                            | 0.14       | CGGCGCCTAAGAGTAACTAA    | NM_006281: | NM_006281:                     |
| 6788   | STK3                                                             | serine/threonine kinase 3 (STE20 homolog, yeast)                            | 0.11       | CGGCGCCTAAGAGTAACTAA    | NM_006281: | NM_006281:                     |
| 56164  | STK31                                                            | serine/threonine kinase 31                                                  | 0.61       | CACAGTACAAGCTAAGTACAA   | NM_031414: | NM_031414;NM_032944:           |
| 56164  | STK31                                                            | serine/threonine kinase 31                                                  | -2.76      | CCGAGTGGATCACTTGCTA     | NM_031414: | NM_031414;NM_032944:           |
| 202374 | STK32A                                                           | serine/threonine kinase 32A                                                 | 1.16       | CCGGATAGTATAAATCGAGGA   | NM_145001: | NM_145001:                     |
| 202374 | STK32A                                                           | serine/threonine kinase 32A                                                 | -0.78      | ATGGGTGTTTCTGCCCGGATA   | NM_145001: | NM_145001:                     |

|        |                |                                                            |       |                        |               |                                          |
|--------|----------------|------------------------------------------------------------|-------|------------------------|---------------|------------------------------------------|
| 55351  | STK32B         | serine/threonine kinase 32B                                | -1.92 | CTGGGACGGGTGTTCAAGAA   | NM_018401:    | NM_018401:                               |
| 55351  | STK32B         | serine/threonine kinase 32B                                | -0.51 | TTGGGCTGAGTTCACGAATTA  | NM_018401:    | NM_018401:                               |
| 282974 | STK32C         | serine/threonine kinase 32C                                | 0.81  | CCGGGCTCGTCCCAACAAA    | NM_173575:    | NM_173575:                               |
| 282974 | STK32C         | serine/threonine kinase 32C                                | 0.29  | TCCGAGAATGACTATCTTCAA  | NM_173575:    | NM_173575:                               |
| 65975  | STK33 (serint) | serine/threonine kinase 33                                 | -2.67 | ATGTGCTAGTGCATCCTTAA   | NM_030906:    | NM_030906:                               |
| 140901 | STK35          | serine/threonine kinase 35                                 | -6.39 | CTCGGCTGTAGGACTCGTAA   | NM_080836:    | NM_080836:                               |
| 140901 | STK35          | serine/threonine kinase 35                                 | 0.00  | TTGGTGGTATGATACATTA    | NM_080836:    | NM_080836:                               |
| 27148  | STK36          | serine/threonine kinase 36 (fused homolog, Drosophila)     | 0.97  | ATGGATGCTGACCTCCTTATA  | NM_015690:    | NM_015690:                               |
| 27148  | STK36          | serine/threonine kinase 36 (fused homolog, Drosophila)     | -2.77 | CCAGTTGGTGCAGCCCTGTA   | NM_015690:    | NM_015690:                               |
| 11329  | STK38          | serine/threonine kinase 38                                 | 0.37  | AACCTTTCGCTCAACATGAA   | NM_007271:    | NM_007271:                               |
| 11329  | STK38          | serine/threonine kinase 38                                 | -0.19 | TACGTCGGCCATAAACAGCTA  | NM_007271:    | NM_007271:                               |
| 23012  | STK38L         | serine/threonine kinase 38 like                            | 1.13  | AGGGAGATGACTGTATTATA   | NM_015000:    | NM_015000:                               |
| 23012  | STK38L         | serine/threonine kinase 38 like                            | 0.10  | CAGCAGCAATCCCTATAGAAA  | NM_015000:    | NM_015000:                               |
| 27347  | STK39          | serine threonine kinase 39 (STE20/SPS1 homolog, yeast)     | 1.48  | TGGAATAGTCTCAGATCTAAA  | NM_013233:    | NM_013233:                               |
| 27347  | STK39          | serine threonine kinase 39 (STE20/SPS1 homolog, yeast)     | 1.27  | TTGGAGTATTGTAACTTCTA   | NM_013233:    | NM_013233:                               |
| 6789   | STK4           | serine/threonine kinase 4                                  | 0.57  | AGGATTCATAGCATCAGTATA  | NM_006282:    | NM_006282:                               |
| 6789   | STK4           | serine/threonine kinase 4                                  | 0.63  | CACCATTTGCTGCGAATTA    | NM_006282:    | NM_006282:                               |
| 83931  | STK40          | serine/threonine kinase 40                                 | -2.63 | CAGCGCTACTGCGGAAATATA  | NM_032017:    | NM_032017:                               |
| 83931  | STK40          | serine/threonine kinase 40                                 | -0.27 | CCGGATGGTTAAGAAGATGAA  | NM_032017:    | NM_032017:                               |
| 30968  | STOML2         | stomatatin (EPB72)-like 2                                  | -0.98 | CTCGACAATGTAACTCTGCAA  | NM_013442:    | NM_013442:                               |
| 30968  | STOML2         | stomatatin (EPB72)-like 2                                  | 1.07  | TTGAACCTTAGCGTGTAAATA  | NM_013442:    | NM_013442:                               |
| 11171  | STRAP          | serine/threonine kinase receptor associated protein        | 0.98  | AAACCTTATAAGTATGATTAT  | NM_007178:    | NM_007178:                               |
| 11171  | STRAP          | serine/threonine kinase receptor associated protein        | 1.47  | AACTTTATAAGTATGATTATA  | NM_007178:    | NM_007178:                               |
| 412    | STS            | steroid sulfatase (microsomal), arylsulfatase C, isozyme S | 0.44  | TAGATTAATGACGTATACATA  | NM_000351:    | NM_000351:                               |
| 412    | STS            | steroid sulfatase (microsomal), arylsulfatase C, isozyme S | -0.20 | AAGCCTCCTATGGAAATGATA  | NM_000351:    | NM_000351:                               |
| 84959  | STS-1          | Cbl-interacting protein Sts-1                              | 1.72  | CCGCTTAAGGATGCTAACAT   | NM_032873:    | NM_032873:                               |
| 84959  | STS-1          | Cbl-interacting protein Sts-1                              | -1.21 | CCGGCTATTGTAGTGACAAA   | NM_032873:    | NM_032873:                               |
| 10273  | STUB1          | STIP1 homology and U-box containing protein 1              | -1.18 | CCAGCTGGAGATGGAGAGCTA  | NM_005861:    | NM_005861:                               |
| 10273  | STUB1          | STIP1 homology and U-box containing protein 1              | -0.91 | CCGGGCTTGTGCTACCTGAA   | NM_005861:    | NM_005861:                               |
| 8677   | STX10          | syntaxin 10                                                | 0.50  | CTGGAAGAGACCATCGTATA   | NM_003765:    | NM_003765:                               |
| 8677   | STX10          | syntaxin 10                                                | -6.32 | CAGAGAGATCTCCAGGCGAA   | NM_003765:    | NM_003765:                               |
| 8676   | STX11 (synta)  | syntaxin 11                                                | -1.36 | CGCCAGTTCAGAATTGCAA    | NM_003764:    | NM_003764:                               |
| 8676   | STX11 (synta)  | syntaxin 11                                                | 0.09  | AGCACTCAAAATGAAGTATCA  | NM_003764:    | NM_003764:                               |
| 23673  | STX12          | syntaxin 12                                                | 0.41  | CTGGGTTAAAGTTTACTTCA   | NM_177424:    | NM_177424:                               |
| 23673  | STX12          | syntaxin 12                                                | 1.05  | TCCTTCTGTTATTATACTTAA  | NM_177424:    | NM_177424:                               |
| 8675   | STX16          | syntaxin 16                                                | -1.08 | CGCGATTAAGCAGAAGATGAA  | NM_001001433: | NM_003763:NM_001001433:NM_001001434:     |
| 8675   | STX16          | syntaxin 16                                                | 0.95  | ACCATCACTTATGTTAATTTAA | NM_001001433: | NM_003763:NM_001001433:NM_001001434:     |
| 55014  | STX17          | syntaxin 17                                                | -1.41 | ACCCTGAATGGAGACCTTAA   | NM_017919:    | NM_017919:                               |
| 55014  | STX17          | syntaxin 17                                                | -0.23 | CTCCTATAAACCCTTAGGTAAA | NM_017919:    | NM_017919:                               |
| 415117 | STX19          | syntaxin 19                                                | -0.77 | CAGCGAAGATACATCAACAGA  | NM_001001850: | NM_001001850:                            |
| 415117 | STX19          | syntaxin 19                                                | -0.04 | TACAGAAATCAATATCACTAA  | NM_001001850: | NM_001001850:                            |
| 6804   | STX1A          | syntaxin 1A (brain)                                        | 0.67  | CGACATAAAGAGACAGCAAAA  | NM_004603:    | NM_004603:                               |
| 6804   | STX1A          | syntaxin 1A (brain)                                        | -0.46 | AGAACTCATGTCCGACATATA  | NM_004603:    | NM_004603:                               |
| 112755 | STX1B2 (synt)  | syntaxin 1B2                                               | 0.05  | AAGTTCGGTCCAAATGAAA    | NM_052874:    | NM_052874:                               |
| 112755 | STX1B2 (synt)  | syntaxin 1B2                                               | 0.64  | ACCTAATGCAACAGCAACAAA  | NM_052874:    | NM_052874:                               |
| 6809   | STX3A (synta)  | syntaxin 3A                                                | 0.15  | CAGCCTTAAATTAAGCTCTTA  | NM_004177:    | NM_004177:                               |
| 6809   | STX3A (synta)  | syntaxin 3A                                                | 0.10  | CCCGGAAGAAATGATAAATA   | NM_004177:    | NM_004177:                               |
| 6810   | STX4A          | syntaxin 4A (placental)                                    | -5.92 | AAGCGAGGTGTTTGTGCCAA   | NM_004604:    | NM_004604:                               |
| 6810   | STX4A          | syntaxin 4A (placental)                                    | -0.02 | TCCGGACAATTCGGCAGACTA  | NM_004604:    | NM_004604:                               |
| 6811   | STX5A          | syntaxin 5A                                                | 0.47  | ATCAATAGCCTCAACAAACAA  | NM_003164:    | NM_003164:                               |
| 6811   | STX5A          | syntaxin 5A                                                | 0.08  | AAGTCCCTCTTGTATGATAAA  | NM_003164:    | NM_003164:                               |
| 10228  | STX6 (syntaxi) | syntaxin 6                                                 | -1.83 | AACCTAGTCAATTAATGAGTAA | NM_005819:    | NM_005819:                               |
| 10228  | STX6 (syntaxi) | syntaxin 6                                                 | 0.81  | CTGAAGCTAATAGAGAACAAA  | NM_005819:    | NM_005819:                               |
| 8417   | STX7 (syntaxi) | syntaxin 7                                                 | 0.77  | TCTGATGAATTAGCGAATATA  | NM_003569:    | NM_003569:                               |
| 8417   | STX7 (syntaxi) | syntaxin 7                                                 | -4.11 | CAGCAGTACTAACCAGCTT    | NM_003569:    | NM_003569:                               |
| 9482   | STX8           | syntaxin 8                                                 | -0.75 | AACCTCTGGAGATCTTGTGA   | NM_004853:    | NM_004853:                               |
| 9482   | STX8           | syntaxin 8                                                 | 0.96  | AACGAAATCAATATGAACGAA  | NM_004853:    | NM_004853:                               |
| 55359  | STYK1          | serine/threonine/tyrosine kinase 1                         | -0.82 | CTGGGCTGCAAGATATCAATA  | NM_018423:    | NM_018423:                               |
| 55359  | STYK1          | serine/threonine/tyrosine kinase 1                         | -0.82 | TTACCTTAGGTATAGATAAAA  | NM_018423:    | NM_018423:                               |
| 6815   | STYX (serine)  | serine/threonine/tyrosine interacting protein              | -1.03 | AAGAGTACTATGCAAAAGTAA  | NM_145251:    | NM_145251:                               |
| 6815   | STYX (serine)  | serine/threonine/tyrosine interacting protein              | 2.05  | ATGATTTAAATAGAATCTAA   | NM_145251:    | NM_145251:                               |
| 51657  | STYXL1         | serine/threonine/tyrosine interacting-like 1               | 0.04  | AAGCTTCTGCACATCCGGATA  | NM_016086:    | NM_016086:                               |
| 51657  | STYXL1         | serine/threonine/tyrosine interacting-like 1               | -0.64 | CAAGATTCAAGAGGACTTGAA  | NM_016086:    | NM_016086:                               |
| 56670  | SUCNR1         | succinate receptor 1                                       | -0.47 | AACCTTAGAGTACTACCCTA   | NM_033050:    | NM_033050:                               |
| 56670  | SUCNR1         | succinate receptor 1                                       | -1.53 | TACCATTGTTTTCACGGCTA   | NM_033050:    | NM_033050:                               |
| 51684  | SUFU           | suppressor of fused homolog (Drosophila)                   | -0.50 | CCAGGTTACCCTATCGTCAA   | NM_016169:    | NM_016169:                               |
| 51684  | SUFU           | suppressor of fused homolog (Drosophila)                   | -1.12 | GAGCGTACATCTGAAATTTAA  | NM_016169:    | NM_016169:                               |
| 129025 | SUHW1          | suppressor of hairy wing homolog 1 (Drosophila)            | -6.74 | CCCGAGGTGGAGACAAAGGAA  | NM_080740:    | NM_080740:                               |
| 129025 | SUHW1          | suppressor of hairy wing homolog 1 (Drosophila)            | 1.27  | CTGGATGCACCTCGCAACTTTA | NM_080740:    | NM_080740:                               |
| 140883 | SUHW2          | suppressor of hairy wing homolog 2 (Drosophila)            | 1.32  | CCCAACTTGAATCGAGATCAA  | NM_080764:    | NM_080764:                               |
| 140883 | SUHW2          | suppressor of hairy wing homolog 2 (Drosophila)            | 0.52  | TAGCCGTTAGTGGAGAATGAA  | NM_080764:    | NM_080764:                               |
| 23213  | SULF1          | sulfatase 1                                                | 0.48  | CTGGTGTTCGCTACAGTTAA   | NM_015170:    | NM_015170:                               |
| 23213  | SULF1          | sulfatase 1                                                | 0.26  | TCCGTCGAATTTGAAGGTGAA  | NM_015170:    | NM_015170:                               |
| 55959  | SULF2          | sulfatase 2                                                | 0.08  | ATGACAGATTCGGAGGATATA  | NM_018837:    | NM_198596:NM_018837:                     |
| 55959  | SULF2          | sulfatase 2                                                | -6.33 | TGCAAGTGGCCAGAAATGAA   | NM_018837:    | NM_018837:                               |
| 7341   | SUMO1          | SMT3 suppressor of mif two 3 homolog 1 (yeast)             | 1.46  | CAGTTACCTAATCATGTGAA   | NM_003352:    | NM_003352:                               |
| 7341   | SUMO1          | SMT3 suppressor of mif two 3 homolog 1 (yeast)             | 0.70  | CTGAATCAAGGATTTAATATA  | NM_003352:    | NM_001005782:NM_001005781:NM_003352:     |
| 6613   | SUMO2          | SMT3 suppressor of mif two 3 homolog 2 (yeast)             | 0.53  | GCCTCTTGTGTTTAAATATA   | NM_006937:    | NM_001005849:NM_006937:                  |
| 6613   | SUMO2          | SMT3 suppressor of mif two 3 homolog 2 (yeast)             | 0.49  | GTCAAGCGCTTGTGTTTAA    | NM_006937:    | NM_001005849:NM_006937:                  |
| 6612   | SUMO3          | SMT3 suppressor of mif two 3 homolog 3 (yeast)             | 0.11  | TTGGATCTATACCAATTTAA   | NM_006936:    | NM_006936:                               |
| 6612   | SUMO3          | SMT3 suppressor of mif two 3 homolog 3 (yeast)             | -2.47 | CAGTTATGTTGCTGTATATA   | NM_006936:    | NM_006936:                               |
| 11198  | SUPT16H        | suppressor of Ty 16 homolog (S. cerevisiae)                | 0.22  | ACCGGAGTAATCCGAACTGA   | NM_007192:    | NM_007192:                               |
| 11198  | SUPT16H        | suppressor of Ty 16 homolog (S. cerevisiae)                | -5.89 | ACCGCATATTCCGGAATGAA   | NM_007192:    | NM_007192:                               |
| 6834   | SURF1 (surfe)  | surfeit 1                                                  | -2.33 | CTGGATCATGTGCTACTGGTA  | NM_003172:    | NM_003172:                               |
| 6834   | SURF1 (surfe)  | surfeit 1                                                  | 0.94  | CTGGATAATGCAGATTTTCAA  | NM_003172:    | NM_003172:                               |
| 6839   | SUV39H1        | suppressor of variegation 3-9 homolog 1 (Drosophila)       | 0.55  | CAGGTGTACAACCTCTTATA   | NM_003173:    | NM_003173:                               |
| 6839   | SUV39H1        | suppressor of variegation 3-9 homolog 1 (Drosophila)       | 0.31  | CGGGTCCGATTTGAATGCAA   | NM_003173:    | NM_003173:                               |
| 79723  | SUV39H2        | suppressor of variegation 3-9 homolog 2 (Drosophila)       | 0.30  | AAGCGTTAAGCTGATAATGTA  | NM_024670:    | NM_024670:                               |
| 79723  | SUV39H2        | suppressor of variegation 3-9 homolog 2 (Drosophila)       | 1.48  | CGCGGAGGATATGGAATATTA  | NM_024670:    | NM_024670:                               |
| 51111  | SUV420H1       | suppressor of variegation 4-20 homolog 1 (Drosophila)      | -1.65 | CAAGAGTTAGTCAATCAATTA  | NM_016028:    | NM_016028:                               |
| 51111  | SUV420H1       | suppressor of variegation 4-20 homolog 1 (Drosophila)      | -0.87 | TTGGTGGTGTGATTGCGGAA   | NM_016028:    | NM_017635:NM_016028:                     |
| 84787  | SUV420H2       | suppressor of variegation 4-20 homolog 2 (Drosophila)      | -0.49 | AATGACTTCAGCATCATGTAC  | NM_032701:    | NM_032701:                               |
| 84787  | SUV420H2       | suppressor of variegation 4-20 homolog 2 (Drosophila)      | -1.32 | AAGAAGAATGAGCACTGTGAA  | NM_032701:    | NM_032701:                               |
| 6840   | SVIL           | supervillin                                                | 2.74  | CCGAGTATTTATCCCGCTATA  | NM_003174:    | NM_003174:NM_021738:                     |
| 6840   | SVIL           | supervillin                                                | -5.50 | CAGGACTGATGTCAAGGCATA  | NM_003174:    | NM_003174:NM_021738:                     |
| 6850   | SYK (spleen t  | spleen tyrosine kinase                                     | -0.03 | CAGCGGTTGGAATAATCTCAA  | NM_003177:    | NM_003177:                               |
| 6850   | SYK (spleen t  | spleen tyrosine kinase                                     | 0.38  | CCCGCTCTTAAAGATGAGTTA  | NM_003177:    | NM_003177:                               |
| 23345  | SYNE1          | spectrin repeat containing, nuclear envelope 1             | -0.66 | CAGGAGCTCAGAGAGACATA   | NM_015293:    | NM_015293:NM_033071:NM_133650:NM_182961: |

|        |         |                                                                            |       |                         |               |                                                        |
|--------|---------|----------------------------------------------------------------------------|-------|-------------------------|---------------|--------------------------------------------------------|
| 23345  | SYNE1   | spectrin repeat containing, nuclear envelope 1                             | -0.73 | CTCGGAAGAAATACAGAGAAA   | NM_015293:    | NM_015293:NM_033071:NM_133650:NM_182961:               |
| 23224  | SYNE2   | spectrin repeat containing, nuclear envelope 2                             | -1.33 | CAGAACTAGTGTATTAGTTTA   | NM_015180:    | NM_015180:NM_182910:NM_182912:NM_182913:<br>NM_182914: |
| 23224  | SYNE2   | spectrin repeat containing, nuclear envelope 2                             | -3.15 | CTGGTAGAACGCTCAACCTCAA  | NM_015180:    | NM_015180:NM_182910:NM_182912:NM_182913:<br>NM_182914: |
| 8831   | SYNGAP1 | synaptic Ras GTPase activating protein 1 homolog (rat)                     | 0.33  | ACGCTTGCCACTAAAGCCATA   | NM_006772:    | NM_006772:                                             |
| 8831   | SYNGAP1 | synaptic Ras GTPase activating protein 1 homolog (rat)                     | -0.03 | CCGGCTGATGCAAAAGCTTTA   | NM_006772:    | NM_006772:                                             |
| 8867   | SYNJ1   | synaptotaxin 1                                                             | -2.61 | CAGAAAGATAACGCCATGCAA   | NM_003895:    | NM_003895:NM_003895:                                   |
| 8867   | SYNJ1   | synaptotaxin 1                                                             | -2.24 | AAGGCTCAGCTATCTGTTCAA   | NM_003895:    | NM_203446:NM_003895:                                   |
| 8871   | SYNJ2   | synaptotaxin 2                                                             | 0.52  | TTGGTTCAGATACCAAAATAA   | NM_003898:    | NM_003898:                                             |
| 8871   | SYNJ2   | synaptotaxin 2                                                             | 0.71  | CACCATCTAGTCCATTATAA    | NM_003898:    | NM_003898:                                             |
| 84447  | SYVN1   | synovial apoptosis inhibitor 1, synoviolin                                 | -0.66 | CTGGCTTTCCAGTTTAGAAA    | NM_032431:    | NM_032431:NM_172230:                                   |
| 84447  | SYVN1   | synovial apoptosis inhibitor 1, synoviolin                                 | 0.89  | TGGCAGAACTCTGAAAGTTTA   | NM_032431:    | NM_032431:NM_172230:                                   |
| 134864 | TAAR1   | trace amine associated receptor 1                                          | -0.73 | AGGCGCTGAAGAGATATATTA   | NM_138327:    | NM_138327:                                             |
| 134864 | TAAR1   | trace amine associated receptor 1                                          | 1.15  | CAGAATATATCTTATCGCTAA   | NM_138327:    | NM_138327:                                             |
| 9287   | TAAR2   | trace amine associated receptor 2                                          | 0.15  | CACATGTAATCCGTTAATATA   | NM_014626:    | NM_014626:NM_001033080:                                |
| 9287   | TAAR2   | trace amine associated receptor 2                                          | -0.10 | CAGGATCCATATTCATCACC    | NM_014626:    | NM_014626:NM_001033080:                                |
| 9038   | TAAR5   | trace amine associated receptor 5                                          | 1.28  | CACCATAGACAGCATGGTCTGA  | NM_003967:    | NM_003967:                                             |
| 9038   | TAAR5   | trace amine associated receptor 5                                          | -0.62 | CTGCCTCATTATGATCAGCTT   | NM_003967:    | NM_003967:                                             |
| 319100 | TAAR6   | trace amine associated receptor 6                                          | -1.78 | ACCCATGGTTTAGGAAAGCAA   | NM_175067:    | NM_175067:                                             |
| 319100 | TAAR6   | trace amine associated receptor 6                                          | 0.12  | CCGGGTGATTCGTACATAGT    | NM_175067:    | NM_175067:                                             |
| 83551  | TAAR8   | trace amine associated receptor 8                                          | -0.08 | ATGGGCTGGAGGAATAGTAA    | NM_053278:    | NM_053278:                                             |
| 83551  | TAAR8   | trace amine associated receptor 8                                          | 0.65  | GTGAATGGATCTGTTATTGAA   | NM_053278:    | NM_053278:                                             |
| 134860 | TAAR9   | trace amine associated receptor 9                                          | 2.20  | CATGGTGTATATACAGTAA     | NM_175057:    | NM_175057:                                             |
| 134860 | TAAR9   | trace amine associated receptor 9                                          | -0.30 | TAAGGACTGATTCGTCAACAA   | NM_175057:    | NM_175057:                                             |
| 257397 | TAB3    | TAK1-binding protein 3                                                     | 0.88  | CTCGGTATAGTACAAATCCAA   | NM_152787:    | NM_198312:NM_152787:                                   |
| 257397 | TAB3    | TAK1-binding protein 3                                                     | 0.26  | GCGGTTGAAGCTCGAAGTTAA   | NM_152787:    | NM_198312:NM_152787:                                   |
| 6863   | TAC1    | tachykinin, precursor 1 (substance K, substance P, neurokinin 1, neuronin) | 0.03  | ATGCACTATGAGGAATAATTA   | NM_003182:    | NM_013997:NM_003182:NM_013996:NM_013998:               |
| 6863   | TAC1    | tachykinin, precursor 1 (substance K, substance P, neurokinin 1, neuronin) | -0.03 | CACGTATTGTATCTCTGAA     | NM_003182:    | NM_013997:NM_003182:NM_013996:NM_013998:               |
| 6866   | TAC3    | tachykinin 3 (neurokinin K, neurokinin beta)                               | -3.03 | CCCCGAGAAACGTGACATGCAT  | NM_001006667: | NM_001006667:NM_013251:                                |
| 6866   | TAC3    | tachykinin 3 (neurokinin K, neurokinin beta)                               | 0.14  | TCCTGTAGTGTCTACATTTAA   | NM_001006667: | NM_001006667:NM_013251:                                |
| 6869   | TACR1   | tachykinin receptor 1                                                      | -2.31 | CACATAACACCTCGGAAACCCAA | NM_001058:    | NM_015727:NM_001058:                                   |
| 6869   | TACR1   | tachykinin receptor 1                                                      | 0.60  | TACGCCTAGCTCGAAATGGA    | NM_001058:    | NM_001058:                                             |
| 6865   | TACR2   | tachykinin receptor 2                                                      | -7.66 | CGCGGTGATGTTTGTAGCCTTA  | NM_001057:    | NM_001057:                                             |
| 6865   | TACR2   | tachykinin receptor 2                                                      | 1.76  | CTCCCTTCCACGAGAGTCAA    | NM_001057:    | NM_001057:                                             |
| 6870   | TACR3   | tachykinin receptor 3                                                      | -0.63 | CGCCTTCAACACGTTGGTCAA   | NM_001059:    | NM_001059:                                             |
| 6870   | TACR3   | tachykinin receptor 3                                                      | 1.24  | TACCATATATCGCTATTATA    | NM_001059:    | NM_001059:                                             |
| 4070   | TACSTD2 | tumor-associated calcium signal transducer 2                               | 0.12  | CTCGAAATAGTGGTACTATT    | NM_002353:    | NM_002353:                                             |
| 4070   | TACSTD2 | tumor-associated calcium signal transducer 2                               | -0.40 | TTGCGACATTTGTAAGGCTTA   | NM_002353:    | NM_002353:                                             |
| 6881   | TAF10   | TAF10 RNA polymerase II, TATA box binding protein (TBP)-associated         | -0.70 | AAGGACCGCAAGTACACTCTA   | NM_006284:    | NM_006284:                                             |
| 6881   | TAF10   | TAF10 RNA polymerase II, TATA box binding protein (TBP)-associated         | -0.17 | CACCTGAGCCACCCAACTTAA   | NM_006284:    | NM_006284:                                             |
| 8148   | TAF15   | TAF15 RNA polymerase II, TATA box binding protein (TBP)-associated         | 0.64  | TCAGGCTATGATCAACATCAA   | NM_003487:    | NM_003487:NM_139215:                                   |
| 8148   | TAF15   | TAF15 RNA polymerase II, TATA box binding protein (TBP)-associated         | 2.02  | CTCCAGTTATGGACAAAGTTA   | NM_003487:    | NM_003487:                                             |
| 83860  | TAF3    | TAF3 RNA polymerase II, TATA box binding protein (TBP)-associated          | -5.01 | CCGGAGTGTACTACTCCCAAA   | XM_291729:    | XM_291729:                                             |
| 83860  | TAF3    | TAF3 RNA polymerase II, TATA box binding protein (TBP)-associated          | 1.98  | CTGCATCATGCCACCAATAA    | XM_291729:    | XM_291729:                                             |
| 389932 | IAKR    | aldo-keto reductase, truncated                                             | 0.63  | AAGTTGCTATGAGTAATGTA    | XM_372302:    | XM_372302:                                             |
| 389932 | IAKR    | aldo-keto reductase, truncated                                             | 0.49  | AAGATATATTCTATACCACAA   | XM_372302:    | XM_372302:                                             |
| 6886   | TAL1    | T-cell acute lymphocytic leukemia 1                                        | 0.85  | TCGGGAAGATTTCTAAATAAA   | NM_003189:    | NM_003189:                                             |
| 6886   | TAL1    | T-cell acute lymphocytic leukemia 1                                        | -1.22 | TCCTCAACGTGTTACTGTAT    | NM_003189:    | NM_003189:                                             |
| 6887   | TAL2    | T-cell acute lymphocytic leukemia 2                                        | 0.61  | AAACGCTCCGCTGGCAATGA    | NM_005421:    | NM_005421:                                             |
| 6887   | TAL2    | T-cell acute lymphocytic leukemia 2                                        | -1.37 | CCCCTCACCCCTCCAGACAAA   | NM_005421:    | NM_005421:                                             |
| 6888   | TALDO1  | transaldolase 1                                                            | -2.20 | CCGCAACCGGGCGAGATCAA    | NM_006755:    | NM_006755:                                             |
| 6888   | TALDO1  | transaldolase 1                                                            | 0.51  | TACAAGAAGTTTAGCTACAAA   | NM_006755:    | NM_006755:                                             |
| 10010  | TANK    | TRAF family member-associated NFKB activator                               | -0.26 | ATCCTTATAGTATGCTGCTACA  | NM_004180:    | NM_004180:NM_133484:                                   |
| 10010  | TANK    | TRAF family member-associated NFKB activator                               | 0.26  | CAGACTATTATTGACAAGCTA   | NM_004180:    | NM_004180:NM_133484:                                   |
| 57551  | TAOK1   | TAO kinase 1                                                               | 0.04  | AAGGATCGGGATAGCAGTATA   | NM_020791:    | NM_020791:                                             |
| 57551  | TAOK1   | TAO kinase 1                                                               | 1.89  | CAGCTGGAATATAAAGCGA     | NM_020791:    | NM_020791:                                             |
| 9344   | TAOK2   | TAO kinase 2                                                               | 0.08  | AACGGAACCCACCGCTCTTTA   | NM_004783:    | NM_004783:NM_016151:                                   |
| 9344   | TAOK2   | TAO kinase 2                                                               | 0.06  | ATCGAGCTGGCTGAACGGAAA   | NM_004783:    | NM_004783:NM_016151:                                   |
| 9344   | TAOK2   | TAO kinase 2                                                               | 0.18  | AACGGAACCCACCGCTCTTTA   | NM_016151:    | NM_004783:NM_016151:                                   |
| 9344   | TAOK2   | TAO kinase 2                                                               | -0.02 | ATCGAGCTGGCTGAACGGAAA   | NM_016151:    | NM_004783:NM_016151:                                   |
| 51347  | TAOK3   | TAO kinase 3                                                               | 0.39  | CAACACGTATAAAGCACTCAA   | NM_016281:    | NM_016281:                                             |
| 51347  | TAOK3   | TAO kinase 3                                                               | -6.18 | CAGCTCCTCGCTGCTGCTAA    | NM_016281:    | NM_016281:                                             |
| 6890   | TAP1    | transporter 1, ATP-binding cassette, sub-family B (MDR/TAP)                | 1.04  | AGGCGGAAGCCGCAAGTTTA    | NM_000593:    | NM_000593:                                             |
| 6890   | TAP1    | transporter 1, ATP-binding cassette, sub-family B (MDR/TAP)                | 0.29  | CGGGATCTATAACACACCAT    | NM_000593:    | NM_000593:                                             |
| 6891   | TAP2    | transporter 2, ATP-binding cassette, sub-family B (MDR/TAP)                | 1.13  | CCCTATGAGTTGGTTATTAT    | NM_000544:    | NM_000544:                                             |
| 6891   | TAP2    | transporter 2, ATP-binding cassette, sub-family B (MDR/TAP)                | -0.19 | TAGCGACATTTGGTAACAGCTA  | NM_000544:    | NM_000544:                                             |
| 6892   | TAPBP   | TAP binding protein (tapasin)                                              | -0.68 | TCGTTAGGAATAAAGCTGTA    | NM_003190:    | NM_003190:                                             |
| 6892   | TAPBP   | TAP binding protein (tapasin)                                              | 0.28  | TAGCTGCTGGATGTTGACGAA   | NM_003190:    | NM_003190:                                             |
| 55080  | TAPBPL  | TAP binding protein-like                                                   | -3.46 | TAGCATCTCCTGGTGTATGAA   | NM_018009:    | NM_018009:                                             |
| 55080  | TAPBPL  | TAP binding protein-like                                                   | 0.06  | AAGGCCCTCCCTTGCTGCTGAA  | NM_018009:    | NM_018009:                                             |
| 6897   | TARS    | threonyl-tRNA synthetase                                                   | 0.43  | CACCGTTATTGCTAAAGTAAA   | NM_152295:    | NM_152295:                                             |
| 6897   | TARS    | threonyl-tRNA synthetase                                                   | 0.37  | GAGGAACAGCGTTCCCGTAAA   | NM_152295:    | NM_152295:                                             |
| 80835  | TAS1R1  | taste receptor, type 1, member 1                                           | 0.24  | CAAGGACACTGTGGCGTTTAA   | NM_138697:    | NM_138697:NM_177541:NM_177540:                         |
| 80835  | TAS1R1  | taste receptor, type 1, member 1                                           | -2.16 | CTCCATGAGTTCTGCCTACAA   | NM_138697:    | NM_138697:NM_177539:                                   |
| 80834  | TAS1R2  | taste receptor, type 1, member 2                                           | -0.01 | CACACTGAAGATGAATATGAA   | NM_152232:    | NM_152232:                                             |
| 80834  | TAS1R2  | taste receptor, type 1, member 2                                           | 0.19  | CAGCGTGTACTCTGCGGTCTA   | NM_152232:    | NM_152232:                                             |
| 50834  | TAS2R1  | taste receptor, type 2, member 1                                           | -1.48 | CTGGACACTCTCTCATCTTAA   | NM_019599:    | NM_019599:                                             |
| 50834  | TAS2R1  | taste receptor, type 2, member 1                                           | 1.00  | TGCAATTCCTTTATTTATAA    | NM_019599:    | NM_019599:                                             |
| 50833  | TAS2R16 | taste receptor, type 2, member 16                                          | 0.97  | ATCACCATTAATAGTACTCTA   | NM_016945:    | NM_016945:                                             |
| 50833  | TAS2R16 | taste receptor, type 2, member 16                                          | -4.22 | TACCGTGTCTACTGCATCAA    | NM_016945:    | NM_016945:                                             |
| 50831  | TAS2R3  | taste receptor, type 2, member 3                                           | 1.05  | AGGGATAAATAATGCAAAATT   | NM_016943:    | NM_016943:                                             |
| 50831  | TAS2R3  | taste receptor, type 2, member 3                                           | 0.12  | CAGGGATAAATAATGCAAAATT  | NM_016943:    | NM_016943:                                             |
| 5726   | TAS2R38 | taste receptor, type 2, member 38                                          | -1.95 | AAGGCACATGAGGACAATGAA   | NM_176817:    | NM_176817:                                             |
| 5726   | TAS2R38 | taste receptor, type 2, member 38                                          | -0.38 | AAGGCTCAACTGGCAGAATAA   | NM_176817:    | NM_176817:                                             |
| 50832  | TAS2R4  | taste receptor, type 2, member 4                                           | -0.04 | CAGGACATCTCTGCTCATTA    | NM_016944:    | NM_016944:                                             |
| 50832  | TAS2R4  | taste receptor, type 2, member 4                                           | -3.08 | CTGGTTTGTGACCTTGCTCAA   | NM_016944:    | NM_016944:                                             |
| 54429  | TAS2R5  | taste receptor, type 2, member 5                                           | 0.63  | GCGGTTGGCTGCTATCTTAA    | NM_018980:    | NM_018980:                                             |
| 54429  | TAS2R5  | taste receptor, type 2, member 5                                           | -0.10 | TCGGTTAAATGGAAATGAAA    | NM_018980:    | NM_018980:                                             |
| 338398 | TAS2R60 | taste receptor, type 2, member 60                                          | -2.07 | CAGGCTGAGAGCTGTGCTGAA   | NM_177437:    | NM_177437:                                             |
| 338398 | TAS2R60 | taste receptor, type 2, member 60                                          | -0.80 | TCCGATGGCCTCCCATACAAA   | NM_177437:    | NM_177437:                                             |
| 50835  | TAS2R9  | taste receptor, type 2, member 9                                           | -0.58 | CTGGGTGAAGCTAAAGATCAA   | NM_023917:    | NM_023917:                                             |
| 50835  | TAS2R9  | taste receptor, type 2, member 9                                           | 0.88  | TGGATTCACTACTAGTTTAA    | NM_023917:    | NM_023917:                                             |
| 6898   | TAT     | tyrosine tyrosine aminotransferase                                         | 0.51  | CAAGCTATTGACCTTTGTTTA   | NM_000353:    | NM_000353:                                             |
| 6898   | TAT     | tyrosine tyrosine aminotransferase                                         | -3.64 | TCGGCAAAATATATGGCTAT    | NM_000353:    | NM_000353:                                             |
| 8887   | TAX1BP1 | Tax1 (human T-cell leukemia virus type I) binding protein 1                | 1.14  | CAGATCAATCAGCTAAATAA    | NM_006024:    | NM_006024:                                             |

|        |          |                                                                           |       |                        |            |                                          |
|--------|----------|---------------------------------------------------------------------------|-------|------------------------|------------|------------------------------------------|
| 8887   | TAX1BP1  | Tax1 (human T-cell leukemia virus type I) binding protein 1               | -0.08 | CAGTCTTTGGCTTATCAATAA  | NM_006024: | NM_006024:                               |
| 23216  | TBC1D1   | TBC1 (tre-2/USP6, BUB2, cdc16) domain family, member 1                    | 0.80  | TTCCGCTAGATGTAACCTTATA | NM_015173: | NM_015173:                               |
| 23216  | TBC1D1   | TBC1 (tre-2/USP6, BUB2, cdc16) domain family, member 1                    | -0.56 | AAGGATGTGCCATCAACAAGAA | NM_015173: | NM_015173:                               |
| 25771  | TBC1D22A | TBC1 domain family, member 22A                                            | -0.23 | TGGGATTCAAATGAAAGTGAA  | NM_014346: | NM_014346:                               |
| 25771  | TBC1D22A | TBC1 domain family, member 22A                                            | -1.19 | TACGCTCAGGGTATAAATGAT  | NM_014346: | NM_014346:                               |
| 55773  | TBC1D23  | TBC1 domain family, member 23                                             | 1.36  | AGCGCTGAATCTGTAGTTAA   | NM_018309: | NM_018309:                               |
| 55773  | TBC1D23  | TBC1 domain family, member 23                                             | 0.70  | AGGGAGATTGTTTCACGGAAA  | NM_018309: | NM_018309:                               |
| 6905   | TBCE     | tubulin-specific chaperone e                                              | -0.78 | CCGGGCTCCATGACAACTCAA  | NM_003193: | NM_003193:                               |
| 6905   | TBCE     | tubulin-specific chaperone e                                              | 0.33  | CTGAAATATGGTGACCTGAA   | NM_003193: | NM_003193:                               |
| 29110  | TBK1     | TANK-binding kinase 1                                                     | 0.28  | CAGAACGTAGATTAGCTTATA  | NM_013254: | NM_013254:                               |
| 29110  | TBK1     | TANK-binding kinase 1                                                     | 0.68  | CTGACTTGACACGTTTGTA    | NM_013254: | NM_013254:                               |
| 79718  | TBL1XR1  | transducin (beta)-like 1X-linked receptor 1                               | -1.99 | AAGCAAGATAACGGCATATAA  | NM_024665: | NM_024665:                               |
| 79718  | TBL1XR1  | transducin (beta)-like 1X-linked receptor 1                               | 1.67  | ATCACAAATGATCATACTTAA  | NM_024665: | NM_024665:                               |
| 10607  | TBL3     | transducin (beta)-like 3                                                  | -1.69 | CCGGCCGTGACAAAGATATGTA | NM_006453: | NM_006453:                               |
| 10607  | TBL3     | transducin (beta)-like 3                                                  | -1.37 | CCGTATCTGGAGAATGAACAA  | NM_006453: | NM_006453:                               |
| 6908   | TBP      | TATA box binding protein                                                  | 0.63  | TGCCGGAACGCCAAGATATAA  | NM_003194: | NM_003194:                               |
| 6908   | TBP      | TATA box binding protein                                                  | -0.35 | CACCAACAATTTAGTGTAT    | NM_003194: | NM_003194:                               |
| 10716  | TBR1     | T-box, brain, 1                                                           | -1.09 | AAGTCTCGGCTCCACATTAA   | NM_006593: | NM_006593:                               |
| 10716  | TBR1     | T-box, brain, 1                                                           | 0.56  | ATGGCCGTCTGCACGGAATAA  | NM_006593: | NM_006593:                               |
| 30009  | TBX21    | T-box 21                                                                  | 0.48  | AACAATACACGTATGTTATA   | NM_013351: | NM_013351:                               |
| 30009  | TBX21    | T-box 21                                                                  | -5.50 | CCGCCTGGACCCAACTGTCAA  | NM_013351: | NM_013351:                               |
| 6926   | TBX3     | T-box 3 (ulnar mammary syndrome)                                          | -1.67 | CTGCCTATAGAGATATATCCA  | NM_005996: | NM_005996:NM_016569:                     |
| 6926   | TBX3     | T-box 3 (ulnar mammary syndrome)                                          | 0.67  | TCGGGACAAAGTGAACACATTA | NM_005996: | NM_005996:NM_016569:                     |
| 6910   | TBX5     | T-box 5                                                                   | -1.68 | TACCATTGTACCAAGAGGAAA  | NM_000192: | NM_080717:NM_000192:NM_181486:NM_080718: |
| 6910   | TBX5     | T-box 5                                                                   | 1.36  | CCACAAGTACACGCAATATAA  | NM_000192: | NM_080717:NM_000192:NM_181486:NM_080718: |
| 6915   | TBXA2R   | thromboxane A2 receptor                                                   | 0.09  | CCCGCAGATGAGGCTCTGAA   | NM_001060: | NM_001060:NM_201636:                     |
| 6915   | TBXA2R   | thromboxane A2 receptor                                                   | 0.02  | CGGGGTGCTCCTCTGCTGAA   | NM_001060: | NM_001060:NM_201636:                     |
| 6916   | TBXAS1   | thromboxane A synthase 1 (platelet, cytochrome P450, family 5, subfa      | -0.37 | CCGCTGCAGCTAGAATCCAAA  | NM_001061: | NM_003984:NM_001061:                     |
| 6916   | TBXAS1   | thromboxane A synthase 1 (platelet, cytochrome P450, family 5, subfa      | -2.74 | ACCGCTGCAGCTAGAATCCAAA | NM_001061: | NM_003984:NM_001061:                     |
| 6921   | TCEB1    | transcription elongation factor B (SIII), polypeptide 1 (15kDa, elongin C | 1.07  | TGCGAAGCTCTTAGATTTGTTA | NM_005648: | NM_005648:                               |
| 6921   | TCEB1    | transcription elongation factor B (SIII), polypeptide 1 (15kDa, elongin C | 0.03  | TACCTGTAGTTCAAGTAGTAA  | NM_005648: | NM_005648:                               |
| 6923   | TCEB2    | transcription elongation factor B (SIII), polypeptide 2 (18kDa, elongin E | 0.75  | ACACCTTTAATAAACAGTCTA  | NM_007108: | NM_007108:NM_207013:                     |
| 6923   | TCEB2    | transcription elongation factor B (SIII), polypeptide 2 (18kDa, elongin E | -0.16 | TCGGTTTGACAGCATGTTCAA  | NM_007108: | NM_007108:NM_207013:                     |
| 6927   | TCF1     | transcription factor 1, hepatic; LF-B1, hepatic nuclear factor (HNF1), a  | 2.12  | GGGATGGACAGCTTTATTTAA  | NM_000545: | NM_000545:                               |
| 6927   | TCF1     | transcription factor 1, hepatic; LF-B1, hepatic nuclear factor (HNF1), a  | 9.57  | CAGGACAAGCATGGTCCACAA  | NM_000545: | NM_000545:                               |
| 6938   | TCF12    | transcription factor 12 (HTF4, helix-loop-helix transcription factors 4)  | -0.03 | CACCCGTATTTCCCTTATCCTA | NM_003205: | NM_207036:NM_207037:NM_207038:NM_207040: |
| 6938   | TCF12    | transcription factor 12 (HTF4, helix-loop-helix transcription factors 4)  | -0.51 | CAGATTATCTGAAGACACAAA  | NM_003205: | NM_003205:NM_207037:NM_207038:NM_207040: |
| 6939   | TCF15    | transcription factor 15 (basic helix-loop-helix)                          | 0.88  | TGGTTGGTAAGAATCTTAA    | NM_004609: | NM_004609:                               |
| 6939   | TCF15    | transcription factor 15 (basic helix-loop-helix)                          | 0.58  | ATGGTTGGTAAGAATCTTAA   | NM_004609: | NM_004609:                               |
| 6941   | TCF19    | transcription factor 19 (SC1)                                             | -5.71 | CAGCCTAAGGTCCACCCGCAA  | NM_007109: | NM_007109:                               |
| 6941   | TCF19    | transcription factor 19 (SC1)                                             | 1.11  | CCGGCTGCGATTAGCCTAA    | NM_007109: | NM_007109:                               |
| 6928   | TCF2     | transcription factor 2, hepatic; LF-B3; variant hepatic nuclear factor    | 0.28  | TAAGTTATAACTGTGGCTAA   | NM_006481: | NM_006481:                               |
| 6928   | TCF2     | transcription factor 2, hepatic; LF-B3; variant hepatic nuclear factor    | 1.62  | GGGGTGTAAATAGATCCTATA  | NM_006481: | NM_006481:                               |
| 6942   | TCF20    | transcription factor 20 (AR1)                                             | 0.99  | TCCGATGACAAAGTGAATTTA  | NM_005650: | NM_181492:NM_005650:                     |
| 6942   | TCF20    | transcription factor 20 (AR1)                                             | -3.37 | CAGGAGTGCACGTAGAGAAA   | NM_005650: | NM_181492:NM_005650:                     |
| 6943   | TCF21    | transcription factor 21                                                   | 0.70  | ATCTTTCTTTATTTGCTAAA   | NM_003206: | NM_003206:                               |
| 6943   | TCF21    | transcription factor 21                                                   | 0.99  | CAAGTCAATATGTAATTTAA   | NM_003206: | NM_003206:                               |
| 6929   | TCF3     | transcription factor 3 (E2A immunoglobulin enhancer binding factors E     | -0.52 | CCCGATCACTCAAGCAATAA   | NM_003200: | NM_003200:                               |
| 6929   | TCF3     | transcription factor 3 (E2A immunoglobulin enhancer binding factors E     | -1.46 | CCGGCAGATGTGAAAGGTAT   | NM_003200: | NM_003200:                               |
| 6925   | TCF4     | transcription factor 4                                                    | -1.61 | ACGACTTTCTTAAACATATCA  | NM_003199: | NM_003199:                               |
| 6925   | TCF4     | transcription factor 4                                                    | -0.03 | CACGAAATCTTCGAGGACAAA  | NM_003199: | NM_003199:                               |
| 6932   | TCF7     | transcription factor 7 (T-cell specific, HMG-box)                         | -1.92 | CTGGCAGCTTGAGAGGGCAA   | NM_003202: | NM_201634:NM_213648:NM_003202:NM_201632: |
| 6932   | TCF7     | transcription factor 7 (T-cell specific, HMG-box)                         | -0.86 | AACAGAAATATCTGACACTA   | NM_003202: | NM_201634:NM_213648:NM_003202:NM_201632: |
| 83439  | TCF7L1   | transcription factor 7-like 1 (T-cell specific, HMG-box)                  | 0.21  | CCAGCACACTTGCTAATAAAA  | NM_031283: | NM_031283:                               |
| 83439  | TCF7L1   | transcription factor 7-like 1 (T-cell specific, HMG-box)                  | -2.75 | TAGCGTGCTATTGCTCCTGTA  | NM_031283: | NM_031283:                               |
| 6934   | TCF7L2   | transcription factor 7-like 2 (T-cell specific, HMG-box)                  | -0.94 | TGGGCTCACTCCATAGTCAA   | NM_030756: | NM_030756:                               |
| 6934   | TCF7L2   | transcription factor 7-like 2 (T-cell specific, HMG-box)                  | -4.48 | CAGCCGGAGAGACCAATGAA   | NM_030756: | NM_030756:                               |
| 10732  | TCFL5    | transcription factor-like 5 (basic helix-loop-helix)                      | 1.77  | TGGAACAAGTTAAATTTGTTAA | NM_006602: | NM_006602:                               |
| 10732  | TCFL5    | transcription factor-like 5 (basic helix-loop-helix)                      | 0.79  | CTCGCTAGCTGACTCGAAA    | NM_006602: | NM_006602:                               |
| 8115   | TCL1A    | T-cell leukemia/lymphoma 1A                                               | 0.91  | GCCCTTACCATCGAGATAAA   | NM_021966: | NM_021966:                               |
| 8115   | TCL1A    | T-cell leukemia/lymphoma 1A                                               | -2.19 | GCCTTAGTGTACCACATCAA   | NM_021966: | NM_021966:                               |
| 6948   | TCN2     | transcobalamin II; macrocytic anemia                                      | -0.36 | CTGGGAAGCTTTCTGCGCAA   | NM_000355: | NM_000355:                               |
| 6948   | TCN2     | transcobalamin II; macrocytic anemia                                      | 1.09  | TAGGAGGATTCACATATGAAA  | NM_000355: | NM_000355:                               |
| 6949   | TCOF1    | Treacher Collins-Franceschetti syndrome 1                                 | -0.04 | ACGGTTGAAGGTGGAGATCAA  | NM_000356: | NM_000356:NM_001008656:                  |
| 6949   | TCOF1    | Treacher Collins-Franceschetti syndrome 1                                 | 1.92  | CAAGCAGTGAGGAATCAGATA  | NM_000356: | NM_001008657:NM_000356:NM_001008656:     |
| 255394 | TCP11L2  | t-complex 11 (mouse) like 2                                               | -0.15 | ATGGGTAATATTAGCATTACA  | NM_152772: | NM_152772:                               |
| 255394 | TCP11L2  | t-complex 11 (mouse) like 2                                               | -1.20 | CAAGCTAATCTTAGGCTCAA   | NM_152772: | NM_152772:                               |
| 6996   | TDG      | (thymine thymine-DNA glycosylase                                          | 1.14  | AGGACGTATTCTAGTACAGAA  | NM_003211: | NM_003211:NM_001008411:                  |
| 6996   | TDG      | (thymine thymine-DNA glycosylase                                          | 2.04  | TAGGATTTGCTTTGGTATATA  | NM_003211: | NM_003211:NM_001008411:                  |
| 6997   | TDGF1    | teratocarcinoma-derived growth factor 1                                   | 1.87  | TTGAATTATATGTTCAAGATA  | NM_003212: | NM_003212:                               |
| 6997   | TDGF1    | teratocarcinoma-derived growth factor 1                                   | 1.40  | CTGCCTTTCTATACAAAGCTA  | NM_003212: | NM_003212:                               |
| 55775  | TDP1     | tyrosyl-DNA phosphodiesterase 1                                           | 1.36  | CCAGAAGTGTATGAAAGTAAA  | NM_018319: | NM_018319:NM_001008744:                  |
| 55775  | TDP1     | tyrosyl-DNA phosphodiesterase 1                                           | 1.58  | CTGGAGTTAAGCCAAAGTATA  | NM_018319: | NM_018319:NM_001008744:                  |
| 81550  | TDRD3    | tudor domain containing 3                                                 | -1.03 | AAGACGAATAGGACCTATTA   | NM_030794: | NM_030794:                               |
| 81550  | TDRD3    | tudor domain containing 3                                                 | 0.03  | CAGGACAAATACAGATCATCA  | NM_030794: | NM_030794:                               |
| 7006   | TEC      | tec protein tyrosine kinase                                               | 0.80  | CAGTACAAGATCGCAATCAAA  | NM_003215: | NM_003215:                               |
| 7006   | TEC      | tec protein tyrosine kinase                                               | -0.63 | CCGACGTAATCAGAAATCAGA  | NM_003215: | NM_003215:                               |
| 7009   | TEGT     | testis enhanced gene transcript (BAX inhibitor 1)                         | -1.73 | AAGCCGACATGGAGATCAA    | NM_003217: | NM_003217:                               |
| 7009   | TEGT     | testis enhanced gene transcript (BAX inhibitor 1)                         | 1.69  | CTGATTATGTGATCAAGTAA   | NM_003217: | NM_003217:                               |
| 7010   | TEK      | TEK tyrosine kinase, endothelial (venous malformations, multiple cuta     | -0.14 | ACGGCCAGATTGTAAGCTTA   | NM_000459: | NM_000459:                               |
| 7010   | TEK      | TEK tyrosine kinase, endothelial (venous malformations, multiple cuta     | 0.36  | TCGGTGTACTTAAACAACTAA  | NM_000459: | NM_000459:                               |
| 23371  | TENC1    | tensin like C1 domain containing phosphatase (tensin 2)                   | -0.86 | ACAGCACGTGGTCTGACTAAA  | NM_198316: | NM_015319:NM_198316:NM_170754:           |
| 23371  | TENC1    | tensin like C1 domain containing phosphatase (tensin 2)                   | -1.82 | CAAGGTGGCGACGACAGAAA   | NM_198316: | NM_015319:NM_198316:NM_170754:           |
| 132612 | Tenr     | testis nuclear RNA-binding protein                                        | 0.93  | CTGCAATGTTAAGTCGGTTTA  | NM_139243: | NM_139243:                               |
| 132612 | Tenr     | testis nuclear RNA-binding protein                                        | 0.85  | AACAGACCTCATATAGTTTA   | NM_139243: | NM_139243:                               |
| 7015   | TERT     | telomerase reverse transcriptase                                          | -0.36 | CTGGGAATTTGGAGTGACCAA  | NM_003219: | NM_198254:NM_198255:NM_198253:NM_003219: |
| 7015   | TERT     | telomerase reverse transcriptase                                          | 0.03  | CCAGAAGCTTCCCGAGAGAAA  | NM_003219: | NM_198254:NM_198255:NM_198253:NM_003219: |
| 7016   | TESK1    | (testis testis-specific kinase 1                                          | -1.89 | CAGGACCGCCCTGACACAAA   | NM_006285: | NM_006285:                               |
| 7016   | TESK1    | (testis testis-specific kinase 1                                          | 0.03  | CTGGGTACCTGCACTCCAAA   | NM_006285: | NM_006285:                               |
| 10420  | TESK2    | (testis testis-specific kinase 2                                          | 0.61  | CCGGGAAGAATCGTATCTGA   | NM_007170: | NM_007170:                               |
| 10420  | TESK2    | (testis testis-specific kinase 2                                          | 1.18  | CGAGATGACCCCTAATGAA    | NM_007170: | NM_007170:                               |

|        |         |                                                                                                                                                                                                                |        |                        |            |                                                                                  |
|--------|---------|----------------------------------------------------------------------------------------------------------------------------------------------------------------------------------------------------------------|--------|------------------------|------------|----------------------------------------------------------------------------------|
| 56157  | TEX13A  | testis expressed sequence 13A                                                                                                                                                                                  | -0.61  | CCACATCTTATTCTCTGGAA   | NM_031274: | NM_031274:                                                                       |
| 56157  | TEX13A  | testis expressed sequence 13A                                                                                                                                                                                  | -0.23  | CTCCATGGAGACCACAGAGAA  | NM_031274: | NM_031274:                                                                       |
| 7018   | TF      | transferrin                                                                                                                                                                                                    | -0.22  | TGCACTTCCGTAGACCTTAA   | NM_001063: | NM_001063:                                                                       |
| 7018   | TF      | transferrin                                                                                                                                                                                                    | -2.79  | CACCGAAGACTGCATCGCCAA  | NM_001063: | NM_001063:                                                                       |
| 7019   | TFAM    | transcription factor A, mitochondrial                                                                                                                                                                          | -2.17  | AAGATTGAGATGTGTTCACAA  | NM_003201: | NM_003201:                                                                       |
| 7019   | TFAM    | transcription factor A, mitochondrial                                                                                                                                                                          | 1.16   | CACAATAAAGAAACAACGAAA  | NM_003201: | NM_003201:                                                                       |
| 7020   | TFAP2A  | transcription factor AP-2 alpha (activating enhancer binding protein 2)                                                                                                                                        | 0.37   | CACACGGACAACAACGCCAAA  | NM_003220: | NM_003220:NM_001032280:                                                          |
| 7020   | TFAP2A  | transcription factor AP-2 alpha (activating enhancer binding protein 2)                                                                                                                                        | -0.44  | GAGGAAGATCTTTAAGAGAAA  | NM_003220: | NM_003220:NM_001032280:                                                          |
| 7021   | TFAP2B  | transcription factor AP-2 beta (activating enhancer binding protein 2 b)                                                                                                                                       | 0.57   | TGGGAGAAACGTTGGTGTCAA  | NM_003221: | NM_003221:                                                                       |
| 7021   | TFAP2B  | transcription factor AP-2 beta (activating enhancer binding protein 2 b)                                                                                                                                       | 1.50   | TTGAGTTTAGTAATACTGAT   | NM_003221: | NM_003221:                                                                       |
| 7022   | TFAP2C  | transcription factor AP-2 gamma (activating enhancer binding protein 2)                                                                                                                                        | -0.36  | TAGGAACTTGAGAAAACGAA   | NM_003222: | NM_003222:                                                                       |
| 7022   | TFAP2C  | transcription factor AP-2 gamma (activating enhancer binding protein 2)                                                                                                                                        | 0.37   | AGCCCTGATTGCTATAGACAA  | NM_003222: | NM_003222:                                                                       |
| 7023   | TFAP4   | transcription factor AP-4 (activating enhancer binding protein 4)                                                                                                                                              | 0.70   | CAAGGAGAAAGCTATTATATTT | NM_003223: | NM_003223:                                                                       |
| 7023   | TFAP4   | transcription factor AP-4 (activating enhancer binding protein 4)                                                                                                                                              | -3.06  | CCTGGGATTGTCAGCCTCAA   | NM_003223: | NM_003223:                                                                       |
| 7027   | TFDP1   | transcription factor Dp-1                                                                                                                                                                                      | 0.43   | CGGCGCTCTACGATGCCCTTA  | NM_007111: | NM_007111:                                                                       |
| 7029   | TFDP2   | transcription factor Dp-2 (E2F dimerization partner 2)                                                                                                                                                         | 0.96   | AAGCGAGAAATGAACATGAAA  | NM_006286: | NM_006286:                                                                       |
| 7029   | TFDP2   | transcription factor Dp-2 (E2F dimerization partner 2)                                                                                                                                                         | -0.95  | CGCTACTTCTTAAGTACTTAA  | NM_006286: | NM_006286:                                                                       |
| 7030   | TFE3    | transcription factor binding to IGHM enhancer 3                                                                                                                                                                | -3.34  | CAGCTCCGAATTCAGGAACATA | NM_006521: | NM_006521:                                                                       |
| 7030   | TFE3    | transcription factor binding to IGHM enhancer 3                                                                                                                                                                | 0.69   | TCGCAGGCATTCAACATTA    | NM_006521: | NM_006521:                                                                       |
| 7942   | TFEB    | transcription factor EB                                                                                                                                                                                        | -0.22  | AAGCAGGAGCTGCCTAGCGAA  | NM_007162: | NM_007162:                                                                       |
| 7942   | TFEB    | transcription factor EB                                                                                                                                                                                        | -10.78 | CGCCTGGAGATGACCAACAA   | NM_007162: | NM_007162:                                                                       |
| 22797  | TFEC    | transcription factor EC                                                                                                                                                                                        | 0.35   | CGGAGTCCAAATCCACTTAAA  | NM_012252: | NM_012252:NM_001018058:                                                          |
| 22797  | TFEC    | transcription factor EC                                                                                                                                                                                        | -1.79  | ACGGTTGATTTAGGTGCTCAT  | NM_012252: | NM_012252:NM_001018058:                                                          |
| 7031   | TFF1    | trefoil factor 1 (breast cancer, estrogen-inducible sequence expressed)                                                                                                                                        | 0.09   | TCGGCTCACACACACAGATTGA | NM_003225: | NM_003225:                                                                       |
| 7031   | TFF1    | trefoil factor 1 (breast cancer, estrogen-inducible sequence expressed)                                                                                                                                        | -5.40  | CAGCTGTGCTCGGCTCACAA   | NM_003225: | NM_003225:                                                                       |
| 7032   | TFF2    | trefoil factor 2 (spasmolytic protein 1)                                                                                                                                                                       | -0.09  | CACCGGTTGTTCCGAAACCAA  | NM_005423: | NM_005423:                                                                       |
| 7032   | TFF2    | trefoil factor 2 (spasmolytic protein 1)                                                                                                                                                                       | -0.26  | AACATATAATTTCTTAAATA   | NM_005423: | NM_005423:                                                                       |
| 7036   | TFR2    | transferrin receptor 2                                                                                                                                                                                         | 1.38   | TGGAGTTTCAATATCAATAAA  | NM_003227: | NM_003227:                                                                       |
| 7036   | TFR2    | transferrin receptor 2                                                                                                                                                                                         | 1.48   | GACGGTCATCTGCGGTTAA    | NM_003227: | NM_003227:                                                                       |
| 7037   | TFRC    | transferrin receptor (p90, CD71)                                                                                                                                                                               | -0.17  | CCCATTCTGTTGATCAATTA   | NM_003234: | NM_003234:                                                                       |
| 7037   | TFRC    | transferrin receptor (p90, CD71)                                                                                                                                                                               | -1.23  | TCCGTGCTACTCCAGACTAA   | NM_003234: | NM_003234:                                                                       |
| 7038   | TG      | thyroglobulin                                                                                                                                                                                                  | -0.29  | CGGAGAAACGCTTCATGTA    | NM_003235: | NM_003235:                                                                       |
| 7038   | TG      | thyroglobulin                                                                                                                                                                                                  | 0.89   | AGCGTTTGGAGTGAATGTTA   | NM_003235: | NM_003235:                                                                       |
| 7039   | TGFA    | transforming growth factor, alpha                                                                                                                                                                              | 0.48   | CTAGCTTATACATCGTGAAA   | NM_003236: | NM_003236:                                                                       |
| 7039   | TGFA    | transforming growth factor, alpha                                                                                                                                                                              | 0.63   | CTCGTAAAGTATGTTTGAATA  | NM_003236: | NM_003236:                                                                       |
| 7040   | TGFB1   | transforming growth factor, beta 1 (Camurati-Engelmann disease)                                                                                                                                                | -5.29  | CACGTGGAGCTGTACCAGAAA  | NM_000660: | NM_000660:                                                                       |
| 7040   | TGFB1   | transforming growth factor, beta 1 (Camurati-Engelmann disease)                                                                                                                                                | 0.45   | CAGCATATATATGTTCTTCAA  | NM_000660: | NM_000660:                                                                       |
| 7041   | TGFB111 | transforming growth factor beta 1 induced transcript 1                                                                                                                                                         | -0.52  | TCGGTTGCTTCAGGAACCTAA  | NM_015927: | NM_015927:                                                                       |
| 7041   | TGFB111 | transforming growth factor beta 1 induced transcript 1                                                                                                                                                         | -0.65  | ACCGGTGTGAGCTCCACAAA   | NM_015927: | NM_015927:                                                                       |
| 7042   | TGFB2   | transforming growth factor, beta 2                                                                                                                                                                             | -3.44  | AAGCCTTATTCTACATTTCA   | NM_003238: | NM_003238:                                                                       |
| 7042   | TGFB2   | transforming growth factor, beta 2                                                                                                                                                                             | 0.58   | TCCCAAGATTTAGAACCTGTA  | NM_003238: | NM_003238:                                                                       |
| 7043   | TGFB3   | transforming growth factor, beta 3                                                                                                                                                                             | 0.31   | AAGTATGAATTTACTCTCAA   | NM_003239: | NM_003239:                                                                       |
| 7043   | TGFB3   | transforming growth factor, beta 3                                                                                                                                                                             | 0.31   | ACGCATAGACTGAGTATAAAA  | NM_003239: | NM_003239:                                                                       |
| 7045   | TGFB1   | transforming growth factor, beta-induced, 68kDa                                                                                                                                                                | 1.46   | TGGAGAAATGGCATCATTATA  | NM_000358: | NM_000358:                                                                       |
| 7045   | TGFB1   | transforming growth factor, beta-induced, 68kDa                                                                                                                                                                | 0.33   | CGGCACATAATGAGATGTGA   | NM_000358: | NM_000358:                                                                       |
| 7046   | TGFB1   | transforming growth factor, beta-induced, 68kDa                                                                                                                                                                | 0.62   | CTGCTTATTATGATCTTGTA   | NM_004612: | NM_004612:                                                                       |
| 7046   | TGFB1   | transforming growth factor, beta receptor I (activin A receptor type II-III)                                                                                                                                   | -0.43  | TCGATTTGGTGAATTCATGAA  | NM_004612: | NM_004612:                                                                       |
| 7048   | TGFB2   | transforming growth factor, beta receptor II (70/80kDa)                                                                                                                                                        | -0.06  | TCCCAATATCTCGTGAAGAA   | NM_003242: | NM_003242:NM_001024847:                                                          |
| 7048   | TGFB2   | transforming growth factor, beta receptor II (70/80kDa)                                                                                                                                                        | -0.57  | TCGCTTGTGAGGTCTATATA   | NM_003242: | NM_003242:NM_001024847:                                                          |
| 7049   | TGFB3   | (trav) transforming growth factor, beta receptor III (betaglycan, 300kDa)                                                                                                                                      | 0.00   | ACCGTAAATCGTGGTGTTTAA  | NM_003243: | NM_003243:                                                                       |
| 7049   | TGFB3   | (trav) transforming growth factor, beta receptor III (betaglycan, 300kDa)                                                                                                                                      | -5.67  | CCCGCAAGCTGACATGGATAA  | NM_003243: | NM_003243:                                                                       |
| 9392   | TGFB1   | transforming growth factor, beta receptor associated protein 1                                                                                                                                                 | -0.58  | CACAGAGGTAGCAAAATGGCTA | NM_004257: | NM_004257:                                                                       |
| 9392   | TGFB1   | transforming growth factor, beta receptor associated protein 1                                                                                                                                                 | -2.65  | CACCCACTAGCTGTGCTGTA   | NM_004257: | NM_004257:                                                                       |
| 7050   | TGIF    | TGFB-induced factor (TALE family homeobox)                                                                                                                                                                     | 0.70   | CACATACTGCTAATTAATAA   | NM_003244: | NM_173208:NM_173209:NM_173210:NM_173211:NM_003244:NM_173207:NM_170695:NM_174886: |
| 7050   | TGIF    | TGFB-induced factor (TALE family homeobox)                                                                                                                                                                     | 0.92   | TCCAAGAACTATAAACTTAAA  | NM_003244: | NM_173208:NM_173209:NM_173210:NM_173211:NM_003244:NM_173207:NM_170695:NM_174886: |
| 7051   | TGM1    | transglutaminase 1 (K polypeptide epidermal type I, protein-glutamine transglutaminase 1 (K polypeptide epidermal type I, protein-glutamine transglutaminase 2 (C polypeptide, protein-glutamine-gamma-glutamy | -0.46  | CGCCCGCACAGTGAACACTGCA | NM_000359: | NM_000359:                                                                       |
| 7051   | TGM1    | transglutaminase 1 (K polypeptide epidermal type I, protein-glutamine transglutaminase 2 (C polypeptide, protein-glutamine-gamma-glutamy                                                                       | 1.50   | TGGCAGCTTCAAGATTGTTTA  | NM_000359: | NM_000359:                                                                       |
| 7052   | TGM2    | transglutaminase 2 (C polypeptide, protein-glutamine-gamma-glutamy                                                                                                                                             | -5.08  | CGCGTGTGACCAACTACAA    | NM_004613: | NM_198951:NM_004613:                                                             |
| 7052   | TGM2    | transglutaminase 2 (C polypeptide, protein-glutamine-gamma-glutamy                                                                                                                                             | -0.27  | CGCAAGGAGCAAACTGAA     | NM_004613: | NM_004613:                                                                       |
| 7053   | TGM3    | transglutaminase 3 (E polypeptide, protein-glutamine-gamma-glutamy                                                                                                                                             | -0.84  | AACGGCACGCTGTACATGAA   | NM_003245: | NM_003245:                                                                       |
| 7053   | TGM3    | transglutaminase 3 (E polypeptide, protein-glutamine-gamma-glutamy                                                                                                                                             | 0.42   | TCGCATGGACCTCACGGACAA  | NM_003245: | NM_003245:                                                                       |
| 7047   | TGM4    | transglutaminase 4 (prostate)                                                                                                                                                                                  | 0.00   | CAGGGCCACCATTGCTCAAT   | NM_003241: | NM_003241:                                                                       |
| 7047   | TGM4    | transglutaminase 4 (prostate)                                                                                                                                                                                  | 0.00   | ACCCAAGAAATTTATCGTCAA  | NM_003241: | NM_003241:                                                                       |
| 9333   | TGM5    | transglutaminase 5                                                                                                                                                                                             | 0.74   | CAGATCCAAGCTAATATGAGA  | NM_004245: | NM_004245:NM_201631:                                                             |
| 9333   | TGM5    | transglutaminase 5                                                                                                                                                                                             | -2.46  | CTCCAGTTCAAGACCTCAA    | NM_004245: | NM_004245:NM_201631:                                                             |
| 343641 | TGM6    | transglutaminase 6                                                                                                                                                                                             | 0.35   | GCCGGGAGCGTGTACTACTCAA | NM_198994: | NM_198994:                                                                       |
| 343641 | TGM6    | transglutaminase 6                                                                                                                                                                                             | -0.05  | ACGGGTGCTGTCACACTTCAA  | NM_198994: | NM_198994:                                                                       |
| 116179 | TGM7    | transglutaminase 7                                                                                                                                                                                             | -1.43  | CGCGCACACCTGGATAGGAA   | NM_052955: | NM_052955:                                                                       |
| 116179 | TGM7    | transglutaminase 7                                                                                                                                                                                             | 0.69   | CAAGAGCCTGTATCACTTAAA  | NM_052955: | NM_052955:                                                                       |
| 7054   | TH      | tyrosine hydroxylase                                                                                                                                                                                           | 0.52   | CCCAATCACCGTCAACAATAA  | NM_000360: | NM_000360:NM_199293:NM_199292:                                                   |
| 7054   | TH      | tyrosine hydroxylase                                                                                                                                                                                           | -1.22  | CTCCGTGAAGTTCGACCCGTA  | NM_000360: | NM_000360:NM_199293:NM_199292:                                                   |
| 7056   | THBD    | thrombospondin                                                                                                                                                                                                 | 0.70   | ATGATTCATGCAATTAGCAA   | NM_000361: | NM_000361:                                                                       |
| 7056   | THBD    | thrombospondin                                                                                                                                                                                                 | -0.17  | CTGCATGATTCATGCCAATTA  | NM_000361: | NM_000361:                                                                       |
| 7057   | THBS1   | thrombospondin 1                                                                                                                                                                                               | -0.33  | TACGAATGTAGAGATCCCTAA  | NM_003246: | NM_003246:                                                                       |
| 7057   | THBS1   | thrombospondin 1                                                                                                                                                                                               | 0.37   | TAGCTGATTAACCCATGATAA  | NM_003246: | NM_003246:                                                                       |
| 7058   | THBS2   | thrombospondin 2                                                                                                                                                                                               | -0.08  | AGCGTTGGGACTTCAATTA    | NM_003247: | NM_003247:                                                                       |
| 7058   | THBS2   | thrombospondin 2                                                                                                                                                                                               | 0.02   | CAAGAGAGTGTGCAATGATAA  | NM_003247: | NM_003247:                                                                       |
| 7059   | THBS3   | thrombospondin 3                                                                                                                                                                                               | -0.47  | ATCGATGGTACCAGACCAA    | NM_007112: | NM_007112:                                                                       |
| 7059   | THBS3   | thrombospondin 3                                                                                                                                                                                               | 0.11   | CTGCATGGAAGTGTACGAGTA  | NM_007112: | NM_007112:                                                                       |
| 7060   | THBS4   | thrombospondin 4                                                                                                                                                                                               | 1.15   | CTGACATTTGATGAGTGTGCAA | NM_003248: | NM_003248:                                                                       |
| 7060   | THBS4   | thrombospondin 4                                                                                                                                                                                               | 2.11   | TTGACCCGCTTCGATAATTA   | NM_003248: | NM_003248:                                                                       |
| 117145 | THEM4   | thioesterase superfamily member 4                                                                                                                                                                              | 2.02   | AGCCCACTTGATAAAGTTGAA  | NM_053055: | NM_053055:NM_176853:                                                             |
| 117145 | THEM4   | thioesterase superfamily member 4                                                                                                                                                                              | 1.50   | CAGAGGCGCAACGCTTATTTA  | NM_053055: | NM_053055:NM_176853:                                                             |
| 7064   | THOP1   | thimet oligopeptidase 1                                                                                                                                                                                        | -0.75  | CAGCAAGTGGCATGGATTA    | NM_003249: | NM_003249:                                                                       |
| 7064   | THOP1   | thimet oligopeptidase 1                                                                                                                                                                                        | -2.45  | CAAGTCTTACTGTGACCTGTA  | NM_003249: | NM_003249:                                                                       |
| 7066   | THPO    | thrombopoietin (myeloproliferative leukemia virus oncogene ligand, m                                                                                                                                           | -0.12  | CAGATCTTACTTGTGAGAAA   | NM_000460: | NM_199356:NM_199228:NM_000460:                                                   |
| 7066   | THPO    | thrombopoietin (myeloproliferative leukemia virus oncogene ligand, m                                                                                                                                           | -1.52  | CCGGATACCTGAAACAGGATA  | NM_000460: | NM_199356:NM_199228:NM_000460:                                                   |
| 7067   | THRA    | thyroid hormone receptor, alpha (erythroblastic leukemia viral (v-erb-a                                                                                                                                        | -2.66  | CCCGATGACATTGGCCAGTCA  | NM_003250: | NM_199334:NM_003250:                                                             |
| 7067   | THRA    | thyroid hormone receptor, alpha (erythroblastic leukemia viral (v-erb-a                                                                                                                                        | -1.37  | CTGGATGGAATTTGAAGTGAAT | NM_003250: | NM_199334:NM_003250:                                                             |
| 9969   | THRAP1  | thyroid hormone receptor associated protein 1                                                                                                                                                                  | -2.95  | ACGGTGTAAATGAACAGGAA   | NM_005121: | NM_005121:                                                                       |
| 9969   | THRAP1  | thyroid hormone receptor associated protein 1                                                                                                                                                                  | 0.31   | CCCAGTCATGTTAAATGAATA  | NM_005121: | NM_005121:                                                                       |
| 23389  | THRAP2  | thyroid hormone receptor associated protein 2                                                                                                                                                                  | 0.71   | ATGGCTTAAATGGACGCTAA   | NM_015335: | NM_015335:                                                                       |
| 23389  | THRAP2  | thyroid hormone receptor associated protein 2                                                                                                                                                                  | -1.09  | CAGCCTATTGATACCACCTAA  | NM_015335: | NM_015335:                                                                       |
| 9967   | THRAP3  | thyroid hormone receptor associated protein 3                                                                                                                                                                  | -1.05  | CGCAAGCTTTGCGGAGATCTA  | NM_005119: | NM_005119:                                                                       |
| 9967   | THRAP3  | thyroid hormone receptor associated protein 3                                                                                                                                                                  | -0.21  | AACGGTTACTAAATACCTAA   | NM_005119: | NM_005119:                                                                       |

|        |                |                                                                         |       |                        |            |                                                |
|--------|----------------|-------------------------------------------------------------------------|-------|------------------------|------------|------------------------------------------------|
| 9862   | THRAP4         | thyroid hormone receptor associated protein 4                           | -0.02 | ATCGAGCATTCTCTTGAAA    | NM_014815: | NM_014815:                                     |
| 9862   | THRAP4         | thyroid hormone receptor associated protein 4                           | -1.15 | CGGCGTCTAGTGGTCTGCAA   | NM_014815: | NM_014815:                                     |
| 10025  | THRAP5         | thyroid hormone receptor associated protein 5                           | -0.18 | CACGTGCGACCCAGTAGTGA   | NM_005481: | NM_005481:                                     |
| 10025  | THRAP5         | thyroid hormone receptor associated protein 5                           | 1.15  | TGGGAAGACAGGTCCAATAA   | NM_005481: | NM_005481:                                     |
| 90390  | THRAP6         | thyroid hormone receptor associated protein 6                           | -1.80 | CAGGAAGCTGAGATGGTATA   | NM_080651: | NM_080651:                                     |
| 90390  | THRAP6         | thyroid hormone receptor associated protein 6                           | -1.92 | CTGAGATTGGTATATGACAAA  | NM_080651: | NM_080651:                                     |
| 7068   | THRB           | thyroid hormone receptor, beta (erythroblastic leukemia viral (v-erb-a) | 0.12  | AAGTGAGACTTAAACCTTGAA  | NM_000461: | NM_000461:                                     |
| 7068   | THRB           | thyroid hormone receptor, beta (erythroblastic leukemia viral (v-erb-a) | 1.95  | TCGAGAATGTTACTAACCTA   | NM_000461: | NM_000461:                                     |
| 7068   | THRB           | thyroid hormone receptor, beta (erythroblastic leukemia viral (v-erb-a) | 0.19  | ACGAAATTCATTGGCAGATTA  | XM_379184: | NM_000461:                                     |
| 7068   | THRB           | thyroid hormone receptor, beta (erythroblastic leukemia viral (v-erb-a) | -2.77 | TAGATATTTATTATCCAGGTA  | XM_379184: | NM_000461:                                     |
| 80745  | THUMP2         | THUMP domain containing 2                                               | 0.46  | TGCGTTCATATGAAATATAA   | NM_025264: | NM_025264:                                     |
| 80745  | THUMP2         | THUMP domain containing 2                                               | -0.03 | CAGGCGCCTTACAGATGTGAA  | NM_025264: | NM_025264:                                     |
| 7072   | TIA1 (TIA1 cy  | TIA1 cytotoxic granule-associated RNA binding protein                   | -0.14 | AACGATTTGGGAGGTAGTGAA  | NM_022173: | NM_022173;NM_022037:                           |
| 7072   | TIA1 (TIA1 cy  | TIA1 cytotoxic granule-associated RNA binding protein                   | -1.19 | CTGGGCTAACAGAACTAA     | NM_022173: | NM_022173;NM_022037:                           |
| 9220   | TIAF1          | TGFB1-induced anti-apoptotic factor 1                                   | 0.15  | AGGAGTGTCTTTGTCCCTAA   | NM_004740: | NM_004740:                                     |
| 9220   | TIAF1          | TGFB1-induced anti-apoptotic factor 1                                   | 0.70  | TCCTTTACTCCGGTGCTTAA   | NM_005468: | NM_004740:                                     |
| 7073   | TIAL1          | TIA1 cytotoxic granule-associated RNA binding protein-like 1            | 0.41  | ATCGGATGCCCGGTAGTTAA   | NM_022333: | NM_022333;NM_001033925:                        |
| 7073   | TIAL1          | TIA1 cytotoxic granule-associated RNA binding protein-like 1            | 0.60  | TCCTAGGTGACTATAGCTAA   | NM_022333: | NM_001033925;NM_003252:                        |
| 7074   | TIAM1 (T-cell  | T-cell lymphoma invasion and metastasis 1                               | -0.28 | ACGGCGAGCTTAAAGAAAGAA  | NM_003253: | NM_003253:                                     |
| 7074   | TIAM1 (T-cell  | T-cell lymphoma invasion and metastasis 1                               | -3.02 | CTGGTTCTGTCTGCCAATAA   | NM_003253: | NM_003253:                                     |
| 148022 | TICAM1         | tol-like receptor adaptor molecule 1                                    | -1.41 | ATCATCGGACAGAAAATCTTA  | NM_014261: | NM_014261;NM_182919:                           |
| 148022 | TICAM1         | tol-like receptor adaptor molecule 1                                    | 0.68  | CTCCAGATCTTCCGCGAGGAA  | NM_014261: | NM_014261;NM_182919:                           |
| 353376 | TICAM2         | tol-like receptor adaptor molecule 2                                    | -0.77 | TTGCCTGAGATGAAACATATA  | NM_021649: | NM_021649:                                     |
| 353376 | TICAM2         | tol-like receptor adaptor molecule 2                                    | 0.75  | TCGGGTACTATCACCCAGAAA  | NM_021649: | NM_021649:                                     |
| 7075   | TIE1           | tyrosine kinase with immunoglobulin-like and EGF-like domains 1         | 2.13  | CCGAGTGAGAACGTCGACGTTA | NM_005424: | NM_005424:                                     |
| 7075   | TIE1           | tyrosine kinase with immunoglobulin-like and EGF-like domains 1         | 1.55  | CGCGTTCAGGTCATGTA      | NM_005424: | NM_005424:                                     |
| 91937  | TIMD4          | T-cell immunoglobulin and mucin domain containing 4                     | -0.19 | AGGGAACCTCATGGAACCTTA  | NM_138379: | NM_138379:                                     |
| 91937  | TIMD4          | T-cell immunoglobulin and mucin domain containing 4                     | -0.14 | ATGGAATGAGGGTACCTCAA   | NM_138379: | NM_138379:                                     |
| 1678   | TIMM8A         | translocase of inner mitochondrial membrane 8 homolog A (yeast)         | -2.22 | CAGGTAGAGGTGCATCCCTAA  | NM_004085: | NM_004085:                                     |
| 1678   | TIMM8A         | translocase of inner mitochondrial membrane 8 homolog A (yeast)         | -0.01 | CTAGAGGCCCTTAGTTATAAA  | NM_004085: | NM_004085:                                     |
| 7076   | TIMP1          | TIMP metalloproteinase inhibitor 1                                      | 0.77  | AAGATGTATAAAGGGTCCAA   | NM_003254: | NM_003254:                                     |
| 7076   | TIMP1          | TIMP metalloproteinase inhibitor 1                                      | -0.82 | TCCCATCTTCTCCGGACAA    | NM_003254: | NM_003254:                                     |
| 7077   | TIMP2          | TIMP metalloproteinase inhibitor 2                                      | -2.39 | CTCGACATCGAGGACCCATAA  | NM_003255: | NM_003255:                                     |
| 7077   | TIMP2          | TIMP metalloproteinase inhibitor 2                                      | -2.38 | CTCGGTGACGTTGGAGGAAA   | NM_003255: | NM_003255:                                     |
| 7078   | TIMP3          | TIMP metalloproteinase inhibitor 3 (Sorsby fundus dystrophy, pseudoin   | -0.03 | CACGCTGGTCTACACCATCAA  | NM_000362: | NM_000362:                                     |
| 7078   | TIMP3          | TIMP metalloproteinase inhibitor 3 (Sorsby fundus dystrophy, pseudoin   | 0.22  | CGGCGGCAATTTCCCTATAA   | NM_000362: | NM_000362:                                     |
| 7079   | TIMP4 (TIMP    | TIMP metalloproteinase inhibitor 4                                      | 0.97  | AGGATGTTTCAGTATATCTATA | NM_003256: | NM_003256:                                     |
| 7079   | TIMP4 (TIMP    | TIMP metalloproteinase inhibitor 4                                      | 0.03  | CGGTATGAATCAAAACAGATA  | NM_003256: | NM_003256:                                     |
| 27283  | TINAG          | tubulointerstitial nephritis antigen                                    | 0.27  | TAAGGTCATGCCTTTAAGTAA  | NM_014464: | NM_014464:                                     |
| 27283  | TINAG          | tubulointerstitial nephritis antigen                                    | 0.35  | ATGAACCAATCAATCATATA   | NM_014464: | NM_014464:                                     |
| 64129  | TINAGL1        | tubulointerstitial nephritis antigen-like 1                             | 0.49  | CAGCCCTGTATCTTCTTATCTT | NM_022164: | NM_022164:                                     |
| 64129  | TINAGL1        | tubulointerstitial nephritis antigen-like 1                             | -7.98 | CGGCGTGGGATCCAGGCTAA   | NM_022164: | NM_022164:                                     |
| 114609 | TIRAP          | tol-interleukin 1 receptor (TIR) domain containing adaptor protein      | 1.05  | TACACTGGTATCCCTCTCAA   | NM_052887: | NM_052887:                                     |
| 114609 | TIRAP          | tol-interleukin 1 receptor (TIR) domain containing adaptor protein      | 0.42  | CGGAAATGGAGTGAAGCTA    | NM_052887: | NM_052887:                                     |
| 7080   | TITF1          | thyroid transcription factor 1                                          | -2.89 | CTCGTTACGTTGATCATCCAA  | NM_003317: | NM_003317:                                     |
| 7080   | TITF1          | thyroid transcription factor 1                                          | -3.67 | TACCTTGTCATCAGCATGTAA  | NM_003317: | NM_003317:                                     |
| 7082   | TJP1           | tight junction protein 1 (zona occludens 1)                             | 0.08  | AAGGTCAAAGGCAAAATAAA   | NM_003257: | NM_003257;NM_175610:                           |
| 7082   | TJP1           | tight junction protein 1 (zona occludens 1)                             | 1.09  | CTGGATTAACCTTAATCTAAA  | NM_003257: | NM_003257;NM_175610:                           |
| 7083   | TK1            | thymidine kinase 1, soluble                                             | -0.76 | CGGGAAGCCGCTATACCCAA   | NM_003258: | NM_003258:                                     |
| 7083   | TK1            | thymidine kinase 1, soluble                                             | -0.30 | CGGCGCGATGTTCTCAGGAAA  | NM_003258: | NM_003258:                                     |
| 7084   | TK2 (thymidin  | thymidine kinase 2, mitochondrial                                       | -4.29 | ATGCCAGAAGTGGACTATGTA  | NM_004614: | NM_004614:                                     |
| 7084   | TK2 (thymidin  | thymidine kinase 2, mitochondrial                                       | -0.36 | CGGGATCGAATATTAACCTCA  | NM_004614: | NM_004614:                                     |
| 7086   | TKT            | transketolase (Wernicke-Korsakoff syndrome)                             | 0.34  | ACCGTGGAGACCATTTATTAT  | NM_001064: | NM_001064:                                     |
| 7086   | TKT            | transketolase (Wernicke-Korsakoff syndrome)                             | -0.11 | CAAGGTGGTCTCGAAGGCAAA  | NM_001064: | NM_001064:                                     |
| 8277   | TKTL1          | transketolase-like 1                                                    | -0.26 | AAGTGTTCCTCTCGAATAA    | NM_012253: | NM_012253:                                     |
| 8277   | TKTL1          | transketolase-like 1                                                    | 1.91  | CGGATCATTCACAGTGAGGA   | NM_012253: | NM_012253:                                     |
| 9874   | TLK1           | tousled-like kinase 1                                                   | -1.23 | CAGAGATATAGAAATACACAA  | NM_012290: | NM_012290:                                     |
| 9874   | TLK1           | tousled-like kinase 1                                                   | -0.38 | CGGAGAGAAACAATCGGAA    | NM_012290: | NM_012290:                                     |
| 11011  | TLK2           | tousled-like kinase 2                                                   | -3.92 | AAGTTCATCTGCTCATGCAA   | NM_006852: | NM_006852:                                     |
| 11011  | TLK2           | tousled-like kinase 2                                                   | 1.01  | CAAGAGAATACGATTTTAA    | NM_006852: | NM_006852:                                     |
| 7092   | TLI1           | tolloid-like 1                                                          | 1.42  | CAGCATTACAAGGATATTTGA  | NM_012464: | NM_012464:                                     |
| 7092   | TLI1           | tolloid-like 1                                                          | -1.75 | TAGAATCAATCTCGACCTATA  | NM_012464: | NM_012464:                                     |
| 7093   | TLI2           | tolloid-like 2                                                          | -0.34 | CAGAGAATTTGCTTAGGACAA  | NM_012465: | NM_012465:                                     |
| 7093   | TLI2           | tolloid-like 2                                                          | 0.11  | CACCTCAAGGTATAATTTAA   | NM_012465: | NM_012465:                                     |
| 7094   | TLN1           | talín 1                                                                 | -1.35 | CAGCTCGAGATGGCAAGCTTA  | NM_006289: | NM_006289:                                     |
| 7094   | TLN1           | talín 1                                                                 | 1.04  | CGCCATGGCATCACCAATCA   | NM_006289: | NM_006289:                                     |
| 83660  | TLN2           | talín 2                                                                 | -1.34 | CTGCATGATCGTATGTCACA   | NM_015059: | NM_015059:                                     |
| 83660  | TLN2           | talín 2                                                                 | 0.05  | CAGATGTTGATGCAGCCAAA   | NM_015059: | NM_015059:                                     |
| 7095   | TLOC1          | translocation protein 1                                                 | 0.44  | TGGAGTTACTACTAATAA     | NM_003262: | NM_003262:                                     |
| 7095   | TLOC1          | translocation protein 1                                                 | 0.42  | CAGTTTCTTAAAGATGTGTA   | NM_003262: | NM_003262:                                     |
| 7096   | TLR1           | tol-like receptor 1                                                     | -0.52 | CAGGCTTCTCATGAACACTAA  | NM_003263: | NM_003263:                                     |
| 7096   | TLR1           | tol-like receptor 1                                                     | -0.42 | CGGCAAGTTATATCTATGAA   | NM_003263: | NM_003263:                                     |
| 81793  | TLR10          | tol-like receptor 10                                                    | 1.19  | TCGGTCTTATGCTTAATAA    | NM_030956: | NM_030956;NM_001017388:                        |
| 81793  | TLR10          | tol-like receptor 10                                                    | -0.39 | CGGTTGACCTGTGAATTTAA   | NM_030956: | NM_030956;NM_001017388:                        |
| 7097   | TLR2           | tol-like receptor 2                                                     | -0.46 | CGGCACTCAAAGAACTTTAT   | NM_003264: | NM_003264:                                     |
| 7097   | TLR2           | tol-like receptor 2                                                     | -0.33 | CAGGTAAAGTGGAAACGTTAA  | NM_003264: | NM_003264:                                     |
| 7098   | TLR3           | tol-like receptor 3                                                     | -2.46 | CTGGATATCTTCCCAATTTCA  | NM_003265: | NM_003265:                                     |
| 7098   | TLR3           | tol-like receptor 3                                                     | -0.19 | CAGCACATGAGCATCTCCAA   | NM_003265: | NM_003265:                                     |
| 7099   | TLR4           | tol-like receptor 4                                                     | 1.40  | CTCGATGATATTTAGCTATA   | NM_003266: | NM_138557;NM_138554;NM_138556;NM_003266:       |
| 7099   | TLR4           | tol-like receptor 4                                                     | 0.44  | CTCGATGATATTTAGCTATA   | NM_003266: | NM_138554;NM_138556;NM_003266:                 |
| 7100   | TLR5           | tol-like receptor 5                                                     | -4.38 | CAGGTGCTTATCTGACCTTAA  | NM_003268: | NM_003268:                                     |
| 7100   | TLR5           | tol-like receptor 5                                                     | -1.69 | GAGGACCTTCTCATCTTCAA   | NM_003268: | NM_003268:                                     |
| 10333  | TLR6 (tol-like | tol-like receptor 6                                                     | 0.74  | CCAAGTGAACATACAGTTAA   | NM_006068: | NM_006068:                                     |
| 10333  | TLR6 (tol-like | tol-like receptor 6                                                     | 0.06  | CAGAGGTCAACCTTACTGAA   | NM_006068: | NM_006068:                                     |
| 51284  | TLR7 (tol-like | tol-like receptor 7                                                     | 0.88  | CAGCATGTTTAAACAATTTAA  | NM_016562: | NM_016562:                                     |
| 51284  | TLR7 (tol-like | tol-like receptor 7                                                     | 0.07  | CAGACCTTGGATCTAAGTAAA  | NM_016562: | NM_016562:                                     |
| 51311  | TLR8           | tol-like receptor 8                                                     | -2.88 | TCGCGCCATAAAGATGCA     | NM_016610: | NM_138636;NM_016610:                           |
| 51311  | TLR8           | tol-like receptor 8                                                     | 0.03  | CCCAAATGAAGCATCTCTTAA  | NM_016610: | NM_138636;NM_016610:                           |
| 54106  | TLR9           | tol-like receptor 9                                                     | 1.06  | CACCTCAATAAAGTCTACCGAA | NM_017442: | NM_017442;NM_138688:                           |
| 54106  | TLR9           | tol-like receptor 9                                                     | -0.39 | CGGCAACTGTTATTTACAAGAA | NM_017442: | NM_017442;NM_138688:                           |
| 83941  | TM2D1          | TM2 domain containing 1                                                 | 2.47  | ACGCAATATATCCATAAATA   | NM_032027: | NM_032027:                                     |
| 83941  | TM2D1          | TM2 domain containing 1                                                 | 1.96  | AAGTAGTTACATTAATAGATTA | NM_032027: | NM_032027:                                     |
| 83877  | TM2D2          | TM2 domain containing 2                                                 | -0.08 | TGGATTGTAATACACTGAA    | NM_031940: | NM_078473;NM_031940;NM_001024380;NM_001024381: |
| 83877  | TM2D2          | TM2 domain containing 2                                                 | -0.23 | CACACTTCATAACCACTTTA   | NM_031940: | NM_078473;NM_031940;NM_001024380;NM_001024381: |
| 80213  | TM2D3          | TM2 domain containing 3                                                 | 0.68  | CAGAAATGTTTATGTCTAGTTA | NM_025141: | NM_025141;NM_078474:                           |
| 80213  | TM2D3          | TM2 domain containing 3                                                 | -1.62 | CTGAACATGCTAATCTGGAA   | NM_025141: | NM_025141;NM_078474:                           |

|        |                                                                                 |        |                        |            |                                          |
|--------|---------------------------------------------------------------------------------|--------|------------------------|------------|------------------------------------------|
| 51768  | TM7SF3 (transtransmembrane 7 superfamily member 3                               | 1.66   | CAGTATGATGCTATCAGTAT   | NM_016551: | NM_016551:                               |
| 51768  | TM7SF3 (transtransmembrane 7 superfamily member 3                               | 0.94   | TCGGAGGGAGTTTATTATTGA  | NM_016551: | NM_016551:                               |
| 81501  | TM7SF4 transmembrane 7 superfamily member 4                                     | 1.58   | TCAGCATAGAAATATGTTCAA  | NM_030788: | NM_030788:                               |
| 81501  | TM7SF4 transmembrane 7 superfamily member 4                                     | -0.33  | ATGCCGGATAATAGAGAAGCTA | NM_030788: | NM_030788:                               |
| 79838  | TM05 transmembrane channel-like 5                                               | 0.68   | CGCGATTATTGCTAAATGGAA  | NM_024780: | NM_024780:                               |
| 79838  | TM05 transmembrane channel-like 5                                               | -0.11  | CAGGAATGATTGGTCTTAGA   | NM_024780: | NM_024780:                               |
| 55002  | TM003 transmembrane and coiled-coil domains 3                                   | 0.51   | TAGTCAAATATTTGTATTAA   | NM_017905: | NM_017905:                               |
| 55002  | TM003 transmembrane and coiled-coil domains 3                                   | -1.95  | GAGGAGCAGCCAGTACATCAA  | NM_017905: | NM_017905:                               |
| 11018  | TMED1 transmembrane emp24 protein transport domain containing 1                 | -0.17  | CTGGGCATTGGAGTCAATAAAA | NM_006858: | NM_006858:                               |
| 11018  | TMED1 transmembrane emp24 protein transport domain containing 1                 | -3.97  | CCGGCCAAAGCTAGGCAGAAA  | NM_006858: | NM_006858:                               |
| 7109   | TMEM1 transmembrane protein 1                                                   | 1.62   | ACCATTGTATTAAGACTTTAA  | NM_003274: | NM_003274:                               |
| 7109   | TMEM1 transmembrane protein 1                                                   | -0.03  | AGCCGTACTACTTGAATTTAA  | NM_003274: | NM_003274:                               |
| 66000  | TMEM108 transmembrane protein 108                                               | -0.29  | CCCTCTATTGCCAAGCTTTAA  | NM_023943: | NM_023943:                               |
| 66000  | TMEM108 transmembrane protein 108                                               | -1.09  | CACCTGGGATGGCTCTGTAA   | NM_023943: | NM_023943:                               |
| 8834   | TMEM11 transmembrane protein 11                                                 | -0.46  | CCCGTGGTCTGGTCCGGAAA   | NM_003876: | NM_003876:                               |
| 8834   | TMEM11 transmembrane protein 11                                                 | -1.36  | CCGTGATTTTCAAGTAAACA   | NM_003876: | NM_003876:                               |
| 89894  | TMEM116 transmembrane protein 116                                               | 0.01   | CACCGTCAATTCATCTGGTA   | NM_138341: | NM_138341:                               |
| 89894  | TMEM116 transmembrane protein 116                                               | -0.04  | ATGGCTACTCTGAGTGTATA   | NM_138341: | NM_138341:                               |
| 338440 | TMEM16J transmembrane protein 16J                                               | -0.45  | CGGGAGCAGCCAGTTGATGAA  | NM_374860: | NM_001012302:                            |
| 338440 | TMEM16J transmembrane protein 16J                                               | -0.16  | GACCATCATCATGACCAAA    | XM_374860: | NM_001012302:                            |
| 27112  | TMEM28 transmembrane protein 28                                                 | -1.73  | CTCGTGTGCATAAATCTTAA   | NM_015686: | NM_015686:                               |
| 27112  | TMEM28 transmembrane protein 28                                                 | -0.63  | TCCAGACATGCTTATGTATA   | NM_015686: | NM_015686:                               |
| 55754  | TMEM30A transmembrane protein 30A                                               | 0.81   | AACGATTAAAGGTACAAACA   | NM_018247: | NM_018247:                               |
| 55754  | TMEM30A transmembrane protein 30A                                               | 0.81   | CTCGAGATGATGTAACACTAA  | NM_018247: | NM_018247:                               |
| 757    | TMEM50B transmembrane protein 50B                                               | -2.22  | ATGGAGTAGATTGTACACTAA  | NM_006134: | NM_006134:                               |
| 757    | TMEM50B transmembrane protein 50B                                               | -0.59  | AAGCTGGGATACAGCATTAA   | NM_006134: | NM_006134:                               |
| 255043 | TMEM86E transmembrane protein 86E                                               | -0.66  | CGCGGTTAATGACAGCAGAAA  | NM_173804: | NM_173804:                               |
| 255043 | TMEM86E transmembrane protein 86E                                               | -0.58  | TGCGGTTAATGACAGCAGAAA  | NM_173804: | NM_173804:                               |
| 25963  | TMEM87A transmembrane protein 87A                                               | 1.24   | CTGGCTTAATTTAAACAGTAA  | NM_015497: | NM_015497:                               |
| 25963  | TMEM87A transmembrane protein 87A                                               | -0.60  | AGCGTGTATTGTTACAATGAA  | NM_015497: | NM_015497:                               |
| 84910  | TMEM87B transmembrane protein 87B                                               | 0.01   | CCGTATAAGAAATGTAGTTAA  | NM_032824: | NM_032824:                               |
| 84910  | TMEM87B transmembrane protein 87B                                               | 0.17   | AAGATGGGTTTCATATCTTTA  | NM_032824: | NM_032824:                               |
| 56937  | TMEPAI transmembrane, prostate androgen induced RNA                             | 0.30   | CACGGATCAATCTCAGCTTAA  | NM_020182: | NM_199169;NM_020182;NM_199170;NM_199171: |
| 56937  | TMEPAI transmembrane, prostate androgen induced RNA                             | 0.33   | CGCACTGTAAGATGATTTAA   | NM_020182: | NM_199169;NM_020182;NM_199170;NM_199171: |
| 339967 | TMPRSS11A transmembrane protease, serine 11A                                    | -0.04  | TAGAGTGATTAGTTAATCAAA  | NM_182606: | NM_182606:                               |
| 339967 | TMPRSS11A transmembrane protease, serine 11A                                    | -1.48  | CACAACGTAAGTTATTTAGAA  | NM_182606: | NM_182606:                               |
| 132724 | TMPRSS11B transmembrane protease, serine 11B                                    | 0.80   | TACACTGAGTCTTCAATTTA   | NM_182502: | NM_182502:                               |
| 132724 | TMPRSS11B transmembrane protease, serine 11B                                    | -0.07  | CACATGAGCTACGATCTTTA   | NM_182502: | NM_182502:                               |
| 9407   | TMPRSS11D transmembrane protease, serine 11D                                    | -1.10  | TACCTTGACTGGATTAGGCAAA | NM_004262: | NM_004262:                               |
| 9407   | TMPRSS11D transmembrane protease, serine 11D                                    | -0.70  | CAGGAGTGTATCTCGAGTGA   | NM_004262: | NM_004262:                               |
| 28983  | TMPRSS11E transmembrane protease, serine 11E                                    | 0.24   | CAAGCTTACAATGACGCCATA  | NM_014058: | NM_014058:                               |
| 28983  | TMPRSS11E transmembrane protease, serine 11E                                    | -0.12  | ACCCATCACATGACTATGATA  | NM_014058: | NM_014058:                               |
| 389208 | TMPRSS11F transmembrane protease, serine 11F                                    | -1.01  | CACGAGCTGAATCAAAAGAAA  | NM_207407: | NM_207407:                               |
| 389208 | TMPRSS11F transmembrane protease, serine 11F                                    | -4.25  | CTGGCTTATATCAATAATA    | NM_207407: | NM_207407:                               |
| 283471 | TMPRSS12 transmembrane protease, serine 12                                      | 0.03   | GTGATTGGAAGTAAATAATA   | NM_182559: | NM_182559:                               |
| 283471 | TMPRSS12 transmembrane protease, serine 12                                      | -1.49  | CCAAATAATAGTTTATAATTA  | NM_182559: | NM_182559:                               |
| 84000  | TMPRSS13 transmembrane protease, serine 13                                      | -2.20  | ACGGAAATGCATCTCCAGCAA  | NM_032046: | NM_032046:                               |
| 84000  | TMPRSS13 transmembrane protease, serine 13                                      | -0.01  | CTGGAAATACCTGGAGACAAA  | NM_032046: | NM_032046:                               |
| 7113   | TMPRSS2 transmembrane protease, serine 2                                        | -0.19  | ACGGACTGGATTTATCGACAAA | NM_005656: | NM_005656:                               |
| 7113   | TMPRSS2 transmembrane protease, serine 2                                        | -0.46  | CAGGAGTGCAGGGAATGTGA   | NM_005656: | NM_005656:                               |
| 64699  | TMPRSS3 transmembrane protease, serine 3                                        | 0.23   | AAGCTATGTGAGTTCAGATAA  | NM_024022: | NM_032401;NM_024022;NM_032405;NM_032404: |
| 64699  | TMPRSS3 transmembrane protease, serine 3                                        | -0.49  | CTGGAAGGTCCTACTCGCAAA  | NM_024022: | NM_032401;NM_024022;NM_032405;NM_032404: |
| 56649  | TMPRSS4 transmembrane protease, serine 4                                        | 0.15   | CTGGATGTTGTTGAAATACAA  | NM_019894: | NM_183247;NM_019894:                     |
| 56649  | TMPRSS4 transmembrane protease, serine 4                                        | 0.68   | CAGGATCTGGATGTTGTTGAA  | NM_019894: | NM_183247;NM_019894:                     |
| 80975  | TMPRSS5 transmembrane protease, serine 5 (spinesin)                             | -0.04  | AAAGTGATATATGGTCTTGAA  | NM_030770: | NM_030770:                               |
| 80975  | TMPRSS5 transmembrane protease, serine 5 (spinesin)                             | 0.75   | AACAGTATCTTTCAGAAATAA  | NM_030770: | NM_030770:                               |
| 164656 | TMPRSS6 (tr;transmembrane protease, serine 6                                    | -0.12  | CACGGCCGGGATCACCATCAA  | NM_153609: | NM_153609:                               |
| 164656 | TMPRSS6 (tr;transmembrane protease, serine 6                                    | -3.42  | CACGCTGGGTTGTTACCGCTA  | NM_153609: | NM_153609:                               |
| 344805 | TMPRSS7 (tr;transmembrane protease, serine 7                                    | 0.23   | TGCGATTACTGCTCAACCCATA | XM_293599: | XM_293599:                               |
| 344805 | TMPRSS7 (tr;transmembrane protease, serine 7                                    | 1.47   | CCGAGCTACTACTCCCAAAA   | XM_293599: | XM_293599:                               |
| 360200 | TMPRSS9 transmembrane protease, serine 9                                        | 0.24   | CGGGCCAACTGCCAACTCAA   | NM_182973: | NM_182973:                               |
| 360200 | TMPRSS9 transmembrane protease, serine 9                                        | 0.89   | CACCGGCATCACAGGCTAAA   | NM_182973: | NM_182973:                               |
| 3371   | TNC tenascin C (hexabrachion)                                                   | -0.19  | CCGGCATCAGTCCCGGTTA    | NM_002160: | NM_002160:                               |
| 3371   | TNC tenascin C (hexabrachion)                                                   | -0.37  | CTGGGATGCCCTCAAACCTCAA | NM_002160: | NM_002160:                               |
| 7124   | TNF tumor necrosis factor (TNF superfamily, member 2)                           | -0.05  | CCGACTCAGCGCTGAGATCAA  | NM_000594: | NM_000594:                               |
| 7124   | TNF tumor necrosis factor (TNF superfamily, member 2)                           | 0.69   | TAGGTCGGAAACCCAAAGCTTA | NM_000594: | NM_000594:                               |
| 7126   | TNFAIP1 tumor necrosis factor, alpha-induced protein 1 (endothelial)            | 0.05   | ACCATGTCTTCTACCCCTAA   | NM_021137: | NM_021137:                               |
| 7126   | TNFAIP1 tumor necrosis factor, alpha-induced protein 1 (endothelial)            | -0.73  | CAGGAGGTGAGTTCCTCTTTA  | NM_021137: | NM_021137:                               |
| 7127   | TNFAIP2 tumor necrosis factor, alpha-induced protein 2                          | -2.79  | CAGGATGATGCTGAAGATGAT  | NM_006291: | NM_006291:                               |
| 7127   | TNFAIP2 tumor necrosis factor, alpha-induced protein 2                          | -2.44  | CCGGATGCTCCATGGAGCAGAA | NM_006291: | NM_006291:                               |
| 7128   | TNFAIP3 tumor necrosis factor, alpha-induced protein 3                          | -2.02  | CAGCCTTTACTCATACTATTA  | NM_006290: | NM_006290:                               |
| 7128   | TNFAIP3 tumor necrosis factor, alpha-induced protein 3                          | 3.00   | CCGAGCTGTTCCACTTGTAA   | NM_006290: | NM_006290:                               |
| 7130   | TNFAIP6 tumor necrosis factor, alpha-induced protein 6                          | -0.69  | AAGCGGTGTGTAATTTGAA    | NM_007115: | NM_007115:                               |
| 7130   | TNFAIP6 tumor necrosis factor, alpha-induced protein 6                          | 1.46   | TGGCGTCTTTCACAGATCCAAA | NM_007115: | NM_007115:                               |
| 25816  | TNFAIP8 tumor necrosis factor, alpha-induced protein 8                          | 0.33   | CCGAGTACATGTGAGCGGTA   | NM_014350: | NM_014350:                               |
| 25816  | TNFAIP8 tumor necrosis factor, alpha-induced protein 8                          | -0.12  | TAGCATTGATGGAGAAATTTA  | NM_014350: | NM_014350:                               |
| 8797   | TNFRSF10A tumor necrosis factor receptor superfamily, member 10a                | 1.48   | ATCAAATTCATGATCAATCA   | NM_003844: | NM_003844:                               |
| 8797   | TNFRSF10A tumor necrosis factor receptor superfamily, member 10a                | 0.56   | CCGGTCCCAAGACCTTCAA    | NM_003844: | NM_003844:                               |
| 8795   | TNFRSF10B tumor necrosis factor receptor superfamily, member 10b                | 1.13   | CCGACTTCACTGATCACTATA  | AF016266:  | NM_003842;NM_147187:                     |
| 8795   | TNFRSF10B tumor necrosis factor receptor superfamily, member 10b                | 0.32   | CTGGACAACCTTACAAGTATA  | AF016266:  | NM_003842;NM_147187:                     |
| 8794   | TNFRSF10C tumor necrosis factor receptor superfamily, member 10c, decoy without | 0.37   | ACCAAGCTTCCCAACATGAA   | NM_003841: | NM_003841:                               |
| 8794   | TNFRSF10C tumor necrosis factor receptor superfamily, member 10c, decoy without | 0.59   | ATCGTAGGATCATAGTTCTTA  | NM_003841: | NM_003841:                               |
| 8793   | TNFRSF10D tumor necrosis factor receptor superfamily, member 10d, decoy with tr | -2.17  | CCGGAGTGACATCAAGTGCAA  | NM_003840: | NM_003840:                               |
| 8793   | TNFRSF10D tumor necrosis factor receptor superfamily, member 10d, decoy with tr | 0.48   | TAGAACGGGATTAATCTTTAA  | NM_003840: | NM_003840:                               |
| 8792   | TNFRSF11A tumor necrosis factor receptor superfamily, member 11a, NFKB activa   | 1.13   | ACCCGCTAGTGGTAAATTTA   | NM_003839: | NM_003839:                               |
| 8792   | TNFRSF11A tumor necrosis factor receptor superfamily, member 11a, NFKB activa   | -2.01  | CCCGTATAGTGGTAAATTTAT  | NM_003839: | NM_003839:                               |
| 4982   | TNFRSF11B tumor necrosis factor receptor superfamily, member 11b (osteoprotege  | 0.02   | CACAATGACAAATTTGATCAA  | NM_002546: | NM_002546:                               |
| 4982   | TNFRSF11B tumor necrosis factor receptor superfamily, member 11b (osteoprotege  | 1.43   | TACCTTCAATTTACAGCAAGAA | NM_002546: | NM_002546:                               |
| 51330  | TNFRSF12A tumor necrosis factor receptor superfamily, member 12A                | 1.22   | GAGGAGAAATTTAATAATAA   | NM_016639: | NM_016639:                               |
| 51330  | TNFRSF12A tumor necrosis factor receptor superfamily, member 12A                | -6.39  | CAGCTGACACTGACTAAGGAAA | NM_016639: | NM_016639:                               |
| 23495  | TNFRSF13B tumor necrosis factor receptor superfamily, member 13B                | -0.39  | AACCTAAGCAATGTGCATCA   | NM_012452: | NM_012452:                               |
| 23495  | TNFRSF13B tumor necrosis factor receptor superfamily, member 13B                | 0.24   | AAAGGAGCAAGGCAAGTTCTA  | NM_012452: | NM_012452:                               |
| 115650 | TNFRSF13C tumor necrosis factor receptor superfamily, member 13C                | -0.93  | CCGGGAATCTGATGCCCAA    | NM_052945: | NM_052945:                               |
| 115650 | TNFRSF13C tumor necrosis factor receptor superfamily, member 13C                | -4.24  | CTCCTGTTCCCTGCCTTCAA   | NM_052945: | NM_052945:                               |
| 8764   | TNFRSF14 tumor necrosis factor receptor superfamily, member 14 (herpesvirus e   | -14.86 | CACCTACATGGCCACCTCAA   | NM_003820: | NM_003820:                               |



|        |           |                                                                        |        |                        |            |                                                                                                                                                                                                                                                  |
|--------|-----------|------------------------------------------------------------------------|--------|------------------------|------------|--------------------------------------------------------------------------------------------------------------------------------------------------------------------------------------------------------------------------------------------------|
| 8764   | TNFRSF14  | tumor necrosis factor receptor superfamily, member 14 (herpesvirus e   | -0.76  | CTGCTGGAGTTCATCCTGCTA  | NM_003820: | NM_003820:                                                                                                                                                                                                                                       |
| 608    | TNFRSF17  | tumor necrosis factor receptor superfamily, member 17                  | 0.10   | AACCATTAAAGGACGAGTTTA  | NM_001192: | NM_001192:                                                                                                                                                                                                                                       |
| 608    | TNFRSF17  | tumor necrosis factor receptor superfamily, member 17                  | 1.79   | CTCGAGCAGTGCCACTTTAAA  | NM_001192: | NM_001192:                                                                                                                                                                                                                                       |
| 8784   | TNFRSF18  | tumor necrosis factor receptor superfamily, member 18                  | -2.24  | CAGGAGGGAGAGAGAGACACA  | NM_004195: | NM_004195;NM_148901;NM_148902:                                                                                                                                                                                                                   |
| 8784   | TNFRSF18  | tumor necrosis factor receptor superfamily, member 18                  | -1.74  | TCGGGATTCCTAGGTCATGAA  | NM_004195: | NM_004195;NM_148901;NM_148902:                                                                                                                                                                                                                   |
| 55504  | TNFRSF19  | tumor necrosis factor receptor superfamily, member 19                  | 0.62   | CAGCAGCTACTGATTTATCTA  | NM_018647: | NM_018647;NM_148957:                                                                                                                                                                                                                             |
| 55504  | TNFRSF19  | tumor necrosis factor receptor superfamily, member 19                  | -0.40  | TTGGATTCAAATAGCAGTCAA  | NM_018647: | NM_018647;NM_148957:                                                                                                                                                                                                                             |
| 84957  | TNFRSF19L | tumor necrosis factor receptor superfamily, member 19-like             | -0.51  | CACATCTGATTGGAACTCAA   | NM_032871: | NM_032871;NM_152222:                                                                                                                                                                                                                             |
| 84957  | TNFRSF19L | tumor necrosis factor receptor superfamily, member 19-like             | 0.05   | CCCGGAAACTTGGACCGAGA   | NM_032871: | NM_032871:                                                                                                                                                                                                                                       |
| 7132   | TNFRSF1A  | tumor necrosis factor receptor superfamily, member 1A                  | -0.15  | ACCGGCATTATTGGAGTGAAA  | NM_001065: | NM_001065:                                                                                                                                                                                                                                       |
| 7132   | TNFRSF1A  | tumor necrosis factor receptor superfamily, member 1A                  | 0.32   | CCCGGTGACTGTCCCACTTT   | NM_001065: | NM_001065:                                                                                                                                                                                                                                       |
| 7133   | TNFRSF1B  | tumor necrosis factor receptor superfamily, member 1B                  | 1.77   | AGGGTGATAAATTTGGTATAA  | NM_001066: | NM_001066:                                                                                                                                                                                                                                       |
| 7133   | TNFRSF1B  | tumor necrosis factor receptor superfamily, member 1B                  | -1.65  | CAGCCTTGGGTCTACTAATAA  | NM_001066: | NM_001066:                                                                                                                                                                                                                                       |
| 27242  | TNFRSF21  | tumor necrosis factor receptor superfamily, member 21                  | 0.02   | ACCGTGTAGAATGCTTGATTA  | NM_014452: | NM_014452:                                                                                                                                                                                                                                       |
| 27242  | TNFRSF21  | tumor necrosis factor receptor superfamily, member 21                  | 0.21   | TCAAAGTGACTAATTTATTTAA | NM_014452: | NM_014452:                                                                                                                                                                                                                                       |
|        |           |                                                                        |        |                        |            | NM_148973;NM_148974;NM_148965;NM_148966:<br>NM_148967;NM_148968;NM_148969;NM_148970:<br>NM_003790;NM_148971;NM_148972:<br>NM_148973;NM_148974;NM_148965;NM_148966:<br>NM_148967;NM_148968;NM_148969;NM_148970:<br>NM_003790;NM_148971;NM_148972: |
| 8718   | TNFRSF25  | tumor necrosis factor receptor superfamily, member 25                  | -0.45  | CGCGGTATTAATCTGTGAAAA  | NM_003790: | NM_003790;NM_148971;NM_148972:<br>NM_148973;NM_148974;NM_148965;NM_148966:<br>NM_148967;NM_148968;NM_148969;NM_148970:<br>NM_003790;NM_148971;NM_148972:                                                                                         |
| 8718   | TNFRSF25  | tumor necrosis factor receptor superfamily, member 25                  | -1.18  | CACCGTCCAGTTGGTGGGTAA  | NM_003790: | NM_003790;NM_148971;NM_148972:<br>NM_148973;NM_148974;NM_148965;NM_148966:<br>NM_148967;NM_148968;NM_148969;NM_148970:<br>NM_003790;NM_148971;NM_148972:                                                                                         |
| 939    | TNFRSF7   | tumor necrosis factor receptor superfamily, member 7                   | -2.70  | AAGGTTGGCTTGGCCACCTGAA | NM_001242: | NM_001242:                                                                                                                                                                                                                                       |
| 939    | TNFRSF7   | tumor necrosis factor receptor superfamily, member 7                   | -2.07  | ACCGAGTGTGATCCTCTTCCA  | NM_001242: | NM_001242:                                                                                                                                                                                                                                       |
| 943    | TNFRSF8   | tumor necrosis factor receptor superfamily, member 8                   | 4.27   | CACGGAGCACACCAATAACAA  | NM_001243: | NM_152942;NM_001243:                                                                                                                                                                                                                             |
| 943    | TNFRSF8   | tumor necrosis factor receptor superfamily, member 8                   | -1.51  | TCGGCAGGGATGATTGTCAA   | NM_001243: | NM_001243:                                                                                                                                                                                                                                       |
| 3604   | TNFRSF9   | tumor necrosis factor receptor superfamily, member 9                   | -0.35  | ATCCGTATCACAGCTTTCAA   | NM_001561: | NM_001561:                                                                                                                                                                                                                                       |
| 3604   | TNFRSF9   | tumor necrosis factor receptor superfamily, member 9                   | 0.02   | TCGGTGGTTCGTGCTGTAA    | NM_001561: | NM_001561:                                                                                                                                                                                                                                       |
| 8743   | TNFSF10   | tumor necrosis factor (ligand) superfamily, member 10                  | 1.18   | AACACAAGAAGCACAACAAA   | NM_003810: | NM_003810:                                                                                                                                                                                                                                       |
| 8743   | TNFSF10   | tumor necrosis factor (ligand) superfamily, member 10                  | 1.02   | ATGGTCCAATATATTTCAAAA  | NM_003810: | NM_003810:                                                                                                                                                                                                                                       |
| 8600   | TNFSF11   | tumor necrosis factor (ligand) superfamily, member 11                  | -1.06  | ACGGGTTGACCTTATGAGAAA  | NM_003701: | NM_003701;NM_003701:                                                                                                                                                                                                                             |
| 8600   | TNFSF11   | tumor necrosis factor (ligand) superfamily, member 11                  | 2.04   | CAGATGGATCCTAATAGAATA  | NM_003701: | NM_003701;NM_003701:                                                                                                                                                                                                                             |
| 8742   | TNFSF12   | tumor necrosis factor (ligand) superfamily, member 12                  | 0.26   | CAGGGCATTGTGTCACTGTA   | NM_003809: | NM_003809;NM_153012:                                                                                                                                                                                                                             |
| 8742   | TNFSF12   | tumor necrosis factor (ligand) superfamily, member 12                  | -0.16  | TTAAATAGAATAAGTCATAAA  | NM_003809: | NM_003809;NM_153012:                                                                                                                                                                                                                             |
| 10673  | TNFSF13B  | tumor necrosis factor (ligand) superfamily, member 13b                 | -0.60  | CACGCCTTACTCTTGGCCTTA  | NM_006573: | NM_006573:                                                                                                                                                                                                                                       |
| 10673  | TNFSF13B  | tumor necrosis factor (ligand) superfamily, member 13b                 | 0.02   | CGGAGGTAATAAGCCAGCAAA  | NM_006573: | NM_006573:                                                                                                                                                                                                                                       |
| 8740   | TNFSF14   | tumor necrosis factor (ligand) superfamily, member 14                  | -2.50  | AAGCTGGCTACTACTCATCT   | NM_003807: | NM_003807;NM_172014:                                                                                                                                                                                                                             |
| 8740   | TNFSF14   | tumor necrosis factor (ligand) superfamily, member 14                  | 0.30   | AAGCTGATACAGAGCGGAAGG  | NM_003807: | NM_003807;NM_172014:                                                                                                                                                                                                                             |
| 9966   | TNFSF15   | tumor necrosis factor (ligand) superfamily, member 15                  | 0.01   | AACGGTTAGCTATGAAATTT   | NM_005118: | NM_005118:                                                                                                                                                                                                                                       |
| 9966   | TNFSF15   | tumor necrosis factor (ligand) superfamily, member 15                  | 0.28   | ACCGAATGAACACTACCAACA  | NM_005118: | NM_005118:                                                                                                                                                                                                                                       |
| 8995   | TNFSF18   | tumor necrosis factor (ligand) superfamily, member 18                  | -0.51  | ATGGCTAAGTTGGACCATTA   | NM_005092: | NM_005092:                                                                                                                                                                                                                                       |
| 8995   | TNFSF18   | tumor necrosis factor (ligand) superfamily, member 18                  | 0.47   | CACCATAGACTTGTATTTCAA  | NM_005092: | NM_005092:                                                                                                                                                                                                                                       |
| 7292   | TNFSF4    | tumor necrosis factor (ligand) superfamily, member 4 (tax-transcriptor | 0.99   | AACGTTTACTGACTATAGGTA  | NM_003326: | NM_003326:                                                                                                                                                                                                                                       |
| 7292   | TNFSF4    | tumor necrosis factor (ligand) superfamily, member 4 (tax-transcriptor | -1.57  | CAGGCCAAGATTGCGAGGAA   | NM_003326: | NM_003326:                                                                                                                                                                                                                                       |
| 944    | TNFSF8    | tumor necrosis factor (ligand) superfamily, member 8                   | -2.67  | AAGGACTCTCTCACACAGGAA  | NM_001244: | NM_001244:                                                                                                                                                                                                                                       |
| 944    | TNFSF8    | tumor necrosis factor (ligand) superfamily, member 8                   | -0.44  | ACCCATATCAAGGGTGACTAA  | NM_001244: | NM_001244:                                                                                                                                                                                                                                       |
| 8744   | TNFSF9    | tumor necrosis factor (ligand) superfamily, member 9                   | 0.17   | CAAGTTGGACCTGATATTTA   | NM_003811: | NM_003811:                                                                                                                                                                                                                                       |
| 8744   | TNFSF9    | tumor necrosis factor (ligand) superfamily, member 9                   | -0.12  | CTGAGTTAGGTAATACGTGA   | NM_003811: | NM_003811:                                                                                                                                                                                                                                       |
| 23043  | TNIK      | TRAF2 and NCK interacting kinase                                       | 0.72   | AAGGACCATATTTGATAGAACA | XM_039796: | XM_039796;NM_015028:                                                                                                                                                                                                                             |
| 23043  | TNIK      | TRAF2 and NCK interacting kinase                                       | -3.09  | CTGGAATATAAGCGCAACAA   | XM_039796: | XM_039796;NM_015028:                                                                                                                                                                                                                             |
| 8711   | TNK1      | tyrosine kinase, non-receptor, 1                                       | -6.26  | AAGGATCTAGCTGCCCCACTA  | NM_003985: | NM_003985:                                                                                                                                                                                                                                       |
| 8711   | TNK1      | tyrosine kinase, non-receptor, 1                                       | 1.34   | ATGGTCTAGTGAACCTGGGA   | NM_003985: | NM_003985:                                                                                                                                                                                                                                       |
| 10188  | TNK2      | tyrosine kinase, non-receptor, 2                                       | -2.71  | ACGCAAGTCGTGGATGAGTAA  | NM_005781: | NM_005781;NM_001010938:                                                                                                                                                                                                                          |
| 10188  | TNK2      | tyrosine kinase, non-receptor, 2                                       | -5.80  | CGGCAGTCAGATCCTGCATAA  | NM_005781: | NM_005781;NM_001010938:                                                                                                                                                                                                                          |
| 63923  | TNN       | tenascin N                                                             | -0.35  | CTGGTCACTGCAAGAATGAA   | XM_040527: | XM_040527;NM_022093:                                                                                                                                                                                                                             |
| 63923  | TNN       | tenascin N                                                             | 0.19   | CTGGTGTATGAGGAAGAATA   | XM_040527: | XM_040527;NM_022093:                                                                                                                                                                                                                             |
| 7137   | TNNI3     | troponin I type 3 (cardiac)                                            | -0.05  | ACGGAGCCGACGCCAAGAAA   | NM_000363: | NM_000363:                                                                                                                                                                                                                                       |
| 7137   | TNNI3     | troponin I type 3 (cardiac)                                            | 0.11   | TAAGATCTCCGCTCGAGAAA   | NM_000363: | NM_000363:                                                                                                                                                                                                                                       |
| 51086  | TNNI3K    | TNNI3 interacting kinase                                               | -0.01  | CAGCATTCCGGGTATACCTAA  | NM_015978: | NM_015978:                                                                                                                                                                                                                                       |
| 51086  | TNNI3K    | TNNI3 interacting kinase                                               | 0.95   | GGAGCTAATGTCAATATTGAA  | NM_015978: | NM_015978:                                                                                                                                                                                                                                       |
| 7138   | TNNT1     | troponin T type 1 (skeletal, slow)                                     | 1.18   | CCATCGGTAGCTTGAATAAAA  | NM_003283: | NM_003283:                                                                                                                                                                                                                                       |
| 7138   | TNNT1     | troponin T type 1 (skeletal, slow)                                     | 0.20   | AAGGCTCAGCCTCAAGATCCA  | NM_003283: | NM_003283:                                                                                                                                                                                                                                       |
|        |           |                                                                        |        |                        |            | NM_001001430;NM_001001432;NM_001001431;N<br>M_000364:<br>NM_001001430;NM_001001432;NM_001001431;N<br>M_000364:                                                                                                                                   |
| 7139   | TNNT2     | troponin T type 2 (cardiac)                                            | -8.88  | CAGGATCAACGATAACCAGAA  | NM_000364: | NM_000364;NM_002270;NM_153188:<br>NM_002270;NM_153188:                                                                                                                                                                                           |
| 7139   | TNNT2     | troponin T type 2 (cardiac)                                            | 1.48   | CGAACAAGGATCAACGATAA   | NM_000364: | NM_000364;NM_002270;NM_153188:<br>NM_002270;NM_153188:                                                                                                                                                                                           |
| 3842   | TNPO1     | transportin 1                                                          | -0.67  | CTGGAACAACCTAATCAGTAT  | NM_002270: | NM_002270;NM_153188:                                                                                                                                                                                                                             |
| 3842   | TNPO1     | transportin 1                                                          | 1.38   | CAGCATGTTAAAGCCTGTATA  | NM_002270: | NM_002270;NM_153188:                                                                                                                                                                                                                             |
| 23534  | TNPO3     | transportin 3                                                          | -13.53 | ACCGAATGCTTACGTAAGTAA  | NM_012470: | NM_012470:                                                                                                                                                                                                                                       |
| 23534  | TNPO3     | transportin 3                                                          | -9.89  | CTGGAGATCCTTACAGTGTAA  | NM_012470: | NM_012470:                                                                                                                                                                                                                                       |
| 7143   | TNR       | (tenascin tenascin R (restrictin, janusin)                             | -2.07  | TGCGAGGAATCGCGTGGCTAA  | NM_003285: | NM_003285:                                                                                                                                                                                                                                       |
| 7143   | TNR       | (tenascin tenascin R (restrictin, janusin)                             | 0.56   | ACCCAGGTACCGAATACGAAA  | NM_003285: | NM_003285:                                                                                                                                                                                                                                       |
| 57690  | TNRC6C    | trinucleotide repeat containing 6C                                     | -3.43  | CGGTACGATTTAATCCAGAA   | NM_018996: | NM_018996:                                                                                                                                                                                                                                       |
| 57690  | TNRC6C    | trinucleotide repeat containing 6C                                     | 0.22   | CAGCTGGCATACCAACGTTTA  | NM_018996: | NM_018996:                                                                                                                                                                                                                                       |
| 7145   | TNS1      | tensin 1                                                               | 0.93   | CCACAGATGAATCGAAGATA   | NM_022648: | NM_022648:                                                                                                                                                                                                                                       |
| 7145   | TNS1      | tensin 1                                                               | -4.32  | CTGGGTAGATGAAACTGCAA   | NM_022648: | NM_022648:                                                                                                                                                                                                                                       |
| 64759  | TNS3      | tensin 3                                                               | 1.77   | CAGGACCTCGAATATTATCGAT | NM_022748: | NM_022748:                                                                                                                                                                                                                                       |
| 64759  | TNS3      | tensin 3                                                               | -0.06  | CGGTGTGATTGGGACTACAA   | NM_022748: | NM_022748:                                                                                                                                                                                                                                       |
| 7148   | TNXB      | tenascin XB                                                            | 0.10   | CTCCTTGGTCCAGTACAA     | NM_019105: | NM_019105:                                                                                                                                                                                                                                       |
| 7148   | TNXB      | tenascin XB                                                            | 1.05   | CCCGTGTCTGCTGTGGTTTA   | NM_019105: | NM_019105:                                                                                                                                                                                                                                       |
| 10140  | TOB1      | transducer of ERBB2, 1                                                 | 0.02   | CAGATATGGCCTCTACAGTA   | NM_005749: | NM_005749:                                                                                                                                                                                                                                       |
| 10140  | TOB1      | transducer of ERBB2, 1                                                 | -1.30  | CCAGCCTGTTATGGCTAECTA  | NM_005749: | NM_005749:                                                                                                                                                                                                                                       |
| 54472  | TOLLIP    | tol1 interacting protein                                               | 0.07   | CACGCTTGGCGCCATCTCTTA  | NM_019009: | NM_019009:                                                                                                                                                                                                                                       |
| 54472  | TOLLIP    | tol1 interacting protein                                               | 0.49   | CCCAGTATAACGGACAGAAA   | NM_019009: | NM_019009:                                                                                                                                                                                                                                       |
| 10043  | TOM1      | (target target of myb1 (chicken)                                       | 0.76   | AACGGTTTGAACGGTCCGAA   | NM_005488: | NM_005488:                                                                                                                                                                                                                                       |
| 10043  | TOM1      | (target target of myb1 (chicken)                                       | 0.10   | CACCAGCGAAGAATTTGACAA  | NM_005488: | NM_005488:                                                                                                                                                                                                                                       |
| 9804   | TOMM20    | translocase of outer mitochondrial membrane 20 homolog (yeast)         | -0.81  | AACGATGAGAGTAAGTTGCAA  | NM_014765: | NM_014765:                                                                                                                                                                                                                                       |
| 9804   | TOMM20    | translocase of outer mitochondrial membrane 20 homolog (yeast)         | -1.21  | CACAGTTTTCAGAACTGAGTAA | NM_014765: | NM_014765:                                                                                                                                                                                                                                       |
| 56993  | TOMM22    | translocase of outer mitochondrial membrane 22 homolog (yeast)         | 1.12   | TTGGTCTATGTACTCTTTTA   | NM_020243: | NM_020243:                                                                                                                                                                                                                                       |
| 56993  | TOMM22    | translocase of outer mitochondrial membrane 22 homolog (yeast)         | 1.28   | ATGCACTGTGTAATATATAA   | NM_020243: | NM_020243:                                                                                                                                                                                                                                       |
| 10953  | TOMM34    | translocase of outer mitochondrial membrane 34                         | 0.19   | CACCTGGAACCTCTGTAGTAA  | NM_006809: | NM_006809:                                                                                                                                                                                                                                       |
| 10953  | TOMM34    | translocase of outer mitochondrial membrane 34                         | 0.16   | ACCGAGCAGCATGTCACTTGA  | NM_006809: | NM_006809:                                                                                                                                                                                                                                       |
| 10452  | TOMM40    | translocase of outer mitochondrial membrane 40 homolog (yeast)         | 0.02   | CTGGTATAAATCATGTTTAT   | NM_006114: | NM_006114:                                                                                                                                                                                                                                       |
| 10452  | TOMM40    | translocase of outer mitochondrial membrane 40 homolog (yeast)         | 0.86   | TGGGTATAAATCATGTTTATA  | NM_006114: | NM_006114:                                                                                                                                                                                                                                       |
| 84134  | TOMM40L   | translocase of outer mitochondrial membrane 40 homolog-like (yeast)    | 0.01   | CTGCAGTACAGTATTCATTA   | NM_032174: | NM_032174:                                                                                                                                                                                                                                       |
| 84134  | TOMM40L   | translocase of outer mitochondrial membrane 40 homolog-like (yeast)    | 0.79   | TAGAGGCTTGGTGGATAGTAA  | NM_032174: | NM_032174:                                                                                                                                                                                                                                       |
| 7150   | TOP1      | topoisomerase (DNA) I                                                  | 0.73   | CGGGAAGGACTCCATCAGATA  | NM_003286: | NM_003286:                                                                                                                                                                                                                                       |
| 7150   | TOP1      | topoisomerase (DNA) I                                                  | -0.01  | GCCCAGGATATAATCATCAA   | NM_003286: | NM_003286:                                                                                                                                                                                                                                       |
| 116447 | TOP1MT    | topoisomerase (DNA) I, mitochondrial                                   | 1.71   | GTGGAGAAGATCTCACAGCAA  | NM_052963: | NM_052963:                                                                                                                                                                                                                                       |
| 116447 | TOP1MT    | topoisomerase (DNA) I, mitochondrial                                   | -4.38  | CCAGCAGAGATCCAGGCAAA   | NM_052963: | NM_052963:                                                                                                                                                                                                                                       |

|        |          |                                                                  |       |                         |            |                                          |
|--------|----------|------------------------------------------------------------------|-------|-------------------------|------------|------------------------------------------|
| 7153   | TOP2A    | topoisomerase (DNA) II alpha 170kDa                              | -1.63 | ACGAATAACCATAGAAATGAA   | NM_001067: | NM_001067:                               |
| 7153   | TOP2A    | topoisomerase (DNA) II alpha 170kDa                              | 0.60  | CACGTAGGCTGTTAAAGAAA    | NM_001067: | NM_001067:                               |
| 7155   | TOP2B    | topoisomerase (DNA) II beta 180kDa                               | 0.31  | TCGGGCTAGGAAAGAAAGTAA   | NM_001068: | NM_001068:                               |
| 7155   | TOP2B    | topoisomerase (DNA) II beta 180kDa                               | -2.73 | CAGCCGAAGAACTAATAACA    | NM_001068: | NM_001068:                               |
| 7156   | TOP3A    | topoisomerase (DNA) III alpha                                    | 0.53  | CTGTGTACAGGTTAAAGTTAA   | NM_004618: | NM_004618:                               |
| 7156   | TOP3A    | topoisomerase (DNA) III alpha                                    | 0.01  | TTCTCGAAAGTTGAGAATAAA   | NM_004618: | NM_004618:                               |
| 10210  | TOPORS   | topoisomerase I binding, arginine/serine-rich                    | 1.98  | CTGGAAATGTGTTATAAGCTA   | NM_005802: | NM_005802:                               |
| 10210  | TOPORS   | topoisomerase I binding, arginine/serine-rich                    | 0.89  | CAAGAGCTGGATATTAATGTA   | NM_005802: | NM_005802:                               |
| 1861   | TOR1A    | torsin family 1, member A (torsin A)                             | 0.45  | CCAGTGAATGTTCCGTGTTTGA  | NM_000113: | NM_000113:                               |
| 1861   | TOR1A    | torsin family 1, member A (torsin A)                             | -0.38 | CACCAAGTTAGATATTTACTA   | NM_000113: | NM_000113:                               |
| 9760   | TOX      | thymus high mobility group box protein TOX                       | 0.09  | TACAGTAGCTTTACATTAAA    | NM_004522: | NM_004522:                               |
| 7157   | TP53     | tumor protein p53 (Li-Fraumeni syndrome)                         | -2.06 | CAGCATCTTATCCGAGTGGAA   | NM_000546: | NM_000546:                               |
| 7157   | TP53     | tumor protein p53 (Li-Fraumeni syndrome)                         | 0.66  | TTGCAGTTAAGGGTTAGTTTA   | NM_000546: | NM_000546:                               |
| 7158   | TP53BP1  | tumor protein p53 binding protein, 1                             | 0.38  | CAGGACAGCTTTCCACGAA     | NM_005657: | NM_005657:                               |
| 7158   | TP53BP1  | tumor protein p53 binding protein, 1                             | 1.04  | TTGTTTGACCAGAGCAATAAA   | NM_005657: | NM_005657:                               |
| 7159   | TP53BP2  | tumor protein p53 binding protein, 2                             | 0.41  | ACCGTGTATCTCAGTAACAAT   | NM_005426: | NM_005426:NM_001031685:                  |
| 7159   | TP53BP2  | tumor protein p53 binding protein, 2                             | -2.10 | CACGAGCGTGAAGAGACAAA    | NM_005426: | NM_005426:NM_001031685:                  |
| 9537   | TP53I1   | tumor protein p53 inducible protein 11                           | -2.06 | CCCGTTAGTCCCTGATCCCAA   | AK054815:  | NM_006034:                               |
| 9537   | TP53I1   | tumor protein p53 inducible protein 11                           | 0.85  | TAGGCAATGAAATCAAGTTTA   | AK054815:  | NM_006034:                               |
| 9540   | TP53I3   | tumor protein p53 inducible protein 3                            | 0.04  | AAGCTGATAGGAAATAAAA     | NM_004881: | NM_147184:NM_004881:                     |
| 9540   | TP53I3   | tumor protein p53 inducible protein 3                            | 1.02  | CAGAGCCGTTTAAAGCTGATA   | NM_004881: | NM_147184:NM_004881:                     |
| 94241  | TP53INP1 | tumor protein p53 inducible nuclear protein 1                    | -1.01 | CCGCGTCAGTACAATTTACTA   | NM_033285: | NM_033285:                               |
| 94241  | TP53INP1 | tumor protein p53 inducible nuclear protein 1                    | -0.62 | CTGGGAGACACTAGTAGTATA   | NM_033285: | NM_033285:                               |
| 112858 | TP53RK   | TP53 regulating kinase                                           | 1.65  | AAGTATTGCGGTATAACATTA   | NM_033550: | NM_033550:                               |
| 112858 | TP53RK   | TP53 regulating kinase                                           | -0.04 | TAAGTTTATACCCTAAACAA    | NM_033550: | NM_033550:                               |
| 112858 | TP53RK   | TP53 regulating kinase                                           | 0.41  | CACAATGATGATATAGGGATA   | NM_032279: | NM_033550:                               |
| 7161   | TP73     | tumor protein p73                                                | -0.01 | ATCGAGTATTTCCCTCCCAA    | NM_005427: | NM_005427:                               |
| 7161   | TP73     | tumor protein p73                                                | 0.33  | CCCGGATGCTCAACCAACAT    | NM_005427: | NM_005427:                               |
| 8626   | TP73L    | tumor protein p73-like                                           | 0.46  | AAGGGCCAGCGTGGCTCTAAA   | NM_003722: | NM_003722:                               |
| 8626   | TP73L    | tumor protein p73-like                                           | 0.71  | CACCCTTATAGTCTAAGACTA   | NM_003722: | NM_003722:                               |
| 53373  | TPCN1    | two pore segment channel 1                                       | -0.71 | CGAGCTGATTTTCATCATGAA   | NM_017901: | NM_017901:                               |
| 53373  | TPCN1    | two pore segment channel 1                                       | 1.28  | TAACACAATAGTATTACTCTA   | NM_017901: | NM_017901:                               |
| 219931 | TPCN2    | two pore segment channel 2                                       | -0.90 | CAGGTGTTCTGGATGCATAT    | NM_139075: | NM_139075:                               |
| 219931 | TPCN2    | two pore segment channel 2                                       | 0.35  | CTGGTGGTGGTCTACTACGTA   | NM_139075: | NM_139075:                               |
| 89882  | TPD52L3  | tumor protein D52-like 3                                         | -3.98 | ATGGACCTAACTATACATCTT   | NM_033516: | NM_033516:                               |
| 89882  | TPD52L3  | tumor protein D52-like 3                                         | 1.08  | TAGACGAAATGTGCCATTATA   | NM_033516: | NM_033516:                               |
| 89882  | TPD52L3  | tumor protein D52-like 3                                         | 1.12  | ATCATATACTTCAGACATCAA   | BC033792:  | NM_001001874:                            |
| 89882  | TPD52L3  | tumor protein D52-like 3                                         | -3.74 | ATGGACCTAACTATACATCTT   | BC033792:  | NM_033516:                               |
| 7166   | TPH1     | tryptophan hydroxylase 1 (tryptophan 5-monoxygenase)             | -0.19 | CGGAGTATTCAGATCCTGAAA   | NM_004179: | NM_004179:                               |
| 7166   | TPH1     | tryptophan hydroxylase 1 (tryptophan 5-monoxygenase)             | 1.04  | TCCATTGGAGTGAAGTATAA    | NM_004179: | NM_004179:                               |
| 121278 | TPH2     | tryptophan hydroxylase 2                                         | 0.56  | CTGAAATAACGATTTATGTTT   | NM_173353: | NM_173353:                               |
| 121278 | TPH2     | tryptophan hydroxylase 2                                         | -0.22 | CTCAGTATACTCAATCCCTA    | NM_173353: | NM_173353:                               |
| 27010  | TPK1     | thiamin pyrophosphokinase 1                                      | -5.61 | AACCTGGTGCATCGAAATGTA   | NM_022445: | NM_022445:                               |
| 27010  | TPK1     | thiamin pyrophosphokinase 1                                      | -1.37 | CAGGTTGTCTGATAGAAATGA   | NM_022445: | NM_022445:                               |
| 7168   | TPM1     | tropomyosin 1 (alpha)                                            | 0.23  | AACGATATGACTTCCATGTAA   | NM_000366: | NM_000366:                               |
| 7168   | TPM1     | tropomyosin 1 (alpha)                                            | 0.60  | TGCGGAGAGGTCAGTAACTAA   | NM_000366: | NM_000366:                               |
| 7172   | TPMT     | (thiopu thiopurine S-methyltransferase                           | -1.66 | ACCGGTTGAATGGACAACCTAA  | NM_000367: | NM_000367:                               |
| 7172   | TPMT     | (thiopu thiopurine S-methyltransferase                           | -9.64 | CACCGGTTGAATGGACAACCTAA | NM_000367: | NM_000367:                               |
| 7173   | TPO      | thyroid peroxidase                                               | 0.29  | TGCGGAGTGCAGAAACACCAA   | NM_000547: | NM_175722:NM_175720:NM_175719:NM_000547: |
| 7173   | TPO      | thyroid peroxidase                                               | -6.78 | AAGGCTCTTTGTGCTGTCCAA   | NM_000547: | NM_175722:NM_175721:NM_175720:NM_000547: |
| 7174   | TPP2     | (tripepti tripeptidyl peptidase II                               | 0.32  | CCCGATTATTCGGTATTCTAA   | NM_003291: | NM_003291:                               |
| 7174   | TPP2     | (tripepti tripeptidyl peptidase II                               | 0.75  | ATGGAAGCAATAATAATTTTA   | NM_003291: | NM_003291:                               |
| 23430  | TPSD1    | tryptase delta 1                                                 | 0.21  | AACCACCTTTGCAACGGCGAA   | NM_012217: | NM_012217:                               |
| 23430  | TPSD1    | tryptase delta 1                                                 | -0.03 | AATGGAACCGGACATCAAGGA   | NM_012217: | NM_012217:                               |
| 25823  | TPSG1    | tryptase gamma 1                                                 | 1.71  | CCAAGTGCAATTTTAAATAA    | NM_012467: | NM_012467:                               |
| 25823  | TPSG1    | tryptase gamma 1                                                 | 1.57  | CCCGGCTCTTCCCTCTGTGCTA  | NM_012467: | NM_012467:                               |
| 7179   | TPTE     | transmembrane phosphatase with tensin homology                   | -0.68 | CAGATTGGCAACCAAGACTAA   | NM_013315: | NM_199261:NM_013315:NM_199259:NM_199260: |
| 7179   | TPTE     | transmembrane phosphatase with tensin homology                   | 0.34  | CTGAAATATGTTCAACTGCAA   | NM_013315: | NM_199261:NM_013315:NM_199259:NM_199260: |
| 93492  | TPTE2    | transmembrane phosphoinositide 3-phosphatase and tensin homology | 1.33  | ACCTGGAGAACTGATAATAAAA  | NM_130785: | NM_130785:NM_199254:NM_199255:           |
| 93492  | TPTE2    | transmembrane phosphoinositide 3-phosphatase and tensin homology | -4.94 | CTGATAATAAATTTGGTGTTA   | NM_130785: | NM_130785:NM_199254:NM_199255:           |
| 22974  | TPX2     | TPX2, microtubule-associated, homolog (Xenopus laevis)           | -9.65 | AAGGATGATTTAACCCTGTTA   | NM_012112: | NM_012112:                               |
| 22974  | TPX2     | TPX2, microtubule-associated, homolog (Xenopus laevis)           | 0.70  | AAGGCAATAATGAGATGTAA    | NM_012112: | NM_012112:                               |
| 126382 | TRA16    | TR4 orphan receptor associated protein TRA16                     | -2.47 | CAGGGTGAAGTTCAGTGCCTAA  | NM_176880: | NM_176880:                               |
| 126382 | TRA16    | TR4 orphan receptor associated protein TRA16                     | -0.99 | CAAGAGCTATTTCCGAGAGAAA  | NM_176880: | NM_176880:                               |
| 8717   | TRADD    | TNFRSF1A-associated via death domain                             | 1.45  | AGCAATGATAATAAAGTATAA   | NM_003789: | NM_153425:NM_003789:                     |
| 8717   | TRADD    | TNFRSF1A-associated via death domain                             | 0.97  | CCCGAATGTTAAGCAATGATA   | NM_003789: | NM_153425:NM_003789:                     |
| 7185   | TRAF1    | TNF receptor-associated factor 1                                 | -1.52 | AGGGCTCCACTAGGACTTCAA   | NM_005658: | NM_005658:                               |
| 7185   | TRAF1    | TNF receptor-associated factor 1                                 | -2.61 | CAGACTGTATCAGTATCCCAA   | NM_005658: | NM_005658:                               |
| 7186   | TRAF2    | TNF receptor-associated factor 2                                 | -0.12 | CACGAGGGCATATATGAAGAA   | NM_021138: | NM_021138:                               |
| 7186   | TRAF2    | TNF receptor-associated factor 2                                 | -0.41 | CTGGACCAAGACAAAGATTGAA  | NM_021138: | NM_021138:                               |
| 7187   | TRAF3    | TNF receptor-associated factor 3                                 | 0.87  | AGAGAGCATCGTTAAAGTAA    | NM_003300: | NM_145725:NM_145726:NM_003300:           |
| 7187   | TRAF3    | TNF receptor-associated factor 3                                 | -0.11 | TCCGATGATCGCGCTGCAGAA   | NM_003300: | NM_145725:NM_145726:NM_003300:           |
| 26146  | TRAF3IP1 | TNF receptor-associated factor 3 interacting protein 1           | 0.50  | CAACTAGTATTTCCGGATGATA  | NM_015650: | NM_015650:                               |
| 26146  | TRAF3IP1 | TNF receptor-associated factor 3 interacting protein 1           | 0.01  | AAGAAGCTAATTAACCTCAA    | NM_015650: | NM_015650:                               |
| 80342  | TRAF3IP3 | TRAF3 interacting protein 3                                      | 0.52  | CAGACTTGGCACCAACATTA    | NM_025228: | NM_025228:                               |
| 80342  | TRAF3IP3 | TRAF3 interacting protein 3                                      | -0.86 | TAGCAGGGACTACAGATGAA    | NM_025228: | NM_025228:                               |
| 9618   | TRAF4    | TNF receptor-associated factor 4                                 | -0.76 | CACCAGGACATTCGAAAGCGA   | NM_004295: | NM_004295:NM_145751:                     |
| 9618   | TRAF4    | TNF receptor-associated factor 4                                 | -3.66 | CCGGAGCTGGAAGTACAAGTA   | NM_004295: | NM_004295:NM_145751:                     |
| 7188   | TRAF5    | TNF receptor-associated factor 5                                 | 0.19  | AGGGTACTTCATATAATGGAA   | NM_004619: | NM_004619:NM_145759:NM_001033910:        |
| 7188   | TRAF5    | TNF receptor-associated factor 5                                 | -0.22 | CTGGAGGGTACTTGTCTATAAT  | NM_004619: | NM_004619:NM_145759:NM_001033910:        |
| 7189   | TRAF6    | TNF receptor-associated factor 6                                 | 0.60  | AGGGATGAGTTTAAACCCTAA   | NM_004620: | NM_004620:NM_145803:                     |
| 7189   | TRAF6    | TNF receptor-associated factor 6                                 | -0.04 | CAGGGATGAGTTTAAACCCTAA  | NM_004620: | NM_004620:NM_145803:                     |
| 84231  | TRAF7    | TNF receptor-associated factor 7                                 | -1.60 | CACCCTGTGCTCCTCACACAA   | NM_032271: | NM_206835:NM_032271:                     |
| 84231  | TRAF7    | TNF receptor-associated factor 7                                 | 0.87  | GGGGACCGCATCCATGTTAAA   | NM_032271: | NM_206835:NM_032271:                     |
| 10293  | TRAFIP   | TRAF interacting protein                                         | 0.59  | CGTGTATGATATTGATCTCAA   | NM_005879: | NM_005879:                               |
| 10293  | TRAFIP   | TRAF interacting protein                                         | -0.35 | CGGACACCGCTGAGGTGATA    | NM_005879: | NM_005879:                               |
| 66008  | TRAK2    | trafficking protein, kinesin binding 2                           | -2.10 | CACGACCAGGTGTCATTACTA   | NM_015049: | NM_015049:                               |
| 66008  | TRAK2    | trafficking protein, kinesin binding 2                           | 0.14  | CAGGCACATTAATAATTGTA    | NM_015049: | NM_015049:                               |
| 23471  | TRAM1    | translocation associated membrane protein 1                      | -3.84 | CAGGGTAAAGTGGAAATCTA    | NM_014294: | NM_014294:                               |
| 23471  | TRAM1    | translocation associated membrane protein 1                      | -1.20 | ATGGTGTGAATGGAACTTAA    | NM_014294: | NM_014294:                               |
| 10131  | TRAP1    | TNF receptor-associated protein 1                                | 0.30  | CGCGCTCATCAAGAACTGAA    | NM_016292: | NM_016292:                               |
| 10131  | TRAP1    | TNF receptor-associated protein 1                                | -2.18 | CCGCTACCCCTGCACATATA    | NM_016292: | NM_016292:                               |
| 6399   | TRAPPC2  | trafficking protein particle complex 2                           | 1.22  | AGGAATAGTATCCTGCTATA    | NM_014563: | NM_014563:NM_001011658:                  |

|        |                                                     |                                                       |       |                        |               |                                                                  |
|--------|-----------------------------------------------------|-------------------------------------------------------|-------|------------------------|---------------|------------------------------------------------------------------|
| 6399   | TRAPP2                                              | trafficking protein particle complex 2                | -0.15 | TAGGTTGATCTTAATGTAACA  | NM_014563:    | NM_014563:NM_001011658:                                          |
| 51399  | TRAPP4                                              | trafficking protein particle complex 4                | 0.13  | CGAAAGATTTATGAGATTTA   | NM_016146:    | NM_016146:                                                       |
| 51399  | TRAPP4                                              | trafficking protein particle complex 4                | 2.04  | ATGGAGGAGCTAGGTCCATA   | NM_016146:    | NM_016146:                                                       |
| 50852  | TRAT1                                               | T cell receptor associated transmembrane adaptor 1    | -4.91 | AAGATGGAGATGAGCAACTA   | NM_016388:    | NM_016388:                                                       |
| 50852  | TRAT1                                               | T cell receptor associated transmembrane adaptor 1    | -1.15 | AAGCATGAATGCGTCTTGAA   | NM_016388:    | NM_016388:                                                       |
| 54210  | TREM1                                               | triggering receptor expressed on myeloid cells 1      | 1.35  | TCCGAGCTGCACTAAATTA    | NM_018643:    | NM_018643:                                                       |
| 54210  | TREM1                                               | triggering receptor expressed on myeloid cells 1      | 0.63  | GAGGATCATACTAGAAGACTA  | NM_018643:    | NM_018643:                                                       |
| 54209  | TREM2                                               | triggering receptor expressed on myeloid cells 2      | 0.10  | ATCCAAGACTGCATATTTAA   | NM_018965:    | NM_018965:                                                       |
| 54209  | TREM2                                               | triggering receptor expressed on myeloid cells 2      | -1.84 | AAGGAAGATGATGGGAGGAAA  | NM_018965:    | NM_018965:                                                       |
| 340205 | TREML1                                              | triggering receptor expressed on myeloid cells-like 1 | -0.13 | CACCACCTTCATTTGACAATA  | NM_178174:    | NM_178174:                                                       |
| 340205 | TREML1                                              | triggering receptor expressed on myeloid cells-like 1 | 1.45  | CAGGCGTACGTTTCTCACAGA  | NM_178174:    | NM_178174:                                                       |
| 79865  | TREML2                                              | triggering receptor expressed on myeloid cells-like 2 | -1.31 | CGATAGCTGGTGCATGCGCAA  | NM_024807:    | NM_024807:                                                       |
| 79865  | TREML2                                              | triggering receptor expressed on myeloid cells-like 2 | -1.22 | CTGCTGACAGTGTATACACAA  | NM_024807:    | NM_024807:                                                       |
| 285852 | TREML4                                              | triggering receptor expressed on myeloid cells-like 4 | 1.87  | TCAAGTTGAACATAACAATA   | NM_198153:    | NM_198153:                                                       |
| 285852 | TREML4                                              | triggering receptor expressed on myeloid cells-like 4 | -0.97 | GCCCAATTCGTTTACTTAA    | NM_198153:    | NM_198153:                                                       |
| 55809  | TRERF1                                              | transcriptional regulating factor 1                   | -2.30 | ACCAGGTTGTTGCCAACCAA   | NM_018415:    | NM_033501:NM_033502:NM_018415:                                   |
| 55809  | TRERF1                                              | transcriptional regulating factor 1                   | -1.52 | AAGCGAAATGCACACATGAA   | NM_018415:    | NM_033501:NM_033502:NM_018415:                                   |
| 11277  | TREX1                                               | three prime repair exonuclease 1                      | -5.42 | CAGCAGAACTGCCAGAGAA    | NM_016381:    | NM_033629:NM_032166:NM_016381:NM_033628:<br>NM_130384:NM_033627: |
| 11277  | TREX1                                               | three prime repair exonuclease 1                      | -0.97 | CTCCTTCCCTACCACATCAA   | NM_016381:    | NM_033629:NM_032166:NM_016381:NM_033628:<br>NM_130384:NM_033627: |
| 11219  | TREX2 (three three prime repair exonuclease 2       |                                                       | -0.35 | CACAATGGCCTTGGATTATGAT | NM_007205:    | NM_080701:                                                       |
| 11219  | TREX2 (three three prime repair exonuclease 2       |                                                       | -0.36 | CACGACGAGCTGGTGCCTTA   | NM_007205:    | NM_080701:                                                       |
| 7200   | TRH                                                 | thyrotropin-releasing hormone                         | 1.29  | ATGACAGTCATCTAATGATA   | NM_007117:    | NM_007117:                                                       |
| 7200   | TRH                                                 | thyrotropin-releasing hormone                         | 0.70  | TGGTTGTATATAACCCCTCTA  | NM_007117:    | NM_007117:                                                       |
| 29953  | TRHDE                                               | thyrotropin-releasing hormone degrading enzyme        | -0.24 | CACCACTGAATTCATGTAATA  | NM_013381:    | NM_013381:                                                       |
| 29953  | TRHDE                                               | thyrotropin-releasing hormone degrading enzyme        | 0.01  | CCGAATCTATAGAATAAAGTA  | NM_013381:    | NM_013381:                                                       |
| 7201   | TRHR (thyrot thyrotropin-releasing hormone receptor |                                                       | -0.29 | CAGGACTCTAGTGGTGTGCAA  | NM_003301:    | NM_003301:                                                       |
| 7201   | TRHR (thyrot thyrotropin-releasing hormone receptor |                                                       | 0.32  | CTCAATATTAGCACCTACAAA  | NM_003301:    | NM_003301:                                                       |
| 10221  | TRIB1                                               | tribbles homolog 1 (Drosophila)                       | 0.48  | TCAGACTAACTCCAGAATTA   | NM_025195:    | NM_025195:                                                       |
| 10221  | TRIB1                                               | tribbles homolog 1 (Drosophila)                       | 0.05  | CCAGCGAACCTGGAACAGTA   | NM_025195:    | NM_025195:                                                       |
| 28951  | TRIB2                                               | tribbles homolog 2 (Drosophila)                       | -0.07 | CACGTGGACTCTAGTATGATA  | NM_021643:    | NM_021643:                                                       |
| 28951  | TRIB2                                               | tribbles homolog 2 (Drosophila)                       | -1.92 | CAGGTGCCACATGATATA     | NM_021643:    | NM_021643:                                                       |
| 57761  | TRIB3                                               | tribbles homolog 3 (Drosophila)                       | 1.38  | TACCATTGAGTATGATGTTTA  | NM_021158:    | NM_021158:                                                       |
| 57761  | TRIB3                                               | tribbles homolog 3 (Drosophila)                       | 0.35  | ATGAGGCTAGTCTTGTCTTAA  | NM_021158:    | NM_021158:                                                       |
| 10107  | TRIM10                                              | tripartite motif-containing 10                        | 0.71  | CAGTTGTAGACTTTAAACAA   | NM_006778:    | NM_006778:NM_052828:                                             |
| 10107  | TRIM10                                              | tripartite motif-containing 10                        | 0.07  | TCCAATAATGTAGAGTTCAT   | NM_006778:    | NM_006778:NM_052828:                                             |
| 81559  | TRIM11                                              | tripartite motif-containing 11                        | 0.70  | AGAGTAGATGCTCATAATAA   | NM_145214:    | NM_145214:                                                       |
| 81559  | TRIM11                                              | tripartite motif-containing 11                        | 0.33  | CAGAGAGTAGATGCTCATAA   | NM_145214:    | NM_145214:                                                       |
| 9830   | TRIM14                                              | tripartite motif-containing 14                        | 1.43  | AAGCAGAGCTGCGTAAAGTTA  | NM_014788:    | NM_014788:NM_033221:                                             |
| 9830   | TRIM14                                              | tripartite motif-containing 14                        | -4.21 | CAGGTGCCTATCAGTGTGATA  | NM_014788:    | NM_014788:NM_033221:                                             |
| 89870  | TRIM15                                              | tripartite motif-containing 15                        | -0.59 | ATCCGTTGATTTCCACAGGAAA | NM_033229:    | NM_033229:                                                       |
| 89870  | TRIM15                                              | tripartite motif-containing 15                        | -6.71 | CCGGCTTGGAGCCAGGTCAA   | NM_033229:    | NM_033229:                                                       |
| 10626  | TRIM16                                              | tripartite motif-containing 16                        | -1.56 | AGGCAGTGAAGTCTGCTCAA   | NM_006470:    | NM_006470:                                                       |
| 10626  | TRIM16                                              | tripartite motif-containing 16                        | -0.06 | GCCGATCAGGTGAACATCAA   | NM_006470:    | NM_006470:                                                       |
| 51127  | TRIM17                                              | tripartite motif-containing 17                        | -0.04 | CCGGACAGATTGAAGTGCTA   | NM_016102:    | NM_016102:NM_001024940:NM_001024941:                             |
| 51127  | TRIM17                                              | tripartite motif-containing 17                        | -0.22 | CAGGGACAACCTGAGCCGGAAA | NM_016102:    | NM_016102:NM_001024940:NM_001024941:                             |
| 6737   | TRIM21                                              | tripartite motif-containing 21                        | -6.99 | CAGAGACTACCTGGAAATGAA  | NM_003141:    | NM_003141:                                                       |
| 6737   | TRIM21                                              | tripartite motif-containing 21                        | -5.89 | CCGGACGCGCTTCTGCTCAA   | NM_003141:    | NM_003141:                                                       |
| 10346  | TRIM22                                              | tripartite motif-containing 22                        | 0.64  | CAAGAAGTCCATAGTAATTA   | NM_006074:    | NM_006074:                                                       |
| 10346  | TRIM22                                              | tripartite motif-containing 22                        | -0.18 | AAGCTCTATGATCTAAATAA   | NM_006074:    | NM_006074:                                                       |
| 373    | TRIM23                                              | tripartite motif-containing 23                        | 0.26  | CAAGTGTATAGCCGATGCTA   | NM_001656:    | NM_033228:NM_001656:NM_033227:                                   |
| 373    | TRIM23                                              | tripartite motif-containing 23                        | 0.09  | TAGGATGAAGTAAATCTTAA   | NM_001656:    | NM_001656:                                                       |
| 8805   | TRIM24                                              | tripartite motif-containing 24                        | -4.14 | TAGGTGTACTGTACTGAAGAA  | NM_003852:    | NM_015905:NM_003852:                                             |
| 8805   | TRIM24                                              | tripartite motif-containing 24                        | 0.88  | ACGCCAGTTGCTTAAATAA    | NM_003852:    | NM_015905:NM_003852:                                             |
| 7706   | TRIM25                                              | tripartite motif-containing 25                        | 0.91  | CAAGTCCACCTGATGTATAA   | NM_005082:    | NM_005082:                                                       |
| 7706   | TRIM25                                              | tripartite motif-containing 25                        | 1.07  | CAGCAAGTTTGACACCATTTA  | NM_005082:    | NM_005082:                                                       |
| 7726   | TRIM26                                              | tripartite motif-containing 26                        | -1.33 | ACCATTGCTCGAGTGGTTAA   | NM_003449:    | NM_003449:                                                       |
| 7726   | TRIM26                                              | tripartite motif-containing 26                        | 2.04  | ACCGGAGAATTCAGATAA     | NM_003449:    | NM_003449:                                                       |
| 51592  | TRIM33                                              | tripartite motif-containing 33                        | -0.49 | TCCGTTAGTATCGGTACACAA  | NM_015906:    | NM_033020:NM_015906:                                             |
| 51592  | TRIM33                                              | tripartite motif-containing 33                        | -0.53 | CTGGGCAAGAAGTGTAGTCAA  | NM_015906:    | NM_033020:NM_015906:                                             |
| 23087  | TRIM35                                              | tripartite motif-containing 35                        | -0.22 | CGGATAGTTGGTTCCTATA    | NM_015066:    | NM_171982:NM_015066:                                             |
| 23087  | TRIM35                                              | tripartite motif-containing 35                        | -0.69 | CAGGGTCCAGAGTACTTAAA   | NM_015066:    | NM_171982:NM_015066:                                             |
| 55521  | TRIM36                                              | tripartite motif-containing 36                        | 0.43  | AGCGTTAACCTCGTAACATA   | NM_018700:    | NM_018700:                                                       |
| 55521  | TRIM36                                              | tripartite motif-containing 36                        | 0.78  | CCGTGTGGAACCATATTCATA  | NM_018700:    | NM_018700:                                                       |
| 4591   | TRIM37                                              | tripartite motif-containing 37                        | -0.87 | CTGTAGATTAGTGAACAGAAA  | NM_015294:    | NM_015294:                                                       |
| 4591   | TRIM37                                              | tripartite motif-containing 37                        | -1.24 | CTAGAGCTTAGTGTGTTTAA   | NM_015294:    | NM_015294:                                                       |
| 10475  | TRIM38                                              | tripartite motif-containing 38                        | -0.11 | CCGGCCATTTCACAGTTTAA   | NM_006355:    | NM_006355:                                                       |
| 10475  | TRIM38                                              | tripartite motif-containing 38                        | 0.35  | AACCACTGACATGTTGTTTAA  | NM_006355:    | NM_006355:                                                       |
| 56658  | TRIM39                                              | tripartite motif-containing 39                        | -0.99 | AGGGAGAGATTGGACATCAA   | NM_021253:    | NM_021253:NM_172016:                                             |
| 56658  | TRIM39                                              | tripartite motif-containing 39                        | 0.49  | TGGGTAATCTCACAGAAAT    | NM_021253:    | NM_021253:NM_172016:                                             |
| 89122  | TRIM4                                               | tripartite motif-containing 4                         | 0.21  | CCGCAGTATAGGCTTAAGTCA  | NM_033017:    | NM_033017:NM_033091:                                             |
| 89122  | TRIM4                                               | tripartite motif-containing 4                         | 0.88  | CGCCCTATTGTATAAGACAA   | NM_033017:    | NM_033017:NM_033091:                                             |
| 90933  | TRIM41                                              | tripartite motif-containing 41                        | -4.38 | AAGGCGTCTGTGGAAATAA    | NM_033549:    | NM_201627:NM_033549:                                             |
| 90933  | TRIM41                                              | tripartite motif-containing 41                        | 0.48  | AGGGTAGAGCTGGGTAATAA   | NM_033549:    | NM_033549:                                                       |
| 129868 | TRIM43 (tripa tripartite motif-containing 43        |                                                       | -0.86 | CCGGTCTCCATAAGGAAGAA   | NM_138800:    | NM_138800:                                                       |
| 129868 | TRIM43 (tripa tripartite motif-containing 43        |                                                       | -1.12 | CGGGAGAAACTCTTAAAGCAA  | NM_138800:    | NM_138800:                                                       |
| 80128  | TRIM46                                              | tripartite motif-containing 46                        | 0.91  | GTCATGTTTTATAACAATAA   | NM_025058:    | NM_025058:                                                       |
| 80128  | TRIM46                                              | tripartite motif-containing 46                        | -0.68 | CACCACCTGCCTGGCAGCTA   | NM_025058:    | NM_025058:                                                       |
| 91107  | TRIM47                                              | tripartite motif-containing 47                        | 2.34  | CTGCAGCTGTTGGAAACCAA   | NM_033452:    | NM_033452:                                                       |
| 91107  | TRIM47                                              | tripartite motif-containing 47                        | -0.08 | CAGGGACTATTTCCCTCAAGT  | NM_033452:    | NM_033452:                                                       |
| 57093  | TRIM49                                              | tripartite motif-containing 49                        | -0.28 | ATGATATCTTCTGTATGAAA   | NM_020358:    | NM_020358:                                                       |
| 85363  | TRIM5                                               | tripartite motif-containing 5                         | 0.97  | CAGGGTGTGATGGCGTCATA   | NM_033034:    | NM_033092:NM_033093:NM_033034:                                   |
| 85363  | TRIM5                                               | tripartite motif-containing 5                         | 1.80  | TGGGTTATTACCAATGTATA   | NM_033034:    | NM_033093:NM_033034:                                             |
| 135892 | TRIM50A                                             | tripartite motif-containing 50A                       | -0.63 | CAGCCAAAGGGTATTTGTAA   | NM_178125:    | NM_178125:                                                       |
| 135892 | TRIM50A                                             | tripartite motif-containing 50A                       | 1.14  | TCCCTGGAACATGTAATGATA  | NM_178125:    | NM_178125:                                                       |
| 84767  | TRIM51                                              | tripartite motif-containing 51                        | 1.42  | CAGAGTGTGAATGACTTCTA   | NM_032681:    | NM_032681:NM_208060:                                             |
| 25893  | TRIM58                                              | tripartite motif-containing 58                        | -2.82 | CCGGTGAATTTCAATCTACA   | NM_015431:    | NM_015431:                                                       |
| 25893  | TRIM58                                              | tripartite motif-containing 58                        | -0.68 | ATGGAGCAATCTCAACCTCA   | NM_015431:    | NM_015431:                                                       |
| 286827 | TRIM59                                              | tripartite motif-containing 59                        | -0.29 | AACATTACAGGCAACCAITAA  | NM_173084:    | NM_173084:                                                       |
| 286827 | TRIM59                                              | tripartite motif-containing 59                        | 0.34  | CCCGTGAATTTTACTCCTGA   | NM_173084:    | NM_173084:                                                       |
| 117854 | TRIM6                                               | tripartite motif-containing 6                         | -1.75 | TAGGAAGTTCTGATCTGTTAA  | NM_001003818: | NM_001003818:NM_058166:                                          |
| 117854 | TRIM6                                               | tripartite motif-containing 6                         | 1.57  | CTACACTTCTCTAAATATTA   | NM_001003818: | NM_001003818:NM_058166:                                          |
| 166655 | TRIM60                                              | tripartite motif-containing 60                        | 1.14  | CAGATTATGTTCCACATTA    | NM_152620:    | NM_152620:                                                       |
| 166655 | TRIM60                                              | tripartite motif-containing 60                        | -0.07 | CCGTTTGGCCTTATTTCTATA  | NM_152620:    | NM_152620:                                                       |
| 55223  | TRIM62                                              | tripartite motif-containing 62                        | 0.06  | CACCTCAGTTCCCAATCTAAA  | NM_018207:    | NM_018207:                                                       |
| 55223  | TRIM62                                              | tripartite motif-containing 62                        | -1.33 | CCGGAGAAAGTTCCTGGCAA   | NM_018207:    | NM_018207:                                                       |
| 120146 | TRIM64                                              | tripartite motif-containing 64                        | 1.17  | ATGGATGATTGGGCAAGTTA   | XM_061890:    | XM_061890:                                                       |
| 120146 | TRIM64                                              | tripartite motif-containing 64                        | 0.89  | TACTTTCTGTAGTTATCAA    | XM_061890:    | XM_061890:                                                       |

|        |         |                                                                       |       |                        |               |                                                                           |
|--------|---------|-----------------------------------------------------------------------|-------|------------------------|---------------|---------------------------------------------------------------------------|
| 201292 | TRIM65  | tripartite motif-containing 65                                        | 0.57  | ATCAAGTTTATTTATCCATTA  | NM_173547:    | NM_173547:                                                                |
| 201292 | TRIM65  | tripartite motif-containing 65                                        | 0.00  | ATGGATAAATATTTACAAATA  | NM_173547:    | NM_173547:                                                                |
| 440730 | TRIM67  | tripartite motif-containing 67                                        | 0.32  | CACAACATATCTCAGGCCTTAA | NM_001004342: | NM_001004342:                                                             |
| 440730 | TRIM67  | tripartite motif-containing 67                                        | 0.05  | CGGGAAAGTGCTAGCTCGGTAA | NM_001004342: | NM_001004342:                                                             |
| 55128  | TRIM68  | tripartite motif-containing 68                                        | -3.55 | AAGAGAGATCCTGAAGACCTTA | NM_018073:    | NM_018073:                                                                |
| 55128  | TRIM68  | tripartite motif-containing 68                                        | -2.36 | TAGCCAAACTGAGAAATATA   | NM_018073:    | NM_018073:                                                                |
| 81786  | TRIM7   | tripartite motif-containing 7                                         | 0.64  | TGGGAATATTAACAATAAAA   | NM_033342:    | NM_033342:                                                                |
| 81786  | TRIM7   | tripartite motif-containing 7                                         | -0.24 | CGGAAGCATCTTGTAAATGGAA | NM_033342:    | NM_033342:                                                                |
| 114088 | TRIM9   | tripartite motif-containing 9                                         | -0.01 | CAGGGCAACACTAGTTTGATA  | NM_015163:    | NM_015163:                                                                |
| 114088 | TRIM9   | tripartite motif-containing 9                                         | -0.53 | CAGCAGAGCATCAATAGCCCTA | NM_015163:    | NM_015163:                                                                |
| 7204   | TRIO    | triple functional domain (PTPRF interacting)                          | 0.41  | ACCGTTGTTCTTAGATGTCGA  | NM_007118:    | NM_007118:                                                                |
| 7204   | TRIO    | triple functional domain (PTPRF interacting)                          | 0.27  | CGGGAAATGTATGGATACGTA  | NM_007118:    | NM_007118:                                                                |
| 9322   | TRIP10  | thyroid hormone receptor interactor 10                                | -0.30 | ACGGCTAGACCAGGATACAA   | NM_004240:    | NM_004240:                                                                |
| 9322   | TRIP10  | thyroid hormone receptor interactor 10                                | -5.03 | ACGGCTGAAATGGGAAGTCA   | NM_004240:    | NM_004240:                                                                |
| 9321   | TRIP11  | thyroid hormone receptor interactor 11                                | 0.95  | ACCCAGCTTTGTGTTATCGTA  | NM_004239:    | NM_004239:                                                                |
| 9321   | TRIP11  | thyroid hormone receptor interactor 11                                | 0.55  | CAGAATGAGGTTCAACGTTTA  | NM_004239:    | NM_004239:                                                                |
| 9320   | TRIP12  | thyroid hormone receptor interactor 12                                | -0.17 | CACAATTTAGAGGATGATCTA  | XM_376178:    | NM_004238:                                                                |
| 9320   | TRIP12  | thyroid hormone receptor interactor 12                                | 0.94  | CAGATGTTTCATCATTTGAAA  | XM_376178:    | NM_004238:                                                                |
| 9319   | TRIP13  | thyroid hormone receptor interactor 13                                | 0.89  | GAGGATTCACATTAATAATA   | NM_004237:    | NM_004237:                                                                |
| 9319   | TRIP13  | thyroid hormone receptor interactor 13                                | 0.87  | TTGACACAGAAATTAAGGTTA  | NM_004237:    | NM_004237:                                                                |
| 9325   | TRIP4   | thyroid hormone receptor interactor 4                                 | 0.74  | AGGATTTGGACTAGAGTCAA   | NM_016213:    | NM_016213:                                                                |
| 9325   | TRIP4   | thyroid hormone receptor interactor 4                                 | -0.02 | CAGAAATCAGGGCAGCATCTA  | NM_016213:    | NM_016213:                                                                |
| 7205   | TRIP6   | thyroid hormone receptor interactor 6                                 | 0.08  | CACGGGCTCCCTGAAGCCAAA  | NM_003302:    | NM_003302:                                                                |
| 7205   | TRIP6   | thyroid hormone receptor interactor 6                                 | -0.06 | CTGTATGACTTTGTCAACCAA  | NM_003302:    | NM_003302:                                                                |
| 55621  | TRMT1   | TRM1 tRNA methyltransferase 1 homolog (S. cerevisiae)                 | -0.26 | CAGCATCAGCGCTGACTTCTA  | NM_017722:    | NM_017722:                                                                |
| 55621  | TRMT1   | TRM1 tRNA methyltransferase 1 homolog (S. cerevisiae)                 | -3.42 | ACGCCGGAATGCCAGCTCAA   | NM_017722:    | NM_017722:                                                                |
| 8989   | TRPA1   | transient receptor potential cation channel, subfamily A, member 1    | 0.28  | CTGGTTCTAACTTCAATTTA   | NM_007332:    | NM_007332:                                                                |
| 8989   | TRPA1   | transient receptor potential cation channel, subfamily A, member 1    | 0.23  | CACGAATTCATCTAATAAA    | NM_007332:    | NM_007332:                                                                |
| 7220   | TRPC1   | transient receptor potential cation channel, subfamily C, member 1    | 0.87  | TTGGACTTCTAAATATGCTA   | NM_003304:    | NM_003304:                                                                |
| 7220   | TRPC1   | transient receptor potential cation channel, subfamily C, member 1    | -0.02 | TGGGTCATTCACAGATTCAA   | NM_003304:    | NM_003304:                                                                |
| 7222   | TRPC3   | transient receptor potential cation channel, subfamily C, member 3    | 0.13  | TTGGTTTGACTATAGCACAA   | NM_003305:    | NM_003305:                                                                |
| 7222   | TRPC3   | transient receptor potential cation channel, subfamily C, member 3    | 1.08  | CACGTTATCAGCAGATAATGA  | NM_003305:    | NM_003305:                                                                |
| 7223   | TRPC4   | transient receptor potential cation channel, subfamily C, member 4    | -6.62 | AACGAAAGGGTTAACTCGCAA  | NM_016179:    | NM_016179:                                                                |
| 7223   | TRPC4   | transient receptor potential cation channel, subfamily C, member 4    | -1.45 | CGAGTGACAATAGTCTATA    | NM_016179:    | NM_016179:                                                                |
| 26133  | TRPC4AP | transient receptor potential cation channel, subfamily C, member 4 as | -0.47 | CGTGCTGAGTATCCTGTATA   | NM_015638:    | NM_015638;NM_199368:                                                      |
| 26133  | TRPC4AP | transient receptor potential cation channel, subfamily C, member 4 as | -0.82 | AACCACTTATCCAATACTTA   | NM_015638:    | NM_015638;NM_199368:                                                      |
| 7224   | TRPC5   | transient receptor potential cation channel, subfamily C, member 5    | -3.68 | ACCAGCTATCAGATAAGGCCAA | NM_012471:    | NM_012471:                                                                |
| 7224   | TRPC5   | transient receptor potential cation channel, subfamily C, member 5    | 0.85  | CACACTAAGTCCATCTAGCAA  | NM_012471:    | NM_012471:                                                                |
| 7225   | TRPC6   | transient receptor potential cation channel, subfamily C, member 6    | -1.19 | CACCTTAGCCATTAAGATGAAA | NM_004621:    | NM_004621:                                                                |
| 7225   | TRPC6   | transient receptor potential cation channel, subfamily C, member 6    | 0.27  | CCCTATTAGTTTGGGCTAA    | NM_004621:    | NM_004621:                                                                |
| 57113  | TRPC7   | transient receptor potential cation channel, subfamily C, member 7    | -0.15 | CAGGCTTACGCTCAACAGTCTA | NM_020389:    | NM_020389:                                                                |
| 57113  | TRPC7   | transient receptor potential cation channel, subfamily C, member 7    | 0.35  | CGGATCAAACCTGCCATTTAA  | NM_020389:    | NM_020389:                                                                |
| 4308   | TRPM1   | transient receptor potential cation channel, subfamily M, member 1    | 0.76  | CACCATTAGCTCACTTAAGAA  | NM_002420:    | NM_002420:                                                                |
| 4308   | TRPM1   | transient receptor potential cation channel, subfamily M, member 1    | -0.62 | CAAGATTACAATCTCTTTA    | NM_002420:    | NM_002420:                                                                |
| 7226   | TRPM2   | transient receptor potential cation channel, subfamily M, member 2    | -0.71 | CAGGCTATGCTGTGAGGAAA   | NM_003307:    | NM_001001188;NM_003307:                                                   |
| 7226   | TRPM2   | transient receptor potential cation channel, subfamily M, member 2    | -0.02 | CTGAGGAAAGAGCTATAAAGAA | NM_003307:    | NM_001001188;NM_003307:                                                   |
| 80036  | TRPM3   | transient receptor potential cation channel, subfamily M, member 3    | 0.64  | CAAGGTAACAGTCATAGTTCA  | NM_020952:    | NM_024971;NM_206946;NM_206947;NM_206948;NM_206949;NM_001007471;NM_020952; |
| 80036  | TRPM3   | transient receptor potential cation channel, subfamily M, member 3    | -0.11 | ATCATCGTGTATAGACATCTA  | NM_020952:    | NM_024971;NM_206946;NM_206947;NM_206948;NM_206949;NM_001007471;NM_020952; |
| 54795  | TRPM4   | transient receptor potential cation channel, subfamily M, member 4    | -5.21 | AACGTGGGAATCGGTGCATAA  | NM_017636:    | NM_017636:                                                                |
| 54795  | TRPM4   | transient receptor potential cation channel, subfamily M, member 4    | -1.51 | CGGGTTTACCTTTCTAAGGAA  | NM_017636:    | NM_017636:                                                                |
| 29850  | TRPM5   | transient receptor potential cation channel, subfamily M, member 5    | -1.58 | CTGACTTGTGTTCCCTGACAAA | NM_014555:    | NM_014555:                                                                |
| 29850  | TRPM5   | transient receptor potential cation channel, subfamily M, member 5    | -0.96 | CAGAGTGACTTCAATTGCCAAA | NM_014555:    | NM_014555:                                                                |
| 140803 | TRPM6   | transient receptor potential cation channel, subfamily M, member 6    | -4.69 | TTGCCAATTGCCAAACTAAA   | NM_017662:    | NM_017662:                                                                |
| 140803 | TRPM6   | transient receptor potential cation channel, subfamily M, member 6    | -2.05 | GAGCAGAATCCGTCACATTA   | NM_017662:    | NM_017662:                                                                |
| 54822  | TRPM7   | transient receptor potential cation channel, subfamily M, member 7    | -1.45 | CGGGAGGAAATGTTGGTAA    | NM_017672:    | NM_017672:                                                                |
| 54822  | TRPM7   | transient receptor potential cation channel, subfamily M, member 7    | -2.14 | CTGGTTTAAACCACTTGGCATA | NM_017672:    | NM_017672:                                                                |
| 79054  | TRPM8   | transient receptor potential cation channel, subfamily M, member 8    | 0.96  | AAGTTAGATTCCAATAAATA   | NM_024080:    | NM_024080:                                                                |
| 79054  | TRPM8   | transient receptor potential cation channel, subfamily M, member 8    | -2.76 | CAGAATGTTATCACTACTACAT | NM_024080:    | NM_024080:                                                                |
| 7227   | TRPS1   | trichorhinophalangeal syndrome I                                      | 0.81  | CACGATAGATCTATTCCTATA  | NM_014112:    | NM_014112:                                                                |
| 7227   | TRPS1   | trichorhinophalangeal syndrome I                                      | 0.49  | GAGGGTGTCTTGACGATTA    | NM_014112:    | NM_014112:                                                                |
| 7227   | TRPS1   | trichorhinophalangeal syndrome I                                      | 0.24  | AGGGTACCACCTTATCTTCAA  | NM_015270:    | NM_014112:                                                                |
| 7442   | TRPV1   | transient receptor potential cation channel, subfamily V, member 1    | -0.21 | CCCGAGGAAGTTATCTGCGCA  | NM_018727:    | NM_080705;NM_080704;NM_018727;NM_080706;                                  |
| 7442   | TRPV1   | transient receptor potential cation channel, subfamily V, member 1    | 0.51  | CTCAATTCGCTGACAGTTAA   | NM_018727:    | NM_080705;NM_080704;NM_018727;NM_080706;                                  |
| 51393  | TRPV2   | transient receptor potential cation channel, subfamily V, member 2    | -0.08 | CCAGTGAATTCGTTGGCCAAA  | NM_016113:    | NM_016113:                                                                |
| 51393  | TRPV2   | transient receptor potential cation channel, subfamily V, member 2    | -0.29 | CAGAGGATCTTCCAACACACA  | NM_016113:    | NM_016113:                                                                |
| 162514 | TRPV3   | transient receptor potential cation channel, subfamily V, member 3    | 0.43  | CCCGAAACCTCGGTGTAGAAA  | NM_145068:    | NM_145068:                                                                |
| 162514 | TRPV3   | transient receptor potential cation channel, subfamily V, member 3    | -1.21 | CACGTCCTCCTCCTAACGAAA  | NM_145068:    | NM_145068:                                                                |
| 59341  | TRPV4   | transient receptor potential cation channel, subfamily V, member 4    | -1.50 | CTGGATTTGGCGGTGCTCAA   | NM_147204:    | NM_021625;NM_147204;                                                      |
| 59341  | TRPV4   | transient receptor potential cation channel, subfamily V, member 4    | -2.31 | CTGGAGTGAATTCCTCTCTTCA | NM_147204:    | NM_021625;NM_147204;                                                      |
| 56302  | TRPV5   | transient receptor potential cation channel, subfamily V, member 5    | -3.35 | CAGGAGCATCCATCTGAGAAA  | NM_019841:    | NM_019841:                                                                |
| 55503  | TRPV6   | transient receptor potential cation channel, subfamily V, member 6    | -0.68 | CTGCATGTGACAGCACTTTAA  | NM_018646:    | NM_018646:                                                                |
| 55503  | TRPV6   | transient receptor potential cation channel, subfamily V, member 6    | -0.37 | GAGGAGTAGCATGAACGCCAA  | NM_018646:    | NM_018646:                                                                |
| 8295   | TRRAP   | transformation/transcription domain-associated protein                | -0.64 | CAGACCTTTGTAAACAGTGTA  | NM_003496:    | NM_003496:                                                                |
| 8295   | TRRAP   | transformation/transcription domain-associated protein                | 1.51  | ATCGAGGAAATCTTAGCCCAA  | NM_003496:    | NM_003496:                                                                |
| 136541 | TRY1    | trypsin X3                                                            | -1.79 | TAGAGATACATGAACCTCAA   | NM_001001317: | NM_001001317:                                                             |
| 136541 | TRY1    | trypsin X3                                                            | -1.56 | CAGGAGGCGTCTGTAGAGATA  | NM_001001317: | NM_001001317:                                                             |
| 7249   | TSC2    | tuberous sclerosis 2                                                  | -0.37 | TGGCACATGACATCATGCAA   | NM_000548:    | NM_021056;NM_000548;NM_021055;                                            |
| 7249   | TSC2    | tuberous sclerosis 2                                                  | 0.44  | AGCATTAATCTCTTACCATAA  | NM_000548:    | NM_021056;NM_000548;NM_021055;                                            |
| 7251   | TSG101  | tumor susceptibility gene 101                                         | -2.85 | ACCCGTTTGTAGTCAAGAAATA | NM_006292:    | NM_006292:                                                                |
| 7251   | TSG101  | tumor susceptibility gene 101                                         | -4.29 | CAGCTGAGGGCACAATGCGAA  | NM_006292:    | NM_006292:                                                                |
| 95681  | TSGA14  | testis specific, 14                                                   | 1.17  | TCAGACAACITGGAGTATTA   | NM_018718:    | NM_018718:                                                                |
| 95681  | TSGA14  | testis specific, 14                                                   | 0.05  | CAGTATTAGCTTAATTGAGTA  | NM_018718:    | NM_018718:                                                                |
| 7252   | TSHB    | thyroid stimulating hormone, beta                                     | 0.75  | AAGACAACTACTGTACCCAAA  | NM_000549:    | NM_000549:                                                                |
| 7252   | TSHB    | thyroid stimulating hormone, beta                                     | -0.66 | CTGCATACATGAAGCCATCAA  | NM_000549:    | NM_000549:                                                                |
| 7253   | TSHR    | thyroid stimulating hormone receptor                                  | -1.43 | AGCACTGATATTCAGGTTCAA  | NM_000369:    | NM_000369:                                                                |
| 7253   | TSHR    | thyroid stimulating hormone receptor                                  | -0.15 | TACCGAGCTGTGAAGCTTAA   | NM_000369:    | NM_000369;NM_001018036;                                                   |
| 60385  | TSKS    | testis-specific kinase substrate                                      | -0.97 | AACCACGCTCTGAAGCAGAAA  | NM_021733:    | NM_021733:                                                                |
| 60385  | TSKS    | testis-specific kinase substrate                                      | -3.95 | CACCACGCTGTCACTGCTCAA  | NM_021733:    | NM_021733:                                                                |
| 85480  | TSLP    | thymic stromal lymphopoietin                                          | -0.06 | CTGGAACAAGTGTCAACATTA  | NM_033035:    | NM_138551;NM_033035;                                                      |
| 85480  | TSLP    | thymic stromal lymphopoietin                                          | 2.81  | AGCACCTTAACTTACATTTAA  | NM_033035:    | NM_138551;NM_033035;                                                      |
| 203062 | TSNARE1 | t-SNARE domain containing 1                                           | 0.68  | CGCGAGCTGTGGACCTGAAA   | NM_145003:    | NM_145003;                                                                |
| 203062 | TSNARE1 | t-SNARE domain containing 1                                           | -0.24 | CCAGCTGAGCACCCGAATAAA  | NM_145003:    | NM_145003;                                                                |
| 29122  | TSP50   | testes-specific protease 50                                           | 1.57  | GAGGTGCTCAATTAACATTA   | NM_013270:    | NM_013270;                                                                |
| 29122  | TSP50   | testes-specific protease 50                                           | -0.27 | CAGGGAGAAGTCTGCTATGA   | NM_013270:    | NM_013270;                                                                |
| 27075  | TSPAN13 | tetraspanin 13                                                        | 1.34  | CTCCATAAATTTGAAATTTGAA | NM_014399:    | NM_014399;                                                                |

|        |         |                                                                            |       |                        |            |            |
|--------|---------|----------------------------------------------------------------------------|-------|------------------------|------------|------------|
| 27075  | TSPAN13 | tetraspanin 13                                                             | 1.70  | CAGGAAGTATATCTATATGAT  | NM_014399: | NM_014399: |
| 6302   | TSPAN31 | tetraspanin 31                                                             | -0.31 | CTGGCTATTAAACCAGCAAA   | NM_005981: | NM_005981: |
| 6302   | TSPAN31 | tetraspanin 31                                                             | -1.15 | CTGGTGGCTCTAAGGGTAA    | NM_005981: | NM_005981: |
| 7102   | TSPAN7  | tetraspanin 7                                                              | -1.98 | CAGGCTGCCTAAGACATGTAA  | NM_004615: | NM_004615: |
| 7102   | TSPAN7  | tetraspanin 7                                                              | 0.39  | CCGGTTCATCACGCCAATCA   | NM_004615: | NM_004615: |
| 64061  | TSPYL2  | TSPY-like 2                                                                | 1.12  | CACAACATGGTGATTGTCAA   | NM_022117: | NM_022117: |
| 64061  | TSPYL2  | TSPY-like 2                                                                | -0.46 | CCAGAGGTAGTTGACCCGAA   | NM_022117: | NM_022117: |
| 7260   | TSSC1   | (tumo tumor suppressing subtransferable candidate 1                        | 1.12  | CGCAGTCTCTAAATATGATA   | NM_003310: | NM_003310: |
| 7260   | TSSC1   | (tumo tumor suppressing subtransferable candidate 1                        | 0.15  | CGGGTGAATCTGGCATATTA   | NM_003310: | NM_003310: |
| 10078  | TSSC4   | (tumo tumor suppressing subtransferable candidate 4                        | -1.23 | CCGGTGGTGGTGAAGTGGAA   | NM_005706: | NM_005706: |
| 10078  | TSSC4   | (tumo tumor suppressing subtransferable candidate 4                        | 1.04  | CCGCTTGGCTGCCAATCACA   | NM_005706: | NM_005706: |
| 83942  | TSSK1   | testis-specific serine kinase 1                                            | -0.03 | CCAGCTTTCCTGGCCATCAA   | NM_032028: | NM_032028: |
| 83942  | TSSK1   | testis-specific serine kinase 1                                            | 0.87  | TAGAAGCTGATTTAACACCAA  | NM_032028: | NM_032028: |
| 23617  | TSSK2   | testis-specific serine kinase 2                                            | -0.25 | CAAGTTCATGTGGCTGTCAA   | NM_053006: | NM_053006: |
| 23617  | TSSK2   | testis-specific serine kinase 2                                            | 0.98  | GTCGGCCTCACGTAACATA    | NM_053006: | NM_053006: |
| 23617  | TSSK2   | testis-specific serine kinase 2                                            | 0.07  | GCACAAGGACTTCAACATCAA  | NM_053006: | NM_053006: |
| 81629  | TSSK3   | testis-specific serine kinase 3                                            | 1.49  | ATGGCAAGTGTCTCCAATAA   | NM_052841: | NM_052841: |
| 81629  | TSSK3   | testis-specific serine kinase 3                                            | 0.90  | TGGCAAGTGTCTCCAATAA    | NM_052841: | NM_052841: |
| 283629 | TSSK4   | testis-specific serine kinase 4                                            | -2.48 | CAGGTGGTGTATGCTCTGAA   | NM_174944: | NM_174944: |
| 283629 | TSSK4   | testis-specific serine kinase 4                                            | -1.85 | COGTGAATACAGGTAATGAA   | NM_174944: | NM_174944: |
| 83983  | TSSK6   | testis-specific serine kinase 6                                            | 1.30  | ATCGAGGTGTGCAACGGGAAA  | NM_032037: | NM_032037: |
| 83983  | TSSK6   | testis-specific serine kinase 6                                            | -0.30 | CCGGTGGAACTGCAATAAAA   | NM_032037: | NM_032037: |
| 7263   | TST     | thiosulfate sulfurtransferase (rhodanese)                                  | -1.27 | CTGGTGGATTCAGAGTCTCAA  | NM_003312: | NM_003312: |
| 7263   | TST     | thiosulfate sulfurtransferase (rhodanese)                                  | -2.36 | CCGACCCGATTCAGTGTCTCAA | NM_003312: | NM_003312: |
| 7264   | TSTA3   | tissue specific transplantation antigen P35B                               | -0.50 | CAAGTCGAGTGGGAGTTTAA   | NM_003313: | NM_003313: |
| 7264   | TSTA3   | tissue specific transplantation antigen P35B                               | 0.08  | TCCGCGAGGCGAGTTCATATA  | NM_003313: | NM_003313: |
| 84630  | TTBK1   | tau tubulin kinase 1                                                       | 0.12  | CAGGAACGAGAAGTTAACTAA  | NM_166453: | NM_166453: |
| 84630  | TTBK1   | tau tubulin kinase 1                                                       | 0.02  | TGGCAGGAACGAGAAGTTTAA  | NM_166453: | NM_166453: |
| 146057 | TTBK2   | tau tubulin kinase 2                                                       | -4.13 | ACGGCCAGGTTAAATGGAAA   | NM_173500: | NM_173500: |
| 146057 | TTBK2   | tau tubulin kinase 2                                                       | 0.46  | CACATTGGTCTATGACATGTTA | NM_173500: | NM_173500: |
| 7267   | TTC3    | tetratricopeptide repeat domain 3                                          | -2.00 | ATCCATAAGAATTGAGCGCTA  | NM_003316: | NM_003316: |
| 7267   | TTC3    | tetratricopeptide repeat domain 3                                          | -0.52 | CACGCTTAGTTTGAACAGAA   | NM_003316: | NM_003316: |
| 7272   | TTK     | TTK protein kinase                                                         | -1.12 | CAGCAATACCTTGATGATTA   | NM_003318: | NM_003318: |
| 7272   | TTK     | TTK protein kinase                                                         | -0.28 | TCCGACTTATGATTATGAAA   | NM_003318: | NM_003318: |
| 150465 | TTL     | tubulin tyrosine ligase                                                    | 0.62  | CGCGACTGCCTAGAACTATA   | NM_003318: | NM_003318: |
| 7273   | TTN     | titin                                                                      | 0.06  | ATCGACTATTACATCGTAGAA  | NM_003319: | NM_133437: |
| 7273   | TTN     | titin                                                                      | 0.26  | CGCATTCTAGCTCGAGTCAAA  | NM_003319: | NM_133437: |
| 7274   | TTPA    | tocopherol (alpha) transfer protein (ataxia (Friedreich-like) with vitamir | 0.20  | ACGGATTACATGCATGGGAA   | NM_000370: | NM_000370: |
| 7274   | TTPA    | tocopherol (alpha) transfer protein (ataxia (Friedreich-like) with vitamir | 0.36  | ACGGATTACATGCATGGGAA   | NM_000370: | NM_000370: |
| 51567  | TTRAP   | TRAF and TNF receptor associated protein                                   | 1.10  | ACCGAAATAGTAAATTTTGA   | NM_016614: | NM_016614: |
| 51567  | TTRAP   | TRAF and TNF receptor associated protein                                   | 0.58  | CGGAACGAATGAATCAGTTAA  | NM_016614: | NM_016614: |
| 7277   | TUBA1   | tubulin, alpha 1 (testis specific)                                         | 0.27  | AACAGTTCCTTGACACGGTTA  | NM_006000: | NM_006000: |
| 7277   | TUBA1   | tubulin, alpha 1 (testis specific)                                         | -0.08 | GAGGATGAGGGAGAAGAATAA  | NM_006000: | NM_006000: |
| 7278   | TUBA2   | tubulin, alpha 2                                                           | -5.53 | CCCGCTCATCTCAGCCGAGAAA | NM_006001: | NM_006001: |
| 7278   | TUBA2   | tubulin, alpha 2                                                           | 1.62  | TTCAGTCTTTGCAATTTAAA   | NM_006001: | NM_006001: |
| 7846   | TUBA3   | tubulin, alpha 3                                                           | -0.72 | CCGCTTAAGAGTCCGCGTGTGA | NM_006009: | NM_006009: |
| 7846   | TUBA3   | tubulin, alpha 3                                                           | 0.96  | CTGAATAGGTTAATAGGTCAA  | NM_006009: | NM_006009: |
| 80086  | TUBA4   | tubulin, alpha 4                                                           | -2.41 | CTGTGTGTCTGCTCAGTATAA  | NM_025019: | NM_025019: |
| 80086  | TUBA4   | tubulin, alpha 4                                                           | 1.15  | AGGCTTAAAGGTTGATATCAA  | NM_025019: | NM_025019: |
| 51807  | TUBA8   | tubulin, alpha 8                                                           | 0.40  | TCCGGGATCATCTAGACTTAA  | NM_018943: | NM_018943: |
| 51807  | TUBA8   | tubulin, alpha 8                                                           | 1.67  | GAGCAGGTTTGTGCTACATAA  | NM_018943: | NM_018943: |
| 79861  | TUBAL3  | tubulin, alpha-like 3                                                      | 0.39  | ACAGCACATGTGTATTACGAAA | NM_024803: | NM_024803: |
| 79861  | TUBAL3  | tubulin, alpha-like 3                                                      | -2.67 | CTGCCGTGTAGAGCCCTTATA  | NM_024803: | NM_024803: |
| 203068 | TUBB    | tubulin, beta                                                              | -4.38 | CAGCAAGATCCGGAAGAATAA  | NM_047083: | NM_178014: |
| 203068 | TUBB    | tubulin, beta                                                              | 0.08  | CAGTTAACTCTCTCTTAAA    | NM_178014: | NM_178014: |
| 203068 | TUBB    | tubulin, beta                                                              | -0.37 | CTCCAGAAACGCTCTCTTAAAT | NM_178014: | NM_178014: |
| 81027  | TUBB1   | tubulin, beta 1                                                            | 0.39  | TCCGAGTACCAACAATTTCAA  | NM_030773: | NM_030773: |
| 81027  | TUBB1   | tubulin, beta 1                                                            | -3.51 | CAGCGAAGGGATGGACATAAA  | NM_030773: | NM_030773: |
| 7280   | TUBB2A  | tubulin, beta 2A                                                           | 0.38  | GAAGGTATCTATACTAATAAAA | NM_001069: | NM_001069: |
| 7280   | TUBB2A  | tubulin, beta 2A                                                           | -3.28 | CTGTGAAGGTATCTACTACTAA | NM_001069: | NM_001069: |
| 347733 | TUBB2B  | tubulin, beta 2B                                                           | 0.00  | ACAGTTAAGATGAGAGATCAA  | NM_178012: | NM_178012: |
| 347733 | TUBB2B  | tubulin, beta 2B                                                           | 1.22  | CAGGCAGATGGATTCGGTTA   | NM_178012: | NM_178012: |
| 10381  | TUBB3   | tubulin, beta 3                                                            | 0.36  | TTGCTGTCAAGTACCCCTTAAA | NM_006086: | NM_006086: |
| 10381  | TUBB3   | tubulin, beta 3                                                            | -1.19 | GGGATGAGGATGACTACTACAA | NM_006086: | NM_006086: |
| 10382  | TUBB4   | tubulin, beta 4                                                            | -0.28 | CTGACCTTGCCTCACCTTAAA  | NM_006087: | NM_006087: |
| 10382  | TUBB4   | tubulin, beta 4                                                            | -0.04 | CTGCCTCACCTCAATAAATA   | NM_006087: | NM_006087: |
| 56604  | TUBB4Q  | (tubulin, beta polypeptide 4, member Q                                     | -2.48 | CACAGCCGTCAGGAACCTCAA  | NM_020040: | NM_020040: |
| 84617  | TUBB6   | tubulin, beta 6                                                            | -2.14 | CAGTATGGAGCTTTGAAATAA  | NM_032525: | NM_032525: |
| 84617  | TUBB6   | tubulin, beta 6                                                            | 1.72  | CCGTGTGCTCTATATGAATAA  | NM_032525: | NM_032525: |
| 347688 | TUBB8   | tubulin, beta 8                                                            | 0.44  | CTGGTGTCTGAATATCAGCAA  | NM_371207: | NM_371207: |
| 51174  | TUBD1   | tubulin, delta 1                                                           | 0.34  | CAACAGCCAGTCTTAGTAAAA  | NM_016261: | NM_016261: |
| 51174  | TUBD1   | tubulin, delta 1                                                           | -0.15 | TTGGTCACTTCTCGTGGGAAA  | NM_016261: | NM_016261: |
| 51175  | TUBE1   | tubulin, epsilon 1                                                         | 0.06  | TAGTGAATCTTAGTACCTTA   | NM_016262: | NM_016262: |
| 51175  | TUBE1   | tubulin, epsilon 1                                                         | 0.64  | CAAGATTTGAAGGTCCCTTA   | NM_016262: | NM_016262: |
| 7283   | TUBG1   | tubulin, gamma 1                                                           | -0.07 | CCGAGGGAAATCATCACCCCTA | NM_001070: | NM_001070: |
| 7283   | TUBG1   | tubulin, gamma 1                                                           | -0.13 | CTCCTCTTATGAGACTATTTA  | NM_001070: | NM_001070: |
| 27175  | TUBG2   | tubulin, gamma 2                                                           | 0.68  | AAGCTTGGTGTGAGTATAAA   | NM_016437: | NM_016437: |
| 27175  | TUBG2   | tubulin, gamma 2                                                           | -2.48 | CCGGAGATCATCACCCCTGCA  | NM_016437: | NM_016437: |
| 10844  | TUBGCP2 | tubulin, gamma complex associated protein 2                                | -4.91 | CAGCGTCTGGATCAGCAACAA  | NM_006659: | NM_006659: |
| 10844  | TUBGCP2 | tubulin, gamma complex associated protein 2                                | 1.20  | CCAGGAGGATACAAACGACAA  | NM_006659: | NM_006659: |
| 10426  | TUBGCP3 | tubulin, gamma complex associated protein 3                                | -0.25 | TACCGCAATGCATCAGCTAA   | NM_006322: | NM_006322: |
| 10426  | TUBGCP3 | tubulin, gamma complex associated protein 3                                | -1.55 | TACGACTTTGATCAGCATATA  | NM_006322: | NM_006322: |
| 85378  | TUBGCP6 | tubulin, gamma complex associated protein 6                                | -5.67 | CGGCATCAACTTCAACAACATA | NM_020461: | NM_020461: |
| 85378  | TUBGCP6 | tubulin, gamma complex associated protein 6                                | -4.50 | CCACATCTCCTGGTGAACAAA  | NM_020461: | NM_020461: |
| 7287   | TULP1   | tubby like protein 1                                                       | -2.13 | CCGGCGCATGACCGTCAATCAT | NM_003322: | NM_003322: |
| 7287   | TULP1   | tubby like protein 1                                                       | 1.11  | CCGCTTACCGGCTTTGACAAA  | NM_003322: | NM_003322: |
| 7289   | TULP3   | tubby like protein 3                                                       | 0.88  | AGGACTGACAGTAATGTGATA  | NM_003324: | NM_003324: |
| 7289   | TULP3   | tubby like protein 3                                                       | 0.95  | ATGGGTGAGAGATGATTTAAA  | NM_003324: | NM_003324: |
| 56995  | TULP4   | tubby like protein 4                                                       | -0.17 | ATGCTTACTGTAACATGAT    | NM_020245: | NM_020245: |
| 56995  | TULP4   | tubby like protein 4                                                       | -0.38 | CACACTGTGTGGACCAACAA   | NM_020245: | NM_020245: |
| 11334  | TUSC2   | tumor suppressor candidate 2                                               | -4.85 | CAAGCTGAGGCGAGTGCATAA  | NM_007275: | NM_007275: |
| 11334  | TUSC2   | tumor suppressor candidate 2                                               | -0.52 | CCGGCGCTCTATGTCTATGAA  | NM_007275: | NM_007275: |
| 7991   | TUSC3   | tumor suppressor candidate 3                                               | 0.19  | ATGGTAGCATTTAGTAATCTA  | NM_006765: | NM_006765: |
| 7991   | TUSC3   | tumor suppressor candidate 3                                               | 0.36  | CAGGATTTGAAATAAATGACAA | NM_006765: | NM_006765: |
| 10641  | TUSC4   | tumor suppressor candidate 4                                               | 0.09  | CCGGATGTGTTCCAGCTATA   | NM_006545: | NM_006545: |
| 10641  | TUSC4   | tumor suppressor candidate 4                                               | 1.13  | CGCCCTCGAGCCCATTTGTTAA | NM_006545: | NM_006545: |
| 7291   | TWIST1  | twist homolog 1 (acrocephalosyndactyly 3; Saethre-Chotzen syndrom          | -2.08 | TGGGATCAAACCTGGCCGCAAA | NM_000474: | NM_000474: |

|        |         |                                                                     |        |                         |               |                                          |
|--------|---------|---------------------------------------------------------------------|--------|-------------------------|---------------|------------------------------------------|
| 7291   | TWIST1  | twist homolog 1 (acrocephalosyndactyly 3; Saethre-Chotzen syndrome) | 1.51   | AAGAACACCTTTGAAATAAAA   | NM_000474:    | NM_000474:                               |
| 117581 | TWIST2  | twist homolog 2 (Drosophila)                                        | 0.95   | CTGCATGATTGTTTCAAGTCA   | NM_057179:    | NM_057179:                               |
| 117581 | TWIST2  | twist homolog 2 (Drosophila)                                        | -0.04  | CAGAAATGCATCTTGTAGACA   | NM_057179:    | NM_057179:                               |
| 7294   | TKX     | TKX tyrosine kinase                                                 | 0.24   | CAGCTGGGTTTAGCTACGAAA   | NM_003328:    | NM_003328:                               |
| 7294   | TKX     | TKX tyrosine kinase                                                 | -1.12  | CCGGTGACATTCATTTCCCA    | NM_003328:    | NM_003328:                               |
| 200081 | TXLNA   | taxilin alpha                                                       | 0.17   | CCGGACCTATGGCCAAGGAA    | NM_175852:    | NM_175852:                               |
| 200081 | TXLNA   | taxilin alpha                                                       | -0.05  | CTGGTGATCCTTCACATCTA    | NM_175852:    | NM_175852:                               |
| 7295   | TXN     | thioredoxin                                                         | 0.76   | CACCATTAAATGAATAGTCTA   | NM_003329:    | NM_003329:                               |
| 7295   | TXN     | thioredoxin                                                         | 0.54   | AACCAGCCATTGGCTATTTAA   | NM_003329:    | NM_003329:                               |
| 25828  | TXN2    | thioredoxin 2                                                       | -0.21  | CCCAAACCTAGTGAGAGTAATA  | NM_012473:    | NM_012473:                               |
| 25828  | TXN2    | thioredoxin 2                                                       | 0.03   | CGGGAAGGTGGTGATGGCCAA   | NM_012473:    | NM_012473:                               |
| 81542  | TXNDC   | thioredoxin domain containing                                       | 0.77   | TAGATTTACAGTATCGTAATA   | NM_030755:    | NM_030755:                               |
| 81542  | TXNDC   | thioredoxin domain containing                                       | 1.06   | ATGGTAATACAGGATATGCTA   | NM_030755:    | NM_030755:                               |
| 54495  | TXNDC10 | thioredoxin domain containing 10                                    | 1.16   | TAGGATTAAGACATCAAT      | NM_019022:    | NM_019022:                               |
| 54495  | TXNDC10 | thioredoxin domain containing 10                                    | -0.07  | ATGCTGTTAATTAACAAGTA    | NM_019022:    | NM_019022:                               |
| 51061  | TXNDC11 | thioredoxin domain containing 11                                    | -1.07  | GCGGCAATTGTGACGTGAAA    | NM_015914:    | NM_015914:                               |
| 51061  | TXNDC11 | thioredoxin domain containing 11                                    | -0.54  | TGGGCAATTGTGACGTGAA     | NM_015914:    | NM_015914:                               |
| 51060  | TXNDC12 | thioredoxin domain containing 12 (endoplasmic reticulum)            | 1.50   | AAGTGAATAACAGTATTCTA    | NM_015913:    | NM_015913:                               |
| 51060  | TXNDC12 | thioredoxin domain containing 12 (endoplasmic reticulum)            | -0.86  | AACAATTAAGCCGACCGAGAA   | NM_015913:    | NM_015913:                               |
| 56255  | TXNDC13 | thioredoxin domain containing 13                                    | -0.09  | CTCCAGTACCTGAAAAGTGAAA  | NM_021156:    | NM_021156:                               |
| 56255  | TXNDC13 | thioredoxin domain containing 13                                    | 1.44   | CTGGGCTTGAACACTCTTTAA   | NM_021156:    | NM_021156:                               |
| 51075  | TXNDC14 | thioredoxin domain containing 14                                    | -0.01  | TTGCTTTATGGTCTTCTATA    | NM_015959:    | NM_015959:                               |
| 51075  | TXNDC14 | thioredoxin domain containing 14                                    | 0.52   | CTAGATTTAACCCCTAAGGTAA  | NM_015959:    | NM_015959:                               |
| 84203  | TXNDC2  | thioredoxin domain containing 2 (spermatozoa)                       | 0.61   | CAGAATTAAGTAAACATGTA    | NM_032243:    | NM_032243:                               |
| 84203  | TXNDC2  | thioredoxin domain containing 2 (spermatozoa)                       | 0.37   | AGCAGTCAATGCAGAAATAAA   | NM_032243:    | NM_032243:                               |
| 51314  | TXNDC3  | thioredoxin domain containing 3 (spermatozoa)                       | -1.21  | CACGTCATATACAAACGATT    | NM_016616:    | NM_016616:                               |
| 51314  | TXNDC3  | thioredoxin domain containing 3 (spermatozoa)                       | 0.61   | CAGCTAATGTGCTAAGTCAA    | NM_016616:    | NM_016616:                               |
| 23071  | TXNDC4  | thioredoxin domain containing 4 (endoplasmic reticulum)             | 0.99   | CACCATCAGGCGTTTATTTAA   | NM_015051:    | NM_015051:                               |
| 23071  | TXNDC4  | thioredoxin domain containing 4 (endoplasmic reticulum)             | 1.55   | TTGAGAGTAGTATTATGAAA    | NM_015051:    | NM_015051:                               |
| 81567  | TXNDC5  | thioredoxin domain containing 5                                     | 0.67   | ATGAGCTACTTCCATAATA     | NM_022085:    | NM_030810.NM_022085:                     |
| 81567  | TXNDC5  | thioredoxin domain containing 5                                     | -0.15  | CACATACAGGCTTAAGCTCTA   | NM_022085:    | NM_030810.NM_022085:                     |
| 347736 | TXNDC6  | thioredoxin domain containing 6                                     | -0.33  | CTCCATCTCTATATATAACA    | NM_178130:    | NM_178130:                               |
| 347736 | TXNDC6  | thioredoxin domain containing 6                                     | 1.85   | TACTCTGATTGCTCAATAAAA   | NM_178130:    | NM_178130:                               |
| 255220 | TXNDC8  | thioredoxin domain containing 8                                     | 0.80   | AACCTATTCTCAAGAACTCAA   | NM_001003936: | NM_001003936:                            |
| 255220 | TXNDC8  | thioredoxin domain containing 8                                     | 1.12   | TGCGAGCACTGTAATCAATA    | NM_001003936: | NM_001003936:                            |
| 10190  | TXNDC9  | thioredoxin domain containing 9                                     | 0.17   | TACAGTTGATCACATCGAAA    | NM_005783:    | NM_005783:                               |
| 10190  | TXNDC9  | thioredoxin domain containing 9                                     | 0.38   | AGCCACCAATTTTCAGAACCAA  | NM_005783:    | NM_005783:                               |
| 10628  | TXNIP   | thioredoxin interacting protein                                     | 1.16   | AAGAGCCAATTTAAACAACCTA  | NM_006472:    | NM_006472:                               |
| 10628  | TXNIP   | thioredoxin interacting protein                                     | -0.81  | AAGAATACCTTAATTCCTTAA   | NM_006472:    | NM_006472:                               |
| 9352   | TXNL1   | thioredoxin-like 1                                                  | 1.03   | ACAGAGGATGATATTAAGGAA   | NM_004786:    | NM_004786:                               |
| 9352   | TXNL1   | thioredoxin-like 1                                                  | 1.16   | CTGACAGAGGATGATATTAATA  | NM_004786:    | NM_004786:                               |
| 10539  | TXNL2   | thioredoxin-like 2                                                  | 0.05   | TACCCTCAGCTGTATGTGAAA   | NM_006541:    | NM_006541:                               |
| 10539  | TXNL2   | thioredoxin-like 2                                                  | 0.90   | TTGATATATTGGAGGATGAA    | NM_006541:    | NM_006541:                               |
| 10907  | TXNL4A  | thioredoxin-like 4A                                                 | -0.19  | AAGGTTACTCTGGTTATAAAA   | NM_006701:    | XM_499552.NM_006701:                     |
| 10907  | TXNL4A  | thioredoxin-like 4A                                                 | 0.16   | TGGCTAATCTTAATAATAATA   | NM_006701:    | XM_499552.NM_006701:                     |
| 54957  | TXNL4B  | thioredoxin-like 4B                                                 | 0.19   | TGATATGCTAAGAAAGAACAA   | NM_017853:    | NM_017853:                               |
| 54957  | TXNL4B  | thioredoxin-like 4B                                                 | -1.02  | CTGCTGGTGGTTATGAAACA    | NM_017853:    | NM_017853:                               |
| 84817  | TXNL5   | thioredoxin-like 5                                                  | 1.66   | AAACAATAGAGCTATTTAAA    | NM_032731:    | NM_032731:                               |
| 84817  | TXNL5   | thioredoxin-like 5                                                  | 0.48   | CTGGCATGTGCTAAACAATA    | NM_032731:    | NM_032731:                               |
| 115861 | TXNL6   | thioredoxin-like 6                                                  | 0.15   | CTCAAGGACATGCCAAAGAAA   | NM_138454:    | NM_138454:                               |
| 115861 | TXNL6   | thioredoxin-like 6                                                  | -0.70  | AGCCAGAGGTTGAGATCAAA    | NM_138454:    | NM_138454:                               |
| 7296   | TXNRD1  | thioredoxin reductase 1                                             | 1.41   | TGCTGGCATTGGTAGTATA     | NM_003330:    | NM_003330.NM_182743.NM_182742.NM_182729: |
| 7296   | TXNRD1  | thioredoxin reductase 1                                             | -1.75  | CGACTCAGAGTAGTAGCTCA    | NM_003330:    | NM_003330.NM_182743.NM_182742.NM_182729: |
| 10587  | TXNRD2  | thioredoxin reductase 2                                             | 0.24   | AACCGAGCGAAGTTACTCAA    | NM_006440:    | NM_145747.NM_006440.NM_145748:           |
| 10587  | TXNRD2  | thioredoxin reductase 2                                             | -1.83  | CAGGAGCATGTGAGGCTCTAT   | NM_006440:    | NM_145747.NM_006440.NM_145748:           |
| 7297   | TYK2    | tyrosine kinase 2                                                   | 0.0038 | CACCATCTGGTAAATAAATCA   | NM_003331:    | NM_003331:                               |
| 7297   | TYK2    | tyrosine kinase 2                                                   | -0.33  | CGGTCTGTGCTGAATGTGTA    | NM_003331:    | NM_003331:                               |
| 7298   | TYMS    | thymidylate synthetase                                              | -0.88  | AAGGATGTTGCCACTGGCCAAA  | NM_001071:    | NM_001071:                               |
| 7298   | TYMS    | thymidylate synthetase                                              | -1.59  | CCGTGACCTATCAGTATTATA   | NM_001071:    | NM_001071:                               |
| 7301   | TYRO3   | TYRO3 protein tyrosine kinase                                       | 0.48   | AACGGTGACCTTTAGTGCCAAA  | NM_006293:    | NM_006293:                               |
| 7301   | TYRO3   | TYRO3 protein tyrosine kinase                                       | -3.22  | CGGACTGACCAAACTACCCCAA  | NM_006293:    | NM_006293:                               |
| 7305   | TYROBP  | TYRO protein tyrosine kinase binding protein                        | -0.38  | CGAATCATGACAGTCAAGCAA   | NM_003332:    | NM_003332.NM_198125:                     |
| 7305   | TYROBP  | TYRO protein tyrosine kinase binding protein                        | -1.34  | CTGGATCCAGCCATTCCTGAA   | NM_003332:    | NM_003332.NM_198125:                     |
| 7306   | TYRP1   | tyrosinase-related protein 1                                        | 1.01   | TAGATTGAGTATTAACTGTA    | NM_000550:    | NM_000550:                               |
| 7306   | TYRP1   | tyrosinase-related protein 1                                        | -0.18  | CCTATTGGACATAATAGACAA   | NM_000550:    | NM_000550:                               |
| 219743 | TYSD1   | trypsin domain containing 1                                         | 0.54   | CAGCAGAAACCTTGCTCTGAA   | NM_173555:    | NM_173555:                               |
| 219743 | TYSD1   | trypsin domain containing 1                                         | -5.75  | CAGCAGTACAGCCAGACCCAA   | NM_173555:    | NM_173555:                               |
| 7311   | UBA52   | ubiquitin A-52 residue ribosomal protein fusion product 1           | 0.01   | AATACAACCTGGCAGCAAGATGA | NM_003333:    | NM_00103930.NM_003333:                   |
| 7311   | UBA52   | ubiquitin A-52 residue ribosomal protein fusion product 1           | 0.27   | AACTGCGCCAGAAAGAAAGTG   | NM_003333:    | NM_00103930.NM_003333:                   |
| 10422  | UBADC1  | ubiquitin associated domain containing 1                            | 0.96   | AATGTCAAGCATGCTAATTTA   | NM_016172:    | NM_016172:                               |
| 10422  | UBADC1  | ubiquitin associated domain containing 1                            | 0.03   | CCCAGAGTTAATGTCAAGCAT   | NM_016172:    | NM_016172:                               |
| 9898   | UBAP2L  | ubiquitin associated protein 2-like                                 | 0.19   | CCCAATTCAGTCGACCAACCTA  | NM_014847:    | NM_014847:                               |
| 9898   | UBAP2L  | ubiquitin associated protein 2-like                                 | -4.50  | CAGCAGATATCTCAGGGCTAA   | NM_014847:    | NM_014847:                               |
| 53347  | UBASH3A | ubiquitin associated and SH3 domain containing, A                   | -4.00  | AACAGGTGTTAATGCAATAAA   | NM_001001895: | NM_018961.NM_001001895:                  |
| 53347  | UBASH3A | ubiquitin associated and SH3 domain containing, A                   | -6.90  | ACGGCCAAACTCATCTGGAA    | NM_001001895: | NM_018961.NM_001001895:                  |
|        | UBB     | ubiquitin B                                                         | -13.12 | UBB                     |               |                                          |
|        | UBB     | ubiquitin B                                                         | -11.94 | UBB                     |               |                                          |
| 7316   | UBC     | ubiquitin C                                                         | -0.59  | GAGGTTGATCTTTGCCGGAAA   | NM_021009:    | NM_021009:                               |
| 7316   | UBC     | ubiquitin C                                                         | -2.74  | GAGGTTGATCTTTGCTGGGAA   | NM_021009:    | NM_021009:                               |
| 10537  | UBD     | ubiquitin D                                                         | 0.04   | AACCCATATGACAGCGTGAAA   | NM_006398:    | NM_006398:                               |
| 10537  | UBD     | ubiquitin D                                                         | 0.87   | ATGGGATTTAATGACCTTTGA   | NM_006398:    | NM_006398:                               |
| 7318   | UBE1L   | ubiquitin-activating enzyme E1-like                                 | -0.31  | ATGCTGTTAAAGGAAAGGCAA   | NM_003335:    | NM_003335:                               |
| 7318   | UBE1L   | ubiquitin-activating enzyme E1-like                                 | -0.04  | CAGCAGAAGGAACTGAACAAA   | NM_003335:    | NM_003335:                               |
| 7319   | UBE2A   | ubiquitin-conjugating enzyme E2A (RAD6 homolog)                     | 1.77   | AACACCTCTATGAAATCAAA    | NM_003336:    | NM_181777.NM_181762.NM_003336:           |
| 7319   | UBE2A   | ubiquitin-conjugating enzyme E2A (RAD6 homolog)                     | 0.01   | AAGCGTGTTCGCAATAGTA     | NM_003336:    | NM_181777.NM_181762.NM_003336:           |
| 7320   | UBE2B   | ubiquitin-conjugating enzyme E2B (RAD6 homolog)                     | -0.83  | ACCTCATTAGAAAGGCTAA     | NM_003337:    | NM_003337:                               |
| 7320   | UBE2B   | ubiquitin-conjugating enzyme E2B (RAD6 homolog)                     | 0.05   | CCGAGTATTAGCAATGAATA    | NM_003337:    | NM_003337:                               |
| 11065  | UBE2C   | ubiquitin-conjugating enzyme E2C                                    | 1.06   | AGCCCTGTATATTAATAAAA    | NM_007019:    | NM_181803.NM_181799.NM_181802.NM_007019: |
| 11065  | UBE2C   | ubiquitin-conjugating enzyme E2C                                    | 0.21   | GAGCCCTGTATATTAATAAAA   | NM_007019:    | NM_181803.NM_181799.NM_181802.NM_007019: |
| 7327   | UBE2G2  | ubiquitin-conjugating enzyme E2G 2 (UBC7 homolog, yeast)            | 1.43   | AAGATTACGTTTGTATATTA    | NM_003343:    | NM_182688.NM_003343:                     |
| 7327   | UBE2G2  | ubiquitin-conjugating enzyme E2G 2 (UBC7 homolog, yeast)            | 0.53   | AAGGACTCTACCATATCTTA    | NM_003343:    | NM_182688.NM_003343:                     |
| 7334   | UBE2N   | ubiquitin-conjugating enzyme E2N (UBC13 homolog, yeast)             | 1.36   | CAGATTTGTTTAAAGATAGTA   | NM_003348:    | NM_003348:                               |
| 7334   | UBE2N   | ubiquitin-conjugating enzyme E2N (UBC13 homolog, yeast)             | -1.93  | TAGCCAGTCAATAATACATAA   | NM_003348:    | NM_003348:                               |
| 27338  | UBE2S   | ubiquitin-conjugating enzyme E2S                                    | -0.14  | CCCGATGGCATCAAGGCTTTT   | NM_014501:    | NM_014501:                               |
| 29089  | UBE2T   | ubiquitin-conjugating enzyme E2T (putative)                         | -2.18  | TCGGCTGACATAATCCTCGAA   | NM_139209:    | NM_014176:                               |

|        |             |                                                                       |        |                        |            |                                |
|--------|-------------|-----------------------------------------------------------------------|--------|------------------------|------------|--------------------------------|
| 29089  | UBE2T       | ubiquitin-conjugating enzyme E2T (putative)                           | -8.19  | ATCCTCAGAATTTAAATATA   | NM_014176: | NM_014176:                     |
| 29089  | UBE2T       | ubiquitin-conjugating enzyme E2T (putative)                           | -3.65  | TGCAACTGTGTTGACCTCTA   | NM_014176: | NM_014176:                     |
| 7335   | UBE2V1      | ubiquitin-conjugating enzyme E2 variant 1                             | -3.60  | AAGGAAGAGCTTGAACCTAGAA | NM_021988: | NM_199144;NM_022442;NM_021988: |
| 7335   | UBE2V1      | ubiquitin-conjugating enzyme E2 variant 1                             | -0.38  | CACGGGAATTAATTATTGTC   | NM_021988: | NM_199144;NM_022442;NM_021988: |
| 7336   | UBE2V2      | ubiquitin-conjugating enzyme E2 variant 2                             | 0.94   | CAAGGAGCTCTAGGATTATA   | NM_003350: | NM_003350:                     |
| 7336   | UBE2V2      | ubiquitin-conjugating enzyme E2 variant 2                             | -3.38  | CAGAAGCTCCTCCGTCAGTTA  | NM_003350: | NM_003350:                     |
| 7337   | UBE3A       | ubiquitin protein ligase E3A (human papilloma virus E6-associated prc | -0.30  | CAGACTGTGCTTAATACAA    | NM_000462: | NM_130839;NM_130838;NM_000462: |
| 7337   | UBE3A       | ubiquitin protein ligase E3A (human papilloma virus E6-associated prc | 0.51   | CCAGATTGCTCTAATGAA     | NM_000462: | NM_130839;NM_130838;NM_000462: |
| 89910  | UBE3B       | ubiquitin protein ligase E3B                                          | 0.10   | AAGTTGATGCCGGATTGCGAA  | NM_130466: | NM_183414;NM_130466;NM_183415: |
| 89910  | UBE3B       | ubiquitin protein ligase E3B                                          | -9.14  | CAGCATGGGTTGAGGTACAA   | NM_130466: | NM_183414;NM_130466;NM_183415: |
| 9690   | UBE3C       | ubiquitin protein ligase E3C                                          | -0.47  | TAGGTCAAGACAATCATCAA   | NM_376730: | NM_014671:                     |
| 9690   | UBE3C       | ubiquitin protein ligase E3C                                          | 0.07   | CCCATAGAAGTTGATAGTCAA  | NM_376730: | NM_014671:                     |
| 9354   | UBE4A       | ubiquitination factor E4A (UFD2 homolog, yeast)                       | 0.87   | TACCAAGAGGCTAATACTAAA  | NM_004788: | NM_004788:                     |
| 9354   | UBE4A       | ubiquitination factor E4A (UFD2 homolog, yeast)                       | 0.70   | CTCAGTGTGTGAGATATATA   | NM_004788: | NM_004788:                     |
| 5412   | UBL3        | ubiquitin-like 3                                                      | 1.33   | CGCGTAGTATATAGAACAATA  | NM_007106: | NM_007106:                     |
| 5412   | UBL3        | ubiquitin-like 3                                                      | -1.13  | AAGGACGATTTCTACATGGAA  | NM_007106: | NM_007106:                     |
| 8266   | UBL4A       | ubiquitin-like 4A                                                     | 1.42   | TAGGCTGTTTCTGATATCCAA  | NM_014235: | NM_014235:                     |
| 8266   | UBL4A       | ubiquitin-like 4A                                                     | -0.92  | CAGGACACACCTCGTGAGCAT  | NM_014235: | NM_014235:                     |
| 164153 | UBL4B       | ubiquitin-like 4B                                                     | -3.47  | CTGCTTGTGCTCCAGCTTAA   | NM_203412: | NM_203412:                     |
| 164153 | UBL4B       | ubiquitin-like 4B                                                     | -4.75  | GAGGACGAGCTGATCAGTAA   | NM_203412: | NM_203412:                     |
| 84993  | UBL7        | ubiquitin-like 7 (bone marrow stromal cell-derived)                   | -0.26  | TACCTGATGGTCAACTCTCAA  | NM_032907: | NM_201265;NM_032907:           |
| 84993  | UBL7        | ubiquitin-like 7 (bone marrow stromal cell-derived)                   | 1.54   | CCCAATATACCTGATGGTCAA  | NM_032907: | NM_201265;NM_032907:           |
| 134510 | UBLCP1      | ubiquitin-like domain containing CTD phosphatase 1                    | 0.75   | CAGCTGTGCTTAGTATGAGA   | NM_145049: | NM_145049:                     |
| 134510 | UBLCP1      | ubiquitin-like domain containing CTD phosphatase 1                    | 0.04   | GCGCACCTAATCGTGATAAA   | NM_145049: | NM_145049:                     |
| 29855  | UBN1        | ubiquitin 1                                                           | 0.45   | CTCCAGGCTTTCTGCCCTAAA  | NM_175617: | NM_016936:                     |
| 22888  | UBOX5       | U-box domain containing 5                                             | 0.26   | TCCGGTGTGCTGTTGTTCTTA  | NM_014948: | NM_014948;NM_199415:           |
| 22888  | UBOX5       | U-box domain containing 5                                             | -0.02  | CGGACACATTCCTTCCTTAA   | NM_014948: | NM_014948;NM_199415:           |
| 56061  | UBPH        | ubiquitin-binding protein homolog                                     | -1.87  | CCGAACATGTTGTTGGAATA   | NM_019116: | NM_019116:                     |
| 56061  | UBPH        | ubiquitin-binding protein homolog                                     | -0.17  | CTGTCCGGGATGCAATAAAA   | NM_019116: | NM_019116:                     |
| 29979  | UBQLN1      | ubiquitin 1                                                           | 0.22   | TGGGATAGTGCATAACTAAT   | NM_013438: | NM_013438:                     |
| 29979  | UBQLN1      | ubiquitin 1                                                           | 0.06   | GTGGATAGTGCATAACTAA    | NM_013438: | NM_013438:                     |
| 29978  | UBQLN2      | ubiquitin 2                                                           | 0.40   | TCCCATAAAGAGCCCTAATA   | NM_013444: | NM_013444:                     |
| 29978  | UBQLN2      | ubiquitin 2                                                           | 0.73   | CTGAAGGATCAGTGTAGTAA   | NM_013444: | NM_013444:                     |
| 50613  | UBQLN3      | ubiquitin 3                                                           | -3.42  | TTGAGATGCAATACACCCAA   | NM_017481: | NM_017481:                     |
| 50613  | UBQLN3      | ubiquitin 3                                                           | 1.14   | CAAGATTTAGTTAGTACAAAT  | NM_017481: | NM_017481:                     |
| 56893  | UBQLN4      | ubiquitin 4                                                           | -0.09  | CCAGAGGAAATTCGTGTGAAA  | NM_020131: | NM_020131:                     |
| 56893  | UBQLN4      | ubiquitin 4                                                           | 0.37   | CACACTGGCCTTTGTAATAAA  | NM_020131: | NM_020131;NM_209569;NM_020131: |
| 197131 | UBR1        | ubiquitin protein ligase E3 component n-recogin 1                     | -0.28  | CAGGAATTTGGGATACCTGTA  | NM_174916: | NM_174916:                     |
| 197131 | UBR1        | ubiquitin protein ligase E3 component n-recogin 1                     | -1.92  | AACCCACAATATGGACAGAAA  | NM_174916: | NM_174916:                     |
| 23304  | UBR2        | ubiquitin protein ligase E3 component n-recogin 2                     | -4.13  | CAGGTAATGCATAGATGAA    | NM_015255: | NM_015255:                     |
| 23304  | UBR2        | ubiquitin protein ligase E3 component n-recogin 2                     | -4.74  | CAGAACAATACTAATAGAA    | NM_015255: | NM_015255:                     |
| 80019  | UBTD1       | ubiquitin domain containing 1                                         | 0.25   | ATCTGCATATTTTCAATAAA   | NM_024954: | NM_024954:                     |
| 80019  | UBTD1       | ubiquitin domain containing 1                                         | -0.13  | TATCTGCATATTTCAATAAA   | NM_024954: | NM_024954:                     |
| 7345   | UCHL1       | ubiquitin carboxyl-terminal esterase L1 (ubiquitin thiolesterase)     | -0.37  | CAGCCACACCCAGGCACTTAA  | NM_004181: | NM_004181:                     |
| 7345   | UCHL1       | ubiquitin carboxyl-terminal esterase L1 (ubiquitin thiolesterase)     | 0.03   | GTGGCCAAATATCAAGACAAA  | NM_004181: | NM_004181:                     |
| 7347   | UCHL3 (ubiq | ubiquitin carboxyl-terminal esterase L3 (ubiquitin thiolesterase)     | 1.22   | AAGTATATTTGCAACTAA     | NM_006002: | NM_006002:                     |
| 7347   | UCHL3 (ubiq | ubiquitin carboxyl-terminal esterase L3 (ubiquitin thiolesterase)     | 1.17   | TAGAAGTTTCAAGAAAGTTTA  | NM_006002: | NM_006002:                     |
| 51377  | UCHL5       | ubiquitin carboxyl-terminal hydrolase L5                              | -6.89  | AACGATATTCCTTATCTGTAA  | NM_015984: | NM_015984:                     |
| 51377  | UCHL5       | ubiquitin carboxyl-terminal hydrolase L5                              | -1.70  | TCGATTTAATTTAATGGCCAT  | NM_015984: | NM_015984:                     |
| 83549  | UCK1        | uridine-cytidine kinase 1                                             | -2.00  | AACGGTGGAGGTGCCGACCTA  | NM_031432: | NM_031432:                     |
| 83549  | UCK1        | uridine-cytidine kinase 1                                             | 1.28   | TGCGGTTTAAAGATCCCTCTA  | NM_031432: | NM_031432:                     |
| 7371   | UCK2        | uridine-cytidine kinase 2                                             | -1.19  | CGGATGCCCTTGAACAATGAA  | NM_012474: | NM_012474:                     |
| 7371   | UCK2        | uridine-cytidine kinase 2                                             | 1.28   | TCAGTACATACGTTGCTGAA   | NM_012474: | NM_012474:                     |
| 54963  | UCKL1       | uridine-cytidine kinase 1-like 1                                      | -2.34  | ACCCAGGACTGTTGAATACAA  | NM_017859: | NM_017859:                     |
| 54963  | UCKL1       | uridine-cytidine kinase 1-like 1                                      | 0.14   | TACAATGAACACGGCAGCCAA  | NM_017859: | NM_017859:                     |
| 7349   | UCN         | urocortin                                                             | 2.42   | CGAAGCCGATCATATTTCGA   | NM_003353: | NM_003353:                     |
| 7349   | UCN         | urocortin                                                             | 0.30   | CGGCATCATATTGCACTCGGT  | NM_003353: | NM_003353:                     |
| 90226  | UCN2        | urocortin 2                                                           | -0.47  | CTGGACATTTGGACATGCTAA  | NM_033199: | NM_033199:                     |
| 90226  | UCN2        | urocortin 2                                                           | -3.12  | CAGCTTGGATGTCGCCAGTAA  | NM_033199: | NM_033199:                     |
| 7350   | UCP1        | uncoupling protein 1 (mitochondrial, proton carrier)                  | -0.02  | AACGAGAACTGTCAAAGTCAA  | NM_021833: | NM_021833:                     |
| 7350   | UCP1        | uncoupling protein 1 (mitochondrial, proton carrier)                  | 0.16   | TGCAATGAAGGTGTTCACTAA  | NM_021833: | NM_021833:                     |
| 7351   | UCP2        | uncoupling protein 2 (mitochondrial, proton carrier)                  | 0.02   | AGCCCACTTGTCAATCCATAAA | NM_003355: | NM_003355:                     |
| 7351   | UCP2        | uncoupling protein 2 (mitochondrial, proton carrier)                  | -0.91  | TAGCCCACTTGTCAATCCATAA | NM_003355: | NM_003355:                     |
| 7352   | UCP3        | uncoupling protein 3 (mitochondrial, proton carrier)                  | 0.38   | CGGGAAATATTATGACTCAA   | NM_003356: | NM_003356:                     |
| 7352   | UCP3        | uncoupling protein 3 (mitochondrial, proton carrier)                  | -0.11  | TCGGGAAATATTATGACTCAA  | NM_003356: | NM_003356:                     |
| 56886  | UGCGL1      | UDP-glucose ceramide glucosyltransferase-like 1                       | -2.58  | CGGGGAAAAGTATCATATCA   | NM_020120: | NM_020120;NM_001025777:        |
| 56886  | UGCGL1      | UDP-glucose ceramide glucosyltransferase-like 1                       | -1.66  | TGGCGTGGAAATGGCCATTAA  | NM_020120: | NM_020120;NM_001025777:        |
| 7360   | UGP2        | UDP-glucose pyrophosphorylase 2                                       | 1.41   | CGAGTCAAGTCTGTATCAAA   | NM_006759: | NM_006759;NM_001001521:        |
| 54658  | UGT1A1      | UDP glucuronosyltransferase 1 family, polypeptide A1                  | 0.87   | TTCCCACTACTGCACAACAA   | NM_000463: | NM_000463:                     |
| 54600  | UGT1A9      | UDP glucuronosyltransferase 1 family, polypeptide A9                  | 0.68   | AGGAGTTGTTTAAAGACAAA   | NM_021027: | NM_021027:                     |
| 54600  | UGT1A9      | UDP glucuronosyltransferase 1 family, polypeptide A9                  | 0.62   | TACGAAGTATATATTCCTCTA  | NM_021027: | NM_021027:                     |
| 7363   | UGT2B4      | UDP glucuronosyltransferase 2 family, polypeptide B4                  | 1.64   | AGGAAGCTAATAAATAATTA   | NM_021139: | NM_021139:                     |
| 7363   | UGT2B4      | UDP glucuronosyltransferase 2 family, polypeptide B4                  | -0.61  | ATGAGGTATATTTGAAATGTA  | NM_021139: | NM_021139:                     |
| 127933 | UHMK1       | U2AF homology motif (UHM) kinase 1                                    | 0.70   | AAGCAGTACTGTACTGCTGAA  | NM_144624: | NM_144624:                     |
| 127933 | UHMK1       | U2AF homology motif (UHM) kinase 1                                    | -1.32  | CCACATATGAATGCAGGACTA  | NM_144624: | NM_144624:                     |
| 29128  | UHRF1       | ubiquitin-like, containing PHD and RING finger domains, 1             | 1.34   | CACCTCTTATTTCTTAGATTA  | NM_013282: | NM_013282:                     |
| 29128  | UHRF1       | ubiquitin-like, containing PHD and RING finger domains, 1             | 1.72   | ACCAAGAAAGATATAACGTTA  | NM_013282: | NM_013282:                     |
| 115426 | UHRF2       | ubiquitin-like, containing PHD and RING finger domains, 2             | 1.94   | CACATATTTCCCTAAAGTATA  | NM_152306: | NM_152306;NM_152896:           |
| 115426 | UHRF2       | ubiquitin-like, containing PHD and RING finger domains, 2             | -0.04  | CAGATATGATGGCATTATATA  | NM_152306: | NM_152306;NM_152896:           |
| 80329  | ULBP1       | UL16 binding protein 1                                                | 1.10   | TCGGGATATCCACAGGAAA    | NM_025218: | NM_025218:                     |
| 80329  | ULBP1       | UL16 binding protein 1                                                | 0.06   | TATGATGATAATGTATAATA   | NM_025218: | NM_025218:                     |
| 80328  | ULBP2       | UL16 binding protein 2                                                | -0.07  | CAGCAGTTATACCTAACATAT  | NM_025217: | NM_025217:                     |
| 80328  | ULBP2       | UL16 binding protein 2                                                | 0.04   | TTGTTGCTAGTATATTTAA    | NM_025217: | NM_025217:                     |
| 79465  | ULBP3       | UL16 binding protein 3                                                | 0.05   | CCAGGCTTAGCTCAACCCAAA  | NM_024518: | NM_024518:                     |
| 79465  | ULBP3       | UL16 binding protein 3                                                | -0.41  | CTGGTATAACTTCCACATCAT  | NM_024518: | NM_024518:                     |
| 8408   | ULK1        | unc-51-like kinase 1 (C. elegans)                                     | 1.53   | CGCGCGGTACCTCCAGAGCAA  | NM_003565: | NM_003565:                     |
| 8408   | ULK1        | unc-51-like kinase 1 (C. elegans)                                     | 1.37   | TGCCCTTTGCGTTATATTGTA  | NM_003565: | NM_003565:                     |
| 9706   | ULK2        | unc-51-like kinase 2 (C. elegans)                                     | -0.37  | ACCGGGAAGTTATCAGATCAA  | NM_014683: | NM_014683:                     |
| 9706   | ULK2        | unc-51-like kinase 2 (C. elegans)                                     | 1.08   | ATCGGTACAGTATTTCTTAAA  | NM_014683: | NM_014683:                     |
| 25989  | ULK3        | unc-51-like kinase 3 (C. elegans)                                     | -25.02 | CACGTACGCCAGGTTACAAA   | NM_015518: | NM_015518:                     |
| 25989  | ULK3        | unc-51-like kinase 3 (C. elegans)                                     | -3.83  | AAGGACACTCGTGAAGTGGTA  | NM_015518: | NM_015518:                     |
| 7372   | UMPS        | uridine monophosphate synthetase (rotate phosphoribosyl) transferas   | 1.66   | CACCCGATGACTACTATAATA  | NM_000373: | NM_000373:                     |
| 7372   | UMPS        | uridine monophosphate synthetase (rotate phosphoribosyl) transferas   | -1.52  | AAGCTTCTCAGGCTTATGCAA  | NM_000373: | NM_000373:                     |
| 9094   | UNC119      | unc-119 homolog (C. elegans)                                          | -1.28  | CGGCTGGTATGCACAATAA    | NM_005148: | NM_005148;NM_054035:           |
| 9094   | UNC119      | unc-119 homolog (C. elegans)                                          | 0.59   | CAGGCCATTTAGAGTTGTAAA  | NM_005148: | NM_005148;NM_054035:           |
| 23025  | UNC13A      | unc-13 homolog A (C. elegans)                                         | -0.72  | CGCCCTATTATACACTGCTCA  | NM_038604: | NM_038604:                     |
| 23025  | UNC13A      | unc-13 homolog A (C. elegans)                                         | 1.26   | TGGACCAAAATCCAGAAACAA  | NM_038604: | NM_038604:                     |
| 10497  | UNC13B      | unc-13 homolog B (C. elegans)                                         | 1.33   | CTGCTCGCGTGGCGGTTAAA   | NM_006377: | NM_006377:                     |
| 10497  | UNC13B      | unc-13 homolog B (C. elegans)                                         | 1.23   | ACCAGATAAATTAACACATA   | NM_006377: | NM_006377:                     |

|        |                                               |                                                                        |       |                        |            |                                |
|--------|-----------------------------------------------|------------------------------------------------------------------------|-------|------------------------|------------|--------------------------------|
| 440279 | UNC13C                                        | unc-13 homolog C (C. elegans)                                          | -0.92 | CAAGCTGATCTAATACGTTAA  | XM_496070: | XM_496070:                     |
| 440279 | UNC13C                                        | unc-13 homolog C (C. elegans)                                          | 0.36  | ATGGGAATGTTTGGTCACTA   | XM_496070: | XM_496070:                     |
| 90249  | UNC5A                                         | unc-5 homolog A (C. elegans)                                           | -3.29 | CACCATTGGAGGTCGCCATTTA | NM_133369: | NM_133369:                     |
| 90249  | UNC5A                                         | unc-5 homolog A (C. elegans)                                           | 0.28  | CGCATTAAATGCTCAAGGCA   | NM_133369: | NM_133369:                     |
| 219699 | UNC5B                                         | unc-5 homolog B (C. elegans)                                           | 1.14  | CAGCCTTAAGGTCAGGCTCA   | NM_170744: | NM_170744:                     |
| 219699 | UNC5B                                         | unc-5 homolog B (C. elegans)                                           | 0.96  | CACCGTCATCGTCTACGTGAA  | NM_170744: | NM_170744:                     |
| 8633   | UNC5C                                         | unc-5 homolog C (C. elegans)                                           | 0.03  | CGGCCTCGTTCGCAATCCAA   | NM_003728: | NM_003728:                     |
| 8633   | UNC5C                                         | unc-5 homolog C (C. elegans)                                           | 2.40  | CTATTTTCAGATTAGTAATTTA | NM_003728: | NM_003728:                     |
| 137970 | UNC5D                                         | unc-5 homolog D (C. elegans)                                           | -0.05 | TACATAGGATTTCTATAGAAA  | NM_080872: | NM_080872:                     |
| 137970 | UNC5D                                         | unc-5 homolog D (C. elegans)                                           | -0.04 | CAAGATGTCCTGGTAGACTAA  | NM_080872: | NM_080872:                     |
| 7374   | UNG                                           | uracil-DNA glycosylase                                                 | 0.02  | ATGGGATTTGTTGCAGAAGAA  | NM_003362: | NM_080911:NM_003362:           |
| 7374   | UNG                                           | uracil-DNA glycosylase                                                 | 0.71  | TACGGAGGTTGTTTAATAAA   | NM_003362: | NM_080911:NM_003362:           |
| 389400 | UNQ9356                                       | IVF19356                                                               | 0.68  | GAGGAATTCATCATACTGTAA  | NM_207410: | NM_207410:                     |
| 389400 | UNQ9356                                       | IVF19356                                                               | -2.74 | CACAGTTGGCCCTTACCTTA   | NM_207410: | NM_207410:                     |
| 203074 | UNQ9391                                       | tryptophan/serine protease                                             | -0.41 | AGGGAAGAACTCGGTATTCCA  | NM_198464: | NM_198464:                     |
| 203074 | UNQ9391                                       | tryptophan/serine protease                                             | 0.41  | CACCTCGTTGGTGAACACAA   | NM_198464: | NM_198464:                     |
| 387990 | UNQ9438                                       | TIMM9                                                                  | -1.33 | TGGGAGAATTTGGTTACTTA   | NM_207377: | NM_207377:                     |
| 387990 | UNQ9438                                       | TIMM9                                                                  | 0.83  | TCCAGTGAGAATACTTGTGA   | NM_207377: | NM_207377:                     |
| 5976   | UPF1                                          | UPF1 regulator of nonsense transcripts homolog (yeast)                 | -0.62 | ACGGAGCGCTGCACACCGAAA  | NM_002911: | NM_002911:                     |
| 5976   | UPF1                                          | UPF1 regulator of nonsense transcripts homolog (yeast)                 | -0.49 | CATCTTATTCGGGTAATAAA   | NM_002911: | NM_002911:                     |
| 7384   | UQCRC1                                        | ubiquitin-cytochrome c reductase core protein I                        | 0.80  | CCACAGGTGACCACCAATAAA  | NM_003365: | NM_003365:                     |
| 7384   | UQCRC1                                        | ubiquitin-cytochrome c reductase core protein I                        | -6.99 | CGGACAATGTGGCCTTGCAA   | NM_003365: | NM_003365:                     |
| 7385   | UQCRC2                                        | ubiquitin-cytochrome c reductase core protein II                       | -0.77 | AAGGCTGCCTAATCAAGTA    | NM_003366: | NM_003366:                     |
| 7385   | UQCRC2                                        | ubiquitin-cytochrome c reductase core protein II                       | -0.70 | ATCAAGGCTGCCTAATCAAA   | NM_003366: | NM_003366:                     |
| 7388   | UQCRH                                         | ubiquitin-cytochrome c reductase hinge protein                         | 1.32  | CGTGTGAATCTAGAACCCTGA  | NM_006004: | NM_006004:                     |
| 7388   | UQCRH                                         | ubiquitin-cytochrome c reductase hinge protein                         | 1.71  | TTCTATGTAATTCGCAATGAT  | NM_006004: | NM_006004:                     |
| 7389   | UROD                                          | uroporphyrinogen decarboxylase                                         | 0.22  | ACCGTATACCTTTACCCCTCAA | NM_000374: | NM_000374:                     |
| 7389   | UROD                                          | uroporphyrinogen decarboxylase                                         | -0.67 | CTGGATGACTTTGGACCACAT  | NM_000374: | NM_000374:                     |
| 7390   | UROS                                          | uroporphyrinogen III synthase (congenital erythropoietic porphyria)    | -1.08 | CAGCAGGAAGGAAAGTCAATA  | NM_000375: | NM_000375:                     |
| 7390   | UROS                                          | uroporphyrinogen III synthase (congenital erythropoietic porphyria)    | 0.40  | ATCGATCAAAATTAAGTTTGA  | NM_000375: | NM_000375:                     |
| 7391   | USF1                                          | upstream transcription factor 1                                        | -1.23 | CGGATTAGAGTCTGCTATCAA  | NM_007122: | NM_207005:NM_007122:           |
| 7391   | USF1                                          | upstream transcription factor 1                                        | -2.70 | CAGAGTAAAGTGGGATTCTA   | NM_007122: | NM_207005:NM_007122:           |
| 7392   | USF2                                          | upstream transcription factor 2, c-fos interacting                     | -0.10 | AAGAGCCCGACACACGGAAGT  | NM_003367: | NM_207291:NM_003367:           |
| 7392   | USF2                                          | upstream transcription factor 2, c-fos interacting                     | -0.68 | AAGACTGTACCGCAGACAACA  | NM_003367: | NM_003367:NM_207291:           |
| 9100   | USP10                                         | ubiquitin specific peptidase 10                                        | 0.00  | CAGCTTTGTTGGCCTAATGAA  | NM_005153: | NM_005153:                     |
| 9100   | USP10                                         | ubiquitin specific peptidase 10                                        | -0.93 | AAGGAACTGTGCTCATTTA    | NM_005153: | NM_005153:                     |
| 8237   | USP11                                         | ubiquitin specific peptidase 11                                        | -4.64 | CTGCGTGGGTCACGTGATGAA  | NM_004651: | NM_004651:                     |
| 8237   | USP11                                         | ubiquitin specific peptidase 11                                        | -0.97 | ACCGATTCTATGGCCCTAGTA  | NM_004651: | NM_004651:                     |
| 219333 | USP12                                         | ubiquitin specific peptidase 12                                        | 0.19  | CCGATCATGGTAGTTGATTTA  | NM_182488: | NM_182488:                     |
| 219333 | USP12                                         | ubiquitin specific peptidase 12                                        | 0.76  | ATGGATCAACTTCATCGATTAT | NM_182488: | NM_182488:                     |
| 8975   | USP13                                         | ubiquitin specific peptidase 13 (isopeptidase T-3)                     | -0.08 | TCGCTTATGAACTAACGAGAA  | NM_003940: | NM_003940:                     |
| 8975   | USP13                                         | ubiquitin specific peptidase 13 (isopeptidase T-3)                     | 0.48  | TCCGGTGAATCTGAACCTCAT  | NM_003940: | NM_003940:                     |
| 9097   | USP14                                         | ubiquitin specific peptidase 14 (tRNA-guanine transglycosylase)        | 1.20  | CCCATCTTTGCCCTTACTTAA  | NM_005151: | NM_005151:NM_001037334:        |
| 9097   | USP14                                         | ubiquitin specific peptidase 14 (tRNA-guanine transglycosylase)        | -0.32 | CAGAGTGAATGCCTTTCAA    | NM_005151: | NM_005151:NM_001037334:        |
| 9958   | USP15                                         | ubiquitin specific peptidase 15                                        | 0.34  | TATGTCCGAATCTTAAATTA   | NM_006313: | NM_006313:                     |
| 9958   | USP15                                         | ubiquitin specific peptidase 15                                        | -1.53 | AAGATGATACCAGGCATATA   | NM_006313: | NM_006313:                     |
| 10869  | USP19                                         | ubiquitin specific peptidase 19                                        | -1.09 | CCGGCTGTGGGAGGAGATAA   | XM_496642: | NM_006676:                     |
| 10868  | USP20                                         | ubiquitin specific peptidase 20                                        | 0.43  | CCGGATGATGAACAGGGATA   | NM_006676: | NM_001008563:NM_006676:        |
| 10868  | USP20                                         | ubiquitin specific peptidase 20                                        | -3.49 | CAGGCTTTGTAACACGACCAA  | NM_006676: | NM_001008563:NM_006676:        |
| 27005  | USP21                                         | ubiquitin specific peptidase 21                                        | 1.53  | CAACCTAATGTGAAACGCTTA  | NM_012475: | NM_012475:NM_001014443:        |
| 23358  | USP24                                         | ubiquitin specific peptidase 24                                        | 0.30  | CACAATCTGTGACCGTATAA   | XM_371254: | XM_371254:                     |
| 23358  | USP24                                         | ubiquitin specific peptidase 24                                        | -0.48 | CCGAGTCTGATGAGAATTGTA  | XM_371254: | XM_371254:                     |
| 9960   | USP3                                          | ubiquitin specific peptidase 3                                         | 0.09  | CTCCAAATCATCTCACCAA    | NM_006537: | NM_006537:                     |
| 9960   | USP3                                          | ubiquitin specific peptidase 3                                         | -1.66 | CTGGATCGGATAAATCTTAAT  | NM_006537: | NM_006537:                     |
| 57478  | USP31                                         | ubiquitin specific peptidase 31                                        | 0.50  | CCGAAATATTTAGCCCTGAA   | NM_020718: | NM_020718:                     |
| 57478  | USP31                                         | ubiquitin specific peptidase 31                                        | -1.62 | CCGAGTTTCATGAAGACCTCAA | NM_020718: | NM_020718:                     |
| 84669  | USP32                                         | ubiquitin specific peptidase 32                                        | 1.60  | CACCTAGAAGGAGGACGATTAA | NM_032582: | NM_032582:                     |
| 84669  | USP32                                         | ubiquitin specific peptidase 32                                        | 0.65  | CGCACTGATGATATTCCTGAA  | NM_032582: | NM_032582:                     |
| 23032  | USP33                                         | ubiquitin specific peptidase 33                                        | -0.08 | CCGGTGTGTTGATGTTGATCGA | NM_015017: | NM_201624:NM_015017:           |
| 23032  | USP33                                         | ubiquitin specific peptidase 33                                        | -0.70 | CTGCAAGTAGTGGCAGACATA  | NM_015017: | NM_201624:NM_015017:NM_201626: |
| 9736   | USP34                                         | ubiquitin specific peptidase 34                                        | 1.06  | TCAGCCTGTGTCAGTACAATA  | NM_014709: | NM_014709:                     |
| 9736   | USP34                                         | ubiquitin specific peptidase 34                                        | 0.84  | CTGGATTGAGTCAGATAACAA  | NM_014709: | NM_014709:                     |
| 57558  | USP35 (ubiq. ubiquitin specific peptidase 35) |                                                                        | 1.23  | ACCCATGTTCAATAAATAA    | XM_290527: | XM_290527:                     |
| 57558  | USP35 (ubiq. ubiquitin specific peptidase 35) |                                                                        | 1.86  | CCCTTCTAATCTCAACCGAA   | XM_290527: | XM_290527:                     |
| 57602  | USP36                                         | ubiquitin specific peptidase 36                                        | -5.74 | CCGCATCGAGATGCCATGCAT  | NM_025090: | NM_025090:                     |
| 57602  | USP36                                         | ubiquitin specific peptidase 36                                        | -1.74 | CCCGAGTGTGATCCAGATCA   | NM_025090: | NM_025090:                     |
| 84640  | USP38                                         | ubiquitin specific peptidase 38                                        | 1.56  | CAGCATAGTACTAATGGTTTA  | NM_032557: | NM_032557:                     |
| 84640  | USP38                                         | ubiquitin specific peptidase 38                                        | -2.81 | CAGGAAGTAGTAAAGGCA     | NM_032557: | NM_032557:                     |
| 7375   | USP4                                          | ubiquitin specific peptidase 4 (proto-oncogene)                        | 1.15  | AAGAACAACCTGAATGGTAAA  | NM_003363: | NM_003363:NM_199443:           |
| 7375   | USP4                                          | ubiquitin specific peptidase 4 (proto-oncogene)                        | -0.75 | CAGGACAGCCTTGACGTCAAA  | NM_003363: | NM_003363:NM_199443:           |
| 84132  | USP42                                         | ubiquitin specific peptidase 42                                        | -4.03 | CACGACAGAACTGCACTGTA   | XM_374396: | NM_032172:                     |
| 84132  | USP42                                         | ubiquitin specific peptidase 42                                        | 0.00  | TTGAGAGTACCTAAGATCTA   | XM_374396: | NM_032172:                     |
| 124739 | USP43                                         | ubiquitin specific peptidase 43                                        | 1.38  | CAAGAACTGATATTTACTAAA  | XM_371015: | XM_371015:                     |
| 124739 | USP43                                         | ubiquitin specific peptidase 43                                        | -0.61 | CACCTTTCAGAGAGTCAATAA  | XM_371015: | XM_371015:                     |
| 84101  | USP44                                         | ubiquitin specific peptidase 44                                        | 0.04  | TTGCATGTGACACAAATCAA   | NM_032147: | NM_032147:                     |
| 84101  | USP44                                         | ubiquitin specific peptidase 44                                        | 0.33  | CAGATACAGTAGTATATCAAA  | NM_032147: | NM_032147:                     |
| 85015  | USP45                                         | ubiquitin specific peptidase 45                                        | -1.06 | CAGGAAATTCGGAACATAA    | XM_371838: | XM_371838:                     |
| 85015  | USP45                                         | ubiquitin specific peptidase 45                                        | 1.27  | CGGGTGAAGATCCAACTAAA   | XM_371838: | XM_371838:                     |
| 64854  | USP46                                         | ubiquitin specific peptidase 46                                        | 0.15  | CAGTTATTAATCGAAGTAA    | NM_022832: | NM_022832:                     |
| 64854  | USP46                                         | ubiquitin specific peptidase 46                                        | -0.47 | TAGGAAATGTTTGTACTATA   | NM_022832: | NM_022832:                     |
| 84196  | USP48                                         | ubiquitin specific peptidase 48                                        | -0.32 | ACCAGATGCGTGTGGTCATAA  | NM_032236: | NM_032236:                     |
| 84196  | USP48                                         | ubiquitin specific peptidase 48                                        | 0.01  | CCGAAGTATGCGACATAGAAA  | NM_032236: | NM_032236:                     |
| 8078   | USP5                                          | ubiquitin specific peptidase 5 (isopeptidase T)                        | -0.05 | TACGTCTGCCACATCAAGAAA  | NM_003481: | NM_003481:                     |
| 8078   | USP5                                          | ubiquitin specific peptidase 5 (isopeptidase T)                        | -0.25 | CCAGAACAGAAAGGAGTTCAA  | NM_003481: | NM_003481:                     |
| 373509 | USP50 (ubiq. ubiquitin specific peptidase 50) |                                                                        | 0.41  | CAGCTCAATTAAGCATCGTA   | NM_203494: | XM_203494:                     |
| 373509 | USP50 (ubiq. ubiquitin specific peptidase 50) |                                                                        | -3.91 | CCCGGAGAAGATCATATGAGA  | NM_203494: | XM_203494:                     |
| 158880 | USP51 (ubiq. ubiquitin specific peptidase 51) |                                                                        | 0.30  | CCGAGAGACTAGGAAACGTAA  | NM_201286: | XM_201286:                     |
| 158880 | USP51 (ubiq. ubiquitin specific peptidase 51) |                                                                        | 0.75  | GAGGACTTACTCTACAGTGAA  | NM_201286: | XM_201286:                     |
| 9098   | USP6                                          | ubiquitin specific peptidase 6 (Tre-2 oncogene)                        | 0.02  | GCGGAAGGACATCTTATGAA   | NM_004505: | XM_004505:                     |
| 9098   | USP6                                          | ubiquitin specific peptidase 6 (Tre-2 oncogene)                        | 0.46  | TGGGAGAGGTTTCAACAACA   | NM_004505: | XM_004505:                     |
| 9712   | USP6NL                                        | USP6 N-terminal like                                                   | -0.46 | CCCGAAACATCGCAATAGCA   | XM_374768: | XM_374768:                     |
| 9712   | USP6NL                                        | USP6 N-terminal like                                                   | 0.69  | AGGACCTGTATAGTAAATTA   | XM_374768: | XM_374768:                     |
| 7874   | USP7                                          | ubiquitin specific peptidase 7 (herpes virus-associated)               | 1.09  | CGAGTATGAAGTAAATTTGAA  | NM_003470: | NM_003470:                     |
| 7874   | USP7                                          | ubiquitin specific peptidase 7 (herpes virus-associated)               | -0.84 | CGGGCCGACACAGTACATAA   | NM_003470: | NM_003470:                     |
| 9101   | USP8                                          | ubiquitin specific peptidase 8                                         | -2.86 | CAGGTCGAATTCAAATCTCAA  | NM_005154: | NM_005154:                     |
| 9101   | USP8                                          | ubiquitin specific peptidase 8                                         | -1.86 | CAGGTCAGGCAAGCCATTTA   | NM_005154: | NM_005154:                     |
| 8239   | USP9X                                         | ubiquitin specific peptidase 9, X-linked                               | -2.58 | CCGCCTGCAGTGGAAAGTGTA  | NM_004652: | NM_004652:NM_021906:           |
| 8239   | USP9X                                         | ubiquitin specific peptidase 9, X-linked                               | -2.03 | CAGCTAGTATTTAGCCCAAA   | NM_004652: | NM_004652:NM_021906:           |
| 8287   | USP9Y                                         | ubiquitin specific peptidase 9, Y-linked (fat facets-like, Drosophila) | -1.68 | ATGACTGTCTCAATCTGTAA   | NM_004654: | XM_004654:                     |



|        |                                        |                                                                        |       |                         |            |                                                                                          |
|--------|----------------------------------------|------------------------------------------------------------------------|-------|-------------------------|------------|------------------------------------------------------------------------------------------|
| 8287   | USP9Y                                  | ubiquitin specific peptidase 9, Y-linked (fat facets-like, Drosophila) | -2.41 | CACCTAAGGCTCTTATAGTCCAA | NM_004654: | NM_004654:                                                                               |
| 8287   | USP9Y                                  | ubiquitin specific peptidase 9, Y-linked (fat facets-like, Drosophila) | -1.99 | CTGGCGTTCCATATTCATATA   | AB095936:  | NM_004654:                                                                               |
| 7402   | UTRN                                   | utrophin (homologous to dystrophin)                                    | -0.69 | CAGAGCTGGAAGATGGATTA    | NM_007124: | NM_007124:                                                                               |
| 7402   | UTRN                                   | utrophin (homologous to dystrophin)                                    | -1.72 | CTGGCTGGTATTAATCGACCA   | NM_007124: | NM_007124:                                                                               |
| 257313 | UTS2D                                  | urotensin 2 domain containing                                          | -0.13 | CTGCTGATTAATATCTTGCTA   | NM_198152: | NM_198152:                                                                               |
| 257313 | UTS2D                                  | urotensin 2 domain containing                                          | -0.55 | ATGGATAAGATAGGGTTGTAA   | NM_198152: | NM_198152:                                                                               |
| 2837   | UTS2R                                  | urotensin 2 receptor                                                   | 0.80  | CACCTGCCTCACCTACGGCAA   | NM_018949: | NM_018949:                                                                               |
| 2837   | UTS2R                                  | urotensin 2 receptor                                                   | -0.10 | CACGCTGCCTACCAGGAACCTA  | NM_018949: | NM_018949:                                                                               |
| 8409   | UXT                                    | ubiquitously-expressed transcript                                      | 1.73  | CAAGGACTCCATGAATATCAA   | NM_004182: | NM_004182:NM_153477:                                                                     |
| 8409   | UXT                                    | ubiquitously-expressed transcript                                      | 0.66  | CAGCTGGCCAAATACCTTCAA   | NM_004182: | NM_004182:NM_153477:                                                                     |
| 6844   | VAMP2                                  | vesicle-associated membrane protein 2 (synaptobrevin 2)                | 1.13  | CCCATTAGTTCTTGATCACA    | NM_014232: | NM_014232:                                                                               |
| 6844   | VAMP2                                  | vesicle-associated membrane protein 2 (synaptobrevin 2)                | -0.11 | TCCCTTCATTTGCATCTGCTA   | NM_014232: | NM_014232:                                                                               |
| 7407   | VARS                                   | valyl-tRNA synthetase                                                  | -2.04 | CCGGTTTGGATTATGTGCGCTA  | NM_006295: | NM_006295:                                                                               |
| 7407   | VARS                                   | valyl-tRNA synthetase                                                  | -0.21 | CACGAGGAAGGCATCATCTAT   | NM_006295: | NM_006295:                                                                               |
| 57176  | VARSL                                  | valyl-tRNA synthetase like                                             | 0.34  | CGCTTTATCCTCAATGCTTTA   | XM_373419: | NM_020442:                                                                               |
| 57176  | VARSL                                  | valyl-tRNA synthetase like                                             | -0.94 | CATCGAGGAATGTCTACACAA   | XM_373419: | NM_020442:                                                                               |
| 7408   | VASP                                   | (vasodi vasodilator-stimulated phosphoprotein                          | -0.02 | CCGGGCCACTGTGATGCTTTA   | NM_003370: | NM_001008736:NM_003370:                                                                  |
| 7408   | VASP                                   | (vasodi vasodilator-stimulated phosphoprotein                          | 1.46  | TAGATTCATTTAACCGTTAA    | NM_003370: | NM_001008736:NM_003370:                                                                  |
| 10493  | VAT1                                   | vesicle amine transport protein 1 homolog (T californica)              | -1.20 | CTGGGCTTGACCAGTTCCTCAA  | NM_006373: | NM_006373:                                                                               |
| 10493  | VAT1                                   | vesicle amine transport protein 1 homolog (T californica)              | -0.70 | AAGGAGAAGTTGGGAAGCTA    | NM_006373: | NM_006373:                                                                               |
| 7409   | VAV1                                   | vav 1 oncogene                                                         | 0.49  | CAGCATTAAATAAACGTCGA    | NM_005428: | NM_005428:                                                                               |
| 7409   | VAV1                                   | vav 1 oncogene                                                         | -1.66 | CAGGTGGAGTCAGCCAGCAAA   | NM_005428: | NM_005428:                                                                               |
| 7410   | VAV2 (vav 2 c vav 2 oncogene           |                                                                        | 1.76  | CTGAAAGTCTGCCACGATAAA   | NM_003371: | NM_003371:                                                                               |
| 7410   | VAV2 (vav 2 c vav 2 oncogene           |                                                                        | 0.18  | TTGGCGATGTACATCAATGAA   | NM_003371: | NM_003371:                                                                               |
| 10451  | VAV3 (vav 3 c vav 3 oncogene           |                                                                        | 0.16  | ACCGAAGCTTTAATATAGGTA   | NM_006113: | NM_006113:                                                                               |
| 10451  | VAV3 (vav 3 c vav 3 oncogene           |                                                                        | 0.12  | CACGACTTTCGAAACACCTA    | NM_006113: | NM_006113:                                                                               |
| 7411   | VBP1                                   | von Hippel-Lindau binding protein 1                                    | 0.09  | AGGGTTTAAATTTGGAGTGA    | NM_003372: | NM_003372:                                                                               |
| 7411   | VBP1                                   | von Hippel-Lindau binding protein 1                                    | -1.64 | CTTGACTTTCTCGAGATCAA    | NM_003372: | NM_003372:                                                                               |
| 7412   | VCAM1                                  | vascular cell adhesion molecule 1                                      | 0.01  | CAGGAAGTCCCTGGAACCCAA   | NM_001078: | NM_080682:NM_001078:                                                                     |
| 7412   | VCAM1                                  | vascular cell adhesion molecule 1                                      | 0.21  | CTGGAGTAAGAATAAGATAA    | NM_001078: | NM_080682:NM_001078:                                                                     |
| 7414   | VCL (vinculin) vinculin                |                                                                        | -0.75 | CTGATATAAATGCAATTTAA    | NM_003373: | NM_003373:NM_014000:                                                                     |
| 7414   | VCL (vinculin) vinculin                |                                                                        | -0.78 | TAGGTGTTTGTCTATCTGTA    | NM_003373: | NM_003373:NM_014000:                                                                     |
| 7417   | VDAC2                                  | voltage-dependent anion channel 2                                      | 0.12  | TGGTTTCTAGTTGGTTATCTA   | NM_003375: | NM_003375:                                                                               |
| 7417   | VDAC2                                  | voltage-dependent anion channel 2                                      | 0.26  | ACCATTGAATGAGATGGATCA   | NM_003375: | NM_003375:                                                                               |
| 7417   | VDAC2                                  | voltage-dependent anion channel 2                                      | -0.02 | CAGATTGTCAAGGTTTGAA     | XM_496551: | XM_496551:NM_003375:                                                                     |
| 7417   | VDAC2                                  | voltage-dependent anion channel 2                                      | -1.68 | CCGGTTCATCTAATACAGACA   | XM_496551: | XM_496551:NM_003375:                                                                     |
| 7419   | VDAC3                                  | voltage-dependent anion channel 3                                      | -6.00 | CAGTTCTGAAGTGTATTAA     | NM_005662: | NM_005662:                                                                               |
| 7419   | VDAC3                                  | voltage-dependent anion channel 3                                      | 0.18  | CAGGAGTCAAAATGACTTTAT   | NM_005662: | NM_005662:                                                                               |
| 7421   | VDR                                    | vitamin D (1,25-dihydroxyvitamin D3) receptor                          | -0.39 | TACCACTGATTGGAGATATT    | NM_000376: | NM_000376:NM_001017535:                                                                  |
| 7421   | VDR                                    | vitamin D (1,25-dihydroxyvitamin D3) receptor                          | 0.70  | TCAGACTCCATTTGTATTATA   | NM_000376: | NM_000376:NM_001017535:                                                                  |
| 7422   | VEGF                                   | vascular endothelial growth factor                                     | 0.36  | AAGAAAGATAGAGCAAGACAA   | AF022375:  | NM_001033756:NM_001025368:NM_001025366:NM_003376:NM_001025367:NM_001025369:NM_001025370: |
| 7422   | VEGF                                   | vascular endothelial growth factor                                     | -0.41 | ATAGAGAATCTACATACCTAA   | AF022375:  | NM_001033756:NM_001025368:NM_001025366:NM_003376:NM_001025367:NM_001025369:NM_001025370: |
| 7423   | VEGFB                                  | vascular endothelial growth factor B                                   | -0.37 | AAGACCCAAACCTCTGCATAA   | NM_003377: | NM_003377:                                                                               |
| 7423   | VEGFB                                  | vascular endothelial growth factor B                                   | -0.65 | CAGTGTGAATGCAGACCTAAA   | NM_003377: | NM_003377:                                                                               |
| 7424   | VEGFC                                  | vascular endothelial growth factor C                                   | 0.28  | ACCCTTGTGGGTCATGCTAA    | NM_005429: | NM_005429:                                                                               |
| 7424   | VEGFC                                  | vascular endothelial growth factor C                                   | 1.32  | TTGCTGCAGCACATTATAATA   | NM_005429: | NM_005429:                                                                               |
| 259232 | VGCNL1                                 | voltage gated channel like 1                                           | 0.16  | CAGTGTGTCAAGAAGCTTAA    | NM_052867: | NM_052867:                                                                               |
| 259232 | VGCNL1                                 | voltage gated channel like 1                                           | -1.51 | CCAGATCTTTATCATCCACAA   | NM_052867: | NM_052867:                                                                               |
| 7428   | VHL                                    | von Hippel-Lindau tumor suppressor                                     | 0.34  | AAGGAGGTTGTATAAGTAAT    | NM_000551: | NM_000551:NM_198156:                                                                     |
| 7428   | VHL                                    | von Hippel-Lindau tumor suppressor                                     | -5.68 | CAGGAGCGCATTTGCACATCAA  | NM_000551: | NM_000551:NM_198156:                                                                     |
| 7430   | VIL2                                   | villin 2 (ezrin)                                                       | 0.59  | CACGTTGTAACAGGATTTATA   | NM_003379: | NM_003379:                                                                               |
| 7430   | VIL2                                   | villin 2 (ezrin)                                                       | 0.40  | CAGGACTGATTGAATTACGGA   | NM_003379: | NM_003379:                                                                               |
| 7432   | VIP                                    | vasoactive intestinal peptide                                          | 0.82  | ATGGAATGCTGTGTTAAATAA   | NM_003381: | NM_194435:NM_003381:                                                                     |
| 7432   | VIP                                    | vasoactive intestinal peptide                                          | -0.74 | CCGCACTTCCAGAGAGGTTA    | NM_003381: | NM_194435:NM_003381:                                                                     |
| 7433   | VIPR1                                  | vasoactive intestinal peptide receptor 1                               | -0.72 | AAGCACGGACTCTTACTGCTA   | NM_004624: | NM_004624:                                                                               |
| 7433   | VIPR1                                  | vasoactive intestinal peptide receptor 1                               | 1.04  | CCGGTGGATCTCAAAACACA    | NM_004624: | NM_004624:                                                                               |
| 7434   | VIPR2                                  | vasoactive intestinal peptide receptor 2                               | -3.63 | AACGGAGACTCTGGTCACTA    | NM_003382: | NM_003382:                                                                               |
| 7434   | VIPR2                                  | vasoactive intestinal peptide receptor 2                               | 0.66  | CCCGCTTTCGGGCTCCACTA    | NM_003382: | NM_003382:                                                                               |
| 7436   | VLDLR                                  | very low density lipoprotein receptor                                  | -0.08 | CAAGATCTGGAGGATAGTACTA  | NM_003383: | NM_001018056:NM_003383:                                                                  |
| 7436   | VLDLR                                  | very low density lipoprotein receptor                                  | 1.18  | CAAGGTTGGTAGACATGTTAA   | NM_003383: | NM_001018056:NM_003383:                                                                  |
| 7439   | VMD2                                   | vitelliform macular dystrophy 2 (Best disease, bestrophin)             | -3.25 | CACCTTAGTACTAGCCCCAAA   | NM_004183: | NM_004183:                                                                               |
| 7439   | VMD2                                   | vitelliform macular dystrophy 2 (Best disease, bestrophin)             | 0.38  | ATGTTAGCTTAATAGATAA     | NM_004183: | NM_004183:                                                                               |
| 57191  | VN1R1                                  | vomeronal 1 receptor 1                                                 | -0.41 | ACGGAAGTGTCTCCAGCCAA    | NM_020633: | NM_020633:                                                                               |
| 57191  | VN1R1                                  | vomeronal 1 receptor 1                                                 | -0.17 | ATGGACTGTTCACACAAGA     | NM_020633: | NM_020633:                                                                               |
| 317701 | VN1R2                                  | vomeronal 1 receptor 2                                                 | -0.13 | CACGAGAGAAACCCACCAAA    | NM_173856: | NM_173856:                                                                               |
| 317701 | VN1R2                                  | vomeronal 1 receptor 2                                                 | -0.66 | CGCCCTTCCCTCATCACCTA    | NM_173856: | NM_173856:                                                                               |
| 317703 | VN1R4                                  | vomeronal 1 receptor 4                                                 | 0.87  | TTGGATAATCCCAATAGTTTA   | NM_173857: | NM_173857:                                                                               |
| 317705 | VN1R5                                  | vomeronal 1 receptor 5                                                 | 0.34  | CACAGATATCCTTTGCTTTAA   | NM_173858: | NM_173858:                                                                               |
| 317705 | VN1R5                                  | vomeronal 1 receptor 5                                                 | 1.63  | TAGTCCTTGTGCTAATTTA     | NM_173858: | NM_173858:                                                                               |
| 8875   | VNN2                                   | vanin 2                                                                | -0.51 | CAGCAATAACTACCTGCTAA    | NM_004665: | NM_004665:NM_078488:                                                                     |
| 8875   | VNN2                                   | vanin 2                                                                | 0.75  | AGGAGCTTTGCTGCTATTTAA   | NM_004665: | NM_004665:NM_078488:                                                                     |
| 7441   | VPREB1                                 | pre-B lymphocyte gene 1                                                | -0.11 | AGACTGCATTAGGGAATTTAA   | NM_007128: | NM_007128:                                                                               |
| 7441   | VPREB1                                 | pre-B lymphocyte gene 1                                                | 0.02  | TCCAGGTTCCCTGCTGAGATA   | NM_007128: | NM_007128:                                                                               |
| 29802  | VPREB3                                 | pre-B lymphocyte gene 3                                                | 0.75  | AAATGGGTTAATAATTTCAA    | NM_013378: | NM_013378:                                                                               |
| 29802  | VPREB3                                 | pre-B lymphocyte gene 3                                                | 1.42  | TGGGTTAATAATTTCAACAT    | NM_013378: | NM_013378:                                                                               |
| 55823  | VPS11                                  | vacuolar protein sorting 11 (yeast)                                    | 0.59  | AAGGACTTTGACTGATTAT     | NM_021729: | NM_021729:                                                                               |
| 55823  | VPS11                                  | vacuolar protein sorting 11 (yeast)                                    | 0.65  | CAGCAATATATCCGAACCAT    | NM_021729: | NM_021729:                                                                               |
| 64601  | VPS16                                  | vacuolar protein sorting 16 (yeast)                                    | 0.45  | GAGGCCAGTGCCTGATATATA   | NM_022575: | NM_080413:NM_022575:                                                                     |
| 64601  | VPS16                                  | vacuolar protein sorting 16 (yeast)                                    | -1.78 | CAGCATGGACTGGACCTGAA    | NM_022575: | NM_080413:NM_022575:                                                                     |
| 23339  | VPS39                                  | vacuolar protein sorting 39 (yeast)                                    | -0.38 | CAGGATGATCTCACCGTGGTA   | NM_015289: | NM_015289:                                                                               |
| 23339  | VPS39                                  | vacuolar protein sorting 39 (yeast)                                    | -0.27 | ACGGTTCATCAAGTGCTCAA    | NM_015289: | NM_015289:                                                                               |
| 27072  | VPS41                                  | vacuolar protein sorting 41 (yeast)                                    | -0.73 | CACCATTATGTTACTAATCA    | NM_014396: | NM_014396:NM_080631:                                                                     |
| 27072  | VPS41                                  | vacuolar protein sorting 41 (yeast)                                    | 1.60  | TGGCTCATTCTTATATAGTA    | NM_014396: | NM_014396:NM_080631:                                                                     |
| 7443   | VRK1                                   | vaccinia related kinase 1                                              | 0.94  | CAGGTATACCTCTTAAGTTA    | NM_003384: | NM_003384:                                                                               |
| 7443   | VRK1                                   | vaccinia related kinase 1                                              | 0.91  | CCAGGTGTACTGGTAGATTA    | NM_003384: | NM_003384:                                                                               |
| 7444   | VRK2 (vaccin vaccinia related kinase 2 |                                                                        | -0.64 | CACACAATAGGTTAATCGAAA   | NM_006296: | NM_006296:                                                                               |
| 7444   | VRK2 (vaccin vaccinia related kinase 2 |                                                                        | -2.11 | CTGGAGGATTTGGATTGATAT   | NM_006296: | NM_006296:                                                                               |
| 51231  | VRK3 (vaccin vaccinia related kinase 3 |                                                                        | 0.01  | AACCGAGGCTTCTCTATGAA    | NM_016440: | NM_001025778:NM_016440:                                                                  |
| 51231  | VRK3 (vaccin vaccinia related kinase 3 |                                                                        | -3.12 | CTCACTAACTGGATGCCAA     | NM_016440: | NM_001025778:NM_016440:                                                                  |
| 23584  | VSIG2                                  | V-set and immunoglobulin domain containing 2                           | 0.01  | ATCCAACTGGTTCTAAGTCAA   | NM_014312: | NM_014312:                                                                               |
| 23584  | VSIG2                                  | V-set and immunoglobulin domain containing 2                           | 0.36  | CCCACAGATTTCTACACCAA    | NM_014312: | NM_014312:                                                                               |
| 7447   | VSNL1                                  | visinin-like 1                                                         | 0.72  | AGCGTTTACCGAATTAATAA    | NM_003385: | NM_003385:                                                                               |
| 7447   | VSNL1                                  | visinin-like 1                                                         | 0.16  | CAGAGACGGCTTAAAGCGTTA   | NM_003385: | NM_003385:                                                                               |
| 10490  | VTI1B                                  | vesicle transport through interaction with t-SNAREs homolog 1B (yeas   | -0.61 | CAGTATGATATACCAAGGTAA   | NM_006370: | NM_006370:                                                                               |
| 10490  | VTI1B                                  | vesicle transport through interaction with t-SNAREs homolog 1B (yeas   | 1.03  | AAGGTAATAAATGCTGTTTAT   | NM_006370: | NM_006370:                                                                               |

|        |         |                                                                      |        |                        |            |                                                                                                                          |
|--------|---------|----------------------------------------------------------------------|--------|------------------------|------------|--------------------------------------------------------------------------------------------------------------------------|
| 10490  | VT1B    | vesicle transport through interaction with t-SNAREs homolog 1B (yeas | -2.63  | AAGCAACAGGAAGCAATGAA   | XM_371718: | NM_006370:XM_371718:                                                                                                     |
| 7448   | VTN     | vitronectin                                                          | -1.18  | CAGCCCAATAAAGGTCCCTTA  | NM_000638: | NM_000638:                                                                                                               |
| 7448   | VTN     | vitronectin                                                          | -4.30  | CCAGTTCATGTAATCTCCCAA  | NM_000638: | NM_000638:                                                                                                               |
| 7450   | VWF     | von Willebrand factor                                                | -2.71  | AAGGGACGAGATCGTTAGCTA  | NM_000542: | NM_000552:                                                                                                               |
| 7450   | VWF     | von Willebrand factor                                                | -3.15  | ACGGCTTGACCATTACGCTA   | NM_000542: | NM_000552:                                                                                                               |
| 7450   | VWF     | von Willebrand factor                                                | -1.85  | ACGGCTTGACCATTACGCTA   | NM_000552: | NM_000552:                                                                                                               |
| 7450   | VWF     | von Willebrand factor                                                | -5.60  | CCCACCATCTCTGGTCTACAA  | NM_000552: | NM_000552:                                                                                                               |
| 7453   | WARS    | tryptophanyl-tRNA synthetase                                         | 0.73   | AGGGTTCCAAGTATACTCTTA  | NM_004184: | NM_213646:NM_213645:NM_173701:NM_004184:                                                                                 |
| 7453   | WARS    | tryptophanyl-tRNA synthetase                                         | -4.54  | CAGGTTCTTGATGCCTATGAA  | NM_004184: | NM_213646:NM_213645:NM_173701:NM_004184:                                                                                 |
| 10352  | WARS2   | tryptophanyl tRNA synthetase 2 (mitochondrial)                       | -1.67  | AAGGTAGATCTATCAAGCCAA  | NM_015836: | NM_201263:NM_015836:                                                                                                     |
| 10352  | WARS2   | tryptophanyl tRNA synthetase 2 (mitochondrial)                       | 0.62   | GCCAATGGATGCGAACTTAAA  | NM_015836: | NM_201263:NM_015836:                                                                                                     |
| 7454   | WAS     | Wiskott-Aldrich syndrome (eczema-thrombocytopenia)                   | 0.68   | ACGCCGAGACCTCAAACCTA   | NM_000377: | NM_000377:                                                                                                               |
| 7454   | WAS     | Wiskott-Aldrich syndrome (eczema-thrombocytopenia)                   | -3.11  | CCGGCAGGGAAATCAGCTGAA  | NM_000377: | NM_000377:                                                                                                               |
| 8936   | WASF1   | WAS protein family, member 1                                         | 0.34   | CAAGAAGCTGTGGACCGTTTA  | NM_003931: | NM_003931:NM_01024934:NM_001024935:NM_01024936:                                                                          |
| 8936   | WASF1   | WAS protein family, member 1                                         | 1.22   | GCCTATAACCGATTAAATTA   | NM_003931: | NM_003931:NM_01024934:                                                                                                   |
| 10163  | WASF2   | WAS protein family, member 2                                         | -1.19  | TAGGATTAGATCATTAGCTCA  | NM_006990: | NM_006990:                                                                                                               |
| 10163  | WASF2   | WAS protein family, member 2                                         | 0.18   | TGGTTTGGTAATGATCTGGAA  | NM_006990: | NM_006990:                                                                                                               |
| 10810  | WASF3   | WAS protein family, member 3                                         | 0.11   | CACCCTAGGCTGTCACTATA   | NM_006646: | NM_006646:                                                                                                               |
| 10810  | WASF3   | WAS protein family, member 3                                         | -0.06  | TCGAATGGGAATTCACCTGAA  | NM_006646: | NM_006646:                                                                                                               |
| 8976   | WASL    | Wiskott-Aldrich syndrome-like                                        | 0.45   | AACCTTAATGTAATTTACTTA  | NM_003941: | NM_003941:                                                                                                               |
| 8976   | WASL    | Wiskott-Aldrich syndrome-like                                        | 1.13   | CAGATACGACAGGGTATCCAA  | NM_003941: | NM_003941:                                                                                                               |
| 114049 | WBSR22  | Williams Beuren syndrome chromosome region 22                        | -3.51  | CAGGGAGTCTGTGTTCCACCA  | NM_017528: | NM_017528:                                                                                                               |
| 114049 | WBSR22  | Williams Beuren syndrome chromosome region 22                        | -5.30  | CCCTAACAGTGCCAAAGCAAA  | NM_017528: | NM_017528:                                                                                                               |
| 11169  | WDHD1   | WD repeat and HMG-box DNA binding protein 1                          | -1.18  | CAGGTAGTATTAAATGGTCTAA | NM_007086: | NM_007086:NM_001008396:                                                                                                  |
| 11169  | WDHD1   | WD repeat and HMG-box DNA binding protein 1                          | 2.91   | CTGCACCTTAGTCGAAGTACAA | NM_007086: | NM_007086:NM_001008396:                                                                                                  |
| 84219  | WDR24   | WD repeat domain 24                                                  | 1.15   | TCGGTGGAAAGTCAGACATGAA | NM_032259: | NM_032259:                                                                                                               |
| 84219  | WDR24   | WD repeat domain 24                                                  | -0.01  | CCGTAGCATCTTCAAGATCTA  | NM_032259: | NM_032259:                                                                                                               |
| 10885  | WDR3    | WD repeat domain 3                                                   | -3.03  | CCGGGATGTTATCGGCTTCAA  | NM_006784: | NM_006784:                                                                                                               |
| 10885  | WDR3    | WD repeat domain 3                                                   | -1.38  | TCGGCTGATAGGAATGTGAAA  | NM_006784: | NM_006784:                                                                                                               |
| 9277   | WDR46   | WD repeat domain 46                                                  | -1.89  | TGCCCTTGATTGGGTAACAAA  | NM_005452: | NM_005452:                                                                                                               |
| 9277   | WDR46   | WD repeat domain 46                                                  | -1.42  | CCGAAAGCTACACACTTCTAA  | NM_005452: | NM_005452:                                                                                                               |
| 11091  | WDR5    | WD repeat domain 5                                                   | -1.43  | CCCGAAGAGAGACTGTCCGGAA | NM_017588: | NM_017588:NM_052821:                                                                                                     |
| 11091  | WDR5    | WD repeat domain 5                                                   | 0.48   | GACCACCAGAAAGTCTTAAA   | NM_017588: | NM_017588:NM_052821:                                                                                                     |
| 25886  | WDR5A   | WD repeat domain 51A                                                 | -0.28  | CCGGGAATGTGTCCACTCGTA  | NM_015426: | NM_015426:                                                                                                               |
| 25886  | WDR5A   | WD repeat domain 51A                                                 | -1.88  | CTCCAGTGACTCAACCCTGAA  | NM_015426: | NM_015426:                                                                                                               |
| 54554  | WDR5B   | WD repeat domain 5B                                                  | 0.77   | ATCAGAGTACTAGTAGGGTA   | NM_019069: | NM_019069:                                                                                                               |
| 54554  | WDR5B   | WD repeat domain 5B                                                  | 0.39   | TAGCACAATAATTTAACTGAA  | NM_019069: | NM_019069:                                                                                                               |
| 151525 | WDSUB1  | WD repeat, sterile alpha motif and U-box domain containing 1         | -4.06  | TGCGATCAGTGGCTATTTCAT  | NM_152528: | NM_152528:                                                                                                               |
| 151525 | WDSUB1  | WD repeat, sterile alpha motif and U-box domain containing 1         | 0.56   | AACATCAGCTGAAGCAATTTA  | NM_152528: | NM_152528:                                                                                                               |
| 7465   | WEE1    | WEE1 homolog (S. pombe)                                              | -12.45 | CAGGGTAGATTACCTCGGATA  | NM_003390: | NM_003390:                                                                                                               |
| 7465   | WEE1    | WEE1 homolog (S. pombe)                                              | -1.18  | TACCTGTGTCCATCTTTATA   | NM_003390: | NM_003390:                                                                                                               |
| 7466   | WFS1    | Wolfram syndrome 1 (wolframin)                                       | 0.04   | TGCGCTTAAGCTGTGCGCAA   | NM_006005: | NM_006005:                                                                                                               |
| 7466   | WFS1    | Wolfram syndrome 1 (wolframin)                                       | 0.02   | CCGGTGACTGACATCGACAA   | NM_006005: | NM_006005:                                                                                                               |
| 7468   | WHSC1   | Wolf-Hirschhorn syndrome candidate 1                                 | -6.72  | CTGGATGGAATTTAGCATCAA  | NM_007331: | NM_133331:NM_133332:NM_014919:NM_133333:NM_133334:NM_133330:NM_133335:NM_007331:NM_133331:NM_133332:NM_014919:NM_133333: |
| 7468   | WHSC1   | Wolf-Hirschhorn syndrome candidate 1                                 | 0.10   | CAGAGTGTCTAAGAACGGAA   | NM_007331: | NM_133330:NM_007331:                                                                                                     |
| 54904  | WHSC1L1 | Wolf-Hirschhorn syndrome candidate 1-like 1                          | 0.01   | CACGAGAACAGTGAACATAAT  | NM_023034: | NM_023034:                                                                                                               |
| 54904  | WHSC1L1 | Wolf-Hirschhorn syndrome candidate 1-like 1                          | -2.53  | CCGGATGCTCCTAAGCATAGAA | NM_023034: | NM_023034:                                                                                                               |
| 11197  | WIF1    | WNT inhibitory factor 1                                              | 0.26   | AAGCAATATAATATTGTAA    | NM_007191: | NM_007191:                                                                                                               |
| 11197  | WIF1    | WNT inhibitory factor 1                                              | 0.14   | TTGCATTGGCTGAAGCAATA   | NM_007191: | NM_007191:                                                                                                               |
| 147179 | WIRE    | WIRE protein                                                         | 0.81   | CCCGCTACAACAGAGAGAAA   | NM_133264: | NM_133264:                                                                                                               |
| 147179 | WIRE    | WIRE protein                                                         | 0.88   | CAGGTATATTATTTTCATCA   | NM_133264: | NM_133264:                                                                                                               |
| 8840   | WISP1   | WNT1 inducible signaling pathway protein 1                           | -0.74  | CCGGTTGTTTGAAGACAGAAA  | NM_003882: | NM_003882:                                                                                                               |
| 8840   | WISP1   | WNT1 inducible signaling pathway protein 1                           | 0.90   | TAGATGGAATTTGGAACAATA  | NM_003882: | NM_003882:                                                                                                               |
| 8839   | WISP2   | WNT1 inducible signaling pathway protein 2                           | -0.63  | ATGGGACAAGCAGTCCCTTAA  | NM_003881: | NM_003881:                                                                                                               |
| 8839   | WISP2   | WNT1 inducible signaling pathway protein 2                           | 0.04   | CATGACAGAACCAATATTA    | NM_003881: | NM_003881:                                                                                                               |
| 8838   | WISP3   | WNT1 inducible signaling pathway protein 3                           | -0.76  | CAGCAATATAAAGACAAAT    | NM_003880: | NM_003880:NM_198239:NM_130396:                                                                                           |
| 8838   | WISP3   | WNT1 inducible signaling pathway protein 3                           | 0.60   | CAGCCTTGGCAGACAAATATA  | NM_003880: | NM_003880:NM_198239:NM_130396:                                                                                           |
| 51352  | WIT1    | Wilms tumor upstream neighbor 1                                      | 0.77   | CAGTCTGAGGTTACAATTAGA  | NM_015855: | NM_015855:                                                                                                               |
| 51352  | WIT1    | Wilms tumor upstream neighbor 1                                      | -1.06  | TAGGCCCATGAAATTTGATGAA | NM_015855: | NM_015855:                                                                                                               |
| 65125  | WNK1    | WNK lysine deficient protein kinase 1                                | -0.01  | CTAGAGGATCTTGATGCTCAA  | NM_018979: | NM_018979:                                                                                                               |
| 65125  | WNK1    | WNK lysine deficient protein kinase 1                                | -1.14  | CTGCGACGACTACGAGATAAA  | NM_018979: | NM_018979:                                                                                                               |
| 65268  | WNK2    | WNK lysine deficient protein kinase 2                                | 1.09   | AACGTTATCTGAGCAGATGAA  | NM_006648: | NM_006648:                                                                                                               |
| 65268  | WNK2    | WNK lysine deficient protein kinase 2                                | 0.36   | ACCTATAAGTCTAGTAGCAAA  | NM_006648: | NM_006648:                                                                                                               |
| 65267  | WNK3    | WNK lysine deficient protein kinase 3                                | -0.26  | AAGATTGGTGATCTAGGATTA  | NM_020922: | NM_001002838:NM_020922:                                                                                                  |
| 65267  | WNK3    | WNK lysine deficient protein kinase 3                                | -0.28  | CCGGGTGACGCGCAATAAAGAA | NM_020922: | NM_001002838:NM_020922:                                                                                                  |
| 65266  | WNK4    | WNK lysine deficient protein kinase 4                                | -4.90  | CAGCTTGTGGGCGTTTCCAA   | NM_032387: | NM_032387:                                                                                                               |
| 65266  | WNK4    | WNK lysine deficient protein kinase 4                                | -0.81  | CAGGAGGAGCCGACACCATTA  | NM_032387: | NM_032387:                                                                                                               |
| 7471   | WNT1    | wingless-type MMTV integration site family, member 1                 | 0.67   | AACGGCGTTTATCTTCGCTAT  | NM_005430: | NM_005430:                                                                                                               |
| 7471   | WNT1    | wingless-type MMTV integration site family, member 1                 | 0.17   | CAGCGGCGTCTGATACGCCAA  | NM_005430: | NM_005430:                                                                                                               |
| 7480   | WNT10B  | wingless-type MMTV integration site family, member 10B               | 1.48   | ACGAATGCGAATCCACAACAA  | NM_003394: | NM_003394:                                                                                                               |
| 7480   | WNT10B  | wingless-type MMTV integration site family, member 10B               | -0.96  | CAGGATCGGCTGAGGGCCAAA  | NM_003394: | NM_003394:                                                                                                               |
| 7473   | WNT3    | wingless-type MMTV integration site family, member 3                 | -1.61  | CCGCAATTACATCGAGATCAT  | NM_030753: | NM_030753:                                                                                                               |
| 7473   | WNT3    | wingless-type MMTV integration site family, member 3                 | -1.63  | CGGCTGTGACTCGCATCAATA  | NM_030753: | NM_030753:                                                                                                               |
| 89780  | WNT3A   | wingless-type MMTV integration site family, member 3A                | -0.79  | ACCGCCATCCTCTGCCTCAA   | NM_033131: | NM_033131:                                                                                                               |
| 89780  | WNT3A   | wingless-type MMTV integration site family, member 3A                | -1.73  | CCCGACTGTGCTGCTCGGAA   | NM_033131: | NM_033131:                                                                                                               |
| 54361  | WNT4    | wingless-type MMTV integration site family, member 4                 | -1.34  | CAGACCTAAGGTGGAGTAA    | NM_030761: | NM_030761:                                                                                                               |
| 54361  | WNT4    | wingless-type MMTV integration site family, member 4                 | 0.31   | CTCATGTTATTTTGGCGGAA   | NM_030761: | NM_030761:                                                                                                               |
| 7474   | WNT5A   | wingless-type MMTV integration site family, member 5A                | -0.04  | CACACAACCTTACACTTTAA   | NM_003392: | NM_003392:                                                                                                               |
| 7474   | WNT5A   | wingless-type MMTV integration site family, member 5A                | 0.49   | CCGGCTCGCAGAGAATGAAA   | NM_003392: | NM_003392:                                                                                                               |
| 7476   | WNT7A   | wingless-type MMTV integration site family, member 7A                | 0.31   | CAGCAATATTTAAACATTTA   | NM_004625: | NM_004625:                                                                                                               |
| 7476   | WNT7A   | wingless-type MMTV integration site family, member 7A                | -1.44  | CCGAAAGATCCTGGAGGAGAA  | NM_004625: | NM_004625:                                                                                                               |
| 7486   | WRN     | Werner syndrome                                                      | 0.29   | ATGGAGATGCTTAAAGCATTA  | NM_000553: | NM_000553:                                                                                                               |
| 7486   | WRN     | Werner syndrome                                                      | 0.81   | CGGATTGTATACGTAACCTCA  | NM_000553: | NM_000553:                                                                                                               |
| 26118  | WSB1    | WD repeat and SOCS box-containing 1                                  | -0.14  | CTAGTTTACCTTGGTGATA    | NM_015626: | NM_134264:NM_134265:NM_015626:                                                                                           |
| 26118  | WSB1    | WD repeat and SOCS box-containing 1                                  | 0.01   | ACCGTGGGTACTACTCTGAT   | NM_015626: | NM_134264:NM_134265:NM_015626:                                                                                           |
| 55884  | WSB2    | WD repeat and SOCS box-containing 2                                  | 0.38   | AAAGATGCTTAATTTGGTAA   | NM_018639: | NM_018639:                                                                                                               |
| 55884  | WSB2    | WD repeat and SOCS box-containing 2                                  | -3.27  | CACGGCTCTTACGATACCAA   | NM_018639: | NM_018639:                                                                                                               |
| 7490   | WT1     | Wilms tumor 1                                                        | 0.60   | AAGAAATAAATCAGAGAGCAA  | NM_000378: | NM_024425:NM_024426:NM_000378:NM_024424:                                                                                 |
| 7490   | WT1     | Wilms tumor 1                                                        | 0.73   | AGGGAGGGAATTTATTATTTA  | NM_000378: | NM_024425:NM_024426:NM_000378:NM_024424:                                                                                 |
| 9589   | WTAP    | Wilms tumor 1 associated protein                                     | -0.47  | ATGCAAGAGTGACTACTCTCAA | NM_004906: | NM_152858:NM_152857:NM_004906:                                                                                           |
| 9589   | WTAP    | Wilms tumor 1 associated protein                                     | -0.15  | CAGACTAAGACAAACTGGAA   | NM_004906: | NM_152858:NM_152857:NM_004906:                                                                                           |

|       |            |                                                    |       |                        |            |                                 |
|-------|------------|----------------------------------------------------|-------|------------------------|------------|---------------------------------|
| 51741 | WVOX       | WW domain containing oxidoreductase                | 0.32  | TTGGGCGATGCTGGCTTATAA  | NM_016373: | NM_016373:NM_018560:            |
| 51741 | WVOX       | WW domain containing oxidoreductase                | 0.10  | CCCATCGATTTACAGATATTA  | NM_016373: | NM_016373:NM_018560:            |
| 11060 | WWP2       | WW domain containing E3 ubiquitin protein ligase 2 | 0.75  | CAGCCAATGAAGGTTTGCTCTA | NM_007014: | NM_199424:NM_007014:            |
| 11060 | WWP2       | WW domain containing E3 ubiquitin protein ligase 2 | 0.57  | CTCACCTACTTTTCGCTTATA  | NM_007014: | NM_199424:NM_007014:            |
| 25937 | WWTR1      | WW domain containing transcription regulator 1     | 2.97  | ACAGTAGTACCAAAATGCTTTA | NM_015472: | NM_015472:                      |
| 25937 | WWTR1      | WW domain containing transcription regulator 1     | 3.01  | CTGCGTTCTTGTCACAGATTA  | NM_015472: | NM_015472:                      |
| 56949 | XAB2       | XPA binding protein 2                              | -0.66 | CACGTACAACACGCAGGTCAA  | NM_020196: | NM_020196:                      |
| 56949 | XAB2       | XPA binding protein 2                              | -6.32 | CCGCGTGTACAAAGTCACTGAA | NM_020196: | NM_020196:                      |
| 6375  | XCL1       | chemokine (C motif) ligand 1                       | 0.99  | AAGAACTTTATTCAAGTAAA   | NM_002995: | NM_002995:                      |
| 6375  | XCL1       | chemokine (C motif) ligand 1                       | -2.52 | ACCCCTTGAATTGGACAATAA  | NM_002995: | NM_002995:                      |
| 2829  | XCR1       | chemokine (C motif) receptor 1                     | 0.86  | CTGGGAGACTTCCTCTGCAAAA | NM_005283: | NM_001024644:NM_005283:         |
| 2829  | XCR1       | chemokine (C motif) receptor 1                     | 0.53  | TCGGGCTGTGATTATTCGGAA  | NM_005283: | NM_001024644:NM_005283:         |
| 7498  | XDH        | xanthine dehydrogenase                             | -0.06 | ACAGGTAATAACGTGAAGGAA  | NM_000379: | NM_000379:                      |
| 7498  | XDH        | xanthine dehydrogenase                             | -0.30 | CCGGATTGGTGTGAGTGAA    | NM_000379: | NM_000379:                      |
| 10894 | XLKD1      | extracellular link domain containing 1             | -1.36 | AACACTAAACTGCAACACAAA  | NM_006691: | NM_006691:                      |
| 10894 | XLKD1      | extracellular link domain containing 1             | 1.02  | ATGAGATTCTCAACTTTGA    | NM_006691: | NM_006691:                      |
|       | XM_018432: |                                                    | -1.19 | CTGCAGTCGTTCCGACACAAA  | XM_018432: | XM_018432:                      |
|       | XM_018432: |                                                    | -6.87 | CAGTATGAACCTACTGTCAAA  | XM_018432: | XM_018432:                      |
|       | XM_039393: |                                                    | -1.28 | CAGGTTTGCCCTCGGAGATGAA | XM_039393: | XM_039393:XM_379927:            |
|       | XM_039393: |                                                    | -0.70 | CAGCCCTTAGTGATGGTTA    | XM_039393: | XM_039393:XM_379927:            |
|       | XM_047083: |                                                    | -3.67 | CAGCATCTAGGGCATTATCCA  | XM_047083: | XM_047083:                      |
|       | XM_051264: |                                                    | -7.32 | CCGGTGGTGATCTTCAGCAA   | XM_051264: | XM_051264:                      |
|       | XM_051264: |                                                    | 0.17  | CACGACTTGGAAATCACAAA   | XM_051264: | XM_051264:                      |
|       | XM_059923: |                                                    | 0.66  | AAAGGATTTAATAAATTTAA   | XM_059923: | XM_059923:                      |
|       | XM_059923: |                                                    | -0.59 | CTGGAAGAAAGTTTGACGAAA  | XM_059923: | XM_059923:                      |
|       | XM_061864: |                                                    | 0.60  | CCGATAGATGTGGAATACAAA  | XM_061864: | XM_061864:                      |
|       | XM_061864: |                                                    | -0.77 | TACGATGTGAGCATAAAGTAA  | XM_061864: | XM_061864:                      |
|       | XM_070277: |                                                    | -1.50 | CCCGAGGAATTTGAGTCTTA   | XM_070277: | XM_070277:                      |
|       | XM_070277: |                                                    | -0.61 | CAGCAAGAAGATCATATGTGA  | XM_070277: | XM_070277:                      |
|       | XM_086725: |                                                    | 0.32  | TTGCTCTAATATATTCTAAGA  | XM_086725: | XM_086725:                      |
|       | XM_086725: |                                                    | 0.19  | CTGCTGTGATTGTGCTGAT    | XM_086725: | XM_086725:                      |
|       | XM_208545: |                                                    | -5.17 | TTGGAACGGATGAAGCATTTA  | XM_208545: | XM_208545:                      |
|       | XM_209616: |                                                    | 0.11  | GACATCTTAATTACAGGTTAA  | XM_209616: | XM_209616:                      |
|       | XM_209616: |                                                    | -0.43 | TGGCAGCTACTGCAAGGTTAA  | XM_209616: | XM_209616:                      |
|       | XM_211557: |                                                    | 0.70  | AACCCTCAGGTTATTACAGTA  | XM_211557: | XM_211557:                      |
|       | XM_211557: |                                                    | -0.08 | CAGTATTACAGCAAACTGAAA  | XM_211557: | XM_211557:                      |
|       | XM_290780: |                                                    | 3.65  | CAGAAGGAGATCAACGACCAA  | XM_290780: | XM_290780:                      |
|       | XM_290780: |                                                    | -5.12 | CACAGCAAGTTGGCATCTAAA  | XM_290780: | XM_290780:                      |
|       | XM_290822: |                                                    | 1.79  | TACCTCGAGTATGGCTGAAA   | XM_290822: | XM_290822:                      |
|       | XM_290822: |                                                    | -1.83 | ACGGCAGGAAATCAGGAAA    | XM_290822: | XM_290822:                      |
|       | XM_290866: |                                                    | 0.89  | AGCCTGTGTGATGATGCTCTA  | XM_290866: | XM_290866:                      |
|       | XM_290866: |                                                    | 0.28  | TCCAGGAAATGGATGATAAT   | XM_290866: | XM_290866:                      |
|       | XM_291105: |                                                    | 0.10  | AACCCATTGTACAAGTTCAA   | XM_291105: | XM_291105:                      |
|       | XM_291105: |                                                    | -3.09 | CCGGCAAAACGGGATCACCAA  | XM_291105: | XM_291105:                      |
|       | XM_291141: |                                                    | -2.06 | ACGATACTCCTTGAATTACA   | XM_291141: | XM_291141:                      |
|       | XM_291141: |                                                    | 0.46  | ACCTATTAATTTAGAAGAGAA  | XM_291141: | XM_291141:                      |
|       | XM_292027: |                                                    | -0.20 | ATGATGCATATCTTATGTCAA  | XM_292027: | XM_292027:                      |
|       | XM_292027: |                                                    | -3.05 | TGGCATGAGCATAAATACAAA  | XM_292027: | XM_292027:                      |
|       | XM_293360: |                                                    | 0.01  | TCGCTCATAGTTAGTCTTGCA  | XM_293360: | XM_293360:                      |
|       | XM_293360: |                                                    | 0.89  | TAGAGACTGCTTAATCTTTGA  | XM_293360: | XM_293360:                      |
|       | XM_370621: |                                                    | 0.19  | AAGAATACGAATGACAATATA  | XM_370621: | XM_370621:                      |
|       | XM_370621: |                                                    | 0.70  | CACGATGAGCCAACAGTCATA  | XM_370621: | XM_370621:                      |
|       | XM_370639: |                                                    | -0.01 | CCCAACAATAGAGAATGTA    | XM_370639: | XM_370639:                      |
|       | XM_370639: |                                                    | -3.79 | CAGAACAATAGTTAAACTTTA  | XM_370639: | XM_370639:                      |
|       | XM_370660: |                                                    | 0.02  | CCCGGATAGGACATATATGA   | XM_370660: | XM_370660:                      |
|       | XM_370660: |                                                    | 1.62  | GAGSACTCTCCGCCATTTA    | XM_370660: | XM_370660:                      |
|       | XM_370661: |                                                    | -1.54 | TCCATCGAATATATTCCAA    | XM_370661: | No hits found till 3 mismatches |
|       | XM_370716: |                                                    | -1.79 | CGCGATTTGCTCCTCATATA   | XM_370716: | XM_370716:                      |
|       | XM_370716: |                                                    | 0.84  | AACCAGGCAGTCGGAATGAAA  | XM_370716: | XM_370716:                      |
|       | XM_371145: |                                                    | -0.28 | CGCCTTCAGTACTTTCCACAA  | XM_371145: | XM_371145:                      |
|       | XM_371145: |                                                    | 0.48  | CGGGAACCCAGTTTATGGGAAA | XM_371145: | XM_371145:                      |
|       | XM_371249: |                                                    | -1.00 | AAGAATGGAAGGATAAATATA  | XM_371249: | XM_371249:                      |
|       | XM_371249: |                                                    | 0.74  | CAGTTATCTTTCCACAATAA   | XM_371249: | XM_371249:                      |
|       | XM_371663: |                                                    | 0.50  | AAGGAACAACGTATCTTATA   | XM_371663: | XM_371663:                      |
|       | XM_371663: |                                                    | 0.72  | CACACAGTATTTGTTTCTTCA  | XM_371663: | XM_371663:                      |
|       | XM_371718: |                                                    | 0.02  | CACCAAGAGTAGAGTATAAA   | XM_371718: | XM_371718:                      |
|       | XM_371837: |                                                    | -0.63 | CAGGGTCCATGATGGGTCAA   | XM_371837: | XM_371837:                      |
|       | XM_371837: |                                                    | -0.92 | CAGCAGTACCTGATGATCAA   | XM_371837: | XM_371837:                      |
|       | XM_372092: |                                                    | 0.75  | CACGTACACCGGGAGCGCAA   | XM_372092: | XM_372092:                      |
|       | XM_372092: |                                                    | -0.57 | CCACGAGAGATGACAGCCAA   | XM_372092: | XM_372092:                      |
|       | XM_372121: |                                                    | 0.85  | TAGATCATCAGAGTATCATA   | XM_372121: | XM_372121:                      |
|       | XM_372121: |                                                    | -0.28 | ATGGAACAAGACTTCTCTGAA  | XM_372121: | XM_372121:                      |
|       | XM_372128: |                                                    | -1.01 | TACATCTAGTAAGCATCTTA   | XM_372128: | XM_372128:                      |
|       | XM_372128: |                                                    | 0.32  | TAGTTTAAATATACAATAA    | XM_372128: | XM_372128:                      |
|       | XM_372254: |                                                    | 0.98  | AGGCCCAAATTAGAAAGTTA   | XM_372254: | XM_372254:                      |
|       | XM_372254: |                                                    | -0.24 | TAGAAAGTTATGACTGTGATA  | XM_372254: | XM_372254:                      |
|       | XM_372323: |                                                    | -0.80 | AAGTTGTTATCTTTATTGAT   | XM_372323: | XM_372323:                      |
|       | XM_372323: |                                                    | 0.00  | CAGCCAGAGACAAGAAGGTA   | XM_372323: | XM_372323:                      |
|       | XM_372329: |                                                    | -0.69 | AGGGAAGAGGACGAATCTCTA  | XM_372329: | XM_372329:                      |
|       | XM_372329: |                                                    | 0.48  | CACCAGACACATTACTCACAA  | XM_372329: | XM_372329:                      |
|       | XM_372424: |                                                    | -0.78 | CACCTGTACTCAATCTTA     | XM_372424: | XM_372424:                      |
|       | XM_372424: |                                                    | -0.32 | ACCCAGACTATGTGTCATTA   | XM_372424: | XM_372424:                      |
|       | XM_372639: |                                                    | 0.66  | TGGATTTAACAGGAAGGAAAT  | XM_372639: | XM_372639:                      |
|       | XM_372639: |                                                    | -1.07 | AAGACGTTCCCTGAAGCAGAA  | XM_372639: | XM_372639:                      |
|       | XM_372663: |                                                    | -1.27 | TTGGAGTTCTTTTGGAGAA    | XM_372663: | XM_372663:                      |
|       | XM_372663: |                                                    | -5.57 | CACGTTGTGAGACTGAACTAA  | XM_372663: | XM_372663:                      |
|       | XM_373038  |                                                    | 2.05  | ACAGCACATCGTAAACTTATA  | XM_373038  | No hits found till 3 mismatches |
|       | XM_373097: |                                                    | 0.47  | CTGACAGGGATTAATGGAA    | XM_373097: | XM_373097:                      |
|       | XM_373097: |                                                    | -1.15 | ACCCTAATTTGAACAGCTTTA  | XM_373097: | XM_373097:                      |
|       | XM_373156  |                                                    | 0.03  | AAGAATGATACGGGATTTCCA  | XM_373156  | No hits found till 3 mismatches |
|       | XM_373786: |                                                    | -2.08 | TAGCGTGTTCACCGAGTGAAA  | XM_373786: | XM_373786:                      |
|       | XM_373786: |                                                    | 0.02  | CAGGCTGTGACAGGCTCGGAA  | XM_373786: | XM_373786:                      |
|       | XM_374002: |                                                    | -1.49 | CACGTCGGTGGAACTCCTAAA  | XM_374002: | XM_374002:                      |
|       | XM_374002: |                                                    | 0.57  | CACGACGGTACGGTTATGCTA  | XM_374002: | XM_374002:                      |
|       | XM_374879: |                                                    | -0.36 | CAGCTGGGCTCAGCACAGTA   | XM_374879: | XM_374879:                      |
|       | XM_374879: |                                                    | -0.76 | CACCTTGGACAACCTCCAGAA  | XM_374879: | XM_374879:                      |
|       | XM_375344: |                                                    | -1.58 | CCAGCATTAGAATCATATTA   | XM_375344: | XM_375344:                      |
|       | XM_375619: |                                                    | 0.81  | TCCCTTGTGCTTGAACCTAA   | XM_375619: | XM_375619:                      |
|       | XM_375619: |                                                    | 0.99  | CAGAGAAGGTATCTGATCAAA  | XM_375619: | XM_375619:                      |

|            |            |                                                                      |                        |                       |                                                              |            |
|------------|------------|----------------------------------------------------------------------|------------------------|-----------------------|--------------------------------------------------------------|------------|
| XM_375714: |            | -0.01                                                                | CGAGCAGGACAATGATGCA    | XM_375714:            | XM_375714:                                                   |            |
| XM_375714: |            | -1.99                                                                | TGGGAGGAACTGCTCTGTGA   | XM_375714:            | XM_375714:                                                   |            |
| XM_375914: |            | 0.19                                                                 | CTGGGATTTATTGATCAACA   | XM_375914:            | XM_375914:                                                   |            |
| XM_375914: |            | 0.00                                                                 | TTCATACAGAATGGCACTAAA  | XM_375914:            | XM_375914:                                                   |            |
| XM_376001: |            | -2.99                                                                | GCCTCTACTAGCATGGATA    | XM_376001:            | XM_376001:                                                   |            |
| XM_376001: |            | -0.06                                                                | CTGACACTAGCTCGGCTTCA   | XM_376001:            | XM_376001:                                                   |            |
| XM_376684: |            | 0.36                                                                 | ACCCACAGTCTTCCCGATTA   | XM_376684:            | XM_379940:XM_376684:                                         |            |
| XM_376684: |            | 1.49                                                                 | TACGTGGAGGTTACTGATAAA  | XM_376684:            | XM_379940:XM_376684:                                         |            |
| XM_376888: |            | -0.73                                                                | CAGACTGGTTTGAAGGAAGAA  | XM_376888:            | XM_376888:                                                   |            |
| XM_377824: |            | 0.20                                                                 | TGGGACGGAGATGACAATGAA  | XM_377824:            | XM_377824:                                                   |            |
| XM_377824: |            | 0.88                                                                 | AAGAAACAAAGGCTGCAGCTAA | XM_377824:            | XM_377824:                                                   |            |
| XM_377925: |            | -0.01                                                                | CCAGATCTGAACGGCATGGAA  | XM_377925:            | XM_379986:XM_379225:                                         |            |
| XM_377925: |            | 0.43                                                                 | CACCCGCTCAATGACGCAGAA  | XM_377925:            | XM_379986:XM_379225:                                         |            |
| XM_379264: |            | 0.06                                                                 | CGGCAGGAAATCTCATCCAA   | XM_379264:            | XM_379264:                                                   |            |
| XM_379264: |            | -0.28                                                                | CAGGCTGAAGTGACCCCTCAA  | XM_379264:            | XM_379264:                                                   |            |
| XM_380143: |            | 0.06                                                                 | TTCCAAGTATTAATACACAA   | XM_380143:            | XM_380143:XM_379518:                                         |            |
| XM_380143: |            | -0.30                                                                | CTGCTGGGAGAAAGAAATGGAA | XM_380143:            | XM_380143:XM_379518:                                         |            |
| XM_495806: |            | 0.67                                                                 | TAGTATTCAATAGCATTAGA   | XM_495806:            | XM_495806:                                                   |            |
| XM_495806: |            | 0.16                                                                 | AAGATCGAGATCATGGCCAA   | XM_495806:            | XM_495806:                                                   |            |
| XM_495815: |            | 1.02                                                                 | TGGGATGTGCTTCAATCACCTA | XM_495815:            | XM_495815:                                                   |            |
| XM_495815: |            | -1.37                                                                | TTGGGTGGGCTGATTATAAT   | XM_495815:            | XM_495815:                                                   |            |
| XM_495872: |            | -0.05                                                                | TTGGCTCCTAATGTTTATAAA  | XM_495872:            | XM_495872:XM_370621:                                         |            |
| XM_495967: |            | 0.32                                                                 | CAGGCCTCAGATAGACGCCAA  | XM_495967:            | XM_378064:XM_495971:XM_497993:                               |            |
| XM_495967: |            | 0.35                                                                 | CAGCAACTTCACAACCCAGTA  | XM_495967:            | XM_495967:                                                   |            |
| XM_496123: |            | 0.03                                                                 | CTGGCTGTGAAGGACCCCTTTA | XM_496123:            | XM_496123:                                                   |            |
| XM_496123: |            | -4.01                                                                | CAAAAGAAATGTAGTTTATTTA | XM_496123:            | XM_496123:                                                   |            |
| XM_496151: |            | -0.07                                                                | AAGCCTGGAACGGTCCGAAA   | XM_496151:            | XM_496151:                                                   |            |
| XM_496151: |            | 0.38                                                                 | CTGGTTCCTAATAGCGGGAA   | XM_496151:            | XM_496151:                                                   |            |
| XM_496161: |            | -0.03                                                                | CGCGGGCTGTAGGCAAGAAA   | XM_496161:            | XM_496161:                                                   |            |
| XM_496161: |            | -1.93                                                                | ATGGACAAGAAGAAAGAGTAA  | XM_496161:            | XM_496151:XM_496161:                                         |            |
| XM_496165: |            | 0.69                                                                 | CTCCTACTTGTCAACCGGAAA  | XM_496165:            | XM_496165:                                                   |            |
| XM_496165: |            | -0.94                                                                | CTGGGACTCACTGTCCGACCA  | XM_496165:            | XM_496165:                                                   |            |
| XM_496291: |            | 0.60                                                                 | CTGAAGAACGGTGATCCTAAA  | XM_496291:            | XM_496291:                                                   |            |
| XM_496291: |            | -0.26                                                                | AAAGAAAGTTGTAGATGAGAA  | XM_496291:            | XM_496291:                                                   |            |
| XM_496404: |            | 0.86                                                                 | GTGCAATTCGTGAGAACTTAA  | XM_496404:            | XM_496404:                                                   |            |
| XM_496404: |            | 0.25                                                                 | AGGAATGAACATAAGTTTCTA  | XM_496404:            | XM_496404:                                                   |            |
| XM_496405: |            | 0.07                                                                 | TAGCATTAAGTTGCTTGACTA  | XM_496405:            | XM_496405:                                                   |            |
| XM_496405: |            | -1.70                                                                | CTGCAACTTAGCCATGACCTA  | XM_496405:            | XM_496405:                                                   |            |
| XM_496434: |            | 0.26                                                                 | AACAGGAAATAGTGAATCTA   | XM_496434:            | XM_496434:                                                   |            |
| XM_496434: |            | 0.90                                                                 | CGGGACAGAAATCATCAATA   | XM_496434:            | XM_496434:                                                   |            |
| XM_496437: |            | -0.23                                                                | AAATTTTCATGATTGACTTAAA | XM_496437:            | XM_496437:                                                   |            |
| XM_496642: |            | 1.10                                                                 | ACCCTGATTATAACATTTATA  | XM_496642:            | No hits found till 3 mismatches                              |            |
| XM_496820: |            | 0.31                                                                 | TTGGAAGAGATTCCTTATAAA  | XM_496820:            | XM_496820:                                                   |            |
| XM_497211: |            | -0.25                                                                | ATGGCGGCTTCTTCAACAAA   | XM_497211:            | XM_497211:                                                   |            |
| XM_497211: |            | -0.04                                                                | TTGCCAAGAAATACAAATAGAA | XM_497211:            | XM_497211:                                                   |            |
| XM_497242: |            | 1.11                                                                 | CAGGAATACAGCCAAGGGAAA  | XM_497242:            | XM_497240:XM_497242:XM_497226:XM_497229:XM_497223:XM_497231: |            |
| XM_497249: |            | 0.27                                                                 | CAGCATGAGATACACCAACAA  | XM_497249:            | XM_497249:                                                   |            |
| XM_497249: |            | -0.40                                                                | CTCAATGACGTGTACAGTTTA  | XM_497249:            | XM_497249:                                                   |            |
| XM_497309: |            | 0.96                                                                 | CTGGCTGCAAAACGGCACTTTA | XM_497309:            | XM_497309:                                                   |            |
| XM_497353: |            | -0.05                                                                | CACATCTATACATTACGAAA   | XM_497353:            | XM_497353:                                                   |            |
| XM_497353: |            | 0.20                                                                 | CAGAGAAATCTGCCAACCGCAA | XM_497353:            | XM_497353:                                                   |            |
| XM_497509: |            | 0.10                                                                 | CCCTCGAGAGTTGGAAAGTCAA | XM_497509:            | XM_497509:                                                   |            |
| XM_497509: |            | -0.16                                                                | CCAGCCCGCTTTGGAAAGCGAA | XM_497509:            | XM_497509:                                                   |            |
| XM_497611: |            | -2.97                                                                | AAGCCGGAGTGCATAATGTAT  | XM_497611:            | XM_497611:                                                   |            |
| XM_497611: |            | 0.12                                                                 | CTCAGCCACCATTGCACCAAAA | XM_497611:            | XM_497611:                                                   |            |
| XM_497684: |            | -5.49                                                                | ATGTATAACGATGACCTAGAA  | XM_497684:            | XM_497684:                                                   |            |
| XM_497684: |            | 1.28                                                                 | TGCCACATTTGGTATCCTCTA  | XM_497684:            | XM_497684:                                                   |            |
| XM_497715: |            | 0.22                                                                 | CTGGATTTAACGGAAGTAATT  | XM_497715:            | XM_497715:                                                   |            |
| XM_497715: |            | 0.72                                                                 | CAGTTTCATTTGACTCCTCAA  | XM_497715:            | XM_497715:                                                   |            |
| XM_497791: |            | -0.19                                                                | ACAGTGGCCAACAGAGATTAA  | XM_497791:            | XM_497791:                                                   |            |
| XM_497793: |            | 0.16                                                                 | CCCGAAAGATGTGGGCTTAA   | XM_497793:            | XM_497793:                                                   |            |
| XM_497912: |            | -1.58                                                                | CCGGAAGTCCGCGGTTACTCAA | XM_497912:            | XM_497912:                                                   |            |
| XM_497912: |            | -2.18                                                                | CCCATCAGAGGACGACTCAA   | XM_497912:            | XM_497912:                                                   |            |
| XM_497921: |            | -1.26                                                                | CTCCAAGTTTCAGGAAGATAA  | XM_497921:            | XM_497921:                                                   |            |
| XM_497921: |            | -2.87                                                                | AACAGTGGGCACATCAGCAAAA | XM_497921:            | XM_497921:                                                   |            |
| XM_498271: |            | -0.22                                                                | CTGCTCATGGTTACACTTTCA  | XM_498271:            | XM_498271:                                                   |            |
| XM_498271: |            | -4.06                                                                | AAGAGCCCTGCTCAAAGTTTA  | XM_498271:            | XM_498271:                                                   |            |
| XM_498294: |            | 0.47                                                                 | TGGGACAGTGTTCAGGCCAA   | XM_498294:            | XM_498294:                                                   |            |
| XM_498308: |            | -1.22                                                                | AGCCCTCAATTTCCGCTTCAA  | XM_498308:            | XM_498308:                                                   |            |
| XM_498308: |            | -7.80                                                                | CTGCCTAGTGAAGATCAGCAA  | XM_498308:            | XM_498308:                                                   |            |
| 7507       | XPA        | xeroderma pigmentosum, complementation group A                       | AAGAAATGGCGGAGCAGTAA   | NM_000380:            | NM_000380:                                                   |            |
| 7507       | XPA        | xeroderma pigmentosum, complementation group A                       | CTGATGATAAACACAAGCTTA  | NM_000380:            | NM_000380:                                                   |            |
| 7508       | XPC        | xeroderma pigmentosum, complementation group C                       | CCGGCTGGTATTGTCTCTACA  | NM_004628:            | NM_004628:                                                   |            |
| 7508       | XPC        | xeroderma pigmentosum, complementation group C                       | TAGCAAATGGCTTCTATCGAA  | NM_004628:            | NM_004628:                                                   |            |
| 7511       | XPNPEP1    | X-prolyl aminopeptidase (aminopeptidase P) 1, soluble                | CCGCACTCTTTGGCCAGTGA   | NM_020383:            | NM_020383:                                                   |            |
| 7511       | XPNPEP1    | X-prolyl aminopeptidase (aminopeptidase P) 1, soluble                | CCCGACTGGAACCAAAGGTCA  | NM_020383:            | NM_020383:                                                   |            |
| 7512       | XPNPEP2    | (X-X-prolyl aminopeptidase (aminopeptidase P) 2, membrane-bound      | CACAGCTACAATGCTTTAAA   | NM_003399:            | NM_003399:                                                   |            |
| 7512       | XPNPEP2    | (X-X-prolyl aminopeptidase (aminopeptidase P) 2, membrane-bound      | ATGGAACCCATGATTCCTAAA  | NM_003399:            | NM_003399:                                                   |            |
| 7514       | XPO1       | exportin 1 (CRM1 homolog, yeast)                                     | CAGCAAAGAATGGCTCAAGAA  | NM_003400:            | NM_003400:                                                   |            |
| 7514       | XPO1       | exportin 1 (CRM1 homolog, yeast)                                     | CCATTGTAAGGCGACTTCAA   | NM_003400:            | NM_003400:                                                   |            |
| 57510      | XPO5       | exportin 5                                                           | CTGTCTCGAATTGTAGTGGAA  | NM_020750:            | NM_020750:                                                   |            |
| 57510      | XPO5       | exportin 5                                                           | CCAGATGTTTGAACACTAAA   | NM_020750:            | NM_020750:                                                   |            |
| 23039      | XPO7       | exportin 7                                                           | CAAGCTTGTATCACGCACAAA  | NM_015024:            | NM_015024:                                                   |            |
| 23039      | XPO7       | exportin 7                                                           | AAGGCTGACATGGCTGGTTTA  | NM_015024:            | NM_015024:                                                   |            |
| 11260      | XPOT       | exportin, tRNA (nuclear export receptor for tRNAs)                   | AAGAGTTATCCTGAACCTTA   | NM_007235:            | NM_007235:                                                   |            |
| 11260      | XPOT       | exportin, tRNA (nuclear export receptor for tRNAs)                   | CACGCCTATTACAACCGAAA   | NM_007235:            | NM_007235:                                                   |            |
| 9213       | XPRI       | xenotropic and polytropic retrovirus receptor                        | 0.83                   | AAGGCTCGTACACTAAGGTA  | NM_004736:                                                   | NM_004736: |
| 9213       | XPRI       | xenotropic and polytropic retrovirus receptor                        | -0.10                  | TGGATCCTATGGACTCCAAA  | NM_004736:                                                   | NM_004736: |
|            | XR_000088: |                                                                      | -1.25                  | ACCACCAGCATCTAATACAA  | XR_000088:                                                   | XR_000088: |
|            | XR_000088: |                                                                      | 0.98                   | TAAGATTGGCTCGTATAACAA | XR_000088:                                                   | XR_000088: |
|            | XR_000278: |                                                                      | 0.86                   | CAGCCTGATGGGAGACTCTTA | XR_000278:                                                   | XR_000278: |
|            | XR_000278: |                                                                      | 0.09                   | CAGAGTAGTCTTGTCTCCGAA | XR_000278:                                                   | XR_000278: |
|            | XR_000282: |                                                                      | -0.47                  | TCCGGGTTCCCAAGAACTAAA | XR_000282:                                                   | XR_000282: |
|            | XR_000282: |                                                                      | -3.44                  | CAGGTGTAGATCACCTATTAT | XR_000282:                                                   | XR_000282: |
| 7515       | XRCC1      | X-ray repair complementing defective repair in Chinese hamster cells | -2.38                  | CCGATACGTACACAGCTTCAA | NM_006297:                                                   | NM_006297: |
| 7515       | XRCC1      | X-ray repair complementing defective repair in Chinese hamster cells | -1.40                  | CCGATGGATCTACAGTTGCAA | NM_006297:                                                   | NM_006297: |
| 7516       | XRCC2      | X-ray repair complementing defective repair in Chinese hamster cells | -4.99                  | CAGGGTACTACGCAAGCCTTA | NM_005431:                                                   | NM_005431: |
| 7516       | XRCC2      | X-ray repair complementing defective repair in Chinese hamster cells | -0.43                  | TTGCAACGACACAACATATAA | NM_005431:                                                   | NM_005431: |

|        |              |                                                                      |       |                        |            |                                          |
|--------|--------------|----------------------------------------------------------------------|-------|------------------------|------------|------------------------------------------|
| 7517   | XRCC3 (X-ra) | X-ray repair complementing defective repair in Chinese hamster cells | 0.47  | CAGAATTATTGCTGCAATTAA  | NM_005432: | NM_005432:                               |
| 7517   | XRCC3 (X-ra) | X-ray repair complementing defective repair in Chinese hamster cells | 0.13  | GAGACACTTAAGGGAAATTA   | NM_005432: | NM_005432:                               |
| 7518   | XRCC4 (X-ra) | X-ray repair complementing defective repair in Chinese hamster cells | -0.50 | CACATTTATCATATTCATTCA  | NM_003401: | NM_022550:NM_022406:NM_003401:           |
| 7518   | XRCC4 (X-ra) | X-ray repair complementing defective repair in Chinese hamster cells | 1.52  | CAGCTGATGTATACACGTTTA  | NM_003401: | NM_022550:NM_022406:NM_003401:           |
| 7520   | XRCC5        | X-ray repair complementing defective repair in Chinese hamster cells | 0.95  | AAGCATAACTATGAGTGTTTA  | NM_021141: | NM_021141:                               |
| 7520   | XRCC5        | X-ray repair complementing defective repair in Chinese hamster cells | -5.61 | AAGCGAGTACCAGCTCATAA   | NM_021141: | NM_021141:                               |
| 2547   | XRCC6        | X-ray repair complementing defective repair in Chinese hamster cells | -0.16 | CGCCTAGTGAGCAGTAGCCAA  | NM_001469: | NM_001469:                               |
| 9942   | XYLB         | xylofukinase homolog (H. influenzae)                                 | 1.41  | CTGAAATTTTGGAGCTCAT    | NM_005108: | NM_005108:                               |
| 9942   | XYLB         | xylofukinase homolog (H. influenzae)                                 | 1.19  | TCAGGACTCCAGCTAAATCAA  | NM_005108: | NM_005108:                               |
| 10138  | YAF2         | YY1 associated factor 2                                              | 0.22  | ACCAAACTTTCCAGACTTAA   | NM_005748: | NM_001012424:NM_005748:                  |
| 10138  | YAF2         | YY1 associated factor 2                                              | -0.28 | GACAGATACATTCATGCACAA  | NM_005748: | NM_001012424:NM_005748:                  |
| 10413  | YAP1         | Yes-associated protein 1, 65kDa                                      | -0.71 | CAGGTGATACATCAACCAAA   | NM_006106: | NM_006106:                               |
| 10413  | YAP1         | Yes-associated protein 1, 65kDa                                      | 0.80  | TAGAGTAGTAATGAAATCTA   | NM_006106: | NM_006106:                               |
| 8565   | YARS         | tyrosyl-tRNA synthetase                                              | -0.68 | CTGAAGGAGCGGGAACTTAAA  | NM_003680: | NM_003680:                               |
| 8565   | YARS         | tyrosyl-tRNA synthetase                                              | 0.01  | AACAGAGAACCTAGTGGCTA   | NM_003680: | NM_003680:                               |
| 51067  | YARS2        | tyrosyl-tRNA synthetase 2 (mitochondrial)                            | 0.01  | CCCGAGGGTATCGAATGATA   | NM_015936: | NM_015936:                               |
| 51067  | YARS2        | tyrosyl-tRNA synthetase 2 (mitochondrial)                            | -0.61 | AAGCTTGTTCATGACGAGAA   | NM_015936: | NM_015936:                               |
| 8089   | YEATS4       | YEATS domain containing 4                                            | -0.27 | TTGGTAGTAAAGCTAACTGAA  | NM_006530: | NM_006530:                               |
| 8089   | YEATS4       | YEATS domain containing 4                                            | 0.11  | CTCCATATGAAATTAAGTAAA  | NM_006530: | NM_006530:                               |
| 7525   | YES1         | v-yes-1 Yamaguchi sarcoma viral oncogene homolog 1                   | 0.36  | AACAGTCAGTATGCAATCTTA  | NM_005433: | NM_005433:                               |
| 7525   | YES1         | v-yes-1 Yamaguchi sarcoma viral oncogene homolog 1                   | 0.84  | AAGTATAATCGAGTACATTTA  | NM_005433: | NM_005433:                               |
| 10730  | YME1L1       | YME1-like 1 (S. cerevisiae)                                          | 1.03  | TCGGTTGATCCAGAAATTTATA | NM_014263: | NM_139312:NM_139313:NM_014263:           |
| 10730  | YME1L1       | YME1-like 1 (S. cerevisiae)                                          | 1.43  | TCGGGATTTATGGACTTCTAA  | NM_014263: | NM_139312:NM_139313:NM_014263:           |
| 51646  | YPEL5        | yippee-like 5 (Drosophila)                                           | 2.07  | TAAAGTTTCTTACCCTAAA    | NM_016494: | NM_016061:                               |
| 7529   | YWHAB        | tyrosine 3-monooxygenase/tryptophan 5-monooxygenase activation pr    | -2.03 | CAGCAATATGTTCACTATGTT  | NM_003404: | NM_003404:NM_139323:                     |
| 7529   | YWHAB        | tyrosine 3-monooxygenase/tryptophan 5-monooxygenase activation pr    | -0.01 | CTGGATAATCCAGAAATTTA   | NM_003404: | NM_003404:NM_139323:                     |
| 7532   | YWHAG        | tyrosine 3-monooxygenase/tryptophan 5-monooxygenase activation pr    | 1.71  | ACCGATGTTAGCTTAATCTTA  | NM_012479: | NM_012479:                               |
| 7532   | YWHAG        | tyrosine 3-monooxygenase/tryptophan 5-monooxygenase activation pr    | -1.47 | CCGATTAGCGCTGGCTTTAA   | NM_012479: | NM_012479:                               |
| 7533   | YWHAH        | tyrosine 3-monooxygenase/tryptophan 5-monooxygenase activation pr    | 0.23  | CAGGCTACAGTGATATTTAA   | NM_003405: | NM_003405:                               |
| 7533   | YWHAH        | tyrosine 3-monooxygenase/tryptophan 5-monooxygenase activation pr    | 0.81  | TTCCATCAGCTTTATAATAAA  | NM_003405: | NM_003405:                               |
| 10971  | YWHAQ        | tyrosine 3-monooxygenase/tryptophan 5-monooxygenase activation pr    | -0.22 | CAAACATAGATAATCCCAA    | NM_006826: | NM_006826:                               |
| 10971  | YWHAQ        | tyrosine 3-monooxygenase/tryptophan 5-monooxygenase activation pr    | -0.60 | CTGGAATTGTTGGATAAATAT  | NM_006826: | NM_006826:                               |
| 7528   | YY1          | YY1 transcription factor                                             | 0.58  | AACCTGAAATCTCACATCTTA  | NM_003403: | NM_003403:                               |
| 7528   | YY1          | YY1 transcription factor                                             | 0.26  | ATGCCTTCCTTGTATATTA    | NM_003403: | NM_003403:                               |
| 145482 | ZADH1        | zinc binding alcohol dehydrogenase, domain containing 1              | -0.05 | ACAAATGTTTGTAAACATGAA  | NM_152444: | NM_152444:                               |
| 145482 | ZADH1        | zinc binding alcohol dehydrogenase, domain containing 1              | 0.69  | TACATGATTTTAAACATGAA   | NM_152444: | NM_152444:                               |
| 284273 | ZADH2        | zinc binding alcohol dehydrogenase, domain containing 2              | 0.00  | TACGATGGTCTCAACACCTTT  | NM_175907: | NM_175907:                               |
| 284273 | ZADH2        | zinc binding alcohol dehydrogenase, domain containing 2              | -0.47 | ACGTTACATTCATCTTTTA    | NM_175907: | NM_175907:                               |
| 51776  | ZAK          | sterile alpha motif and leucine zipper containing kinase AZK         | -0.53 | ACGTGGTAGTATATCACTCAA  | NM_016653: | NM_016653:                               |
| 51776  | ZAK          | sterile alpha motif and leucine zipper containing kinase AZK         | 0.41  | TCGGGTAGCAACAACTTATT   | NM_016653: | NM_016653:                               |
| 7455   | ZAN (zonadh) | zonadhesin                                                           | -2.04 | CAGCTTAAGAATGGCCAGTAT  | NM_173059: | NM_173055:NM_173056:NM_003386:NM_173059: |
| 7455   | ZAN (zonadh) | zonadhesin                                                           | -1.65 | CCCGGCTATGTGCTGAGTGAA  | NM_173059: | NM_173055:NM_173056:NM_003386:NM_173059: |
| 7535   | ZAP70        | zeta-chain (TCR) associated protein kinase 70kDa                     | 0.30  | CGCAACGCTCCTGCTGGTTAA  | NM_001079: | NM_173055:NM_173056:                     |
| 7535   | ZAP70        | zeta-chain (TCR) associated protein kinase 70kDa                     | 1.32  | GGCGTAGATCACCAGAAATAA  | NM_001079: | NM_207519:NM_001079:                     |
| 9189   | ZBED1        | zinc finger, BED-type containing 1                                   | 0.64  | ATGCTTGTGTAATAACTTAA   | NM_004729: | NM_004729:                               |
| 9189   | ZBED1        | zinc finger, BED-type containing 1                                   | 0.91  | CGAGATCGACATGTTCTCAA   | NM_004729: | NM_004729:                               |
| 27107  | ZBTB11       | zinc finger and BTB domain containing 11                             | 1.10  | ACGGACCCATATACTTTATAA  | NM_152700: | NM_014415:                               |
| 7704   | ZBTB16       | zinc finger and BTB domain containing 16                             | 0.17  | AGGAAGGACTATGACAAATAA  | NM_006006: | NM_006006:NM_001018011:                  |
| 7704   | ZBTB16       | zinc finger and BTB domain containing 16                             | 0.23  | CGGGATGAGAGCACACTCAA   | NM_006006: | NM_006006:NM_001018011:                  |
| 51530  | ZC3HC1       | zinc finger, C3HC-type containing 1                                  | -0.37 | AGGGAGAAATGGTGAAGCTAA  | NM_016478: | NM_016478:                               |
| 23390  | ZDHC17       | zinc finger, DHHC-type containing 17                                 | 0.28  | CAGTACCTGTTTATACAGAA   | NM_015336: | NM_015336:                               |
| 23390  | ZDHC17       | zinc finger, DHHC-type containing 17                                 | 0.39  | CCGGATGAGTACGATACCGAA  | NM_015336: | NM_015336:                               |
| 51304  | ZDHC3        | zinc finger, DHHC-type containing 3                                  | -0.01 | CTCACCAAGATGGATGCTTA   | NM_016598: | NM_016598:                               |
| 51304  | ZDHC3        | zinc finger, DHHC-type containing 3                                  | 0.59  | TCCGTTCTCATGAATGTTTAA  | NM_016598: | NM_016598:                               |
| 9839   | ZFH1B        | zinc finger homeobox 1b                                              | 0.06  | CACGATCCAGACCAGCAATTA  | NM_014795: | NM_014795:                               |
| 9839   | ZFH1B        | zinc finger homeobox 1b                                              | 0.64  | CCACCATGAATAGTAATTTAA  | NM_014795: | NM_014795:                               |
| 7545   | ZIC1         | Zic family member 1 (odd-paired homolog, Drosophila)                 | 0.04  | CCAGGAAGATAAACCCGAAA   | NM_003412: | NM_003412:                               |
| 7545   | ZIC1         | Zic family member 1 (odd-paired homolog, Drosophila)                 | -0.63 | GTGAATTAATTTGATCGATTA  | NM_003412: | NM_003412:                               |
| 7546   | ZIC2         | Zic family member 2 (odd-paired homolog, Drosophila)                 | 0.35  | CAGAGGAACAATATTTTATAA  | NM_007129: | NM_007129:                               |
| 7546   | ZIC2         | Zic family member 2 (odd-paired homolog, Drosophila)                 | -2.31 | CAACCTGATTTGAAACTTCAT  | NM_007129: | NM_007129:                               |
| 7547   | ZIC3         | Zic family member 3 heterotaxy 1 (odd-paired homolog, Drosophila)    | 0.37  | TAGGCTTAAGTCACTCTTTA   | NM_003413: | NM_003413:                               |
| 7547   | ZIC3         | Zic family member 3 heterotaxy 1 (odd-paired homolog, Drosophila)    | -2.17 | AAGGCTGATTTGTTGCTGTA   | NM_003413: | NM_003413:                               |
| 10269  | ZMPSTE24     | zinc metalloproteinase (STE24 homolog, yeast)                        | -0.71 | CAGAACAGGAAAGACGAATTA  | NM_005857: | NM_005857:                               |
| 10269  | ZMPSTE24     | zinc metalloproteinase (STE24 homolog, yeast)                        | -0.09 | ACGAAGGTGATGTTGGGAA    | NM_005857: | NM_005857:                               |
| 10771  | ZMYND11      | zinc finger, MYND domain containing 11                               | 0.18  | TAGGAATGGATGATGATGTA   | NM_006624: | NM_006624:                               |
| 10771  | ZMYND11      | zinc finger, MYND domain containing 11                               | -0.04 | CACCTCATGTATCGTAAGTTA  | NM_006624: | NM_006624:                               |
| 116225 | ZMYND19      | zinc finger, MYND-type containing 19                                 | 0.58  | CAGGACGGTCTCATTATTTA   | NM_138462: | NM_138462:                               |
| 116225 | ZMYND19      | zinc finger, MYND-type containing 19                                 | -0.55 | CACGGGAGTGTGTCCACAAA   | NM_138462: | NM_138462:                               |
| 94039  | ZNF101       | zinc finger protein 101                                              | 1.98  | CACAGTAAACCAACTCGAAA   | NM_033204: | NM_033204:                               |
| 94039  | ZNF101       | zinc finger protein 101                                              | -0.99 | CACGGGCGACAGTAAACCCAA  | NM_033204: | NM_033204:                               |
| 10168  | ZNF197       | zinc finger protein 197                                              | -0.01 | CACCTACACTTTAGACAATTA  | NM_006991: | NM_006991:NM_01024855:                   |
| 10168  | ZNF197       | zinc finger protein 197                                              | -1.45 | TCCCAACTTTCAAGTCTCAA   | NM_006991: | NM_006991:                               |
| 7750   | ZNF198       | zinc finger protein 198                                              | -2.56 | ACGCTGGGTATTACCATGTTA  | NM_003453: | NM_003453:NM_197968:                     |
| 7750   | ZNF198       | zinc finger protein 198                                              | -1.98 | CACGCTGGGTATTACCATGTA  | NM_003453: | NM_003453:NM_197968:                     |
| 9406   | ZNF265       | zinc finger protein 265                                              | 0.57  | AAGGAAGTTGAAGATAAAGAA  | NM_005455: | NM_005455:NM_203350:                     |
| 9406   | ZNF265       | zinc finger protein 265                                              | 0.32  | GTGGTGTGTTGTAAGATAA    | NM_005455: | NM_005455:NM_203350:                     |
| 23528  | ZNF281       | zinc finger protein 281                                              | -2.13 | CCCAATGGCCTTTATCATGTA  | NM_003123: | NM_012482:                               |
| 63925  | ZNF335       | zinc finger protein 335                                              | -0.60 | TGGCCTGTCAGTCTCAATAA   | NM_022095: | NM_022095:                               |
| 63925  | ZNF335       | zinc finger protein 335                                              | -8.93 | CAGGCGCTTCCTAGGCAAGAA  | NM_022095: | NM_022095:                               |
| 23567  | ZNF346       | zinc finger protein 346                                              | 1.30  | ACGCAAGAACTTAAAGCTGA   | NM_012279: | NM_012279:                               |
| 23567  | ZNF346       | zinc finger protein 346                                              | 0.37  | CGCAAGAACTTAAAGCTGAA   | NM_012279: | NM_012279:                               |
| 27246  | ZNF364       | zinc finger protein 364                                              | 0.16  | CTGAATAGAATAATTCCTTA   | NM_014455: | NM_014455:                               |
| 27246  | ZNF364       | zinc finger protein 364                                              | 0.25  | AGGGCTGTGGTAATCACTTTA  | NM_014455: | NM_014455:                               |
| 57541  | ZNF398       | zinc finger protein 398                                              | 0.00  | CAGCAGGTTGATAGTAGATTA  | NM_020781: | NM_170686:NM_020781:                     |
| 57541  | ZNF398       | zinc finger protein 398                                              | -0.29 | CTGGACCTATACCATGGGAAA  | NM_020781: | NM_170686:NM_020781:                     |
| 10224  | ZNF443       | zinc finger protein 443                                              | 0.70  | TCGGTCATTATGATAACTTAA  | NM_005815: | NM_005815:                               |
| 10224  | ZNF443       | zinc finger protein 443                                              | 1.47  | TTGGTCATTATGATAACTTAA  | NM_005815: | NM_005815:                               |
| 55311  | ZNF444       | zinc finger protein 444                                              | 0.91  | CAGCATCCATAGAGTAATAA   | NM_018337: | NM_018337:                               |
| 55311  | ZNF444       | zinc finger protein 444                                              | -1.21 | CTGGTCTTGTCCCTAGGAAAT  | NM_018337: | NM_018337:                               |
| 168544 | ZNF467       | zinc finger protein 467                                              | -1.70 | CAGGAAAGAGTGGTATTTTAT  | NM_207336: | NM_207336:                               |
| 168544 | ZNF467       | zinc finger protein 467                                              | -0.16 | CCGCTCTTCTCTGAGCCTA    | NM_207336: | NM_207336:                               |
| 169270 | ZNF596       | zinc finger protein 596                                              | 1.32  | CAGCACTCTATAATAGATCA   | NM_173539: | NM_173539:                               |
| 169270 | ZNF596       | zinc finger protein 596                                              | 0.35  | TACCACCTTGCTCAACCTAAA  | NM_173539: | NM_173539:                               |
| 90850  | ZNF598       | zinc finger protein 598                                              | -1.67 | CCGCCCTGTGGCAGCACTCAA  | NM_178167: | NM_178167:                               |
| 90850  | ZNF598       | zinc finger protein 598                                              | -1.79 | AAGCACCTTCTGTGTGAGGAA  | NM_178167: | NM_178167:                               |
| 80095  | ZNF606       | zinc finger protein 606                                              | 1.17  | TCCACATTAATTAAGTAAA    | NM_025027: | NM_025027:                               |
| 80095  | ZNF606       | zinc finger protein 606                                              | 1.92  | AGAGTTTACCGCAACTTAAA   | NM_025027: | NM_025027:                               |

|        |         |                                                                            |       |                        |            |                                                |
|--------|---------|----------------------------------------------------------------------------|-------|------------------------|------------|------------------------------------------------|
| 58491  | ZNF71   | zinc finger protein 71 (Cos26)                                             | -0.10 | CAGCAGCAGGTTTGATTTCA   | NM_021216: | NM_021216:                                     |
| 58491  | ZNF71   | zinc finger protein 71 (Cos26)                                             | 0.00  | CGAAGCTCGCCCTGATAAA    | NM_021216: | NM_021216:                                     |
| 7639   | ZNF85   | zinc finger protein 85 (HPF4, HTF1)                                        | 0.90  | CAGCATCAGAAAGTACTTAAT  | NM_003429: | NM_003429:                                     |
| 7639   | ZNF85   | zinc finger protein 85 (HPF4, HTF1)                                        | 1.97  | AAAGTTTAATCAATTTACAAA  | NM_003429: | NM_003429:                                     |
| 7555   | ZNF9    | zinc finger protein 9 (a cellular retroviral nucleic acid binding protein) | -1.42 | CACATAGATGGTGTGGCAAA   | NM_003418: | NM_003418:                                     |
| 7555   | ZNF9    | zinc finger protein 9 (a cellular retroviral nucleic acid binding protein) | 0.09  | CTGACCTCAGTAGCTATTAAA  | NM_003418: | NM_003418:                                     |
| 10320  | ZNFN1A1 | zinc finger protein, subfamily 1A, 1 (Ikaros)                              | -0.49 | CACCGCTCCACATGAGCTAA   | NM_006060: | NM_006060:                                     |
| 10320  | ZNFN1A1 | zinc finger protein, subfamily 1A, 1 (Ikaros)                              | 1.65  | AAGTAACGTCGCCAAACGTAA  | NM_006060: | NM_006060:                                     |
| 9326   | ZNHIT3  | zinc finger, HIT type 3                                                    | 0.62  | ACAGTTGATAGACATCATAAA  | NM_004773: | NM_004773:                                     |
| 9326   | ZNHIT3  | zinc finger, HIT type 3                                                    | -3.38 | CTCATGAGAGCTTACATGCAA  | NM_004773: | NM_004773:                                     |
| 84937  | ZNRF1   | zinc and ring finger 1                                                     | -0.11 | CAGCGGAGAAACACTAAAGAA  | NM_032268: | NM_032268:                                     |
| 84937  | ZNRF1   | zinc and ring finger 1                                                     | 0.51  | AAGTGTATACAATCAAGAAA   | NM_032268: | NM_032268:                                     |
| 223082 | ZNRF2   | zinc and ring finger 2                                                     | 0.68  | CGCCAAAGTTAACTGATTTAA  | NM_147128: | NM_147128:                                     |
| 223082 | ZNRF2   | zinc and ring finger 2                                                     | 0.52  | ACGCCAAAGTTAACTGATTTAA | NM_147128: | NM_147128:                                     |
| 84133  | ZNRF3   | zinc and ring finger 3                                                     | -3.80 | CTGCTGTTCTATGAAGAGAA   | XM_290972: | XM_290972:                                     |
| 84133  | ZNRF3   | zinc and ring finger 3                                                     | -0.54 | CCCGGTCCCGCCAACTCTA    | XM_290972: | XM_290972:                                     |
| 148066 | ZNRF4   | zinc and ring finger 4                                                     | -0.58 | AAGAATAAAGTGGGTTTGAAA  | NM_181710: | NM_181710:                                     |
| 148066 | ZNRF4   | zinc and ring finger 4                                                     | -2.56 | CAGCTTGTACTCCACCACCTA  | NM_181710: | NM_181710:                                     |
| 54764  | ZRANB1  | zinc finger, RAN-binding domain containing 1                               | -0.40 | CAGATCTGTAATGACCCTAAA  | NM_017580: | NM_017580:                                     |
| 54764  | ZRANB1  | zinc finger, RAN-binding domain containing 1                               | 0.38  | CAAGGGTGAATCTTCGTATA   | NM_017580: | NM_017580:                                     |
| 84083  | ZRANB3  | zinc finger, RAN-binding domain containing 3                               | -1.95 | CCGATTACATCTATACTAA    | NM_032143: | NM_032143:                                     |
| 9183   | ZW10    | ZW10, kinetochore associated, homolog (Drosophila)                         | -0.49 | ACCGGTGAATTTACAGACTTA  | NM_004724: | NM_004724:                                     |
| 9183   | ZW10    | ZW10, kinetochore associated, homolog (Drosophila)                         | 0.04  | TACCACGAAGTGATGAATTTA  | NM_004724: | NM_004724:                                     |
| 11130  | ZWINT   | ZW10 interactor                                                            | 1.58  | CAAATAAATATTTAAGGTTAA  | NM_007057: | NM_001005413:NM_001005414:NM_007057:NM_032997: |
| 11130  | ZWINT   | ZW10 interactor                                                            | 2.49  | CTGTTTCAGATGTTCAATTTA  | NM_007057: | NM_032997:NM_007057:NM_001005413:NM_001005414: |
